# Supplementary material
Source: PubMed Central journal article supplement (PMC6520049)

## **Supporting Information**

### **Screening the ToxCast Phase 1, Phase 2, and e1k Chemical Libraries for Inhibitors of Iodothyronine Deiodinases**

Jennifer H. Olker,<sup>\*,†,‡,§,1</sup> Joseph J. Korte,<sup>\*,†,‡,§</sup> Jeffrey S. Denny,<sup>\*,†,‡,§</sup> Phillip C. Hartig,<sup>\*,†,‡,¶</sup> Mary C.  
Cardon,<sup>\*,†,‡,¶</sup> Carsten N. Knutsen,<sup>||</sup> Paige M. Kent,<sup>|||</sup> Jessica P. Christensen,<sup>|||</sup> Sigmund J. Degitz,<sup>\*,†,‡,§</sup>  
and Michael W. Hornung<sup>\*,†,‡,§</sup>

<sup>\*</sup>U.S. Environmental Protection Agency, <sup>†</sup>Office of Research and Development, <sup>‡</sup>National Health and  
Environmental Effects Research Laboratory, <sup>§</sup>Mid-Continent Ecology Division, Duluth, Minnesota,  
55804; <sup>¶</sup>Toxicity Assessment Division, Research Triangle Park, North Carolina 27709; <sup>||</sup>Student  
Services Contractor to the U.S. EPA, NHEERL, Mid-Continent Ecology Division, Duluth, Minnesota,  
55804; <sup>|||</sup>ORAU Student Services Contractor to the U.S. EPA, NHEERL, Mid-Continent Ecology  
Division, Duluth, Minnesota, 55804.

<sup>1</sup>To whom correspondence should be addressed at U.S. EPA, 6201 Congdon Blvd, Duluth, MN 55804  
USA. E-mail: [olker.jennifer@epa.gov](mailto:olker.jennifer@epa.gov) Tel: 218-529-5119 Fax: 218-529-5003

Number of Tables: 7

Number of Figures: 5

## Supplemental Tables

|                                                                                                                                                                                                                                                                                                                                                                                                                                                                                                                                |    |
|--------------------------------------------------------------------------------------------------------------------------------------------------------------------------------------------------------------------------------------------------------------------------------------------------------------------------------------------------------------------------------------------------------------------------------------------------------------------------------------------------------------------------------|----|
| Supplemental Table 1. ....                                                                                                                                                                                                                                                                                                                                                                                                                                                                                                     | 3  |
| Description of the final assay conditions for iodotyrosine deiodinase enzyme inhibition assays. All incubations were three hours at 37 °C in a volume of 120 µl.                                                                                                                                                                                                                                                                                                                                                               |    |
| Supplemental Table 2. ....                                                                                                                                                                                                                                                                                                                                                                                                                                                                                                     | 4  |
| Model inhibitor (xanthohumol) concentration-response curve and assay performance metrics for the two test plates used in assay development for deiodinase type 2 (DIO2) and deiodinase type 3 (DIO3).                                                                                                                                                                                                                                                                                                                          |    |
| Supplemental Table 3. ....                                                                                                                                                                                                                                                                                                                                                                                                                                                                                                     | 5  |
| Set of chemicals used in assay development and tested for inhibition of deiodinase type 2 (DIO2) in concentration-response mode with maximum concentration of 1 mM. Median percent inhibition (n=3 replicates) shown for 1 mM and 200 µM, with absolute IC20, absolute IC50, and Hill slope for chemicals with Hill model as the best fit in ToxCast Pipeline (v1.0).                                                                                                                                                          |    |
| Supplemental Table 4. ....                                                                                                                                                                                                                                                                                                                                                                                                                                                                                                     | 6  |
| Set of chemicals used in assay development and tested for inhibition of deiodinase type 3 (DIO3) in concentration-response mode with maximum concentration of 1 mM. Median percent inhibition (n=3 replicates) shown for 1 mM and 200 µM, with absolute IC20, absolute IC50, and Hill slope for chemicals with Hill model as the best fit in ToxCast Pipeline (v1.0).                                                                                                                                                          |    |
| Supplemental Table 5. ....                                                                                                                                                                                                                                                                                                                                                                                                                                                                                                     | 7  |
| Chemical samples that were identified as interfering with the assay and therefore were excluded from analyses.                                                                                                                                                                                                                                                                                                                                                                                                                 |    |
| Supplemental Table 6. ....                                                                                                                                                                                                                                                                                                                                                                                                                                                                                                     | 8  |
| <u>Single concentration results.</u> List of all chemicals tested in the deiodinase (DIO) inhibition assays, ordered by ToxCast chemical library and CASRN; maximum concentration tested and median % inhibition (n = 3 replicates) produced in DIO1, DIO2, and DIO3 single-point screening assay, with indication (Y = yes, N = no) of whether chemical was tested in concentration-response (CR) for each enzyme.                                                                                                            |    |
| Supplemental Table 7. ....                                                                                                                                                                                                                                                                                                                                                                                                                                                                                                     | 59 |
| <u>Concentration-response results.</u> Chemicals that produced greater than 50% median inhibition in the single-point screen in an assay as well as a subset that produced less than 50% median inhibition were further tested in concentration-response; the 240 chemicals are organized by source, with name, CASRN, maximum concentration tested, median % inhibition at maximum concentration, and, absolute IC20, absolute IC50, and Hill slope for chemicals with Hill model as the best fit in ToxCast Pipeline (v1.0). |    |

## Supplemental Figures

- Supplemental Figure 1. .... 66  
An example layout for the assay plate for the single-point screening with single target concentration of 200  $\mu$ M. Plates were received with column 1 empty for the concentration-response curve for the model inhibitor, 6-propylthiouracil (PTU) or xanthohumol (XTH) to be added. Twelve additional wells were left empty on the source plate to which dimethyl sulfoxide (DMSO) was added to 6 of these wells (white blocks) and the model inhibitor (orange blocks) was added to the remaining 6 wells to establish the fully inhibited response level. Sample chemicals repeated across multiple plates are indicated with an asterisk. These were randomly assigned to wells on each plate.
- Supplemental Figure 2. .... 66  
Assay plate layout for concentration-response screening. The concentration-response curve for the model inhibitor, 6-propylthiouracil (PTU) or xanthohumol (XTH) was in column 1. Row H had 5 additional dimethyl sulfoxide (DMSO) wells (white blocks) and 6 additional wells with the model inhibitor (orange blocks) to establish the fully inhibited response level.
- Supplemental Figure 3. .... 67  
Deiodinase inhibition produced by test chemicals that were randomly replicated across the chemical source plates to evaluate the plate-to-plate variability. These included allethrin, azoxystrobin, bensulide (DIO1 only), bisphenol A, chlorophene, dibutyl phthalate, mancozeb, perfluorooctane sulfonic acid (PFOS), triadimenol, and triclosan.
- Supplemental Figure 4. .... 68  
Concentration-response curves for deiodinase inhibition by model inhibitors with 6-propylthiouracil (PTU) for DIO1 and xanthohumol (XTH) for DIO2 and DIO3 from three example assay plates. Each triplicate test of a plate has different symbols and fit line, solid circle with solid line = rep 1, open triangle with dashed line = rep 2,  $\times$  with dotted line = rep 3.
- Supplemental Figure 5. .... 69  
Concentration-response data. Deiodinase inhibition produced by all chemicals tested in concentration-response mode at seven concentrations. Hill model curve, absolute IC<sub>50</sub>, and Hill slope included for the chemicals where Hill model fit in ToxCast pipeline (tcpl v1.0). Results from all three assays are provided side-by-side for each chemical on the following 240 pages, with chemicals ordered by ToxCast library, matching Supplemental Table 7.

**Supplemental Table 1.** Description of the final assay conditions for iodotyrosine deiodinase enzyme inhibition assays. All incubations were three hours at 37 °C in a volume of 120 µl.

HEPES = 4-(2-hydroxyethyl)-1-piperazineethanesulfonic acid; DTT = Dithiothreitol; EDTA = Ethylenediaminetetraacetic acid; DMSO = Dimethyl sulfoxide; rT3 = 3,3',5'-triiodo-L-thyronine (reverse T3); T4 = Thyroxine; T3 = Triiodothyronine; 3,3'-T2 = 3,3'-Diiodo-L-thyronine (T2).

| <b>Enzyme</b>            | <b>Cell Lysate Protein<sup>a</sup></b> | <b>Substrate</b> | <b>Products</b>    | <b>pH<sup>b</sup></b> | <b>Common Components</b>                         |
|--------------------------|----------------------------------------|------------------|--------------------|-----------------------|--------------------------------------------------|
| Deiodinase Type 1 (DIO1) | 10 µg                                  | 10 µM rT3        | 3,3'-T2 and Iodide | 7.0                   | 0.1 M HEPES<br>40 mM DTT<br>1 mM EDTA<br>1% DMSO |
| Deiodinase Type 2 (DIO2) | 20 µg                                  | 5 µM T4          | T3 and Iodide      | 7.0                   | 0.1 M HEPES<br>40 mM DTT<br>1 mM EDTA<br>1% DMSO |
| Deiodinase Type 3 (DIO3) | 1 µg                                   | 5 µM T3          | 3,3'-T2 and Iodide | 8.0                   | 0.1 M HEPES<br>40 DTT mM<br>1 mM EDTA<br>1% DMSO |

<sup>a</sup> Based on optimum iodide release for Sandell-Kolthoff reaction; specific activity of enzymes approximated at 9, 5, and 90 pmoles iodide/h/µg of protein for DIO1, DIO2, and DIO3, respectively.

<sup>b</sup> Selected based on optimum pH and reported assay conditions in previous studies (Hornung et al., 2018; Renko et al., 2015).

**Supplemental Table 2.** Model inhibitor (xanthohumol) concentration-response curve and assay performance metrics for the two test plates used in assay development for deiodinase type 2 (DIO2) and deiodinase type 3 (DIO3).

| Enzyme | Plate        | Xanthohumol               |                            |                                   | DMSO-MAD <sup>c</sup><br>median | Z' factor <sup>d</sup> |       |
|--------|--------------|---------------------------|----------------------------|-----------------------------------|---------------------------------|------------------------|-------|
|        |              | IC50 <sup>a</sup> ,<br>μM | Hill<br>slope <sup>a</sup> | 200 μM-MAD <sup>b</sup><br>median |                                 | mean                   | SD    |
| DIO2   | Test Plate 1 | 0.40                      | -0.82                      | 3.40                              | 1.83                            | 0.821                  | 0.085 |
| DIO2   | Test Plate 2 | 1.10                      | -0.98                      | 6.88                              | 1.89                            | 0.727                  | 0.052 |
| DIO3   | Test Plate 1 | 0.21                      | -0.78                      | 3.36                              | 2.01                            | 0.757                  | 0.060 |
| DIO3   | Test Plate 2 | 0.39                      | -0.91                      | 2.04                              | 1.03                            | 0.886                  | 0.019 |

<sup>a</sup> IC50 and Hill slope from four-parameter logistic model was calculated from the three replicate runs of each test plate.

<sup>b</sup> 200 μM-MAD is the platewise positive control median absolute deviation calculated from all the 200 μM wells of the model inhibitor in each of the replicated assay plates.

<sup>c</sup> DMSO-MAD is the platewise median absolute deviation calculated from all the DMSO wells in each of the replicated assay plates.

<sup>d</sup> Z' factor is a measure of assay quality, with value of >0.5 indicating good separation between the positive and negative controls.

**Supplemental Table 3.** Set of chemicals used in assay development and tested for inhibition of deiodinase type 2 (DIO2) in concentration-response mode with maximum concentration of 1 mM. Median percent inhibition (n=3 replicates) shown for 1 mM and 200  $\mu$ M, with absolute IC20, absolute IC50, and Hill slope for chemicals with Hill model as the best fit in ToxCast Pipeline (v1.0).

|                     | Chemical                             | CASRN      | Source <sup>a</sup> | Median % Inhibition |             | IC20 ( $\mu$ M) | IC50 ( $\mu$ M) | Hill slope |
|---------------------|--------------------------------------|------------|---------------------|---------------------|-------------|-----------------|-----------------|------------|
|                     |                                      |            |                     | 1 mM                | 200 $\mu$ M |                 |                 |            |
| <b>Test Plate 1</b> | Chlorophene                          | 120-32-1   | SA                  | 101.4               | 77.8        | 86.7            | 134             | -3.2       |
|                     | Aurothioglucose hydrate <sup>b</sup> | 12192-57-3 | SA                  | -- <sup>c</sup>     | 77.5        | 2.8             | 28.9            | -0.6       |
|                     | 2-Aminobenzothiazole                 | 136-95-8   | SA                  | -9.1                | -4.7        | NA <sup>d</sup> | NA              | NA         |
|                     | 2-Mercaptobenzothiazole              | 149-30-4   | FL                  | 43.4                | 12.7        | 278             | 1,505           | -1.4       |
|                     | Oryzalin                             | 19044-88-3 | FL                  | -- <sup>e</sup>     | 82.5        | 103             | 142             | -4.3       |
|                     | Triclosan                            | 3380-34-5  | SA                  | 96.8                | 93.6        | 25.1            | 47.0            | -2.2       |
|                     | 5-Chloro-2-Mercaptobenzothiazole     | 5331-91-9  | TCI                 | 58.8                | 25.7        | 118             | 562             | -1.1       |
|                     | 2-(Methylthio) Benzothiazole         | 615-22-5   | TCI                 | 14                  | -1.4        | NA              | NA              | NA         |
|                     | 2-Hydroxybenzothiazole               | 934-34-9   | SA                  | -0.5                | -7.6        | NA              | NA              | NA         |
| Benzothiazole       | 95-16-9                              | SA         | -9                  | -6.0                | NA          | NA              | NA              |            |
| <b>Test Plate 2</b> | 2-Aminobenzothiazole                 | 136-95-8   | SA                  | 5.9                 | -0.7        | NA              | NA              | NA         |
|                     | Tert-Butylhydroquinone               | 1948-33-0  | FL                  | 30.3                | 7.1         | 426             | NA              | -1.3       |
|                     | 4-Pentylaniline                      | 33228-44-3 | SA                  | 60.2                | -0.7        | 714             | 901             | -7.8       |
|                     | 2,2',4,4'-TBDPE                      | 5436-43-1  | CS                  | 7.8                 | 2.2         | NA              | NA              | NA         |
|                     | Methimazole                          | 60-56-0    | SA                  | 1.1                 | -1.7        | NA              | NA              | NA         |
|                     | Bisphenol A                          | 80-05-7    | SA                  | 60.3                | 7.1         | 324             | 751             | -1.8       |
|                     | Dibutylphthalate                     | 84-74-2    | SA                  | -2.4                | -1.2        | NA              | NA              | NA         |
|                     | 4-Bromobiphenyl                      | 92-66-0    | SA                  | 0.4                 | 9.5         | NA              | NA              | NA         |
|                     | 2-Hydroxybenzothiazole               | 934-34-9   | SA                  | 2.6                 | -0.5        | NA              | NA              | NA         |
|                     | Benzotriazole                        | 95-14-7    | SA                  | 4.9                 | 4.7         | NA              | NA              | NA         |
|                     | Benzothiazole                        | 95-16-9    | SA                  | 0.9                 | -4.9        | NA              | NA              | NA         |

<sup>a</sup> Chemicals used for development of the screening assay from stocks on hand at EPA/ORD/NHEERL/MED in Duluth, sources: SA = Sigma-Aldrich, FL=Honeywell Fluka, TCI=TCI America, CS=Chem Service Inc.

<sup>b</sup> Previously reported to inhibit DIO1, DIO2, and DIO3 (Renko et al., 2015).

<sup>c</sup> Not tested at 1 mM.

<sup>d</sup> NA = not applicable. The chemical did not produce an inhibition curve or the curve did not reach 20% or 50% inhibition, and therefore an IC20 or IC50 could not be calculated.

<sup>e</sup> Precipitate formation was observed and measured in 1 mM concentration.

**Supplemental Table 4.** Set of chemicals used in assay development and tested for inhibition of deiodinase type 3 (DIO3) in concentration-response mode with maximum concentration of 1 mM. Median percent inhibition (n=3 replicates) shown for 1 mM and 200  $\mu$ M, with absolute IC20, absolute IC50, and Hill slope for chemicals with Hill model as the best fit in ToxCast Pipeline (v1.0).

|                     | Chemical                             | CASRN      | Source <sup>a</sup> | Median % Inhibition |             | IC20 ( $\mu$ M) | IC50 ( $\mu$ M) | Hill slope |
|---------------------|--------------------------------------|------------|---------------------|---------------------|-------------|-----------------|-----------------|------------|
|                     |                                      |            |                     | 1 mM                | 200 $\mu$ M |                 |                 |            |
| <b>Test Plate 1</b> | Chlorophene                          | 120-32-1   | SA                  | 99.9                | 79.2        | 126             | 159             | -5.8       |
|                     | Aurothioglucose hydrate <sup>b</sup> | 12192-57-3 | SA                  | -- <sup>c</sup>     | 107.8       | 1.1             | 6.8             | -0.7       |
|                     | 2-Aminobenzothiazole                 | 136-95-8   | SA                  | 0.5                 | 0.8         | NA <sup>d</sup> | NA              | NA         |
|                     | 2-Mercaptobenzothiazole              | 149-30-4   | FL                  | 42.6                | 14.4        | 204             | 2,070           | -1.0       |
|                     | Oryzalin                             | 19044-88-3 | FL                  | -- <sup>e</sup>     | 25.0        | 181             | NA              | -5.8       |
|                     | Triclosan                            | 3380-34-5  | SA                  | 104.3               | 98.9        | 45.7            | 61.1            | -4.7       |
|                     | 5-Chloro-2-Mercaptobenzothiazole     | 5331-91-9  | TCI                 | 74.1                | 29.8        | 131             | 375             | -1.4       |
|                     | 2-(Methylthio) Benzothiazole         | 615-22-5   | TCI                 | 13.9                | 6.0         | NA              | NA              | NA         |
|                     | 2-Hydroxybenzothiazole               | 934-34-9   | SA                  | -1.6                | 0.6         | NA              | NA              | NA         |
| Benzothiazole       | 95-16-9                              | SA         | 1.7                 | -1.4                | NA          | NA              | NA              |            |
| <b>Test Plate 2</b> | 2-Aminobenzothiazole                 | 136-95-8   | SA                  | -2.3                | -3.9        | NA              | NA              | NA         |
|                     | Tert-Butylhydroquinone               | 1948-33-0  | FL                  | 44.4                | 4.3         | 443             | 1,333           | -2.5       |
|                     | 4-Pentylaniline                      | 33228-44-3 | SA                  | 19.3                | -3.0        | 1,008           | NA              | -8.0       |
|                     | 2,2',4,4'-TBDPE                      | 5436-43-1  | CS                  | 5.0                 | 1.2         | NA              | NA              | NA         |
|                     | Methimazole                          | 60-56-0    | SA                  | -7.6                | -2.6        | NA              | NA              | NA         |
|                     | Bisphenol A                          | 80-05-7    | SA                  | 32.9                | -3.1        | 838             | NA              | -8.0       |
|                     | Dibutylphthalate                     | 84-74-2    | SA                  | -0.2                | -5.9        | NA              | NA              | NA         |
|                     | 4-Bromobiphenyl                      | 92-66-0    | SA                  | -1.3                | -5.7        | NA              | NA              | NA         |
|                     | 2-Hydroxybenzothiazole               | 934-34-9   | SA                  | -4.4                | -3.8        | NA              | NA              | NA         |
|                     | Benzotriazole                        | 95-14-7    | SA                  | -7.1                | -5.0        | NA              | NA              | NA         |
|                     | Benzothiazole                        | 95-16-9    | SA                  | -1.3                | -3.2        | NA              | NA              | NA         |

<sup>a</sup> Chemicals used for development of the screening assay from stocks on hand at EPA/ORD/NHEERL/MED in Duluth, sources: SA = Sigma-Aldrich, FL=Honeywell Fluka, TCI=TCI America, CS=Chem Service Inc.

<sup>b</sup> Previously reported to inhibit DIO1, DIO2, and DIO3 (Renko et al., 2015).

<sup>c</sup> Not tested at 1 mM.

<sup>d</sup> NA = not applicable. The chemical did not produce an inhibition curve or the curve did not reach 20% or 50% inhibition, and therefore an IC20 or IC50 could not be calculated.

<sup>e</sup> Precipitate formation was observed and measured in 1 mM concentration.

**Supplemental Table 5.** Chemical samples that were identified as interfering with the assay and therefore were excluded from analyses.

| Chemical                                    | CASRN       | Source <sup>a</sup> | Reason Excluded                                                 |
|---------------------------------------------|-------------|---------------------|-----------------------------------------------------------------|
| 3-Iodo-2-propynyl-N-butylcarbamate          | 55406-53-6  | ph1v2               | Interference with Sandell-Kolthoff (SK) reaction                |
| Methylene bis(thiocyanate)                  | 6317-18-6   | ph1v2               | Interference with Sandell-Kolthoff (SK) reaction                |
| Diniconazole                                | 83657-24-3  | ph1v2               | Abnormal time course of absorbance at 420 nm <sup>b</sup>       |
| 9-Phenanthrol                               | 484-17-3    | ph2                 | Interference, reaction without enzyme in DIO2 and DIO3          |
| FD&C Blue No. 1                             | 3844-45-9   | ph2                 | Interference with Sandell-Kolthoff (SK) reaction                |
| Isophorone diisocyanate                     | 4098-71-9   | ph2                 | Abnormal time course of absorbance at 420 nm <sup>b</sup>       |
| Isopropyl triethanolamine titanate          | 36673-16-2  | ph2                 | Abnormal time course of absorbance at 420 nm <sup>b</sup>       |
| Reserpine                                   | 50-55-5     | ph2                 | Abnormal time course of absorbance at 420 nm <sup>b</sup>       |
| SSR150106                                   | NOCAS_47362 | ph2                 | Abnormal time course of absorbance at 420 nm <sup>b</sup>       |
| 3,5,3'-Triiodothyronine                     | 6893-02-3   | ph2                 | Contains free iodide or possibly being deiodinated by enzyme(s) |
| Amiodarone hydrochloride                    | 19774-82-4  | ph2                 | Contains free iodide or possibly being deiodinated by enzyme(s) |
| 1H,1H,2H,2H-Perfluorooctyl iodide           | 2043-57-4   | ph2                 | Contains free iodide or possibly being deiodinated by enzyme(s) |
| Tetrac                                      | 67-30-1     | ph2                 | Contains free iodide or possibly being deiodinated by enzyme(s) |
| C.I. Acid Red 114                           | 6459-94-5   | e1k                 | Interference, supramaximal response <sup>c</sup> in DIO1        |
| Thiocarbazide                               | 2231-57-4   | e1k                 | Interference with Sandell-Kolthoff (SK) reaction                |
| Eosin                                       | 17372-87-1  | e1k                 | Interference with Sandell-Kolthoff (SK) reaction                |
| C.I. Acid Yellow 3 disodium salt            | 8004-92-0   | e1k                 | Interference with Sandell-Kolthoff (SK) reaction                |
| Thiocyanic acid, ammonium salt              | 1762-95-4   | e1k                 | Interference with Sandell-Kolthoff (SK) reaction                |
| Sodium decyl sulfate                        | 142-87-0    | e1k                 | Abnormal time course of absorbance at 420 nm <sup>b</sup>       |
| Disiquonium chloride                        | 68959-20-6  | e1k                 | Abnormal time course of absorbance at 420 nm <sup>b</sup>       |
| C.I. Acid Blue 22                           | 28631-66-5  | e1k                 | Abnormal time course of absorbance at 420 nm <sup>b</sup>       |
| Silwet L77                                  | 27306-78-1  | e1k                 | Abnormal time course of absorbance at 420 nm <sup>b</sup>       |
| 3-Trifluoromethyl-4-nitrophenol             | 88-30-2     | e1k                 | Abnormal time course of absorbance at 420 nm <sup>b</sup>       |
| Dodecanoic acid                             | 143-07-7    | e1k                 | Abnormal time course of absorbance at 420 nm <sup>b</sup>       |
| Dodecyl sulfate triethanolamine             | 139-96-8    | e1k                 | Abnormal time course of absorbance at 420 nm <sup>b</sup>       |
| Sodium lauryl polyoxyethylene ether sulfate | 9004-82-4   | e1k                 | Abnormal time course of absorbance at 420 nm <sup>b</sup>       |
| Sodium tridecyl sulfate                     | 3026-63-9   | e1k                 | Abnormal time course of absorbance at 420 nm <sup>b</sup>       |
| Polyoxyethylene(10)nonylphenyl ether        | 26027-38-3  | e1k                 | Abnormal time course of absorbance at 420 nm <sup>b</sup>       |
| FD&C Red 3                                  | 16423-68-0  | e1k                 | Contains free iodide or possibly being deiodinated by enzyme(s) |
| Iopanoic acid                               | 96-83-3     | e1k                 | Contains free iodide or possibly being deiodinated by enzyme(s) |
| Sodium iodide                               | 7681-82-5   | e1k                 | Contains free iodide or possibly being deiodinated by enzyme(s) |
| 1,2-Ethanediamine dihydriodide              | 5700-49-2   | e1k                 | Contains free iodide or possibly being deiodinated by enzyme(s) |

<sup>a</sup> Source. ToxCast Chemical sets: ph1\_v2 indicates ToxCast phase1\_v2 chemical library, ph2 indicates ToxCast phase2 chemical library, and e1k indicates ToxCast e1k chemical library obtained via Dr. Ann Richard, EPA/ORD/NCCT, Research Triangle Park, NC, USA.

<sup>b</sup> Abnormal A420 time course: Chemical flagged based on absorbance at time 0 or 10 minutes outside of expected range based on DMSO and model inhibitor.

<sup>c</sup> Interference, supramaximal response: Reaction appeared more inhibited than the fully inhibited response by positive control (PTU).



**Supplemental Table 6. Single concentration results.** List of all chemicals tested in the deiodinase (DIO) inhibition assays, ordered by ToxCast chemical library and CASRN; maximum concentration tested and median % inhibition (n = 3 replicates) produced in DIO1, DIO2, and DIO3 single-point screening assay, with indication (Y = yes, N = no) of whether chemical was tested in concentration-response (CR) for each enzyme.

<sup>a</sup> Source. ToxCast Chemical sets: ph1v2 indicates ToxCast phase 1\_v2 chemical library, ph2 indicates ToxCast phase 2 chemical library, and e1k indicates ToxCast e1k chemical library obtained via Dr. Ann Richard, EPA/ORD/NCCT, Research Triangle Park, NC, USA. <sup>b</sup> Concentrations in  $\mu\text{M}$ , except where indicated as in  $\mu\text{g/ml}$  for the following compounds: adipic acid, polypropyleneglycol, laurate; clove leaf oil; C10-21 sulfonic acids phenyl esters; Grinstad Soft-N-Safe; cremophor EL; cornmint oil; peppermint oil; anise oil; polyoxyethylene monooleate; Igepal CO-890.

| Chemical             | CASRN       | Source <sup>a</sup> | DIO1                                  |                      |               | DIO2                                  |                      |               | DIO3                                  |                      |               |
|----------------------|-------------|---------------------|---------------------------------------|----------------------|---------------|---------------------------------------|----------------------|---------------|---------------------------------------|----------------------|---------------|
|                      |             |                     | Max conc., $\mu\text{M}$ <sup>b</sup> | % Inhibition, median | Tested in CR? | Max conc., $\mu\text{M}$ <sup>b</sup> | % Inhibition, median | Tested in CR? | Max conc., $\mu\text{M}$ <sup>b</sup> | % Inhibition, median | Tested in CR? |
| Boric acid           | 10043-35-3  | ph1v2               | 200                                   | -3.2                 | N             | 190                                   | -2.6                 | N             | 190                                   | -5.6                 | N             |
| Deisopropylatrazine  | 1007-28-9   | ph1v2               | 200                                   | 5.7                  | N             | 200                                   | 7.3                  | N             | 200                                   | 43.9                 | N             |
| Anilazine            | 101-05-3    | ph1v2               | 200                                   | 24.8                 | N             | 200                                   | 9.7                  | N             | 200                                   | 9.2                  | N             |
| Cloprop              | 101-10-0    | ph1v2               | 200                                   | 1.4                  | N             | 200                                   | -5.3                 | N             | 200                                   | 4.6                  | N             |
| Chlorpropham         | 101-21-3    | ph1v2               | 200                                   | -3.0                 | N             | 200                                   | 3.5                  | N             | 200                                   | -5.3                 | N             |
| Methamidophos        | 10265-92-6  | ph1v2               | 200                                   | 0.1                  | N             | 200                                   | 1.0                  | N             | 200                                   | -8.1                 | N             |
| Flumioxazin          | 103361-09-7 | ph1v2               | 200                                   | 9.2                  | N             | 200                                   | 19.0                 | N             | 200                                   | 3.8                  | N             |
| Imazapic             | 104098-48-8 | ph1v2               | 200                                   | 6.4                  | N             | 200                                   | -5.9                 | N             | 200                                   | -3.1                 | N             |
| Mesotrione           | 104206-82-8 | ph1v2               | 200                                   | 38.4                 | N             | 200                                   | 22.9                 | Y             | 200                                   | 56.1                 | Y             |
| Resmethrin           | 10453-86-8  | ph1v2               | 200                                   | 26.2                 | N             | 200                                   | 71.6                 | Y             | 200                                   | 70.4                 | Y             |
| Clodinafop-propargyl | 105512-06-9 | ph1v2               | 200                                   | 44.7                 | N             | 200                                   | 8.1                  | N             | 200                                   | 8.4                  | N             |
| 2-Methoxyethanol     | 109-86-4    | ph1v2               | 200                                   | 0.4                  | N             | 200                                   | 4.0                  | N             | 200                                   | -16.9                | N             |
| Dimethomorph         | 110488-70-5 | ph1v2               | 200                                   | 6.2                  | N             | 200                                   | 7.6                  | N             | 200                                   | -8.5                 | N             |
| Fenpyroximate (Z,E)  | 111812-58-9 | ph1v2               | 200                                   | -6.9                 | N             | 200                                   | 6.2                  | N             | 200                                   | -22.6                | N             |
| Thiacloprid          | 111988-49-9 | ph1v2               | 200                                   | 7.2                  | N             | 200                                   | 4.5                  | N             | 200                                   | 2.0                  | N             |
| Tetraconazole        | 112281-77-3 | ph1v2               | 200                                   | 4.5                  | N             | 190                                   | 11.8                 | N             | 190                                   | -12.5                | N             |
| Tebufozide           | 112410-23-8 | ph1v2               | 200                                   | 6.3                  | N             | 200                                   | 0.4                  | N             | 200                                   | 7.2                  | N             |
| MGK-264              | 113-48-4    | ph1v2               | 200                                   | 0.3                  | N             | 200                                   | 18.8                 | N             | 200                                   | -13.2                | N             |
| Cyclanilide          | 113136-77-9 | ph1v2               | 200                                   | 6.7                  | N             | 200                                   | 11.1                 | N             | 200                                   | 27.3                 | N             |
| Cycloate             | 1134-23-2   | ph1v2               | 200                                   | 3.5                  | N             | 200                                   | -0.4                 | N             | 200                                   | -16.7                | N             |
| Propoxur             | 114-26-1    | ph1v2               | 200                                   | -2.0                 | N             | 200                                   | 2.7                  | N             | 200                                   | 1.4                  | N             |
| Imazamox             | 114311-32-9 | ph1v2               | 200                                   | 9.3                  | N             | 200                                   | -1.0                 | N             | 200                                   | -19.8                | N             |
| Fenbuconazole        | 114369-43-6 | ph1v2               | 200                                   | -6.8                 | N             | 200                                   | 14.3                 | N             | 200                                   | -9.1                 | N             |
| Endosulfan           | 115-29-7    | ph1v2               | 200                                   | 8.1                  | N             | 200                                   | 17.6                 | N             | 200                                   | 8.0                  | N             |
| Dicofol              | 115-32-2    | ph1v2               | 200                                   | 88.0                 | Y             | 190                                   | 74.8                 | Y             | 190                                   | 90.3                 | Y             |
| Aldicarb             | 116-06-3    | ph1v2               | 200                                   | -0.8                 | N             | 200                                   | -2.4                 | N             | 200                                   | -6.8                 | N             |

|                            |             |       |     |       |   |     |      |   |     |       |   |
|----------------------------|-------------|-------|-----|-------|---|-----|------|---|-----|-------|---|
| Novaluron                  | 116714-46-6 | ph1v2 | 200 | 6.0   | N | 200 | -1.7 | N | 200 | 2.4   | N |
| Di(2-ethylhexyl) phthalate | 117-81-7    | ph1v2 | 200 | -1.2  | N | 200 | 5.3  | N | 200 | 2.0   | N |
| Fluthiacet-methyl          | 117337-19-6 | ph1v2 | 200 | -2.5  | N | 200 | 8.0  | N | 200 | 14.0  | N |
| Thiazopyr                  | 117718-60-2 | ph1v2 | 200 | -0.6  | N | 200 | 2.7  | N | 200 | -8.3  | N |
| Spiroxamine                | 118134-30-8 | ph1v2 | 200 | 10.6  | N | 200 | -3.3 | N | 200 | -3.1  | N |
| Tebufenpyrad               | 119168-77-3 | ph1v2 | 200 | -1.0  | N | 190 | 5.2  | N | 190 | -38.2 | N |
| Dichlobenil                | 1194-65-6   | ph1v2 | 200 | -1.6  | N | 200 | 2.0  | N | 200 | -24.2 | N |
| Difenoconazole             | 119446-68-3 | ph1v2 | 200 | -2.3  | N | 200 | 12.3 | N | 200 | -12.5 | N |
| Icaridin                   | 119515-38-7 | ph1v2 | 200 | 5.7   | N | 200 | 1.6  | N | 200 | -3.6  | N |
| Chlorophene                | 120-32-1    | ph1v2 | 200 | 44.8  | Y | 200 | 71.9 | Y | 200 | 70.0  | Y |
| Dichlorprop                | 120-36-5    | ph1v2 | 200 | 4.5   | N | 200 | 1.6  | N | 200 | -5.0  | N |
| Fipronil                   | 120068-37-3 | ph1v2 | 200 | 57.8  | Y | 200 | 71.7 | Y | 200 | 96.6  | Y |
| Cyazofamid                 | 120116-88-3 | ph1v2 | 200 | 71.5  | Y | 200 | 56.8 | Y | 200 | 18.5  | Y |
| Malathion                  | 121-75-5    | ph1v2 | 200 | 47.8  | N | 200 | 9.0  | N | 200 | 8.4   | N |
| Cyprodinil                 | 121552-61-2 | ph1v2 | 200 | -1.9  | N | 200 | 13.1 | N | 200 | -38.2 | N |
| Fenitrothion               | 122-14-5    | ph1v2 | 200 | 48.9  | N | 200 | 18.3 | N | 200 | 2.6   | N |
| Simazine                   | 122-34-9    | ph1v2 | 200 | -0.2  | N | 200 | 1.3  | N | 200 | 36.2  | N |
| Diphenylamine              | 122-39-4    | ph1v2 | 200 | 0.3   | N | 200 | 13.1 | N | 200 | 5.3   | N |
| 2-Phenoxyethanol           | 122-99-6    | ph1v2 | 200 | -1.6  | N | 200 | -3.2 | N | 200 | -4.9  | N |
| Cyhalofop-butyl            | 122008-85-9 | ph1v2 | 200 | 2.1   | N | 190 | -4.2 | N | 190 | 9.6   | N |
| Sulfentrazone              | 122836-35-5 | ph1v2 | 200 | -3.9  | N | 200 | 4.1  | N | 200 | -0.8  | N |
| Maleic hydrazide           | 123-33-1    | ph1v2 | 200 | 1.2   | N | 190 | -5.4 | N | 190 | 2.0   | N |
| Pymetrozine                | 123312-89-0 | ph1v2 | 200 | 0.9   | N | 200 | 10.6 | N | 200 | -6.8  | N |
| Pyriithiobac-sodium        | 123343-16-8 | ph1v2 | 200 | 5.3   | N | 200 | -0.5 | N | 200 | 1.3   | N |
| Maneb                      | 12427-38-2  | ph1v2 | 200 | 67.9  | Y | 200 | 45.7 | N | 200 | 37.9  | N |
| Quinoxifen                 | 124495-18-7 | ph1v2 | 200 | 43.4  | N | 200 | 59.6 | Y | 200 | 49.4  | Y |
| Fenhexamid                 | 126833-17-8 | ph1v2 | 200 | -13.6 | Y | 200 | 13.3 | N | 200 | -15.5 | N |
| Carfentrazone-ethyl        | 128639-02-1 | ph1v2 | 200 | 0.4   | N | 200 | 28.0 | N | 200 | 46.9  | N |
| Pyraflufen-ethyl           | 129630-19-9 | ph1v2 | 200 | -4.8  | N | 200 | -1.5 | N | 200 | 7.1   | N |
| Dimethyl phthalate         | 131-11-3    | ph1v2 | 200 | -1.0  | N | 200 | 2.5  | N | 200 | 4.7   | N |
| Monobutyl phthalate        | 131-70-4    | ph1v2 | 200 | -3.6  | N | 200 | -0.1 | N | 200 | -6.2  | N |
| Fludioxonil                | 131341-86-1 | ph1v2 | 200 | 0.5   | N | 200 | 2.3  | N | 200 | -44.8 | N |
| Famoxadone                 | 131807-57-3 | ph1v2 | 200 | 5.2   | N | 200 | 8.2  | N | 200 | 18.2  | N |
| Azoxystrobin               | 131860-33-8 | ph1v2 | 200 | -2.1  | N | 200 | 6.7  | N | 200 | 17.7  | N |
| Ethoprop                   | 13194-48-4  | ph1v2 | 200 | -5.3  | N | 200 | -1.6 | N | 200 | -10.5 | N |
| Triticonazole              | 131983-72-7 | ph1v2 | 200 | -1.0  | N | 190 | 7.4  | N | 190 | 7.9   | N |
| Captan                     | 133-06-2    | ph1v2 | 200 | 54.6  | Y | 190 | 28.7 | N | 190 | 28.1  | N |

|                                    |             |       |     |       |   |     |       |   |     |       |   |
|------------------------------------|-------------|-------|-----|-------|---|-----|-------|---|-----|-------|---|
| Folpet                             | 133-07-3    | ph1v2 | 200 | 32.3  | N | 200 | 35.6  | N | 200 | 44.0  | N |
| DEET                               | 134-62-3    | ph1v2 | 200 | -0.8  | N | 200 | 0.2   | N | 200 | -9.4  | N |
| Butafenacil                        | 134605-64-4 | ph1v2 | 200 | 1.7   | N | 200 | 7.5   | N | 200 | -7.9  | N |
| Acibenzolar-S-methyl               | 135158-54-2 | ph1v2 | 200 | 36.5  | N | 200 | 6.4   | N | 200 | 24.4  | N |
| Acetamiprid                        | 135410-20-7 | ph1v2 | 200 | -1.4  | N | 200 | 0.9   | N | 200 | 0.0   | N |
| Dipropyl 2,5-pyridinedicarboxylate | 136-45-8    | ph1v2 | 200 | -8.6  | N | 200 | -4.2  | N | 200 | -1.3  | N |
| Thiram                             | 137-26-8    | ph1v2 | 200 | 3.0   | N | 200 | 37.2  | Y | 200 | 69.6  | Y |
| Imidacloprid                       | 138261-41-3 | ph1v2 | 200 | 2.3   | N | 200 | 2.1   | N | 200 | 0.2   | N |
| Propazine                          | 139-40-2    | ph1v2 | 200 | 4.2   | N | 200 | 2.2   | N | 200 | 44.4  | N |
| Dicrotophos                        | 141-66-2    | ph1v2 | 200 | 0.7   | N | 200 | 5.4   | N | 200 | -3.8  | N |
| Isoxaflutole                       | 141112-29-0 | ph1v2 | 200 | 14.6  | N | 200 | -1.6  | N | 200 | 2.1   | N |
| Trifloxystrobin                    | 141517-21-7 | ph1v2 | 200 | 7.1   | N | 200 | 4.7   | N | 200 | -21.5 | N |
| Flufenacet                         | 142459-58-3 | ph1v2 | 200 | 5.4   | N | 200 | 16.2  | N | 200 | 31.0  | N |
| Iodosulfuron-methyl-sodium         | 144550-36-7 | ph1v2 | 200 | 6.7   | N | 190 | -14.2 | N | 190 | -26.9 | N |
| Diclosulam                         | 145701-21-9 | ph1v2 | 200 | 58.9  | Y | 200 | 15.4  | N | 200 | 16.7  | N |
| Thiabendazole                      | 148-79-8    | ph1v2 | 200 | -0.2  | N | 200 | -0.5  | N | 200 | -11.8 | N |
| Spirodiclofen                      | 148477-71-8 | ph1v2 | 200 | -1.7  | N | 200 | 12.8  | N | 200 | 5.4   | N |
| Bifenazate                         | 149877-41-8 | ph1v2 | 200 | -9.6  | N | 200 | 4.0   | N | 200 | 5.6   | N |
| Tepraloxydim                       | 149979-41-9 | ph1v2 | 200 | 7.6   | N | 200 | 9.9   | N | 200 | 4.6   | N |
| Napropamide                        | 15299-99-7  | ph1v2 | 200 | 3.5   | N | 200 | 19.3  | N | 200 | -11.1 | N |
| Etoxazole                          | 153233-91-1 | ph1v2 | 200 | 8.9   | N | 200 | -0.2  | N | 200 | 1.0   | N |
| Thiamethoxam                       | 153719-23-4 | ph1v2 | 200 | -8.4  | N | 200 | -3.6  | N | 200 | 0.1   | N |
| Emamectin benzoate                 | 155569-91-8 | ph1v2 | 200 | 100.4 | Y | 200 | 99.1  | Y | 200 | 92.3  | Y |
| Zoxamide                           | 156052-68-5 | ph1v2 | 200 | 93.1  | Y | 200 | 91.5  | Y | 200 | 68.4  | Y |
| Trifluralin                        | 1582-09-8   | ph1v2 | 200 | -2.5  | N | 200 | 2.8   | N | 200 | 10.0  | N |
| Daminozide                         | 1596-84-5   | ph1v2 | 200 | -5.4  | N | 200 | 1.2   | N | 200 | -1.0  | N |
| Alachlor                           | 15972-60-8  | ph1v2 | 200 | 48.6  | N | 200 | 56.8  | Y | 200 | 39.7  | Y |
| Prometon                           | 1610-18-0   | ph1v2 | 200 | 0.9   | N | 200 | -2.5  | N | 200 | -4.2  | N |
| Methoxyfenozone                    | 161050-58-4 | ph1v2 | 200 | 2.2   | N | 190 | 12.8  | N | 190 | 33.3  | N |
| Fenamidone                         | 161326-34-7 | ph1v2 | 200 | 4.7   | N | 200 | 3.3   | N | 200 | -5.7  | N |
| Malaoxon                           | 1634-78-2   | ph1v2 | 200 | 5.6   | Y | 200 | 11.6  | N | 200 | 7.3   | N |
| Ethephon                           | 16672-87-0  | ph1v2 | 200 | 6.7   | N | 200 | 5.3   | N | 200 | -13.6 | N |
| Methomyl                           | 16752-77-5  | ph1v2 | 200 | -1.9  | N | 200 | 5.2   | N | 200 | 1.1   | N |
| Bromoxnil                          | 1689-84-5   | ph1v2 | 160 | 14.5  | N | 160 | 8.5   | N | 160 | 17.5  | N |
| Chloridazon                        | 1698-60-8   | ph1v2 | 200 | 3.4   | N | 200 | 1.2   | N | 200 | -0.1  | N |
| Clopyralid                         | 1702-17-6   | ph1v2 | 200 | 11.4  | N | 200 | 10.0  | N | 200 | 3.1   | N |
| Indoxacarb                         | 173584-44-6 | ph1v2 | 160 | -1.8  | N | 160 | 0.1   | N | 160 | 8.9   | N |

|                                      |             |       |     |      |   |     |      |   |     |       |   |
|--------------------------------------|-------------|-------|-----|------|---|-----|------|---|-----|-------|---|
| Pyraclostrobin                       | 175013-18-0 | ph1v2 | 200 | 3.8  | N | 200 | 11.7 | N | 200 | -12.2 | N |
| PFOS                                 | 1763-23-1   | ph1v2 | 170 | 42.7 | N | 160 | 66.5 | Y | 160 | 9.5   | Y |
| Benomyl                              | 17804-35-2  | ph1v2 | 200 | -0.1 | N | 200 | -2.3 | N | 200 | 6.2   | N |
| Propoxycarbazono-sodium              | 181274-15-7 | ph1v2 | 200 | -8.3 | N | 200 | 1.6  | N | 200 | 4.4   | N |
| Benfluralin                          | 1861-40-1   | ph1v2 | 200 | -0.5 | N | 200 | -2.5 | N | 200 | 0.4   | N |
| Boscalid                             | 188425-85-6 | ph1v2 | 200 | 1.7  | N | 200 | 7.6  | N | 200 | -17.4 | N |
| Flufenpyr-ethyl                      | 188489-07-8 | ph1v2 | 200 | 3.5  | N | 200 | 13.4 | N | 200 | 37.2  | N |
| Chlorothalonil                       | 1897-45-6   | ph1v2 | 200 | 57.3 | Y | 200 | 70.8 | Y | 200 | 83.7  | Y |
| Oryzalin                             | 19044-88-3  | ph1v2 | 200 | 81.9 | Y | 200 | 85.4 | Y | 200 | 52.5  | Y |
| Atrazine                             | 1912-24-9   | ph1v2 | 200 | 5.8  | N | 200 | 15.3 | Y | 200 | 60.9  | Y |
| Dicamba                              | 1918-00-9   | ph1v2 | 200 | 2.5  | N | 200 | 4.3  | N | 200 | -15.9 | N |
| Picloram                             | 1918-02-1   | ph1v2 | 200 | -1.0 | N | 200 | 4.8  | N | 200 | 3.4   | N |
| Nitrapyrin                           | 1929-82-4   | ph1v2 | 200 | -4.0 | N | 200 | 2.7  | N | 200 | 7.9   | N |
| Oxadiazon                            | 19666-30-9  | ph1v2 | 200 | -5.4 | N | 200 | 13.0 | N | 200 | -18.1 | N |
| Trifloxysulfuron-sodium              | 199119-58-9 | ph1v2 | 200 | -0.6 | N | 200 | 20.2 | N | 200 | 11.5  | N |
| Butylate                             | 2008-41-5   | ph1v2 | 200 | 2.2  | N | 200 | 2.8  | N | 200 | -8.0  | N |
| Metribuzin                           | 21087-64-9  | ph1v2 | 200 | -0.7 | N | 200 | 13.5 | N | 200 | 9.7   | N |
| Clothianidin                         | 210880-92-5 | ph1v2 | 200 | 0.8  | N | 200 | -2.4 | N | 200 | 4.5   | N |
| 2-(Thiocyanomethylthio)benzothiazole | 21564-17-0  | ph1v2 | 200 | 4.4  | N | 200 | 43.5 | N | 200 | 22.8  | N |
| Fluometuron                          | 2164-17-2   | ph1v2 | 200 | 1.2  | N | 200 | -1.8 | N | 200 | -2.3  | N |
| Cyanazine                            | 21725-46-2  | ph1v2 | 200 | 1.2  | N | 200 | 21.3 | Y | 200 | 70.3  | Y |
| Penoxsulam                           | 219714-96-2 | ph1v2 | 200 | 5.8  | N | 200 | 7.0  | N | 200 | -3.3  | N |
| Molinate                             | 2212-67-1   | ph1v2 | 200 | -1.9 | N | 200 | 0.9  | N | 200 | -2.9  | N |
| Fenamiphos                           | 22224-92-6  | ph1v2 | 200 | 8.5  | N | 200 | 6.4  | N | 200 | -21.1 | N |
| Bendiocarb                           | 22781-23-3  | ph1v2 | 200 | 2.9  | N | 200 | 3.3  | N | 200 | 7.1   | N |
| Tri-allate                           | 2303-17-5   | ph1v2 | 200 | 0.6  | N | 200 | -0.9 | N | 200 | -20.6 | N |
| Prallethrin                          | 23031-36-9  | ph1v2 | 200 | 38.7 | N | 190 | 55.0 | Y | 190 | 77.7  | Y |
| Phosalone                            | 2310-17-0   | ph1v2 | 200 | 2.4  | N | 200 | 0.5  | N | 200 | -16.8 | N |
| Pirimicarb                           | 23103-98-2  | ph1v2 | 200 | 33.9 | N | 200 | 52.0 | Y | 200 | 89.5  | Y |
| Propargite                           | 2312-35-8   | ph1v2 | 200 | 29.2 | N | 200 | 19.6 | N | 200 | -0.4  | N |
| Oxamyl                               | 23135-22-0  | ph1v2 | 200 | 8.1  | N | 200 | 0.0  | N | 200 | 3.5   | N |
| Butachlor                            | 23184-66-9  | ph1v2 | 200 | 57.5 | Y | 200 | 79.3 | Y | 200 | 66.9  | Y |
| Formetanate hydrochloride            | 23422-53-9  | ph1v2 | 200 | 0.8  | N | 200 | 2.3  | N | 200 | -9.4  | N |
| Thiophanate-methyl                   | 23564-05-8  | ph1v2 | 200 | 32.0 | N | 200 | 7.8  | N | 200 | -20.1 | N |
| Propyzamide                          | 23950-58-5  | ph1v2 | 200 | -0.8 | N | 200 | 1.0  | N | 200 | -8.3  | N |
| Captafol                             | 2425-06-1   | ph1v2 | 200 | 89.0 | Y | 200 | 56.8 | Y | 200 | 55.8  | Y |
| Mepiquat chloride                    | 24307-26-4  | ph1v2 | 200 | -2.7 | N | 200 | 8.6  | N | 200 | -12.7 | N |

|                                                |             |       |     |       |   |     |      |   |     |       |   |
|------------------------------------------------|-------------|-------|-----|-------|---|-----|------|---|-----|-------|---|
| Bentazone                                      | 25057-89-0  | ph1v2 | 200 | 1.7   | N | 200 | 4.7  | N | 200 | -0.4  | N |
| Propamocarb hydrochloride                      | 25606-41-1  | ph1v2 | 200 | -8.5  | N | 200 | 0.7  | N | 200 | 6.2   | N |
| Etridiazole                                    | 2593-15-9   | ph1v2 | 200 | -5.4  | N | 200 | 11.7 | N | 200 | 1.5   | N |
| Ethofumesate                                   | 26225-79-6  | ph1v2 | 200 | 5.7   | N | 200 | 1.4  | N | 200 | -21.0 | N |
| Chloroneb                                      | 2675-77-6   | ph1v2 | 200 | 0.9   | N | 200 | 3.1  | N | 200 | -13.3 | N |
| Norflurazon                                    | 27314-13-2  | ph1v2 | 200 | -1.8  | N | 200 | 6.2  | N | 200 | -17.2 | N |
| Thiobencarb                                    | 28249-77-6  | ph1v2 | 200 | -1.8  | N | 200 | -5.0 | N | 200 | -13.1 | N |
| S-Bioallethrin                                 | 28434-00-6  | ph1v2 | 200 | 5.7   | N | 200 | 42.0 | N | 200 | 47.0  | N |
| Prodiamine                                     | 29091-21-2  | ph1v2 | 200 | 10.6  | N | 190 | 30.6 | Y | 190 | 51.4  | Y |
| Pirimiphos-methyl                              | 29232-93-7  | ph1v2 | 200 | 48.2  | N | 200 | 47.3 | Y | 200 | 54.4  | Y |
| 2,2-Bis(4-hydroxyphenyl)-1,1,1-trichloroethane | 2971-36-0   | ph1v2 | 200 | 38.4  | N | 200 | 64.2 | Y | 200 | 40.1  | Y |
| Methyl parathion                               | 298-00-0    | ph1v2 | 200 | 20.8  | N | 200 | 13.2 | N | 200 | 2.9   | N |
| Disulfoton                                     | 298-04-4    | ph1v2 | 200 | -0.9  | N | 200 | 4.4  | N | 200 | 11.1  | N |
| Naled                                          | 300-76-5    | ph1v2 | 200 | 3.5   | N | 200 | 23.1 | N | 200 | 4.6   | N |
| Acephate                                       | 30560-19-1  | ph1v2 | 200 | 1.9   | N | 200 | 1.0  | N | 200 | -2.9  | N |
| Propetamphos                                   | 31218-83-4  | ph1v2 | 200 | 4.7   | N | 200 | 23.8 | N | 200 | -0.4  | N |
| Bromacil                                       | 314-40-9    | ph1v2 | 200 | -0.2  | N | 200 | 3.0  | N | 200 | -10.0 | N |
| Diuron                                         | 330-54-1    | ph1v2 | 200 | -1.9  | N | 200 | -5.8 | N | 200 | -4.5  | N |
| Linuron                                        | 330-55-2    | ph1v2 | 200 | -1.6  | N | 200 | 0.2  | N | 200 | -23.8 | N |
| Amitraz                                        | 33089-61-1  | ph1v2 | 200 | 24.4  | N | 200 | 47.5 | N | 200 | 19.7  | N |
| Diazinon                                       | 333-41-5    | ph1v2 | 200 | 12.1  | N | 200 | 8.6  | N | 200 | 11.2  | N |
| Asulam                                         | 3337-71-1   | ph1v2 | 200 | 1.4   | N | 200 | -4.3 | N | 200 | -2.7  | N |
| PFOA                                           | 335-67-1    | ph1v2 | 200 | 0.4   | N | 200 | 13.9 | N | 200 | -34.1 | N |
| Butralin                                       | 33629-47-9  | ph1v2 | 200 | -0.3  | N | 200 | 1.3  | N | 200 | -6.8  | N |
| Triclosan                                      | 3380-34-5   | ph1v2 | 200 | 103.0 | Y | 200 | 98.1 | Y | 200 | 102.3 | Y |
| Tebuthiuron                                    | 34014-18-1  | ph1v2 | 200 | 0.1   | N | 200 | 3.8  | N | 200 | -1.5  | N |
| Acetochlor                                     | 34256-82-1  | ph1v2 | 200 | 48.3  | N | 200 | 53.4 | Y | 200 | 41.6  | Y |
| Imazalil                                       | 35554-44-0  | ph1v2 | 200 | 0.6   | N | 200 | 7.5  | N | 200 | -10.7 | N |
| Azamethiphos                                   | 35575-96-3  | ph1v2 | 200 | 37.7  | N | 200 | 28.7 | N | 200 | 22.6  | N |
| Fluoxastrobin                                  | 361377-29-9 | ph1v2 | 200 | 9.0   | N | 200 | -1.5 | Y | 200 | 50.8  | Y |
| Iprodione                                      | 36734-19-7  | ph1v2 | 200 | -0.1  | N | 200 | 11.8 | N | 200 | -5.5  | N |
| Fenpropathrin                                  | 39515-41-8  | ph1v2 | 200 | -2.8  | N | 200 | 9.1  | N | 200 | 8.2   | N |
| Pendimethalin                                  | 40487-42-1  | ph1v2 | 200 | -1.8  | N | 200 | 7.3  | N | 200 | -10.1 | N |
| Profenofos                                     | 41198-08-7  | ph1v2 | 100 | -3.1  | N | 90  | 1.8  | N | 90  | -29.6 | N |
| Cyanamide                                      | 420-04-2    | ph1v2 | 200 | 4.1   | N | 190 | 4.2  | N | 190 | 26.9  | N |
| Isazofos                                       | 42509-80-8  | ph1v2 | 200 | 6.3   | N | 200 | -0.9 | N | 200 | -1.4  | N |
| Oxyfluorfen                                    | 42874-03-3  | ph1v2 | 200 | 6.2   | N | 200 | -0.6 | N | 200 | 7.7   | N |

|                          |            |       |     |       |   |     |      |   |     |       |   |
|--------------------------|------------|-------|-----|-------|---|-----|------|---|-----|-------|---|
| Triadimefon              | 43121-43-3 | ph1v2 | 200 | 2.4   | N | 200 | 6.4  | N | 200 | -9.4  | N |
| Difenzoquat metilsulfate | 43222-48-6 | ph1v2 | 200 | -0.2  | N | 200 | -3.6 | N | 200 | -11.1 | N |
| Monomethyl phthalate     | 4376-18-5  | ph1v2 | 200 | -4.8  | N | 200 | 0.0  | N | 200 | 1.8   | N |
| MEHP                     | 4376-20-9  | ph1v2 | 200 | -2.1  | N | 200 | 8.4  | N | 200 | -7.3  | N |
| Niclosamide              | 50-65-7    | ph1v2 | 100 | 46.1  | N | 100 | 13.7 | N | 100 | -16.4 | N |
| Vinclozolin              | 50471-44-8 | ph1v2 | 200 | -0.3  | N | 200 | 0.7  | N | 200 | 7.7   | N |
| Acifluorfen              | 50594-66-6 | ph1v2 | 200 | 17.0  | N | 200 | 7.2  | N | 200 | 0.0   | N |
| Piperonyl butoxide       | 51-03-6    | ph1v2 | 200 | -2.0  | N | 200 | 0.6  | N | 200 | -5.3  | N |
| Metolachlor              | 51218-45-2 | ph1v2 | 200 | 56.9  | Y | 200 | 31.0 | N | 200 | 21.4  | N |
| Hexazinone               | 51235-04-2 | ph1v2 | 200 | -5.4  | N | 200 | 5.4  | N | 200 | -18.5 | N |
| Diclofop-methyl          | 51338-27-3 | ph1v2 | 200 | -1.5  | N | 200 | 1.5  | N | 200 | -2.9  | N |
| Thidiazuron              | 51707-55-2 | ph1v2 | 200 | 45.1  | N | 200 | 0.4  | N | 200 | -5.9  | N |
| Trichlorfon              | 52-68-6    | ph1v2 | 200 | 1.1   | N | 200 | 1.9  | N | 200 | -1.4  | N |
| Cypermethrin             | 52315-07-8 | ph1v2 | 200 | 4.3   | N | 200 | 5.9  | N | 200 | 16.8  | N |
| Carboxin                 | 5234-68-4  | ph1v2 | 200 | 3.3   | N | 200 | 2.7  | N | 200 | -7.9  | N |
| Permethrin               | 52645-53-1 | ph1v2 | 200 | -1.6  | N | 200 | 7.0  | N | 200 | 3.6   | N |
| Pyrimethanil             | 53112-28-0 | ph1v2 | 200 | -11.2 | N | 200 | -0.4 | N | 200 | 1.9   | N |
| Dazomet                  | 533-74-4   | ph1v2 | 200 | 1.3   | N | 200 | 2.7  | N | 200 | 13.8  | N |
| Chlorethoxyfos           | 54593-83-8 | ph1v2 | 200 | 16.7  | N | 200 | 15.0 | N | 200 | 17.8  | N |
| Fenthion                 | 55-38-9    | ph1v2 | 200 | 74.3  | Y | 200 | 37.7 | N | 200 | 21.8  | N |
| Triadimenol              | 55219-65-3 | ph1v2 | 200 | -0.7  | N | 200 | 11.3 | N | 200 | -20.8 | N |
| Ethalfuralin             | 55283-68-6 | ph1v2 | 200 | 1.3   | N | 200 | 5.4  | N | 200 | 2.9   | N |
| Triclopyr                | 55335-06-3 | ph1v2 | 200 | -9.7  | N | 200 | 9.0  | N | 200 | -12.0 | N |
| Methyl isothiocyanate    | 556-61-6   | ph1v2 | 200 | -1.0  | N | 200 | 0.1  | N | 200 | 3.2   | N |
| Chlorpyrifos-methyl      | 5598-13-0  | ph1v2 | 200 | 30.6  | N | 200 | 21.2 | N | 200 | -9.2  | N |
| Chlorpyrifos oxon        | 5598-15-2  | ph1v2 | 200 | 9.8   | N | 190 | 5.7  | N | 190 | 47.1  | N |
| Parathion                | 56-38-2    | ph1v2 | 200 | -0.7  | N | 200 | 1.9  | N | 200 | -1.6  | N |
| Coumaphos                | 56-72-4    | ph1v2 | 200 | -0.9  | N | 200 | 5.2  | N | 200 | -10.8 | N |
| Clopyralid-olamine       | 57754-85-5 | ph1v2 | 200 | 1.3   | N | 200 | 3.0  | N | 200 | 6.2   | N |
| Metalaxyl                | 57837-19-1 | ph1v2 | 200 | -3.2  | N | 200 | 7.0  | N | 200 | 3.7   | N |
| Cymoxanil                | 57966-95-7 | ph1v2 | 200 | 0.0   | N | 200 | 0.4  | N | 200 | -12.7 | N |
| Lindane                  | 58-89-9    | ph1v2 | 200 | 2.8   | N | 200 | 3.1  | N | 200 | -10.6 | N |
| Allethrin                | 584-79-2   | ph1v2 | 200 | -4.6  | N | 190 | 60.0 | Y | 190 | 72.3  | Y |
| Terbacil                 | 5902-51-2  | ph1v2 | 200 | 2.5   | N | 200 | -2.6 | N | 200 | -20.6 | N |
| Thiodicarb               | 59669-26-0 | ph1v2 | 200 | 3.0   | N | 200 | 2.5  | N | 200 | -20.4 | N |
| Dimethoate               | 60-51-5    | ph1v2 | 200 | 1.0   | N | 200 | 1.0  | N | 200 | -1.0  | N |
| Fenarimol                | 60168-88-9 | ph1v2 | 200 | 1.3   | N | 200 | 13.0 | N | 200 | -23.4 | N |

|                              |            |       |     |      |   |     |      |   |     |       |   |
|------------------------------|------------|-------|-----|------|---|-----|------|---|-----|-------|---|
| Propiconazole                | 60207-90-1 | ph1v2 | 200 | -2.7 | N | 200 | 6.5  | N | 200 | -17.3 | N |
| Oxytetracycline dihydrate    | 6153-64-6  | ph1v2 | 200 | 90.8 | Y | 200 | 61.1 | Y | 200 | 87.5  | Y |
| Dichlorvos                   | 62-73-7    | ph1v2 | 100 | -4.3 | N | 90  | 25.4 | N | 90  | 7.7   | N |
| Flumetralin                  | 62924-70-3 | ph1v2 | 200 | -8.6 | N | 200 | 5.5  | N | 200 | -12.0 | N |
| Carbaryl                     | 63-25-2    | ph1v2 | 200 | -0.4 | N | 200 | 13.4 | N | 200 | -3.0  | N |
| Diquat dibromide monohydrate | 6385-62-2  | ph1v2 | 100 | 0.1  | N | 100 | -0.9 | N | 100 | -9.9  | N |
| Cyromazine                   | 66215-27-8 | ph1v2 | 200 | 2.1  | N | 200 | 2.9  | N | 200 | -10.5 | N |
| Esfenvalerate                | 66230-04-4 | ph1v2 | 200 | 1.4  | N | 200 | 6.4  | N | 200 | 9.0   | N |
| Flutolanil                   | 66332-96-5 | ph1v2 | 200 | 1.3  | N | 190 | 2.1  | N | 190 | -15.2 | N |
| Fenoxaprop-ethyl             | 66441-23-4 | ph1v2 | 200 | 3.2  | N | 200 | 31.1 | Y | 200 | 70.3  | Y |
| Metam-sodium hydrate         | 6734-80-1  | ph1v2 | 200 | -4.2 | N | 200 | 3.8  | N | 200 | 7.1   | N |
| Prochloraz                   | 67747-09-5 | ph1v2 | 200 | 2.8  | N | 200 | 39.4 | N | 200 | 0.2   | N |
| Forchlorfenuron              | 68157-60-8 | ph1v2 | 200 | 14.5 | N | 190 | 20.6 | N | 190 | -21.9 | N |
| Cyfluthrin                   | 68359-37-5 | ph1v2 | 200 | -1.0 | N | 200 | 7.9  | N | 200 | 7.0   | N |
| Triflumizole                 | 68694-11-1 | ph1v2 | 200 | 88.8 | Y | 200 | 94.3 | Y | 200 | 99.1  | Y |
| Monocrotophos                | 6923-22-4  | ph1v2 | 200 | 0.5  | N | 200 | 8.4  | N | 200 | 7.3   | N |
| Buprofezin                   | 69327-76-0 | ph1v2 | 200 | 2.7  | N | 200 | 1.2  | N | 200 | 0.1   | N |
| Fluroxypyr                   | 69377-81-7 | ph1v2 | 200 | 5.1  | N | 200 | -5.7 | N | 200 | -3.1  | N |
| Fluazifop-butyl              | 69806-50-4 | ph1v2 | 200 | 5.0  | N | 200 | 2.2  | N | 200 | 0.1   | N |
| Propanil                     | 709-98-8   | ph1v2 | 200 | 0.5  | N | 200 | 6.4  | N | 200 | -12.2 | N |
| Abamectin                    | 71751-41-2 | ph1v2 | 200 | 3.6  | N | 200 | 12.6 | N | 200 | 28.8  | N |
| Methoxychlor                 | 72-43-5    | ph1v2 | 200 | -2.6 | N | 190 | 2.5  | N | 190 | 1.5   | N |
| Fenoxycarb                   | 72490-01-8 | ph1v2 | 200 | 0.4  | N | 200 | -6.4 | N | 200 | -21.3 | N |
| Prometryn                    | 7287-19-6  | ph1v2 | 200 | -0.5 | N | 200 | 8.4  | N | 200 | 27.8  | N |
| Sethoxydim                   | 74051-80-2 | ph1v2 | 200 | 1.5  | N | 200 | 2.3  | N | 200 | -1.5  | N |
| Bensulide                    | 741-58-2   | ph1v2 | 200 | 3.0  | N | 200 | 20.8 | N | 200 | -20.3 | N |
| Clofentezine                 | 74115-24-5 | ph1v2 | 200 | -2.5 | N | 200 | 2.9  | N | 200 | 6.1   | N |
| Dimethylarsinic acid         | 75-60-5    | ph1v2 | 200 | -1.9 | N | 200 | 7.2  | N | 200 | 1.8   | N |
| EPTC                         | 759-94-4   | ph1v2 | 200 | -3.7 | N | 200 | 1.2  | N | 200 | -18.0 | N |
| Triphenyltin hydroxide       | 76-87-9    | ph1v2 | 200 | -1.0 | N | 200 | 20.4 | N | 200 | 33.7  | N |
| Quizalofop-ethyl             | 76578-14-8 | ph1v2 | 170 | 2.4  | N | 170 | 11.7 | N | 170 | 15.2  | N |
| Paclobutrazol                | 76738-62-0 | ph1v2 | 200 | 1.8  | N | 200 | -0.3 | N | 200 | -11.9 | N |
| Tetramethrin                 | 7696-12-0  | ph1v2 | 200 | 19.3 | N | 200 | 62.8 | Y | 200 | 1.7   | Y |
| Lactofen                     | 77501-63-4 | ph1v2 | 200 | 2.7  | N | 200 | -2.6 | N | 200 | -10.8 | N |
| Mevinphos                    | 7786-34-7  | ph1v2 | 200 | 6.3  | N | 200 | 9.1  | N | 200 | 16.2  | N |
| Tribufos                     | 78-48-8    | ph1v2 | 200 | -1.0 | N | 200 | 9.6  | N | 200 | -4.7  | N |
| Hexythiazox                  | 78587-05-0 | ph1v2 | 200 | -0.5 | N | 200 | 7.6  | N | 200 | -17.2 | N |

|                                |            |       |     |      |   |     |      |   |     |       |   |
|--------------------------------|------------|-------|-----|------|---|-----|------|---|-----|-------|---|
| Fluazifop-P-butyl              | 79241-46-6 | ph1v2 | 200 | -5.1 | N | 200 | 11.1 | N | 200 | 2.1   | N |
| Tefluthrin                     | 79538-32-2 | ph1v2 | 200 | -5.8 | N | 200 | 2.9  | N | 200 | -13.4 | N |
| Fluazinam                      | 79622-59-6 | ph1v2 | 180 | 76.3 | Y | 180 | 91.5 | Y | 180 | 98.2  | Y |
| Hexaconazole                   | 79983-71-4 | ph1v2 | 200 | 3.8  | N | 200 | 6.1  | N | 200 | -18.6 | N |
| Bisphenol A                    | 80-05-7    | ph1v2 | 200 | -0.5 | N | 200 | 4.8  | N | 200 | -27.7 | N |
| Mancozeb                       | 8018-01-7  | ph1v2 | 100 | 45.1 | Y | 100 | 46.3 | Y | 100 | 55.9  | Y |
| Imazapyr                       | 81334-34-1 | ph1v2 | 200 | 1.8  | N | 200 | 5.5  | N | 200 | -1.3  | N |
| Imazaquin                      | 81335-37-7 | ph1v2 | 200 | 1.8  | N | 200 | 7.3  | N | 200 | -2.4  | N |
| Imazethapyr                    | 81335-77-5 | ph1v2 | 200 | -1.3 | N | 200 | 0.1  | N | 200 | -19.2 | N |
| Fluroxypyr-meptyl              | 81406-37-3 | ph1v2 | 200 | 5.7  | N | 200 | 10.9 | N | 200 | -3.9  | N |
| Clomazone                      | 81777-89-1 | ph1v2 | 200 | 1.2  | N | 200 | 1.7  | N | 200 | -7.8  | N |
| Pentachloronitrobenzene        | 82-68-8    | ph1v2 | 200 | -0.7 | N | 200 | 7.8  | N | 200 | 38.9  | N |
| Isoxaben                       | 82558-50-7 | ph1v2 | 200 | 0.8  | N | 200 | 1.3  | N | 200 | -0.9  | N |
| Bifenthrin                     | 82657-04-3 | ph1v2 | 200 | 0.1  | N | 200 | 1.8  | N | 200 | 8.9   | N |
| Rotenone                       | 83-79-4    | ph1v2 | 200 | 33.1 | N | 200 | 16.7 | Y | 200 | 55.2  | Y |
| Ametryn                        | 834-12-8   | ph1v2 | 200 | 0.7  | N | 200 | 12.9 | N | 200 | 25.5  | N |
| Dibutyl phthalate              | 84-74-2    | ph1v2 | 200 | 0.8  | N | 200 | 1.8  | N | 200 | -17.9 | N |
| Quinclorac                     | 84087-01-4 | ph1v2 | 200 | -0.5 | N | 200 | 7.6  | N | 200 | -17.0 | N |
| Flusilazole                    | 85509-19-9 | ph1v2 | 200 | -1.1 | N | 200 | 11.1 | N | 200 | -32.0 | N |
| Azinphos-methyl                | 86-50-0    | ph1v2 | 200 | 66.2 | Y | 200 | 28.9 | N | 200 | 11.5  | N |
| Symclosene                     | 87-90-1    | ph1v2 | 200 | 10.7 | N | 200 | 7.5  | N | 200 | -13.0 | N |
| Flumiclorac-pentyl             | 87546-18-7 | ph1v2 | 200 | 46.5 | N | 200 | 82.8 | Y | 200 | 47.7  | Y |
| Dimethenamid                   | 87674-68-8 | ph1v2 | 200 | 12.7 | N | 200 | 40.1 | N | 200 | 13.8  | N |
| Cinmethylin                    | 87818-31-3 | ph1v2 | 200 | 0.8  | N | 200 | 0.1  | N | 200 | -5.9  | N |
| Tralkoxydim                    | 87820-88-0 | ph1v2 | 200 | -1.9 | N | 200 | 7.2  | N | 200 | -1.8  | N |
| Myclobutanil                   | 88671-89-0 | ph1v2 | 200 | -0.1 | N | 200 | 2.2  | N | 200 | -9.1  | N |
| 2-Phenylphenol                 | 90-43-7    | ph1v2 | 200 | -6.8 | N | 200 | 11.3 | N | 200 | -9.0  | N |
| MCPA                           | 94-74-6    | ph1v2 | 200 | -2.4 | N | 200 | 1.9  | N | 200 | -0.5  | N |
| 2,4-Dichlorophenoxyacetic acid | 94-75-7    | ph1v2 | 200 | -0.7 | N | 200 | -4.1 | N | 200 | -4.9  | N |
| 2,4-DB                         | 94-82-6    | ph1v2 | 200 | 6.5  | N | 200 | 3.8  | N | 200 | -2.0  | N |
| Cyproconazole                  | 94361-06-5 | ph1v2 | 200 | -4.9 | N | 190 | 3.0  | N | 190 | 1.6   | N |
| Methidathion                   | 950-37-8   | ph1v2 | 200 | 32.3 | N | 200 | 14.6 | N | 200 | 4.4   | N |
| Pyriproxyfen                   | 95737-68-1 | ph1v2 | 200 | -2.8 | N | 200 | 9.1  | N | 200 | 5.3   | N |
| Ethylene thiourea              | 96-45-7    | ph1v2 | 200 | 4.0  | N | 200 | 2.7  | N | 200 | -0.6  | N |
| Tebupirimfos                   | 96182-53-5 | ph1v2 | 200 | 3.7  | N | 200 | 9.9  | N | 200 | -1.3  | N |
| Diazoxon                       | 962-58-3   | ph1v2 | 200 | -4.2 | N | 200 | 2.4  | N | 200 | 2.1   | N |
| Pyridaben                      | 96489-71-3 | ph1v2 | 200 | -9.1 | N | 200 | 11.4 | N | 200 | 7.7   | N |



|                                                              |             |       |     |       |   |     |       |   |     |      |   |
|--------------------------------------------------------------|-------------|-------|-----|-------|---|-----|-------|---|-----|------|---|
| Dithiopyr                                                    | 97886-45-8  | ph1v2 | 200 | -0.2  | N | 190 | 2.6   | N | 190 | -5.4 | N |
| Fosthiazate                                                  | 98886-44-3  | ph1v2 | 200 | -8.1  | N | 200 | 2.1   | N | 200 | -1.7 | N |
| Flumetsulam                                                  | 98967-40-9  | ph1v2 | 200 | -1.5  | N | 200 | 1.1   | N | 200 | -3.4 | N |
| Dicloran                                                     | 99-30-9     | ph1v2 | 200 | 3.5   | N | 200 | 12.9  | N | 200 | 10.1 | N |
| Milbemectin (mixture of 70% Milbemcin A4, 30% Milbemycin A3) | NOCAS_34742 | ph1v2 | 200 | 28.6  | N | 190 | 30.1  | Y | 190 | 67.7 | Y |
| 1-Chloro-4-nitrobenzene                                      | 100-00-5    | ph2   | 200 | -0.7  | N | 200 | 2.9   | N | 200 | 4.7  | N |
| 4-Nitroaniline                                               | 100-01-6    | ph2   | 200 | 6.0   | N | 200 | 0.7   | N | 200 | -2.4 | N |
| 4-Nitrophenol                                                | 100-02-7    | ph2   | 200 | -11.7 | N | 200 | -4.1  | N | 200 | -1.4 | N |
| N,N-Diethylethanolamine                                      | 100-37-8    | ph2   | 200 | 2.6   | N | 200 | -1.0  | N | 200 | -4.3 | N |
| Benzyl alcohol                                               | 100-51-6    | ph2   | 200 | 8.7   | N | 200 | -16.4 | N | 200 | -1.9 | N |
| 3-Pyridinecarbonitrile                                       | 100-54-9    | ph2   | 200 | -14.2 | N | 200 | -1.1  | N | 200 | 3.5  | N |
| Methenamine                                                  | 100-97-0    | ph2   | 200 | -8.1  | N | 200 | -6.8  | N | 200 | 4.1  | N |
| alpha-Cyclodextrin                                           | 10016-20-3  | ph2   | 100 | 3.3   | N | 100 | -10.4 | N | 100 | -4.8 | N |
| Triphenyl phosphite                                          | 101-02-0    | ph2   | 200 | 3.0   | N | 200 | 1.1   | N | 200 | 1.0  | N |
| Triclocarban                                                 | 101-20-2    | ph2   | 200 | 1.2   | N | 200 | -3.6  | N | 200 | 0.5  | N |
| N-Phenyl-1,4-benzenediamine                                  | 101-54-2    | ph2   | 200 | 0.8   | N | 200 | 30.8  | N | 200 | 23.3 | N |
| p-Bromodiphenyl ether                                        | 101-55-3    | ph2   | 200 | -3.0  | N | 200 | -0.5  | N | 200 | 3.0  | N |
| 4,4'-Methylenebis(N,N-dimethylaniline)                       | 101-61-1    | ph2   | 200 | -0.6  | N | 200 | 15.4  | N | 200 | 2.0  | N |
| 4,4'-Methylenedianiline                                      | 101-77-9    | ph2   | 200 | 15.1  | N | 200 | 2.5   | N | 200 | 4.8  | N |
| 4,4'-Oxydianiline                                            | 101-80-4    | ph2   | 200 | 9.6   | N | 200 | 7.5   | N | 200 | 1.7  | N |
| 2-Benzylideneoctanal                                         | 101-86-0    | ph2   | 200 | 12.5  | N | 200 | 52.1  | Y | 200 | 65.0 | Y |
| 17beta-Trenbolone                                            | 10161-33-8  | ph2   | 200 | 42.1  | N | 200 | 35.8  | Y | 200 | 58.6 | Y |
| 1,3-Diphenylguanidine                                        | 102-06-7    | ph2   | 200 | 1.7   | N | 200 | -9.6  | N | 200 | 3.0  | N |
| N-Ethyl-3-methylaniline                                      | 102-27-2    | ph2   | 200 | 4.8   | N | 200 | 3.2   | N | 200 | -4.3 | N |
| N,N,N',N'-Tetrakis(2-Hydroxypropyl)ethylenediamine           | 102-60-3    | ph2   | 200 | -2.6  | N | 200 | 4.2   | N | 200 | -1.1 | N |
| Triethanolamine                                              | 102-71-6    | ph2   | 200 | 10.4  | N | 200 | 0.9   | N | 200 | -1.1 | N |
| Triacetin                                                    | 102-76-1    | ph2   | 200 | -1.1  | N | 200 | -3.3  | N | 200 | -1.5 | N |
| Tributylamine                                                | 102-82-9    | ph2   | 200 | 0.3   | N | 200 | 5.4   | N | 200 | 5.4  | N |
| 2,2-Dibromo-3-nitropropionamide                              | 10222-01-2  | ph2   | 200 | 0.0   | N | 200 | 8.2   | N | 200 | 6.6  | N |
| Heptachlor epoxide                                           | 1024-57-3   | ph2   | 200 | -3.1  | N | 200 | -1.0  | N | 200 | 3.5  | N |
| Di(2-ethylhexyl) adipate                                     | 103-23-1    | ph2   | 200 | -0.5  | N | 200 | 6.2   | N | 200 | -0.8 | N |
| Bis(2-ethylhexyl) nonanedioate                               | 103-24-2    | ph2   | 200 | -5.9  | N | 200 | 2.1   | N | 200 | -9.1 | N |
| Azobenzene                                                   | 103-33-3    | ph2   | 200 | -2.4  | N | 200 | -5.3  | N | 200 | 0.4  | N |
| Propylbenzene                                                | 103-65-1    | ph2   | 200 | 3.8   | N | 200 | -1.8  | N | 200 | -0.5 | N |
| N-Ethylaniline                                               | 103-69-5    | ph2   | 200 | 7.4   | N | 200 | 0.1   | N | 200 | 2.7  | N |

|                                     |              |     |     |       |   |     |      |   |     |       |   |
|-------------------------------------|--------------|-----|-----|-------|---|-----|------|---|-----|-------|---|
| Acetaminophen                       | 103-90-2     | ph2 | 200 | -6.0  | N | 200 | 8.5  | N | 200 | 1.6   | N |
| Octyl gallate                       | 1034-01-1    | ph2 | 200 | 97.2  | Y | 200 | 99.4 | Y | 200 | 104.6 | Y |
| 4-Nonylphenol                       | 104-40-5     | ph2 | 200 | 87.9  | Y | 200 | 94.6 | Y | 200 | 99.1  | Y |
| Butylbenzene                        | 104-51-8     | ph2 | 200 | 1.9   | N | 200 | 5.4  | N | 200 | -2.2  | N |
| 5-Heptyldihydro-2(3H)-furanone      | 104-67-6     | ph2 | 200 | -2.1  | N | 200 | 6.0  | N | 200 | -8.8  | N |
| 2-Ethyl-1-hexanol                   | 104-76-7     | ph2 | 200 | 7.4   | N | 200 | -3.7 | N | 200 | -5.0  | N |
| CI-959                              | 104795-68-8  | ph2 | 200 | -10.6 | N | 200 | 8.2  | N | 200 | -8.0  | N |
| Ethyl butyrate                      | 105-54-4     | ph2 | 200 | 0.3   | N | 200 | 0.5  | N | 200 | 0.6   | N |
| Caprolactam                         | 105-60-2     | ph2 | 200 | 3.5   | N | 200 | -2.3 | N | 200 | 3.2   | N |
| 2,4-Dimethylphenol                  | 105-67-9     | ph2 | 200 | 3.3   | N | 200 | 1.5  | N | 200 | 3.9   | N |
| Geranyl acetate                     | 105-87-3     | ph2 | 200 | 7.9   | N | 200 | 4.3  | N | 200 | 14.7  | N |
| Dibutyl hexanedioate                | 105-99-7     | ph2 | 200 | -0.1  | N | 200 | -3.4 | N | 200 | -4.7  | N |
| Tamoxifen                           | 10540-29-1   | ph2 | 100 | 72.0  | Y | 100 | 95.1 | Y | 100 | 3.4   | Y |
| 5HPP-33                             | 105624-86-0  | ph2 | 200 | 3.7   | N | 200 | 29.9 | N | 200 | -4.8  | N |
| Citronellol                         | 106-22-9     | ph2 | 200 | 12.5  | N | 200 | -0.4 | N | 200 | 4.3   | N |
| Geraniol                            | 106-24-1     | ph2 | 200 | 6.1   | N | 200 | 4.3  | N | 200 | 8.5   | N |
| (2Z)-3,7-Dimethylocta-2,6-dien-1-ol | 106-25-2     | ph2 | 200 | 3.2   | N | 200 | 30.5 | N | 200 | 49.8  | N |
| Isopentyl butyrate                  | 106-27-4     | ph2 | 200 | -10.1 | N | 200 | 5.3  | N | 200 | 5.7   | N |
| Ethyl heptanoate                    | 106-30-9     | ph2 | 200 | -1.4  | N | 200 | 1.1  | N | 200 | -0.3  | N |
| 4-Chlorotoluene                     | 106-43-4     | ph2 | 200 | 3.3   | N | 200 | 0.5  | N | 200 | 6.8   | N |
| p-Cresol                            | 106-44-5     | ph2 | 200 | -2.7  | N | 200 | -0.6 | N | 200 | -2.0  | N |
| 1,4-Dichlorobenzene                 | 106-46-7     | ph2 | 200 | -4.5  | N | 200 | 3.4  | N | 200 | -4.8  | N |
| 4-Chloroaniline                     | 106-47-8     | ph2 | 200 | -3.6  | N | 200 | 3.2  | N | 200 | -1.4  | N |
| 4-Methylaniline                     | 106-49-0     | ph2 | 200 | 5.1   | N | 200 | 8.0  | N | 200 | 2.7   | N |
| Dimethyl succinate                  | 106-65-0     | ph2 | 200 | -1.3  | N | 200 | 1.2  | N | 200 | -4.1  | N |
| 4-Vinyl-1-cyclohexene dioxide       | 106-87-6     | ph2 | 200 | 5.4   | N | 200 | 25.0 | N | 200 | 17.7  | N |
| Carbendazim                         | 10605-21-7   | ph2 | 200 | -3.9  | N | 200 | 7.2  | N | 200 | -0.9  | N |
| PharmaGSID_47337                    | 1061517-62-1 | ph2 | 200 | 79.3  | Y | 200 | 56.7 | Y | 200 | 43.7  | Y |
| PharmaGSID_48511                    | 1062243-51-9 | ph2 | 190 | 10.1  | N | 180 | 28.2 | N | 180 | -11.2 | N |
| SAR102608                           | 1068967-96-3 | ph2 | 200 | -5.5  | N | 200 | 3.4  | N | 200 | -10.2 | N |
| 2-Chloroethanol                     | 107-07-3     | ph2 | 200 | -0.8  | N | 200 | -0.6 | N | 200 | 2.7   | N |
| Ethylene glycol                     | 107-21-1     | ph2 | 200 | -5.3  | N | 200 | 4.0  | N | 200 | -0.4  | N |
| 2-Methyl-2,4-pentanediol            | 107-41-5     | ph2 | 210 | -4.7  | N | 200 | 0.2  | N | 200 | -4.6  | N |
| 1,3-Butanediol                      | 107-88-0     | ph2 | 200 | -0.1  | N | 200 | 0.1  | N | 200 | 8.4   | N |
| Butanoic acid                       | 107-92-6     | ph2 | 200 | 3.1   | N | 200 | -1.0 | N | 200 | -4.0  | N |
| 1-Methoxy-2-propanol                | 107-98-2     | ph2 | 200 | 0.4   | N | 190 | -4.5 | N | 190 | 4.9   | N |
| Ro 23-7637                          | 107071-66-9  | ph2 | 200 | -11.5 | N | 200 | 0.6  | N | 200 | -5.1  | N |

|                                    |              |     |     |      |   |     |       |   |     |      |   |
|------------------------------------|--------------|-----|-----|------|---|-----|-------|---|-----|------|---|
| Tebuconazole                       | 107534-96-3  | ph2 | 200 | 7.7  | N | 200 | 3.4   | N | 200 | 1.5  | N |
| SSR103800                          | 1075752-90-7 | ph2 | 185 | -2.2 | N | 180 | 26.0  | N | 180 | -0.6 | N |
| Dimethylaminoethanol               | 108-01-0     | ph2 | 200 | -3.8 | N | 200 | 1.2   | N | 200 | 3.4  | N |
| 4-Methyl-2-pentanol                | 108-11-2     | ph2 | 200 | -5.8 | N | 190 | -1.5  | N | 190 | 3.6  | N |
| 3-Methylaniline                    | 108-44-1     | ph2 | 200 | -2.9 | N | 200 | 0.9   | N | 200 | -5.4 | N |
| 1,3-Benzenediamine                 | 108-45-2     | ph2 | 200 | 4.9  | N | 200 | 2.2   | N | 200 | -4.8 | N |
| Resorcinol                         | 108-46-3     | ph2 | 200 | -2.9 | N | 200 | -4.4  | N | 200 | -3.2 | N |
| Dimethyl malonate                  | 108-59-8     | ph2 | 200 | 4.9  | N | 200 | 2.9   | N | 200 | 5.7  | N |
| 1,3,5-Trimethylbenzene             | 108-67-8     | ph2 | 200 | -1.3 | N | 200 | 1.3   | N | 200 | 2.0  | N |
| Cyanuric acid                      | 108-80-5     | ph2 | 200 | 2.3  | N | 190 | -0.1  | N | 190 | 1.0  | N |
| Cyclohexylamine                    | 108-91-8     | ph2 | 200 | 0.4  | N | 200 | -9.2  | N | 200 | -3.2 | N |
| Cyclohexanol                       | 108-93-0     | ph2 | 200 | 0.1  | N | 200 | -0.6  | N | 200 | 2.6  | N |
| Cyclohexanone                      | 108-94-1     | ph2 | 200 | -0.6 | N | 200 | -16.7 | N | 200 | -1.9 | N |
| Phenol                             | 108-95-2     | ph2 | 200 | -9.9 | N | 200 | 3.9   | N | 200 | -1.9 | N |
| Dibutyl decanedioate               | 109-43-3     | ph2 | 200 | 0.9  | N | 200 | 2.7   | N | 200 | 0.2  | N |
| Methadone hydrochloride            | 1095-90-5    | ph2 | 140 | 7.2  | N | 140 | -3.9  | N | 140 | -0.7 | N |
| Di-tert-butyl peroxide             | 110-05-4     | ph2 | 200 | 0.0  | N | 200 | 0.4   | N | 200 | -5.3 | N |
| N,N'-Methylenebisacrylamide        | 110-26-9     | ph2 | 200 | 8.6  | N | 200 | -0.4  | N | 200 | 3.8  | N |
| Sorbic acid                        | 110-44-1     | ph2 | 200 | 2.7  | N | 200 | 16.3  | N | 200 | 29.6 | N |
| Pentanal                           | 110-62-3     | ph2 | 200 | 4.2  | N | 200 | 4.0   | N | 200 | 4.3  | N |
| 2-Ethoxyethanol                    | 110-80-5     | ph2 | 200 | -5.1 | N | 200 | 5.3   | N | 200 | 0.3  | N |
| Piperazine                         | 110-85-0     | ph2 | 200 | -0.1 | N | 200 | -4.3  | N | 200 | -7.8 | N |
| Mepanipirim                        | 110235-47-7  | ph2 | 200 | 68.1 | Y | 200 | 72.0  | Y | 200 | 78.9 | Y |
| Methyl octanoate                   | 111-11-5     | ph2 | 200 | 1.3  | N | 200 | 0.9   | N | 200 | -1.8 | N |
| Heptanoic acid                     | 111-14-8     | ph2 | 200 | 4.2  | N | 200 | -12.0 | N | 200 | -8.9 | N |
| 2-Ethoxyethyl acetate              | 111-15-9     | ph2 | 200 | 3.7  | N | 200 | -0.8  | N | 200 | 6.8  | N |
| Triethylene glycol diacetate       | 111-21-7     | ph2 | 200 | -5.5 | N | 200 | -2.2  | N | 200 | -2.0 | N |
| Glutaraldehyde                     | 111-30-8     | ph2 | 200 | -3.4 | N | 200 | 40.3  | Y | 200 | 76.3 | Y |
| Diethanolamine                     | 111-42-2     | ph2 | 200 | -6.2 | N | 200 | 9.1   | N | 200 | 5.2  | N |
| Bis(2-chloroethyl) ether           | 111-44-4     | ph2 | 200 | 21.6 | N | 200 | -4.3  | Y | 200 | 9.4  | Y |
| Diethylene glycol                  | 111-46-6     | ph2 | 200 | -3.7 | N | 200 | 5.0   | N | 200 | -2.7 | N |
| Hexanedinitrile                    | 111-69-3     | ph2 | 200 | -2.0 | N | 200 | -10.8 | N | 200 | -1.6 | N |
| 2-Butoxyethanol                    | 111-76-2     | ph2 | 200 | -3.0 | N | 190 | -1.2  | N | 190 | -6.6 | N |
| Diethylene glycol monomethyl ether | 111-77-3     | ph2 | 200 | -7.3 | N | 200 | 8.6   | N | 200 | -1.9 | N |
| Methyl dodecanoate                 | 111-82-0     | ph2 | 200 | -8.5 | N | 200 | 6.2   | N | 200 | -4.9 | N |
| 1-Octanol                          | 111-87-5     | ph2 | 210 | 1.4  | N | 200 | 0.6   | N | 200 | 3.0  | N |
| 2-(2-Ethoxyethoxy)ethanol          | 111-90-0     | ph2 | 200 | 3.7  | N | 200 | -3.7  | N | 200 | 6.3  | N |

|                                         |             |     |     |       |   |     |       |   |     |       |   |
|-----------------------------------------|-------------|-----|-----|-------|---|-----|-------|---|-----|-------|---|
| Bis(2-methoxyethyl) ether               | 111-96-6    | ph2 | 200 | -3.0  | N | 200 | -3.9  | N | 200 | -8.3  | N |
| Ammonium carbamate                      | 1111-78-0   | ph2 | 200 | -4.6  | N | 200 | -5.3  | N | 200 | 2.2   | N |
| Dimethyl glutarate                      | 1119-40-0   | ph2 | 200 | 2.5   | N | 200 | 2.1   | N | 200 | -27.3 | N |
| Dodecyltrimethylammonium chloride       | 112-00-5    | ph2 | 200 | 67.0  | Y | 200 | 81.2  | Y | 200 | 83.6  | Y |
| Nonanoic acid                           | 112-05-0    | ph2 | 200 | -6.2  | N | 200 | 7.4   | N | 200 | -3.4  | N |
| 2-(Hexyloxy)ethanol                     | 112-25-4    | ph2 | 200 | -4.6  | N | 200 | -15.2 | N | 200 | 1.1   | N |
| Triethylene glycol                      | 112-27-6    | ph2 | 200 | -4.4  | N | 200 | 0.2   | N | 200 | 0.6   | N |
| 1-Decanol                               | 112-30-1    | ph2 | 200 | 8.3   | N | 200 | 0.5   | N | 200 | -2.2  | N |
| 2-(2-Butoxyethoxy)ethanol               | 112-34-5    | ph2 | 200 | -7.6  | N | 200 | -2.2  | N | 200 | -8.2  | N |
| 10-Undecenoic acid                      | 112-38-9    | ph2 | 200 | -6.1  | N | 200 | 5.9   | N | 200 | -1.5  | N |
| 1-Undecanol                             | 112-42-5    | ph2 | 200 | 12.3  | N | 200 | 16.1  | Y | 200 | 73.6  | Y |
| Triethylene glycol dimethyl ether       | 112-49-2    | ph2 | 200 | 5.2   | N | 200 | -4.9  | N | 200 | -8.8  | N |
| 2-[2-(2-Ethoxyethoxy)ethoxy]ethanol     | 112-50-5    | ph2 | 200 | 3.9   | N | 200 | -8.0  | N | 200 | 4.9   | N |
| 1-Dodecanol                             | 112-53-8    | ph2 | 200 | 7.4   | N | 200 | 35.2  | Y | 200 | 77.4  | Y |
| 1-Tridecanol                            | 112-70-9    | ph2 | 210 | 4.8   | N | 200 | 36.7  | Y | 200 | 61.7  | Y |
| 1-Tetradecanol                          | 112-72-1    | ph2 | 200 | 5.7   | N | 200 | 2.6   | N | 200 | 37.3  | N |
| Sodium hexyldecyl sulfate               | 1120-01-0   | ph2 | 100 | 100.4 | Y | 90  | 98.3  | Y | 90  | 98.6  | Y |
| Undecane                                | 1120-21-4   | ph2 | 200 | 3.8   | N | 200 | 3.2   | N | 200 | -1.8  | N |
| 1-Tetradecene                           | 1120-36-1   | ph2 | 200 | -0.2  | N | 200 | 2.9   | N | 200 | 2.5   | N |
| 1,3-Propane sultone                     | 1120-71-4   | ph2 | 200 | -2.5  | N | 190 | -0.8  | N | 190 | -2.4  | N |
| Pioglitazone hydrochloride              | 112529-15-4 | ph2 | 200 | 4.9   | N | 200 | 7.5   | N | 200 | -3.1  | N |
| Zenarestat                              | 112733-06-9 | ph2 | 100 | 1.0   | N | 100 | 3.7   | N | 100 | 4.0   | N |
| CP-114271                               | 113734-18-2 | ph2 | 200 | -6.1  | N | 200 | -0.1  | N | 200 | -2.9  | N |
| Erythromycin                            | 114-07-8    | ph2 | 50  | 1.2   | N | 50  | -12.4 | N | 50  | 8.9   | N |
| Anthralin                               | 1143-38-0   | ph2 | 200 | 17.0  | N | 200 | 2.9   | N | 200 | 13.4  | N |
| Chlorendic acid                         | 115-28-6    | ph2 | 200 | -6.8  | N | 200 | 1.1   | N | 200 | 1.6   | N |
| Pentaerythritol                         | 115-77-5    | ph2 | 200 | -4.6  | N | 200 | -3.9  | N | 200 | -6.0  | N |
| Triphenyl phosphate                     | 115-86-6    | ph2 | 200 | 8.3   | N | 200 | 11.3  | N | 200 | -4.5  | N |
| Tris(2-chloroethyl) phosphate           | 115-96-8    | ph2 | 200 | -0.5  | N | 200 | 1.0   | N | 200 | 8.4   | N |
| Tolazamide                              | 1156-19-0   | ph2 | 200 | -7.1  | N | 200 | -5.0  | N | 200 | 5.1   | N |
| 1-(Hydroxymethyl)-5,5-dimethylhydantoin | 116-25-6    | ph2 | 200 | -5.4  | N | 200 | 6.7   | N | 200 | 13.3  | N |
| Quercetin                               | 117-39-5    | ph2 | 200 | 40.6  | N | 200 | -2.8  | N | 200 | -9.8  | N |
| 2-Aminoanthraquinone                    | 117-79-3    | ph2 | 200 | 0.4   | N | 200 | -6.7  | N | 200 | 0.8   | N |
| Diocetyl phthalate                      | 117-84-0    | ph2 | 200 | 0.5   | N | 200 | 4.7   | N | 200 | 9.4   | N |
| Picoxystrobin                           | 117428-22-5 | ph2 | 200 | 2.3   | N | 200 | 5.1   | N | 200 | 6.5   | N |
| 1,3-Dichloro-5,5-dimethylhydantoin      | 118-52-5    | ph2 | 200 | -4.7  | N | 200 | -2.5  | N | 200 | -7.0  | N |
| Maltol                                  | 118-71-8    | ph2 | 210 | -4.3  | N | 200 | 3.4   | N | 200 | 7.1   | N |

|                                   |              |     |     |       |   |     |       |   |     |       |   |
|-----------------------------------|--------------|-----|-----|-------|---|-----|-------|---|-----|-------|---|
| Methyl salicylate                 | 119-36-8     | ph2 | 200 | -3.7  | N | 200 | -2.9  | N | 200 | -9.8  | N |
| Benzophenone                      | 119-61-9     | ph2 | 200 | 6.1   | N | 200 | -0.9  | N | 200 | 1.7   | N |
| 3,3'-Dimethoxybenzidine           | 119-90-4     | ph2 | 200 | -4.2  | N | 200 | 6.8   | N | 200 | 3.5   | N |
| 3,3'-Dimethylbenzidine            | 119-93-7     | ph2 | 200 | 0.6   | N | 200 | 5.6   | N | 200 | -6.1  | N |
| Sodium myristyl sulfate           | 1191-50-0    | ph2 | 200 | 108.1 | Y | 200 | 95.9  | Y | 200 | 67.7  | Y |
| PharmaGSID_48521                  | 1191914-21-2 | ph2 | 180 | -0.8  | N | 180 | -12.0 | N | 180 | 3.5   | N |
| Anthracene                        | 120-12-7     | ph2 | 200 | 2.8   | N | 200 | 5.8   | N | 200 | -0.5  | N |
| Ethylparaben                      | 120-47-8     | ph2 | 200 | 1.0   | N | 200 | 4.7   | N | 200 | -11.4 | N |
| Diethylene glycol dibenzoate      | 120-55-8     | ph2 | 200 | 3.8   | N | 200 | 1.5   | N | 200 | -11.3 | N |
| Dimethyl terephthalate            | 120-61-6     | ph2 | 200 | -1.7  | N | 200 | -1.8  | N | 200 | 1.1   | N |
| 2-Methoxy-5-methylaniline         | 120-71-8     | ph2 | 200 | 6.4   | N | 200 | 4.0   | N | 200 | 6.5   | N |
| Catechol                          | 120-80-9     | ph2 | 200 | -5.2  | N | 200 | 7.6   | N | 200 | 6.8   | N |
| 1,2,4-Trichlorobenzene            | 120-82-1     | ph2 | 200 | -4.4  | N | 200 | -2.7  | N | 200 | 1.0   | N |
| 2,4-Dichlorophenol                | 120-83-2     | ph2 | 200 | -9.1  | N | 200 | 2.5   | N | 200 | -13.6 | N |
| 2,4-Bis(2-methylbutan-2-yl)phenol | 120-95-6     | ph2 | 200 | 101.1 | Y | 200 | 89.3  | Y | 200 | 96.1  | Y |
| 2-tert-Butyl-4-methoxyphenol      | 121-00-6     | ph2 | 200 | -4.4  | N | 200 | 0.9   | N | 200 | -16.5 | N |
| 2,4-Dinitrotoluene                | 121-14-2     | ph2 | 200 | -6.9  | N | 200 | -10.9 | N | 200 | -1.5  | N |
| 4-Hydroxy-3-methoxybenzaldehyde   | 121-33-5     | ph2 | 200 | 3.3   | N | 200 | 1.2   | N | 200 | -0.6  | N |
| N,N-Dimethylaniline               | 121-69-7     | ph2 | 210 | -5.1  | N | 200 | 2.2   | N | 200 | 3.6   | N |
| Propyl gallate                    | 121-79-9     | ph2 | 200 | -8.5  | N | 200 | -2.3  | N | 200 | -3.2  | N |
| 1,3-Benzenedicarboxylic acid      | 121-91-5     | ph2 | 200 | 0.2   | N | 200 | -1.2  | N | 200 | -9.3  | N |
| Bis(2-ethylhexyl) decanedioate    | 122-62-3     | ph2 | 200 | 5.0   | N | 200 | -1.0  | N | 200 | -1.9  | N |
| 1,2-Diphenylhydrazine             | 122-66-7     | ph2 | 200 | -0.3  | N | 200 | -0.1  | N | 200 | -5.5  | N |
| Dodecylbenzene                    | 123-01-3     | ph2 | 200 | -5.3  | N | 200 | -2.4  | N | 200 | -6.4  | N |
| Diethyl butanedioate              | 123-25-1     | ph2 | 200 | -3.3  | N | 200 | 4.0   | N | 200 | -2.9  | N |
| Hydroquinone                      | 123-31-9     | ph2 | 200 | -3.1  | N | 190 | 3.3   | N | 190 | -0.8  | N |
| Myrcene                           | 123-35-3     | ph2 | 200 | 31.5  | N | 200 | 33.3  | N | 200 | 41.7  | N |
| Diacetone alcohol                 | 123-42-2     | ph2 | 200 | -1.4  | N | 200 | -8.8  | N | 200 | 5.3   | N |
| Isopentyl alcohol                 | 123-51-3     | ph2 | 200 | -3.5  | N | 200 | -1.3  | N | 200 | 0.4   | N |
| 3-Methylbutyl acetate             | 123-92-2     | ph2 | 200 | 4.2   | N | 200 | -1.0  | N | 200 | 1.3   | N |
| Candoxatril                       | 123122-55-4  | ph2 | 120 | -2.1  | N | 120 | -7.9  | N | 120 | -0.3  | N |
| Hexanedioic acid                  | 124-04-9     | ph2 | 200 | 3.4   | N | 200 | -3.7  | N | 200 | 3.3   | N |
| Octanoic acid                     | 124-07-2     | ph2 | 200 | 1.6   | N | 200 | 1.7   | N | 200 | 5.2   | N |
| Octanal                           | 124-13-0     | ph2 | 200 | -0.9  | N | 200 | 8.8   | N | 200 | 3.6   | N |
| Decane                            | 124-18-5     | ph2 | 200 | 3.5   | N | 200 | 5.2   | N | 200 | 3.4   | N |
| Triamcinolone                     | 124-94-7     | ph2 | 200 | -2.1  | N | 200 | -0.9  | N | 200 | 7.9   | N |
| Enadoline                         | 124378-77-4  | ph2 | 200 | 5.9   | N | 200 | 1.1   | N | 200 | 5.3   | N |

|                                           |             |     |     |       |   |     |       |   |     |       |   |
|-------------------------------------------|-------------|-----|-----|-------|---|-----|-------|---|-----|-------|---|
| 2-(Hydroxymethyl)-2-nitro-1,3-propanediol | 126-11-4    | ph2 | 200 | -1.8  | N | 200 | 6.8   | N | 200 | 3.8   | N |
| Sucrose octaacetate                       | 126-14-7    | ph2 | 150 | 9.9   | N | 150 | 5.0   | N | 150 | -0.3  | N |
| Tributyl phosphate                        | 126-73-8    | ph2 | 200 | -5.1  | N | 200 | 6.6   | N | 200 | -11.7 | N |
| 2,4,7,9-Tetramethyl-5-decyne-4,7-diol     | 126-86-3    | ph2 | 200 | 1.0   | N | 200 | 2.5   | N | 200 | -6.6  | N |
| Carminic acid                             | 1260-17-9   | ph2 | 200 | 18.8  | N | 200 | 1.1   | N | 200 | 2.5   | N |
| Hydroxyurea                               | 127-07-1    | ph2 | 200 | 4.0   | N | 200 | 2.4   | N | 200 | 5.1   | N |
| alpha-Isomethylionone                     | 127-51-5    | ph2 | 200 | 3.3   | N | 200 | 10.8  | N | 200 | 23.9  | N |
| Zamifenacin                               | 127308-82-1 | ph2 | 200 | -21.5 | N | 200 | 3.1   | N | 200 | 4.3   | N |
| Sodium dimethyldithiocarbamate            | 128-04-1    | ph2 | 200 | -2.6  | N | 200 | 9.2   | N | 200 | 18.8  | N |
| 2,6-Di-tert-butylphenol                   | 128-39-2    | ph2 | 200 | -1.9  | N | 200 | 1.7   | N | 200 | 10.4  | N |
| Pyrene                                    | 129-00-0    | ph2 | 200 | 5.7   | N | 200 | 7.8   | N | 200 | 5.5   | N |
| TNP-470                                   | 129298-91-5 | ph2 | 60  | 71.4  | Y | 60  | 39.7  | N | 60  | 31.1  | N |
| Fabesetron hydrochloride                  | 129299-90-7 | ph2 | 180 | 26.0  | N | 170 | 33.4  | N | 170 | -5.7  | N |
| Fulvestrant                               | 129453-61-8 | ph2 | 100 | -4.6  | N | 100 | 3.9   | N | 100 | 5.6   | N |
| Sodium xylenesulfonate                    | 1300-72-7   | ph2 | 200 | -1.5  | N | 200 | 5.2   | N | 200 | -5.5  | N |
| Terbufos                                  | 13071-79-9  | ph2 | 200 | -11.3 | N | 200 | 9.4   | N | 200 | 0.3   | N |
| Diallyl phthalate                         | 131-17-9    | ph2 | 200 | 2.5   | N | 200 | 2.6   | N | 200 | -1.2  | N |
| Dipentyl phthalate                        | 131-18-0    | ph2 | 200 | 6.8   | N | 200 | 1.9   | N | 200 | -1.3  | N |
| 2,2',4,4'-Tetrahydroxybenzophenone        | 131-55-5    | ph2 | 200 | 27.2  | N | 200 | 11.0  | N | 200 | -0.4  | N |
| Dibenzofuran                              | 132-64-9    | ph2 | 200 | -7.6  | N | 200 | 11.1  | N | 200 | -5.0  | N |
| Rifampicin                                | 13292-46-1  | ph2 | 120 | 9.7   | N | 120 | 12.3  | N | 120 | 22.7  | N |
| Chloramben                                | 133-90-4    | ph2 | 200 | 5.0   | N | 200 | 0.2   | N | 200 | 3.7   | N |
| Flutamide                                 | 13311-84-7  | ph2 | 200 | 33.3  | N | 200 | 8.0   | N | 200 | -11.9 | N |
| Sorbitan, mono-(9Z)-9-octadecenoate       | 1338-43-8   | ph2 | 200 | 7.9   | N | 200 | 27.9  | N | 200 | -4.5  | N |
| Sodium L-ascorbate                        | 134-03-2    | ph2 | 200 | 3.7   | N | 200 | 2.2   | N | 200 | 10.9  | N |
| Methyl 2-aminobenzoate                    | 134-20-3    | ph2 | 200 | 9.6   | N | 200 | -4.1  | N | 200 | -4.4  | N |
| CP-085958                                 | 134002-60-1 | ph2 | 100 | 2.8   | N | 100 | 14.4  | N | 100 | 9.5   | N |
| 2-Naphthalenol                            | 135-19-3    | ph2 | 200 | 3.6   | N | 200 | -1.8  | N | 200 | -3.3  | N |
| CP-100829                                 | 135080-03-4 | ph2 | 100 | 53.7  | Y | 100 | 11.1  | N | 100 | -19.2 | N |
| Butyl benzoate                            | 136-60-7    | ph2 | 200 | 1.0   | N | 200 | -1.3  | N | 200 | -1.0  | N |
| 4-Hexylresorcinol                         | 136-77-6    | ph2 | 200 | 65.5  | Y | 200 | 18.3  | N | 200 | 11.1  | N |
| FR130739                                  | 136042-19-8 | ph2 | 200 | -4.7  | N | 200 | 19.5  | N | 200 | -11.7 | N |
| TDCPP                                     | 13674-87-8  | ph2 | 200 | 14.8  | N | 200 | 8.6   | N | 200 | -11.9 | N |
| Ziram                                     | 137-30-4    | ph2 | 200 | -4.7  | N | 200 | 26.8  | N | 200 | 45.3  | N |
| FR900409                                  | 138472-01-2 | ph2 | 200 | -2.6  | N | 200 | 7.2   | N | 200 | 19.7  | N |
| Nitrilotriacetic acid                     | 139-13-9    | ph2 | 180 | 1.2   | N | 180 | -12.4 | N | 180 | 5.9   | N |
| SB202235                                  | 139149-55-6 | ph2 | 200 | -4.9  | N | 200 | 4.6   | N | 200 | 0.1   | N |

|                                          |             |     |     |       |   |     |       |   |     |       |   |
|------------------------------------------|-------------|-----|-----|-------|---|-----|-------|---|-----|-------|---|
| Volinanserin                             | 139290-65-6 | ph2 | 200 | 4.6   | N | 200 | -0.7  | N | 200 | -5.1  | N |
| Darbufelone mesylate                     | 139340-56-0 | ph2 | 100 | 88.1  | Y | 100 | 58.0  | Y | 100 | 72.2  | Y |
| Fenamino-sulf                            | 140-56-7    | ph2 | 200 | 28.1  | N | 200 | 22.9  | N | 200 | 41.7  | N |
| Pentamidine isethionate                  | 140-64-7    | ph2 | 180 | -6.0  | N | 170 | 8.8   | N | 170 | -9.2  | N |
| 4-(1,1,3,3-Tetramethylbutyl)phenol       | 140-66-9    | ph2 | 200 | 104.9 | Y | 200 | 87.5  | Y | 200 | 103.8 | Y |
| Tannic acid                              | 1401-55-4   | ph2 | 60  | 98.5  | Y | 60  | 66.8  | Y | 60  | 64.4  | Y |
| Diisobutyl adipate                       | 141-04-8    | ph2 | 200 | -4.9  | N | 200 | 4.5   | N | 200 | -15.6 | N |
| Ethanolamine                             | 141-43-5    | ph2 | 200 | -0.1  | N | 200 | -3.3  | N | 200 | -3.2  | N |
| Hexanoic acid                            | 142-62-1    | ph2 | 200 | 0.6   | N | 200 | -9.2  | N | 200 | 1.3   | N |
| Kepone                                   | 143-50-0    | ph2 | 200 | 97.0  | Y | 200 | 98.7  | Y | 200 | 88.1  | Y |
| Diisopropyl methylphosphonate            | 1445-75-6   | ph2 | 200 | -7.3  | N | 200 | -4.7  | N | 200 | -2.5  | N |
| Endothal                                 | 145-73-3    | ph2 | 200 | 4.1   | N | 200 | 8.4   | N | 200 | 2.4   | N |
| CP-122721                                | 145742-28-5 | ph2 | 200 | 12.7  | N | 200 | 33.8  | N | 200 | -6.7  | N |
| FR145237                                 | 146011-65-6 | ph2 | 180 | -3.6  | N | 150 | -10.8 | N | 150 | 2.7   | N |
| Tributyltin chloride                     | 1461-22-9   | ph2 | 200 | 1.9   | N | 200 | 26.2  | N | 200 | 6.3   | N |
| Diphenhydramine hydrochloride            | 147-24-0    | ph2 | 200 | 14.3  | N | 200 | -19.2 | N | 200 | -13.0 | N |
| Bisphenol AF                             | 1478-61-1   | ph2 | 200 | 31.5  | N | 200 | 80.4  | Y | 200 | 50.0  | Y |
| 8-Hydroxyquinoline                       | 148-24-3    | ph2 | 200 | -6.3  | N | 200 | 5.5   | N | 200 | 3.5   | N |
| 2-Mercaptobenzothiazole                  | 149-30-4    | ph2 | 200 | 88.2  | Y | 200 | 72.9  | Y | 200 | 45.8  | Y |
| 2-Ethylhexanoic acid                     | 149-57-5    | ph2 | 200 | -2.1  | N | 200 | -2.6  | N | 200 | 1.2   | N |
| PharmaGSID_47259                         | 149062-75-9 | ph2 | 100 | -0.3  | N | 100 | -12.4 | N | 100 | 0.7   | N |
| FR150011                                 | 149413-74-1 | ph2 | 200 | 94.0  | Y | 200 | 85.6  | Y | 200 | 76.4  | Y |
| 4-Aminobenzoic acid                      | 150-13-0    | ph2 | 200 | -3.9  | N | 200 | 2.2   | N | 200 | -4.2  | N |
| Monuron                                  | 150-68-5    | ph2 | 200 | 7.0   | N | 200 | -3.6  | N | 200 | 0.5   | N |
| Sodium dodecyl sulfate                   | 151-21-3    | ph2 | 200 | 42.2  | N | 200 | 74.0  | Y | 200 | 81.1  | Y |
| FR140423                                 | 151506-44-4 | ph2 | 200 | -3.8  | N | 200 | -5.5  | N | 200 | -8.3  | N |
| Diclofenac sodium                        | 15307-79-6  | ph2 | 200 | -9.3  | N | 200 | 2.9   | N | 200 | 3.2   | N |
| Benodanil                                | 15310-01-7  | ph2 | 200 | -8.1  | N | 200 | -5.6  | N | 200 | -8.8  | N |
| 6-Thioguanine                            | 154-42-7    | ph2 | 200 | 3.2   | N | 200 | 6.6   | N | 200 | 11.7  | N |
| SR271425                                 | 155990-20-8 | ph2 | 200 | -11.4 | N | 200 | 2.0   | N | 200 | 3.8   | N |
| 1-Benzylquinolinium chloride             | 15619-48-4  | ph2 | 200 | -2.0  | N | 200 | 11.4  | N | 200 | 3.4   | N |
| Carbofuran                               | 1563-66-2   | ph2 | 200 | 0.0   | N | 200 | 1.6   | N | 200 | -1.5  | N |
| CP-105696                                | 158081-99-3 | ph2 | 100 | -10.4 | N | 100 | 48.8  | N | 100 | 6.0   | N |
| Cariporide mesylate                      | 159138-81-5 | ph2 | 150 | -5.2  | N | 140 | 8.9   | N | 140 | 9.8   | N |
| UK-156819                                | 162706-14-1 | ph2 | 200 | -6.8  | N | 200 | 3.9   | N | 200 | -3.8  | N |
| Aldicarb oxime                           | 1646-75-9   | ph2 | 200 | -11.0 | N | 200 | 9.2   | N | 200 | -8.4  | N |
| Diisononyl cyclohexane-1,2-dicarboxylate | 166412-78-8 | ph2 | 200 | 2.7   | N | 200 | 2.9   | N | 200 | 9.4   | N |

|                                         |             |     |     |       |   |     |       |   |     |       |   |
|-----------------------------------------|-------------|-----|-----|-------|---|-----|-------|---|-----|-------|---|
| Celecoxib                               | 169590-42-5 | ph2 | 200 | 75.1  | Y | 200 | 75.1  | Y | 200 | 88.9  | Y |
| CP-283097                               | 171866-31-2 | ph2 | 100 | -3.1  | N | 100 | -0.6  | N | 100 | 9.0   | N |
| FR167356                                | 174185-16-1 | ph2 | 200 | 2.2   | N | 200 | 10.5  | N | 200 | -16.1 | N |
| PharmaGSID_47261                        | 177785-47-6 | ph2 | 200 | 43.1  | N | 200 | 1.8   | N | 200 | 1.7   | N |
| CJ-013790                               | 179465-71-5 | ph2 | 100 | 12.8  | N | 100 | 58.8  | Y | 100 | 50.4  | Y |
| SB236057A                               | 180084-01-9 | ph2 | 170 | -2.9  | N | 170 | 36.3  | N | 170 | 15.6  | N |
| 4-Octylphenol                           | 1806-26-4   | ph2 | 200 | 91.8  | Y | 200 | 93.8  | Y | 200 | 95.2  | Y |
| SR144190                                | 181640-09-5 | ph2 | 200 | -6.3  | N | 200 | 5.7   | N | 200 | 2.2   | N |
| Nitrofen                                | 1836-75-5   | ph2 | 200 | 2.2   | N | 200 | 5.9   | N | 200 | 6.0   | N |
| Octabenzene                             | 1843-05-6   | ph2 | 200 | -15.1 | N | 200 | 0.3   | N | 200 | 0.8   | N |
| Carabersat                              | 184653-84-7 | ph2 | 200 | 1.1   | N | 190 | -0.1  | N | 190 | -3.6  | N |
| Chlorthal-dimethyl                      | 1861-32-1   | ph2 | 200 | -3.8  | N | 190 | -1.3  | N | 190 | 5.4   | N |
| Ingliborib                              | 186392-65-4 | ph2 | 200 | 11.2  | N | 200 | 11.4  | N | 200 | -7.5  | N |
| Trelanserlin                            | 189003-92-7 | ph2 | 200 | 2.7   | N | 200 | -7.8  | N | 200 | -2.7  | N |
| Vernolate                               | 1929-77-7   | ph2 | 200 | -5.1  | N | 200 | -0.2  | N | 200 | -5.3  | N |
| FD&C Yellow 5                           | 1934-21-0   | ph2 | 190 | 1.7   | N | 180 | 4.8   | N | 180 | -3.2  | N |
| CP-409092                               | 194098-25-4 | ph2 | 200 | 0.5   | N | 200 | 10.6  | N | 200 | 2.9   | N |
| tert-Butylhydroquinone                  | 1948-33-0   | ph2 | 200 | 23.6  | N | 200 | 31.6  | N | 200 | 40.5  | N |
| Farglitazar                             | 196808-45-4 | ph2 | 180 | 100.4 | Y | 170 | 100.1 | Y | 170 | 97.9  | Y |
| UK-333747                               | 197077-55-7 | ph2 | 200 | -0.4  | N | 200 | -13.2 | N | 200 | 4.4   | N |
| 4-Heptylphenol                          | 1987-50-4   | ph2 | 200 | 99.5  | Y | 200 | 97.5  | Y | 200 | 103.0 | Y |
| CP-401387                               | 199171-88-5 | ph2 | 100 | -1.5  | N | 100 | -0.4  | N | 100 | -3.3  | N |
| SB243213A                               | 200940-23-4 | ph2 | 180 | -5.4  | N | 180 | 6.7   | N | 180 | 17.5  | N |
| 3,3'-Dimethoxybenzidine dihydrochloride | 20325-40-0  | ph2 | 200 | -9.0  | N | 200 | 4.5   | N | 200 | 10.5  | N |
| UK-337312                               | 203942-49-8 | ph2 | 200 | 103.4 | Y | 200 | 102.6 | Y | 200 | 99.7  | Y |
| Benzo(b)fluoranthene                    | 205-99-2    | ph2 | 200 | -5.8  | N | 100 | 1.6   | N | 100 | -2.4  | N |
| Oxytetracycline hydrochloride           | 2058-46-0   | ph2 | 200 | 75.9  | Y | 200 | 29.1  | Y | 200 | 55.1  | Y |
| Perfluoroundecanoic acid                | 2058-94-8   | ph2 | 200 | 104.7 | Y | 100 | 96.1  | Y | 100 | 91.3  | Y |
| Fluoranthene                            | 206-44-0    | ph2 | 200 | -4.2  | N | 200 | -1.0  | N | 200 | 3.9   | N |
| CI-1029                                 | 207736-05-8 | ph2 | 200 | 63.4  | Y | 200 | 12.5  | N | 200 | 39.8  | N |
| Acenaphthylene                          | 208-96-8    | ph2 | 200 | -5.0  | N | 200 | -1.7  | N | 200 | 0.4   | N |
| EPN                                     | 2104-64-5   | ph2 | 200 | -5.9  | N | 200 | 3.8   | N | 200 | 2.5   | N |
| CP-456773                               | 210826-40-7 | ph2 | 200 | -3.3  | N | 200 | 9.1   | N | 200 | -0.5  | N |
| Tridecafluorohexylethyl methacrylate    | 2144-53-8   | ph2 | 200 | -7.6  | N | 200 | -3.6  | N | 200 | -1.4  | N |
| CP-457677                               | 214535-77-0 | ph2 | 200 | 9.6   | N | 200 | 4.3   | N | 200 | -0.1  | N |
| UK-343664                               | 215297-27-1 | ph2 | 100 | -2.5  | N | 100 | -0.5  | N | 100 | -2.4  | N |
| Tributyltin methacrylate                | 2155-70-6   | ph2 | 200 | -4.6  | N | 200 | 38.1  | N | 200 | 14.8  | N |



|                                         |             |     |     |       |   |     |       |   |     |       |   |
|-----------------------------------------|-------------|-----|-----|-------|---|-----|-------|---|-----|-------|---|
| Pentachloropyridine                     | 2176-62-7   | ph2 | 200 | 27.9  | N | 200 | 55.7  | Y | 200 | 93.5  | Y |
| SB281832                                | 219790-72-4 | ph2 | 200 | 4.3   | N | 200 | -1.7  | N | 200 | 1.3   | N |
| CP-457920                               | 220860-50-4 | ph2 | 200 | -5.2  | N | 200 | -0.5  | N | 200 | 5.9   | N |
| Fandosentan potassium salt              | 221246-12-4 | ph2 | 100 | 15.3  | N | 100 | 9.4   | N | 100 | 4.2   | N |
| SR146131 trifluoroacetate (1:1)         | 221671-62-1 | ph2 | 100 | 13.8  | N | 100 | 31.0  | Y | 100 | 97.1  | Y |
| 1,5-Naphthalenediamine                  | 2243-62-1   | ph2 | 200 | 8.9   | N | 200 | 23.6  | N | 200 | 48.1  | N |
| Hexane-1,6-diyl dibenzoate              | 22915-73-7  | ph2 | 200 | -7.2  | N | 200 | -0.8  | N | 200 | -8.6  | N |
| CP-544439                               | 230954-09-3 | ph2 | 200 | 4.5   | N | 200 | 0.5   | N | 200 | 1.7   | N |
| Clotrimazole                            | 23593-75-1  | ph2 | 200 | -9.0  | N | 200 | 41.9  | N | 200 | 12.1  | N |
| 1-[3-(Triethoxysilyl)propyl]urea        | 23779-32-0  | ph2 | 200 | 1.6   | N | 200 | 1.3   | N | 200 | 0.9   | N |
| Mirex                                   | 2385-85-5   | ph2 | 200 | 2.3   | N | 200 | -4.6  | N | 200 | -3.1  | N |
| Dexamethasone sodium phosphate          | 2392-39-4   | ph2 | 200 | 8.0   | N | 200 | 2.4   | N | 200 | 5.5   | N |
| 2,3,6-Trimethylphenol                   | 2416-94-6   | ph2 | 200 | 2.6   | N | 200 | -3.2  | N | 200 | -5.3  | N |
| Diocetyl succinate                      | 2432-87-3   | ph2 | 200 | 5.3   | N | 100 | -3.5  | N | 100 | 2.0   | N |
| 4-Cyclohexylcyclohexanol                | 2433-14-9   | ph2 | 200 | 8.2   | N | 200 | 0.6   | N | 200 | -14.6 | N |
| Triglycidyl isocyanurate                | 2451-62-9   | ph2 | 200 | 2.2   | N | 200 | 2.8   | N | 200 | 9.2   | N |
| Tridemorph                              | 24602-86-6  | ph2 | 200 | -4.2  | N | 200 | -7.2  | N | 200 | 1.8   | N |
| CJ-013610                               | 249296-43-3 | ph2 | 200 | 2.5   | N | 200 | 3.3   | N | 200 | -2.4  | N |
| Sodium dodecylbenzenesulfonate          | 25155-30-0  | ph2 | 200 | 103.9 | Y | 200 | 105.5 | Y | 200 | 95.8  | Y |
| Dipropylene glycol                      | 25265-71-8  | ph2 | 200 | 0.6   | N | 200 | -6.2  | N | 200 | -2.1  | N |
| Monobenzyl phthalate                    | 2528-16-7   | ph2 | 200 | -6.1  | N | 200 | 1.0   | N | 200 | 7.8   | N |
| Besonprodil                             | 253450-09-8 | ph2 | 200 | -3.2  | N | 200 | 1.6   | N | 200 | -3.3  | N |
| Tripropylene glycol monomethyl ether    | 25498-49-1  | ph2 | 200 | -5.7  | N | 200 | -3.1  | N | 200 | -9.1  | N |
| Dicyclohexyl disulfide                  | 2550-40-5   | ph2 | 200 | 7.0   | N | 200 | -9.2  | N | 200 | -2.4  | N |
| Allura Red C.I.16035                    | 25956-17-6  | ph2 | 200 | 12.3  | N | 200 | 0.2   | N | 200 | 2.4   | N |
| N,N-Dimethyldecylamine oxide            | 2605-79-0   | ph2 | 200 | -0.6  | N | 200 | 3.0   | N | 200 | 13.0  | N |
| 5-Chloro-2-methyl-3(2H)-isothiazolone   | 26172-55-4  | ph2 | 200 | 24.0  | N | 200 | 7.4   | N | 200 | 0.5   | N |
| CP-532623                               | 261947-38-0 | ph2 | 200 | -10.7 | N | 200 | -0.1  | N | 200 | -0.2  | N |
| HMR1426                                 | 262376-75-0 | ph2 | 200 | 65.4  | Y | 200 | 41.1  | Y | 200 | 64.4  | Y |
| 1,2-Benzisothiazolin-3-one              | 2634-33-5   | ph2 | 200 | 11.8  | N | 200 | -4.5  | N | 200 | 2.3   | N |
| GW473178E methyl benzene sulphonic acid | 263553-33-9 | ph2 | 140 | 8.5   | N | 130 | 2.9   | N | 130 | -5.6  | N |
| SSR146977                               | 264618-44-2 | ph2 | 50  | -14.1 | N | 50  | 16.3  | N | 50  | -3.2  | N |
| Octhilinone                             | 26530-20-1  | ph2 | 210 | 65.3  | Y | 200 | 84.1  | Y | 200 | 99.7  | Y |
| Sodium azide                            | 26628-22-8  | ph2 | 200 | 3.0   | N | 200 | 1.7   | N | 200 | -2.0  | N |
| 2,3-Diaminotoluene                      | 2687-25-4   | ph2 | 200 | 9.4   | N | 200 | 21.6  | N | 200 | 15.9  | N |
| 1-Dodecyl-2-pyrrolidinone               | 2687-96-9   | ph2 | 200 | 92.5  | Y | 200 | 78.6  | Y | 200 | 88.2  | Y |
| 2,3-Benzofuran                          | 271-89-6    | ph2 | 200 | -0.4  | N | 200 | -0.3  | N | 200 | -0.3  | N |

|                                                    |             |     |     |       |   |     |       |   |     |       |   |
|----------------------------------------------------|-------------|-----|-----|-------|---|-----|-------|---|-----|-------|---|
| Di(propylene glycol) dibenzoate                    | 27138-31-4  | ph2 | 200 | 3.7   | N | 200 | 11.9  | N | 200 | -2.5  | N |
| Dodecylbenzenesulfonic acid                        | 27176-87-0  | ph2 | 200 | 106.2 | Y | 200 | 106.0 | Y | 200 | 102.5 | Y |
| Diisodecyl hexanedioate                            | 27178-16-1  | ph2 | 200 | -14.3 | N | 200 | 6.6   | N | 200 | 2.2   | N |
| Dodecylbenzene sulfonate triethanolamine(1:1)      | 27323-41-7  | ph2 | 180 | 102.0 | Y | 170 | 93.4  | Y | 170 | 94.7  | Y |
| 2,4-Bis(1-methyl-1-phenylethyl)phenol              | 2772-45-4   | ph2 | 200 | 25.4  | N | 200 | 70.9  | Y | 200 | 68.6  | Y |
| FD&C Yellow 6                                      | 2783-94-0   | ph2 | 200 | 7.0   | N | 200 | 7.5   | N | 200 | 9.6   | N |
| PFOS-K                                             | 2795-39-3   | ph2 | 190 | 57.0  | Y | 190 | 63.5  | Y | 190 | 8.3   | Y |
| 4,4',4''-Ethane-1,1,1-triyltriphenol               | 27955-94-8  | ph2 | 200 | 8.4   | N | 200 | 10.8  | N | 200 | -1.7  | N |
| 5-Amino-2-methylphenol                             | 2835-95-2   | ph2 | 200 | 26.0  | N | 200 | 28.9  | N | 200 | 42.1  | N |
| 1H-1,2,4-Triazole                                  | 288-88-0    | ph2 | 200 | 1.5   | N | 200 | 10.4  | N | 200 | -2.4  | N |
| Surinabant                                         | 288104-79-0 | ph2 | 200 | -10.2 | N | 200 | 1.6   | N | 200 | 16.5  | N |
| CP-607366                                          | 289716-94-5 | ph2 | 200 | 8.7   | N | 200 | 1.8   | N | 200 | -6.6  | N |
| CP-634384                                          | 290352-28-2 | ph2 | 200 | -0.9  | N | 200 | 8.3   | N | 200 | -15.2 | N |
| UK-373911                                          | 291305-06-1 | ph2 | 200 | 45.9  | N | 200 | 85.1  | Y | 200 | 84.1  | Y |
| Chlorpyrifos                                       | 2921-88-2   | ph2 | 200 | 1.1   | N | 200 | 6.9   | N | 200 | 20.9  | N |
| PFBS-K                                             | 29420-49-3  | ph2 | 200 | -11.2 | N | 200 | 8.0   | N | 200 | -7.2  | N |
| Triethoxyoctylsilane                               | 2943-75-1   | ph2 | 200 | -4.6  | N | 200 | -2.7  | N | 200 | -1.2  | N |
| Isooctyl acrylate                                  | 29590-42-9  | ph2 | 200 | 71.1  | Y | 200 | 94.8  | Y | 200 | 77.0  | Y |
| Phorate                                            | 298-02-2    | ph2 | 200 | 3.4   | N | 200 | 3.0   | N | 200 | 1.3   | N |
| Carbamazepine                                      | 298-46-4    | ph2 | 200 | 0.1   | N | 200 | -1.1  | N | 200 | 1.3   | N |
| SSR180711                                          | 298198-52-4 | ph2 | 200 | 1.9   | N | 200 | -1.7  | N | 200 | 2.5   | N |
| all-trans-Retinoic acid                            | 302-79-4    | ph2 | 200 | 21.0  | N | 200 | 57.3  | Y | 200 | 73.3  | Y |
| N,N,N-Trimethyl(oxiran-2-yl)methanaminium chloride | 3033-77-0   | ph2 | 200 | -1.3  | N | 200 | 2.4   | N | 200 | -1.0  | N |
| 3'-Azido-3'-deoxythymidine                         | 30516-87-1  | ph2 | 200 | -4.7  | N | 200 | -2.1  | N | 200 | 2.6   | N |
| Stavudine                                          | 3056-17-5   | ph2 | 200 | -0.7  | N | 200 | 3.3   | N | 200 | 4.9   | N |
| PFHxA                                              | 307-24-4    | ph2 | 200 | -4.2  | N | 200 | -2.6  | N | 200 | 1.7   | N |
| Aldrin                                             | 309-00-2    | ph2 | 200 | -2.1  | N | 200 | 9.3   | N | 200 | 2.4   | N |
| MK-578                                             | 313994-79-5 | ph2 | 180 | 2.1   | N | 170 | 20.7  | N | 170 | 0.3   | N |
| Octrizole                                          | 3147-75-9   | ph2 | 200 | 6.3   | N | 200 | -5.0  | N | 200 | 3.3   | N |
| beta-Hexachlorocyclohexane                         | 319-85-7    | ph2 | 200 | -0.1  | N | 200 | 5.1   | N | 200 | 5.5   | N |
| Dibromoacetonitrile                                | 3252-43-5   | ph2 | 200 | 2.4   | N | 200 | -1.2  | N | 200 | 3.7   | N |
| Procymidone                                        | 32809-16-8  | ph2 | 200 | -2.5  | N | 200 | 0.3   | Y | 200 | -5.6  | Y |
| 2,2-Bis(bromomethyl)-1,3-propanediol               | 3296-90-0   | ph2 | 200 | -12.1 | N | 200 | 2.9   | N | 200 | -4.8  | N |
| MK-547                                             | 331623-06-4 | ph2 | 200 | -4.6  | N | 200 | 12.1  | N | 200 | 2.8   | N |
| Tris(2-ethylhexyl) trimellitate                    | 3319-31-1   | ph2 | 200 | -7.5  | N | 200 | 2.1   | N | 200 | 3.0   | N |
| 4-Pentylaniline                                    | 33228-44-3  | ph2 | 200 | 3.4   | N | 200 | 6.9   | N | 200 | -8.4  | N |

|                                            |             |     |     |       |   |     |       |   |     |       |   |
|--------------------------------------------|-------------|-----|-----|-------|---|-----|-------|---|-----|-------|---|
| Decanoic acid                              | 334-48-5    | ph2 | 210 | -18.9 | N | 200 | 4.4   | N | 200 | -5.7  | N |
| PFDA                                       | 335-76-2    | ph2 | 200 | 102.4 | Y | 200 | 103.1 | Y | 200 | 93.9  | Y |
| Hexanedioic acid, diisononyl ester         | 33703-08-1  | ph2 | 200 | -6.1  | N | 200 | -6.5  | N | 200 | 0.5   | N |
| Isopropalin                                | 33820-53-0  | ph2 | 200 | -1.2  | N | 200 | 3.9   | N | 200 | 6.4   | N |
| SSR69071                                   | 344930-95-6 | ph2 | 50  | 48.9  | N | 50  | 68.9  | Y | 50  | 88.2  | Y |
| Dipropylene glycol monomethyl ether        | 34590-94-8  | ph2 | 200 | -1.4  | N | 200 | 3.2   | N | 200 | 2.6   | N |
| PharmaGSID_47263                           | 349495-42-7 | ph2 | 200 | -0.2  | N | 200 | -0.3  | N | 200 | -6.9  | N |
| Butam                                      | 35256-85-0  | ph2 | 200 | -5.2  | N | 200 | -8.0  | N | 200 | -4.9  | N |
| CP-612372                                  | 353280-07-6 | ph2 | 200 | -0.3  | N | 200 | 3.6   | N | 200 | 2.7   | N |
| Elzasonan                                  | 361343-19-3 | ph2 | 200 | 19.5  | N | 200 | 83.6  | Y | 200 | -1.3  | Y |
| 1-Hexadecanol                              | 36653-82-4  | ph2 | 100 | -0.5  | N | 100 | -2.4  | Y | 100 | 0.3   | Y |
| CP-728663                                  | 368832-42-2 | ph2 | 200 | -9.6  | N | 200 | 6.1   | N | 200 | 6.5   | N |
| 3-Phenoxybenzoic acid                      | 3739-38-6   | ph2 | 200 | -10.8 | N | 200 | -13.1 | N | 200 | 1.8   | N |
| Perfluoroheptanoic acid                    | 375-85-9    | ph2 | 200 | 4.2   | N | 200 | 1.7   | N | 200 | -19.2 | N |
| PFNA                                       | 375-95-1    | ph2 | 200 | 1.6   | N | 200 | 38.2  | N | 200 | -8.0  | N |
| Sodium (2-pyridylthio)-N-oxide             | 3811-73-2   | ph2 | 200 | 0.3   | N | 200 | 10.6  | N | 200 | 4.0   | N |
| PFOA, ammonium salt                        | 3825-26-1   | ph2 | 200 | -3.7  | N | 200 | 0.0   | Y | 200 | -15.2 | Y |
| 2,6,10-Trimethyl-2,6,10-triazaundecane     | 3855-32-1   | ph2 | 200 | -7.1  | N | 200 | -9.2  | N | 200 | 3.8   | N |
| PFHS-K                                     | 3871-99-6   | ph2 | 200 | -8.3  | N | 200 | -9.8  | N | 200 | -20.8 | N |
| UK-416244                                  | 402910-27-4 | ph2 | 200 | 8.5   | N | 200 | 17.5  | N | 200 | -13.7 | N |
| Methyl dopa sesquihydrate                  | 41372-08-1  | ph2 | 200 | 10.3  | N | 200 | 8.7   | N | 200 | 35.5  | N |
| 4,4'-Sulfonylbis[2-(prop-2-en-1-yl)phenol] | 41481-66-7  | ph2 | 200 | 44.4  | N | 200 | 74.7  | Y | 200 | 58.3  | Y |
| Sulfuramid                                 | 4151-50-2   | ph2 | 190 | -13.3 | N | 190 | 31.1  | N | 190 | 25.2  | N |
| (E)-Anethole                               | 4180-23-8   | ph2 | 200 | 3.0   | N | 200 | 1.7   | N | 200 | 3.0   | N |
| Cyproterone acetate                        | 427-51-0    | ph2 | 200 | 1.1   | N | 200 | 15.2  | Y | 200 | 87.2  | Y |
| Cladribine                                 | 4291-63-8   | ph2 | 200 | 1.5   | N | 100 | 1.6   | N | 100 | 2.5   | N |
| SAR 150640                                 | 433212-21-6 | ph2 | 190 | 51.6  | Y | 180 | 64.0  | Y | 180 | 35.8  | Y |
| Nelivaptan                                 | 439687-69-1 | ph2 | 200 | 13.2  | N | 200 | 10.1  | N | 200 | 6.1   | N |
| Sodium dehydroacetate                      | 4418-26-2   | ph2 | 200 | 0.6   | N | 200 | 0.5   | N | 200 | -0.3  | N |
| Cycloamine                                 | 4449-51-8   | ph2 | 200 | -6.1  | N | 200 | -13.3 | N | 200 | -0.2  | N |
| CP-671305                                  | 445295-04-5 | ph2 | 200 | -0.5  | N | 200 | 5.1   | N | 200 | 10.0  | N |
| N-Methyldioctylamine                       | 4455-26-9   | ph2 | 200 | -5.1  | N | 200 | 5.7   | N | 200 | 7.6   | N |
| Genistein                                  | 446-72-0    | ph2 | 200 | 90.1  | Y | 200 | 10.2  | N | 200 | -2.5  | N |
| Azathioprine                               | 446-86-6    | ph2 | 200 | 15.4  | N | 190 | 14.0  | N | 190 | 24.7  | N |
| PharmaGSID_48510                           | 460081-99-6 | ph2 | 200 | -11.0 | N | 200 | 3.1   | N | 200 | -8.7  | N |
| Aplaviroc hydrochloride                    | 461023-63-2 | ph2 | 200 | -15.3 | N | NA  | NA    | N | NA  | NA    | N |
| SSR 240612                                 | 464930-42-5 | ph2 | 130 | -21.4 | N | 90  | -0.6  | N | 90  | -4.5  | N |

|                             |             |     |     |       |   |     |       |   |     |       |   |
|-----------------------------|-------------|-----|-----|-------|---|-----|-------|---|-----|-------|---|
| Ilepatril                   | 473289-62-2 | ph2 | 200 | 13.5  | N | 200 | -2.7  | N | 200 | 7.6   | N |
| PHA-00543613                | 478149-53-0 | ph2 | 200 | 5.0   | N | 200 | -4.0  | N | 200 | 4.5   | N |
| AVE3295                     | 478263-98-8 | ph2 | 170 | 13.0  | N | 170 | 11.0  | N | 170 | 15.7  | N |
| Cotinine                    | 486-56-6    | ph2 | 200 | -3.9  | N | 200 | 5.4   | N | 200 | 9.1   | N |
| Daidzein                    | 486-66-8    | ph2 | 200 | 74.1  | Y | 200 | -3.7  | N | 200 | 5.4   | N |
| 1,5,9-Cyclododecatriene     | 4904-61-4   | ph2 | 200 | 0.4   | N | 200 | -4.2  | N | 200 | -1.7  | N |
| Fenofibrate                 | 49562-28-9  | ph2 | 200 | 2.0   | N | 200 | 1.0   | N | 200 | -4.6  | N |
| 3,4-Diaminotoluene          | 496-72-0    | ph2 | 200 | 17.9  | N | 190 | 31.5  | N | 190 | 6.8   | N |
| Corticosterone              | 50-22-6     | ph2 | 200 | -1.8  | N | 200 | 1.9   | N | 200 | -5.0  | N |
| 17beta-Estradiol            | 50-28-2     | ph2 | 200 | -3.7  | N | 200 | 0.1   | N | 200 | -2.5  | N |
| p,p'-DDT                    | 50-29-3     | ph2 | 200 | -4.6  | N | 200 | 2.7   | N | 200 | -0.8  | N |
| Thalidomide                 | 50-35-1     | ph2 | 200 | 1.7   | N | 200 | -5.4  | N | 200 | -3.7  | N |
| Clomiphene citrate (1:1)    | 50-41-9     | ph2 | 200 | 66.9  | Y | 200 | 94.6  | Y | 200 | -2.5  | Y |
| Aspirin                     | 50-78-2     | ph2 | 200 | -5.0  | N | 200 | 1.7   | N | 200 | 3.9   | N |
| PD-0333941                  | 501027-49-2 | ph2 | 200 | -10.6 | N | 200 | 25.3  | N | 200 | -3.0  | N |
| Pirinixic acid              | 50892-23-4  | ph2 | 200 | -7.7  | N | 180 | -3.8  | N | 180 | 5.4   | N |
| 5-Fluorouracil              | 51-21-8     | ph2 | 200 | -0.8  | N | 200 | -3.2  | N | 200 | 0.3   | N |
| Tiratricol                  | 51-24-1     | ph2 | 200 | -23.1 | N | 2   | 0.5   | N | 2   | -11.0 | N |
| 2,4-Dinitrophenol           | 51-28-5     | ph2 | 200 | -4.9  | N | 200 | 1.6   | N | 200 | 0.7   | N |
| Isoproterenol hydrochloride | 51-30-9     | ph2 | 200 | 4.3   | N | 200 | -1.9  | N | 200 | 5.5   | N |
| 6-Propyl-2-thiouracil       | 51-52-5     | ph2 | 200 | 101.9 | Y | 200 | 1.7   | N | 200 | 4.0   | N |
| Urethane                    | 51-79-6     | ph2 | 200 | -0.5  | N | 200 | -1.2  | N | 200 | -3.8  | N |
| Chlorobenzilate             | 510-15-6    | ph2 | 200 | 3.4   | N | 200 | 9.8   | N | 200 | 10.5  | N |
| Spiro lactone               | 52-01-7     | ph2 | 200 | 8.0   | N | 200 | 84.4  | Y | 200 | 25.3  | Y |
| Bronopol                    | 52-51-7     | ph2 | 200 | 4.3   | N | 200 | 0.8   | N | 200 | 6.1   | N |
| Haloperidol                 | 52-86-8     | ph2 | 200 | 3.3   | N | 200 | 21.2  | N | 200 | 0.8   | N |
| 5alpha-Dihydrotestosterone  | 521-18-6    | ph2 | 200 | 13.6  | N | 200 | -5.7  | N | 200 | -6.5  | N |
| 4-Chlorobenzotrithloride    | 5216-25-1   | ph2 | 200 | 22.4  | N | 200 | 47.0  | Y | 200 | 55.6  | Y |
| 2,4,6-Trimethylphenol       | 527-60-6    | ph2 | 200 | -2.9  | N | 200 | 3.2   | N | 200 | -5.9  | N |
| PHA-00568487                | 527680-56-4 | ph2 | 200 | -5.3  | N | 200 | -11.3 | N | 200 | 1.0   | N |
| 1,2-Dinitrobenzene          | 528-29-0    | ph2 | 200 | 32.4  | N | 200 | 66.8  | Y | 200 | 78.0  | Y |
| Hydroxyflutamide            | 52806-53-8  | ph2 | 200 | 1.5   | N | 200 | 1.6   | N | 200 | -6.7  | N |
| Prednisone                  | 53-03-2     | ph2 | 200 | -0.1  | N | 200 | 12.5  | N | 200 | 47.4  | N |
| Estrone                     | 53-16-7     | ph2 | 200 | -1.0  | N | 200 | 0.7   | N | 200 | -7.5  | N |
| Indomethacin                | 53-86-1     | ph2 | 200 | -18.2 | N | 200 | 4.6   | N | 200 | -8.4  | N |
| 1-Hydroxypyrene             | 5315-79-7   | ph2 | 200 | 60.1  | Y | 200 | 71.3  | Y | 200 | 91.0  | Y |
| 2-Chloroacetophenone        | 532-27-4    | ph2 | 200 | 2.7   | N | 200 | 13.5  | N | 200 | -2.6  | N |

|                                    |            |     |     |       |   |     |      |   |     |       |   |
|------------------------------------|------------|-----|-----|-------|---|-----|------|---|-----|-------|---|
| Sodium benzoate                    | 532-32-1   | ph2 | 200 | -3.8  | N | 200 | 1.5  | N | 200 | 1.3   | N |
| 2-Methyl-4,6-dinitrophenol         | 534-52-1   | ph2 | 200 | -9.1  | N | 200 | 6.2  | N | 200 | 6.9   | N |
| 4-(2-Methylbutan-2-yl)cyclohexanol | 5349-51-9  | ph2 | 200 | 3.6   | N | 200 | -2.0 | N | 200 | -11.0 | N |
| Triisononyl trimellitate           | 53894-23-8 | ph2 | 200 | -1.9  | N | 200 | 3.2  | N | 200 | 0.7   | N |
| 3,7-Dimethyl-2,6-octadienal        | 5392-40-5  | ph2 | 200 | 3.6   | N | 200 | 36.7 | Y | 200 | 67.2  | Y |
| Nicotine                           | 54-11-5    | ph2 | 200 | -2.7  | N | 190 | 0.3  | N | 190 | 1.4   | N |
| 4-Aminofolic acid                  | 54-62-6    | ph2 | 200 | 18.7  | N | 200 | 20.3 | N | 200 | 14.5  | N |
| Isoniazid                          | 54-85-3    | ph2 | 90  | 8.1   | N | 80  | 1.2  | N | 80  | -2.0  | N |
| 1,3-Dichlorobenzene                | 541-73-1   | ph2 | 200 | -13.9 | N | 200 | -5.1 | N | 200 | 0.7   | N |
| Hexadecane                         | 544-76-3   | ph2 | 200 | -11.2 | N | 200 | 1.7  | N | 200 | 4.0   | N |
| Gentian Violet                     | 548-62-9   | ph2 | 200 | -4.2  | N | 200 | 31.9 | Y | 200 | 61.7  | Y |
| Tamoxifen citrate                  | 54965-24-1 | ph2 | 180 | 95.1  | Y | 180 | 97.3 | Y | 180 | 33.0  | Y |
| N-Nitrosodiethylamine              | 55-18-5    | ph2 | 200 | 7.2   | N | 200 | -6.5 | N | 200 | -3.0  | N |
| Busulfan                           | 55-98-1    | ph2 | 200 | -9.1  | N | 200 | 0.4  | N | 200 | 2.2   | N |
| Carbosulfan                        | 55285-14-8 | ph2 | 200 | 23.9  | N | 200 | 15.8 | N | 200 | 12.2  | N |
| Dimethipin                         | 55290-64-7 | ph2 | 200 | -0.4  | N | 200 | 3.7  | N | 200 | 9.9   | N |
| 4,4'-Bipyridine                    | 553-26-4   | ph2 | 200 | -4.6  | N | 200 | 1.0  | N | 200 | -1.9  | N |
| Glycidol                           | 556-52-5   | ph2 | 200 | -8.4  | N | 200 | 12.2 | N | 200 | 1.2   | N |
| Octamethylcyclotetrasiloxane       | 556-67-2   | ph2 | 200 | -3.5  | N | 200 | 3.8  | N | 200 | -3.0  | N |
| 6-Methyl-2-thiouracil              | 56-04-2    | ph2 | 200 | 80.5  | Y | 200 | 8.3  | N | 200 | 3.2   | N |
| Diethylstilbestrol                 | 56-53-1    | ph2 | 200 | -5.7  | N | 200 | 45.6 | N | 200 | 28.4  | N |
| Benz(a)anthracene                  | 56-55-3    | ph2 | 200 | 46.3  | N | 200 | 27.2 | Y | 200 | 57.7  | Y |
| Glycerol                           | 56-81-5    | ph2 | 200 | -0.6  | N | 200 | 2.0  | N | 200 | 2.5   | N |
| Ethion                             | 563-12-2   | ph2 | 200 | 5.0   | N | 200 | 27.0 | N | 200 | 15.0  | N |
| Octadecanoic acid                  | 57-11-4    | ph2 | 100 | -3.5  | N | 100 | 15.0 | N | 100 | 18.6  | N |
| Urea                               | 57-13-6    | ph2 | 200 | -5.0  | N | 200 | 6.8  | N | 200 | -4.2  | N |
| Phenobarbital sodium               | 57-30-7    | ph2 | 200 | -3.8  | N | 200 | 0.4  | N | 200 | -4.5  | N |
| 5,5-Diphenylhydantoin              | 57-41-0    | ph2 | 200 | -1.5  | N | 200 | 5.3  | N | 200 | -5.5  | N |
| Sucrose                            | 57-50-1    | ph2 | 200 | -5.9  | N | 200 | -1.6 | N | 200 | -3.6  | N |
| 1,2-Propylene glycol               | 57-55-6    | ph2 | 200 | 0.1   | N | 200 | -3.3 | N | 200 | -0.2  | N |
| 17alpha-Ethinylestradiol           | 57-63-6    | ph2 | 200 | 7.2   | N | 200 | 5.5  | N | 200 | -15.2 | N |
| Chlordane                          | 57-74-9    | ph2 | 200 | 11.5  | N | 200 | 45.0 | N | 200 | 49.9  | N |
| Progesterone                       | 57-83-0    | ph2 | 200 | -6.3  | N | 200 | 2.2  | N | 200 | -17.3 | N |
| Testosterone propionate            | 57-85-2    | ph2 | 200 | 0.9   | N | 0.2 | -1.0 | N | 0.2 | -0.9  | N |
| 17alpha-Estradiol                  | 57-91-0    | ph2 | 200 | -8.7  | N | 200 | 0.5  | N | 200 | -8.4  | N |
| 7,12-Dimethylbenz(a)anthracene     | 57-97-6    | ph2 | 200 | 1.9   | N | 200 | 10.6 | N | 200 | 11.3  | N |
| 2,6-Dimethylphenol                 | 576-26-1   | ph2 | 200 | -5.3  | N | 200 | 6.6  | N | 200 | -3.1  | N |

|                          |             |     |     |       |   |     |       |   |     |       |   |
|--------------------------|-------------|-----|-----|-------|---|-----|-------|---|-----|-------|---|
| Docusate sodium          | 577-11-7    | ph2 | 200 | 106.2 | Y | 200 | 98.1  | Y | 200 | 90.4  | Y |
| 2,6-Diethylaniline       | 579-66-8    | ph2 | 200 | -4.4  | N | 200 | 2.0   | N | 200 | -8.1  | N |
| Caffeine                 | 58-08-2     | ph2 | 200 | -4.4  | N | 200 | -5.9  | N | 200 | -1.3  | N |
| Pyrimethamine            | 58-14-0     | ph2 | 200 | 1.6   | N | 200 | 4.9   | N | 200 | -7.6  | N |
| 17-Methyltestosterone    | 58-18-4     | ph2 | 200 | 0.8   | N | 200 | 1.5   | N | 200 | -3.8  | N |
| Theophylline             | 58-55-9     | ph2 | 200 | -5.1  | N | 200 | -14.7 | N | 200 | 2.7   | N |
| Hydrochlorothiazide      | 58-93-5     | ph2 | 200 | 0.1   | N | 200 | -2.7  | N | 200 | -1.2  | N |
| Benzyloctyl adipate      | 58394-64-2  | ph2 | 200 | 1.1   | N | 200 | 2.5   | N | 200 | 0.4   | N |
| 4-Amino-1,2,4-triazole   | 584-13-4    | ph2 | 200 | -4.5  | N | 200 | 0.1   | N | 200 | -4.1  | N |
| Toluene-2,4-diisocyanate | 584-84-9    | ph2 | 200 | 0.7   | N | 200 | 4.5   | N | 200 | 3.0   | N |
| 4-Ethyl-1-yn-3-ol        | 5877-42-9   | ph2 | 200 | 0.6   | N | 200 | 49.9  | N | 200 | 34.6  | N |
| PharmaGSID_48506         | 588941-45-1 | ph2 | 200 | -5.2  | N | 200 | -4.3  | N | 200 | 4.2   | N |
| Methotrexate             | 59-05-2     | ph2 | 200 | 1.3   | N | 200 | 4.2   | N | 200 | 8.9   | N |
| Folic acid               | 59-30-3     | ph2 | 200 | -4.4  | N | 200 | 7.0   | N | 200 | -1.5  | N |
| 4-Chloro-3-methylphenol  | 59-50-7     | ph2 | 200 | -1.3  | N | 200 | 1.7   | N | 200 | -15.0 | N |
| Nicotinic acid           | 59-67-6     | ph2 | 200 | 5.8   | N | 190 | -0.9  | N | 190 | 6.0   | N |
| Nitrofurazone            | 59-87-0     | ph2 | 200 | 2.0   | N | 200 | -2.0  | N | 200 | 19.7  | N |
| Terbutylazine            | 5915-41-3   | ph2 | 200 | -2.3  | N | 200 | 14.1  | Y | 200 | 50.7  | Y |
| Fluridone                | 59756-60-4  | ph2 | 200 | 0.6   | N | 200 | -5.7  | N | 200 | -9.8  | N |
| 4-Cumylphenol            | 599-64-4    | ph2 | 200 | 9.6   | N | 200 | 5.2   | N | 200 | -7.5  | N |
| Sulfasalazine            | 599-79-1    | ph2 | 200 | 82.4  | Y | 200 | 3.8   | N | 200 | -6.8  | N |
| 4-Aminoazobenzene        | 60-09-3     | ph2 | 200 | -5.0  | N | 200 | 4.2   | N | 200 | -5.3  | N |
| Acetamide                | 60-35-5     | ph2 | 200 | 0.4   | N | 200 | 1.4   | N | 200 | 9.9   | N |
| Tetracycline             | 60-54-8     | ph2 | 200 | 64.4  | Y | 200 | 36.4  | Y | 200 | 50.1  | Y |
| Methimazole              | 60-56-0     | ph2 | 200 | -13.4 | N | 200 | 1.3   | N | 200 | 0.6   | N |
| Dieldrin                 | 60-57-1     | ph2 | 200 | -4.4  | N | 190 | 13.8  | N | 190 | 22.8  | N |
| 2,3-Dinitrotoluene       | 602-01-7    | ph2 | 140 | 28.1  | N | 140 | 53.7  | Y | 140 | 76.4  | Y |
| 2,6-Dinitrotoluene       | 606-20-2    | ph2 | 200 | -0.8  | N | 200 | -0.8  | N | 200 | -8.7  | N |
| tert-Butyl perbenzoate   | 614-45-9    | ph2 | 200 | 2.1   | N | 200 | -4.9  | N | 200 | 8.9   | N |
| 4-Nitrobenzoic acid      | 62-23-7     | ph2 | 200 | 1.0   | N | 200 | 1.3   | N | 200 | 4.2   | N |
| Phenylmercuric acetate   | 62-38-4     | ph2 | 200 | 23.5  | N | 200 | 26.4  | N | 200 | 5.1   | N |
| N-Nitrosodimethylamine   | 62-75-9     | ph2 | 200 | 1.9   | N | 200 | 0.3   | N | 200 | -1.8  | N |
| N-Nitrosodipropylamine   | 621-64-7    | ph2 | 200 | -6.3  | N | 190 | -0.6  | N | 190 | -0.6  | N |
| Piragliatin              | 625114-41-2 | ph2 | 50  | -5.1  | N | 50  | -9.3  | N | 50  | 0.1   | N |
| 3-Bromo-1-propanol       | 627-18-9    | ph2 | 200 | 1.3   | N | 200 | 0.9   | N | 200 | -2.0  | N |
| Dimethyl adipate         | 627-93-0    | ph2 | 200 | -0.8  | N | 200 | -12.3 | N | 200 | 3.2   | N |
| Pentyl acetate           | 628-63-7    | ph2 | 200 | -1.1  | N | 200 | -1.0  | N | 200 | -0.1  | N |

|                                                                        |             |     |              |       |   |              |       |   |              |       |   |
|------------------------------------------------------------------------|-------------|-----|--------------|-------|---|--------------|-------|---|--------------|-------|---|
| Pentadecane                                                            | 629-62-9    | ph2 | 200          | -1.0  | N | 200          | 3.8   | N | 200          | 2.7   | N |
| 1-Pentadecanol                                                         | 629-76-5    | ph2 | 200          | -0.1  | N | 200          | 0.2   | N | 200          | 4.9   | N |
| 4-Androstene-3,17-dione                                                | 63-05-8     | ph2 | 200          | 1.1   | N | 200          | -2.5  | N | 200          | -9.0  | N |
| 3-Hydroxyfluorene                                                      | 6344-67-8   | ph2 | 200          | -13.4 | N | 200          | 14.8  | N | 200          | -1.5  | N |
| Nilutamide                                                             | 63612-50-0  | ph2 | 200          | -3.9  | N | 200          | 2.6   | N | 200          | -0.1  | N |
| Clofibrate                                                             | 637-07-0    | ph2 | 200          | 3.5   | N | 200          | -0.7  | N | 200          | 0.2   | N |
| Sodium erythorbate (1:1)                                               | 6381-77-7   | ph2 | 200          | -5.8  | N | 200          | 1.8   | N | 200          | 6.7   | N |
| Acetic acid                                                            | 64-19-7     | ph2 | 200          | -15.8 | N | 200          | 3.4   | N | 200          | 0.2   | N |
| Diethyl sulfate                                                        | 64-67-5     | ph2 | 200          | 0.3   | N | 200          | 0.2   | N | 200          | -1.8  | N |
| Colchicine                                                             | 64-86-8     | ph2 | 200          | -3.1  | N | 200          | -0.6  | N | 200          | 0.4   | N |
| Bis(2-ethylhexyl) terephthalate                                        | 6422-86-2   | ph2 | 200          | -3.6  | N | 200          | 0.5   | N | 200          | -5.2  | N |
| 1,2-Benzenedicarboxaldehyde                                            | 643-79-8    | ph2 | 200          | 82.2  | Y | 200          | 87.6  | Y | 200          | 93.4  | Y |
| 3,3,4,4,5,5,6,6,7,7,8,8,8-Tridecafluorooctan-1-ol                      | 647-42-7    | ph2 | 200          | -11.8 | N | 200          | -25.3 | N | 200          | -42.7 | N |
| AVE2865                                                                | 648917-13-9 | ph2 | 100          | -15.0 | N | 100          | 1.7   | N | 100          | -2.0  | N |
| Pyridoxine                                                             | 65-23-6     | ph2 | 200          | -15.6 | N | 200          | 5.8   | N | 200          | 3.1   | N |
| Benzoic acid                                                           | 65-85-0     | ph2 | 200          | -0.6  | N | 200          | -1.6  | N | 200          | 3.2   | N |
| Ketoconazole                                                           | 65277-42-1  | ph2 | 200          | -2.8  | N | 200          | 24.3  | N | 200          | 17.6  | N |
| Methyl methanesulfonate                                                | 66-27-3     | ph2 | 200          | -1.5  | N | 200          | 6.9   | N | 200          | 2.2   | N |
| Cycloheximide                                                          | 66-81-9     | ph2 | 200          | -4.6  | N | 200          | -1.1  | N | 200          | 2.5   | N |
| Pentane-1,5-diyl dibenzoate                                            | 6624-73-3   | ph2 | 200          | 3.1   | N | 200          | 5.9   | N | 200          | 0.8   | N |
| Adipic acid, polypropyleneglycol, laurate                              | 66456-53-9  | ph2 | 100<br>µg/ml | 2.5   | N | 100<br>µg/ml | -9.1  | N | 100<br>µg/ml | -7.7  | N |
| CP-863187                                                              | 668981-02-0 | ph2 | 200          | -3.9  | N | 200          | 4.9   | N | 200          | 19.3  | N |
| Nitrofurantoin                                                         | 67-20-9     | ph2 | 200          | 7.9   | N | 200          | -0.1  | N | 200          | 11.1  | N |
| PD 0343701                                                             | 676116-04-4 | ph2 | 200          | -4.6  | N | 200          | 4.0   | N | 200          | 3.3   | N |
| 1,1,2,2-Tetrahydroperfluoro-1-decanol                                  | 678-39-7    | ph2 | 200          | -0.2  | N | 200          | 4.4   | N | 200          | 2.4   | N |
| N,N-Dimethylformamide                                                  | 68-12-2     | ph2 | 200          | -0.9  | N | 200          | 5.3   | N | 200          | 1.5   | N |
| Norethindrone                                                          | 68-22-4     | ph2 | 200          | 4.9   | N | 200          | 11.3  | N | 200          | 33.0  | N |
| Retinol                                                                | 68-26-8     | ph2 | 210          | 25.1  | N | 200          | 51.6  | Y | 200          | 72.1  | Y |
| 17alpha-Hydroxyprogesterone                                            | 68-96-2     | ph2 | 200          | -1.1  | N | 200          | -2.1  | N | 200          | -6.3  | N |
| 4-Hydroxytamoxifen                                                     | 68392-35-8  | ph2 | 130          | 103.7 | Y | 120          | 103.3 | Y | 120          | 28.3  | Y |
| 2,2,4-Trimethyl-1,3-pentanediol diisobutyrate                          | 6846-50-0   | ph2 | 200          | -1.2  | N | 200          | 2.9   | N | 200          | 1.4   | N |
| 1,2-Benzenedicarboxylic acid, di-C9-11-branched alkyl esters, C10-rich | 68515-49-1  | ph2 | 200          | -6.3  | N | 200          | 4.2   | N | 200          | 10.6  | N |
| PharmaGSID_48519                                                       | 686756-87-6 | ph2 | 200          | -10.4 | N | 200          | 23.5  | Y | 200          | 1.3   | Y |
| Chlorpromazine hydrochloride                                           | 69-09-0     | ph2 | 200          | 39.0  | N | 200          | 72.0  | Y | 200          | 45.1  | Y |
| D-Mannitol                                                             | 69-65-8     | ph2 | 200          | -3.4  | N | 200          | 2.4   | N | 200          | 7.5   | N |

|                                             |             |     |     |       |   |     |       |   |     |       |   |
|---------------------------------------------|-------------|-----|-----|-------|---|-----|-------|---|-----|-------|---|
| Cytarabine hydrochloride                    | 69-74-9     | ph2 | 200 | 6.5   | N | 200 | 0.6   | N | 200 | -1.9  | N |
| Malic acid                                  | 6915-15-7   | ph2 | 200 | -5.8  | N | 200 | 5.6   | N | 200 | 1.3   | N |
| 2',3'-Dideoxyinosine                        | 69655-05-6  | ph2 | 200 | -3.2  | N | 200 | -9.6  | N | 200 | -2.7  | N |
| Cyclohexylphenylketone                      | 712-50-5    | ph2 | 200 | 3.3   | N | 200 | 4.7   | N | 200 | 2.1   | N |
| Didecyldimethylammonium chloride            | 7173-51-5   | ph2 | 200 | 106.0 | Y | 200 | 102.5 | Y | 200 | 98.0  | Y |
| Endrin                                      | 72-20-8     | ph2 | 200 | -11.9 | N | 200 | -0.4  | N | 200 | 8.1   | N |
| p,p'-DDD                                    | 72-54-8     | ph2 | 200 | 5.0   | N | 200 | 15.1  | N | 200 | 26.9  | N |
| p,p'-DDE                                    | 72-55-9     | ph2 | 200 | 6.9   | N | 200 | -2.2  | N | 200 | 6.5   | N |
| Fomesafen                                   | 72178-02-0  | ph2 | 200 | -7.6  | N | 200 | 0.5   | N | 200 | 9.7   | N |
| AVE5638                                     | 725228-45-5 | ph2 | 200 | 73.2  | Y | 200 | 94.5  | Y | 200 | 96.9  | Y |
| Phosmet                                     | 732-11-6    | ph2 | 200 | 76.3  | Y | 200 | 15.4  | N | 200 | 21.1  | N |
| 2,4,6-Tris(tert-butyl)phenol                | 732-26-3    | ph2 | 200 | -4.7  | N | 200 | 9.1   | N | 200 | 25.9  | N |
| N,N-Dimethyloctylamine                      | 7378-99-6   | ph2 | 200 | -1.0  | N | 200 | -0.7  | N | 200 | -3.5  | N |
| SSR504734                                   | 742693-38-5 | ph2 | 200 | 4.7   | N | 200 | 25.5  | N | 200 | -1.6  | N |
| Diphenyl isophthalate                       | 744-45-6    | ph2 | 200 | 37.6  | N | 200 | 38.6  | Y | 200 | 59.7  | Y |
| Mercuric chloride                           | 7487-94-7   | ph2 | 200 | 43.0  | N | 200 | 27.7  | N | 200 | 36.6  | N |
| Formamide                                   | 75-12-7     | ph2 | 200 | 1.0   | N | 200 | -13.3 | N | 200 | 1.6   | N |
| Dalapon                                     | 75-99-0     | ph2 | 200 | -5.1  | N | 200 | -19.9 | N | 200 | -2.9  | N |
| Lovastatin                                  | 75330-75-5  | ph2 | 200 | 88.0  | Y | 200 | 31.9  | Y | 200 | 51.7  | Y |
| PFOSA                                       | 754-91-6    | ph2 | 200 | 16.7  | N | 200 | 17.6  | N | 200 | -11.2 | N |
| Trichloroacetic acid                        | 76-03-9     | ph2 | 200 | 0.4   | N | 200 | 3.0   | N | 200 | 0.3   | N |
| Heptachlor                                  | 76-44-8     | ph2 | 200 | 3.8   | N | 200 | 14.1  | N | 200 | 31.8  | N |
| Silica                                      | 7631-86-9   | ph2 | 200 | 0.5   | N | 200 | -1.1  | N | 200 | -1.8  | N |
| Sodium nitrite                              | 7632-00-0   | ph2 | 200 | 6.6   | N | 200 | 1.7   | N | 200 | 3.3   | N |
| Phenolphthalein                             | 77-09-8     | ph2 | 200 | 3.7   | N | 200 | 23.9  | N | 200 | 0.5   | N |
| Bisphenol B                                 | 77-40-7     | ph2 | 200 | -1.4  | N | 200 | 20.0  | N | 200 | -8.8  | N |
| Hexachlorocyclopentadiene                   | 77-47-4     | ph2 | 200 | 69.2  | Y | 200 | 99.0  | Y | 200 | 95.6  | Y |
| 1,3-Dibromo-5,5-dimethylhydantoin           | 77-48-5     | ph2 | 200 | 4.7   | N | 200 | 2.4   | N | 200 | 0.9   | N |
| 5,5-Dimethylhydantoin                       | 77-71-4     | ph2 | 200 | 0.6   | N | 200 | 6.4   | N | 200 | -4.3  | N |
| Dimethyl sulfate                            | 77-78-1     | ph2 | 200 | 6.0   | N | 200 | 4.9   | N | 200 | -5.3  | N |
| Acetyltriethyl citrate                      | 77-89-4     | ph2 | 200 | -3.6  | N | 200 | 4.6   | N | 200 | 10.9  | N |
| Acetyl tributyl citrate                     | 77-90-7     | ph2 | 200 | -8.9  | N | 200 | 3.7   | N | 200 | 3.1   | N |
| Citric acid                                 | 77-92-9     | ph2 | 200 | -5.5  | N | 200 | 2.6   | N | 200 | 4.9   | N |
| Triethyl citrate                            | 77-93-0     | ph2 | 200 | -1.8  | N | 200 | 6.6   | N | 200 | 2.2   | N |
| 5-Ethyl-1-aza-3,7-dioxabicyclo[3.3.0]octane | 7747-35-5   | ph2 | 200 | -2.7  | N | 200 | 6.6   | N | 200 | 3.8   | N |
| Sodium chlorite                             | 7758-19-2   | ph2 | 200 | -6.8  | N | 200 | 2.2   | N | 200 | -3.5  | N |
| Tris(2-ethylhexyl) phosphate                | 78-42-2     | ph2 | 200 | 1.7   | N | 200 | -0.5  | N | 200 | 4.0   | N |



|                                              |             |     |              |       |   |             |       |   |             |       |   |
|----------------------------------------------|-------------|-----|--------------|-------|---|-------------|-------|---|-------------|-------|---|
| Isophorone                                   | 78-59-1     | ph2 | 200          | -7.3  | N | 200         | -3.6  | N | 200         | -7.4  | N |
| 2,5-Dimethyl-2,5-di-(tert-butylperoxy)hexane | 78-63-7     | ph2 | 200          | 7.4   | N | 200         | 6.0   | N | 200         | -1.1  | N |
| o,p'-DDT                                     | 789-02-6    | ph2 | 200          | -4.2  | N | 190         | -3.9  | N | 190         | 5.1   | N |
| Acrylamide                                   | 79-06-1     | ph2 | 200          | 4.7   | N | 200         | -10.0 | N | 200         | 2.2   | N |
| N-Methylacetamide                            | 79-16-3     | ph2 | 200          | 3.1   | N | 200         | 2.6   | N | 200         | -7.9  | N |
| Methacrylamide                               | 79-39-0     | ph2 | 200          | 2.2   | N | 200         | -13.8 | N | 200         | 2.1   | N |
| Dichloroacetic acid                          | 79-43-6     | ph2 | 200          | -0.4  | N | 200         | 3.3   | N | 200         | 2.3   | N |
| Dimethylcarbamoyl chloride                   | 79-44-7     | ph2 | 200          | -4.3  | N | 190         | 1.3   | N | 190         | -2.7  | N |
| 3,3',5,5'-Tetrabromobisphenol A              | 79-94-7     | ph2 | 190          | 106.0 | Y | 190         | 104.1 | Y | 190         | 87.4  | Y |
| Norgestrel                                   | 797-63-7    | ph2 | 200          | -1.7  | N | 200         | 3.8   | N | 200         | 19.8  | N |
| Simvastatin                                  | 79902-63-9  | ph2 | 200          | 83.4  | Y | 200         | 34.7  | Y | 200         | 56.8  | Y |
| Dapsone                                      | 80-08-0     | ph2 | 200          | -0.1  | Y | 200         | 2.3   | N | 200         | -0.4  | N |
| Cumene hydroperoxide                         | 80-15-9     | ph2 | 200          | 23.4  | N | 200         | 5.6   | N | 200         | -6.1  | N |
| Dicumyl peroxide                             | 80-43-3     | ph2 | 200          | 0.0   | N | 200         | 3.5   | N | 200         | 0.1   | N |
| 4-(2-Methylbutan-2-yl)phenol                 | 80-46-6     | ph2 | 200          | -6.2  | N | 200         | -2.4  | N | 200         | -16.0 | N |
| Clove leaf oil                               | 8000-34-8   | ph2 | 100<br>µg/ml | 5.3   | N | 52<br>µg/ml | -6.0  | N | 52<br>µg/ml | -3.8  | N |
| Etofenprox                                   | 80844-07-1  | ph2 | 200          | -0.3  | N | 200         | 2.1   | N | 200         | -0.1  | N |
| Warfarin                                     | 81-81-2     | ph2 | 200          | -2.9  | N | 200         | 1.0   | N | 200         | -0.8  | N |
| Phenolphthalin                               | 81-90-3     | ph2 | 200          | 2.9   | N | 200         | 22.5  | N | 200         | 5.7   | N |
| Pravastatin sodium                           | 81131-70-6  | ph2 | 100          | -15.9 | N | 100         | -4.7  | N | 100         | 5.3   | N |
| Sodium saccharin hydrate                     | 82385-42-0  | ph2 | 200          | -3.6  | N | 200         | 8.7   | N | 200         | 6.3   | N |
| Sodium 4-nitrophenolate                      | 824-78-2    | ph2 | 200          | -9.6  | N | 200         | -3.0  | N | 200         | -3.0  | N |
| Butyryl trihexyl citrate                     | 82469-79-2  | ph2 | 200          | -10.3 | Y | 200         | 6.3   | N | 200         | 0.6   | N |
| PharmaGSID_48513                             | 825643-57-0 | ph2 | 160          | 11.6  | N | 160         | -8.1  | N | 160         | 27.0  | N |
| 2-Norbornene-5,6-dicarboxylic anhydride      | 826-62-0    | ph2 | 200          | -2.1  | N | 200         | 3.9   | N | 200         | 3.7   | N |
| Raloxifene hydrochloride                     | 82640-04-8  | ph2 | 200          | 13.8  | N | 200         | 50.2  | Y | 200         | -1.5  | Y |
| Dimethoxane                                  | 828-00-2    | ph2 | 200          | -1.6  | N | 200         | -9.0  | N | 200         | 1.0   | N |
| Acenaphthene                                 | 83-32-9     | ph2 | 200          | 0.6   | N | 200         | 0.1   | N | 200         | 2.0   | N |
| 1,2-Dimethyl-3-nitrobenzene                  | 83-41-0     | ph2 | 200          | 0.1   | N | 200         | 3.6   | N | 200         | 2.8   | N |
| Theobromine                                  | 83-67-0     | ph2 | 80           | 1.5   | N | 80          | -1.9  | N | 80          | -0.7  | N |
| 4,4'-Methylenebis(2-methylaniline)           | 838-88-0    | ph2 | 200          | 0.3   | N | 200         | 10.7  | N | 200         | -9.4  | N |
| meso-Hexestrol                               | 84-16-2     | ph2 | 200          | 26.2  | N | 200         | 49.8  | N | 200         | 46.7  | N |
| Diethyl phthalate                            | 84-66-2     | ph2 | 200          | 16.3  | N | 200         | 5.1   | N | 200         | 4.3   | N |
| Diisobutyl phthalate                         | 84-69-5     | ph2 | 200          | -6.1  | N | 200         | -2.0  | N | 200         | -10.4 | N |
| Dihexyl phthalate                            | 84-75-3     | ph2 | 200          | 4.3   | N | 200         | -16.6 | N | 200         | -0.3  | N |
| C.I. Solvent Yellow 14                       | 842-07-9    | ph2 | 200          | 11.1  | N | 200         | 0.1   | N | 200         | 24.2  | N |

|                                   |             |     |     |       |   |     |       |   |     |       |   |
|-----------------------------------|-------------|-----|-----|-------|---|-----|-------|---|-----|-------|---|
| Mifepristone                      | 84371-65-3  | ph2 | 200 | -8.5  | N | 190 | 9.9   | N | 190 | 35.6  | N |
| 4-Nonylphenol, branched           | 84852-15-3  | ph2 | 200 | 101.9 | Y | 200 | 92.1  | Y | 200 | 96.6  | Y |
| Phenanthrene                      | 85-01-8     | ph2 | 200 | -9.7  | N | 200 | 0.9   | N | 200 | 1.8   | N |
| Benzyl butyl phthalate            | 85-68-7     | ph2 | 200 | -4.1  | N | 200 | -6.8  | N | 200 | -10.9 | N |
| MK-812                            | 851916-42-2 | ph2 | 200 | 2.1   | N | 200 | 0.2   | N | 200 | -1.9  | N |
| PK 11195                          | 85532-75-8  | ph2 | 130 | 0.1   | N | 120 | -1.7  | N | 120 | -8.8  | N |
| N-Nitrosodiphenylamine            | 86-30-6     | ph2 | 200 | 3.4   | N | 200 | 7.7   | N | 200 | 1.2   | N |
| Fluorene                          | 86-73-7     | ph2 | 200 | -5.1  | N | 200 | -4.0  | N | 200 | 2.0   | N |
| AVE9423                           | 862243-29-6 | ph2 | 200 | 5.9   | N | 200 | 3.4   | N | 200 | -0.3  | N |
| Fluconazole                       | 86386-73-4  | ph2 | 200 | -8.1  | N | 200 | -7.1  | N | 200 | -4.1  | N |
| GSK232420A                        | 864283-48-7 | ph2 | 200 | -5.4  | N | 200 | 5.3   | N | 200 | 1.2   | N |
| Hexaflumuron                      | 86479-06-3  | ph2 | 200 | -1.8  | N | 200 | 3.8   | N | 200 | 3.7   | N |
| 1,2,3-Trichlorobenzene            | 87-61-6     | ph2 | 200 | 0.3   | N | 200 | -6.0  | N | 200 | 11.3  | N |
| 2,6-Dimethylaniline               | 87-62-7     | ph2 | 210 | 5.8   | N | 200 | 7.7   | N | 200 | -0.9  | N |
| L-Tartaric acid                   | 87-69-4     | ph2 | 200 | 1.9   | N | 200 | 1.3   | N | 200 | 0.4   | N |
| Pentachlorophenol                 | 87-86-5     | ph2 | 100 | 46.9  | N | 100 | 15.4  | N | 100 | 4.3   | N |
| N-Methyl-2-pyrrolidone            | 872-50-4    | ph2 | 200 | 3.1   | N | 200 | -0.4  | N | 200 | 4.9   | N |
| 2,4,6-Trichlorophenol             | 88-06-2     | ph2 | 200 | 2.9   | N | 200 | 4.2   | N | 200 | -3.1  | N |
| N-Vinyl-2-pyrrolidone             | 88-12-0     | ph2 | 200 | -2.3  | N | 200 | 7.7   | N | 200 | 1.2   | N |
| 2-tert-Butylphenol                | 88-18-6     | ph2 | 200 | -0.3  | N | 200 | -3.2  | N | 200 | 4.6   | N |
| 2,5-Di-tert-butylbenzene-1,4-diol | 88-58-4     | ph2 | 200 | -1.5  | N | 200 | 0.8   | N | 200 | 0.0   | N |
| 2-tert-Butyl-5-methylphenol       | 88-60-8     | ph2 | 200 | 5.1   | N | 200 | -2.4  | N | 200 | -3.4  | N |
| 2-Nitrotoluene                    | 88-72-2     | ph2 | 200 | -4.4  | N | 200 | -11.6 | N | 200 | 0.4   | N |
| Dinoseb                           | 88-85-7     | ph2 | 200 | -14.7 | N | 200 | 15.0  | N | 200 | 2.1   | N |
| Trioctyl trimellitate             | 89-04-3     | ph2 | 200 | -0.6  | N | 200 | -0.2  | N | 200 | 3.1   | N |
| 2-(Butan-2-yl)phenol              | 89-72-5     | ph2 | 200 | -5.0  | N | 200 | 5.0   | N | 200 | -4.3  | N |
| Thymol                            | 89-83-8     | ph2 | 200 | -2.3  | N | 200 | 1.7   | N | 200 | -7.5  | N |
| 2-Anisidine                       | 90-04-0     | ph2 | 200 | -2.2  | N | 200 | 6.2   | N | 200 | 4.3   | N |
| 1-Methylnaphthalene               | 90-12-0     | ph2 | 200 | 5.4   | N | 200 | 3.2   | N | 200 | 2.3   | N |
| Michler's ketone                  | 90-94-8     | ph2 | 200 | 14.2  | N | 200 | 13.8  | N | 200 | 9.6   | N |
| Naphthalene                       | 91-20-3     | ph2 | 200 | -3.7  | N | 200 | -6.5  | N | 200 | -1.2  | N |
| Quinoline                         | 91-22-5     | ph2 | 200 | -3.7  | N | 200 | -3.2  | N | 200 | -3.3  | N |
| Ethoxyquin                        | 91-53-2     | ph2 | 200 | 2.4   | N | 200 | 22.5  | N | 200 | 36.3  | N |
| 2-Naphthylamine                   | 91-59-8     | ph2 | 200 | 3.1   | N | 200 | 6.9   | N | 200 | 2.0   | N |
| 6-Methylquinoline                 | 91-62-3     | ph2 | 200 | -1.2  | N | 200 | 4.3   | N | 200 | 3.6   | N |
| Coumarin                          | 91-64-5     | ph2 | 200 | -1.3  | N | 200 | 2.8   | N | 200 | 3.9   | N |
| N,N-Diethylaniline                | 91-66-7     | ph2 | 200 | 4.9   | N | 200 | -9.1  | N | 200 | 2.1   | N |

|                                            |             |     |              |       |   |              |       |   |              |       |   |
|--------------------------------------------|-------------|-----|--------------|-------|---|--------------|-------|---|--------------|-------|---|
| C10-21 sulfonic acids phenyl esters        | 91082-17-6  | ph2 | 100<br>µg/ml | 3.5   | N | 100<br>µg/ml | -0.7  | N | 100<br>µg/ml | 9.2   | N |
| Biphenyl                                   | 92-52-4     | ph2 | 200          | -4.0  | N | 200          | 3.6   | N | 200          | 0.3   | N |
| 4-Cyclohexylcyclohexanone                  | 92-68-2     | ph2 | 200          | 0.4   | N | 200          | 10.0  | N | 200          | 34.2  | N |
| Phenothiazine                              | 92-84-2     | ph2 | 200          | 0.3   | N | 200          | 7.3   | N | 200          | -0.1  | N |
| Benzidine                                  | 92-87-5     | ph2 | 200          | -5.7  | N | 200          | -0.6  | N | 200          | 0.9   | N |
| N-Nitrosodibutylamine                      | 924-16-3    | ph2 | 200          | 3.6   | N | 200          | -1.4  | N | 200          | -3.3  | N |
| 2,2'-[Ethane-1,2-diylbis(oxy)]diethanamine | 929-59-9    | ph2 | 200          | 1.4   | N | 200          | 2.1   | N | 200          | 6.3   | N |
| SR58611                                    | 929601-09-2 | ph2 | 180          | 4.0   | N | 180          | 35.5  | N | 180          | -17.9 | N |
| Methyleugenol                              | 93-15-2     | ph2 | 200          | 7.0   | N | 200          | 0.3   | N | 200          | -2.9  | N |
| Propylparaben                              | 94-13-3     | ph2 | 200          | 2.4   | N | 200          | 3.6   | N | 200          | -4.0  | N |
| Butylparaben                               | 94-26-8     | ph2 | 200          | 1.0   | N | 200          | 1.1   | N | 200          | -10.7 | N |
| Triethylene glycol bis(2-ethylhexanoate)   | 94-28-0     | ph2 | 200          | -5.1  | N | 200          | 2.9   | N | 200          | -1.7  | N |
| Safrole                                    | 94-59-7     | ph2 | 200          | -1.4  | N | 200          | 2.5   | N | 200          | 2.6   | N |
| 1,2,3-Benzotriazole                        | 95-14-7     | ph2 | 200          | -3.4  | N | 200          | -3.4  | N | 200          | -1.3  | N |
| o-Cresol                                   | 95-48-7     | ph2 | 200          | 5.1   | N | 200          | 1.5   | N | 200          | -0.7  | N |
| 2-Chlorotoluene                            | 95-49-8     | ph2 | 200          | 0.6   | N | 200          | -0.2  | N | 200          | 0.5   | N |
| 1,2-Dichlorobenzene                        | 95-50-1     | ph2 | 200          | -2.6  | N | 200          | 1.3   | N | 200          | -1.2  | N |
| 2-Methylaniline                            | 95-53-4     | ph2 | 200          | -0.1  | N | 200          | 5.7   | N | 200          | -2.2  | N |
| 1,2-Phenylenediamine                       | 95-54-5     | ph2 | 200          | -2.3  | N | 200          | 14.1  | N | 200          | 8.0   | N |
| 2-Chlorophenol                             | 95-57-8     | ph2 | 200          | -5.1  | N | 200          | 2.4   | N | 200          | -2.4  | N |
| 1,2,4-Trimethylbenzene                     | 95-63-6     | ph2 | 210          | -5.1  | N | 200          | 2.4   | N | 200          | 3.2   | N |
| 3,4-Dimethylphenol                         | 95-65-8     | ph2 | 200          | -1.1  | N | 200          | -7.5  | N | 200          | 3.1   | N |
| 2,4-Diaminotoluene                         | 95-80-7     | ph2 | 200          | 14.3  | N | 200          | -11.6 | N | 200          | 8.5   | N |
| 4-Chloro-1,2-diaminobenzene                | 95-83-0     | ph2 | 200          | 4.7   | N | 200          | 7.3   | N | 200          | -2.6  | N |
| 2,5-Dimethylphenol                         | 95-87-4     | ph2 | 200          | -2.3  | N | 200          | -0.7  | N | 200          | 2.9   | N |
| 1,2,4,5-Tetrachlorobenzene                 | 95-94-3     | ph2 | 200          | 1.7   | N | 200          | 2.0   | N | 200          | -5.2  | N |
| 2,4,5-Trichlorophenol                      | 95-95-4     | ph2 | 200          | -11.4 | N | 200          | 9.7   | N | 200          | -3.5  | N |
| Styrene oxide                              | 96-09-3     | ph2 | 200          | 7.0   | N | 200          | -2.0  | N | 200          | 6.3   | N |
| 1,2,3-Trichloropropane                     | 96-18-4     | ph2 | 200          | 2.3   | N | 200          | 1.2   | N | 200          | -6.3  | N |
| 1,3-Dichloro-2-propanol                    | 96-23-1     | ph2 | 200          | -13.0 | N | 200          | 9.9   | N | 200          | -6.7  | N |
| 2-Butanone oxime                           | 96-29-7     | ph2 | 200          | 4.3   | N | 200          | -7.2  | N | 200          | 4.2   | N |
| 4-Butyrolactone                            | 96-48-0     | ph2 | 200          | -2.5  | N | 200          | 1.6   | N | 200          | -2.6  | N |
| 2-tert-Butyl-4-ethylphenol                 | 96-70-8     | ph2 | 200          | 4.7   | N | 200          | 0.5   | N | 200          | -6.7  | N |
| 2,4-Di-tert-butylphenol                    | 96-76-4     | ph2 | 200          | 92.4  | Y | 200          | 61.6  | Y | 200          | 91.6  | Y |
| Eugenol                                    | 97-53-0     | ph2 | 200          | 4.8   | N | 200          | 15.8  | N | 200          | 11.0  | N |
| Isoeugenol                                 | 97-54-1     | ph2 | 200          | 9.9   | N | 200          | 51.3  | Y | 200          | 86.1  | Y |

|                             |             |     |     |       |   |     |       |   |     |       |   |
|-----------------------------|-------------|-----|-----|-------|---|-----|-------|---|-----|-------|---|
| 2-Amino-5-azotoluene        | 97-56-3     | ph2 | 200 | 5.2   | N | 200 | 3.0   | N | 200 | -2.6  | N |
| Disulfiram                  | 97-77-8     | ph2 | 200 | 12.4  | N | 200 | 6.2   | N | 200 | 20.8  | N |
| Troglitazone                | 97322-87-7  | ph2 | 200 | 100.4 | Y | 200 | 86.3  | Y | 200 | 93.0  | Y |
| Furfural                    | 98-01-1     | ph2 | 200 | -1.0  | N | 200 | 0.0   | N | 200 | 4.2   | N |
| tert-Butylbenzene           | 98-06-6     | ph2 | 200 | -5.6  | N | 200 | 4.7   | N | 200 | 2.9   | N |
| Benzotrichloride            | 98-07-7     | ph2 | 200 | -2.5  | N | 200 | 10.3  | N | 200 | 2.4   | N |
| 4-tert-Butylphenol          | 98-54-4     | ph2 | 200 | -6.5  | N | 200 | -2.1  | N | 200 | -13.3 | N |
| Acetophenone                | 98-86-2     | ph2 | 200 | -5.0  | N | 200 | -1.9  | N | 200 | -1.6  | N |
| Benzal chloride             | 98-87-3     | ph2 | 200 | 2.2   | N | 200 | 0.7   | N | 200 | 2.7   | N |
| Nitrobenzene                | 98-95-3     | ph2 | 200 | -5.8  | N | 200 | -1.9  | N | 200 | -1.1  | N |
| 3-Nitrotoluene              | 99-08-1     | ph2 | 200 | -4.3  | N | 200 | 7.6   | N | 200 | -9.1  | N |
| 1,2-Dimethyl-4-nitrobenzene | 99-51-4     | ph2 | 200 | 3.1   | N | 200 | 4.6   | N | 200 | 2.4   | N |
| 3,4-Dichloronitrobenzene    | 99-54-7     | ph2 | 200 | 1.3   | N | 200 | 9.0   | N | 200 | 34.2  | N |
| 2-Methyl-5-nitroaniline     | 99-55-8     | ph2 | 200 | 6.7   | N | 200 | -1.4  | N | 200 | -1.8  | N |
| 2-Methoxy-5-nitroaniline    | 99-59-2     | ph2 | 200 | -6.7  | N | 200 | 1.5   | N | 200 | -20.6 | N |
| 1,3-Diisopropylbenzene      | 99-62-7     | ph2 | 200 | 31.4  | N | 200 | 2.9   | N | 200 | -0.5  | N |
| 1,3-Dinitrobenzene          | 99-65-0     | ph2 | 210 | -5.3  | N | 200 | -18.1 | N | 200 | 5.3   | N |
| Valproic acid               | 99-66-1     | ph2 | 200 | 0.3   | N | 200 | -1.7  | N | 200 | 5.0   | N |
| 4-(Butan-2-yl)phenol        | 99-71-8     | ph2 | 200 | -0.8  | N | 200 | -4.1  | N | 200 | -7.4  | N |
| Methylparaben               | 99-76-3     | ph2 | 200 | -4.9  | N | 200 | 12.1  | N | 200 | -1.3  | N |
| p-Cymene                    | 99-87-6     | ph2 | 200 | -3.9  | N | 200 | 3.0   | N | 200 | 2.2   | N |
| N,N,4-Trimethylaniline      | 99-97-8     | ph2 | 200 | 5.2   | N | 200 | 5.0   | N | 200 | 10.3  | N |
| 4-Nitrotoluene              | 99-99-0     | ph2 | 200 | -4.5  | N | 200 | -0.2  | N | 200 | 0.9   | N |
| CI-1018                     | NOCAS_47248 | ph2 | 200 | 7.0   | N | 200 | -4.7  | N | 200 | -7.0  | N |
| CP-465394                   | NOCAS_47255 | ph2 | 100 | -0.7  | N | 100 | 3.4   | N | 100 | 0.4   | N |
| CP-471358                   | NOCAS_47265 | ph2 | 200 | -3.3  | N | 200 | 5.5   | N | 200 | -1.6  | N |
| CP-642931                   | NOCAS_47267 | ph2 | 100 | -2.4  | N | 100 | -2.4  | N | 100 | -5.8  | N |
| CI-1044                     | NOCAS_47291 | ph2 | 200 | -1.5  | N | 200 | -5.5  | N | 200 | 3.0   | N |
| PD 0200347                  | NOCAS_47292 | ph2 | 200 | 2.0   | N | 200 | 5.0   | N | 200 | -3.8  | N |
| CP-422935                   | NOCAS_47299 | ph2 | 200 | -4.8  | N | 200 | 0.8   | N | 200 | -3.9  | N |
| CP-608039                   | NOCAS_47305 | ph2 | 190 | -0.2  | N | 180 | 2.6   | N | 180 | -2.0  | N |
| SB413217A                   | NOCAS_47325 | ph2 | 90  | -3.3  | N | 90  | -0.5  | N | 90  | 25.4  | N |
| MK-274                      | NOCAS_47328 | ph2 | 200 | 23.5  | N | 200 | 51.0  | Y | 200 | 35.2  | Y |
| PharmaGSID_47330            | NOCAS_47330 | ph2 | 200 | 0.3   | N | 200 | -5.0  | N | 200 | 12.0  | N |
| PharmaGSID_47333            | NOCAS_47333 | ph2 | 200 | -4.9  | N | 200 | 5.6   | N | 200 | -0.9  | N |
| MK-968                      | NOCAS_47334 | ph2 | 200 | -5.4  | N | 200 | 13.7  | N | 200 | -4.1  | N |
| SR125047                    | NOCAS_47342 | ph2 | 180 | -3.7  | N | 180 | 90.0  | Y | 180 | 73.7  | Y |

|                                                                                                                                                                        |             |     |              |       |   |              |       |   |              |       |   |
|------------------------------------------------------------------------------------------------------------------------------------------------------------------------|-------------|-----|--------------|-------|---|--------------|-------|---|--------------|-------|---|
| SSR162369                                                                                                                                                              | NOCAS_47346 | ph2 | 200          | 1.5   | N | 200          | 9.1   | N | 200          | 26.1  | N |
| SSR 241586 HCl                                                                                                                                                         | NOCAS_47353 | ph2 | 120          | 12.3  | N | 120          | 77.6  | Y | 120          | 2.2   | Y |
| SAR115740                                                                                                                                                              | NOCAS_47366 | ph2 | 200          | 16.0  | N | 200          | 9.3   | N | 200          | 5.2   | N |
| SSR161421                                                                                                                                                              | NOCAS_47374 | ph2 | 200          | -8.9  | N | 200          | 1.2   | N | 200          | 4.0   | N |
| AVE6324                                                                                                                                                                | NOCAS_47377 | ph2 | 200          | 88.4  | Y | 200          | 107.7 | Y | 200          | 96.9  | Y |
| SSR126768                                                                                                                                                              | NOCAS_47379 | ph2 | 200          | -4.0  | N | 200          | 15.4  | N | 200          | 8.1   | N |
| AVE8923                                                                                                                                                                | NOCAS_47381 | ph2 | 20           | 9.5   | N | 10           | 14.4  | N | 10           | -2.0  | N |
| AVE3247                                                                                                                                                                | NOCAS_47383 | ph2 | 50           | -3.7  | N | 40           | 0.7   | N | 40           | -3.1  | N |
| SAR377142                                                                                                                                                              | NOCAS_47385 | ph2 | 180          | -4.9  | N | 170          | 2.5   | N | 170          | 12.9  | N |
| SAR102779                                                                                                                                                              | NOCAS_47387 | ph2 | 200          | -3.7  | N | 150          | 61.2  | Y | 150          | 10.4  | Y |
| Grinstad Soft-N-Safe                                                                                                                                                   | NOCAS_47394 | ph2 | 100<br>µg/ml | -8.4  | N | 100<br>µg/ml | 9.3   | N | 100<br>µg/ml | -16.5 | N |
| 3,9-Epoxy-3H-azirino[2,3-c][1]benzazocine-5-carboxaldehyde, 1-acetyl-9-(acetyloxy)-8-[[[(aminocarbonyloxy)methyl]-1,1a,2,8,9,9a-hexahydro-7-methoxy-, (1aS,8R,9S,9aS)- | NOCAS_48166 | ph2 | 200          | 8.9   | N | 200          | 1.5   | N | 200          | 2.5   | N |
| PharmaGSID_48172                                                                                                                                                       | NOCAS_48172 | ph2 | 170          | -21.0 | N | 160          | 0.7   | N | 160          | 4.4   | N |
| YM218                                                                                                                                                                  | NOCAS_48176 | ph2 | 120          | -11.0 | N | 120          | 2.9   | N | 120          | -6.5  | N |
| PharmaGSID_48505                                                                                                                                                       | NOCAS_48505 | ph2 | 200          | -2.8  | N | 200          | 5.7   | N | 200          | -0.4  | N |
| PharmaGSID_48507                                                                                                                                                       | NOCAS_48507 | ph2 | 200          | 3.2   | N | 200          | 1.3   | N | 200          | -7.5  | N |
| PharmaGSID_48509                                                                                                                                                       | NOCAS_48509 | ph2 | 200          | -2.8  | N | 200          | -5.7  | N | 200          | 4.9   | N |
| PharmaGSID_48514                                                                                                                                                       | NOCAS_48514 | ph2 | 200          | -13.1 | N | 200          | 2.6   | N | 200          | 2.8   | N |
| PharmaGSID_48516                                                                                                                                                       | NOCAS_48516 | ph2 | 200          | -7.3  | N | 200          | 1.7   | N | 200          | -8.2  | N |
| PharmaGSID_48518                                                                                                                                                       | NOCAS_48518 | ph2 | 200          | 11.8  | N | 200          | 0.2   | N | 200          | 13.1  | N |
| HMR1171 trifluoroacetate (1:1)                                                                                                                                         | NOCAS_48522 | ph2 | 80           | 65.8  | Y | 70           | 76.6  | Y | 70           | 39.8  | Y |
| Terephthalic acid                                                                                                                                                      | 100-21-0    | e1k | 200          | -2.7  | N | 200          | -1.3  | N | 200          | 4.6   | N |
| Cyclohexanone oxime                                                                                                                                                    | 100-64-1    | e1k | 200          | -2.6  | N | 190          | 2.2   | N | 190          | 6.9   | N |
| Dysprosium(III) chloride                                                                                                                                               | 10025-74-8  | e1k | 190          | -4.9  | N | 180          | 7.9   | N | 180          | 7.8   | N |
| 2-Propyl-1-heptanol                                                                                                                                                    | 10042-59-8  | e1k | 200          | -1.7  | N | 200          | 7.9   | N | 200          | 0.0   | N |
| Sodium 2-formylbenzenesulfonate                                                                                                                                        | 1008-72-6   | e1k | 200          | -1.6  | N | 190          | 0.0   | N | 190          | 2.1   | N |
| 4-(2-Phenylpropan-2-yl)-N-[4-(2-phenylpropan-2-yl)phenyl]aniline                                                                                                       | 10081-67-1  | e1k | 200          | -5.3  | N | 200          | 0.9   | N | 200          | 10.7  | N |
| 1,1-Dimethyl-2-phenylethyl butanoate                                                                                                                                   | 10094-34-5  | e1k | 200          | -4.5  | N | 200          | -13.8 | N | 200          | 3.2   | N |
| 2,4,6-Tris(allyloxy)-1,3,5-triazine                                                                                                                                    | 101-37-1    | e1k | 200          | 0.0   | N | 200          | -9.4  | N | 200          | -1.3  | N |
| Fenuron                                                                                                                                                                | 101-42-8    | e1k | 200          | -0.3  | N | 200          | -13.3 | N | 200          | 3.5   | N |
| Diphenylmethane                                                                                                                                                        | 101-81-5    | e1k | 200          | 1.0   | N | 200          | 4.2   | N | 200          | 4.7   | N |
| Dicyclohexylamine                                                                                                                                                      | 101-83-7    | e1k | 200          | 0.7   | N | 200          | 4.3   | N | 200          | 6.3   | N |
| Diphenyl oxide                                                                                                                                                         | 101-84-8    | e1k | 200          | 1.6   | N | 200          | -4.3  | N | 200          | 6.0   | N |

|                                             |             |     |     |      |   |     |       |   |     |       |   |
|---------------------------------------------|-------------|-----|-----|------|---|-----|-------|---|-----|-------|---|
| Flufenoxuron                                | 101463-69-8 | e1k | 200 | 0.8  | N | 200 | 1.5   | N | 200 | 2.4   | N |
| Fadrozole hydrochloride                     | 102676-31-3 | e1k | 100 | -3.5 | N | 100 | -2.4  | N | 100 | 3.7   | N |
| 2-Ethylhexyl acetate                        | 103-09-3    | e1k | 200 | -2.1 | N | 200 | -1.4  | N | 200 | 6.5   | N |
| 2-Ethylhexyl acrylate                       | 103-11-7    | e1k | 200 | 79.0 | Y | 200 | 87.9  | Y | 200 | 78.1  | Y |
| 4,4'-Dithiodimorpholine                     | 103-34-4    | e1k | 200 | 12.6 | N | 200 | 1.2   | N | 200 | -4.2  | N |
| Benzyl cinnamate                            | 103-41-3    | e1k | 200 | 10.6 | N | 200 | 62.0  | Y | 200 | 68.6  | Y |
| 1-Piperazineethanol                         | 103-76-4    | e1k | 200 | -0.9 | N | 200 | 4.8   | N | 200 | 7.0   | N |
| Lufenuron                                   | 103055-07-8 | e1k | 200 | -1.2 | N | 200 | 1.5   | N | 200 | -0.4  | N |
| Endosulfan sulfate                          | 1031-07-8   | e1k | 200 | 1.5  | N | 200 | -2.3  | N | 200 | 8.4   | N |
| 4-Butylaniline                              | 104-13-2    | e1k | 200 | 4.0  | N | 200 | 0.2   | N | 200 | 4.9   | N |
| 4-Dodecylphenol                             | 104-43-8    | e1k | 200 | 67.0 | Y | 200 | 79.2  | Y | 200 | 93.4  | Y |
| 4-Propylanisole                             | 104-45-0    | e1k | 200 | -3.4 | N | 200 | -4.2  | N | 200 | 0.6   | N |
| 3-Phenyl-2-propen-1-ol                      | 104-54-1    | e1k | 200 | 2.3  | N | 200 | 5.6   | N | 200 | 16.8  | N |
| gamma-Nonanolactone                         | 104-61-0    | e1k | 200 | 3.5  | N | 200 | -8.6  | N | 200 | -8.8  | N |
| 1,2-Diphenoxyethane                         | 104-66-5    | e1k | 200 | -5.1 | N | 200 | -0.2  | N | 200 | -3.3  | N |
| 1,4-Heptanolide                             | 105-21-5    | e1k | 200 | -6.6 | N | 200 | -0.3  | N | 200 | 1.7   | N |
| Ethyl propionate                            | 105-37-3    | e1k | 200 | -4.5 | N | 200 | -12.3 | N | 200 | 8.3   | N |
| Diethyl propanedioate                       | 105-53-3    | e1k | 210 | -2.6 | N | 200 | 2.1   | N | 200 | 6.4   | N |
| N,N'-Diethylthiourea                        | 105-55-5    | e1k | 200 | 4.4  | N | 200 | 0.3   | N | 200 | -1.1  | N |
| Citronellal                                 | 106-23-0    | e1k | 200 | -2.9 | N | 200 | 12.3  | N | 200 | 4.4   | N |
| 4-Thiocresol                                | 106-45-6    | e1k | 200 | 33.1 | N | 200 | -8.1  | N | 200 | 4.8   | N |
| 4-Chlorophenol                              | 106-48-9    | e1k | 200 | -0.8 | N | 200 | 4.1   | N | 200 | 7.5   | N |
| 1,4-Benzenediamine                          | 106-50-3    | e1k | 200 | 1.0  | N | 190 | 22.3  | N | 190 | 18.3  | N |
| 3-Octanone                                  | 106-68-3    | e1k | 200 | -0.5 | N | 200 | 1.8   | N | 200 | 3.7   | N |
| 1,2-Dibromoethane                           | 106-93-4    | e1k | 200 | -2.9 | N | 200 | -2.6  | N | 200 | -3.8  | N |
| Trimethoxypropylsilane                      | 1067-25-0   | e1k | 200 | 5.3  | N | 200 | 1.5   | N | 200 | 7.9   | N |
| Tris(2-methoxyethoxy)vinylsilane            | 1067-53-4   | e1k | 200 | 7.2  | N | 200 | 3.5   | N | 200 | 13.2  | N |
| Acrylonitrile                               | 107-13-1    | e1k | 200 | -5.5 | N | 200 | 0.8   | N | 200 | 7.1   | N |
| Allyl alcohol                               | 107-18-6    | e1k | 200 | -4.0 | N | 200 | -3.3  | N | 200 | 13.3  | N |
| Chloroacetaldehyde                          | 107-20-0    | e1k | 200 | -4.0 | N | 200 | 2.7   | N | 200 | 19.1  | N |
| Chloromethyl methyl ether                   | 107-30-2    | e1k | 70  | -4.8 | N | 60  | 5.5   | N | 60  | 0.7   | N |
| Hexamethyldisiloxane                        | 107-46-0    | e1k | 200 | 0.7  | N | 200 | -4.1  | N | 200 | -6.3  | N |
| Octamethyltrisiloxane                       | 107-51-7    | e1k | 200 | -0.9 | N | 200 | -5.4  | N | 200 | 3.6   | N |
| 3,5-Dimethyl-1-hexyn-3-ol                   | 107-54-0    | e1k | 200 | -1.0 | N | 200 | 1.0   | N | 200 | 3.1   | N |
| 7-Hydroxy-3,7-dimethyloctanal               | 107-75-5    | e1k | 200 | 2.2  | N | 200 | -0.4  | N | 200 | 1.3   | N |
| 2-Pentanone                                 | 107-87-9    | e1k | 200 | -2.5 | N | 190 | 1.5   | N | 190 | 6.7   | N |
| Sulfuric acid, monononyl ester, sodium salt | 1072-15-7   | e1k | 200 | 7.1  | N | 200 | 5.0   | N | 200 | -10.4 | N |

|                                                   |             |     |     |       |   |     |      |   |     |       |   |
|---------------------------------------------------|-------------|-----|-----|-------|---|-----|------|---|-----|-------|---|
| 1,4-Cyclohexanedicarboxylic acid                  | 1076-97-7   | e1k | 200 | 1.6   | N | 200 | -9.7 | N | 200 | 3.3   | N |
| Isopropyl acetate                                 | 108-21-4    | e1k | 200 | -3.5  | N | 190 | 3.8  | N | 190 | 8.7   | N |
| Propylene carbonate                               | 108-32-7    | e1k | 200 | 1.7   | N | 200 | -1.9 | N | 200 | -0.5  | N |
| m-Xylene                                          | 108-38-3    | e1k | 200 | -1.4  | N | 200 | -1.6 | N | 200 | -4.7  | N |
| m-Cresol                                          | 108-39-4    | e1k | 200 | -4.0  | N | 200 | 3.0  | N | 200 | 1.5   | N |
| 3,5-Dimethylphenol                                | 108-68-9    | e1k | 200 | 2.4   | N | 200 | 8.5  | N | 200 | 3.6   | N |
| 2,4,6-Trichloro-s-triazine                        | 108-77-0    | e1k | 200 | -5.3  | N | 200 | 0.1  | N | 200 | -0.4  | N |
| Diisobutyl ketone                                 | 108-83-8    | e1k | 200 | -1.1  | N | 200 | 2.9  | N | 200 | 0.6   | N |
| Benzenethiol                                      | 108-98-5    | e1k | 200 | 8.6   | N | 200 | -2.9 | N | 200 | 18.1  | N |
| 3-Methylpyridine                                  | 108-99-6    | e1k | 200 | -1.8  | N | 200 | 1.6  | N | 200 | -0.4  | N |
| Acetic acid, C8-10-branched alkyl esters, C9-rich | 108419-33-6 | e1k | 200 | -2.9  | N | 200 | -1.3 | N | 200 | 1.1   | N |
| Heptylparaben                                     | 1085-12-7   | e1k | 200 | 102.5 | Y | 200 | 96.5 | Y | 200 | 95.5  | Y |
| 4-Methylmorpholine                                | 109-02-4    | e1k | 200 | -3.8  | N | 200 | -0.3 | N | 200 | 5.4   | N |
| N,N'-Dibutylthiourea                              | 109-46-6    | e1k | 200 | 1.9   | N | 200 | 0.2  | N | 200 | 0.4   | N |
| Pentanoic acid                                    | 109-52-4    | e1k | 200 | 0.2   | N | 200 | 2.7  | N | 200 | 8.0   | N |
| 3-(Dimethylamino)propylamine                      | 109-55-7    | e1k | 200 | 2.3   | N | 190 | 1.9  | N | 190 | 7.5   | N |
| Propanedinitrile                                  | 109-77-3    | e1k | 200 | 5.1   | N | 190 | 51.0 | Y | 190 | 47.3  | Y |
| 5-Methyl-2-hexanone                               | 110-12-3    | e1k | 200 | 3.2   | N | 200 | 1.1  | N | 200 | 3.6   | N |
| Butanedioic acid                                  | 110-15-6    | e1k | 200 | -1.7  | N | 200 | -2.8 | N | 200 | -1.2  | N |
| Maleic acid                                       | 110-16-7    | e1k | 200 | -6.2  | N | 190 | -2.9 | N | 190 | 9.1   | N |
| Fumaric acid                                      | 110-17-8    | e1k | 200 | 5.0   | N | 200 | 0.2  | N | 200 | 8.9   | N |
| Oleyl sarcosine                                   | 110-25-8    | e1k | 200 | 102.5 | Y | 200 | 92.0 | Y | 200 | 100.2 | Y |
| Isopropyl tetradecanoic acid                      | 110-27-0    | e1k | 200 | 1.1   | N | 200 | -4.3 | N | 200 | -7.7  | N |
| Dihexyl hexanedioate                              | 110-33-8    | e1k | 200 | -4.6  | N | 200 | 5.0  | N | 200 | -9.9  | N |
| Methyl decanoate                                  | 110-42-9    | e1k | 200 | -1.0  | N | 200 | -0.4 | N | 200 | 0.3   | N |
| 2-Heptanone                                       | 110-43-0    | e1k | 200 | -4.4  | N | 200 | 2.9  | N | 200 | 6.8   | N |
| 1,4-Butanediol                                    | 110-63-4    | e1k | 200 | -1.1  | N | 200 | -0.5 | N | 200 | -4.0  | N |
| 2-Butyne-1,4-diol                                 | 110-65-6    | e1k | 200 | 7.1   | N | 190 | 12.3 | N | 190 | 13.2  | N |
| Butanal oxime                                     | 110-69-0    | e1k | 200 | -1.6  | N | 200 | -1.8 | N | 200 | 4.1   | N |
| 2-(Ethylamino)ethanol                             | 110-73-6    | e1k | 200 | -0.1  | N | 200 | 6.3  | N | 200 | 7.0   | N |
| 3,4-Dihydro-2H-pyran                              | 110-87-2    | e1k | 200 | -1.0  | N | 190 | 12.3 | N | 190 | -5.7  | N |
| Morpholine                                        | 110-91-8    | e1k | 200 | -2.3  | N | 190 | 2.3  | N | 190 | 4.2   | N |
| Diisopropanolamine                                | 110-97-4    | e1k | 200 | -2.6  | N | 200 | 7.8  | N | 200 | 7.3   | N |
| Glyceryl stearates                                | 11099-07-3  | e1k | 200 | -5.0  | N | 200 | 2.8  | N | 200 | 3.5   | N |
| Decanedioic acid                                  | 111-20-6    | e1k | 200 | -1.7  | N | 200 | 1.4  | N | 200 | 10.4  | N |
| 1-Hexanol                                         | 111-27-3    | e1k | 200 | -3.1  | N | 190 | 1.9  | N | 190 | 7.8   | N |
| Diethylenetriamine                                | 111-40-0    | e1k | 200 | 0.1   | N | 190 | -0.5 | N | 190 | 1.6   | N |

|                                      |             |     |     |       |   |     |       |   |     |       |   |
|--------------------------------------|-------------|-----|-----|-------|---|-----|-------|---|-----|-------|---|
| Hexamethylenimine                    | 111-49-9    | e1k | 200 | 0.8   | N | 190 | -4.9  | N | 190 | -0.7  | N |
| 1,2-Ethandiol diacetate              | 111-55-7    | e1k | 200 | 2.9   | N | 200 | -2.6  | N | 200 | -5.5  | N |
| Ethyl oleate                         | 111-62-6    | e1k | 200 | 13.7  | N | 200 | 10.9  | N | 200 | 20.9  | N |
| 1-Heptanol                           | 111-70-6    | e1k | 200 | -0.3  | N | 200 | -2.3  | N | 200 | 9.4   | N |
| Heptanal                             | 111-71-7    | e1k | 200 | -1.5  | N | 200 | 11.9  | N | 200 | 22.9  | N |
| Nonane                               | 111-84-2    | e1k | 200 | -5.0  | N | 200 | 2.2   | N | 200 | 11.4  | N |
| Dimethoxydimethylsilane              | 1112-39-6   | e1k | 200 | -2.9  | N | 200 | 0.2   | N | 200 | 1.0   | N |
| Pebulate                             | 1114-71-2   | e1k | 200 | 4.0   | N | 200 | 1.4   | N | 200 | -6.0  | N |
| Butyltin trichloride                 | 1118-46-3   | e1k | 200 | -2.1  | N | 200 | 21.3  | N | 200 | 20.2  | N |
| N,N-Dimethyloctanamide               | 1118-92-9   | e1k | 200 | -2.2  | N | 200 | -0.4  | N | 200 | -3.2  | N |
| Nicosulfuron                         | 111991-09-4 | e1k | 200 | -7.3  | N | 200 | -0.7  | N | 200 | 2.0   | N |
| 2-Butoxyethyl acetate                | 112-07-2    | e1k | 200 | -2.6  | N | 200 | 1.0   | N | 200 | -7.6  | N |
| 2-Undecanone                         | 112-12-9    | e1k | 200 | 3.8   | N | 200 | 2.2   | N | 200 | 6.7   | N |
| Octyl acetate                        | 112-14-1    | e1k | 200 | 1.6   | N | 200 | 2.5   | N | 200 | -0.3  | N |
| N,N-Dimethyldodecan-1-amine          | 112-18-5    | e1k | 200 | 18.3  | N | 200 | -2.5  | N | 200 | 3.7   | N |
| Decanal                              | 112-31-2    | e1k | 200 | -7.1  | N | 200 | 1.7   | N | 200 | -2.9  | N |
| 2-[2-(2-Methoxyethoxy)ethoxy]ethanol | 112-35-6    | e1k | 200 | -5.3  | N | 200 | -5.0  | N | 200 | -6.3  | N |
| 1-Dodecanethiol                      | 112-55-0    | e1k | 200 | -2.6  | N | 200 | 4.4   | N | 200 | 30.2  | N |
| Tetraethylene glycol                 | 112-60-7    | e1k | 200 | 9.0   | N | 200 | 1.9   | N | 200 | -1.6  | N |
| Methyl linoleate                     | 112-63-0    | e1k | 200 | 52.9  | Y | 200 | 77.9  | Y | 200 | 89.2  | Y |
| Oleic acid                           | 112-80-1    | e1k | 200 | 98.7  | Y | 200 | 94.4  | Y | 200 | 97.0  | Y |
| Octadecyl sulfate sodium salt        | 1120-04-3   | e1k | 200 | 100.2 | Y | 200 | 104.8 | Y | 200 | 96.2  | Y |
| Halofenozide                         | 112226-61-6 | e1k | 200 | 5.4   | N | 200 | -1.7  | N | 200 | 1.6   | N |
| Letrozole                            | 112809-51-5 | e1k | 140 | -0.5  | N | 140 | 10.7  | N | 140 | 2.4   | N |
| Bromophenol blue                     | 115-39-9    | e1k | 190 | 73.3  | Y | 180 | 76.6  | Y | 180 | 88.5  | Y |
| Linalyl acetate                      | 115-95-7    | e1k | 200 | 12.9  | N | 200 | -1.9  | N | 200 | -5.7  | N |
| 3,3,5-Trimethylcyclohexanol          | 116-02-9    | e1k | 200 | 3.7   | N | 200 | 3.5   | N | 200 | -1.4  | N |
| Bromuconazole                        | 116255-48-2 | e1k | 200 | 2.3   | N | 200 | 1.3   | N | 200 | -11.8 | N |
| Dodecyl gallate                      | 1166-52-5   | e1k | 200 | 91.3  | Y | 200 | 85.3  | Y | 200 | 99.4  | Y |
| Tetrachlorophthalic anhydride        | 117-08-8    | e1k | 200 | 1.7   | N | 200 | 4.2   | N | 200 | 11.2  | N |
| Dichlone                             | 117-80-6    | e1k | 200 | 79.8  | Y | 200 | 87.8  | Y | 200 | 89.5  | Y |
| 2-Hydroxybenzophenone                | 117-99-7    | e1k | 200 | -1.8  | N | 200 | -2.5  | N | 200 | -4.7  | N |
| Pyrazolone T                         | 118-47-8    | e1k | 200 | 61.7  | Y | 200 | 6.0   | N | 200 | 2.6   | N |
| Phenyl salicylate                    | 118-55-8    | e1k | 200 | -0.5  | N | 200 | 8.2   | N | 200 | 32.6  | N |
| 3,3,5-Trimethylcyclohexyl salicylate | 118-56-9    | e1k | 200 | 1.8   | N | 200 | 2.0   | N | 200 | 1.7   | N |
| Benzyl salicylate                    | 118-58-1    | e1k | 200 | -1.4  | N | 200 | -0.4  | N | 200 | 7.3   | N |
| 2,4,6-Tribromophenol                 | 118-79-6    | e1k | 200 | 8.3   | N | 200 | 24.9  | N | 200 | 14.8  | N |



|                                                |             |     |     |       |   |     |      |   |     |       |   |
|------------------------------------------------|-------------|-----|-----|-------|---|-----|------|---|-----|-------|---|
| 4,4'-Methylenebis(2,6-di-t-butylphenol)        | 118-82-1    | e1k | 200 | 1.6   | N | 200 | 5.7  | N | 200 | 11.2  | N |
| 2-Hydroxyacetophenone                          | 118-93-4    | e1k | 200 | -0.9  | N | 200 | -5.7 | N | 200 | -1.2  | N |
| 1,3-Butyleneglycol dimethacrylate              | 1189-08-8   | e1k | 200 | 15.1  | N | 200 | 63.9 | Y | 200 | 57.0  | Y |
| Octyl decyl phthalate                          | 119-07-3    | e1k | 200 | -0.9  | N | 200 | 0.1  | N | 200 | 0.1   | N |
| 2,2'-Methylenebis(4-methyl-6-tert-butylphenol) | 119-47-1    | e1k | 200 | 26.7  | N | 200 | 56.5 | Y | 200 | 83.4  | Y |
| Benzoin                                        | 119-53-9    | e1k | 200 | -1.7  | N | 200 | 8.2  | N | 200 | 0.5   | N |
| Tetralin                                       | 119-64-2    | e1k | 200 | 4.1   | N | 200 | 0.4  | N | 200 | -2.9  | N |
| 4,5-Dichloro-3H-1,2-dithiol-3-one              | 1192-52-5   | e1k | 200 | 103.8 | Y | 200 | 88.6 | Y | 200 | 94.8  | Y |
| Veratraldehyde                                 | 120-14-9    | e1k | 200 | 2.6   | N | 200 | -5.6 | N | 200 | -6.7  | N |
| Naphthalene-2-sulfonic acid                    | 120-18-3    | e1k | 200 | -1.4  | N | 200 | 0.5  | N | 200 | 2.7   | N |
| 1,3-Diphenyl-1,3-propanedione                  | 120-46-7    | e1k | 200 | -1.6  | N | 200 | -1.2 | N | 200 | 3.8   | N |
| Benzyl benzoate                                | 120-51-4    | e1k | 200 | 2.7   | N | 200 | -2.2 | N | 200 | -4.2  | N |
| Triethylene glycol dibenzoate                  | 120-56-9    | e1k | 200 | 4.0   | N | 200 | 1.7  | N | 200 | -3.3  | N |
| 2-((Dimethylamino)methyl)phenol                | 120-65-0    | e1k | 200 | -0.8  | N | 200 | -7.6 | N | 200 | -0.6  | N |
| Indole                                         | 120-72-9    | e1k | 200 | -2.2  | N | 190 | 13.8 | N | 190 | -4.3  | N |
| Cyclopentanone                                 | 120-92-3    | e1k | 200 | 3.2   | N | 200 | -2.4 | N | 200 | 4.3   | N |
| Anastrozole                                    | 120511-73-1 | e1k | 70  | -0.6  | N | 60  | 1.7  | N | 60  | -9.6  | N |
| 3-Ethoxy-4-hydroxybenzaldehyde                 | 121-32-4    | e1k | 200 | 3.7   | N | 200 | 2.2  | N | 200 | 3.3   | N |
| Ethyl 3-phenylglycidate                        | 121-39-1    | e1k | 200 | -4.3  | N | 200 | 26.1 | N | 200 | 42.2  | N |
| (Methylcyclopentadienyl)tricarbonylmanganese   | 12108-13-3  | e1k | 200 | 1.0   | N | 200 | -4.1 | N | 200 | 5.6   | N |
| N-Benzyladenine                                | 1214-39-7   | e1k | 200 | -7.1  | N | 200 | -3.0 | N | 200 | -4.6  | N |
| Octylparaben                                   | 1219-38-1   | e1k | 200 | 105.8 | Y | 200 | 85.5 | Y | 200 | 97.5  | Y |
| Triisopropanolamine                            | 122-20-3    | e1k | 200 | -9.1  | N | 200 | -1.8 | N | 200 | 9.7   | N |
| Pentylcinnamaldehyde                           | 122-40-7    | e1k | 200 | 2.3   | N | 200 | 41.1 | Y | 200 | 76.1  | Y |
| Propham                                        | 122-42-9    | e1k | 200 | 3.5   | N | 200 | 1.3  | N | 200 | -3.4  | N |
| Ethyl orthoformate                             | 122-51-0    | e1k | 200 | -3.5  | N | 200 | 1.9  | N | 200 | -0.3  | N |
| Methyl styryl ketone                           | 122-57-6    | e1k | 200 | 4.1   | N | 200 | 40.8 | N | 200 | 41.6  | N |
| Phenylacetaldehyde                             | 122-78-1    | e1k | 200 | 2.8   | N | 200 | 23.2 | Y | 200 | 53.5  | Y |
| 4-Chlorophenoxyacetic acid                     | 122-88-3    | e1k | 200 | -1.3  | N | 200 | 2.5  | N | 200 | -2.3  | N |
| Chlorfenapyr                                   | 122453-73-0 | e1k | 200 | 22.6  | N | 200 | 29.1 | N | 200 | 41.1  | N |
| 4-Morpholinepropanamine                        | 123-00-2    | e1k | 200 | 5.1   | N | 200 | 2.2  | N | 200 | -4.1  | N |
| 2-Ethylhexanal                                 | 123-05-7    | e1k | 210 | -1.3  | N | 200 | 0.6  | N | 200 | -0.7  | N |
| 4-Ethylphenol                                  | 123-07-9    | e1k | 200 | -0.9  | N | 200 | 2.4  | N | 200 | 4.1   | N |
| 4-Methoxybenzaldehyde                          | 123-11-5    | e1k | 200 | 0.1   | N | 200 | -3.5 | N | 200 | -10.9 | N |
| 2,6,8-Trimethyl-4-nonanol                      | 123-17-1    | e1k | 200 | -0.8  | N | 200 | -0.2 | N | 200 | 3.4   | N |
| Ethyl hexanoate                                | 123-66-0    | e1k | 200 | 1.1   | N | 200 | 5.0  | N | 200 | 1.1   | N |
| Azodicarbonamide                               | 123-77-3    | e1k | 200 | 3.1   | N | 200 | 2.4  | N | 200 | -2.6  | N |

|                                                                 |             |     |     |       |   |     |      |   |     |       |   |
|-----------------------------------------------------------------|-------------|-----|-----|-------|---|-----|------|---|-----|-------|---|
| 2-Octanol                                                       | 123-96-6    | e1k | 200 | 4.4   | N | 200 | -6.9 | N | 200 | 1.2   | N |
| Nonanedioic acid                                                | 123-99-9    | e1k | 200 | -1.5  | N | 200 | 2.7  | N | 200 | 7.7   | N |
| 1,6-Hexanediamine                                               | 124-09-4    | e1k | 200 | -3.5  | N | 200 | 3.4  | N | 200 | 1.0   | N |
| Nonanal                                                         | 124-19-6    | e1k | 200 | -1.6  | N | 200 | 13.8 | N | 200 | 11.3  | N |
| 1-Dodecanamine                                                  | 124-22-1    | e1k | 180 | 21.8  | N | 180 | 58.0 | Y | 180 | 78.3  | Y |
| Dimethylamine                                                   | 124-40-3    | e1k | 200 | 2.1   | N | 190 | -3.2 | N | 190 | 2.3   | N |
| 2-Amino-2-methylpropan-1-ol                                     | 124-68-5    | e1k | 200 | 3.3   | N | 200 | 0.0  | N | 200 | -5.8  | N |
| Isoborneol                                                      | 124-76-5    | e1k | 200 | -0.6  | N | 200 | 2.5  | N | 200 | -1.0  | N |
| 2-Ethylhexyl diphenyl phosphate                                 | 1241-94-7   | e1k | 200 | 1.3   | N | 200 | 7.8  | N | 200 | 4.1   | N |
| Isobornyl acetate                                               | 125-12-2    | e1k | 200 | 4.7   | N | 200 | 6.8  | N | 200 | 5.6   | N |
| Aminoglutethimide                                               | 125-84-8    | e1k | 200 | -1.9  | N | 200 | 7.2  | N | 200 | -7.8  | N |
| Metconazole                                                     | 125116-23-6 | e1k | 200 | -2.4  | N | 200 | 1.2  | N | 200 | -11.0 | N |
| Ipconazole                                                      | 125225-28-7 | e1k | 200 | -2.6  | N | 200 | 13.7 | N | 200 | 14.7  | N |
| Bispyribac-sodium                                               | 125401-92-5 | e1k | 200 | -0.9  | N | 200 | -4.8 | N | 200 | -2.1  | N |
| Diphenolic acid                                                 | 126-00-1    | e1k | 200 | 0.7   | N | 200 | 4.9  | N | 200 | 22.2  | N |
| 3-Bromo-1-chloro-5,5-dimethylhydantoin                          | 126-06-7    | e1k | 200 | 1.1   | N | 200 | 2.3  | N | 200 | 4.8   | N |
| 2,2-Dimethylpropane-1,3-diol                                    | 126-30-7    | e1k | 200 | -1.4  | N | 200 | 2.1  | N | 200 | 4.2   | N |
| Tris(2,3-dibromopropyl) phosphate                               | 126-72-7    | e1k | 170 | -4.5  | N | 170 | 4.7  | N | 170 | 5.2   | N |
| Sodium ethasulfate                                              | 126-92-1    | e1k | 200 | 4.3   | N | 200 | 7.5  | N | 200 | 3.5   | N |
| Methacrylonitrile                                               | 126-98-7    | e1k | 200 | 1.8   | N | 190 | -0.7 | N | 190 | 3.0   | N |
| N,N-Dimethylacetamide                                           | 127-19-5    | e1k | 200 | 1.3   | N | 200 | 5.0  | N | 200 | 3.4   | N |
| Methyl abietate                                                 | 127-25-3    | e1k | 200 | -1.9  | N | 200 | 26.1 | Y | 200 | 59.6  | Y |
| Sodium 1,4-diisobutyl sulfosuccinate                            | 127-39-9    | e1k | 200 | -2.3  | N | 200 | 4.6  | N | 200 | 1.0   | N |
| alpha-Ionone                                                    | 127-41-3    | e1k | 200 | -3.5  | N | 200 | 13.2 | N | 200 | 28.1  | N |
| Retinol acetate                                                 | 127-47-9    | e1k | 200 | 13.3  | N | 200 | 49.7 | Y | 200 | 72.3  | Y |
| Butylated hydroxytoluene                                        | 128-37-0    | e1k | 200 | -2.3  | N | 200 | 6.4  | N | 200 | 7.7   | N |
| 1,4-Diaminoanthraquinone                                        | 128-95-0    | e1k | 200 | -6.7  | N | 200 | 3.9  | N | 200 | 4.5   | N |
| Sodium warfarin                                                 | 129-06-6    | e1k | 200 | -0.8  | N | 200 | -2.3 | N | 200 | 0.9   | N |
| Sulfan blue                                                     | 129-17-9    | e1k | 200 | -1.4  | N | 200 | 10.3 | N | 200 | 14.5  | N |
| Sodium 1-naphthalenesulfonate                                   | 130-14-3    | e1k | 200 | -2.1  | N | 200 | 1.5  | N | 200 | 0.4   | N |
| Dimethylaniline                                                 | 1300-73-8   | e1k | 200 | -6.3  | N | 200 | -0.4 | N | 200 | 4.7   | N |
| 2,4-Dihydroxybenzophenone                                       | 131-56-6    | e1k | 200 | -10.4 | N | 200 | 7.9  | N | 200 | -8.2  | N |
| 2-Hydroxy-4-methoxybenzophenone                                 | 131-57-7    | e1k | 200 | 0.4   | N | 200 | 2.0  | N | 200 | -12.2 | N |
| 1-(6-tert-Butyl-1,1-dimethyl-2,3-dihydro-1H-inden-4-yl)ethanone | 13171-00-1  | e1k | 200 | -0.9  | N | 200 | 3.8  | N | 200 | -8.0  | N |
| Dibenzothiophene                                                | 132-65-0    | e1k | 200 | 5.3   | N | 200 | 1.1  | N | 200 | -4.2  | N |
| C.I. Acid Orange 24, monosodium salt                            | 1320-07-6   | e1k | 200 | 70.3  | Y | 200 | 31.7 | Y | 200 | 57.4  | Y |

|                                                  |             |     |     |       |   |     |       |   |     |       |   |
|--------------------------------------------------|-------------|-----|-----|-------|---|-----|-------|---|-----|-------|---|
| Divinylbenzene                                   | 1321-74-0   | e1k | 200 | -4.7  | N | 200 | 3.5   | N | 200 | 5.4   | N |
| Sodium triisopropyl naphthalene sulfonate        | 1323-19-9   | e1k | 200 | 3.3   | N | 200 | 36.8  | N | 200 | 2.8   | N |
| Glyceryl monoricinoleate                         | 1323-38-2   | e1k | 200 | -0.6  | N | 200 | 47.4  | N | 200 | 35.3  | N |
| 2,6-Dimethyl-2-heptanol                          | 13254-34-7  | e1k | 200 | 1.3   | N | 200 | -2.1  | N | 200 | -4.4  | N |
| Tricresyl phosphate                              | 1330-78-5   | e1k | 200 | -3.7  | N | 200 | 8.7   | N | 200 | 4.1   | N |
| Diisooctyl adipate                               | 1330-86-5   | e1k | 200 | 5.1   | N | 200 | -1.7  | N | 200 | 8.2   | N |
| C.I. Disperse Orange 37                          | 13301-61-6  | e1k | 200 | 34.9  | N | 200 | 11.4  | Y | 200 | 77.6  | Y |
| Phenolsulfonic acid                              | 1333-39-7   | e1k | 200 | -1.3  | N | 200 | 1.4   | N | 200 | 6.4   | N |
| Methylionone                                     | 1335-46-2   | e1k | 200 | 8.7   | N | 200 | 43.0  | Y | 200 | 58.0  | Y |
| Epoxiconazole                                    | 133855-98-8 | e1k | 200 | 10.9  | N | 200 | -7.0  | N | 200 | -3.5  | N |
| 8-Hydroxyquinoline sulfate                       | 134-31-6    | e1k | 200 | 5.4   | N | 200 | 8.2   | N | 200 | 9.0   | N |
| Atorvastatin calcium                             | 134523-03-8 | e1k | 180 | -12.0 | N | 170 | 10.1  | N | 170 | 1.3   | N |
| Zinc pyrithione                                  | 13463-41-7  | e1k | 200 | 0.2   | N | 200 | -2.9  | N | 200 | 6.4   | N |
| Cupferron                                        | 135-20-6    | e1k | 200 | -4.2  | N | 200 | 11.0  | N | 200 | 11.7  | N |
| Tris(2-chloroisopropyl)phosphate                 | 13674-84-5  | e1k | 190 | -1.2  | N | 190 | 3.5   | N | 190 | -8.6  | N |
| 4,4'-Methylenebis(2,6-diethylaniline)            | 13680-35-8  | e1k | 200 | 1.9   | N | 200 | -3.1  | N | 200 | -13.1 | N |
| Desmedipham                                      | 13684-56-5  | e1k | 200 | 0.7   | N | 200 | -1.0  | N | 200 | 4.6   | N |
| Phenmedipham                                     | 13684-63-4  | e1k | 200 | 2.9   | N | 200 | -4.0  | N | 200 | 3.6   | N |
| Metam-sodium                                     | 137-42-8    | e1k | 200 | -1.4  | N | 200 | 9.2   | N | 200 | 1.7   | N |
| Ascorbyl palmitate                               | 137-66-6    | e1k | 200 | 94.7  | Y | 200 | 99.1  | Y | 200 | 95.1  | Y |
| Sodium tetrafluoroborate                         | 13755-29-8  | e1k | 200 | -2.6  | N | 200 | 8.7   | N | 200 | 5.3   | N |
| Butyl lactate                                    | 138-22-7    | e1k | 200 | 4.1   | N | 190 | -0.8  | N | 190 | 3.5   | N |
| Limonene                                         | 138-86-3    | e1k | 210 | -2.1  | N | 200 | 7.7   | N | 200 | 5.2   | N |
| 3-Phenoxybenzenemethanol                         | 13826-35-2  | e1k | 200 | -3.1  | N | 200 | -2.5  | N | 200 | -3.3  | N |
| Sodium phenolate                                 | 139-02-6    | e1k | 200 | 30.1  | N | 190 | 16.1  | N | 190 | -0.3  | N |
| Ethyl diethanolamine                             | 139-87-7    | e1k | 200 | -4.1  | N | 200 | 1.5   | N | 200 | 10.6  | N |
| 7-Ethyl-2-methyl-4-undecanolsulfate, sodium salt | 139-88-8    | e1k | 200 | 1.2   | N | 190 | 26.0  | N | 190 | -6.6  | N |
| Tris(2-chloroethyl) phosphite                    | 140-08-9    | e1k | 200 | -0.9  | N | 200 | 3.6   | N | 200 | 4.6   | N |
| E-Cinnamic acid                                  | 140-10-3    | e1k | 200 | -1.8  | N | 200 | -2.4  | N | 200 | 4.6   | N |
| Benzyl acetate                                   | 140-11-4    | e1k | 200 | -3.9  | N | 200 | -4.5  | N | 200 | 9.9   | N |
| 1-(2-Aminoethyl)piperazine                       | 140-31-8    | e1k | 200 | 1.8   | N | 200 | -0.9  | N | 200 | 4.7   | N |
| 4-Chlorophenylurea                               | 140-38-5    | e1k | 200 | -2.0  | N | 190 | -34.7 | N | 190 | 0.6   | N |
| Estragole                                        | 140-67-0    | e1k | 200 | -2.0  | N | 200 | 3.6   | N | 200 | 0.4   | N |
| Dimethylolurea                                   | 140-95-4    | e1k | 200 | -0.3  | N | 190 | 4.7   | N | 190 | 4.7   | N |
| (9Z,12R)-12-Hydroxyoctadec-9-enoic acid          | 141-22-0    | e1k | 200 | 5.4   | N | 200 | 41.0  | N | 200 | 19.3  | N |
| Butyl acrylate                                   | 141-32-2    | e1k | 200 | 0.1   | N | 200 | 2.2   | N | 200 | 5.7   | N |
| 4-Methylpent-3-en-2-one                          | 141-79-7    | e1k | 200 | -3.1  | N | 200 | 3.0   | N | 200 | 1.6   | N |

|                                                    |             |     |     |      |   |     |      |   |     |      |   |
|----------------------------------------------------|-------------|-----|-----|------|---|-----|------|---|-----|------|---|
| Aniline hydrochloride                              | 142-04-1    | e1k | 200 | 2.1  | N | 200 | -0.7 | N | 200 | 10.1 | N |
| Bis(2-ethylhexyl) maleate                          | 142-16-5    | e1k | 200 | 5.3  | N | 200 | 14.0 | N | 200 | 21.9 | N |
| 1-Monolaurin                                       | 142-18-7    | e1k | 200 | 15.7 | N | 200 | 41.5 | N | 200 | 46.6 | N |
| Sodium octyl sulfate                               | 142-31-4    | e1k | 200 | -0.4 | N | 200 | 2.3  | N | 200 | 1.2  | N |
| 1,4-Bis(N-isopropylamino)anthraquinone             | 14233-37-5  | e1k | 110 | -0.5 | N | 100 | -4.8 | N | 100 | 7.7  | N |
| 1-Nonanol                                          | 143-08-8    | e1k | 200 | -0.2 | N | 200 | -0.1 | N | 200 | 6.8  | N |
| 2-[2-(2-Butoxyethoxy)ethoxy]ethanol                | 143-22-6    | e1k | 200 | -1.3 | N | 200 | -4.1 | N | 200 | 7.8  | N |
| Phenol red                                         | 143-74-8    | e1k | 200 | 10.6 | N | 200 | 41.0 | Y | 200 | 47.8 | Y |
| Kresoxim-methyl                                    | 143390-89-0 | e1k | 200 | -2.5 | N | 200 | 0.6  | N | 200 | -2.2 | N |
| Pregnenolone carbonitrile                          | 1434-54-4   | e1k | 120 | -2.0 | N | 110 | -6.7 | N | 110 | -2.3 | N |
| Sodium abietate                                    | 14351-66-7  | e1k | 200 | 29.1 | N | 200 | 33.8 | Y | 200 | 61.4 | Y |
| (2E)-3-Phenylprop-2-enal                           | 14371-10-9  | e1k | 200 | 0.9  | N | 200 | 30.7 | N | 200 | 47.9 | N |
| Fluoroacetic acid                                  | 144-49-0    | e1k | 200 | -2.8 | N | 200 | -3.2 | N | 200 | 0.4  | N |
| Oxalic acid                                        | 144-62-7    | e1k | 200 | -0.3 | N | 200 | 2.5  | N | 200 | 2.5  | N |
| Dimethyl isophthalate                              | 1459-93-4   | e1k | 200 | 2.9  | N | 200 | -4.9 | N | 200 | -2.3 | N |
| Tetrabutyltin                                      | 1461-25-2   | e1k | 200 | -4.1 | N | 200 | 11.7 | N | 200 | 0.5  | N |
| Arabinose                                          | 147-81-9    | e1k | 200 | -2.5 | N | 200 | 11.1 | N | 200 | 3.5  | N |
| 2-sec-Butylcyclohexanone                           | 14765-30-1  | e1k | 200 | -9.7 | N | 200 | -0.7 | N | 200 | -2.9 | N |
| 1,3-Benzenedimethanamine                           | 1477-55-0   | e1k | 200 | 0.9  | N | 200 | 4.2  | N | 200 | 10.5 | N |
| Phoxim                                             | 14816-18-3  | e1k | 200 | -1.4 | N | 200 | 6.5  | N | 200 | 8.0  | N |
| Menthol                                            | 1490-04-6   | e1k | 200 | -0.4 | N | 200 | -1.8 | N | 200 | -0.9 | N |
| 4-(2,6,6-Trimethyl-cyclohex-1-enyl)-but-3-en-2-one | 14901-07-6  | e1k | 200 | -2.9 | N | 200 | 13.0 | N | 200 | 27.2 | N |
| 4-Methoxyphenol                                    | 150-76-5    | e1k | 200 | 2.2  | N | 200 | 2.1  | N | 200 | 0.7  | N |
| Hydroquinone dimethyl ether                        | 150-78-7    | e1k | 200 | 1.9  | N | 200 | 2.5  | N | 200 | 10.8 | N |
| Sodium 2-methylbenzenesulfonate                    | 15046-75-0  | e1k | 200 | -2.7 | N | 200 | 2.0  | N | 200 | 2.5  | N |
| Dimethylbenzylcarbonyl acetate                     | 151-05-3    | e1k | 200 | 0.7  | N | 200 | -1.1 | N | 200 | 0.0  | N |
| 2-Acrylamido-2-methyl-1-propanesulfonic acid       | 15214-89-8  | e1k | 200 | -4.5 | N | 200 | -1.4 | N | 200 | 3.7  | N |
| 4-Dodecylmorpholine                                | 1541-81-7   | e1k | 200 | 0.5  | N | 200 | 1.6  | N | 200 | -6.4 | N |
| 4-Butylchlorobenzene                               | 15499-27-1  | e1k | 200 | -1.5 | N | 200 | 4.7  | N | 200 | -0.5 | N |
| 3,6,9,12-Tetraoxahexadecan-1-ol                    | 1559-34-8   | e1k | 200 | -0.7 | N | 200 | -6.6 | N | 200 | -1.1 | N |
| 2-(2-Ethylhexyloxy)ethanol                         | 1559-35-9   | e1k | 200 | 2.4  | N | 200 | 1.9  | N | 200 | 0.2  | N |
| 4-Nitrosodiphenylamine                             | 156-10-5    | e1k | 200 | 36.2 | N | 200 | 50.7 | Y | 200 | 28.5 | Y |
| 4-Ethoxyaniline                                    | 156-43-4    | e1k | 200 | -0.3 | N | 200 | 3.5  | N | 200 | 6.0  | N |
| (E)-1,2-Dichloroethylene                           | 156-60-5    | e1k | 200 | -1.6 | N | 190 | 2.2  | N | 190 | -1.3 | N |
| 2,3-Dihydro-2,2-dimethyl-7-benzofuranol            | 1563-38-8   | e1k | 200 | -4.3 | N | 200 | -1.6 | N | 200 | 5.2  | N |
| 1-Propoxy-2-propanol                               | 1569-01-3   | e1k | 200 | 0.5  | N | 200 | -1.3 | N | 200 | -0.2 | N |
| 1-Ethoxy-2-propanol                                | 1569-02-4   | e1k | 200 | 2.0  | N | 200 | -3.6 | N | 200 | 3.6  | N |

|                                                    |             |     |     |       |   |     |      |   |     |       |   |
|----------------------------------------------------|-------------|-----|-----|-------|---|-----|------|---|-----|-------|---|
| 4-Chloro-2-methylphenol                            | 1570-64-5   | e1k | 200 | -8.9  | N | 200 | -1.7 | N | 200 | 2.0   | N |
| Ethylenediaminetetraacetic acid ferric sodium salt | 15708-41-5  | e1k | 200 | 1.5   | N | 200 | 8.4  | N | 200 | 24.3  | N |
| 1-Bromo-3-chloro-5,5-dimethylhydantoin             | 16079-88-2  | e1k | 200 | -2.3  | N | 200 | -1.2 | N | 200 | 4.6   | N |
| 5-Ethylidene-2-norbornene                          | 16219-75-3  | e1k | 200 | 11.2  | N | 200 | 46.3 | Y | 200 | 65.5  | Y |
| 4,4'-Di-tert-butylbiphenyl                         | 1625-91-8   | e1k | 200 | -2.7  | N | 200 | 0.3  | N | 200 | -3.5  | N |
| Fenchol                                            | 1632-73-1   | e1k | 200 | 0.9   | N | 200 | 8.8  | N | 200 | 2.8   | N |
| Isoxadifen-ethyl                                   | 163520-33-0 | e1k | 200 | 0.1   | N | 200 | -2.1 | N | 200 | 1.2   | N |
| 4-Butylphenol                                      | 1638-22-8   | e1k | 200 | -1.3  | N | 200 | 6.1  | N | 200 | -11.3 | N |
| Aldicarb sulfoxide                                 | 1646-87-3   | e1k | 200 | -4.2  | N | 200 | -0.7 | N | 200 | -2.5  | N |
| Aldoxycarb                                         | 1646-88-4   | e1k | 200 | 0.1   | N | 200 | -1.7 | N | 200 | 4.5   | N |
| Dinotefuran                                        | 165252-70-0 | e1k | 190 | -0.8  | N | 190 | -1.9 | N | 190 | 0.6   | N |
| 4-(tert-Pentyl)-cyclohexanone                      | 16587-71-6  | e1k | 200 | -1.4  | N | 200 | 11.9 | N | 200 | 2.9   | N |
| Heptanophenone                                     | 1671-75-6   | e1k | 200 | -1.1  | N | 200 | 1.8  | N | 200 | 0.2   | N |
| Bisphenol A diglycidyl ether                       | 1675-54-3   | e1k | 200 | 102.7 | Y | 200 | 94.8 | Y | 200 | 88.6  | Y |
| Sodium hexafluorosilicate                          | 16893-85-9  | e1k | 200 | -5.7  | N | 200 | -3.3 | N | 200 | 2.7   | N |
| Cyclododecanol                                     | 1724-39-6   | e1k | 200 | -3.3  | N | 200 | -1.0 | N | 200 | -16.7 | N |
| 1,1-Bis(3,4-dimethylphenyl)ethane                  | 1742-14-9   | e1k | 200 | 0.4   | N | 200 | 0.6  | N | 200 | 4.0   | N |
| gamma-Cyclodextrin                                 | 17465-86-0  | e1k | 80  | 6.4   | N | 70  | 5.8  | N | 70  | 6.5   | N |
| N-[3-(Trimethoxysilyl)propyl]ethane-1,2-diamine    | 1760-24-3   | e1k | 200 | -14.5 | N | 200 | -1.9 | N | 200 | -1.9  | N |
| Phenylparaben                                      | 17696-62-7  | e1k | 200 | 15.5  | N | 200 | 48.1 | Y | 200 | 61.4  | Y |
| N-(Cyclohexylthio)phthalimide                      | 17796-82-6  | e1k | 200 | 33.3  | N | 200 | 19.4 | N | 200 | 27.5  | N |
| Zearalenone                                        | 17924-92-4  | e1k | 200 | 1.5   | N | 200 | 6.5  | N | 200 | -32.6 | N |
| Flucarbazono-sodium                                | 181274-17-9 | e1k | 190 | -4.1  | N | 180 | -2.3 | N | 180 | -3.9  | N |
| (-)-beta-Pinene                                    | 18172-67-3  | e1k | 200 | -5.5  | N | 200 | -1.6 | N | 200 | 3.5   | N |
| Pentachloroanisole                                 | 1825-21-4   | e1k | 200 | -1.0  | N | 200 | 3.2  | N | 200 | -3.4  | N |
| 1,1,1,3,5,5,5-Heptamethyltrisiloxane               | 1873-88-7   | e1k | 200 | 1.3   | N | 200 | -7.9 | N | 200 | 2.6   | N |
| 2,2'-(Tetradecylimino)diethanol                    | 18924-66-8  | e1k | 200 | 94.5  | Y | 200 | 92.6 | Y | 200 | 96.1  | Y |
| 4-(Hexyloxy)phenol                                 | 18979-55-0  | e1k | 200 | -4.1  | N | 200 | 9.3  | N | 200 | -7.7  | N |
| N-Butyl-p-toluenesulfonamide                       | 1907-65-9   | e1k | 200 | 0.2   | N | 200 | -4.0 | N | 200 | -2.2  | N |
| Propachlor                                         | 1918-16-7   | e1k | 200 | 83.1  | Y | 200 | 46.1 | N | 200 | 35.1  | N |
| 2,4-D-Butotyl                                      | 1929-73-3   | e1k | 200 | 4.7   | N | 200 | 4.4  | N | 200 | -2.6  | N |
| C.I. Acid Orange 10                                | 1936-15-8   | e1k | 200 | 2.4   | N | 200 | -0.7 | N | 200 | -2.8  | N |
| (2-Dodeceny)succinic anhydride                     | 19780-11-1  | e1k | 200 | 51.8  | Y | 200 | 52.3 | Y | 200 | 56.9  | Y |
| 1-Methoxy-4-tert-pentylcyclohexane                 | 199584-38-8 | e1k | 200 | -4.6  | N | 200 | 3.4  | N | 200 | 0.0   | N |
| 1-Decanamine                                       | 2016-57-1   | e1k | 200 | 4.5   | N | 200 | 5.7  | N | 200 | -13.0 | N |
| 4-Methoxyaniline hydrochloride                     | 20265-97-8  | e1k | 200 | -2.8  | N | 200 | 5.1  | N | 200 | 17.7  | N |
| Triethoxymethylsilane                              | 2031-67-6   | e1k | 200 | -0.3  | N | 200 | 2.7  | N | 200 | 5.6   | N |

|                                         |             |     |     |      |   |     |      |   |     |       |   |
|-----------------------------------------|-------------|-----|-----|------|---|-----|------|---|-----|-------|---|
| N,N-Dimethylacetoacetamide              | 2044-64-6   | e1k | 200 | 2.4  | N | 200 | -1.4 | N | 200 | -6.3  | N |
| Propofol                                | 2078-54-8   | e1k | 200 | 4.3  | N | 200 | 2.0  | N | 200 | 2.5   | N |
| 3,7-Dimethyloctan-3-yl acetate          | 20780-48-7  | e1k | 200 | 0.0  | N | 200 | -3.5 | N | 200 | 1.2   | N |
| Digoxin                                 | 20830-75-5  | e1k | 140 | 0.9  | N | 130 | -1.1 | N | 130 | 11.7  | N |
| Topramezone                             | 210631-68-8 | e1k | 90  | -0.6 | N | 80  | -3.7 | N | 80  | 11.8  | N |
| 2-(3-Phenylpropyl)pyridine              | 2110-18-1   | e1k | 200 | -3.3 | N | 200 | -0.4 | N | 200 | -2.6  | N |
| 6-Acetyl-1,1,2,4,4,7-hexamethyltetralin | 21145-77-7  | e1k | 200 | 1.4  | N | 200 | 10.6 | N | 200 | -8.9  | N |
| Ethyl 1-naphthaleneacetate              | 2122-70-5   | e1k | 200 | 4.0  | N | 200 | 0.5  | N | 200 | -7.8  | N |
| 2-Ethylhexyl 4-(dimethylamino)benzoate  | 21245-02-3  | e1k | 200 | -1.5 | N | 200 | 7.9  | N | 200 | 14.9  | N |
| (4Z)-4-Decenal                          | 21662-09-9  | e1k | 200 | -2.3 | N | 200 | 36.1 | N | 200 | 16.0  | N |
| 2-Ethylhexyl octadecanoate              | 22047-49-0  | e1k | 200 | -2.8 | N | 200 | 9.7  | N | 200 | 4.4   | N |
| Z-Tetrachlorvinphos                     | 22248-79-9  | e1k | 200 | 95.5 | Y | 200 | 31.9 | N | 200 | 41.6  | N |
| Bromocriptine mesylate                  | 22260-51-1  | e1k | 70  | -2.3 | N | 60  | 5.5  | N | 60  | 18.8  | N |
| Potassium dichloroisocyanurate          | 2244-21-5   | e1k | 200 | 0.6  | N | 200 | 2.0  | N | 200 | 0.6   | N |
| Aspartame                               | 22839-47-0  | e1k | 200 | 1.5  | N | 200 | 2.7  | N | 200 | 14.0  | N |
| Levomenol                               | 23089-26-1  | e1k | 200 | -5.8 | N | 200 | 34.5 | N | 200 | 9.8   | N |
| Fluorescein                             | 2321-07-5   | e1k | 200 | 1.2  | N | 200 | 1.5  | N | 200 | 6.7   | N |
| Dicyclohexyl sodium sulfosuccinate      | 23386-52-9  | e1k | 200 | 0.9  | N | 200 | 3.8  | N | 200 | -9.7  | N |
| FD&C Green No. 3                        | 2353-45-9   | e1k | 130 | 58.9 | Y | 130 | 53.3 | Y | 130 | 74.2  | Y |
| Thiophanate                             | 23564-06-9  | e1k | 200 | 29.0 | N | 200 | 3.7  | N | 200 | -4.1  | N |
| UT-632                                  | 2386-87-0   | e1k | 200 | -2.5 | N | 200 | 10.0 | N | 200 | 41.8  | N |
| Basic Blue 7                            | 2390-60-5   | e1k | 200 | 10.9 | N | 200 | 80.7 | Y | 200 | 95.5  | Y |
| 4-tert-Butylbenzenethiol                | 2396-68-1   | e1k | 200 | 62.3 | Y | 200 | 0.9  | N | 200 | 12.7  | N |
| 2-tert-Butyl-4-methylphenol             | 2409-55-4   | e1k | 200 | 0.7  | N | 200 | 14.1 | N | 200 | -8.9  | N |
| 2,6-Diisopropyl-naphthalene             | 24157-81-1  | e1k | 200 | 4.3  | N | 200 | 0.8  | N | 200 | 1.9   | N |
| Econazole nitrate                       | 24169-02-6  | e1k | 200 | -3.2 | N | 200 | 52.9 | Y | 200 | 10.5  | Y |
| 2-Hexyl-1-decanol                       | 2425-77-6   | e1k | 200 | 1.1  | N | 200 | 1.1  | N | 200 | -2.3  | N |
| Butyl glycidyl ether                    | 2426-08-6   | e1k | 200 | -0.1 | N | 200 | -0.2 | N | 200 | -2.0  | N |
| 2-(2H-Benzotriazol-2-yl)-4-methylphenol | 2440-22-4   | e1k | 200 | -0.3 | N | 200 | 3.4  | N | 200 | 0.3   | N |
| 2-Methylbutyl isovalerate               | 2445-77-4   | e1k | 200 | 7.4  | N | 200 | -2.6 | N | 200 | -2.5  | N |
| 2-Ethyl-6-methylaniline                 | 24549-06-2  | e1k | 200 | -1.8 | N | 200 | 3.3  | N | 200 | 2.3   | N |
| Barium bis(2-ethylhexanoate)            | 2457-01-4   | e1k | 200 | 1.0  | N | 200 | 3.3  | N | 200 | 4.0   | N |
| Auramine hydrochloride                  | 2465-27-2   | e1k | 200 | 9.0  | N | 200 | 6.4  | N | 200 | 4.3   | N |
| 2,2'-Bisphenol F                        | 2467-02-9   | e1k | 200 | 1.8  | N | 200 | 13.4 | N | 200 | -11.9 | N |
| Tripropylene glycol                     | 24800-44-0  | e1k | 200 | 1.2  | N | 200 | -0.7 | N | 200 | 0.8   | N |
| Methyl dihydrojasmonate                 | 24851-98-7  | e1k | 200 | 3.6  | N | 200 | 3.4  | N | 200 | -0.2  | N |
| 2-Bromo-4-hydroxyacetophenone           | 2491-38-5   | e1k | 200 | 0.9  | N | 200 | 14.5 | N | 200 | 44.4  | N |

|                                                          |             |     |     |       |   |     |      |   |     |       |   |
|----------------------------------------------------------|-------------|-----|-----|-------|---|-----|------|---|-----|-------|---|
| Sodium 2-mercaptobenzothiolate                           | 2492-26-4   | e1k | 200 | 23.6  | N | 200 | 26.6 | Y | 200 | 53.4  | Y |
| Methylbenzethonium chloride                              | 25155-18-4  | e1k | 200 | 103.1 | Y | 200 | 98.7 | Y | 200 | 103.8 | Y |
| Chlorotoluene                                            | 25168-05-2  | e1k | 200 | -2.7  | N | 200 | 0.6  | N | 200 | 8.8   | N |
| Polypropylene glycol                                     | 25322-69-4  | e1k | 200 | 0.9   | N | 200 | -3.1 | N | 200 | 8.0   | N |
| tert-Nonanethiol                                         | 25360-10-5  | e1k | 200 | 10.6  | N | 200 | -0.4 | N | 200 | 2.4   | N |
| Glyceryl monooleate                                      | 25496-72-4  | e1k | 200 | 31.8  | N | 200 | 71.2 | Y | 200 | 78.0  | Y |
| 1,3,5,7-Tetramethyl-1,3,5,7-tetравinylcyclotetrasiloxane | 2554-06-5   | e1k | 200 | 0.8   | N | 200 | -0.1 | N | 200 | -2.6  | N |
| Diisodecylphenyl phosphite                               | 25550-98-5  | e1k | 200 | 5.8   | N | 200 | 6.4  | N | 200 | -12.9 | N |
| Butylphthalenesulfonic acid sodium salt                  | 25638-17-9  | e1k | 200 | 0.0   | N | 200 | 18.3 | N | 200 | -14.0 | N |
| Gemfibrozil                                              | 25812-30-0  | e1k | 200 | 3.2   | N | 200 | 5.0  | N | 200 | -3.8  | N |
| Phenothrin                                               | 26002-80-2  | e1k | 200 | -2.8  | N | 200 | 3.7  | N | 200 | 0.3   | N |
| Bis(2-ethylhexyl) tetrabromophthalate                    | 26040-51-7  | e1k | 150 | 2.3   | N | 140 | 3.5  | N | 140 | 3.1   | N |
| C.I. Direct Red 81 disodium salt                         | 2610-11-9   | e1k | 200 | 41.2  | N | 200 | 21.2 | N | 200 | 34.4  | N |
| Calcium dodecylbenzene sulfonate                         | 26264-06-2  | e1k | 200 | 101.0 | Y | 200 | 98.8 | Y | 200 | 102.6 | Y |
| 1,3-Divinyl-1,1,3,3-tetramethyl disiloxane               | 2627-95-4   | e1k | 200 | -2.6  | N | 200 | -1.7 | N | 200 | 4.1   | N |
| Glyceryl monooctanoate                                   | 26402-26-6  | e1k | 200 | -2.8  | N | 200 | -0.7 | N | 200 | 0.1   | N |
| Ammonium xylene sulfonate                                | 26447-10-9  | e1k | 200 | -1.7  | N | 200 | 3.6  | N | 200 | 4.0   | N |
| Triforine                                                | 26644-46-2  | e1k | 200 | -1.5  | N | 200 | 14.4 | N | 200 | 20.3  | N |
| N-Octyl-2-pyrrolidone                                    | 2687-94-7   | e1k | 200 | -2.7  | N | 200 | -7.8 | N | 200 | 0.8   | N |
| Neodecanoic acid                                         | 26896-20-8  | e1k | 200 | -2.5  | N | 200 | 6.3  | N | 200 | 3.7   | N |
| Triallyl trimellitate                                    | 2694-54-4   | e1k | 200 | 1.0   | N | 200 | 5.1  | N | 200 | 4.5   | N |
| 4-Propylaniline                                          | 2696-84-6   | e1k | 200 | 0.8   | N | 200 | 0.5  | N | 200 | -2.0  | N |
| 2,4-D sodium salt                                        | 2702-72-9   | e1k | 200 | -0.6  | N | 200 | 0.5  | N | 200 | 0.3   | N |
| N,N,N',N'-Tetrabutyl-1,6-hexanediamine                   | 27090-63-7  | e1k | 200 | -5.1  | N | 200 | 0.6  | N | 200 | 10.2  | N |
| Dodecylphenol                                            | 27193-86-8  | e1k | 200 | 64.2  | Y | 200 | 85.3 | Y | 200 | 103.5 | Y |
| Calcium neodecanoate                                     | 27253-33-4  | e1k | 200 | -2.9  | N | 200 | 2.3  | N | 200 | 0.3   | N |
| Disodium 4,4'-bis(2-sulfostyryl)biphenyl                 | 27344-41-8  | e1k | 200 | 56.0  | Y | 200 | 45.3 | Y | 200 | 50.8  | Y |
| Isobornyl propanoate                                     | 2756-56-1   | e1k | 200 | -3.9  | N | 190 | -6.4 | N | 190 | -1.8  | N |
| Triethoxypentylsilane                                    | 2761-24-2   | e1k | 200 | 0.6   | N | 200 | 2.6  | N | 200 | 0.7   | N |
| Troclosene                                               | 2782-57-2   | e1k | 200 | 5.3   | N | 200 | 1.2  | N | 200 | 11.3  | N |
| 2-Propoxyethanol                                         | 2807-30-9   | e1k | 200 | -2.4  | N | 200 | -4.1 | N | 200 | 0.1   | N |
| Cybutryne                                                | 28159-98-0  | e1k | 200 | 1.3   | N | 200 | 12.5 | N | 200 | 40.0  | N |
| Spiromesifen                                             | 283594-90-1 | e1k | 200 | -2.4  | N | 200 | -2.6 | N | 200 | -3.4  | N |
| C.I. Direct Yellow 12                                    | 2870-32-8   | e1k | 200 | 94.9  | Y | 200 | 96.5 | Y | 200 | 87.1  | Y |
| Imidazole                                                | 288-32-4    | e1k | 200 | -5.2  | N | 200 | -0.2 | N | 200 | 3.5   | N |
| Dimethylnaphthalene                                      | 28804-88-8  | e1k | 200 | 1.2   | N | 200 | 13.3 | N | 200 | 8.7   | N |

|                                         |            |     |     |      |   |     |      |   |     |       |   |
|-----------------------------------------|------------|-----|-----|------|---|-----|------|---|-----|-------|---|
| Sodium dichloroisocyanurate             | 2893-78-9  | e1k | 200 | -3.2 | N | 200 | 3.9  | N | 200 | 4.9   | N |
| Atenolol                                | 29122-68-7 | e1k | 200 | -0.7 | N | 200 | -0.4 | N | 200 | 1.1   | N |
| Dibutyl nonanedioate                    | 2917-73-9  | e1k | 200 | -1.9 | N | 200 | 6.1  | N | 200 | 1.6   | N |
| Melengestrol acetate                    | 2919-66-6  | e1k | 130 | -1.6 | N | 120 | 19.6 | N | 120 | 20.7  | N |
| 2,4-Diisopropylphenol                   | 2934-05-6  | e1k | 200 | -1.0 | N | 200 | 5.5  | N | 200 | -7.3  | N |
| Tolyltriazole                           | 29385-43-1 | e1k | 200 | -7.9 | N | 200 | 9.9  | N | 200 | 9.2   | N |
| Propylene glycol monobutyl ether        | 29387-86-8 | e1k | 200 | 2.2  | N | 200 | 2.2  | N | 200 | -1.1  | N |
| Bis(2-ethylhexyl) phosphate             | 298-07-7   | e1k | 200 | -3.2 | N | 200 | 39.3 | N | 200 | -6.5  | N |
| Octyl beta-D-glucopyranoside            | 29836-26-8 | e1k | 200 | -3.8 | N | 200 | 4.0  | N | 200 | -0.5  | N |
| Trimethoxyphenylsilane                  | 2996-92-1  | e1k | 200 | -1.8 | N | 200 | -5.5 | N | 200 | 3.8   | N |
| Ethyl (2E,4Z)-deca-2,4-dienoate         | 3025-30-7  | e1k | 210 | 22.7 | N | 200 | 76.0 | Y | 200 | 63.5  | Y |
| Isooctadecanoic acid                    | 30399-84-9 | e1k | 200 | 77.8 | Y | 200 | 91.2 | Y | 200 | 98.6  | Y |
| Paraoxon                                | 311-45-5   | e1k | 200 | -4.1 | N | 200 | -1.5 | N | 200 | 4.3   | N |
| 1,4-Dihydroxy-2-naphthoic acid          | 31519-22-9 | e1k | 200 | 57.9 | Y | 200 | 51.4 | Y | 200 | 70.2  | Y |
| Potassium 2-ethylhexanoate              | 3164-85-0  | e1k | 200 | -1.1 | N | 200 | -1.0 | N | 200 | 3.8   | N |
| 1,2,5,6,9,10-Hexabromocyclododecane     | 3194-55-6  | e1k | 170 | 4.3  | Y | 170 | 14.3 | N | 170 | 18.4  | N |
| 1-Cedr-8-en-9-ylethanone                | 32388-55-9 | e1k | 200 | -2.8 | N | 200 | 9.2  | N | 200 | 2.8   | N |
| 3-(Methylthio)propanal                  | 3268-49-3  | e1k | 200 | -3.6 | N | 190 | 1.9  | N | 190 | 28.0  | N |
| 1,2-Dichloro-4-(trifluoromethyl)benzene | 328-84-7   | e1k | 200 | -3.2 | N | 200 | -4.4 | N | 200 | -4.7  | N |
| 4-Hexylaniline                          | 33228-45-4 | e1k | 200 | 2.2  | N | 200 | 9.6  | N | 200 | -3.7  | N |
| Temephos                                | 3383-96-8  | e1k | 200 | 95.8 | Y | 200 | 41.4 | N | 200 | 49.5  | N |
| 1-Octen-3-ol                            | 3391-86-4  | e1k | 200 | 0.1  | N | 200 | -0.9 | N | 200 | 6.7   | N |
| Codlure                                 | 33956-49-9 | e1k | 200 | 21.5 | N | 200 | 61.9 | Y | 200 | 67.2  | Y |
| Butyl (2S)-2-hydroxypropanoate          | 34451-19-9 | e1k | 200 | -3.6 | N | 200 | -2.4 | N | 200 | 4.1   | N |
| 3,5,5-Trimethyl-1-hexanol               | 3452-97-9  | e1k | 200 | -3.5 | N | 200 | -1.1 | N | 200 | 1.2   | N |
| Diflubenzuron                           | 35367-38-5 | e1k | 200 | -2.3 | N | 200 | 1.7  | N | 200 | 3.4   | N |
| Sulprofos                               | 35400-43-2 | e1k | 200 | 14.6 | N | 200 | 8.0  | N | 200 | 6.7   | N |
| 2-Hydroxyethyl octyl sulfide            | 3547-33-9  | e1k | 200 | 3.3  | N | 200 | 1.6  | N | 200 | -14.6 | N |
| 1,2-Dibromo-2,4-dicyanobutane           | 35691-65-7 | e1k | 200 | 2.9  | N | 200 | 14.7 | N | 200 | 36.2  | N |
| N-Butylbenzenesulfonamide               | 3622-84-2  | e1k | 200 | 0.9  | N | 200 | -7.2 | N | 200 | 1.0   | N |
| MCPA-sodium                             | 3653-48-3  | e1k | 200 | -1.2 | N | 200 | -0.4 | N | 200 | -3.0  | N |
| Triisodecyl trimellitate                | 36631-30-8 | e1k | 163 | 3.4  | N | 160 | 14.0 | N | 160 | 8.6   | N |
| (3Z)-3-Hexenyl acetate                  | 3681-71-8  | e1k | 200 | 0.8  | N | 200 | -7.3 | N | 200 | -8.1  | N |
| Chlorophacinone                         | 3691-35-8  | e1k | 200 | 64.9 | Y | 200 | 61.4 | Y | 200 | 64.1  | Y |
| Denatonium benzoate                     | 3734-33-6  | e1k | 200 | -3.2 | N | 200 | -3.9 | N | 200 | -0.4  | N |
| C.I. Acid Red 1                         | 3734-67-6  | e1k | 200 | 3.5  | N | 200 | 7.1  | N | 200 | 21.8  | N |
| Dichlormid                              | 37764-25-3 | e1k | 200 | -0.4 | N | 200 | 0.6  | N | 200 | -0.5  | N |



|                                                                                |            |     |     |      |   |     |       |   |     |       |   |
|--------------------------------------------------------------------------------|------------|-----|-----|------|---|-----|-------|---|-----|-------|---|
| Potassium chlorate                                                             | 3811-04-9  | e1k | 200 | 4.5  | N | 190 | -3.6  | N | 190 | 2.0   | N |
| 2-Butyloctan-1-ol                                                              | 3913-02-8  | e1k | 200 | -0.9 | N | 200 | 8.4   | N | 200 | 10.8  | N |
| Imidazolidinyl urea                                                            | 39236-46-9 | e1k | 200 | 0.4  | N | 200 | -1.1  | N | 200 | 27.0  | N |
| Sodium chloroacetate                                                           | 3926-62-3  | e1k | 200 | 9.9  | N | 200 | 0.6   | N | 200 | -1.7  | N |
| Dinocap                                                                        | 39300-45-3 | e1k | 200 | 98.1 | Y | 200 | 50.9  | Y | 200 | 67.0  | Y |
| 4-Hexyloxyaniline                                                              | 39905-57-2 | e1k | 200 | 4.5  | N | 200 | 2.7   | N | 200 | -5.5  | N |
| 4-Propylcyclohexanone                                                          | 40649-36-3 | e1k | 200 | 0.7  | N | 200 | -1.4  | N | 200 | -2.3  | N |
| Sulisobenzone                                                                  | 4065-45-6  | e1k | 200 | 3.6  | N | 200 | -1.3  | N | 200 | 0.3   | N |
| N,N-Diisopropylaniline                                                         | 4107-98-6  | e1k | 200 | -8.3 | N | 200 | 1.4   | N | 200 | 7.2   | N |
| 2,6-Di-tert-butyl-4-ethylphenol                                                | 4130-42-1  | e1k | 200 | -3.7 | N | 200 | 5.7   | N | 200 | 5.5   | N |
| Apomorphine hydrochloride hydrate                                              | 41372-20-7 | e1k | 80  | 10.3 | N | 70  | 13.4  | N | 70  | 36.9  | N |
| Tributyltin benzoate                                                           | 4342-36-3  | e1k | 200 | -3.8 | N | 200 | 20.2  | N | 200 | 9.8   | N |
| 4-Butyloxyaniline                                                              | 4344-55-2  | e1k | 200 | -5.8 | N | 200 | -0.4  | N | 200 | 5.4   | N |
| Butylene carbonate                                                             | 4437-85-8  | e1k | 200 | -2.7 | N | 190 | -8.3  | N | 190 | 6.6   | N |
| 3-Phenylhexane                                                                 | 4468-42-2  | e1k | 200 | 0.8  | N | 200 | -9.3  | N | 200 | -0.5  | N |
| 1,2-Diphenylethanone                                                           | 451-40-1   | e1k | 200 | 0.3  | N | 200 | 5.5   | N | 200 | 3.3   | N |
| FD&C Red 4                                                                     | 4548-53-2  | e1k | 100 | 5.0  | N | 100 | 10.6  | N | 100 | 0.8   | N |
| 2-Methylpentanedinitrile                                                       | 4553-62-2  | e1k | 200 | -1.5 | N | 200 | 13.1  | N | 200 | 6.5   | N |
| Myristyltrimethylammonium chlorideN,N,N-Trimethyltetradecan-1-aminium chloride | 4574-04-3  | e1k | 180 | 91.9 | Y | 170 | 100.8 | Y | 170 | 95.9  | Y |
| 1-Bromo-4-fluorobenzene                                                        | 460-00-4   | e1k | 200 | 1.8  | N | 200 | -3.5  | N | 200 | -8.3  | N |
| Farnesol                                                                       | 4602-84-0  | e1k | 200 | 16.3 | N | 200 | 76.7  | Y | 200 | 86.2  | Y |
| Cyanoguanidine                                                                 | 461-58-5   | e1k | 200 | -0.8 | N | 190 | 5.5   | N | 190 | 11.5  | N |
| Linolenic acid                                                                 | 463-40-1   | e1k | 200 | 92.2 | Y | 200 | 87.7  | Y | 200 | 90.4  | Y |
| 5-Chlorosalicylanilide                                                         | 4638-48-6  | e1k | 200 | 2.6  | N | 200 | -7.1  | N | 200 | -5.5  | N |
| D-Camphor                                                                      | 464-49-3   | e1k | 200 | -3.8 | N | 200 | 4.1   | N | 200 | 3.5   | N |
| 1,8-Cineol                                                                     | 470-82-6   | e1k | 200 | -1.7 | N | 200 | 0.9   | N | 200 | 2.3   | N |
| Methyl 2,4-dihydroxy-3,6-dimethylbenzoate                                      | 4707-47-5  | e1k | 200 | 0.2  | N | 200 | 8.8   | N | 200 | -13.7 | N |
| Diphenyl phosphite                                                             | 4712-55-4  | e1k | 200 | -3.9 | N | 200 | 12.0  | N | 200 | 1.5   | N |
| Equilin                                                                        | 474-86-2   | e1k | 200 | 1.8  | N | 200 | 11.6  | N | 200 | -1.4  | N |
| Chrysin                                                                        | 480-40-0   | e1k | 200 | 0.9  | N | 200 | 3.0   | N | 200 | -4.3  | N |
| 2,4,6-Trimethylbenzoic acid                                                    | 480-63-7   | e1k | 200 | -1.1 | N | 200 | 4.4   | N | 200 | 5.1   | N |
| 5,7-Dimethoxy-2H-chromen-2-one                                                 | 487-06-9   | e1k | 200 | -5.8 | N | 200 | 8.2   | N | 200 | 0.9   | N |
| 2,6-Di-tert-butyl-4-methoxyphenol                                              | 489-01-0   | e1k | 200 | 3.8  | N | 190 | -1.3  | N | 190 | -2.5  | N |
| Biochanin A                                                                    | 491-80-5   | e1k | 200 | 35.3 | N | 200 | 13.2  | N | 200 | -6.8  | N |
| Methyl red                                                                     | 493-52-7   | e1k | 200 | -2.0 | N | 200 | 4.0   | N | 200 | 8.4   | N |
| 2-Ethyl-3-hydroxy-4H-pyran-4-one                                               | 4940-11-8  | e1k | 200 | -3.8 | N | 200 | 1.5   | N | 200 | 2.5   | N |

|                                            |            |     |     |      |   |     |      |   |     |       |   |
|--------------------------------------------|------------|-----|-----|------|---|-----|------|---|-----|-------|---|
| Glycoluril                                 | 496-46-8   | e1k | 200 | -2.1 | N | 200 | -3.0 | N | 200 | 0.5   | N |
| Isopropyl-o-cresol                         | 499-75-2   | e1k | 200 | -2.1 | N | 200 | -3.2 | N | 200 | 0.3   | N |
| 2,6-Pyridinedicarboxylic acid              | 499-83-2   | e1k | 200 | -1.2 | N | 200 | 0.4  | N | 200 | 4.2   | N |
| Ergocalciferol                             | 50-14-6    | e1k | 200 | 58.9 | Y | 200 | 77.4 | Y | 200 | 93.7  | Y |
| Lactic acid                                | 50-21-5    | e1k | 200 | -2.0 | N | 190 | -0.7 | N | 190 | -2.6  | N |
| Estriol                                    | 50-27-1    | e1k | 200 | -8.2 | N | 200 | 7.5  | N | 200 | 3.5   | N |
| D-Glucitol                                 | 50-70-4    | e1k | 190 | -1.3 | N | 190 | -2.0 | N | 190 | 4.5   | N |
| L-Ascorbic acid                            | 50-81-7    | e1k | 200 | 4.3  | N | 200 | 7.4  | N | 200 | -7.5  | N |
| Nordihydroguaiaretic acid                  | 500-38-9   | e1k | 200 | 75.4 | Y | 200 | 77.0 | Y | 200 | 94.5  | Y |
| Procaine hydrochloride                     | 51-05-8    | e1k | 200 | -0.3 | N | 200 | 16.9 | N | 200 | 6.8   | N |
| Monotridecyl phosphate                     | 5116-94-9  | e1k | 200 | 94.8 | Y | 200 | 81.6 | Y | 200 | 101.1 | Y |
| Sodium methyl sulfate                      | 512-42-5   | e1k | 200 | -2.0 | N | 200 | -2.6 | N | 200 | 3.6   | N |
| Trimethyl phosphate                        | 512-56-1   | e1k | 200 | -2.7 | N | 200 | 0.9  | N | 200 | 3.9   | N |
| Chloroallyl methenamine chloride           | 51229-78-8 | e1k | 200 | -4.4 | N | 200 | 9.6  | Y | 200 | 51.6  | Y |
| Methyltrioctylammonium chloride            | 5137-55-3  | e1k | 200 | 83.7 | Y | 200 | 95.9 | Y | 200 | 90.7  | Y |
| Sulfosuccinic acid                         | 5138-18-1  | e1k | 200 | 2.6  | N | 200 | 5.5  | N | 200 | 5.0   | N |
| 3,7-Dimethyl-2,6-octadienenitrile          | 5146-66-7  | e1k | 210 | 0.1  | N | 200 | -9.7 | N | 200 | 6.8   | N |
| 2-Ethylhexylparaben                        | 5153-25-3  | e1k | 200 | 97.8 | Y | 200 | 96.2 | Y | 200 | 96.5  | Y |
| Sodium dichloro-s-triazinetriene dihydrate | 51580-86-0 | e1k | 200 | -0.4 | N | 200 | 1.7  | N | 200 | 3.3   | N |
| Fenvalerate                                | 51630-58-1 | e1k | 200 | 4.0  | N | 200 | 7.1  | N | 200 | 7.6   | N |
| 1-(Bromomethyl)-3-phenoxybenzene           | 51632-16-7 | e1k | 200 | 0.1  | N | 200 | 3.9  | N | 200 | 6.0   | N |
| Kaempferol                                 | 520-18-3   | e1k | 200 | 22.8 | N | 190 | 6.1  | N | 190 | 0.2   | N |
| Apigenin                                   | 520-36-5   | e1k | 200 | 0.3  | N | 200 | -0.5 | N | 200 | -10.5 | N |
| Dehydroacetic acid                         | 520-45-6   | e1k | 200 | 1.2  | N | 200 | -2.2 | N | 200 | 11.8  | N |
| dl-alpha-Tocopheryl acetate                | 52225-20-4 | e1k | 200 | -1.0 | N | 200 | -0.7 | N | 200 | 21.0  | N |
| Kinetin                                    | 525-79-1   | e1k | 200 | -1.7 | N | 200 | -4.1 | N | 200 | 2.5   | N |
| Flavone                                    | 525-82-6   | e1k | 200 | -2.4 | N | 190 | -1.2 | N | 190 | -18.1 | N |
| 2,3-Dimethylphenol                         | 526-75-0   | e1k | 200 | 0.0  | N | 200 | 7.6  | N | 200 | 6.9   | N |
| Deltamethrin                               | 52918-63-5 | e1k | 200 | -6.5 | N | 200 | 5.7  | N | 200 | 15.4  | N |
| o,p'-DDD                                   | 53-19-0    | e1k | 200 | -6.0 | N | 200 | 13.3 | N | 200 | 17.0  | N |
| Dehydroepiandrosterone                     | 53-43-0    | e1k | 200 | 2.5  | N | 200 | 6.0  | N | 200 | -22.2 | N |
| Dibenz(a,h)anthracene                      | 53-70-3    | e1k | 180 | 14.1 | N | 170 | 27.0 | N | 170 | 41.6  | N |
| Sodium 2-naphthalenesulfonate              | 532-02-5   | e1k | 200 | -6.3 | N | 200 | -3.6 | N | 200 | -2.1  | N |
| Dihydromyrcenol                            | 53219-21-9 | e1k | 200 | 7.1  | N | 200 | 4.2  | N | 200 | 2.1   | N |
| Sulfamic acid                              | 5329-14-6  | e1k | 200 | -0.3 | N | 200 | -3.3 | N | 200 | -0.4  | N |
| 2,4-D-ethyl ester                          | 533-23-3   | e1k | 200 | 2.8  | N | 200 | 0.1  | N | 200 | -0.2  | N |
| 2-Octyl-1-dodecanol                        | 5333-42-6  | e1k | 200 | -2.0 | N | 200 | -9.6 | N | 200 | 0.6   | N |

|                                              |            |     |     |       |   |     |       |   |     |       |   |
|----------------------------------------------|------------|-----|-----|-------|---|-----|-------|---|-----|-------|---|
| N,N'-Dimethylthiourea                        | 534-13-4   | e1k | 200 | 0.1   | N | 200 | 2.6   | N | 200 | 2.8   | N |
| (Z)-11-Hexadecenal                           | 53939-28-9 | e1k | 200 | 1.7   | N | 200 | 33.1  | N | 200 | 25.8  | N |
| 5-Ethyl-5-methylhydantoin                    | 5394-36-5  | e1k | 200 | -4.9  | N | 200 | 6.2   | N | 200 | 2.9   | N |
| Pentyl butyrate                              | 540-18-1   | e1k | 200 | -1.9  | N | 200 | 3.0   | N | 200 | 10.6  | N |
| tert-Butyl acetate                           | 540-88-5   | e1k | 200 | 0.1   | N | 200 | 0.4   | N | 200 | -4.3  | N |
| Cyclobutyl phenyl ketone                     | 5407-98-7  | e1k | 200 | -2.3  | N | 200 | -0.4  | N | 200 | -2.0  | N |
| Decamethylcyclpentasiloxane                  | 541-02-6   | e1k | 200 | -3.1  | N | 200 | -5.7  | N | 200 | 1.4   | N |
| 1,3-Cyclopentadiene                          | 542-92-7   | e1k | 200 | 4.9   | N | 200 | -4.1  | N | 200 | 0.1   | N |
| Benzyl bromoacetate                          | 5437-45-6  | e1k | 200 | -3.4  | N | 200 | -2.8  | N | 200 | 3.4   | N |
| Tetradecanoic acid                           | 544-63-8   | e1k | 200 | 63.0  | Y | 200 | 81.3  | Y | 200 | 76.6  | Y |
| N-Methylphthalimide                          | 550-44-7   | e1k | 200 | 2.4   | N | 200 | -0.3  | N | 200 | -3.9  | N |
| Trimellitic anhydride                        | 552-30-7   | e1k | 200 | 6.3   | N | 200 | 5.4   | N | 200 | 0.3   | N |
| Magnesium dibenzoate                         | 553-70-8   | e1k | 200 | 2.8   | N | 200 | 4.4   | N | 200 | 2.8   | N |
| Sodium methacrylate                          | 5536-61-8  | e1k | 200 | 0.3   | N | 200 | 7.9   | N | 200 | 6.8   | N |
| Pyridate                                     | 55512-33-9 | e1k | 200 | 1.3   | N | 200 | 6.3   | N | 200 | 5.0   | N |
| Acesulfame potassium                         | 55589-62-3 | e1k | 200 | -2.8  | N | 200 | -0.5  | N | 200 | -4.0  | N |
| Mepronil                                     | 55814-41-0 | e1k | 200 | 3.6   | N | 200 | -3.1  | N | 200 | -1.6  | N |
| Tripropylene glycol butyl ether              | 55934-93-5 | e1k | 200 | -1.6  | N | 200 | 0.5   | N | 200 | 2.8   | N |
| Chlorhexidine diacetate                      | 56-95-1    | e1k | 200 | 89.8  | Y | 200 | 103.0 | Y | 200 | 105.1 | Y |
| N,N-Dibutyl-N-methylbutan-1-aminium chloride | 56375-79-2 | e1k | 200 | 1.2   | N | 200 | -0.6  | N | 200 | 2.3   | N |
| Allyl isothiocyanate                         | 57-06-7    | e1k | 210 | 4.3   | N | 200 | -4.5  | N | 200 | 6.0   | N |
| Hexadecyltrimethylammonium bromide           | 57-09-0    | e1k | 200 | 98.3  | Y | 200 | 97.3  | Y | 200 | 104.8 | Y |
| Hexadecanoic acid                            | 57-10-3    | e1k | 200 | -11.7 | N | 200 | 21.2  | N | 200 | 34.9  | N |
| 1,1-Dimethylhydrazine                        | 57-14-7    | e1k | 200 | -4.3  | N | 200 | 1.9   | N | 200 | 12.7  | N |
| 1,4-Dimethylnaphthalene                      | 571-58-4   | e1k | 200 | -1.0  | N | 200 | -2.7  | N | 200 | 1.9   | N |
| Pyridoxine hydrochloride                     | 58-56-0    | e1k | 200 | 3.6   | N | 200 | -0.5  | N | 200 | 3.9   | N |
| Triphenylethylene                            | 58-72-0    | e1k | 200 | -3.2  | N | 200 | 0.8   | N | 200 | 16.2  | N |
| Biotin                                       | 58-85-5    | e1k | 200 | -0.6  | N | 200 | -5.2  | N | 200 | 4.2   | N |
| D-Xylose                                     | 58-86-6    | e1k | 200 | -0.9  | N | 200 | -3.9  | N | 200 | 6.1   | N |
| 2,5-Dichlorophenol                           | 583-78-8   | e1k | 200 | 5.9   | N | 200 | 1.9   | N | 200 | 2.7   | N |
| 3,5,5-Trimethylhexyl acetate                 | 58430-94-7 | e1k | 200 | -2.6  | N | 200 | 5.5   | N | 200 | -4.1  | N |
| 3-tert-Butylphenol                           | 585-34-2   | e1k | 200 | -1.0  | N | 200 | 8.8   | N | 200 | -1.5  | N |
| C.I. Acid Orange 8, monosodium salt          | 5850-86-2  | e1k | 200 | 1.9   | N | 200 | 24.3  | Y | 200 | 12.6  | Y |
| Terpinolene                                  | 586-62-9   | e1k | 200 | 2.6   | N | 200 | 10.9  | N | 200 | 21.1  | N |
| 2-Chloro-N-phenylacetamide                   | 587-65-5   | e1k | 200 | 103.2 | Y | 200 | 37.9  | N | 200 | 11.0  | N |
| Diphenylmercury(II)                          | 587-85-9   | e1k | 200 | -5.5  | N | 200 | -1.7  | N | 200 | -1.2  | N |
| Heptyl butanoate                             | 5870-93-9  | e1k | 200 | 2.8   | N | 200 | -1.3  | N | 200 | -1.5  | N |

|                                               |            |     |              |      |   |              |       |   |              |       |   |
|-----------------------------------------------|------------|-----|--------------|------|---|--------------|-------|---|--------------|-------|---|
| Decyl beta-D-glucopyranoside                  | 58846-77-8 | e1k | 200          | 2.7  | N | 200          | -3.8  | N | 200          | -4.5  | N |
| Tetradecanoic acid, 2,3-dihydroxypropyl ester | 589-68-4   | e1k | 200          | -0.2 | N | 200          | 25.8  | Y | 200          | 54.4  | Y |
| Sulfaquinoxaline                              | 59-40-5    | e1k | 200          | 3.6  | N | 200          | 4.0   | N | 200          | 8.3   | N |
| Laurocapram                                   | 59227-89-3 | e1k | 200          | 0.1  | N | 200          | 74.0  | Y | 200          | 65.8  | Y |
| 2,2-Dichloropropane                           | 594-20-7   | e1k | 200          | 1.3  | N | 200          | -0.6  | N | 200          | 7.3   | N |
| Methyl carbamate                              | 598-55-0   | e1k | 200          | -6.8 | N | 200          | 10.8  | N | 200          | -10.1 | N |
| 2-Phenylethanol                               | 60-12-8    | e1k | 200          | -6.5 | N | 200          | -7.8  | N | 200          | -0.4  | N |
| Linoleic acid                                 | 60-33-3    | e1k | 200          | 87.7 | Y | 200          | 89.1  | Y | 200          | 96.5  | Y |
| Triphenylphosphine                            | 603-35-0   | e1k | 200          | 3.1  | N | 200          | -5.2  | N | 200          | 1.2   | N |
| Oxazepam                                      | 604-75-1   | e1k | 170          | -1.3 | N | 170          | 5.7   | N | 170          | 15.1  | N |
| Diisopropyl phthalate                         | 605-45-8   | e1k | 200          | -0.1 | N | 200          | 4.4   | N | 200          | -2.1  | N |
| 6-Hydroxy-2-naphthyl disulfide                | 6088-51-3  | e1k | 200          | 98.2 | Y | 200          | 87.5  | Y | 200          | 94.6  | Y |
| 2,5-Dimethylbenzenesulfonic acid              | 609-54-1   | e1k | 200          | 0.4  | N | 200          | 1.2   | N | 200          | -6.0  | N |
| Methylene blue                                | 61-73-4    | e1k | 200          | 3.8  | N | 200          | 42.1  | N | 200          | 16.5  | N |
| Amitrole                                      | 61-82-5    | e1k | 200          | 4.3  | N | 200          | 1.8   | N | 200          | 1.5   | N |
| 2-Hydroxybenzotrile                           | 611-20-1   | e1k | 200          | -1.7 | N | 190          | -28.0 | N | 190          | -9.0  | N |
| Isopropyl phenyl ketone                       | 611-70-1   | e1k | 200          | 3.2  | N | 200          | -1.9  | N | 200          | -8.7  | N |
| 3,3'-Dimethylbenzidine dihydrochloride        | 612-82-8   | e1k | 200          | 1.6  | N | 200          | 15.5  | N | 200          | -3.6  | N |
| Sodium 4-octylbenzenesulfonate                | 6149-03-7  | e1k | 200          | 1.8  | N | 200          | 39.9  | N | 200          | -4.7  | N |
| Sodium 2-phenylphenate tetrahydrate           | 6152-33-6  | e1k | 200          | 47.7 | N | 200          | 68.2  | Y | 200          | 70.6  | Y |
| 2-Pyrrolidinone                               | 616-45-5   | e1k | 200          | -3.7 | N | 190          | -1.1  | N | 190          | -9.6  | N |
| Cremophor EL                                  | 61791-12-6 | e1k | 100<br>µg/ml | 5.1  | N | 100<br>µg/ml | 9.1   | N | 100<br>µg/ml | 8.4   | N |
| 3-Isopropylphenol                             | 618-45-1   | e1k | 200          | -2.8 | N | 200          | 3.0   | N | 200          | -1.4  | N |
| Deethylatrazine                               | 6190-65-4  | e1k | 200          | -1.8 | N | 200          | -4.3  | N | 200          | 28.5  | N |
| Thiourea                                      | 62-56-6    | e1k | 200          | 5.4  | N | 200          | -6.0  | N | 200          | 9.7   | N |
| Sodium fluoroacetate                          | 62-74-8    | e1k | 200          | 0.8  | N | 200          | -3.9  | N | 200          | -0.1  | N |
| 3-Ethylphenol                                 | 620-17-7   | e1k | 200          | 0.3  | N | 200          | 0.2   | N | 200          | -4.0  | N |
| 4-Methylstyrene                               | 622-97-9   | e1k | 200          | -3.0 | N | 200          | 5.7   | N | 200          | -1.7  | N |
| Isopropyl formate                             | 625-55-8   | e1k | 200          | -0.8 | N | 200          | 2.9   | N | 200          | 1.4   | N |
| Hexyl salicylate                              | 6259-76-3  | e1k | 200          | -4.7 | N | 200          | -13.3 | N | 200          | -1.1  | N |
| 3,5-Dichloroaniline                           | 626-43-7   | e1k | 200          | 3.5  | N | 200          | -3.0  | N | 200          | -5.3  | N |
| Ethyl 4-chlorophenyl ketone                   | 6285-05-8  | e1k | 200          | 1.2  | N | 200          | -2.0  | N | 200          | -2.7  | N |
| Lactose                                       | 63-42-3    | e1k | 200          | 2.7  | N | 200          | -1.3  | N | 200          | 2.1   | N |
| Hydroxyprogesterone caproate                  | 630-56-8   | e1k | 200          | 2.2  | N | 200          | 6.3   | N | 200          | 0.9   | N |
| C.I. Acid Orange 7                            | 633-96-5   | e1k | 100          | 0.5  | N | 100          | 3.9   | N | 100          | 5.9   | N |
| Benzyl-C8-18-alkyldimethylammonium chlorides  | 63449-41-2 | e1k | 200          | 94.9 | Y | 200          | 95.9  | Y | 200          | 101.9 | Y |

|                                                            |             |     |     |       |   |     |      |   |     |      |   |
|------------------------------------------------------------|-------------|-----|-----|-------|---|-----|------|---|-----|------|---|
| Acid Yellow 11                                             | 6359-82-6   | e1k | 200 | 0.8   | N | 200 | 0.7  | N | 200 | 1.5  | N |
| C.I. Acid Yellow 34, monosodium salt                       | 6359-90-6   | e1k | 200 | 0.1   | N | 200 | 32.7 | N | 200 | 0.7  | N |
| C.I. Acid Yellow 17, disodium salt                         | 6359-98-4   | e1k | 200 | -0.3  | N | 200 | 20.2 | N | 200 | 8.8  | N |
| 2-Methylaniline hydrochloride                              | 636-21-5    | e1k | 200 | 0.1   | N | 190 | 0.5  | N | 190 | 8.6  | N |
| 1-Phenylurea                                               | 64-10-8     | e1k | 190 | -3.7  | N | 190 | -0.2 | N | 190 | 4.6  | N |
| 4,5-Dichloro-2-octyl-3(2H)-isothiazolone                   | 64359-81-5  | e1k | 200 | 105.9 | Y | 200 | 96.6 | Y | 200 | 96.4 | Y |
| Phenyl phosphorus dichloride                               | 644-97-3    | e1k | 200 | 3.9   | N | 190 | -4.3 | N | 190 | 2.6  | N |
| 4-Propylphenol                                             | 645-56-7    | e1k | 200 | 1.0   | N | 200 | 2.5  | N | 200 | -8.1 | N |
| 2-Ethyl-2-hexenal                                          | 645-62-5    | e1k | 200 | 1.5   | N | 190 | 3.8  | N | 190 | 11.0 | N |
| Triclopyr-butotyl                                          | 64700-56-7  | e1k | 200 | -1.8  | N | 200 | 4.0  | N | 200 | 1.1  | N |
| R-(-)-Carvone                                              | 6485-40-1   | e1k | 200 | -0.6  | N | 200 | 21.2 | N | 200 | 35.8 | N |
| Salicylamide                                               | 65-45-2     | e1k | 200 | -4.5  | N | 200 | 2.9  | N | 200 | 8.9  | N |
| Morin hydrate                                              | 654055-01-3 | e1k | 200 | 96.1  | Y | 200 | 19.8 | Y | 200 | 91.7 | Y |
| Sodium 4-methylbenzenesulfonate                            | 657-84-1    | e1k | 200 | -1.5  | N | 200 | -3.5 | N | 200 | 2.3  | N |
| 1,10-Phenanthroline                                        | 66-71-7     | e1k | 200 | -2.4  | N | 200 | 4.4  | N | 200 | -4.0 | N |
| N-Methylhydrazinecarbothioamide                            | 6610-29-3   | e1k | 200 | 3.4   | N | 200 | -0.4 | N | 200 | 5.6  | N |
| C.I. Acid Violet 12, disodium salt                         | 6625-46-3   | e1k | 190 | 6.2   | N | 180 | -2.6 | N | 180 | 10.9 | N |
| Ranitidine                                                 | 66357-35-5  | e1k | 200 | -10.4 | N | 200 | 0.7  | N | 200 | 4.7  | N |
| Forskolin                                                  | 66575-29-9  | e1k | 200 | -2.4  | N | 200 | -9.7 | N | 200 | -4.2 | N |
| Irganox 1010                                               | 6683-19-8   | e1k | 90  | -1.5  | N | 80  | -1.5 | N | 80  | 9.2  | N |
| Dimethyl sulfoxide                                         | 67-68-5     | e1k | 200 | -3.4  | N | 200 | -0.6 | N | 200 | 6.7  | N |
| L-Glucitol                                                 | 6706-59-8   | e1k | 200 | 5.4   | N | 200 | -3.3 | N | 200 | -0.3 | N |
| (2E)-2-Hexenal                                             | 6728-26-3   | e1k | 200 | 4.6   | N | 200 | 27.0 | N | 200 | 38.5 | N |
| Hydramethylnon                                             | 67485-29-4  | e1k | 200 | -0.2  | N | 200 | 86.6 | Y | 200 | 9.1  | Y |
| (2R,6S)-Fenpropimorph                                      | 67564-91-4  | e1k | 200 | -4.3  | N | 200 | 3.8  | N | 200 | -2.8 | N |
| Acid Red 337                                               | 67786-14-5  | e1k | 200 | 14.4  | N | 200 | 29.0 | N | 200 | 18.4 | N |
| Hexyl benzoate                                             | 6789-88-4   | e1k | 200 | -0.6  | N | 200 | 7.9  | N | 200 | 7.4  | N |
| Thioglycolic acid                                          | 68-11-1     | e1k | 200 | 14.3  | N | 200 | 13.9 | N | 200 | 16.9 | N |
| (Dicyclopentadienyloxy)ethyl methacrylate                  | 68169-03-9  | e1k | 200 | 28.5  | N | 200 | 82.0 | Y | 200 | 83.3 | Y |
| Tetrapropyl orthosilicate                                  | 682-01-9    | e1k | 200 | 8.1   | N | 200 | -3.7 | N | 200 | 1.5  | N |
| Dibutyltin dichloride                                      | 683-18-1    | e1k | 200 | 7.3   | N | 200 | 17.2 | N | 200 | 9.5  | N |
| N-Nitroso-N-methylurea                                     | 684-93-5    | e1k | 200 | 3.1   | N | 200 | 8.1  | N | 200 | 1.0  | N |
| DINP branched                                              | 68515-48-0  | e1k | 200 | -6.7  | N | 200 | 2.0  | N | 200 | -6.4 | N |
| Hexanedioic acid, di-C7-9-branched and linear alkyl esters | 68515-75-3  | e1k | 200 | -2.2  | N | 200 | 8.2  | N | 200 | -2.5 | N |
| Acid Orange 156                                            | 68555-86-2  | e1k | 200 | 13.2  | N | 200 | 38.8 | Y | 200 | 66.7 | Y |
| C12-14-Alkyl glycidyl ether                                | 68609-97-2  | e1k | 119 | 75.3  | Y | 110 | 58.6 | Y | 110 | 47.2 | Y |

|                                  |            |     |              |      |   |              |      |   |              |       |   |
|----------------------------------|------------|-----|--------------|------|---|--------------|------|---|--------------|-------|---|
| Cornmint oil                     | 68917-18-0 | e1k | 100<br>µg/ml | 5.1  | N | 100<br>µg/ml | 8.5  | N | 100<br>µg/ml | 6.3   | N |
| Salicylic acid                   | 69-72-7    | e1k | 200          | -4.5 | N | 200          | -1.9 | N | 200          | -2.1  | N |
| Ethyl undec-10-enoate            | 692-86-4   | e1k | 200          | 9.2  | N | 200          | 4.7  | N | 200          | 6.5   | N |
| gamma-Caprolactone               | 695-06-7   | e1k | 200          | 2.2  | N | 190          | -1.3 | N | 190          | 2.8   | N |
| Haloxypop-methyl                 | 69806-40-2 | e1k | 200          | -0.3 | N | 200          | 0.9  | N | 200          | 5.7   | N |
| 4-Toluenesulfonamide             | 70-55-3    | e1k | 200          | -4.0 | N | 190          | -1.9 | N | 190          | 6.3   | N |
| Dihydrojasmane lactone           | 7011-83-8  | e1k | 200          | 2.9  | N | 200          | 5.3  | N | 200          | -0.9  | N |
| (2-Nitro-1-propenyl)benzene      | 705-60-2   | e1k | 200          | 8.7  | N | 200          | 73.8 | Y | 200          | 55.2  | Y |
| 4-Butylcyclohexanol              | 70568-60-4 | e1k | 200          | -2.1 | N | 200          | 2.9  | N | 200          | -9.1  | N |
| gamma-Decanolactone              | 706-14-9   | e1k | 200          | 3.2  | N | 200          | 8.3  | N | 200          | -8.7  | N |
| Chloramine-T trihydrate          | 7080-50-4  | e1k | 200          | 10.3 | N | 200          | 6.9  | N | 200          | 15.8  | N |
| 1-Propanol                       | 71-23-8    | e1k | 200          | 1.3  | N | 200          | -4.2 | N | 200          | 1.0   | N |
| Fenoxaprop-P-ethyl               | 71283-80-2 | e1k | 200          | 11.2 | N | 200          | 25.3 | Y | 200          | 71.5  | Y |
| MON-4660                         | 71526-07-3 | e1k | 200          | 9.0  | N | 200          | 4.9  | N | 200          | 11.0  | N |
| 1,3,5-Triisopropylbenzene        | 717-74-8   | e1k | 200          | 3.1  | N | 200          | -0.2 | N | 200          | -1.8  | N |
| Mestranol                        | 72-33-3    | e1k | 200          | 2.1  | N | 200          | 8.0  | N | 200          | -4.8  | N |
| Nerolidol                        | 7212-44-4  | e1k | 200          | 7.4  | N | 200          | 18.4 | N | 200          | 18.5  | N |
| Melatonin                        | 73-31-4    | e1k | 200          | -2.1 | N | 200          | 0.5  | N | 200          | 8.2   | N |
| Dimethyldiallylammonium chloride | 7398-69-8  | e1k | 200          | -0.8 | N | 200          | -0.5 | N | 200          | 2.8   | N |
| Trimethylamine                   | 75-50-3    | e1k | 200          | -5.7 | N | 200          | -1.9 | N | 200          | 4.5   | N |
| tert-Butylamine                  | 75-64-9    | e1k | 200          | -1.9 | N | 200          | -1.5 | N | 200          | -5.4  | N |
| 2-Hydroxy-2-methylpropanenitrile | 75-86-5    | e1k | 200          | 0.4  | N | 200          | 6.8  | N | 200          | 6.3   | N |
| Dimethyltin dichloride           | 753-73-1   | e1k | 200          | -0.1 | N | 200          | 2.6  | N | 200          | -5.7  | N |
| (S)-(-)-beta-Citronellol         | 7540-51-4  | e1k | 200          | -7.4 | N | 200          | 5.9  | N | 200          | -2.2  | N |
| Dimethyl methylphosphonate       | 756-79-6   | e1k | 200          | -3.7 | N | 200          | 7.5  | N | 200          | 3.3   | N |
| Bornyl acetate                   | 76-49-3    | e1k | 200          | 2.1  | N | 200          | 12.5 | N | 200          | 8.0   | N |
| 3,4-Dichloro-1-butene            | 760-23-6   | e1k | 200          | 7.4  | N | 200          | 14.0 | N | 200          | 37.2  | N |
| Diethyl phosphite                | 762-04-9   | e1k | 200          | -0.6 | N | 200          | 0.9  | N | 200          | 1.8   | N |
| 2-Ethylhexyl sulfanylacetate     | 7659-86-1  | e1k | 200          | 4.0  | N | 200          | 5.3  | N | 200          | -12.0 | N |
| Phosphoric acid                  | 7664-38-2  | e1k | 200          | 5.4  | N | 200          | -1.0 | N | 200          | 1.5   | N |
| Ronidazole                       | 7681-76-7  | e1k | 200          | -2.4 | N | 200          | 8.0  | N | 200          | 2.8   | N |
| 4-tert-Butylaniline              | 769-92-6   | e1k | 200          | 2.3  | N | 200          | 1.9  | N | 200          | -2.1  | N |
| Gibberellic acid                 | 77-06-5    | e1k | 200          | 0.7  | N | 200          | 2.3  | N | 200          | 3.6   | N |
| Dicyclopentadiene                | 77-73-6    | e1k | 200          | 3.9  | N | 190          | 1.6  | N | 190          | 7.9   | N |
| Ethyl methylphenylglycidate      | 77-83-8    | e1k | 200          | -4.5 | N | 200          | 6.8  | N | 200          | 10.0  | N |
| Tromethamine                     | 77-86-1    | e1k | 200          | 2.1  | N | 190          | -1.2 | N | 190          | 6.5   | N |

|                                         |            |     |              |       |   |              |      |   |              |       |   |
|-----------------------------------------|------------|-----|--------------|-------|---|--------------|------|---|--------------|-------|---|
| 1-Phenoxy-2-propanol                    | 770-35-4   | e1k | 200          | 2.8   | N | 200          | -4.6 | N | 200          | 0.0   | N |
| Potassium nitrate                       | 7757-79-1  | e1k | 200          | -5.8  | N | 190          | -1.9 | N | 190          | 3.6   | N |
| Ammonium sulfamate                      | 7773-06-0  | e1k | 200          | 0.4   | N | 190          | 0.8  | N | 190          | -2.6  | N |
| Sodium persulfate                       | 7775-27-1  | e1k | 200          | -3.1  | N | 200          | 0.6  | N | 200          | 3.9   | N |
| 1,3,5-Triethylhexahydro-s-triazine      | 7779-27-3  | e1k | 200          | 3.3   | N | 200          | -3.3 | N | 200          | 4.7   | N |
| (-)-alpha-Pinene                        | 7785-26-4  | e1k | 200          | -0.2  | N | 200          | 5.6  | N | 200          | -2.8  | N |
| Ethyltriethoxysilane                    | 78-07-9    | e1k | 200          | -1.7  | N | 200          | 18.0 | N | 200          | -0.9  | N |
| Pentaerythritol tetranitrate            | 78-11-5    | e1k | 200          | -8.3  | N | 200          | 0.4  | N | 200          | 2.3   | N |
| Triethyl phosphate                      | 78-40-0    | e1k | 200          | -2.3  | N | 200          | -1.1 | N | 200          | 1.9   | N |
| Tris(2-butoxyethyl) phosphate           | 78-51-3    | e1k | 200          | 4.4   | N | 200          | 5.2  | N | 200          | -9.8  | N |
| 3,7-Dimethyl-3-octanol                  | 78-69-3    | e1k | 200          | -0.9  | N | 200          | 3.6  | N | 200          | 1.5   | N |
| Linalool                                | 78-70-6    | e1k | 200          | 2.7   | N | 200          | 4.4  | N | 200          | 4.8   | N |
| 2-Methylpropanenitrile                  | 78-82-0    | e1k | 200          | 0.7   | N | 200          | -2.5 | N | 200          | -4.1  | N |
| 1-Amino-2-propanol                      | 78-96-6    | e1k | 200          | -9.2  | N | 200          | -1.5 | N | 200          | -0.3  | N |
| Enterolactone                           | 78473-71-9 | e1k | 70           | 10.5  | N | 60           | -2.4 | N | 60           | -11.3 | N |
| Diazolidinyl urea                       | 78491-02-8 | e1k | 200          | -5.6  | N | 200          | 10.5 | N | 200          | 15.2  | N |
| Glycolic acid                           | 79-14-1    | e1k | 200          | 5.9   | N | 190          | 4.1  | N | 190          | 5.9   | N |
| Nitroethane                             | 79-24-3    | e1k | 200          | -0.7  | N | 200          | -0.1 | N | 200          | -8.3  | N |
| Oxytetracycline                         | 79-57-2    | e1k | 200          | 80.8  | Y | 200          | 45.5 | Y | 200          | 83.7  | Y |
| Camphene                                | 79-92-5    | e1k | 200          | -2.0  | N | 200          | 5.4  | N | 200          | -2.5  | N |
| 2,2',6,6'-Tetrachlorobisphenol A        | 79-95-8    | e1k | 200          | 103.6 | Y | 200          | 90.3 | Y | 200          | 74.5  | Y |
| 4-Chloropentylbenzene                   | 79098-20-7 | e1k | 200          | -0.3  | N | 200          | 2.1  | N | 200          | -2.2  | N |
| Thifensulfuron-methyl                   | 79277-27-3 | e1k | 200          | -1.8  | N | 200          | -5.0 | N | 200          | -0.3  | N |
| 4,4'-Dichlorodiphenyl sulfone           | 80-07-9    | e1k | 200          | -0.3  | N | 200          | -1.9 | N | 200          | 11.5  | N |
| 4,4'-Sulfonyldiphenol                   | 80-09-1    | e1k | 200          | 2.6   | N | 200          | -4.6 | N | 200          | 2.0   | N |
| alpha-Terpinyol acetate                 | 80-26-2    | e1k | 200          | 9.3   | N | 200          | 0.3  | N | 200          | 11.2  | N |
| Terpinyol propionate                    | 80-27-3    | e1k | 200          | 13.9  | N | 200          | 2.0  | N | 200          | 3.6   | N |
| 3-(4-tert-Butylphenyl)-2-methylpropanal | 80-54-6    | e1k | 200          | 12.2  | N | 200          | 17.7 | N | 200          | 10.8  | N |
| alpha-Pinene                            | 80-56-8    | e1k | 200          | 2.8   | N | 200          | -2.6 | N | 200          | -3.0  | N |
| Terpineol                               | 8000-41-7  | e1k | 200          | 0.4   | N | 200          | -6.4 | N | 200          | -0.4  | N |
| Benzalkonium chloride                   | 8001-54-5  | e1k | 200          | 104.2 | Y | 200          | 98.5 | Y | 200          | 102.1 | Y |
| Peppermint oil                          | 8006-90-4  | e1k | 100<br>µg/ml | 19.8  | N | 100<br>µg/ml | 21.9 | N | 100<br>µg/ml | 10.2  | N |
| Anise oil                               | 8007-70-3  | e1k | 100<br>µg/ml | 11.7  | N | 100<br>µg/ml | 7.9  | N | 100<br>µg/ml | 10.2  | N |
| Saccharin                               | 81-07-2    | e1k | 200          | -1.7  | N | 200          | 4.0  | N | 200          | 2.8   | N |
| Rhodamine B                             | 81-88-9    | e1k | 200          | 2.1   | N | 200          | 14.8 | N | 200          | 12.2  | N |

|                                                     |            |     |     |       |   |     |      |   |     |      |   |
|-----------------------------------------------------|------------|-----|-----|-------|---|-----|------|---|-----|------|---|
| Imazamethabenz                                      | 81405-85-8 | e1k | 200 | 0.7   | N | 200 | -2.0 | N | 200 | -5.7 | N |
| Tributyltetradecylphosphonium chloride              | 81741-28-8 | e1k | 200 | 100.8 | Y | 200 | 98.8 | Y | 200 | 85.1 | Y |
| 2-Hydroxyethyl acrylate                             | 818-61-1   | e1k | 200 | 0.5   | N | 200 | 14.7 | N | 200 | 13.1 | N |
| Sodium 2-nitrophenolate                             | 824-39-5   | e1k | 200 | -4.7  | N | 200 | 1.2  | N | 200 | -3.8 | N |
| Sodium 2,5-dimethylbenzenesulfonate                 | 827-19-0   | e1k | 200 | 2.1   | N | 200 | 3.5  | N | 200 | 4.1  | N |
| Sodium m-xylene-4-sulfonate                         | 827-21-4   | e1k | 200 | -0.9  | N | 200 | 4.7  | N | 200 | 0.0  | N |
| Riboflavin                                          | 83-88-5    | e1k | 190 | 6.6   | N | 180 | 17.1 | N | 180 | 28.2 | N |
| Diphenyl phosphate                                  | 838-85-7   | e1k | 200 | -0.1  | N | 200 | -1.7 | N | 200 | -6.6 | N |
| 2-Ethylhexyl trans-4-methoxycinnamate               | 83834-59-7 | e1k | 200 | 7.0   | N | 200 | 15.2 | N | 200 | 5.1  | N |
| Dicyclohexyl phthalate                              | 84-61-7    | e1k | 210 | 0.5   | N | 200 | 9.4  | N | 200 | 2.6  | N |
| 1,2,3,6-Tetrahydrophthalimide                       | 85-40-5    | e1k | 200 | -9.6  | N | 200 | -4.7 | N | 200 | -0.5 | N |
| Phthalimide                                         | 85-41-6    | e1k | 200 | 1.0   | N | 200 | 2.3  | N | 200 | -8.3 | N |
| (3,5-Dimethyl-1H-pyrazol-1-yl)methanol              | 85264-33-1 | e1k | 200 | -3.9  | N | 200 | 3.5  | N | 200 | 7.7  | N |
| Phthalic acid, diundecyl ester, branched and linear | 85507-79-5 | e1k | 200 | -0.6  | N | 200 | 5.0  | N | 200 | 2.3  | N |
| 1-Naphthaleneacetic acid                            | 86-87-3    | e1k | 200 | 0.3   | N | 200 | 7.0  | N | 200 | -0.2 | N |
| C.I. Acid Blue 74                                   | 860-22-0   | e1k | 200 | 15.9  | N | 200 | -1.9 | N | 200 | 8.7  | N |
| Dimethyl hydrogen phosphite                         | 868-85-9   | e1k | 200 | 0.9   | N | 200 | -1.6 | N | 200 | 0.4  | N |
| 7-(Dimethylamino)-4-methylcoumarin                  | 87-01-4    | e1k | 200 | 3.3   | N | 200 | 7.1  | N | 200 | -1.6 | N |
| 4-tert-Butylphenyl salicylate                       | 87-18-3    | e1k | 200 | -3.9  | N | 200 | -1.2 | N | 200 | 10.9 | N |
| Ethyl 2-methylbenzoate                              | 87-24-1    | e1k | 200 | -2.2  | N | 200 | -9.3 | N | 200 | 1.9  | N |
| Ethyl anthranilate                                  | 87-25-2    | e1k | 200 | -3.8  | N | 200 | 1.5  | N | 200 | 0.1  | N |
| Hexachloro-1,3-butadiene                            | 87-68-3    | e1k | 200 | -0.3  | N | 200 | 2.6  | N | 200 | 5.4  | N |
| S-Metolachlor                                       | 87392-12-9 | e1k | 200 | 46.2  | N | 200 | 27.2 | N | 200 | 20.6 | N |
| Monopotassium phthalate                             | 877-24-7   | e1k | 200 | -0.8  | N | 200 | 2.9  | N | 200 | 4.0  | N |
| 4-Chloro-3,5-dimethylphenol                         | 88-04-0    | e1k | 200 | 1.1   | N | 200 | 2.6  | N | 200 | -8.1 | N |
| 2,2'-Methylenebis(ethyl-6-tert-butylphenol)         | 88-24-4    | e1k | 200 | 9.1   | N | 200 | 48.9 | Y | 200 | 75.6 | Y |
| 2-tert-Butylcyclohexyl acetate                      | 88-41-5    | e1k | 200 | 0.7   | N | 200 | -1.4 | N | 200 | 2.4  | N |
| 2-Isopropylphenol                                   | 88-69-7    | e1k | 200 | 0.4   | N | 200 | 2.2  | N | 200 | 2.5  | N |
| 2-Nitroaniline                                      | 88-74-4    | e1k | 200 | 2.4   | N | 200 | 7.7  | N | 200 | 2.3  | N |
| 2-Nitrophenol                                       | 88-75-5    | e1k | 200 | -4.6  | N | 200 | -4.3 | N | 200 | 8.2  | N |
| Methyl 2-methylbenzoate                             | 89-71-4    | e1k | 200 | 0.2   | N | 200 | 1.8  | N | 200 | 0.9  | N |
| dl-Menthol                                          | 89-78-1    | e1k | 200 | -0.9  | N | 200 | 1.6  | N | 200 | -2.8 | N |
| 1,3-Dimethyl-4-nitrobenzene                         | 89-87-2    | e1k | 200 | -4.2  | N | 200 | 1.5  | N | 200 | 3.8  | N |
| 2-Ethylphenol                                       | 90-00-6    | e1k | 200 | 0.4   | N | 190 | 3.1  | N | 190 | 5.8  | N |
| Salicylaldehyde                                     | 90-02-8    | e1k | 200 | -3.5  | N | 200 | -0.6 | N | 200 | 12.2 | N |
| 2-Methoxyphenol                                     | 90-05-1    | e1k | 200 | 4.1   | N | 200 | 2.5  | N | 200 | 9.8  | N |
| 1-Naphthol                                          | 90-15-3    | e1k | 200 | 14.3  | N | 200 | 34.3 | N | 200 | 37.1 | N |



|                                        |            |     |              |       |   |              |      |   |              |       |   |
|----------------------------------------|------------|-----|--------------|-------|---|--------------|------|---|--------------|-------|---|
| N-Phenyl-1-naphthylamine               | 90-30-2    | e1k | 200          | 1.3   | N | 200          | 19.0 | N | 200          | 12.8  | N |
| 2,4,6-Tris(dimethylaminomethyl)phenol  | 90-72-2    | e1k | 200          | -0.6  | N | 200          | 0.2  | N | 200          | -1.1  | N |
| Pluronic F-127                         | 9003-11-6  | e1k | 200          | -2.5  | N | 200          | 1.1  | N | 200          | -0.4  | N |
| Polyoxyethylene monoleate              | 9004-96-0  | e1k | 100<br>µg/ml | 46.8  | N | 100<br>µg/ml | 59.5 | Y | 100<br>µg/ml | 40.3  | Y |
| Polysorbate 80                         | 9005-65-6  | e1k | 179          | 4.6   | N | 170          | 10.2 | N | 170          | 3.8   | N |
| Polydimethylsiloxane                   | 9016-00-6  | e1k | 200          | -4.7  | N | 200          | -2.4 | N | 200          | -1.0  | N |
| Polymethylene polyphenyl isocyanate    | 9016-87-9  | e1k | 200          | -4.8  | N | 200          | 1.7  | N | 200          | 2.1   | N |
| Bicalutamide                           | 90357-06-5 | e1k | 200          | -0.3  | N | 200          | 0.7  | N | 200          | -8.2  | N |
| Denatonium saccharide                  | 90823-38-4 | e1k | 200          | -1.6  | N | 200          | -0.5 | N | 200          | -3.6  | N |
| lambda-Cyhalothrin                     | 91465-08-6 | e1k | 170          | -8.1  | N | 170          | 6.2  | N | 170          | 6.3   | N |
| 3-Aminopropyltriethoxysilane           | 919-30-2   | e1k | 200          | 3.4   | N | 200          | -5.9 | N | 200          | 12.3  | N |
| 2-Chloro-4-phenylphenol                | 92-04-6    | e1k | 200          | -5.3  | N | 200          | 27.5 | N | 200          | -3.6  | N |
| 4-Phenylphenol                         | 92-69-3    | e1k | 200          | -13.6 | N | 200          | 9.4  | N | 200          | -17.0 | N |
| (Z)-3-Hexen-1-ol                       | 928-96-1   | e1k | 200          | -2.4  | N | 200          | 0.7  | N | 200          | 3.9   | N |
| 2'-Acetonaphthone                      | 93-08-3    | e1k | 200          | 2.9   | N | 200          | -4.2 | N | 200          | -8.1  | N |
| Styrene glycol                         | 93-56-1    | e1k | 200          | -1.1  | N | 200          | -2.4 | N | 200          | 1.1   | N |
| Mecoprop                               | 93-65-2    | e1k | 200          | 1.3   | N | 200          | 1.1  | N | 200          | 8.1   | N |
| 2,4,5-Trichlorophenoxyacetic acid      | 93-76-5    | e1k | 200          | -6.3  | N | 200          | 0.0  | N | 200          | 7.8   | N |
| Ethyl benzoate                         | 93-89-0    | e1k | 200          | -1.8  | N | 200          | -9.0 | N | 200          | 8.0   | N |
| (+/-)-alpha-Methylbenzyl acetate       | 93-92-5    | e1k | 200          | 0.7   | N | 200          | 1.5  | N | 200          | -8.4  | N |
| Phenyl benzoate                        | 93-99-2    | e1k | 200          | 13.7  | N | 200          | 38.7 | N | 200          | 20.4  | N |
| N-Nitrosopyrrolidine                   | 930-55-2   | e1k | 200          | 1.2   | N | 190          | 10.5 | N | 190          | -11.4 | N |
| tert-Butyl phenyl ketone               | 938-16-9   | e1k | 200          | 4.9   | N | 200          | 1.4  | N | 200          | -2.6  | N |
| Ethyl 4-methylbenzoate                 | 94-08-6    | e1k | 200          | 3.5   | N | 200          | -1.8 | N | 200          | -4.0  | N |
| Benzocaine                             | 94-09-7    | e1k | 200          | 1.9   | N | 200          | 0.7  | N | 200          | 5.8   | N |
| Benzylparaben                          | 94-18-8    | e1k | 200          | -0.5  | N | 200          | 8.4  | N | 200          | -19.6 | N |
| Isopentyl benzoate                     | 94-46-2    | e1k | 200          | 1.3   | N | 200          | 8.4  | N | 200          | -3.5  | N |
| 2-Phenylethyl benzoate                 | 94-47-3    | e1k | 200          | 0.4   | N | 200          | 4.3  | N | 200          | -3.5  | N |
| Dimethyl hexahydroterephthalate        | 94-60-0    | e1k | 200          | -2.7  | N | 200          | -1.6 | N | 200          | 0.7   | N |
| 2-Ethoxyphenol                         | 94-71-3    | e1k | 200          | -1.8  | N | 200          | -3.3 | N | 200          | 2.7   | N |
| 2,4-D 1-butyl ester                    | 94-80-4    | e1k | 200          | -3.2  | N | 200          | 3.4  | N | 200          | 0.1   | N |
| MCPB                                   | 94-81-5    | e1k | 200          | -5.8  | N | 200          | 3.7  | N | 200          | -6.6  | N |
| N,N'-Disalicylidene-1,2-diaminopropane | 94-91-7    | e1k | 200          | -3.5  | N | 200          | -9.5 | N | 200          | 6.4   | N |
| 2-Ethyl-1,3-hexanediol                 | 94-96-2    | e1k | 200          | 4.7   | N | 190          | 4.7  | N | 190          | -1.0  | N |
| 1-Phenyl-1H-pyrrole-2,5-dione          | 941-69-5   | e1k | 200          | 15.6  | N | 200          | 14.9 | N | 200          | 23.4  | N |
| Indene                                 | 95-13-6    | e1k | 200          | 6.6   | N | 200          | 25.7 | N | 200          | 29.2  | N |

|                                            |             |     |              |      |   |              |       |   |              |       |   |
|--------------------------------------------|-------------|-----|--------------|------|---|--------------|-------|---|--------------|-------|---|
| Benzothiazole                              | 95-16-9     | e1k | 200          | 3.1  | N | 200          | -0.8  | N | 200          | -2.3  | N |
| 2-(8-Heptadecenyl)-2-imidazoline-1-ethanol | 95-38-5     | e1k | 200          | 92.9 | Y | 200          | 97.2  | Y | 200          | 98.4  | Y |
| 3-Chloro-4-methylaniline                   | 95-74-9     | e1k | 210          | -0.5 | N | 200          | 5.5   | N | 200          | -1.9  | N |
| 3,4-Dichloroaniline                        | 95-76-1     | e1k | 200          | 2.9  | N | 200          | -1.4  | N | 200          | 4.5   | N |
| 1,2,4,5-Tetramethylbenzene                 | 95-93-2     | e1k | 200          | 0.1  | N | 200          | -3.3  | N | 200          | -7.5  | N |
| Trinexapac-ethyl                           | 95266-40-3  | e1k | 200          | -2.8 | N | 200          | 0.0   | N | 200          | -0.4  | N |
| Diphenamid                                 | 957-51-7    | e1k | 200          | -0.1 | N | 200          | 2.4   | N | 200          | -3.8  | N |
| Endosulfan I                               | 959-98-8    | e1k | 200          | -2.6 | N | 200          | -3.5  | N | 200          | 0.9   | N |
| 3-Chloro-1,2-propanediol                   | 96-24-2     | e1k | 200          | -1.4 | N | 190          | 8.5   | N | 190          | -12.2 | N |
| Cyclopentanol                              | 96-41-3     | e1k | 200          | -0.6 | N | 190          | -2.6  | N | 190          | -2.4  | N |
| Triphenylborane                            | 960-71-4    | e1k | 200          | -2.2 | N | 200          | 56.4  | Y | 200          | 44.9  | Y |
| 1-Chloro-2,4-dinitrobenzene                | 97-00-7     | e1k | 200          | 52.9 | Y | 200          | 86.1  | Y | 200          | 95.0  | Y |
| Dichlorophen                               | 97-23-4     | e1k | 200          | 93.6 | Y | 200          | 91.9  | Y | 200          | 98.4  | Y |
| 2-Methoxy-4-nitroaniline                   | 97-52-9     | e1k | 200          | 0.2  | N | 200          | -10.2 | N | 200          | 6.7   | N |
| Allantoin                                  | 97-59-6     | e1k | 200          | -1.7 | N | 200          | -2.1  | N | 200          | -1.4  | N |
| N-Dodecanoyl-N-methylglycine               | 97-78-9     | e1k | 200          | 9.9  | N | 190          | 8.8   | N | 190          | -0.8  | N |
| Tetrahydrofurfuryl alcohol                 | 97-99-4     | e1k | 200          | -0.6 | N | 200          | -2.7  | N | 200          | 1.6   | N |
| Furfuryl alcohol                           | 98-00-0     | e1k | 200          | 4.5  | N | 190          | 20.7  | N | 190          | 36.8  | N |
| 4-tert-Butyltoluene                        | 98-51-1     | e1k | 200          | -3.3 | N | 200          | -4.2  | N | 200          | 4.0   | N |
| 4-tert-Butylcyclohexanol                   | 98-52-2     | e1k | 200          | -1.8 | N | 200          | 0.2   | N | 200          | -9.0  | N |
| 4-tert-Butylcyclohexanone                  | 98-53-3     | e1k | 200          | -2.5 | N | 200          | -0.7  | N | 200          | 4.8   | N |
| 1-Chloro-4-(trifluoromethyl)benzene        | 98-56-6     | e1k | 200          | 2.3  | N | 200          | -3.1  | N | 200          | 8.2   | N |
| Niacinamide                                | 98-92-0     | e1k | 210          | 6.6  | N | 200          | 2.5   | N | 200          | 1.4   | N |
| Finasteride                                | 98319-26-7  | e1k | 200          | 0.9  | N | 200          | 6.6   | N | 200          | -3.5  | N |
| Benoxacor                                  | 98730-04-2  | e1k | 200          | 7.7  | N | 200          | 12.9  | N | 200          | 23.6  | N |
| Rhodamine 6G                               | 989-38-8    | e1k | 200          | 0.5  | N | 200          | 59.5  | Y | 200          | 55.6  | Y |
| 3-Dimethylaminophenol                      | 99-07-0     | e1k | 200          | 10.6 | N | 200          | 14.7  | N | 200          | 10.3  | N |
| 1,3-Benzenedicarbonyl dichloride           | 99-63-8     | e1k | 200          | -2.6 | N | 200          | 4.4   | N | 200          | 1.7   | N |
| gamma-Terpinene                            | 99-85-4     | e1k | 200          | 5.3  | N | 200          | -3.5  | N | 200          | -0.5  | N |
| alpha-Terpinene                            | 99-86-5     | e1k | 200          | 0.6  | N | 200          | 22.8  | N | 200          | 40.5  | N |
| 4-Isopropylphenol                          | 99-89-8     | e1k | 200          | -1.1 | N | 200          | -6.4  | N | 200          | 3.2   | N |
| 4-Hydroxyacetophenone                      | 99-93-4     | e1k | 200          | -1.7 | N | 200          | 6.1   | N | 200          | 10.2  | N |
| 4-Hydroxybenzoic acid                      | 99-96-7     | e1k | 200          | 2.4  | N | 200          | -2.1  | N | 200          | -6.2  | N |
| Cloquintocet-mexyl                         | 99607-70-2  | e1k | 200          | 2.1  | N | 200          | 7.1   | N | 200          | -0.5  | N |
| Hexamethyldisilazane                       | 999-97-3    | e1k | 200          | -2.8 | N | 200          | 7.6   | N | 200          | 18.2  | N |
| Igepal CO-890                              | NOCAS_47708 | e1k | 100<br>µg/ml | 4.0  | N | 100<br>µg/ml | -2.6  | N | 100<br>µg/ml | -3.1  | N |

|          |             |     |     |      |   |     |     |   |     |     |   |
|----------|-------------|-----|-----|------|---|-----|-----|---|-----|-----|---|
| Formalin | NOCAS_47796 | e1k | 208 | -0.3 | N | 200 | 0.5 | N | 200 | 5.9 | N |
|----------|-------------|-----|-----|------|---|-----|-----|---|-----|-----|---|

**Supplemental Table 7. Concentration-response results.** Chemicals that produced greater than 50% median inhibition in the single-point screening in an assay as well as a subset that produced less than 50% median inhibition were further tested in concentration-response; the 240 chemicals are organized by source, with name, CASRN, maximum concentration tested, median % inhibition at maximum concentration, and, absolute IC20, absolute IC50, and Hill slope for chemicals with Hill model as the best fit in ToxCast Pipeline (v1.0).

<sup>a</sup> Maximum concentration in concentration-response testing, in  $\mu\text{M}$  except indicated as  $\mu\text{g}/\text{ml}$  for polyoxyethylene monoleate. <sup>b</sup> Median % inhibition at maximum tested concentration for each chemical in concentration-response testing,  $n = 3$  replicates. <sup>c</sup> --, not tested in concentration-response. <sup>d</sup> NA = not applicable. The chemical did not produce an inhibition curve or the IC20 or IC50 could not be calculated because the curve did not reach 20% or 50% inhibition. <sup>e</sup> IC50 estimated at greater 500  $\mu\text{M}$  due to incomplete inhibition curve.

| Source                                         | Chemical           | CASRN       | DIO1                                  |                                                 |        |        |            | DIO2                                  |                                                 |        |                   |            | DIO3                                  |                                                 |        |        |            |
|------------------------------------------------|--------------------|-------------|---------------------------------------|-------------------------------------------------|--------|--------|------------|---------------------------------------|-------------------------------------------------|--------|-------------------|------------|---------------------------------------|-------------------------------------------------|--------|--------|------------|
|                                                |                    |             | Max conc., $\mu\text{M}$ <sup>a</sup> | % Inhibition at max conc. <sup>b</sup> , median | IC20   | IC50   | Hill slope | Max conc., $\mu\text{M}$ <sup>a</sup> | % Inhibition at max conc. <sup>b</sup> , median | IC20   | IC50              | Hill slope | Max conc., $\mu\text{M}$ <sup>a</sup> | % Inhibition at max conc. <sup>b</sup> , median | IC20   | IC50   | Hill slope |
| ToxCast phase 1_v2                             | Mesotrione         | 104206-82-8 | -- <sup>c</sup>                       | --                                              | --     | --     | --         | 200                                   | 30.1                                            | 56.14  | NA <sup>d</sup>   | -0.5       | 200                                   | 59.2                                            | 12.56  | 101.65 | -0.8       |
|                                                | Resmethrin         | 10453-86-8  | --                                    | --                                              | --     | --     | --         | 200                                   | 73.4                                            | 16.68  | 60.17             | -1.2       | 200                                   | 76.4                                            | 15.79  | 58.51  | -1.1       |
|                                                | Dicofol            | 115-32-2    | 200                                   | 69.4                                            | 35.75  | 91.95  | -1.7       | 190                                   | 78.3                                            | 50.84  | 96.49             | -2.3       | 190                                   | 95.4                                            | 9.96   | 16.22  | -2.9       |
|                                                | Chlorophene        | 120-32-1    | 200                                   | 1.0                                             | NA     | NA     | NA         | 200                                   | 46.7                                            | 111.90 | 231.75            | -3.5       | 200                                   | 76.3                                            | 119.27 | 146.15 | -8.0       |
|                                                | Fipronil           | 120068-37-3 | 200                                   | 47.9                                            | 30.78  | NA     | -1.8       | 200                                   | 74.4                                            | 11.75  | 43.74             | -1.2       | 200                                   | 101.0                                           | 0.27   | 1.16   | -0.9       |
|                                                | Cyazofamid         | 120116-88-3 | 200                                   | 62.7                                            | 21.09  | 94.51  | -1.1       | 200                                   | 52.7                                            | 48.46  | 176.57            | -1.9       | 200                                   | 22.6                                            | 165.90 | NA     | -1.7       |
|                                                | Maneb              | 12427-38-2  | 200                                   | 73.9                                            | 15.52  | 50.10  | -1.3       | --                                    | --                                              | --     | --                | --         | --                                    | --                                              | --     | --     | --         |
|                                                | Quinoxifen         | 124495-18-7 | --                                    | --                                              | --     | --     | --         | 200                                   | 63.3                                            | 4.91   | 18.72             | -1.4       | 200                                   | 88.3                                            | 0.21   | 1.29   | -0.8       |
|                                                | Fenhexamid         | 126833-17-8 | 200                                   | -13.6                                           | NA     | NA     | NA         | --                                    | --                                              | --     | --                | --         | --                                    | --                                              | --     | --     | --         |
|                                                | Captan             | 133-06-2    | 200                                   | 48.5                                            | 45.26  | 166.10 | -2.8       | --                                    | --                                              | --     | --                | --         | --                                    | --                                              | --     | --     | --         |
|                                                | Thiram             | 137-26-8    | --                                    | --                                              | --     | --     | --         | 200                                   | 36.7                                            | 50.62  | >500 <sup>e</sup> | -0.9       | 200                                   | 71.2                                            | 18.62  | 69.60  | -1.1       |
|                                                | Diclosulam         | 145701-21-9 | 200                                   | 51.8                                            | 23.84  | 161.27 | -0.9       | --                                    | --                                              | --     | --                | --         | --                                    | --                                              | --     | --     | --         |
|                                                | Emamectin benzoate | 155569-91-8 | 200                                   | 94.4                                            | 16.68  | 26.41  | -3.1       | 200                                   | 101.9                                           | 20.34  | 30.88             | -3.3       | 200                                   | 89.2                                            | 15.81  | 38.19  | -1.7       |
|                                                | Zoxamide           | 156052-68-5 | 200                                   | 98.2                                            | 8.18   | 17.01  | -1.9       | 200                                   | 94.6                                            | 3.09   | 12.86             | -1.0       | 200                                   | 56.9                                            | 26.57  | 97.30  | -1.7       |
|                                                | Alachlor           | 15972-60-8  | --                                    | --                                              | --     | --     | --         | 200                                   | 57.5                                            | 28.05  | 158.69            | -1.0       | 200                                   | 61.5                                            | 28.60  | 108.66 | -1.4       |
|                                                | Malaoxon           | 1634-78-2   | 200                                   | 5.6                                             | NA     | NA     | NA         | --                                    | --                                              | --     | --                | --         | --                                    | --                                              | --     | --     | --         |
|                                                | PFOS               | 1763-23-1   | --                                    | --                                              | --     | --     | --         | 160                                   | 54.0                                            | 75.23  | 163.67            | -3.1       | 160                                   | 23.8                                            | 186.84 | NA     | -8.0       |
|                                                | Chlorothalonil     | 1897-45-6   | 200                                   | 57.9                                            | 24.52  | 51.35  | -3.2       | 200                                   | 62.7                                            | 2.45   | 30.60             | -0.8       | 200                                   | 75.6                                            | 0.15   | 0.49   | -1.3       |
|                                                | Oryzalin           | 19044-88-3  | 200                                   | 49.0                                            | 146.06 | 206.99 | -7.0       | 200                                   | 53.4                                            | 114.26 | 187.28            | -4.0       | 200                                   | 52.8                                            | 120.61 | 185.62 | -5.9       |
|                                                | Atrazine           | 1912-24-9   | --                                    | --                                              | --     | --     | --         | 200                                   | 5.0                                             | NA     | NA                | NA         | 200                                   | 68.8                                            | 10.94  | 39.05  | -1.4       |
|                                                | Cyanazine          | 21725-46-2  | --                                    | --                                              | --     | --     | --         | 200                                   | 14.3                                            | NA     | NA                | NA         | 200                                   | 77.6                                            | 4.91   | 28.02  | -0.8       |
|                                                | Prallethrin        | 23031-36-9  | --                                    | --                                              | --     | --     | --         | 190                                   | 48.7                                            | 29.25  | 184.25            | -1.1       | 190                                   | 73.3                                            | 16.06  | 52.67  | -1.3       |
|                                                | Pirimicarb         | 23103-98-2  | --                                    | --                                              | --     | --     | --         | 200                                   | 59.6                                            | 21.88  | 109.31            | -1.0       | 200                                   | 88.6                                            | 2.15   | 11.21  | -0.9       |
|                                                | Butachlor          | 23184-66-9  | 200                                   | 66.9                                            | 18.63  | 40.57  | -2.4       | 200                                   | 75.5                                            | 6.39   | 28.09             | -1.0       | 200                                   | 64.8                                            | 13.62  | 71.02  | -1.0       |
| Captafol                                       | 2425-06-1          | 200         | 94.4                                  | 4.78                                            | 12.90  | -1.5   | 200        | 52.7                                  | 28.95                                           | 171.90 | -1.2              | 200        | 76.7                                  | 10.86                                           | 55.15  | -0.9   |            |
| Prodiamine                                     | 29091-21-2         | --          | --                                    | --                                              | --     | --     | 190        | 33.7                                  | 25.22                                           | NA     | -1.4              | 190        | 48.6                                  | 16.72                                           | 207.9  | -1.2   |            |
| Pirimiphos-methyl                              | 29232-93-7         | --          | --                                    | --                                              | --     | --     | 200        | 49.7                                  | 10.79                                           | 216.65 | -0.7              | 200        | 64.3                                  | 13.26                                           | 57.19  | -1.3   |            |
| 2,2-Bis(4-hydroxyphenyl)-1,1,1-trichloroethane | 2971-36-0          | --          | --                                    | --                                              | --     | --     | 200        | 45.6                                  | 79.21                                           | 233.81 | -1.8              | 200        | 55.6                                  | 106.41                                          | 147.33 | -8.0   |            |
| Triclosan                                      | 3380-34-5          | 200         | 106.4                                 | 39.56                                           | 49.19  | -6.7   | 200        | 92.6                                  | 45.6                                            | 85.26  | -2.1              | 200        | 107.6                                 | 62.06                                           | 73.31  | -8.0   |            |

|                 |                                                               |              |     |       |        |        |      |     |       |       |        |      |     |       |        |        |      |    |
|-----------------|---------------------------------------------------------------|--------------|-----|-------|--------|--------|------|-----|-------|-------|--------|------|-----|-------|--------|--------|------|----|
|                 | Acetochlor                                                    | 34256-82-1   | --  | --    | --     | --     | --   | 200 | 57.1  | 24.89 | 131.53 | -1.0 | 200 | 64.9  | 25.89  | 115.7  | -1.1 |    |
|                 | Fluoxastrobin                                                 | 361377-29-9  | --  | --    | --     | --     | --   | 200 | -3.5  | NA    | NA     | NA   | 200 | 56.7  | 9.96   | 59.76  | -1.3 |    |
|                 | Metolachlor                                                   | 51218-45-2   | 200 | 45.3  | 55.73  | 370.84 | -1.8 | --  | --    | --    | --     | --   | --  | --    | --     | --     | --   |    |
|                 | Fenthion                                                      | 55-38-9      | 200 | 67.8  | 3.79   | 26.38  | -0.9 | --  | --    | --    | --     | --   | --  | --    | --     | --     | --   |    |
|                 | Allethrin                                                     | 584-79-2     | --  | --    | --     | --     | --   | 190 | 56.3  | 28.27 | 131.62 | -1.5 | 190 | 71.5  | 19.64  | 67.57  | -1.3 |    |
|                 | Oxytetracycline dihydrate                                     | 6153-64-6    | 200 | 83.1  | 7.00   | 20.24  | -1.4 | 200 | 50.3  | 43.67 | 199.88 | -1.4 | 200 | 93.3  | 8.94   | 26.51  | -1.3 |    |
|                 | Fenoxaprop-ethyl                                              | 66441-23-4   | --  | --    | --     | --     | --   | 200 | 29.0  | 51.51 | NA     | -2.0 | 200 | 64.7  | 7.76   | 31.93  | -1.3 |    |
|                 | Triflumizole                                                  | 68694-11-1   | 200 | 73.8  | 13.39  | 18.79  | -5.1 | 200 | 98.1  | 0.71  | 2.87   | -1.0 | 200 | 101.9 | 0.46   | 2.25   | -0.9 |    |
|                 | Tetramethrin                                                  | 7696-12-0    | --  | --    | --     | --     | --   | 200 | 63.9  | 28.50 | 113.26 | -1.1 | 200 | -0.5  | NA     | NA     | NA   |    |
|                 | Fluazinam                                                     | 79622-59-6   | 180 | 62.4  | 15.26  | 37.03  | -2.3 | 180 | 99.9  | 0.48  | 2.21   | -0.9 | 180 | 100.6 | 0.41   | 2.03   | -0.9 |    |
|                 | Mancozeb                                                      | 8018-01-7    | 100 | 50.6  | 31.09  | 89.28  | -4.1 | 100 | 41.6  | 35.70 | 250.79 | -1.8 | 100 | 49.8  | 30.09  | 98.87  | -1.9 |    |
|                 | Rotenone                                                      | 83-79-4      | --  | --    | --     | --     | --   | 200 | 17.1  | NA    | NA     | -1.1 | 200 | 61.1  | 1.15   | 7.05   | -1.1 |    |
|                 | Azinphos-methyl                                               | 86-50-0      | 200 | 64.4  | 24.09  | 85.76  | -1.3 | --  | --    | --    | --     | --   | --  | --    | --     | --     | --   |    |
|                 | Flumiclorac-pentyl                                            | 87546-18-7   | --  | --    | --     | --     | --   | 200 | 81.8  | 21.34 | 64.50  | -1.2 | 200 | 32.6  | 107.69 | NA     | -2.6 |    |
|                 | Milbemectin (mixture of 70% Milbemecin A4, 30% Milbemycin A3) | NOCAS_34742  | --  | --    | --     | --     | --   | 190 | 34.2  | 76.87 | NA     | -1.2 | 190 | 72.1  | 30.37  | 84.43  | -1.5 |    |
| ToxCast phase 2 | 2-Benzylideneoctanal                                          | 101-86-0     | --  | --    | --     | --     | --   | 200 | 67.4  | 5.05  | 45.01  | -0.7 | 200 | 84.5  | 1.07   | 4.74   | -1.0 |    |
|                 | 17beta-Trenbolone                                             | 10161-33-8   | --  | --    | --     | --     | --   | 200 | 48.7  | 68.51 | 237.52 | -1.7 | 200 | 68.3  | 8.74   | 47.51  | -1.0 |    |
|                 | Octyl gallate                                                 | 1034-01-1    | 200 | 100.6 | 85.76  | 101.93 | -8.0 | 200 | 89.5  | 94.04 | 133.46 | -3.7 | 200 | 97.6  | 42.85  | 80.92  | -2.0 |    |
|                 | 4-Nonylphenol                                                 | 104-40-5     | 200 | 85.7  | 72.90  | 88.15  | -8.0 | 200 | 72.9  | 98.31 | 121.91 | -8.0 | 200 | 100.0 | 13.11  | 15.57  | -8.0 |    |
|                 | Tamoxifen                                                     | 10540-29-1   | 100 | 71.3  | 52.29  | 65.54  | -7.9 | 100 | 91.2  | 37.95 | 45.58  | -8.0 | 100 | 12.4  | NA     | NA     | NA   |    |
|                 | PharmaGSID_47337                                              | 1061517-62-1 | 200 | 75.2  | 106.24 | 148.74 | -4.2 | 200 | 58.1  | 54.83 | 165.44 | -1.5 | 200 | 73.0  | 100.59 | 125.35 | -8.0 |    |
|                 | Mepanipyrim                                                   | 110235-47-7  | 200 | 68.4  | 15.30  | 49.85  | -1.6 | 200 | 68    | 7.54  | 49.13  | -0.8 | 200 | 84.6  | 1.26   | 5.64   | -1.1 |    |
|                 | Glutaraldehyde                                                | 111-30-8     | --  | --    | --     | --     | --   | 200 | 39.8  | 75.42 | >500 ° | -1.8 | 200 | 87.3  | 2.61   | 11.27  | -1.0 |    |
|                 | Bis(2-chloroethyl) ether                                      | 111-44-4     | --  | --    | --     | --     | --   | 200 | -7.3  | NA    | NA     | NA   | 200 | 9.4   | NA     | NA     | NA   |    |
|                 | Dodecyltrimethylammonium chloride                             | 112-00-5     | 200 | 64.3  | 52.25  | 134.16 | -1.6 | 200 | 77.4  | 83.08 | 102.17 | -8.0 | 200 | 82.7  | 90.04  | 109.08 | -8.0 |    |
|                 | 1-Undecanol                                                   | 112-42-5     | --  | --    | --     | --     | --   | 200 | 2.5   | NA    | NA     | NA   | 200 | 79.4  | 103.92 | 126.75 | -8.0 |    |
|                 | 1-Dodecanol                                                   | 112-53-8     | --  | --    | --     | --     | --   | 200 | 4.4   | NA    | NA     | NA   | 200 | 78.3  | 58.94  | 72.23  | -8.0 |    |
|                 | 1-Tridecanol                                                  | 112-70-9     | --  | --    | --     | --     | --   | 200 | -0.7  | NA    | NA     | NA   | 200 | 71.3  | 39.32  | 65.68  | -3.5 |    |
|                 | Sodium hexyldecyl sulfate                                     | 1120-01-0    | 100 | 103.3 | 34.25  | 40.57  | -8.0 | 90  | 84.6  | 14.84 | 28.12  | -2.3 | 90  | 96.8  | 3.35   | 5.76   | -2.6 |    |
|                 | Sodium myristyl sulfate                                       | 1191-50-0    | 200 | 100.6 | 62.91  | 74.55  | -8.0 | 200 | 100.6 | 20.88 | 36.27  | -2.5 | 200 | 96.9  | 14.90  | 17.73  | -8.0 |    |
|                 | 2,4-Bis(2-methylbutan-2-yl)phenol                             | 120-95-6     | 200 | 102.8 | 33.41  | 45.55  | -4.4 | 200 | 81.6  | 48.08 | 86.60  | -2.5 | 200 | 102.4 | 15.89  | 18.9   | -8.0 |    |
|                 | TNP-470                                                       | 129298-91-5  | 60  | 64.3  | 6.34   | 36.49  | -0.9 | --  | --    | --    | --     | --   | --  | --    | --     | --     | --   | -- |
|                 | CP-100829                                                     | 135080-03-4  | 100 | 62.1  | 19.49  | 58.31  | -1.6 | --  | --    | --    | --     | --   | --  | --    | --     | --     | --   | -- |
|                 | 4-Hexylresorcinol                                             | 136-77-6     | 200 | 61.3  | 97.72  | 162.27 | -3.5 | --  | --    | --    | --     | --   | --  | --    | --     | --     | --   | -- |
|                 | Darbufelone mesylate                                          | 139340-56-0  | 100 | 73.8  | 1.35   | 4.7    | -1.3 | 100 | 65.9  | 11.53 | 50.1   | -1.1 | 100 | 85.4  | 3.49   | 17.16  | -0.8 |    |
|                 | 4-(1,1,3,3-Tetramethylbutyl)phenol                            | 140-66-9     | 200 | 102.2 | 71.56  | 84.93  | -8   | 200 | 85    | 92.42 | 111.79 | -8   | 200 | 99.4  | 55.37  | 65.82  | -8   |    |
|                 | Tannic acid                                                   | 1401-55-4    | 60  | 95.7  | 9.73   | 17.39  | -2.4 | 60  | 54.4  | 11.85 | 49.78  | -1.2 | 60  | 88.3  | 4.66   | 15.05  | -1.1 |    |
|                 | Kepon                                                         | 143-50-0     | 200 | 95.9  | 10.11  | 27.93  | -1.4 | 200 | 90.6  | 12.21 | 30.45  | -1.6 | 200 | 100.4 | 2.23   | 4.37   | -2   |    |
|                 | Bisphenol AF                                                  | 1478-61-1    | --  | --    | --     | --     | --   | 200 | 74.5  | 91.63 | 137.31 | -3.8 | 200 | 69.2  | 99.24  | 125.06 | -8   |    |
|                 | 2-Mercaptobenzothiazole                                       | 149-30-4     | 200 | 88.2  | 6.82   | 25.62  | -1.1 | 200 | 65.3  | 13.92 | 81     | -0.9 | 200 | 67.4  | 44.76  | 117.27 | -1.7 |    |
|                 | FR150011                                                      | 149413-74-1  | 200 | 102.6 | 62.28  | 99.2   | -2.7 | 200 | 67.3  | 87.96 | 143.39 | -3.2 | 200 | 80.9  | 101.88 | 124.35 | -8   |    |

|                                               |             |     |       |        |                   |      |     |       |        |        |      |     |       |        |        |      |
|-----------------------------------------------|-------------|-----|-------|--------|-------------------|------|-----|-------|--------|--------|------|-----|-------|--------|--------|------|
| Sodium dodecyl sulfate                        | 151-21-3    | --  | --    | --     | --                | --   | 200 | 76.8  | 88.86  | 109.59 | -8   | 200 | 81.6  | 86.66  | 105.83 | -8   |
| Celecoxib                                     | 169590-42-5 | 200 | 60.3  | 151.1  | 183.61            | -8.0 | 200 | 53.5  | 122.19 | 177.99 | -8.0 | 200 | 64.1  | 152.55 | 183.76 | -8.0 |
| CJ-013790                                     | 179465-71-5 | --  | --    | --     | --                | --   | 100 | 55.3  | 24.54  | 78.80  | -1.5 | 100 | 49.4  | 23.04  | 100.79 | -1.6 |
| 4-Octylphenol                                 | 1806-26-4   | 200 | 102.3 | 29.79  | 49.78             | -2.6 | 200 | 78.0  | 106.34 | 130.01 | -8.0 | 200 | 100.7 | 16.65  | 19.78  | -8.0 |
| Farglitazar                                   | 196808-45-4 | 180 | 105.4 | 45.59  | 53.97             | -8.0 | 170 | 102.2 | 19.89  | 40.78  | -1.9 | 170 | 103.8 | 40.04  | 47.49  | -8.0 |
| 4-Heptylphenol                                | 1987-50-4   | 200 | 101.7 | 53.96  | 75.51             | -4.0 | 200 | 77.2  | 97.25  | 119.04 | -8.0 | 200 | 104.4 | 53.10  | 62.95  | -8.0 |
| UK-337312                                     | 203942-49-8 | 200 | 103.2 | 40.49  | 56.55             | -4.1 | 200 | 99.3  | 24.37  | 38.04  | -3.1 | 200 | 99.5  | 54.98  | 65.36  | -8.0 |
| Oxytetracycline hydrochloride                 | 2058-46-0   | 200 | 76.8  | 14.42  | 40.24             | -1.5 | 200 | 30.6  | 117.22 | NA     | -1.4 | 200 | 60.5  | 47.25  | 135.40 | -1.6 |
| Perfluoroundecanoic acid                      | 2058-94-8   | 200 | 106.8 | 111.98 | 131.96            | -8.0 | 100 | 39.1  | 37.98  | 219.01 | -1.6 | 100 | 99.8  | 9.28   | 15.20  | -2.8 |
| CI-1029                                       | 207736-05-8 | 200 | 64.7  | 38.01  | 121.79            | -1.4 | --  | --    | --     | --     | --   | --  | --    | --     | --     | --   |
| Pentachloropyridine                           | 2176-62-7   | --  | --    | --     | --                | --   | 200 | 57.1  | 8.39   | 46.69  | -1.2 | 200 | 98.0  | 0.15   | 0.97   | -0.7 |
| SR146131 trifluoroacetate (1:1)               | 221671-62-1 | --  | --    | --     | --                | --   | 100 | 15.6  | 40.93  | NA     | -1.3 | 100 | 100.2 | 6.46   | 7.68   | -8.0 |
| Sodium dodecylbenzenesulfonate                | 25155-30-0  | 200 | 88.6  | 80.88  | 97.18             | -8.0 | 200 | 93.1  | 39.21  | 70.08  | -2.3 | 200 | 104.9 | 27.61  | 39.53  | -3.8 |
| HMR1426                                       | 262376-75-0 | 200 | 71.6  | 12.17  | 32.71             | -1.8 | 200 | 38.0  | 73.30  | NA     | -1.5 | 200 | 67.9  | 70.35  | 132.72 | -2.5 |
| Octhilinone                                   | 26530-20-1  | 210 | 52.4  | 30.11  | 175.21            | -1   | 200 | 78.7  | 3.40   | 12.18  | -1.2 | 200 | 95.4  | 3.21   | 15.16  | -0.9 |
| 1-Dodecyl-2-pyrrolidinone                     | 2687-96-9   | 200 | 83.3  | 123.37 | 148.45            | -8.0 | 200 | 38.4  | 112.40 | NA     | -8.0 | 200 | 91.2  | 68.09  | 81.71  | -8.0 |
| Dodecylbenzenesulfonic acid                   | 27176-87-0  | 200 | 103.0 | 54.35  | 64.42             | -8.0 | 200 | 96.7  | 21.31  | 42.74  | -2.0 | 200 | 98.2  | 15.68  | 18.63  | -8.0 |
| Dodecylbenzene sulfonate triethanolamine(1:1) | 27323-41-7  | 180 | 97.1  | 87.12  | 103.81            | -8.0 | 170 | 87.7  | 41.90  | 83.61  | -2.0 | 170 | 102.5 | 20.97  | 37.25  | -2.4 |
| 2,4-Bis(1-methyl-1-phenylethyl)phenol         | 2772-45-4   | --  | --    | --     | --                | --   | 200 | 57.2  | 69.20  | 147.64 | -2.7 | 200 | 85.1  | 11.43  | 19.67  | -2.8 |
| PFOS-K                                        | 2795-39-3   | 190 | 46.0  | 158.57 | 206.11            | -8.0 | 190 | 60.3  | 83.17  | 160.08 | -2.6 | 190 | 26.3  | 129.64 | NA     | -8.0 |
| UK-373911                                     | 291305-06-1 | --  | --    | --     | --                | --   | 200 | 85.8  | 19.02  | 55.35  | -1.3 | 200 | 89.4  | 8.19   | 35.09  | -0.9 |
| Isooctyl acrylate                             | 29590-42-9  | 200 | 76.8  | 12.95  | 41.03             | -1.4 | 200 | 95.8  | 4.62   | 18.67  | -1.0 | 200 | 86.7  | 7.82   | 33.96  | -0.9 |
| all-trans-Retinoic acid                       | 302-79-4    | --  | --    | --     | --                | --   | 200 | 51.3  | 34.19  | 167.44 | -1.3 | 200 | 78.5  | 8.00   | 38.64  | -0.9 |
| Procymidone                                   | 32809-16-8  | --  | --    | --     | --                | --   | 200 | 1.3   | NA     | NA     | NA   | 200 | -5.6  | NA     | NA     | NA   |
| PFDA                                          | 335-76-2    | 200 | 97.8  | 87.91  | 104.88            | -8.0 | 200 | 78.0  | 44.24  | 104.94 | -1.6 | 200 | 103.6 | 69.30  | 82.08  | -8.0 |
| SSR69071                                      | 344930-95-6 | --  | --    | --     | --                | --   | 50  | 76.8  | 4.48   | 13.76  | -1.4 | 50  | 90.1  | 1.57   | 5.13   | -1.2 |
| Elzasonan                                     | 361343-19-3 | --  | --    | --     | --                | --   | 200 | 72.3  | 94.09  | 117.40 | -8.0 | 200 | 1.1   | NA     | NA     | NA   |
| 1-Hexadecanol                                 | 36653-82-4  | --  | --    | --     | --                | --   | 100 | -6.0  | NA     | NA     | NA   | 100 | 0.3   | NA     | NA     | NA   |
| PFOA, ammonium salt                           | 3825-26-1   | --  | --    | --     | --                | --   | 200 | 0.0   | NA     | NA     | NA   | 200 | -12.8 | NA     | NA     | NA   |
| 4,4'-Sulfonylbis [2-(prop-2-en-1-yl)phenol]   | 41481-66-7  | --  | --    | --     | --                | --   | 200 | 73.3  | 85.55  | 137.81 | -3.1 | 200 | 74.9  | 21.34  | 78.30  | -1.1 |
| Cyproterone acetate                           | 427-51-0    | --  | --    | --     | --                | --   | 200 | 14.5  | NA     | NA     | NA   | 200 | 90.0  | 1.14   | 6.08   | -0.9 |
| SAR 150640                                    | 433212-21-6 | 190 | 50.1  | 59.94  | 237.05            | -1.5 | 180 | 58.0  | 81.66  | 163.60 | -2.6 | 180 | 41.8  | 100.85 | NA     | -8.0 |
| Genistein                                     | 446-72-0    | 200 | 95.5  | 0.84   | 2.62              | -1.2 | --  | --    | --     | --     | --   | --  | --    | --     | --     | --   |
| Daidzein                                      | 486-66-8    | 200 | 84.4  | 6.57   | 22.16             | -1.2 | --  | --    | --     | --     | --   | --  | --    | --     | --     | --   |
| Clomiphene citrate (1:1)                      | 50-41-9     | 200 | 80.3  | 44.33  | 76.34             | -2.9 | 200 | 99.4  | 27.62  | 45.89  | -2.7 | 200 | 1.4   | NA     | NA     | NA   |
| 6-Propyl-2-thiouracil                         | 51-52-5     | 200 | 101.1 | 1.08   | 3.81              | -1.1 | --  | --    | --     | --     | --   | --  | --    | --     | --     | --   |
| Spironolactone                                | 52-01-7     | --  | --    | --     | --                | --   | 200 | 78.1  | 6.51   | 33.13  | -0.9 | 200 | 26.3  | 91.65  | NA     | -1.8 |
| 4-Chlorobenzotrichloride                      | 5216-25-1   | --  | --    | --     | --                | --   | 200 | 51.3  | 34.04  | 229.76 | -0.9 | 200 | 73.3  | 36.76  | 89.31  | -1.7 |
| 1,2-Dinitrobenzene                            | 528-29-0    | --  | --    | --     | --                | --   | 200 | 66.2  | 18.87  | 96.53  | -0.9 | 200 | 83.3  | 8.84   | 40.51  | -0.9 |
| 1-Hydroxypyrene                               | 5315-79-7   | 200 | 42.6  | 82.07  | >500 <sup>a</sup> | -1.9 | 200 | 35.8  | 103.14 | NA     | -1.7 | 200 | 87.2  | 19.10  | 63.86  | -1.1 |
| 3,7-Dimethyl-2,6-octadienal                   | 5392-40-5   | --  | --    | --     | --                | --   | 200 | 41.2  | 82.08  | 364.78 | -2.1 | 200 | 71.2  | 13.98  | 51.52  | -1.2 |
| Gentian Violet                                | 548-62-9    | --  | --    | --     | --                | --   | 200 | 28.4  | 119.09 | NA     | -8.0 | 200 | 75.9  | 14.94  | 30.59  | -2.4 |

|                |                                 |             |     |       |       |        |      |     |       |        |        |      |     |       |        |        |      |
|----------------|---------------------------------|-------------|-----|-------|-------|--------|------|-----|-------|--------|--------|------|-----|-------|--------|--------|------|
|                | Tamoxifen citrate               | 54965-24-1  | 180 | 95.8  | 34.70 | 51.60  | -3.6 | 180 | 95.2  | 34.97  | 49.49  | -4.1 | 180 | 35.6  | 84.82  | NA     | -8.0 |
|                | 6-Methyl-2-thiouracil           | 56-04-2     | 200 | 87.9  | 3.93  | 18.38  | -0.9 | --  | --    | --     | --     | --   | --  | --    | --     | --     | --   |
|                | Benz(a)anthracene               | 56-55-3     | --  | --    | --    | --     | --   | 200 | 27.2  | 113.34 | NA     | -2.1 | 200 | 50.4  | 47.77  | 215.33 | -1.4 |
|                | Docusate sodium                 | 577-11-7    | 200 | 103   | 79.18 | 93.91  | -8.0 | 200 | 86.0  | 59.96  | 90.38  | -3.6 | 200 | 94.7  | 74.88  | 89.64  | -8.0 |
|                | Terbutylazine                   | 5915-41-3   | --  | --    | --    | --     | --   | 200 | 9.6   | NA     | NA     | NA   | 200 | 68.0  | 5.51   | 27.32  | -1.2 |
|                | Sulfasalazine                   | 599-79-1    | 200 | 87.5  | 4.42  | 23.66  | -0.8 | --  | --    | --     | --     | --   | --  | --    | --     | --     | --   |
|                | Tetracycline                    | 60-54-8     | 200 | 71.9  | 24.40 | 75.81  | -1.4 | 200 | 23.0  | 178.44 | NA     | -3.6 | 200 | 60.7  | 34.88  | 125.19 | -1.3 |
|                | 2,3-Dinitrotoluene              | 602-01-7    | --  | --    | --    | --     | --   | 140 | 63.5  | 11.88  | 52.81  | -1.1 | 140 | 78.5  | 4.35   | 22.51  | -0.9 |
|                | 1,2-Benzenedicarboxaldehyde     | 643-79-8    | 200 | 79.3  | 18.82 | 61.88  | -1.2 | 200 | 86.8  | 8.64   | 37.83  | -0.9 | 200 | 93.5  | 0.73   | 3.50   | -0.9 |
|                | Retinol                         | 68-26-8     | --  | --    | --    | --     | --   | 200 | 54.6  | 29.32  | 129.51 | -1.7 | 200 | 80.8  | 5.25   | 30.54  | -0.8 |
|                | 4-Hydroxytamoxifen              | 68392-35-8  | 130 | 95.5  | 29.22 | 49.57  | -2.4 | 120 | 107.7 | 16.88  | 31.06  | -2.1 | 120 | 56.6  | 53.18  | 71.5   | -8.0 |
|                | PharmaGSID_48519                | 686756-87-6 | --  | --    | --    | --     | --   | 200 | 16.6  | NA     | NA     | -8.0 | 200 | 1.3   | NA     | NA     | NA   |
|                | Chlorpromazine hydrochloride    | 69-09-0     | --  | --    | --    | --     | --   | 200 | 67.4  | 91.08  | 115.13 | -8.0 | 200 | 50.6  | 125.14 | 186.49 | -8.0 |
|                | Didecylmethylammonium chloride  | 7173-51-5   | 200 | 105.9 | 4.89  | 17.06  | -1.0 | 200 | 99.7  | 46.06  | 62.47  | -4.5 | 200 | 100.5 | 2.78   | 3.31   | -8.0 |
|                | AVE5638                         | 725228-45-5 | 200 | 70.9  | 63.53 | 108.25 | -3.1 | 200 | 95.6  | 4.96   | 22.77  | -0.9 | 200 | 99.7  | 2.43   | 14.56  | -0.7 |
|                | Phosmet                         | 732-11-6    | 200 | 76.8  | 10.96 | 54.32  | -0.9 | --  | --    | --     | --     | --   | --  | --    | --     | --     | --   |
|                | Diphenyl isophthalate           | 744-45-6    | --  | --    | --    | --     | --   | 200 | 40.1  | 31.25  | NA     | -1.7 | 200 | 68.9  | 17.59  | 80.09  | -1.0 |
|                | Lovastatin                      | 75330-75-5  | 200 | 78.5  | 18.62 | 63.93  | -1.2 | 200 | 25.0  | 80.12  | NA     | -8.0 | 200 | 67.8  | 68.73  | 127.32 | -2.8 |
|                | Hexachlorocyclopentadiene       | 77-47-4     | 200 | 62.5  | 48.16 | 133.91 | -1.5 | 200 | 86.8  | 5.95   | 25.53  | -1.0 | 200 | 98.9  | 0.70   | 3.30   | -0.9 |
|                | 3,3',5,5'-Tetrabromobisphenol A | 79-94-7     | 190 | 107.0 | 22.82 | 37.41  | -2.7 | 190 | 92.7  | 20.85  | 49.47  | -1.6 | 190 | 90.7  | 12.16  | 38.35  | -1.2 |
|                | Simvastatin                     | 79902-63-9  | 200 | 78.3  | 20.23 | 58.48  | -1.4 | 200 | 38.6  | 61.49  | NA     | -1.1 | 200 | 74.4  | 59.97  | 110.86 | -2.5 |
|                | Dapsone                         | 80-08-0     | 200 | -0.1  | NA    | NA     | NA   | --  | --    | --     | --     | --   | --  | --    | --     | --     | --   |
|                | Butyryl trihexyl citrate        | 82469-79-2  | 200 | -10.3 | NA    | NA     | NA   | --  | --    | --     | --     | --   | --  | --    | --     | --     | --   |
|                | Raloxifene hydrochloride        | 82640-04-8  | --  | --    | --    | --     | --   | 200 | 39.9  | 98.28  | NA     | -8.0 | 200 | 0.2   | NA     | NA     | NA   |
|                | 4-Nonylphenol, branched         | 84852-15-3  | 200 | 99.3  | 27.72 | 32.95  | -8.0 | 200 | 90.5  | 76.67  | 92.21  | -8.0 | 200 | 104.0 | 15.28  | 18.17  | -8.0 |
|                | 2,4-Di-tert-butylphenol         | 96-76-4     | 200 | 95.3  | 94.00 | 112.23 | -8.0 | 200 | 44.9  | 139.88 | NA     | -7.6 | 200 | 96.4  | 80.34  | 95.91  | -8.0 |
|                | Isoeugenol                      | 97-54-1     | --  | --    | --    | --     | --   | 200 | 40.2  | 63.11  | NA     | -1.4 | 200 | 89.7  | 4.21   | 16.70  | -1.0 |
|                | Troglitazone                    | 97322-87-7  | 200 | 99.2  | 63.64 | 75.64  | -8.0 | 200 | 89.3  | 25.33  | 63.50  | -1.5 | 200 | 97.8  | 78.40  | 93.42  | -8.0 |
|                | MK-274                          | NOCAS_47328 | --  | --    | --    | --     | --   | 200 | 27.1  | 114.00 | NA     | -8.0 | 200 | 36.8  | 169.93 | 216.97 | -8.0 |
|                | SR125047                        | NOCAS_47342 | --  | --    | --    | --     | --   | 180 | 75.6  | 42.86  | 106.16 | -1.5 | 180 | 74.1  | 11.77  | 51.48  | -1.0 |
|                | SSR 241586 HCl                  | NOCAS_47353 | --  | --    | --    | --     | --   | 120 | 76.3  | 55.97  | 68.64  | -8.0 | 120 | 20.6  | 94.05  | NA     | -7.3 |
|                | AVE6324                         | NOCAS_47377 | 200 | 80.0  | 84.07 | 102.72 | -8.0 | 200 | 98.3  | 18.62  | 41.74  | -1.7 | 200 | 86.0  | 0.37   | 1.76   | -1.0 |
|                | SARI02779                       | NOCAS_47387 | --  | --    | --    | --     | --   | 150 | 59.7  | 66.34  | 133.8  | -2.7 | 150 | 17.8  | NA     | NA     | -8.0 |
|                | HMR1171 trifluoroacetate (1:1)  | NOCAS_48522 | 80  | 47.3  | 48.67 | 84.67  | -2.8 | 70  | 74.3  | 38.05  | 47.05  | -8.0 | 70  | 44.7  | 46.24  | NA     | -8.0 |
| ToxCast<br>e1k | 2-Ethylhexyl acrylate           | 103-11-7    | 200 | 88.3  | 3.93  | 19.37  | -0.9 | 200 | 88.1  | 2.97   | 20.15  | -0.7 | 200 | 75.1  | 14.09  | 55.69  | -1.1 |
|                | Benzyl cinnamate                | 103-41-3    | --  | --    | --    | --     | --   | 200 | 51.7  | 8.09   | 185.69 | -0.9 | 200 | 74.8  | 2.24   | 11.29  | -1.1 |
|                | 4-Dodecylphenol                 | 104-43-8    | 200 | 95    | 9.23  | 37.24  | -0.9 | 200 | 86.2  | 40.92  | 74.18  | -2.5 | 200 | 101.0 | 8.37   | 11.22  | -4.7 |
|                | Heptylparaben                   | 1085-12-7   | 200 | 98.4  | 44.24 | 70.67  | -2.9 | 200 | 90.0  | 90.74  | 110.37 | -7.5 | 200 | 100.3 | 52.42  | 62.37  | -8.0 |
|                | Propanedinitrile                | 109-77-3    | --  | --    | --    | --     | --   | 190 | 51.6  | 26.84  | 363.88 | -0.8 | 190 | 59.9  | 27.06  | 129.26 | -1.1 |
|                | Oleyl sarcosine                 | 110-25-8    | 200 | 102.1 | 78.29 | 92.98  | -8.0 | 200 | 97.1  | 17.51  | 48.72  | -1.3 | 200 | 97.3  | 11.33  | 22.29  | -2.1 |
|                | Methyl linoleate                | 112-63-0    | 200 | 56.4  | 7.39  | 99.89  | -0.7 | 200 | 78.4  | 11.39  | 47.13  | -1.0 | 200 | 91.9  | 4.56   | 17.67  | -1.0 |
|                | Oleic acid                      | 112-80-1    | 200 | 95.5  | 45.66 | 68.46  | -3.4 | 200 | 79.3  | 32.86  | 93.48  | -1.3 | 200 | 97.7  | 16.91  | 29.78  | -2.5 |
|                | Octadecyl sulfate sodium salt   | 1120-04-3   | 200 | 94.4  | 71.65 | 85.79  | -8.0 | 200 | 98.0  | 18.65  | 39.42  | -1.8 | 200 | 93.4  | 1.69   | 3.26   | -2.2 |
|                | Bromophenol blue                | 115-39-9    | 190 | 69.5  | 31.75 | 89.54  | -1.5 | 180 | 67.0  | 19.05  | 62.82  | -1.5 | 180 | 93.7  | 4.85   | 16.56  | -1.1 |

|                                                |            |     |       |       |        |      |     |       |        |        |      |     |       |        |        |      |
|------------------------------------------------|------------|-----|-------|-------|--------|------|-----|-------|--------|--------|------|-----|-------|--------|--------|------|
| Dodecyl gallate                                | 1166-52-5  | 200 | 70.9  | 32.43 | 39.97  | -8.0 | 200 | 91.0  | 47.99  | 82.09  | -2.6 | 200 | 101.3 | 1.81   | 5.52   | -1.2 |
| Dichlone                                       | 117-80-6   | 200 | 86.7  | 5.22  | 25.58  | -0.9 | 200 | 94.0  | 4.02   | 22.59  | -0.7 | 200 | 92.5  | 2.84   | 12.37  | -1.0 |
| Pyrazolone T                                   | 118-47-8   | 200 | 70.5  | 21.94 | 81.34  | -1.1 | --  | --    | --     | --     | --   | --  | --    | --     | --     | --   |
| 1,3-Butyleneglycol dimethacrylate              | 1189-08-8  | --  | --    | --    | --     | --   | 200 | 66.7  | 22.84  | 89.18  | -1.1 | 200 | 71    | 17.46  | 54.66  | -1.5 |
| 2,2'-Methylenebis(4-methyl-6-tert-butylphenol) | 119-47-1   | --  | --    | --    | --     | --   | 200 | 59.3  | 88.98  | 119.84 | -8.0 | 200 | 96.2  | 11.41  | 14.57  | -5.9 |
| 4,5-Dichloro-3H-1,2-dithiol-3-one              | 1192-52-5  | 200 | 99.7  | 0.06  | 0.17   | -1.3 | 200 | 91.8  | 2.98   | 15.62  | -0.8 | 200 | 102.8 | 0.74   | 3.33   | -0.9 |
| Octylparaben                                   | 1219-38-1  | 200 | 101.2 | 64.42 | 76.55  | -8.0 | 200 | 89.6  | 58.67  | 93.38  | -3.0 | 200 | 102.0 | 18.20  | 30.19  | -2.7 |
| Pentylcinnamaldehyde                           | 122-40-7   | --  | --    | --    | --     | --   | 200 | 42.9  | 45.35  | 444.76 | -1.0 | 200 | 88.1  | 3.10   | 17.17  | -0.8 |
| Phenylacetaldehyde                             | 122-78-1   | --  | --    | --    | --     | --   | 200 | 19.8  | 228.88 | NA     | -1.5 | 200 | 57.9  | 33.75  | 138.44 | -1.3 |
| 1-Dodecanamine                                 | 124-22-1   | --  | --    | --    | --     | --   | 180 | 6.9   | NA     | NA     | NA   | 180 | 57.6  | 113.44 | 154.92 | -7.7 |
| Methyl abietate                                | 127-25-3   | --  | --    | --    | --     | --   | 200 | 37.6  | 48.88  | >500 ° | -0.8 | 200 | 68.0  | 12.81  | 64.10  | -0.9 |
| Retinol acetate                                | 127-47-9   | --  | --    | --    | --     | --   | 200 | 49.1  | 36.12  | 226.84 | -1.5 | 200 | 78.1  | 8.91   | 41.95  | -0.9 |
| C.I. Acid Orange 24, monosodium salt           | 1320-07-6  | 200 | 76.8  | 20.14 | 63.99  | -1.3 | 200 | 18.2  | NA     | NA     | -8.0 | 200 | 73.2  | 68.27  | 121.5  | -2.5 |
| C.I. Disperse Orange 37                        | 13301-61-6 | --  | --    | --    | --     | --   | 200 | 20.4  | 255.89 | NA     | -1.0 | 200 | 92.5  | 25.29  | 63.19  | -1.4 |
| Methylionone                                   | 1335-46-2  | --  | --    | --    | --     | --   | 200 | 47.1  | 87.46  | NA     | -8.0 | 200 | 71.5  | 24.76  | 81.36  | -1.2 |
| Ascorbyl palmitate                             | 137-66-6   | 200 | 51.7  | 78.94 | 136.62 | -8.0 | 200 | 97.2  | 6.91   | 26.40  | -1.0 | 200 | 97.9  | 1.19   | 4.21   | -1.1 |
| Phenol red                                     | 143-74-8   | --  | --    | --    | --     | --   | 200 | 26.5  | 118.76 | NA     | -2.1 | 200 | 47.8  | 70.27  | 222.16 | -1.5 |
| Sodium abietate                                | 14351-66-7 | --  | --    | --    | --     | --   | 200 | 40.4  | 62.30  | 410.77 | -1.2 | 200 | 66.3  | 30.25  | 104.2  | -1.3 |
| 4-Nitrosodiphenylamine                         | 156-10-5   | --  | --    | --    | --     | --   | 200 | 52.2  | 44.51  | 181.61 | -1.2 | 200 | 54.7  | 23.89  | 156.37 | -1.0 |
| 5-Ethylidene-2-norbornene                      | 16219-75-3 | --  | --    | --    | --     | --   | 200 | 44.1  | 62.77  | >500 ° | -1.5 | 200 | 71.8  | 18.15  | 67.78  | -1.2 |
| Bisphenol A diglycidyl ether                   | 1675-54-3  | 200 | 103.6 | 0.36  | 1.32   | -1.0 | 200 | 101.4 | 1.20   | 3.73   | -1.2 | 200 | 94.1  | 0.86   | 4.09   | -0.9 |
| Phenylparaben                                  | 17696-62-7 | --  | --    | --    | --     | --   | 200 | 42.3  | 60.38  | 388.77 | -1.5 | 200 | 69.2  | 16.07  | 70.79  | -1.0 |
| 2,2'-(Tetraethylimino)diethanol                | 18924-66-8 | 200 | 94.1  | 5.08  | 28.78  | -0.7 | 200 | 94.6  | 21.72  | 41.27  | -2.2 | 200 | 93.0  | 4.49   | 7.78   | -2.6 |
| Propachlor                                     | 1918-16-7  | 200 | 94.7  | 6.32  | 29.73  | -0.8 | --  | --    | --     | --     | --   | --  | --    | --     | --     | --   |
| (2-Dodeceny)succinic anhydride                 | 19780-11-1 | 200 | 50.0  | 19.71 | NA     | -1.5 | 200 | 45.3  | 48.67  | 252.21 | -1.2 | 200 | 65.5  | 12.72  | 70.20  | -0.9 |
| Z-Tetrachlorvinphos                            | 22248-79-9 | 200 | 91.1  | 16.98 | 48.17  | -1.3 | --  | --    | --     | --     | --   | --  | --    | --     | --     | --   |
| FD&C Green No. 3                               | 2353-45-9  | 130 | 49.5  | 51.05 | 100.48 | -3.2 | 130 | 35.8  | 58.53  | NA     | -2.8 | 130 | 86.3  | 38.16  | 60.83  | -2.9 |
| Basic Blue 7                                   | 2390-60-5  | --  | --    | --    | --     | --   | 200 | 87.0  | 21.14  | 39.03  | -2.5 | 200 | 82.4  | 4.80   | 9.89   | -2.1 |
| 4-tert-Butylbenzenethiol                       | 2396-68-1  | 200 | 80.3  | 4.89  | 21.23  | -1.0 | --  | --    | --     | --     | --   | --  | --    | --     | --     | --   |
| Econazole nitrate                              | 24169-02-6 | --  | --    | --    | --     | --   | 200 | 49.2  | 89.17  | NA     | -8.0 | 200 | 12.0  | NA     | NA     | NA   |
| Sodium 2-mercaptobenzothiolate                 | 2492-26-4  | --  | --    | --    | --     | --   | 200 | 19.9  | 161.45 | NA     | -0.7 | 200 | 52.0  | 33.81  | 178.77 | -1.1 |
| Methylbenzethonium chloride                    | 25155-18-4 | 200 | 100.9 | 20.44 | 39.10  | -2.1 | 200 | 99.9  | 17.05  | 31.30  | -2.3 | 200 | 100.9 | 5.32   | 8.04   | -3.3 |
| Glyceryl monooleate                            | 25496-72-4 | --  | --    | --    | --     | --   | 200 | 75.1  | 17.69  | 56.55  | -1.5 | 200 | 85.2  | 6.94   | 24.97  | -1.1 |
| Calcium dodecylbenzene sulfonate               | 26264-06-2 | 200 | 99.8  | 60.78 | 72.41  | -8.0 | 200 | 94.1  | 16.46  | 25.59  | -3.3 | 200 | 101.2 | 13.43  | 22.42  | -2.7 |
| Dodecylphenol                                  | 27193-86-8 | 200 | 78.3  | 20.96 | 61.36  | -1.4 | 200 | 86.8  | 45.39  | 84.2   | -2.3 | 200 | 100.4 | 12.6   | 14.99  | -8.0 |
| Disodium 4,4'-bis(2-sulfostyryl)biphenyl       | 27344-41-8 | 200 | 47.6  | 98.30 | NA     | -8.0 | 200 | 26.3  | 139.89 | NA     | -2.2 | 200 | 62.0  | 84.18  | 150.43 | -2.8 |
| C.I. Direct Yellow 12                          | 2870-32-8  | 200 | 102.7 | 0.22  | 0.76   | -1.1 | 200 | 86.5  | 14.90  | 50.22  | -1.1 | 200 | 86.4  | 4.84   | 30.05  | -0.7 |
| Ethyl (2E,4Z)-deca-2,4-dienoate                | 3025-30-7  | --  | --    | --    | --     | --   | 200 | 70.6  | 14.61  | 62.99  | -1.1 | 200 | 71.8  | 14.16  | 46.10  | -1.5 |
| Isocostadecanoic acid                          | 30399-84-9 | 200 | 87.0  | 47.36 | 57.49  | -8.0 | 200 | 82.4  | 78.31  | 122.38 | -3.1 | 200 | 101.7 | 16.35  | 19.46  | -8.0 |



|                                                                              |             |     |       |        |        |      |     |       |        |        |      |     |       |        |        |      |
|------------------------------------------------------------------------------|-------------|-----|-------|--------|--------|------|-----|-------|--------|--------|------|-----|-------|--------|--------|------|
| 1,4-Dihydroxy-2-naphthoic acid                                               | 31519-22-9  | 200 | 61.0  | 15.60  | 92.48  | -0.9 | 200 | 54.8  | 29.43  | 149.21 | -1.5 | 200 | 69.5  | 17.29  | 74.70  | -1.0 |
| 1,2,5,6,9,10-Hexabromocyclododecane                                          | 3194-55-6   | 170 | -9.9  | NA     | NA     | NA   | --  | --    | --     | --     | --   | --  | --    | --     | --     | --   |
| Temephos                                                                     | 3383-96-8   | 200 | 92.9  | 0.10   | 1.34   | -0.5 | --  | --    | --     | --     | --   | --  | --    | --     | --     | --   |
| Codlure                                                                      | 33956-49-9  | --  | --    | --     | --     | --   | 200 | 65.2  | 15.15  | 31.11  | -2.9 | 200 | 72.5  | 7.62   | 28.48  | -1.3 |
| Chlorophacinone                                                              | 3691-35-8   | 200 | 68.2  | 2.94   | 65.86  | -0.4 | 200 | 48.5  | 68.65  | 233.46 | -2.0 | 200 | 79.3  | 21.77  | 70.86  | -1.1 |
| Dinocap                                                                      | 39300-45-3  | 200 | 103.5 | 32.22  | 50.57  | -3.0 | 200 | 92.9  | 3.20   | 18.22  | -0.7 | 200 | 97.8  | 1.36   | 6.38   | -0.9 |
| Myristyltrimethylammonium chlorideN,N-Trimethyltetradecan-1-aminium chloride | 4574-04-3   | 170 | 95.2  | 18.13  | 28.84  | -3.0 | 170 | 100.1 | 16.26  | 27.32  | -2.7 | 170 | 102.2 | 3.93   | 7.92   | -2.0 |
| Farnesol                                                                     | 4602-84-0   | --  | --    | --     | --     | --   | 200 | 75.2  | 11.48  | 47.63  | -1.1 | 200 | 95.0  | 2.49   | 13.96  | -0.8 |
| Linolenic acid                                                               | 463-40-1    | 200 | 93.6  | 5.54   | 19.98  | -1.1 | 200 | 77.6  | 8.89   | 31.02  | -1.2 | 200 | 93.8  | 3.79   | 13.19  | -1.1 |
| Ergocalciferol                                                               | 50-14-6     | 200 | 60.0  | 3.54   | 57.52  | -0.5 | 200 | 79.2  | 6.02   | 28.31  | -1.0 | 200 | 95.0  | 0.53   | 2.58   | -0.9 |
| Nordihydroguaiaretic acid                                                    | 500-38-9    | 200 | 79.9  | 1.56   | 11.00  | -0.8 | 200 | 72.5  | 8.59   | 34.61  | -1.2 | 200 | 97.1  | 0.01   | 0.12   | -0.6 |
| Monotridecyl phosphate                                                       | 5116-94-9   | 200 | 85.3  | 74.22  | 89.89  | -8.0 | 200 | 90.9  | 30.41  | 69.54  | -1.6 | 200 | 96.0  | 6.28   | 10.57  | -2.7 |
| Chloroallyl methenamine chloride                                             | 51229-78-8  | --  | --    | --     | --     | --   | 200 | 13.1  | NA     | NA     | NA   | 200 | 53.9  | 61.88  | 173.62 | -1.8 |
| Methyltriocetylammmonium chloride                                            | 5137-55-3   | 200 | 95.2  | 41.59  | 49.63  | -8.0 | 200 | 99.3  | 12.41  | 20.85  | -2.7 | 200 | 88.8  | 3.21   | 3.84   | -8.0 |
| 2-Ethylhexylparaben                                                          | 5153-25-3   | 200 | 100.1 | 62.80  | 74.79  | -8.0 | 200 | 87.3  | 50.12  | 87.99  | -2.5 | 200 | 100.0 | 48.44  | 57.64  | -8.0 |
| Tetradecanoic acid                                                           | 544-63-8    | 200 | 52.3  | 160.30 | 196.69 | -8.0 | 200 | 47.3  | 82.97  | 214.31 | -2.0 | 200 | 69.7  | 111.03 | 138.11 | -8.0 |
| Chlorhexidine diacetate                                                      | 56-95-1     | 200 | 87.4  | 1.24   | 13.05  | -0.6 | 200 | 99.2  | 5.70   | 13.09  | -1.7 | 200 | 103.0 | 1.31   | 2.58   | -2.0 |
| Hexadecyltrimethylammonium bromide                                           | 57-09-0     | 200 | 96.2  | 5.87   | 12.90  | -1.8 | 200 | 101.0 | 16.65  | 19.87  | -8.0 | 200 | 97.4  | 0.96   | 1.59   | -2.8 |
| C.I. Acid Orange 8, monosodium salt                                          | 5850-86-2   | --  | --    | --     | --     | --   | 200 | 15.5  | NA     | NA     | NA   | 200 | 12.6  | NA     | NA     | NA   |
| 2-Chloro-N-phenylacetamide                                                   | 587-65-5    | 200 | 104.8 | 7.04   | 18.82  | -1.4 | --  | --    | --     | --     | --   | --  | --    | --     | --     | --   |
| Tetradecanoic acid, 2,3-dihydroxypropyl ester                                | 589-68-4    | --  | --    | --     | --     | --   | 200 | 32.8  | 102.17 | NA     | -1.7 | 200 | 42.0  | 43.96  | NA     | -2.2 |
| Laurocapram                                                                  | 59227-89-3  | --  | --    | --     | --     | --   | 200 | 56.2  | 92.32  | 171.80 | -2.9 | 200 | 60.6  | 75.56  | 100.11 | -8.0 |
| Linoleic acid                                                                | 60-33-3     | 200 | 96.1  | 0.69   | 10.44  | -0.5 | 200 | 77.5  | 16.31  | 49.77  | -1.4 | 200 | 101.0 | 3.73   | 14.17  | -1.0 |
| 6-Hydroxy-2-naphthyl disulfide                                               | 6088-51-3   | 200 | 92.8  | 0.48   | 2.74   | -0.8 | 200 | 84.5  | 2.69   | 21.10  | -0.7 | 200 | 102.1 | 0.57   | 3.08   | -0.8 |
| Sodium 2-phenylphenate tetrahydrate                                          | 6152-33-6   | --  | --    | --     | --     | --   | 200 | 71.5  | 9.66   | 50.25  | -0.9 | 200 | 83.1  | 48.89  | 97.54  | -2.0 |
| Benzyl-C8-18-alkyldimethylammonium chlorides                                 | 63449-41-2  | 200 | 99.8  | 20.62  | 32.04  | -3.1 | 200 | 100.6 | 15.01  | 30.27  | -2.0 | 200 | 102.5 | 4.57   | 7.80   | -2.6 |
| 4,5-Dichloro-2-octyl-3(2H)-isothiazolone                                     | 64359-81-5  | 200 | 99.3  | 0.18   | 0.44   | -1.5 | 200 | 95.0  | 2.35   | 16.95  | -0.6 | 200 | 92.5  | 2.43   | 8.45   | -1.1 |
| Morin hydrate                                                                | 654055-01-3 | 200 | 94.2  | 0.58   | 7.37   | -0.5 | 200 | 27.6  | 85.66  | NA     | -1.4 | 200 | 96.8  | 10.92  | 31.56  | -1.2 |
| Hydramethylnon                                                               | 67485-29-4  | --  | --    | --     | --     | --   | 200 | 85.7  | 16.28  | 19.77  | -8.0 | 200 | 18.4  | NA     | NA     | -8.0 |
| (Dicyclopentadienyloxy)ethyl methacrylate                                    | 68169-03-9  | --  | --    | --     | --     | --   | 200 | 83.1  | 4.39   | 18.37  | -1.0 | 200 | 86.9  | 1.69   | 8.12   | -0.9 |
| Acid Orange 156                                                              | 68555-86-2  | --  | --    | --     | --     | --   | 200 | 44.2  | 90.69  | 295.15 | -2.2 | 200 | 66.0  | 79.80  | 146.16 | -2.5 |
| C12-14-Alkyl glycidyl ether                                                  | 68609-97-2  | 119 | 64.9  | 0.76   | 4.15   | -0.9 | 110 | 47.3  | 25.57  | 108.11 | -1.3 | 110 | 58.0  | 1.41   | 16.78  | -1.0 |
| (2-Nitro-1-propenyl)benzene                                                  | 705-60-2    | --  | --    | --     | --     | --   | 200 | 76.2  | 12.46  | 54.28  | -1.0 | 200 | 55.2  | 44.29  | 162.25 | -1.5 |
| Fenoxaprop-P-ethyl                                                           | 71283-80-2  | --  | --    | --     | --     | --   | 200 | 39.9  | 22.04  | >500 ° | -0.5 | 200 | 78.4  | 2.01   | 11.59  | -0.9 |
| Oxytetracycline                                                              | 79-57-2     | 200 | 87.3  | 11.61  | 30.63  | -1.5 | 200 | 46.8  | 58.59  | 252.95 | -1.1 | 200 | 92.6  | 9.93   | 25.71  | -1.5 |

|                                             |            |     |       |       |        |      |              |      |        |        |      |              |       |        |        |      |
|---------------------------------------------|------------|-----|-------|-------|--------|------|--------------|------|--------|--------|------|--------------|-------|--------|--------|------|
| 2,2',6,6'-Tetrachlorobisphenol A            | 79-95-8    | 200 | 109.9 | 42.02 | 66.89  | -2.8 | 200          | 84.1 | 59.34  | 104.87 | -2.4 | 200          | 73.1  | 14.21  | 55.81  | -1.1 |
| Benzalkonium chloride                       | 8001-54-5  | 200 | 104.2 | 4.70  | 20.10  | -0.9 | 200          | 99.7 | 16.67  | 22.46  | -4.7 | 200          | 105.9 | 12.30  | 14.58  | -8.0 |
| Tributyltetradecylphosphonium chloride      | 81741-28-8 | 200 | 93.9  | 5.45  | 12.45  | -1.7 | 200          | 97.1 | 9.00   | 17.83  | -2.1 | 200          | 80.9  | 2.80   | 3.35   | -8.0 |
| 2,2'-Methylenebis(ethyl-6-tert-butylphenol) | 88-24-4    | --  | --    | --    | --     | --   | 200          | 48.3 | 73.11  | 206.58 | -3.6 | 200          | 80.6  | 5.77   | 11.51  | -2.3 |
| Polyoxyethylene monoleate                   | 9004-96-0  | --  | --    | --    | --     | --   | 100<br>µg/ml | 59.8 | 10.42  | 47.40  | -1.2 | 100<br>µg/ml | 50.6  | 8.64   | 80.21  | -0.9 |
| 2-(8-Heptadecenyl)-2-imidazoline-1-ethanol  | 95-38-5    | 200 | 92.9  | 6.77  | 32.61  | -0.8 | 200          | 98.6 | 34.84  | 58.85  | -2.6 | 200          | 101.0 | 3.26   | 3.88   | -8.0 |
| Triphenylborane                             | 960-71-4   | --  | --    | --    | --     | --   | 200          | 59.6 | 36.36  | 128.70 | -1.4 | 200          | 44.1  | 91.36  | 256.95 | -1.8 |
| 1-Chloro-2,4-dinitrobenzene                 | 97-00-7    | 200 | 42.0  | 70.39 | 445.59 | -1.5 | 200          | 92.1 | 7.10   | 28.31  | -1.0 | 200          | 93.7  | 2.06   | 8.39   | -1.0 |
| Dichlorophen                                | 97-23-4    | 200 | 97.9  | 84.13 | 100.16 | -8.0 | 200          | 77.4 | 58.98  | 115.12 | -2.1 | 200          | 101.3 | 39.69  | 56.71  | -3.8 |
| Rhodamine 6G                                | 989-38-8   | --  | --    | --    | --     | --   | 200          | 40.0 | 123.13 | NA     | -7.9 | 200          | 33.8  | 131.18 | NA     | -8.0 |

|   | 1 | 2 | 3 | 4 | 5 | 6 | 7 | 8 | 9 | 10 | 11 | 12 |
|---|---|---|---|---|---|---|---|---|---|----|----|----|
| A |   |   |   |   |   |   |   |   |   |    |    |    |
| B |   |   |   |   | * |   |   |   |   |    |    |    |
| C |   |   |   |   |   |   |   |   |   |    |    |    |
| D |   |   |   |   |   |   |   |   |   |    |    |    |
| E |   |   |   |   |   |   |   |   |   |    |    |    |
| F |   |   |   |   | * |   |   |   |   |    |    |    |
| G |   |   |   |   |   |   |   |   |   |    |    |    |
| H |   |   |   |   |   |   |   |   |   |    |    |    |

  

|  |   |                                                                                                                                        |
|--|---|----------------------------------------------------------------------------------------------------------------------------------------|
|  |   | Model Inhibitor Concentration Response Curve: PTU from 1000 to 0.03 $\mu$ M for DIO1, XTH from 200 to 0.0002 $\mu$ M for DIO2 and DIO3 |
|  |   | DMSO                                                                                                                                   |
|  |   | 200 $\mu$ M Model Inhibitor (PTU or XTH)                                                                                               |
|  |   | Sample                                                                                                                                 |
|  | * | Sample that is repeated on two or more chemical plates                                                                                 |

**Supplemental Figure 1.** An example layout for the assay plate for the single-point screening with single target concentration of 200  $\mu$ M. Plates were received with column 1 empty for the concentration-response curve for the model inhibitor, 6-propylthiouracil (PTU) or xanthohumol (XTH) to be added. Twelve additional wells were left empty on the source plate to which dimethyl sulfoxide (DMSO) was added to 6 of these wells (white blocks) and the model inhibitor (orange blocks) was added to the remaining 6 wells to establish the fully inhibited response level. Sample chemicals repeated across multiple plates are indicated with an asterisk. These were randomly assigned to wells on each plate. DIO1 = Deiodinase Type 1; DIO2 = Deiodinase Type 2; DIO3 = Deiodinase Type 3.

|   | 1 | 2      | 3      | 4      | 5      | 6      | 7      | 8      | 9      | 10     | 11      | 12      |
|---|---|--------|--------|--------|--------|--------|--------|--------|--------|--------|---------|---------|
| A |   | Chem 1 | Chem 2 | Chem 3 | Chem 4 | Chem 5 | Chem 6 | Chem 7 | Chem 8 | Chem 9 | Chem 10 | Chem 11 |
| B |   | Chem 1 | Chem 2 | Chem 3 | Chem 4 | Chem 5 | Chem 6 | Chem 7 | Chem 8 | Chem 9 | Chem 10 | Chem 11 |
| C |   | Chem 1 | Chem 2 | Chem 3 | Chem 4 | Chem 5 | Chem 6 | Chem 7 | Chem 8 | Chem 9 | Chem 10 | Chem 11 |
| D |   | Chem 1 | Chem 2 | Chem 3 | Chem 4 | Chem 5 | Chem 6 | Chem 7 | Chem 8 | Chem 9 | Chem 10 | Chem 11 |
| E |   | Chem 1 | Chem 2 | Chem 3 | Chem 4 | Chem 5 | Chem 6 | Chem 7 | Chem 8 | Chem 9 | Chem 10 | Chem 11 |
| F |   | Chem 1 | Chem 2 | Chem 3 | Chem 4 | Chem 5 | Chem 6 | Chem 7 | Chem 8 | Chem 9 | Chem 10 | Chem 11 |
| G |   | Chem 1 | Chem 2 | Chem 3 | Chem 4 | Chem 5 | Chem 6 | Chem 7 | Chem 8 | Chem 9 | Chem 10 | Chem 11 |
| H |   |        |        |        |        |        |        |        |        |        |         |         |

  

|  |  |                                                                                                                                        |
|--|--|----------------------------------------------------------------------------------------------------------------------------------------|
|  |  | Model Inhibitor Concentration Response Curve: PTU from 1000 to 0.03 $\mu$ M for DIO1, XTH from 200 to 0.0002 $\mu$ M for DIO2 and DIO3 |
|  |  | DMSO                                                                                                                                   |
|  |  | 200 $\mu$ M Model Inhibitor (PTU or XTH)                                                                                               |
|  |  | Sample                                                                                                                                 |

**Supplemental Figure 2.** Assay plate layout for concentration-response screening. The concentration-response curve for the model inhibitor, 6-propylthiouracil (PTU) or xanthohumol (XTH) was in column 1. Row H had 5 additional dimethyl sulfoxide (DMSO) wells (white blocks) and 6 additional wells with the model inhibitor (orange blocks) to establish the fully inhibited response level. DIO1 = Deiodinase Type 1; DIO2 = Deiodinase Type 2; DIO3 = Deiodinase Type 3.

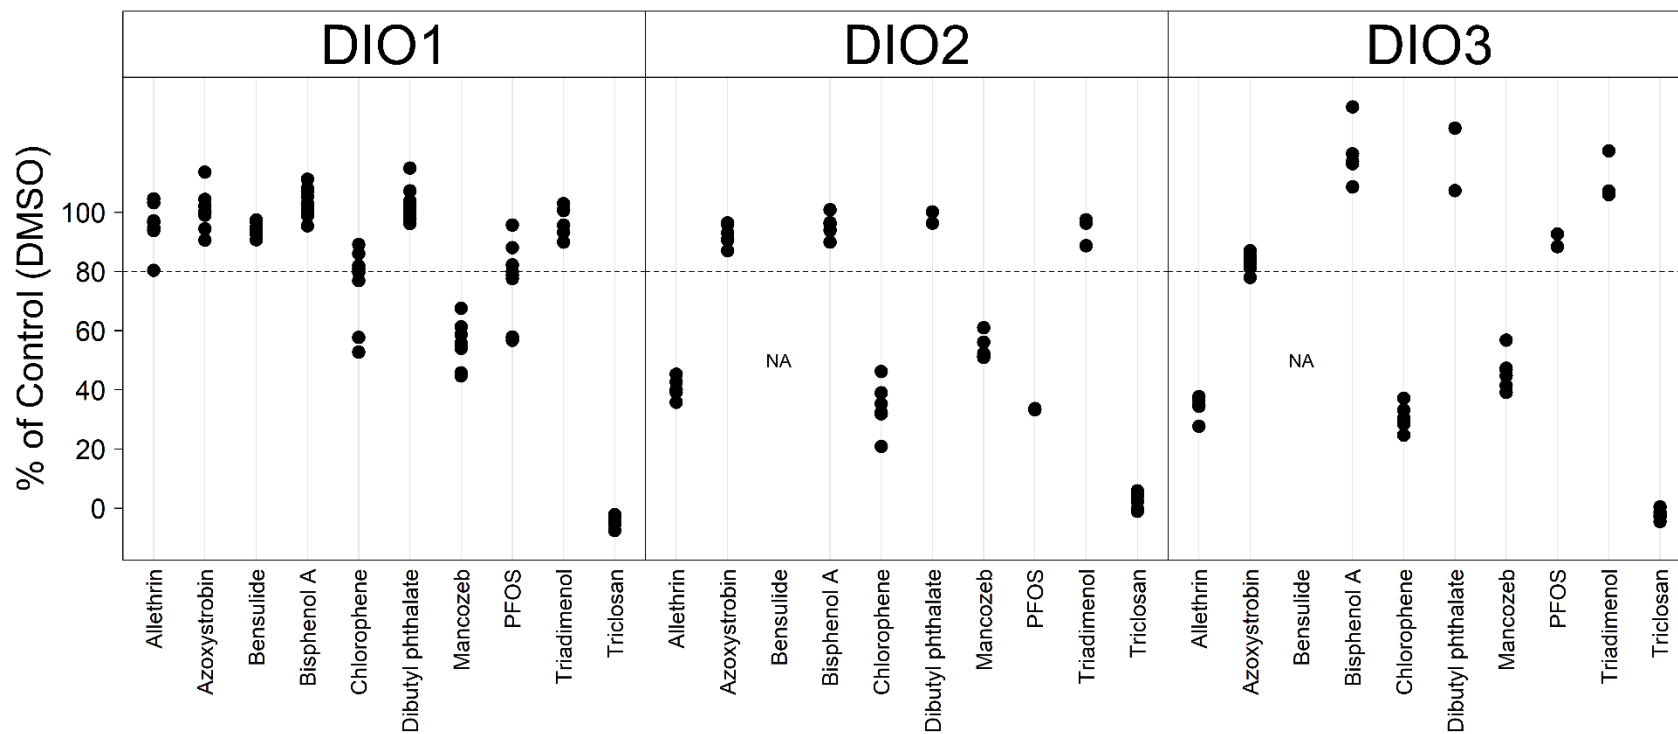

**Supplemental Figure 3.** Deiodinase inhibition produced by test chemicals that were randomly replicated across the chemical source plates to evaluate the plate-to-plate variability. These included allethrin, azoxystrobin, bensulide (DIO1 only), bisphenol A, chlorophene, dibutyl phthalate, mancozeb, perfluorooctane sulfonic acid (PFOS), triadimenol, and triclosan. NA = not replicated across plates in this assay. DMSO = dimethyl sulfoxide; DIO1 = Deiodinase Type 1; DIO2 = Deiodinase Type 2; DIO3 = Deiodinase Type 3.

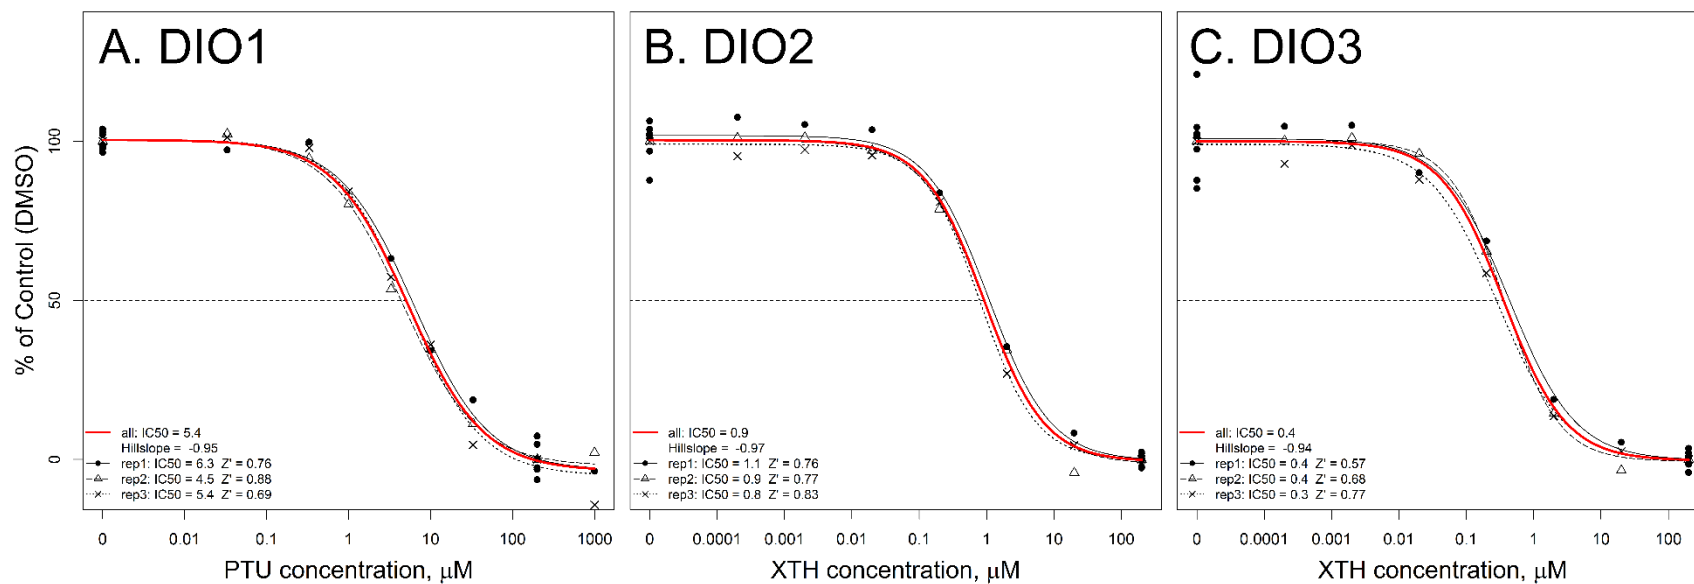

**Supplemental Figure 4.** Concentration-response curves for deiodinase inhibition by model inhibitors with 6-propylthiouracil (PTU) for DIO1 and xanthohumol (XTH) for DIO2 and DIO3 from three example assay plates. Each triplicate test of a plate has different symbols and fit line, solid circle with solid line = rep 1, open triangle with dashed line = rep 2, × with dotted line = rep 3. DMSO = dimethyl sulfoxide; DIO1 = Deiodinase Type 1; DIO2 = Deiodinase Type 2; DIO3 = Deiodinase Type 3.

**Supplemental Figure 5. Concentration-response data.** Deiodinase inhibition produced by all chemicals tested in concentration-response mode at seven concentrations. Hill model curve, absolute IC50, and Hill slope included for the chemicals where Hill model fit in ToxCast pipeline (tcpl v1.0). Results from all three assays are provided side-by-side for each chemical on the following 240 pages, with chemicals ordered by ToxCast library, matching Supplemental Table 7. DMSO = dimethyl sulfoxide; DIO1 = Deiodinase Type 1; DIO2 = Deiodinase Type 2; DIO3 = Deiodinase Type 3. NA = not applicable (Hill model did not fit data and/or 50% inhibition not produced in concentration-response testing).

Mesotrione CASRN: 104206-82-8

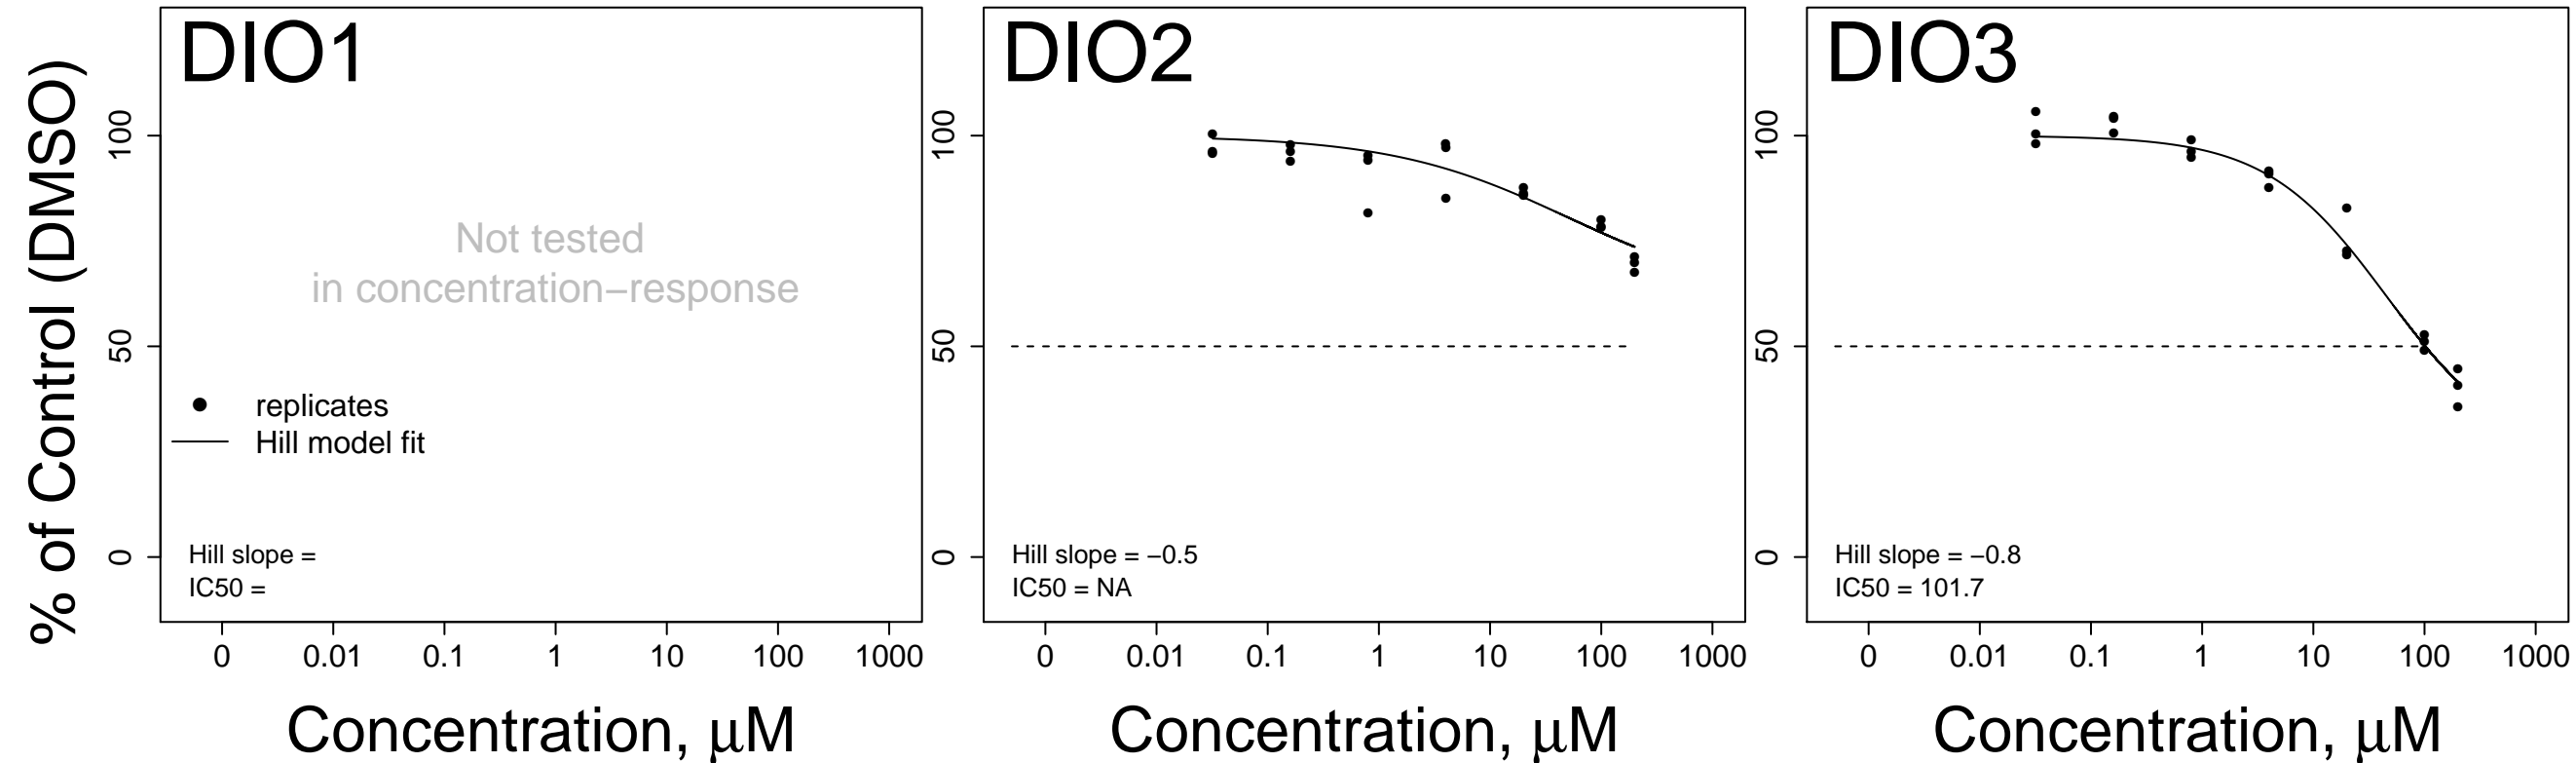

Resmethrin CASRN: 10453-86-8

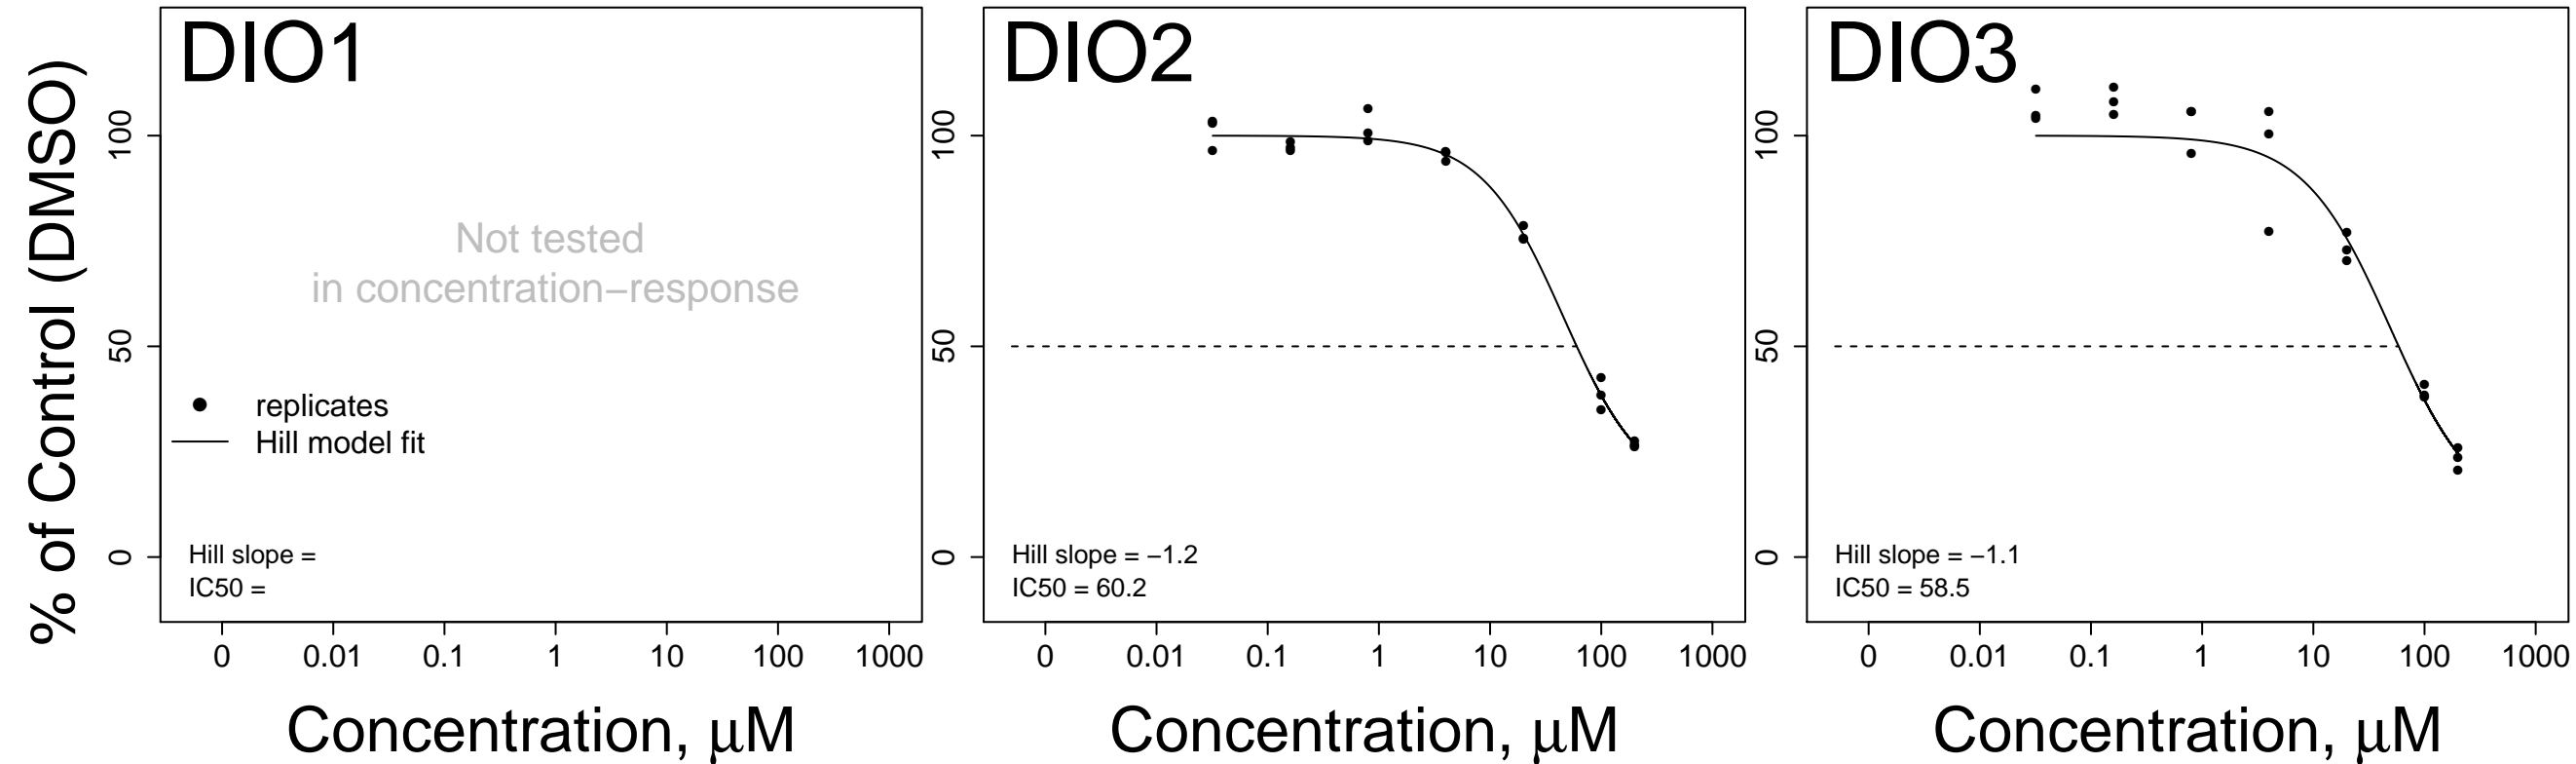



Dicofol CASRN: 115-32-2

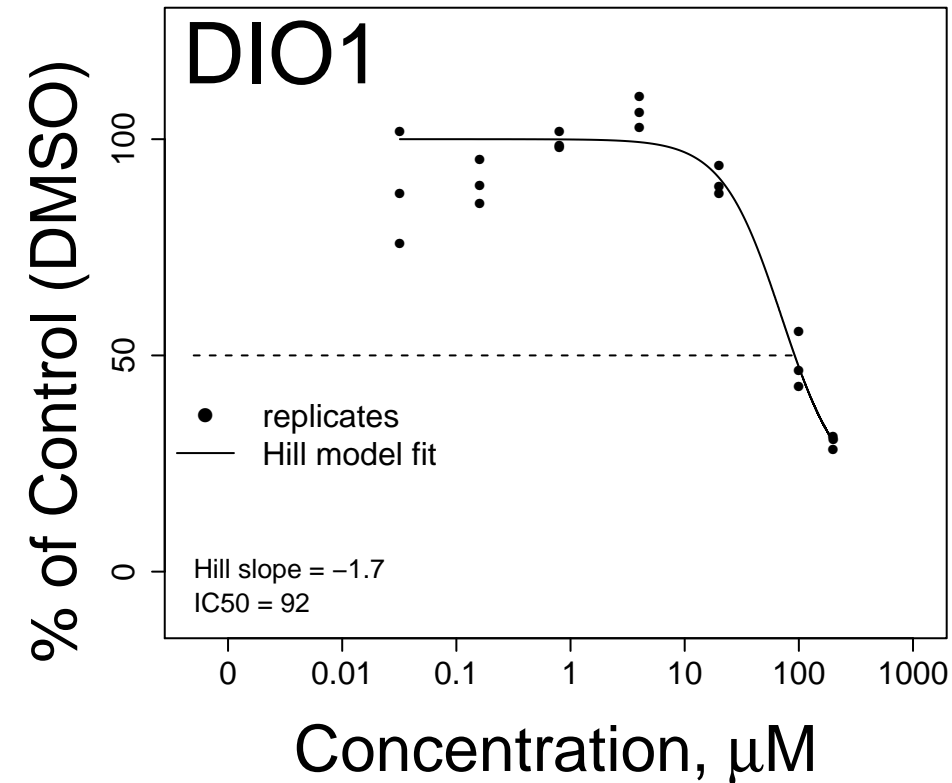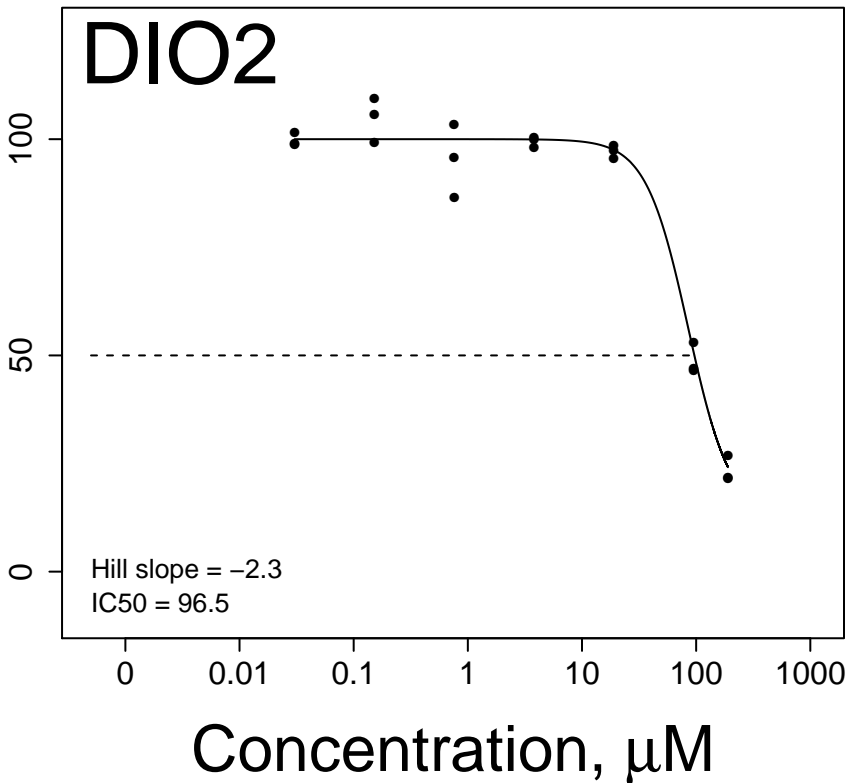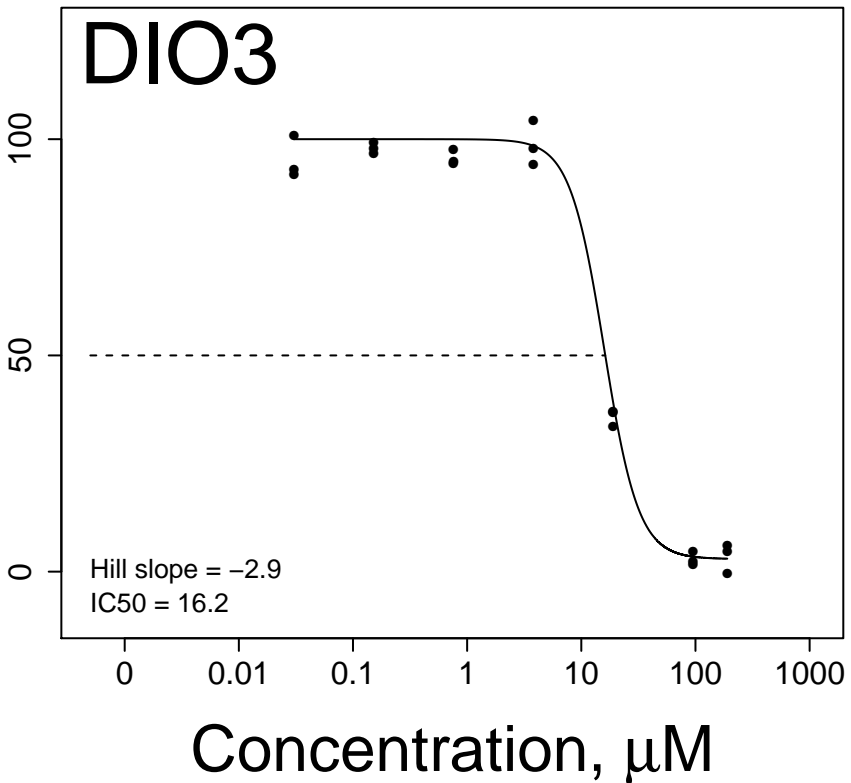

# Chlorophene CASRN: 120-32-1

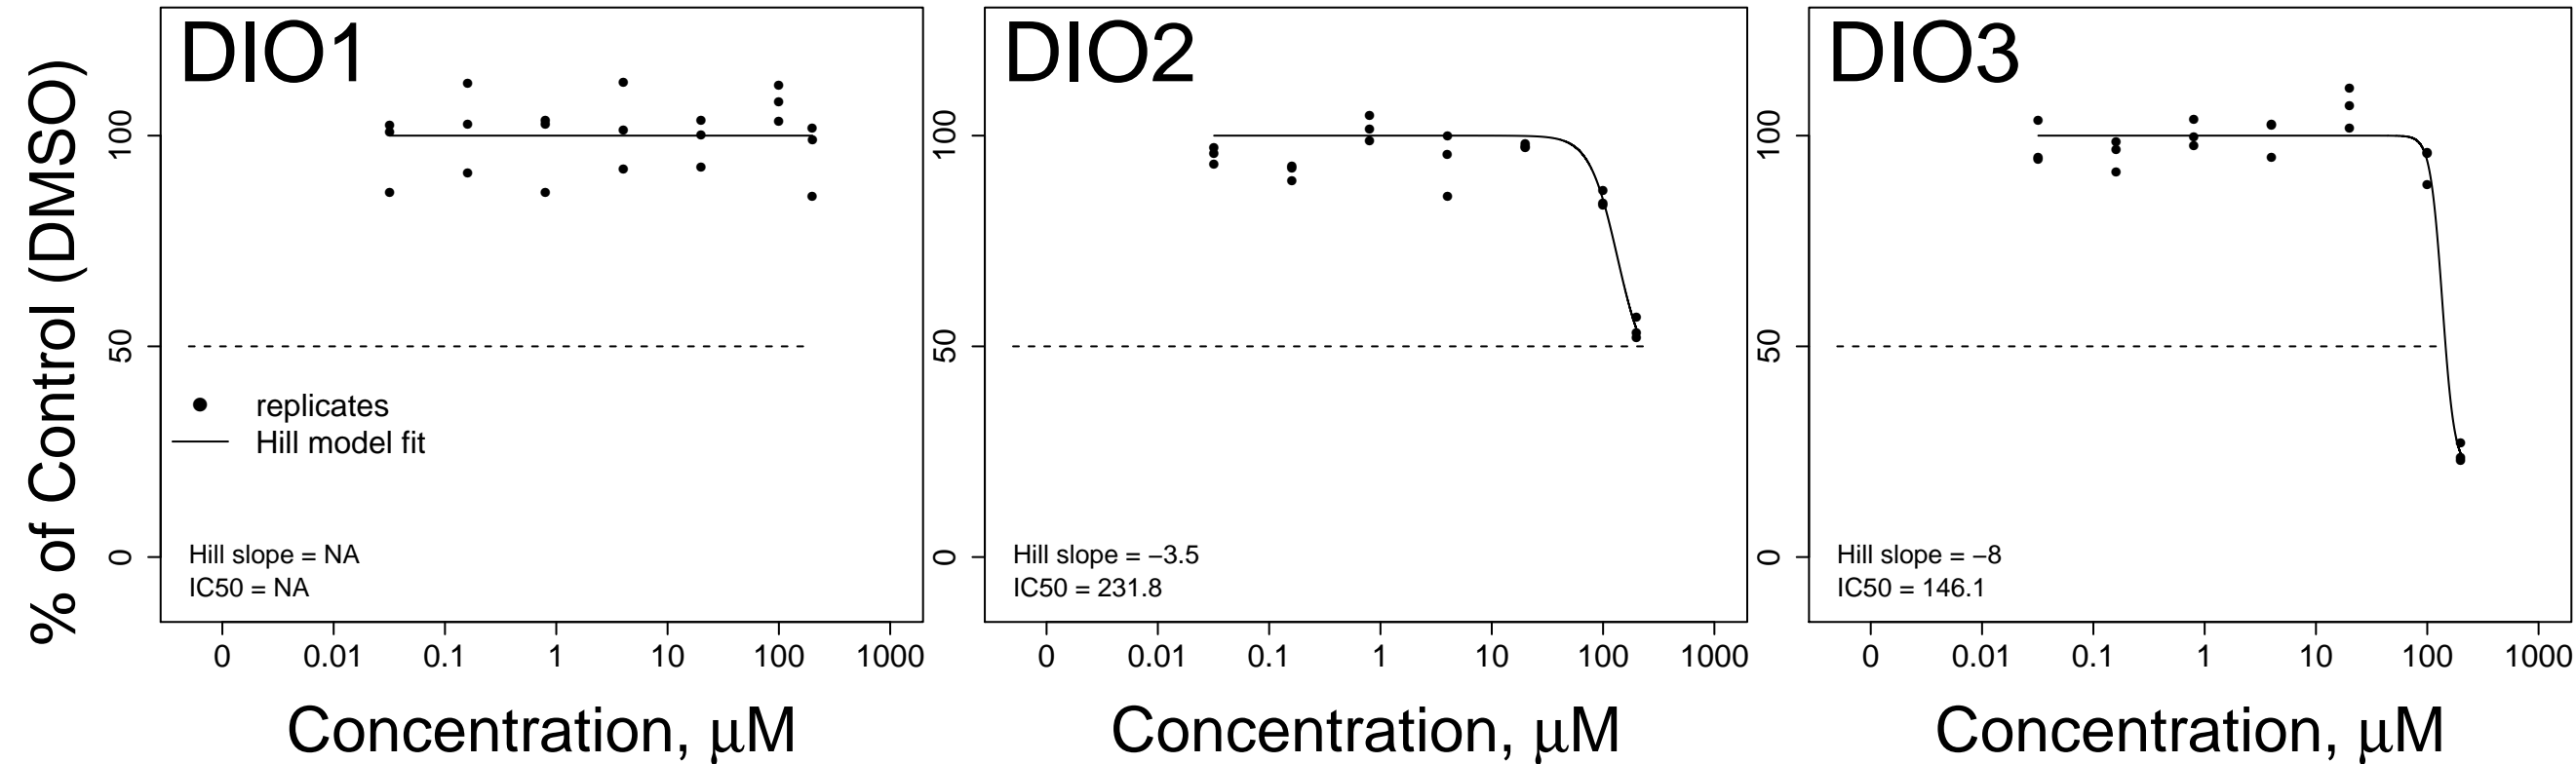

# Fipronil CASRN: 120068-37-3

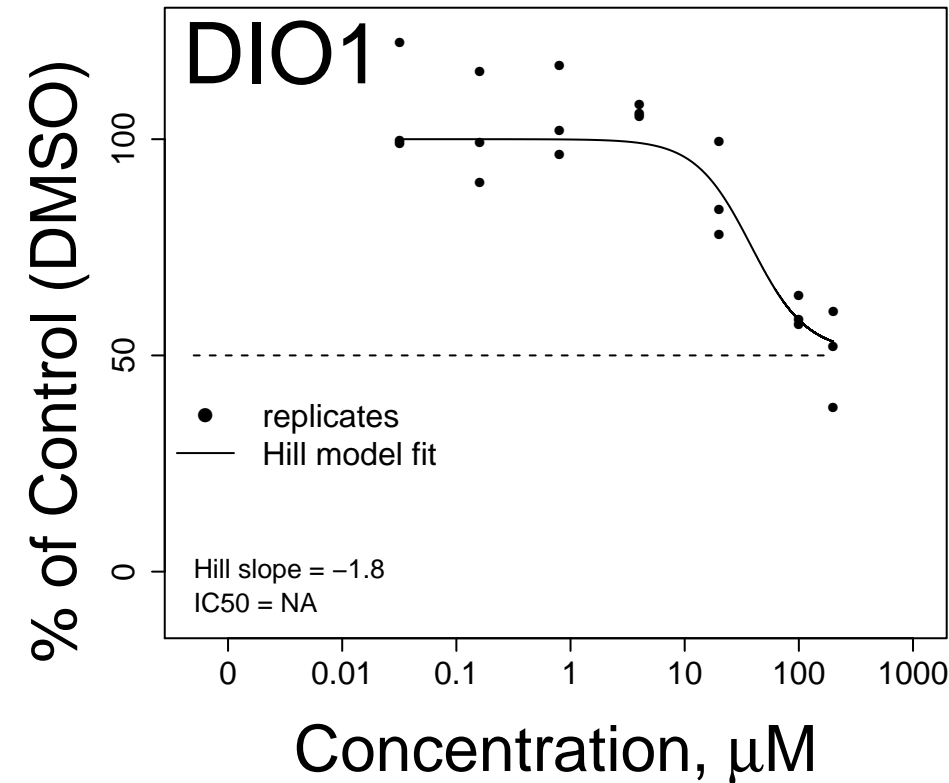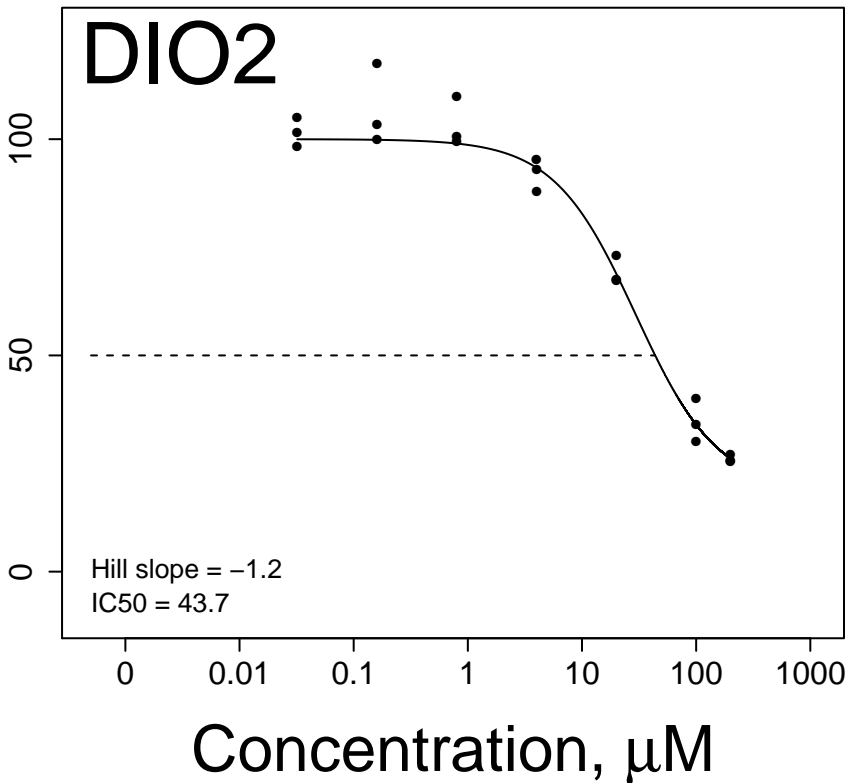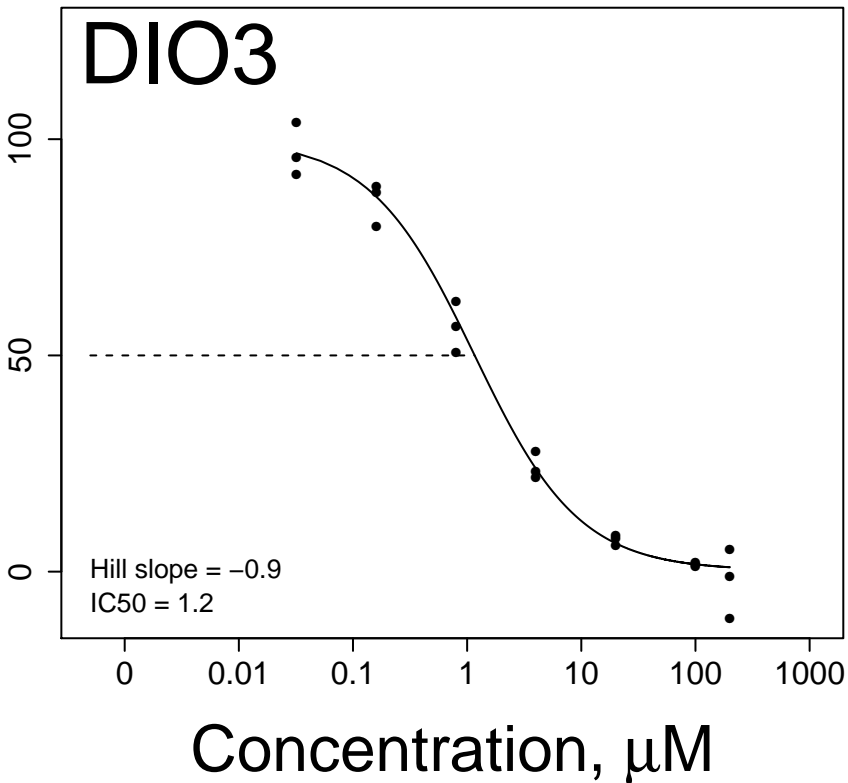

Cyazofamid CASRN: 120116-88-3

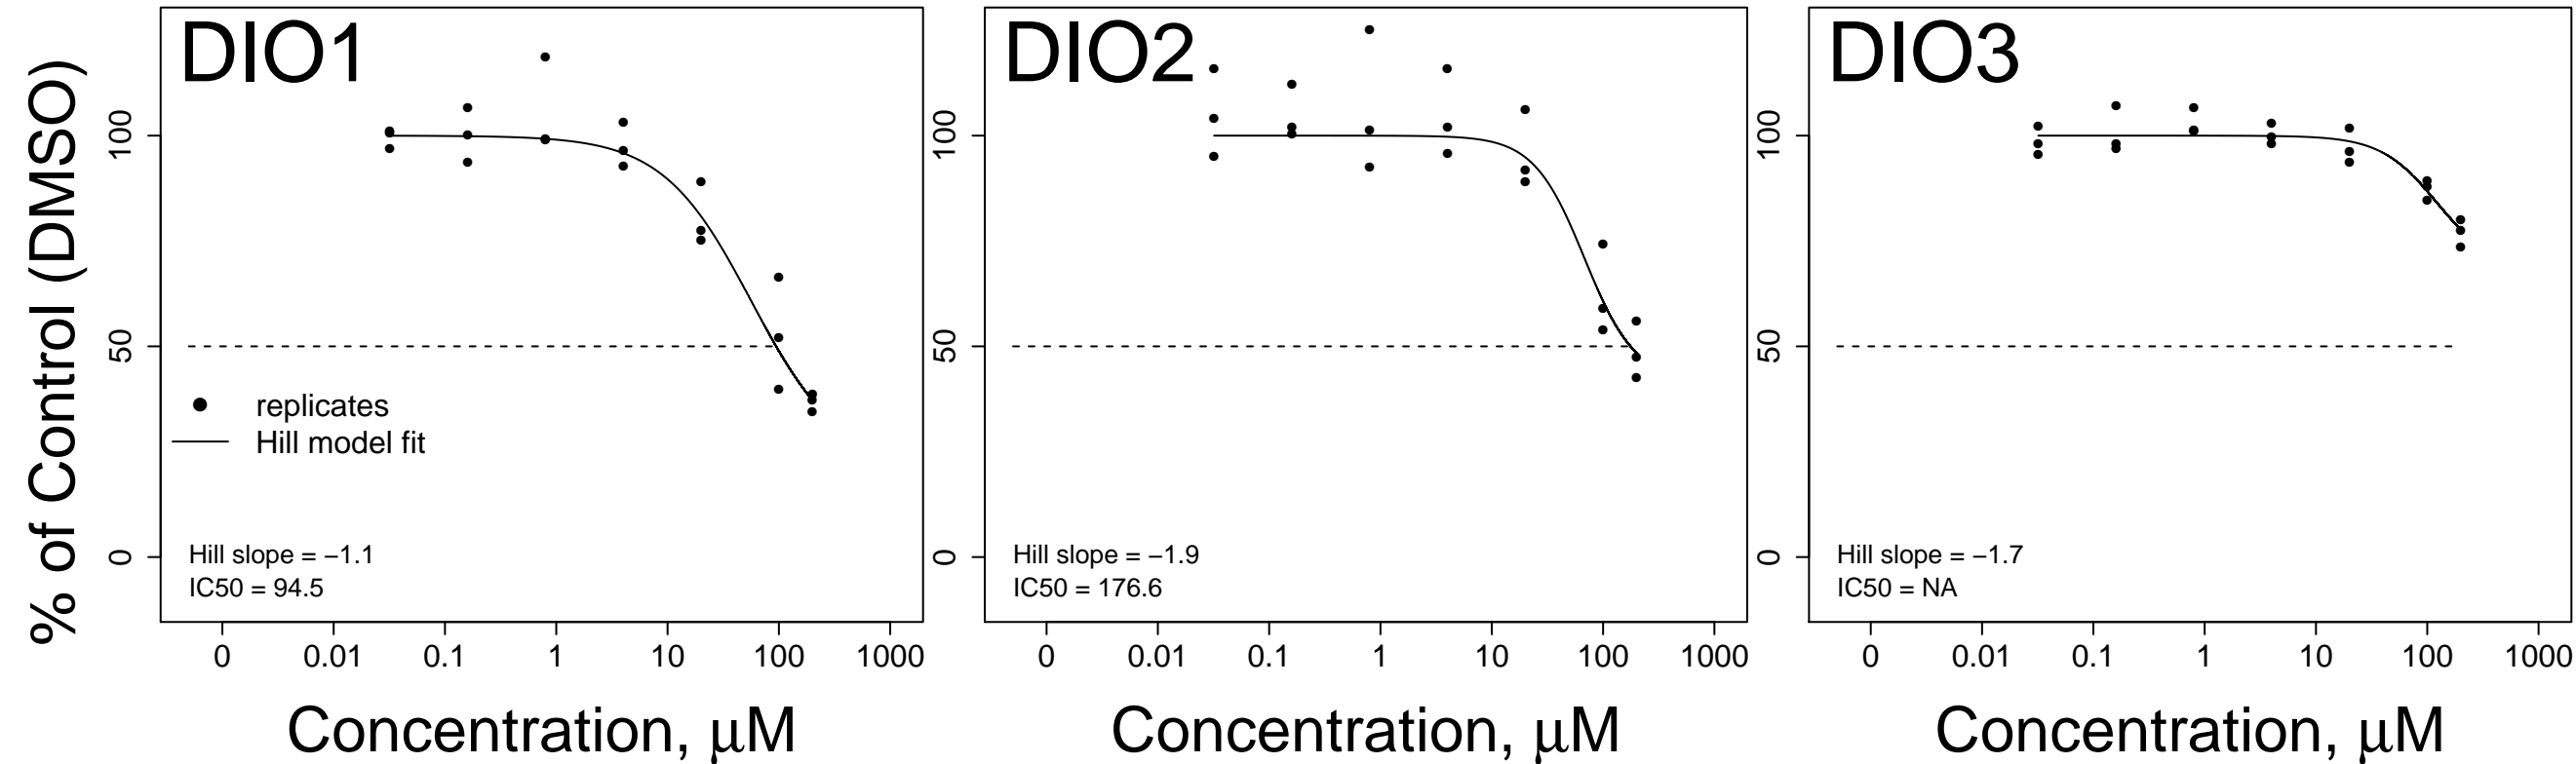

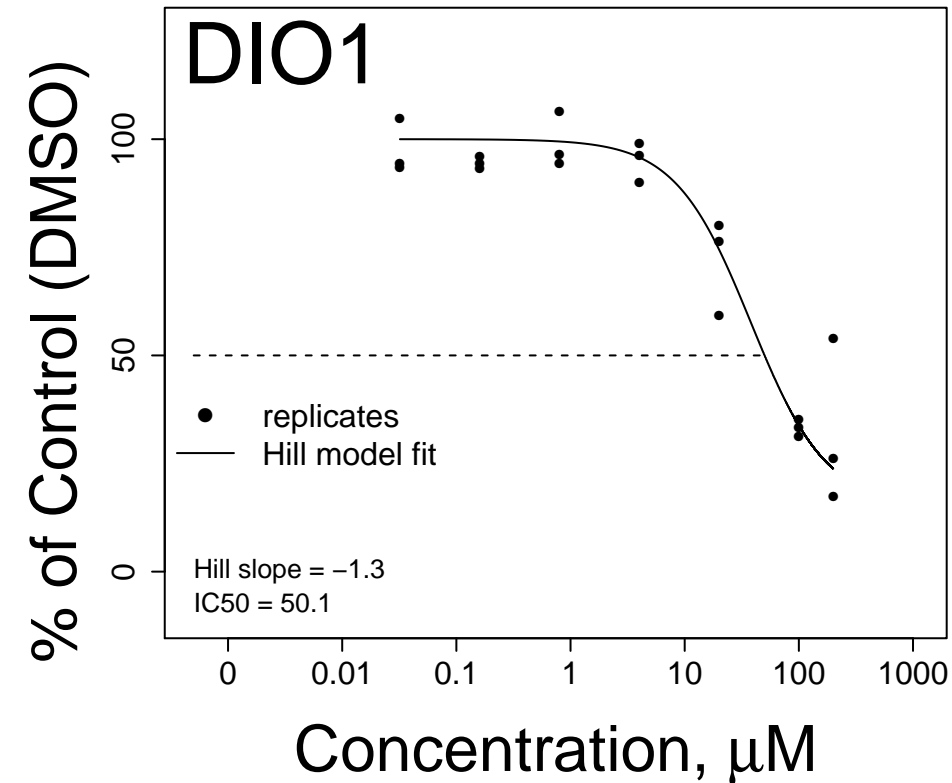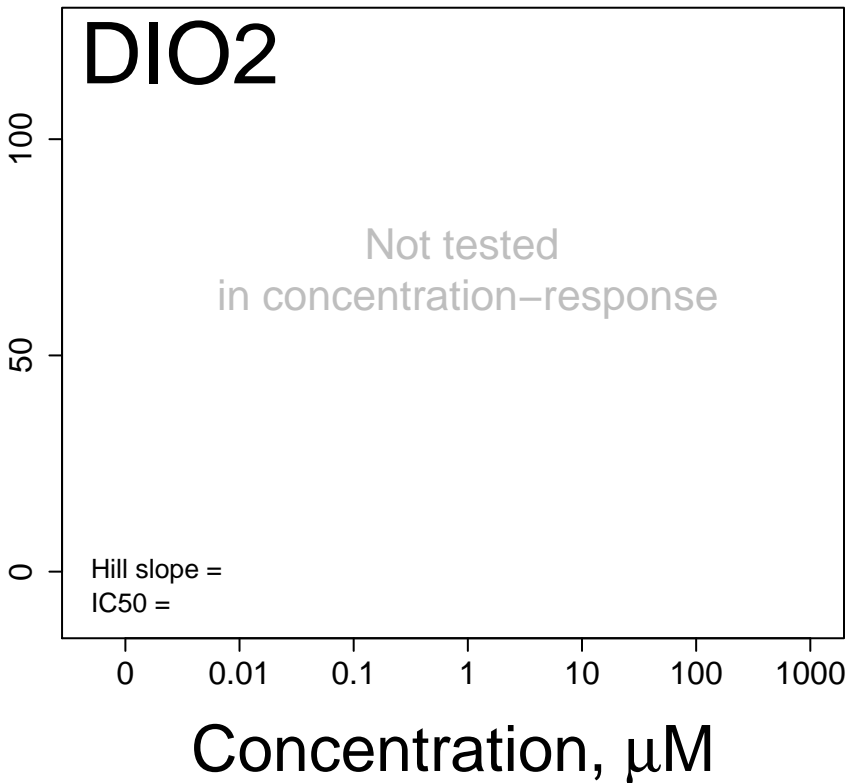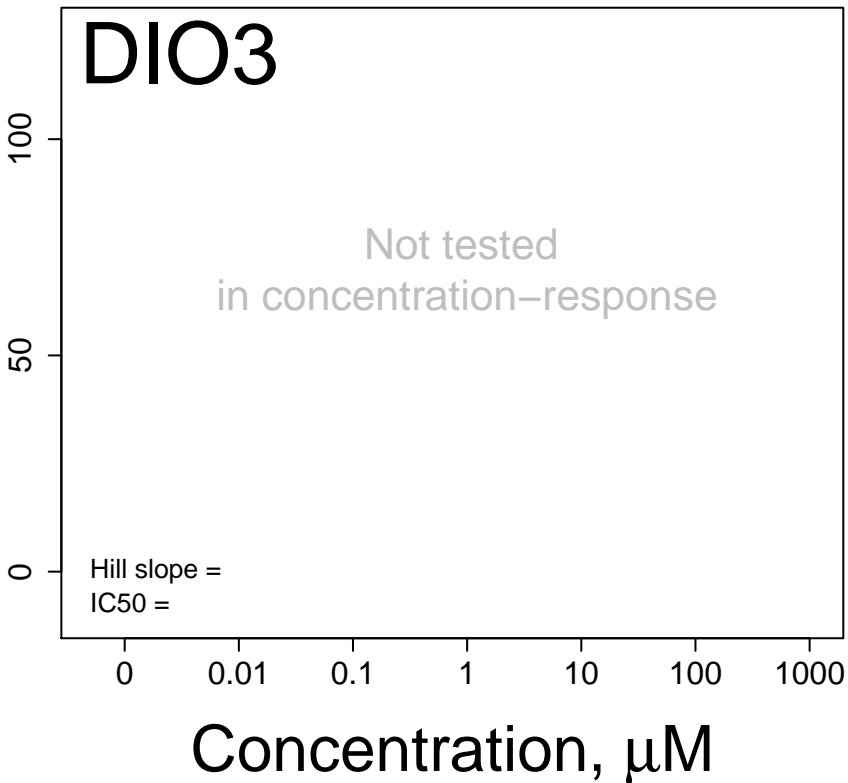

Quinoxifen CASRN: 124495-18-7

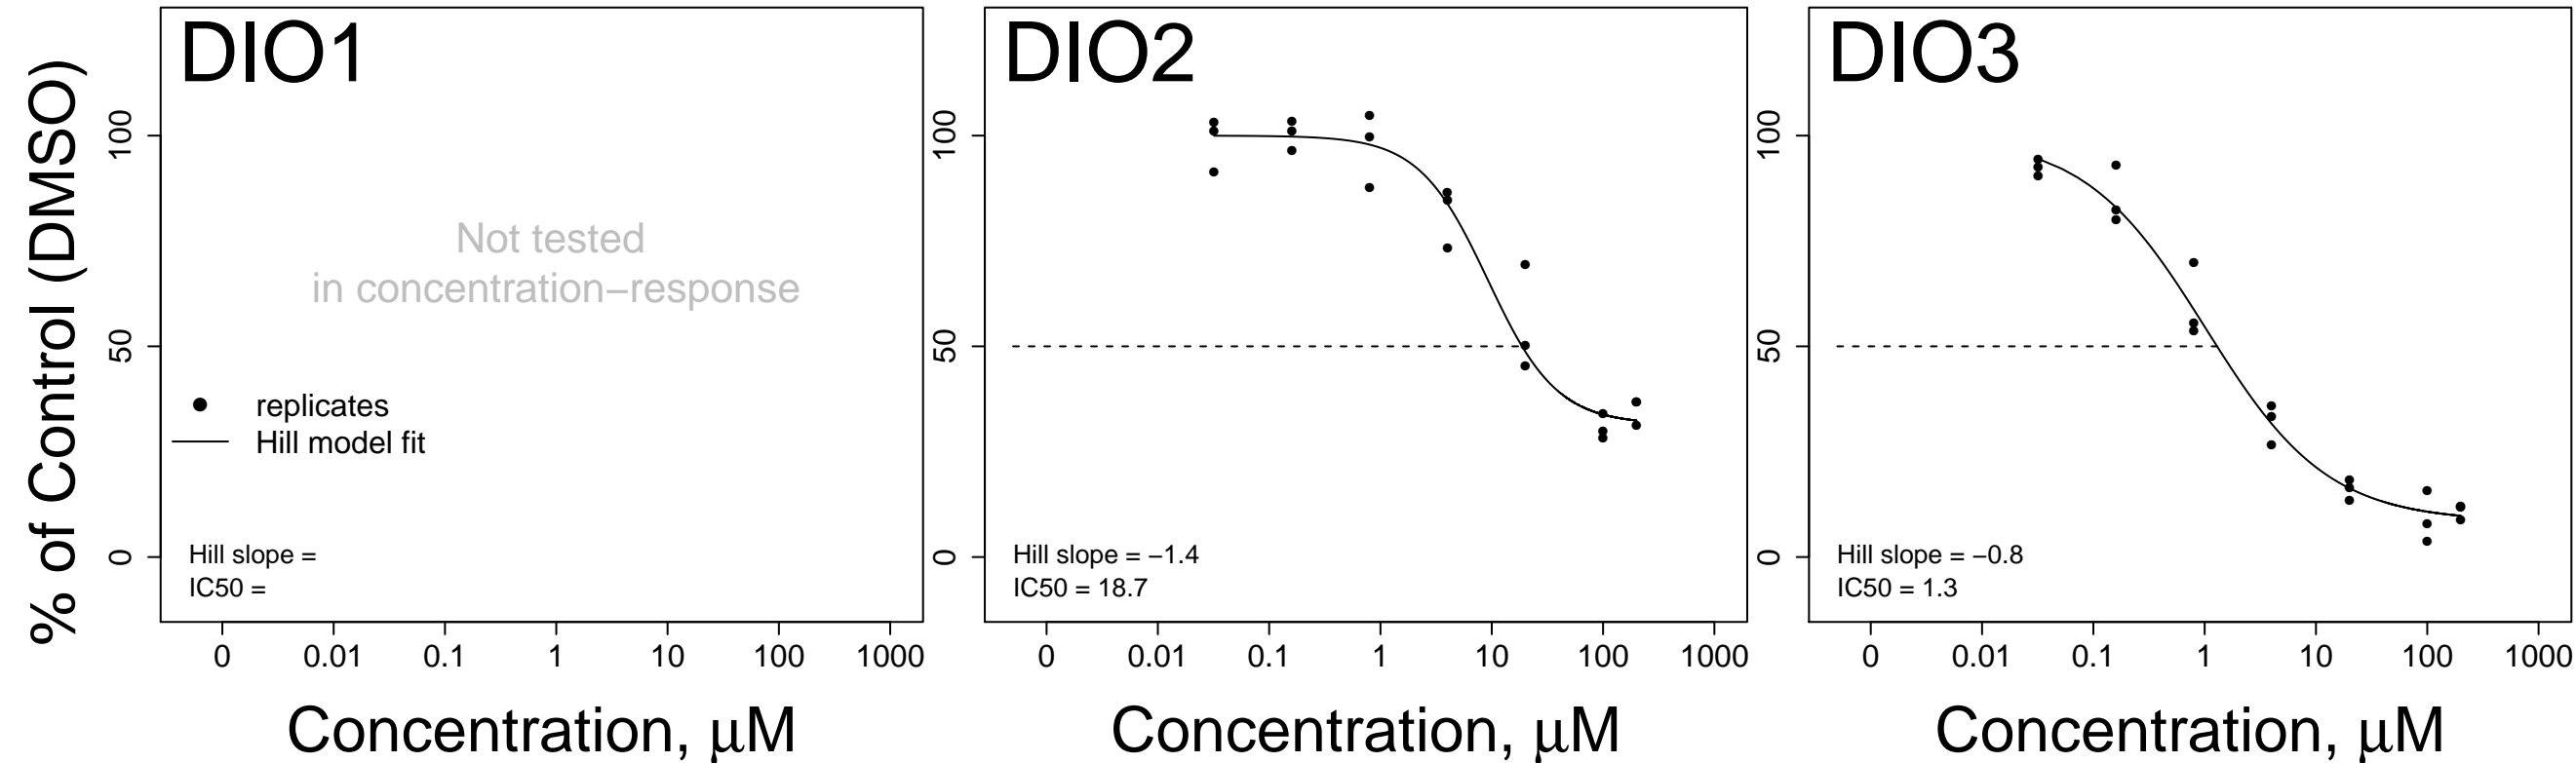

Fenhexamid CASRN: 126833-17-8

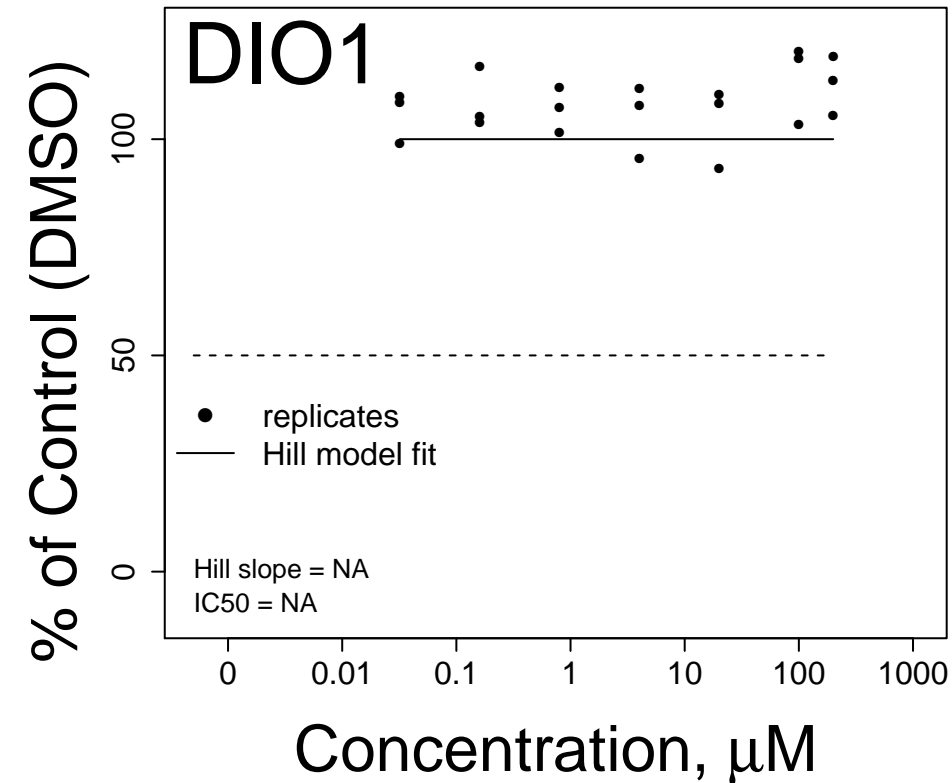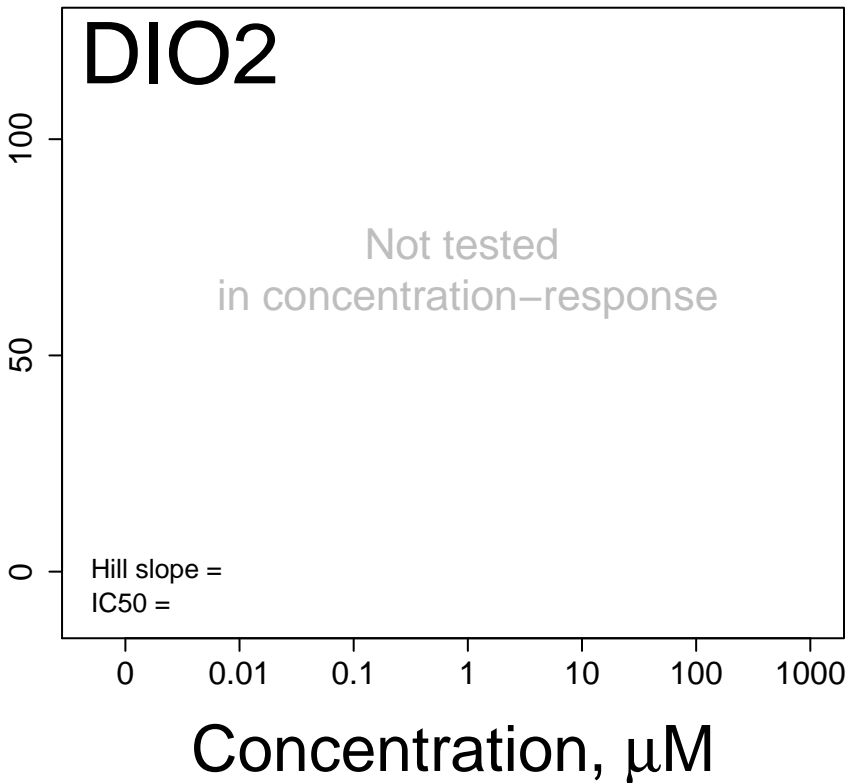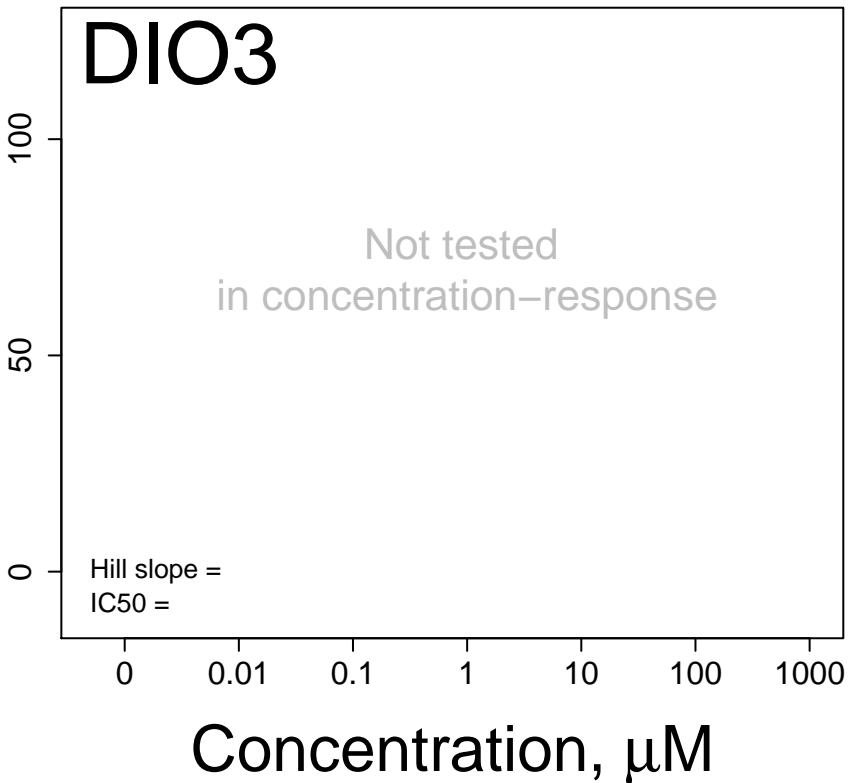

# Captan CASRN: 133-06-2

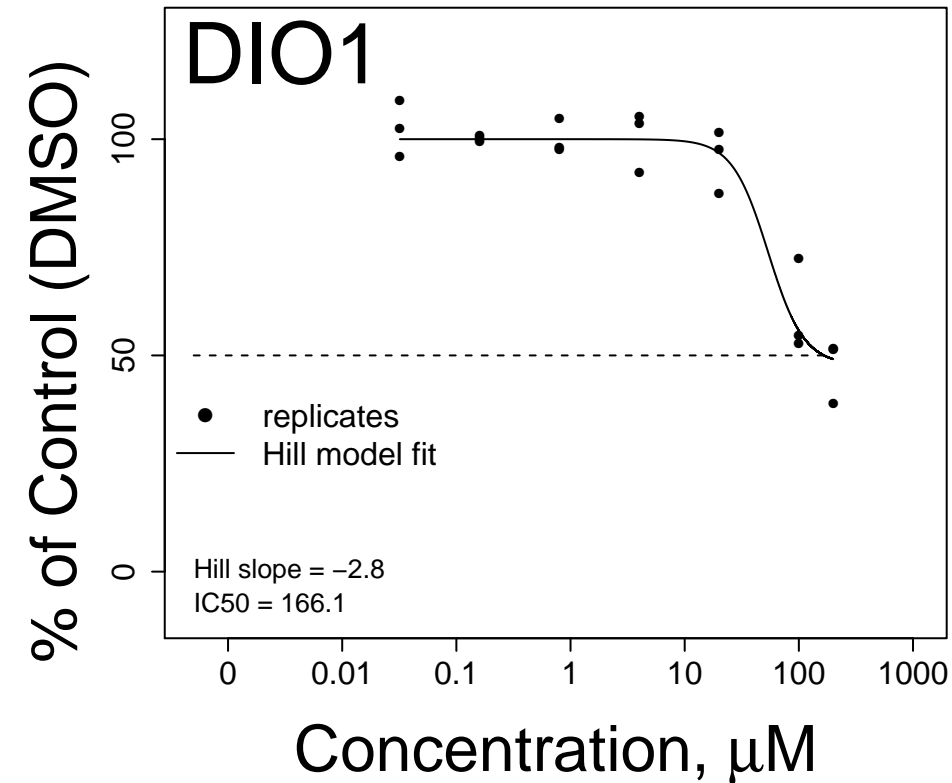



Thiram CASRN: 137-26-8

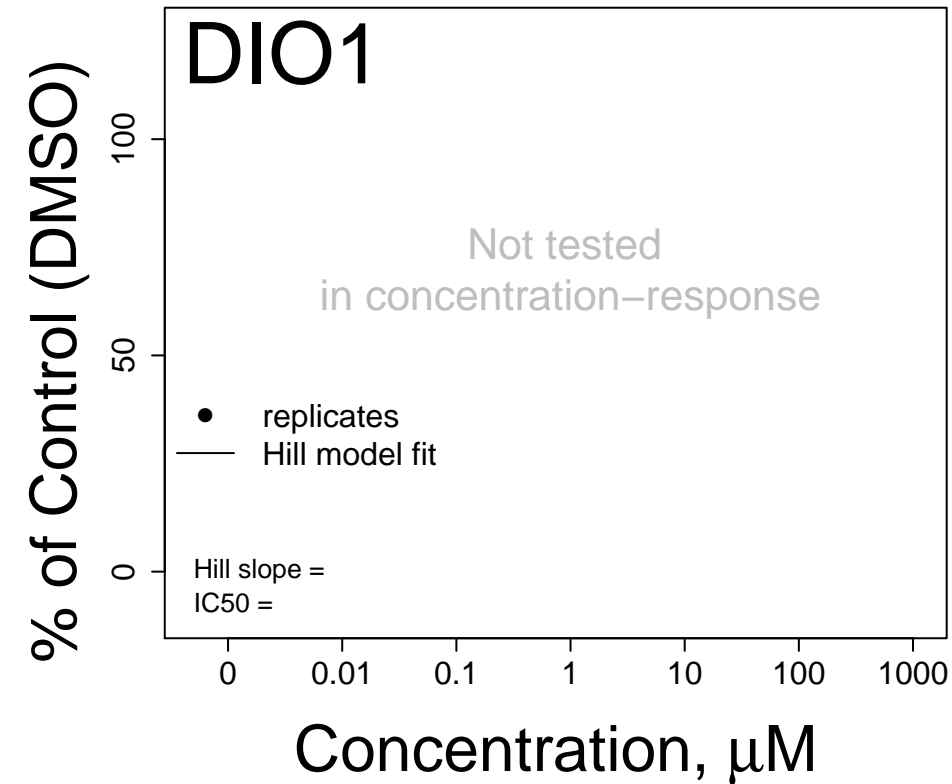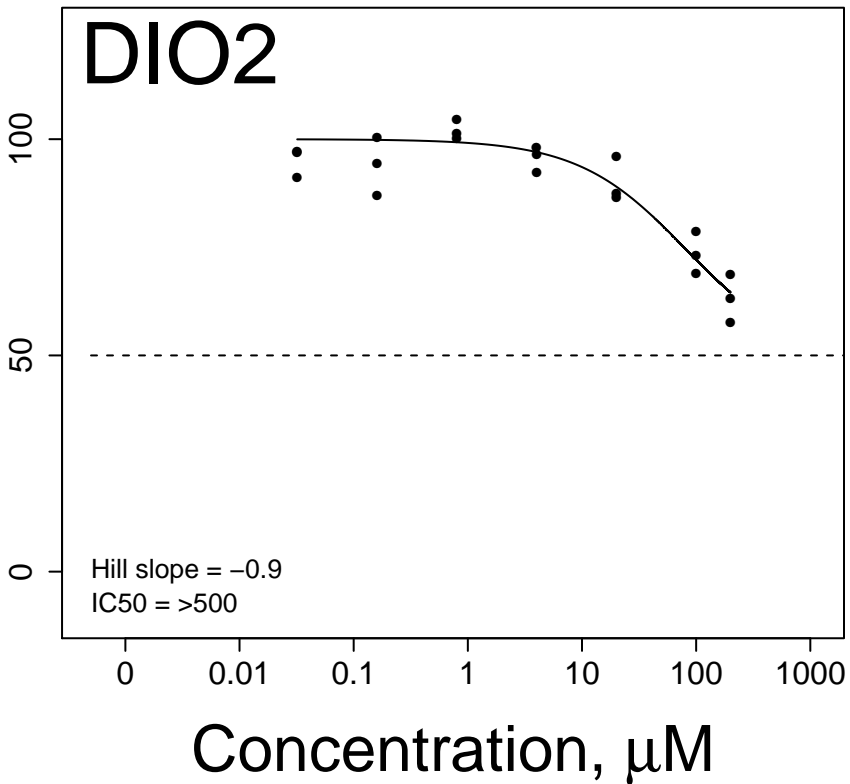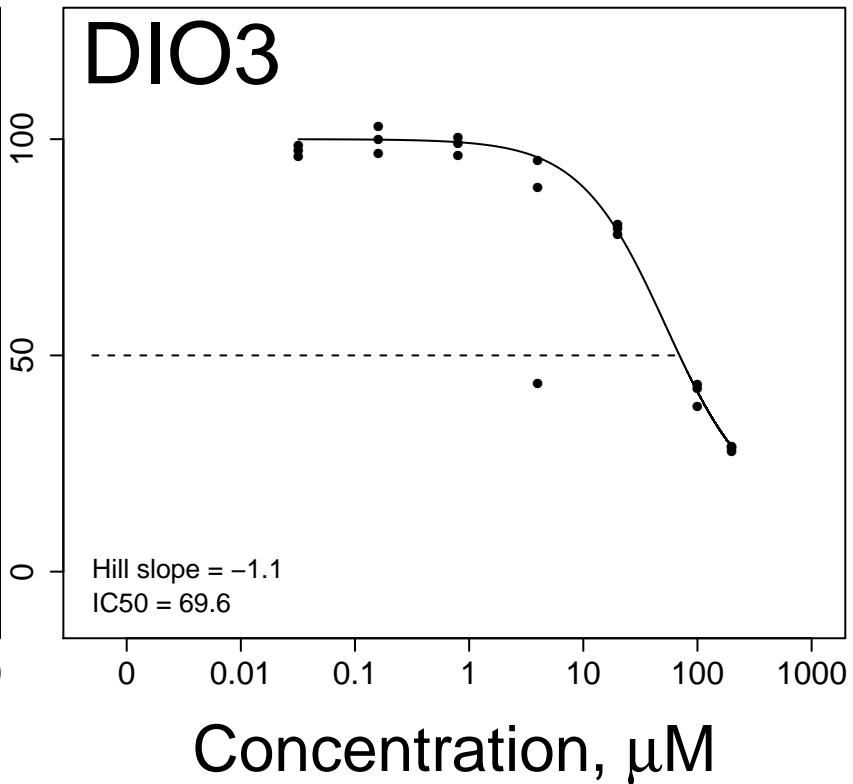

# Diclofulam CASRN: 145701-21-9

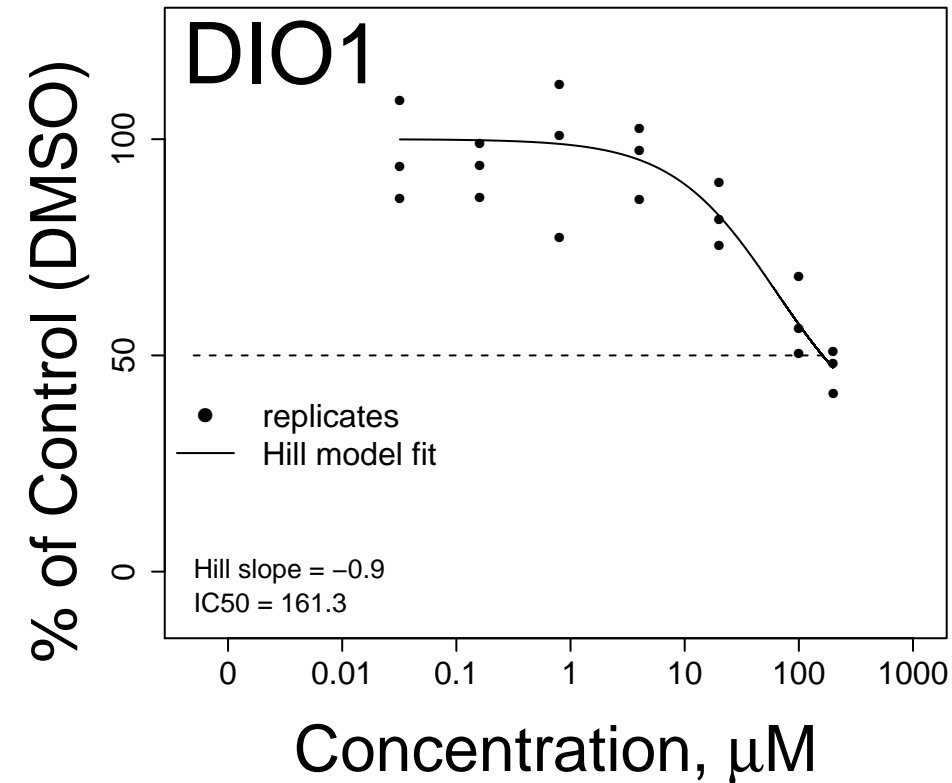

Emamectin benzoate CASRN: 155569-91-8

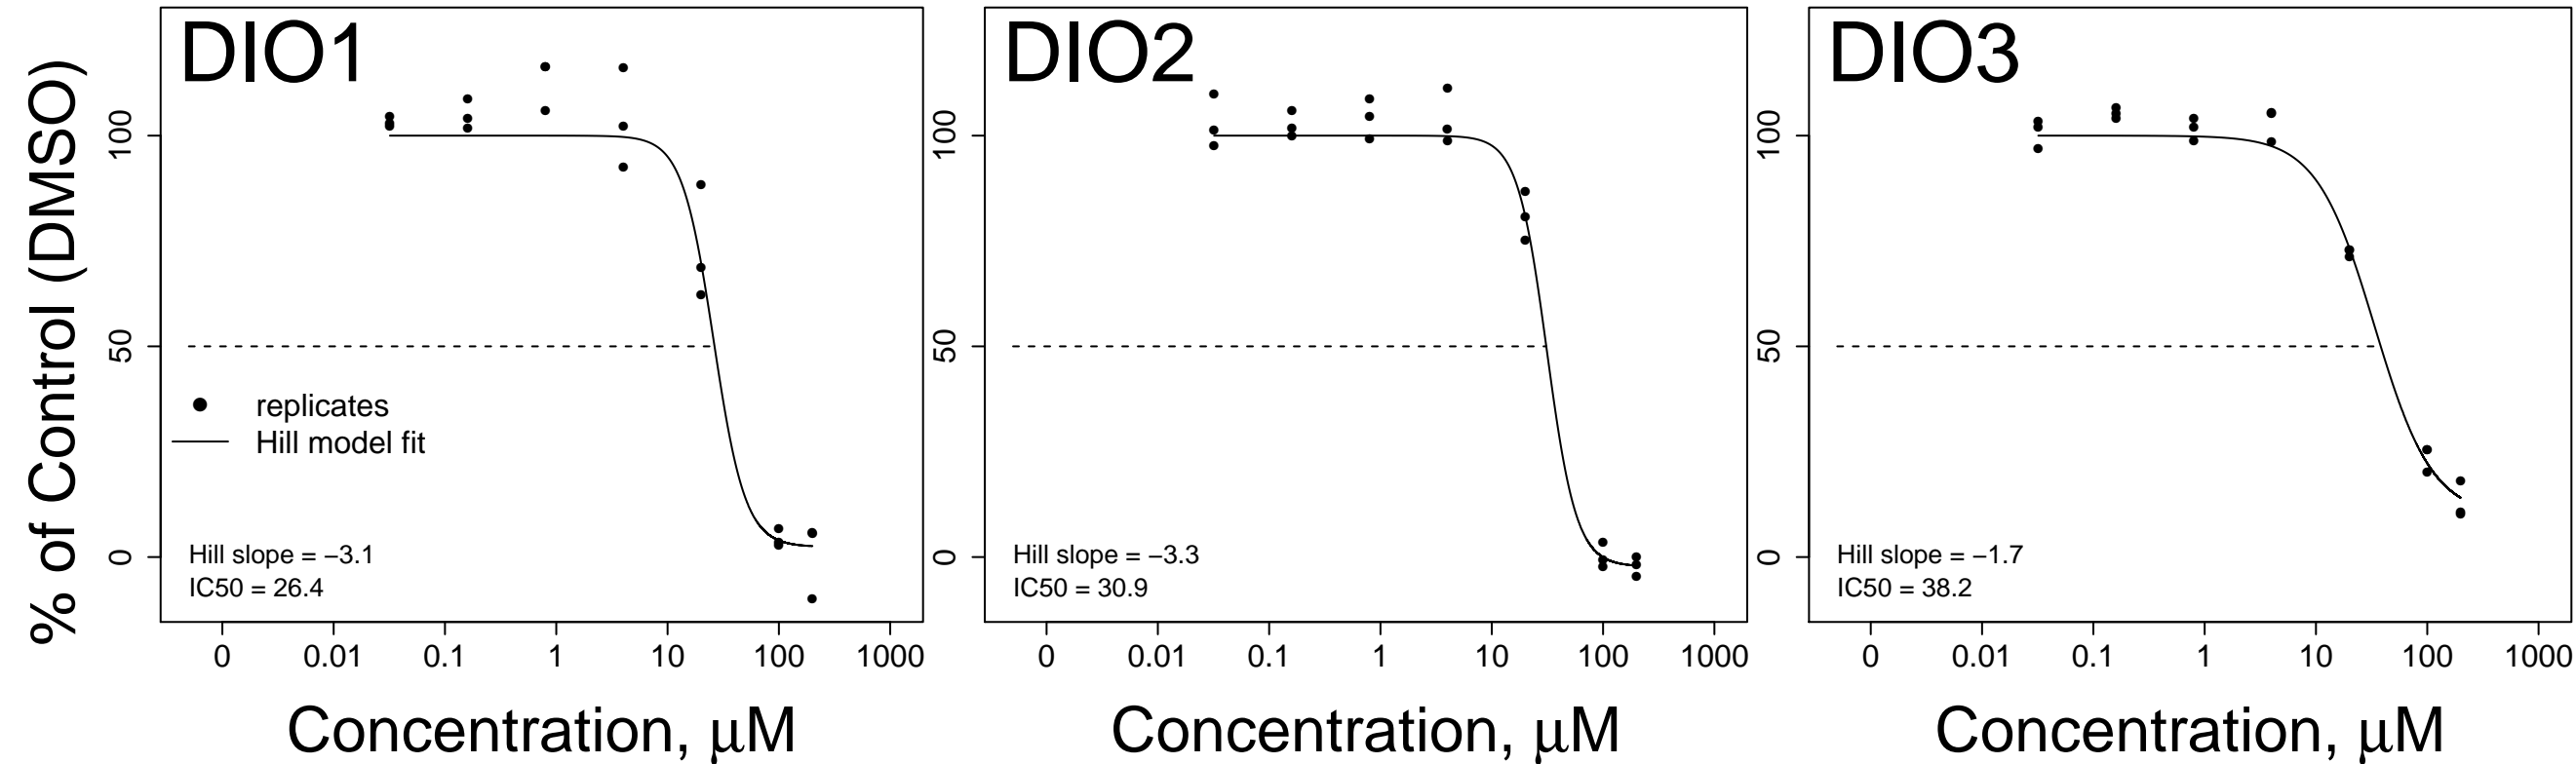

# Zoxamide CASRN: 156052-68-5

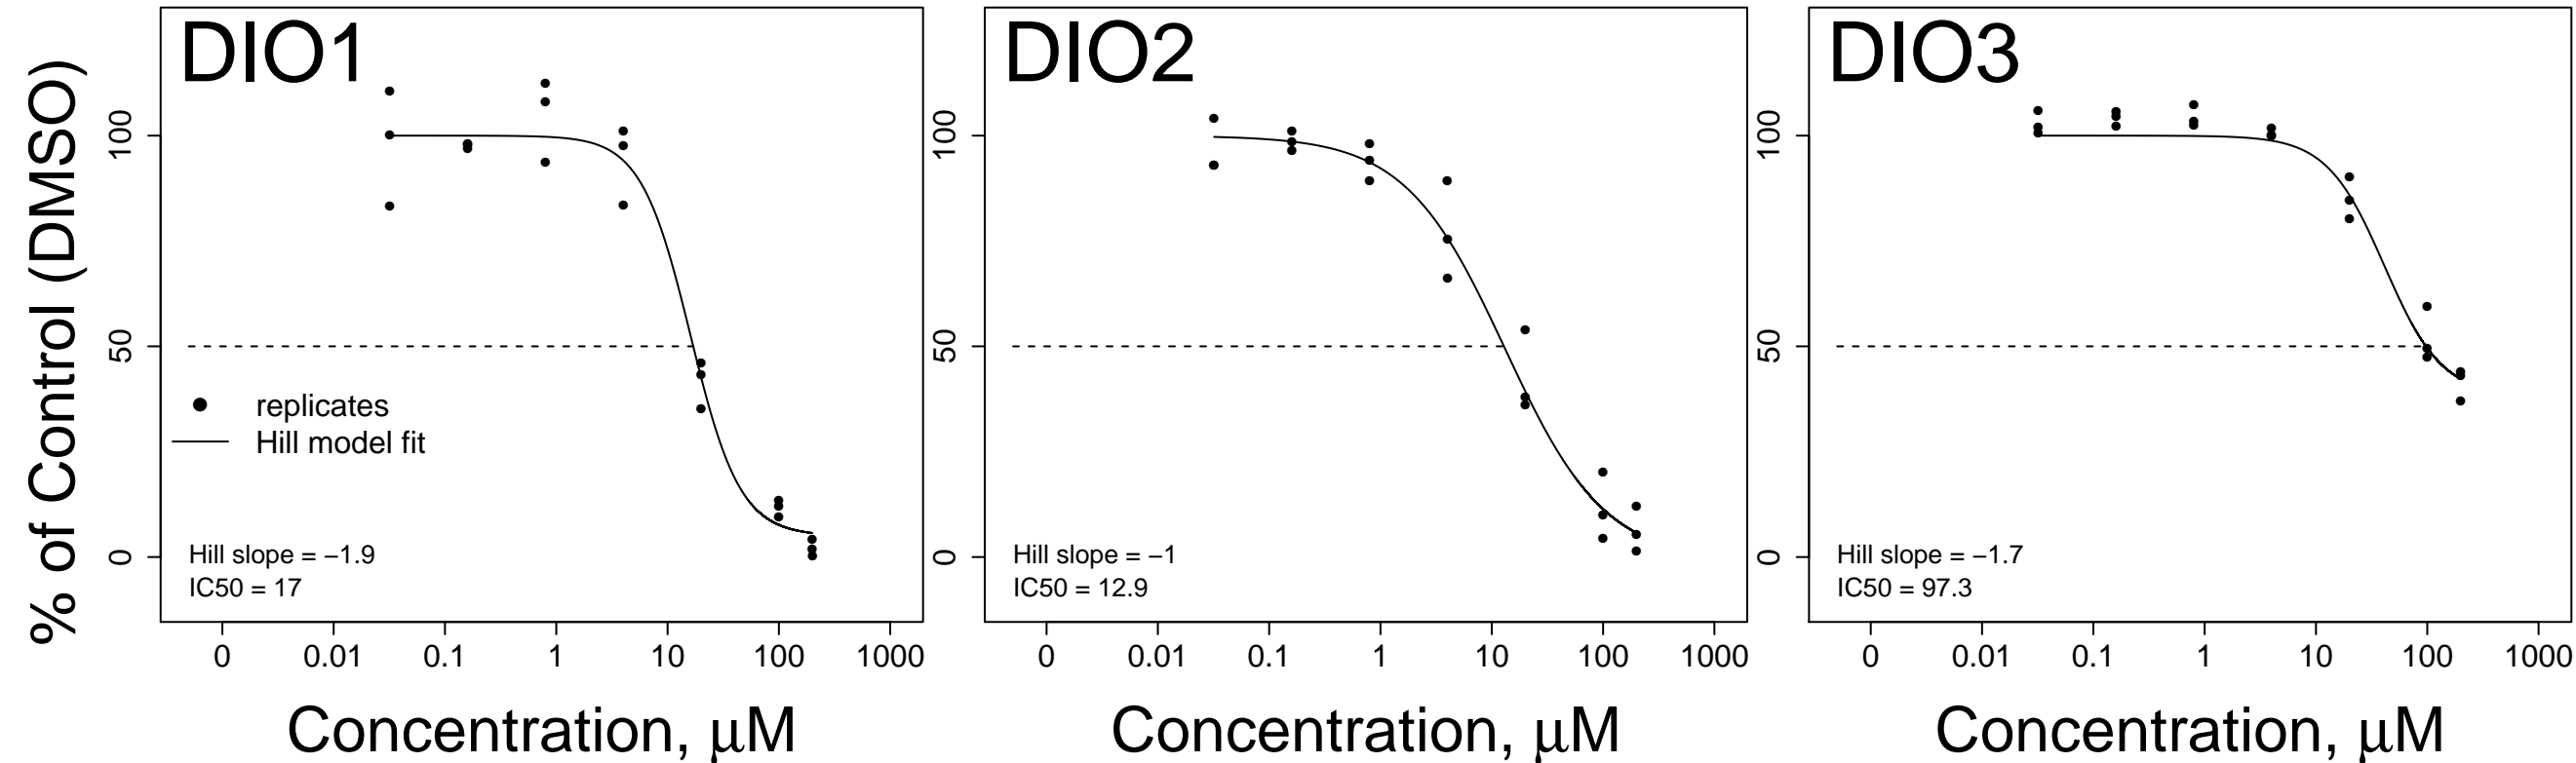

Alachlor CASRN: 15972-60-8

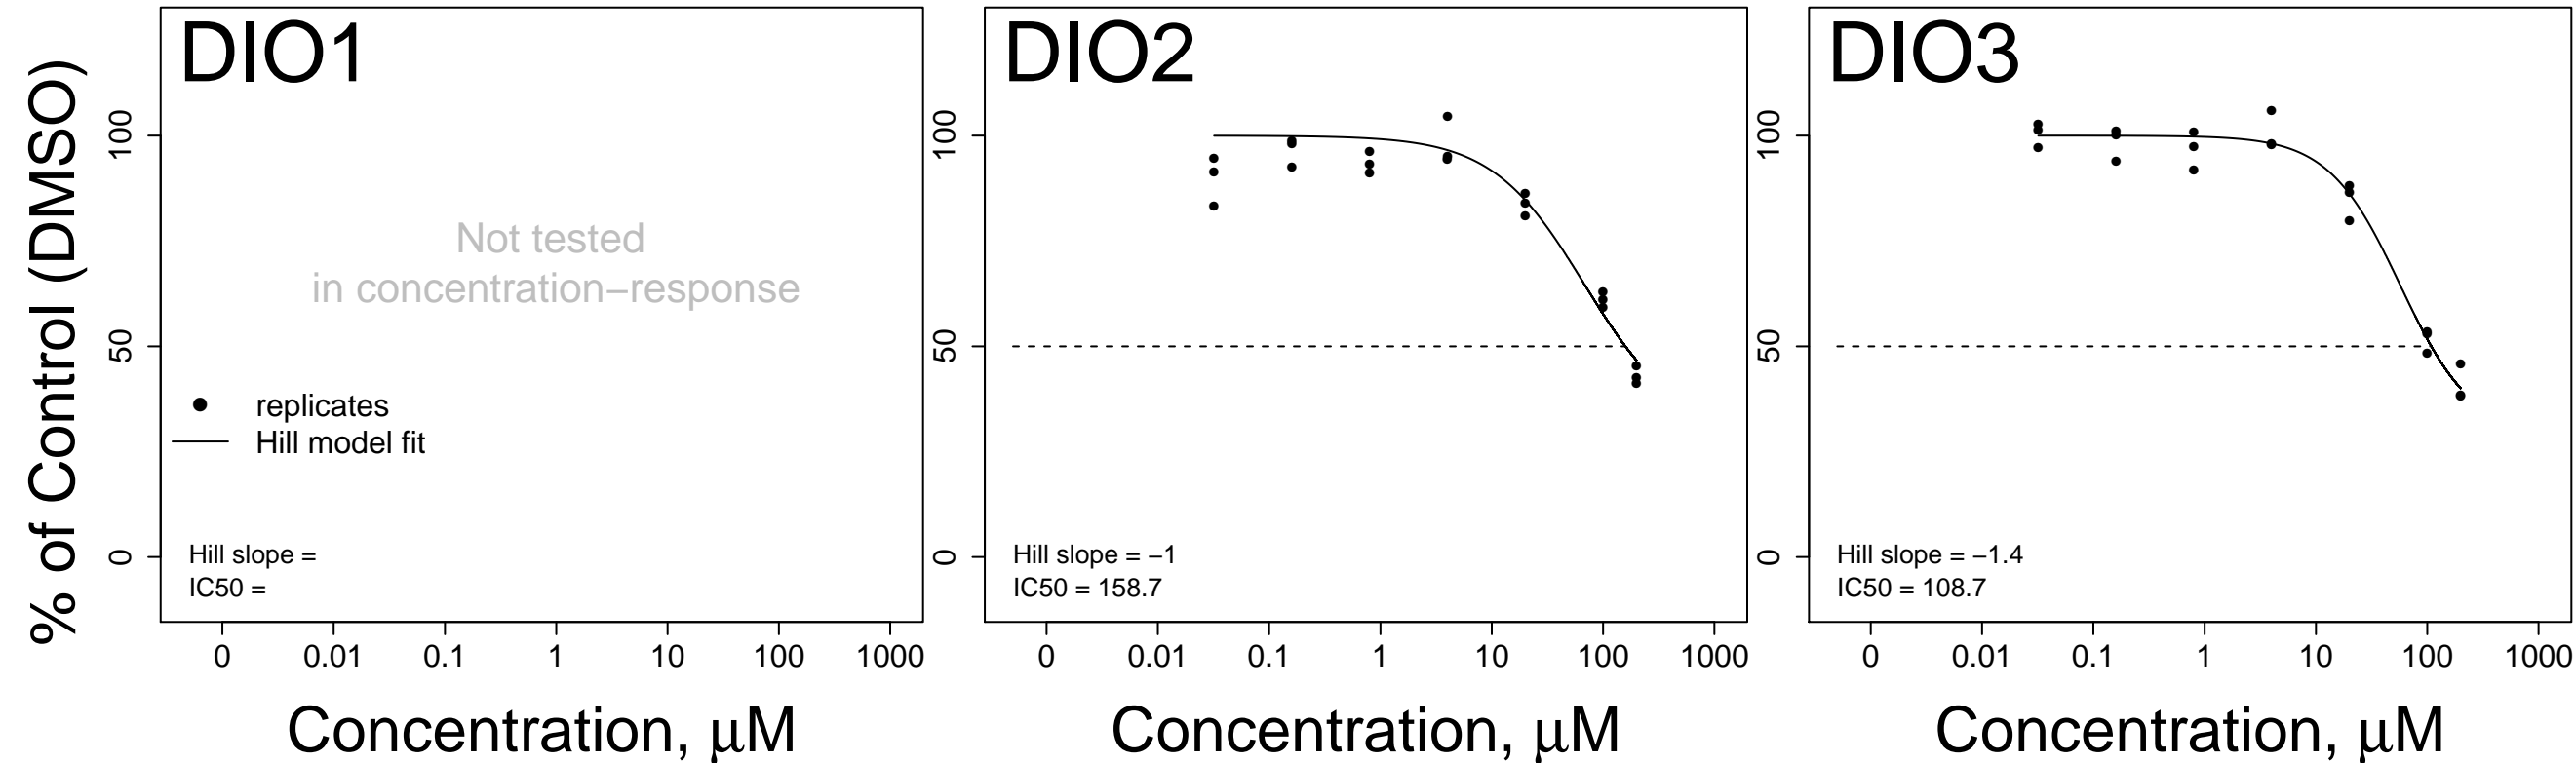

Malaoxon CASRN: 1634-78-2

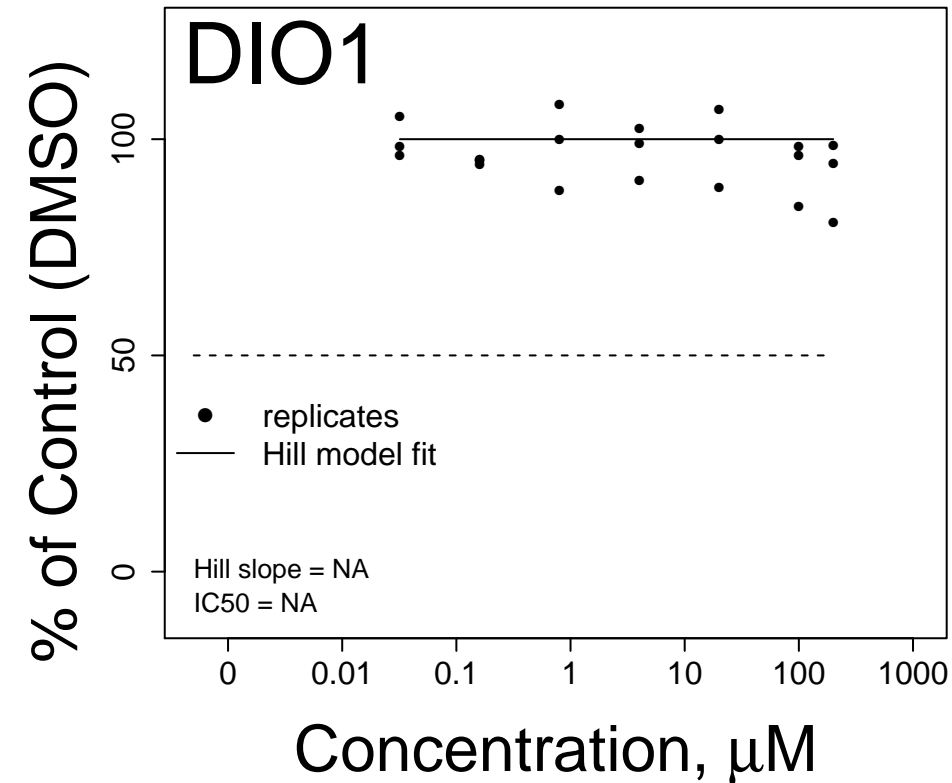

PFOS CASRN: 1763-23-1

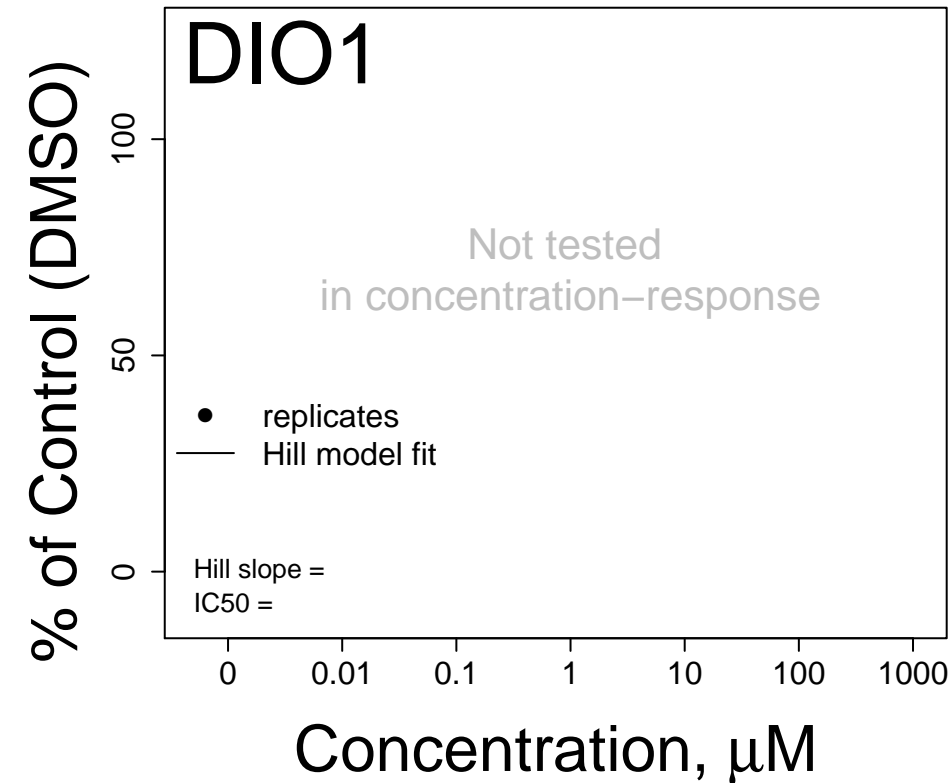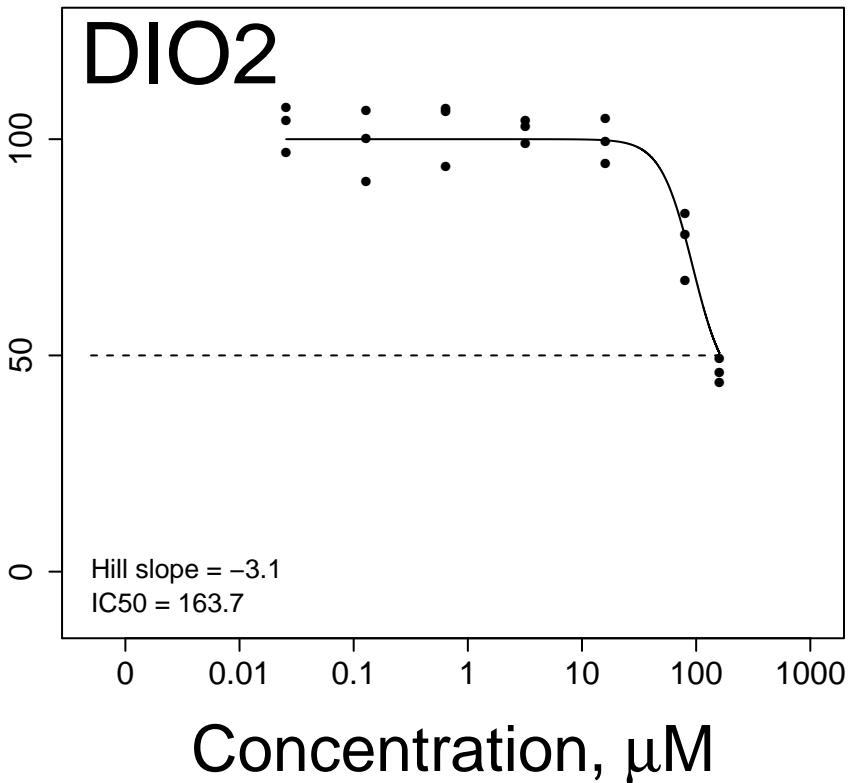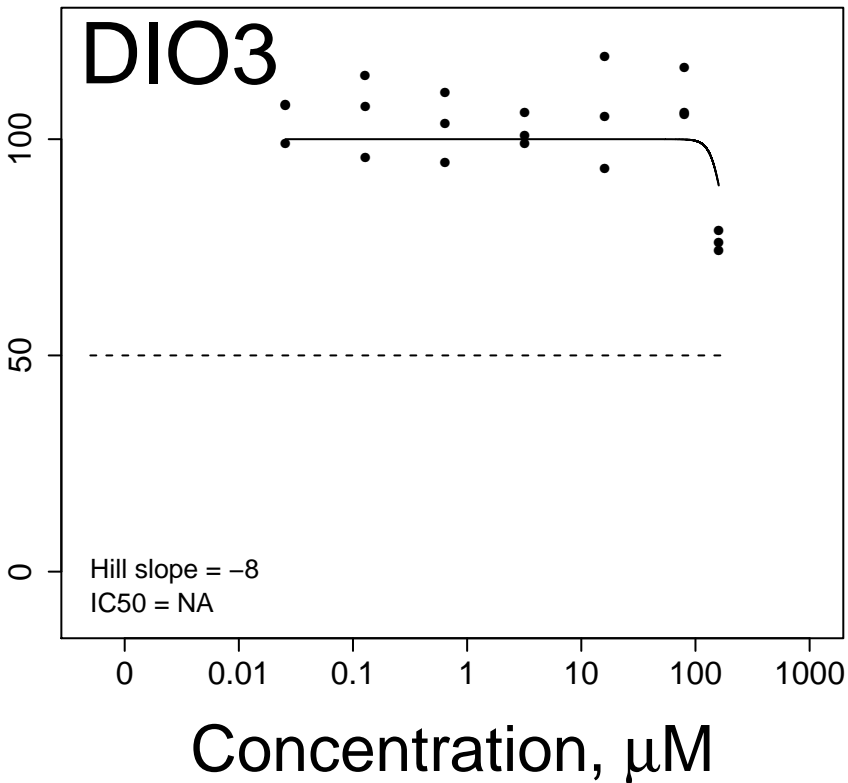

# Chlorothalonil CASRN: 1897-45-6

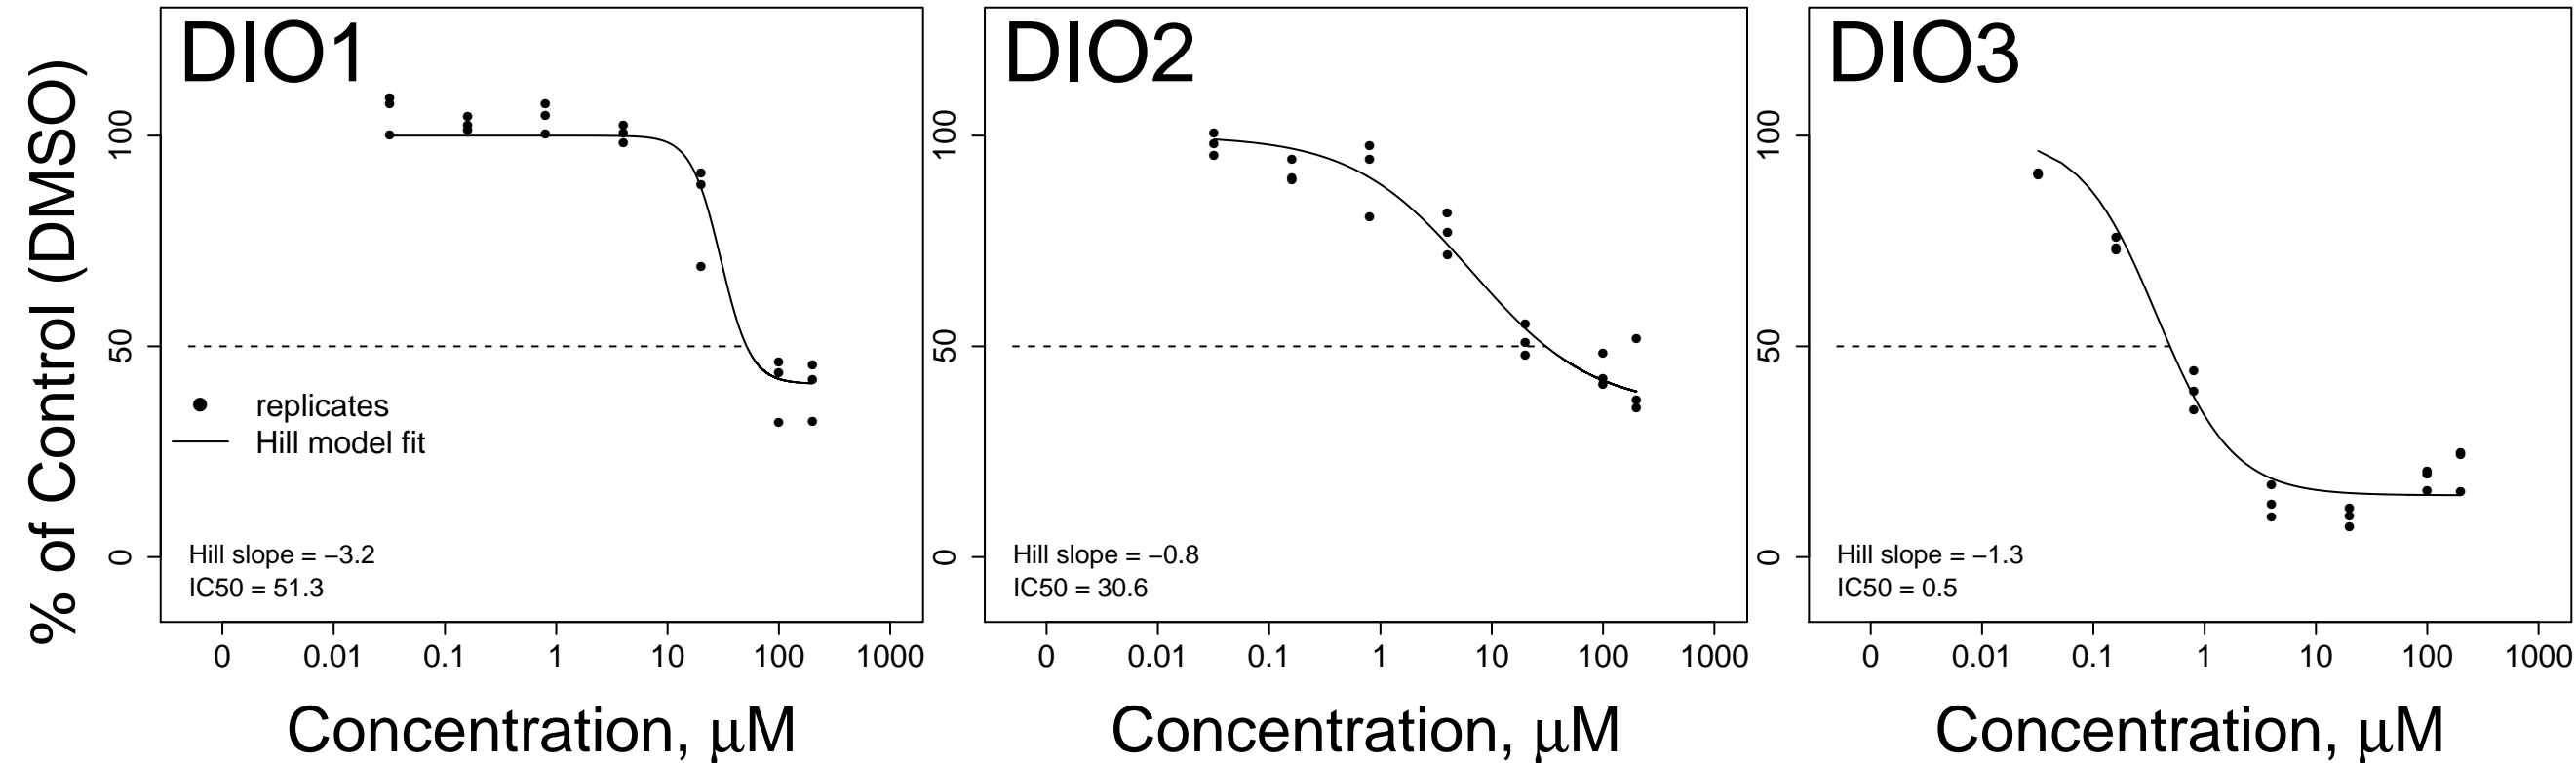



# Oryzalin CASRN: 19044-88-3

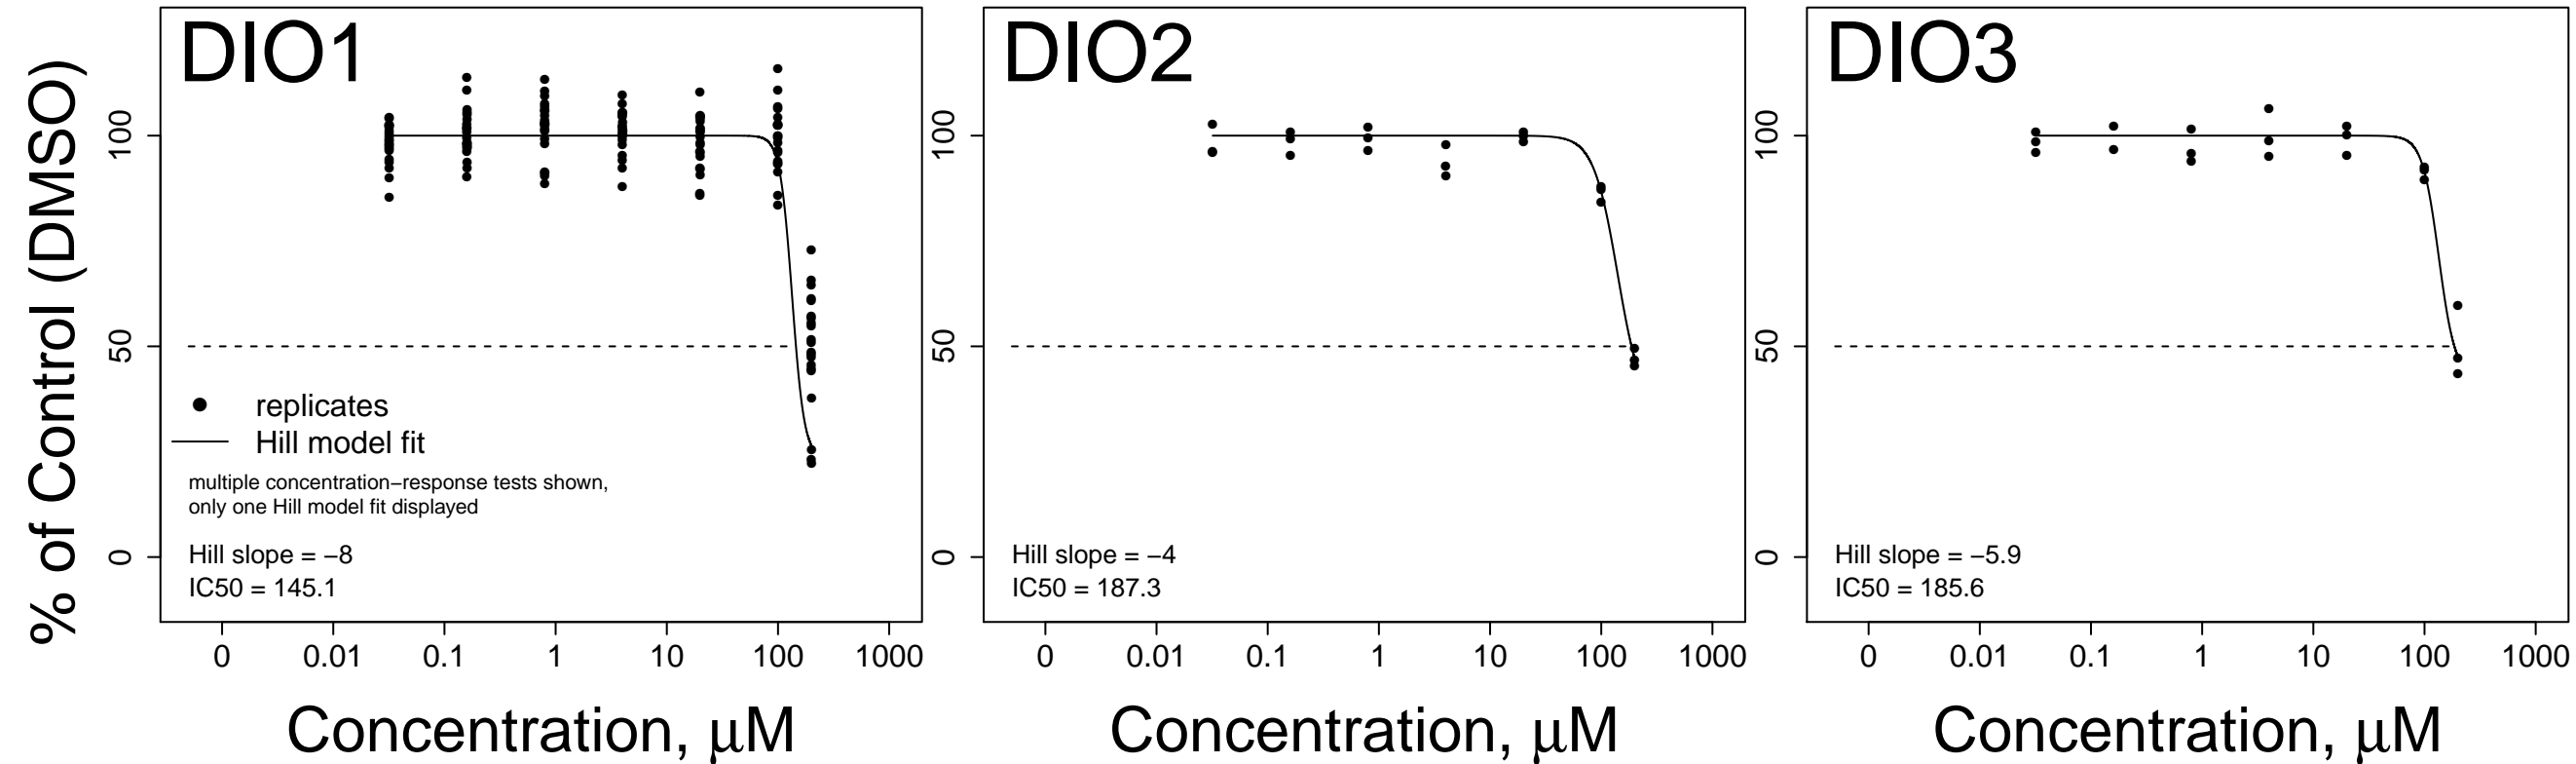

Atrazine CASRN: 1912-24-9

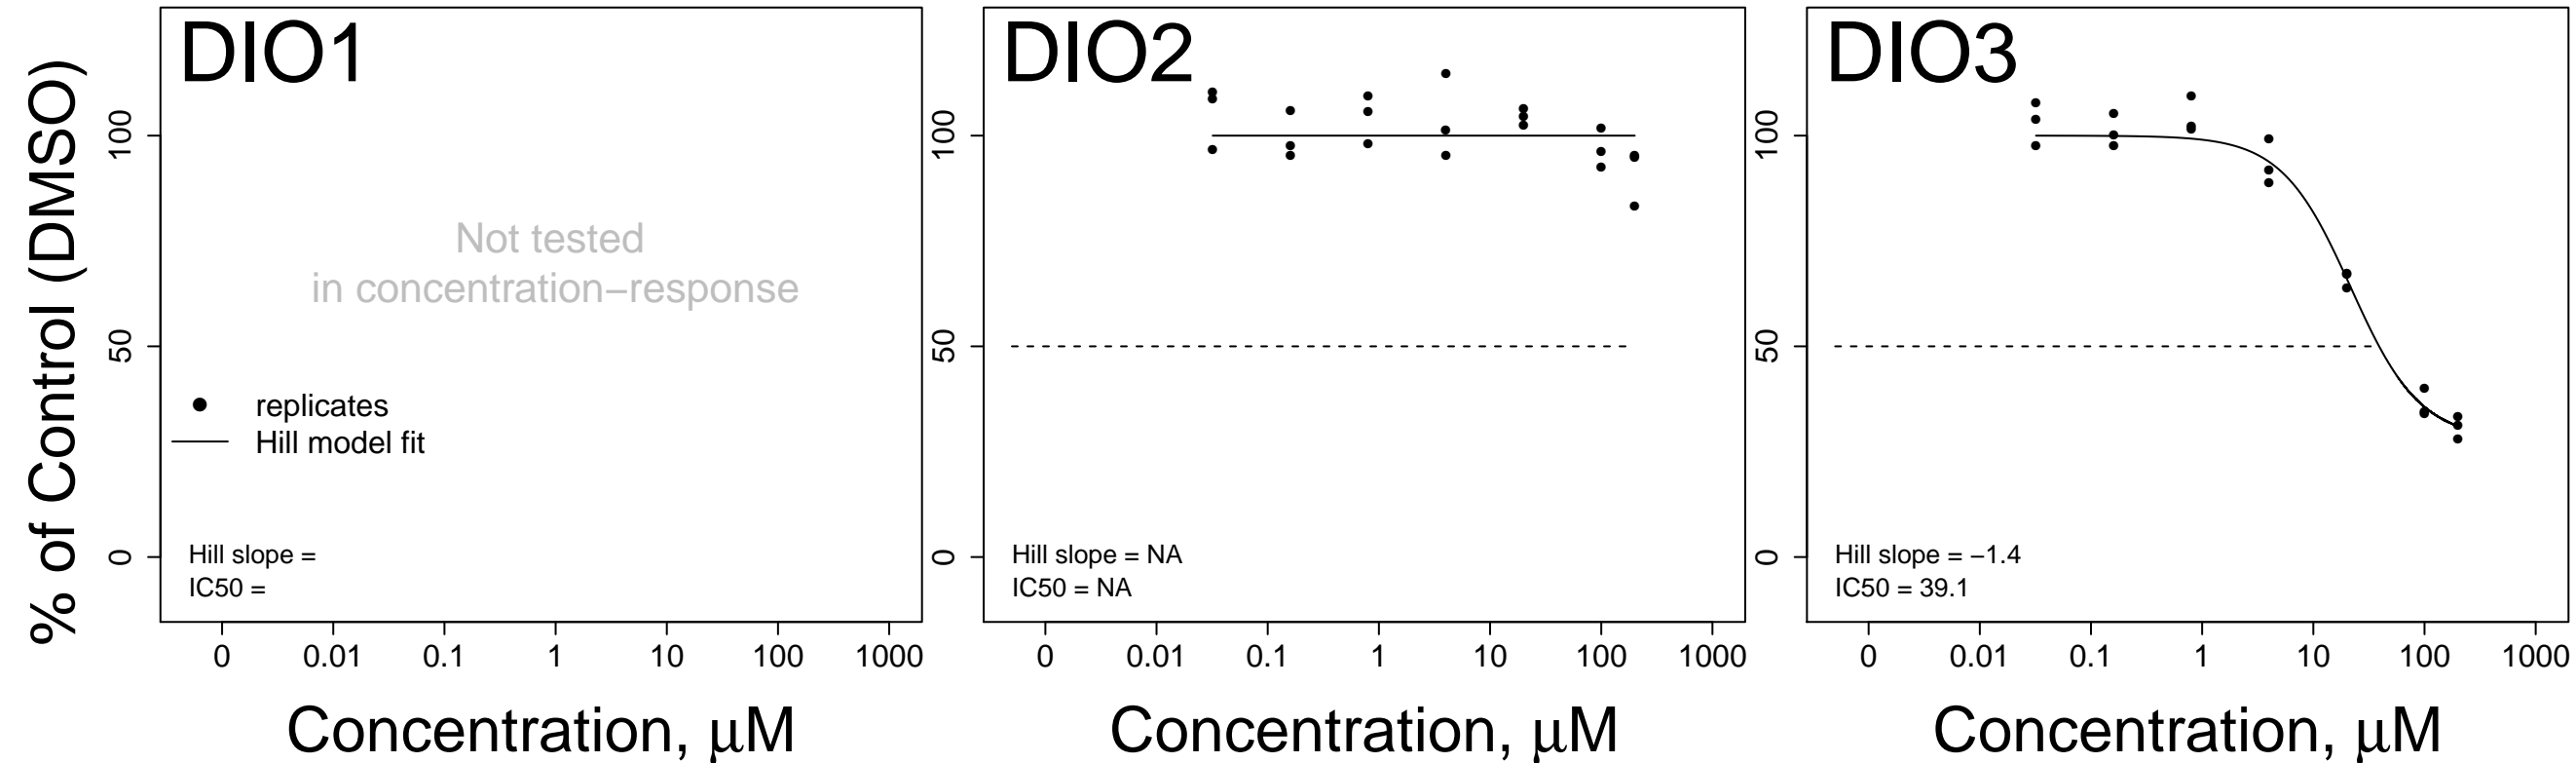

# Cyanazine CASRN: 21725-46-2

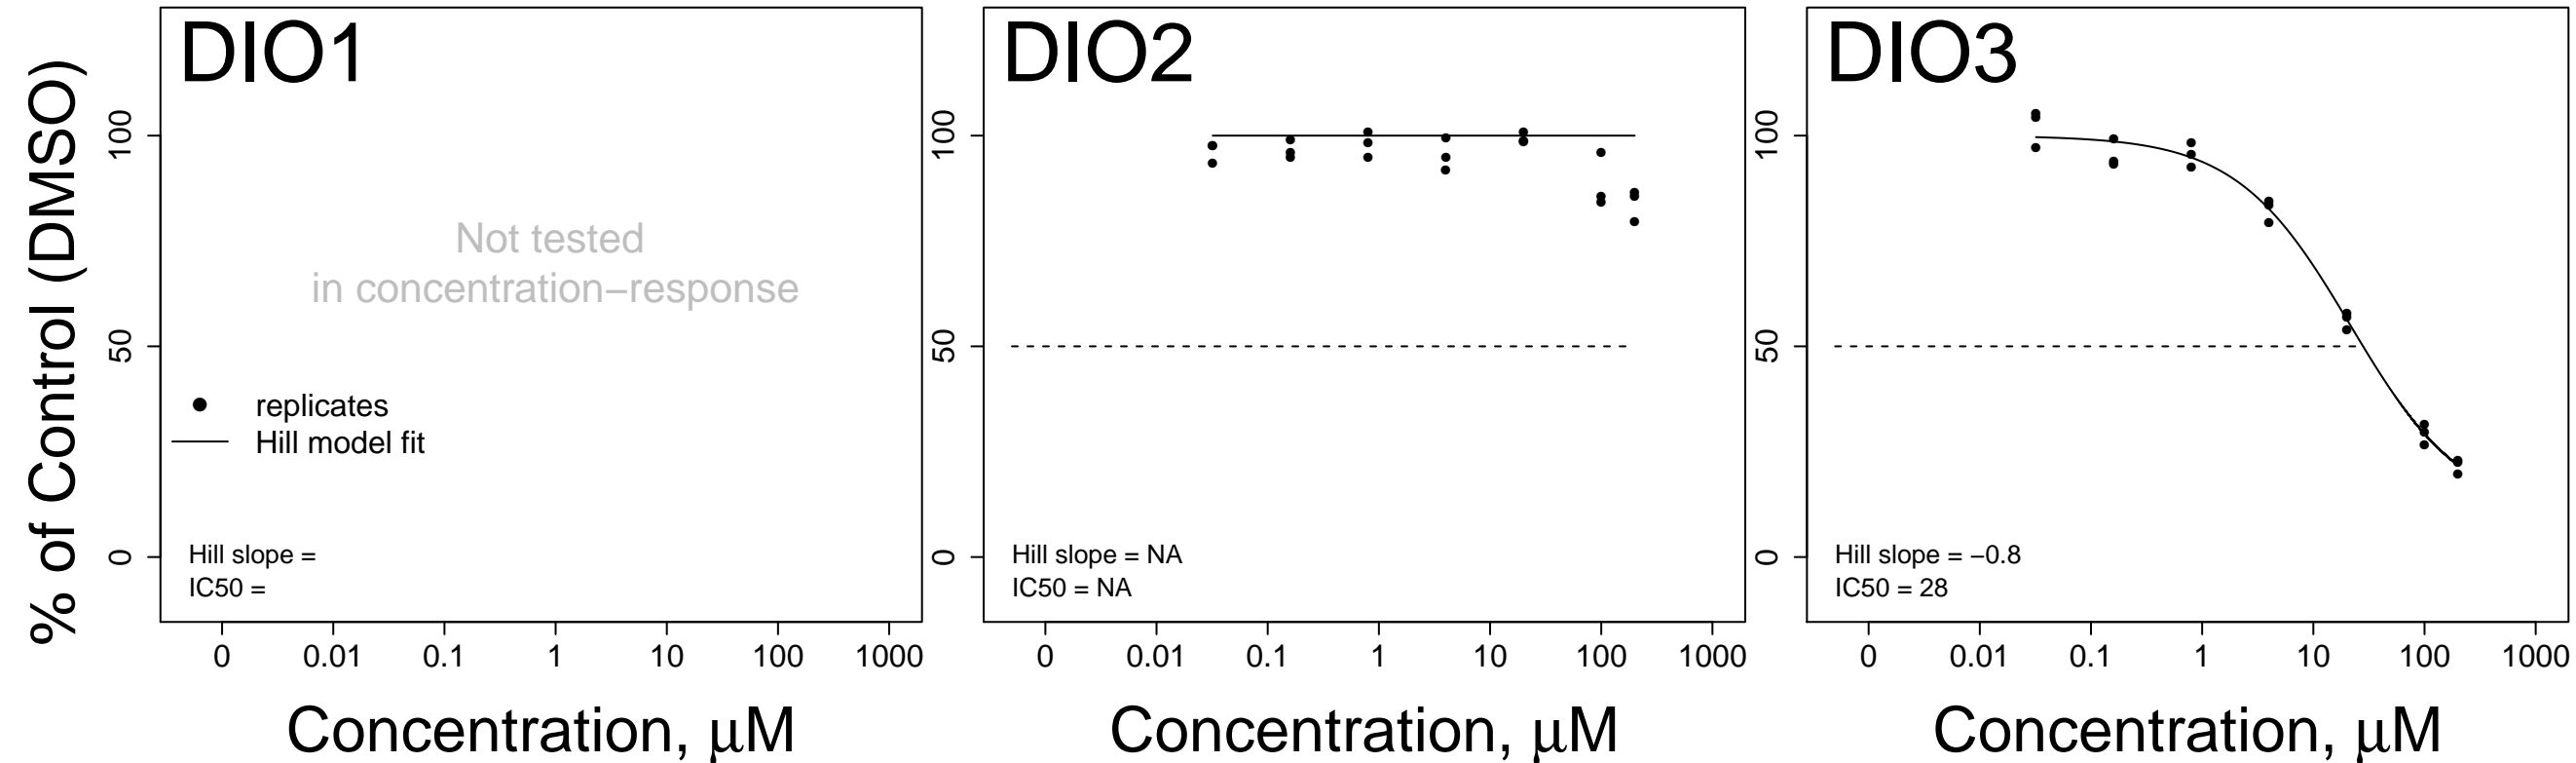

Prallethrin CASRN: 23031-36-9

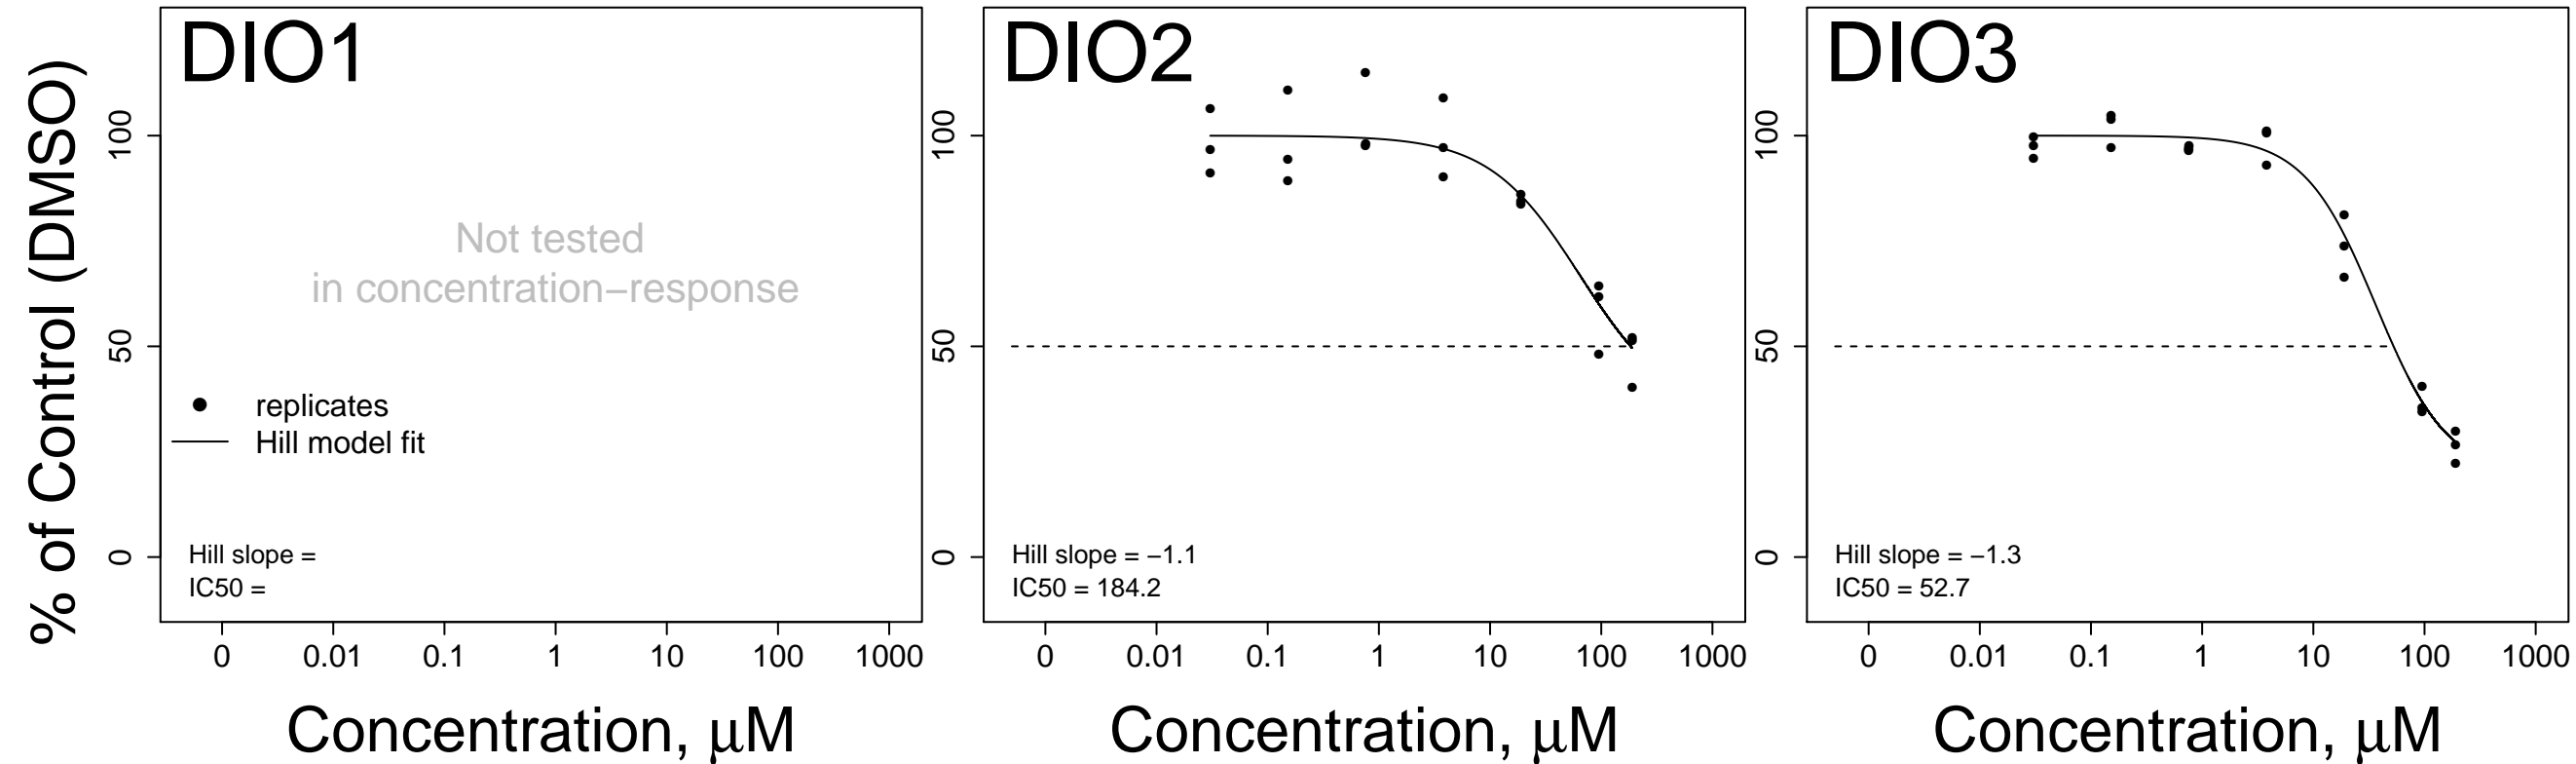

Pirimicarb CASRN: 23103-98-2

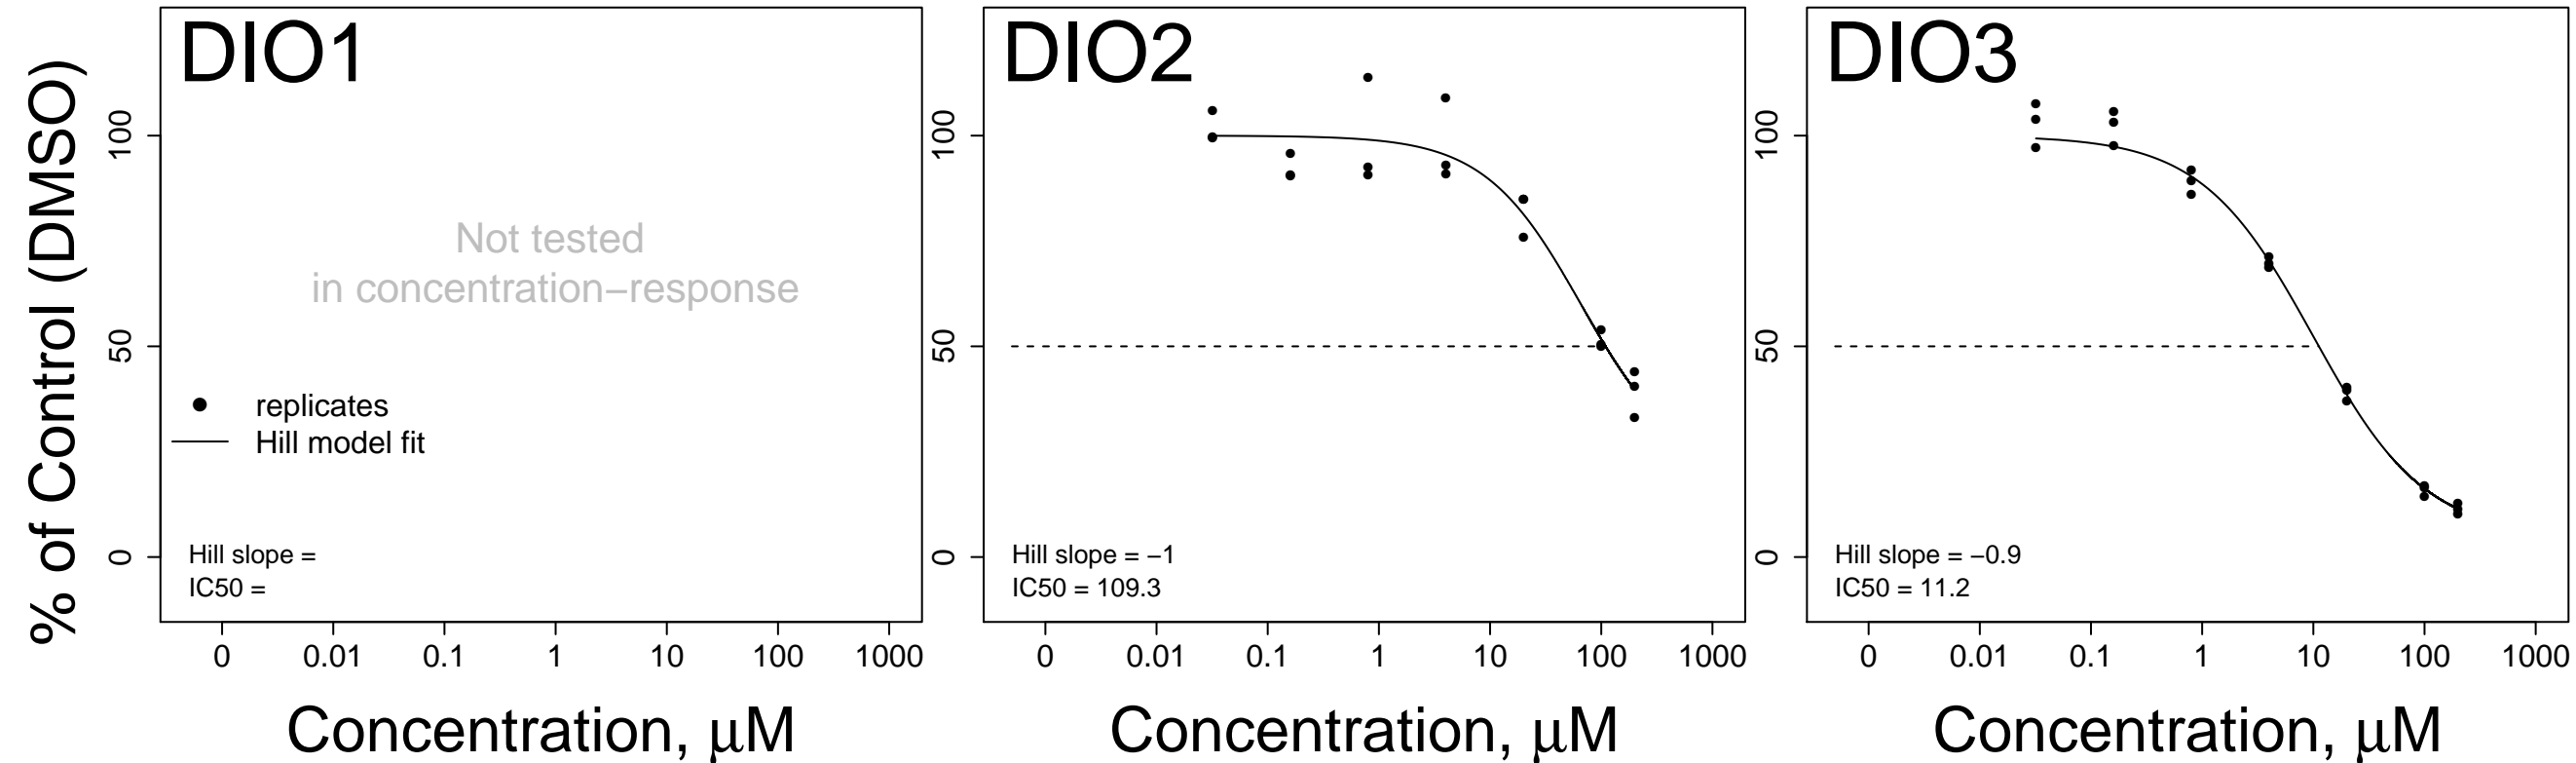

# Butachlor CASRN: 23184-66-9

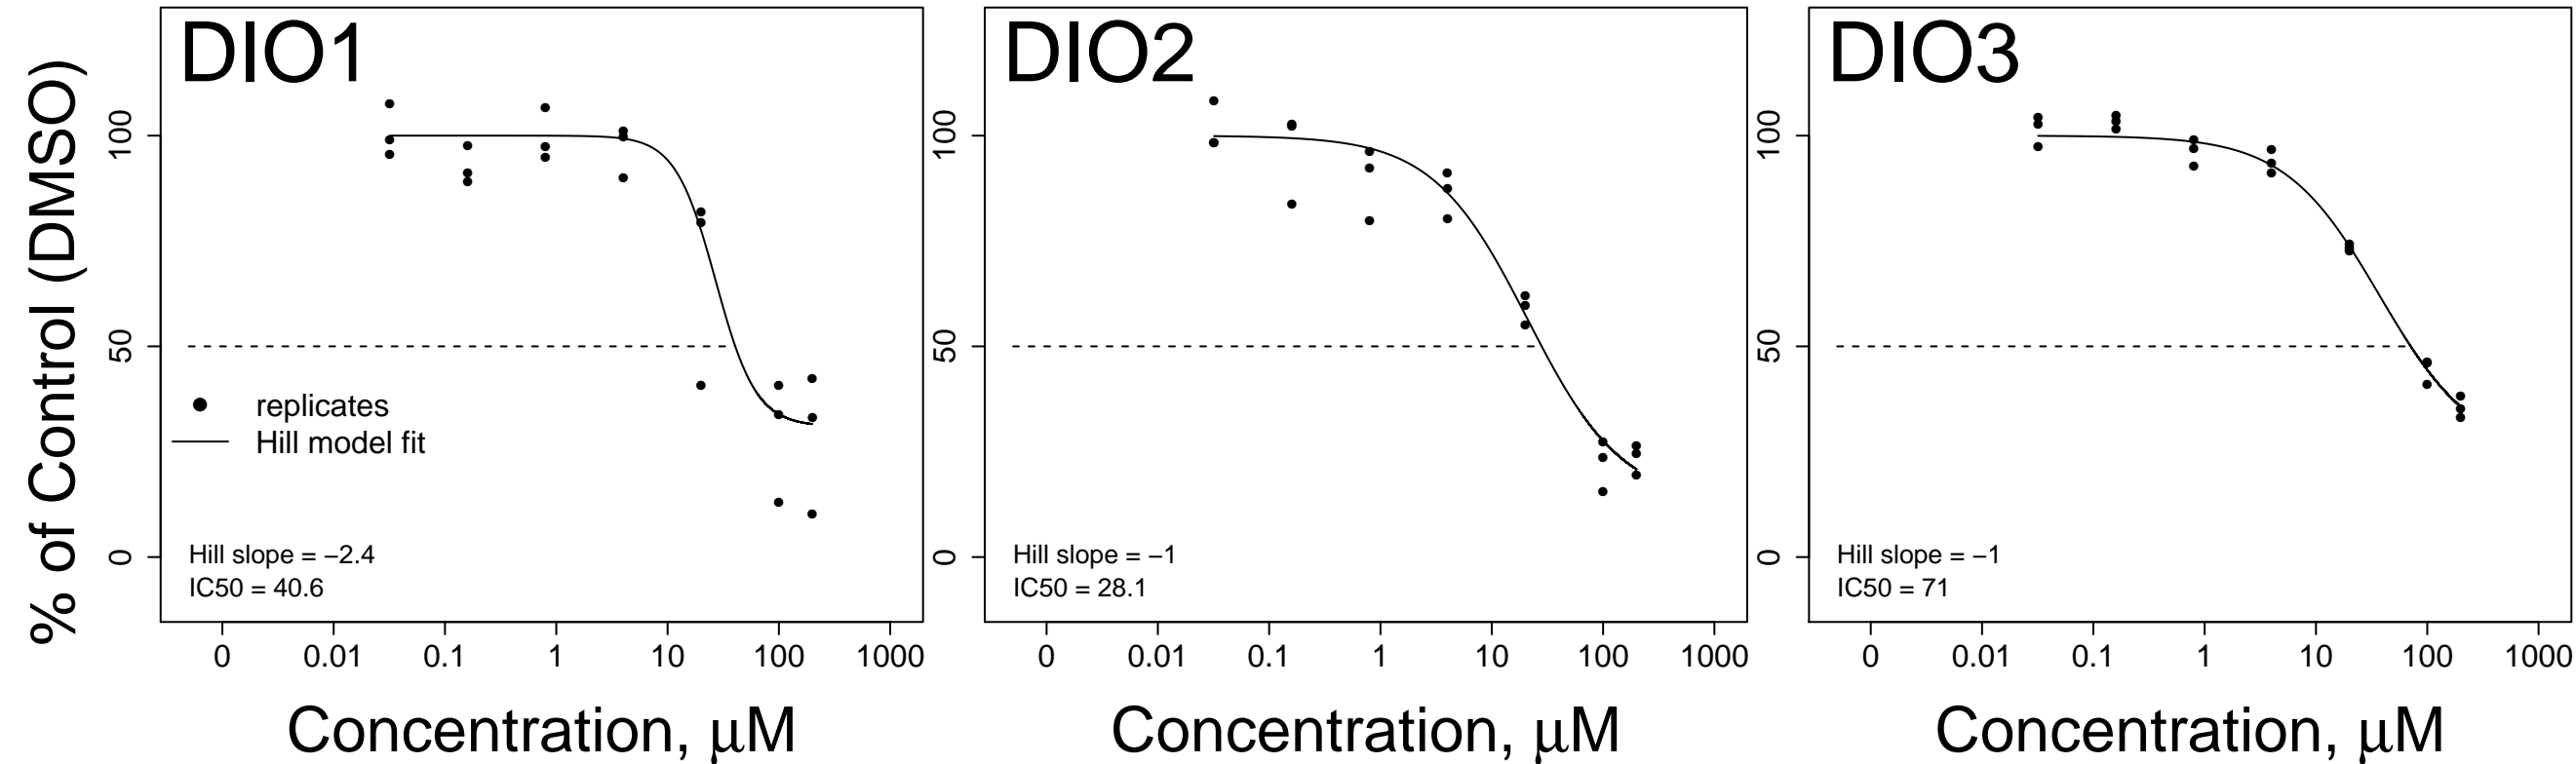

# Captafol CASRN: 2425-06-1

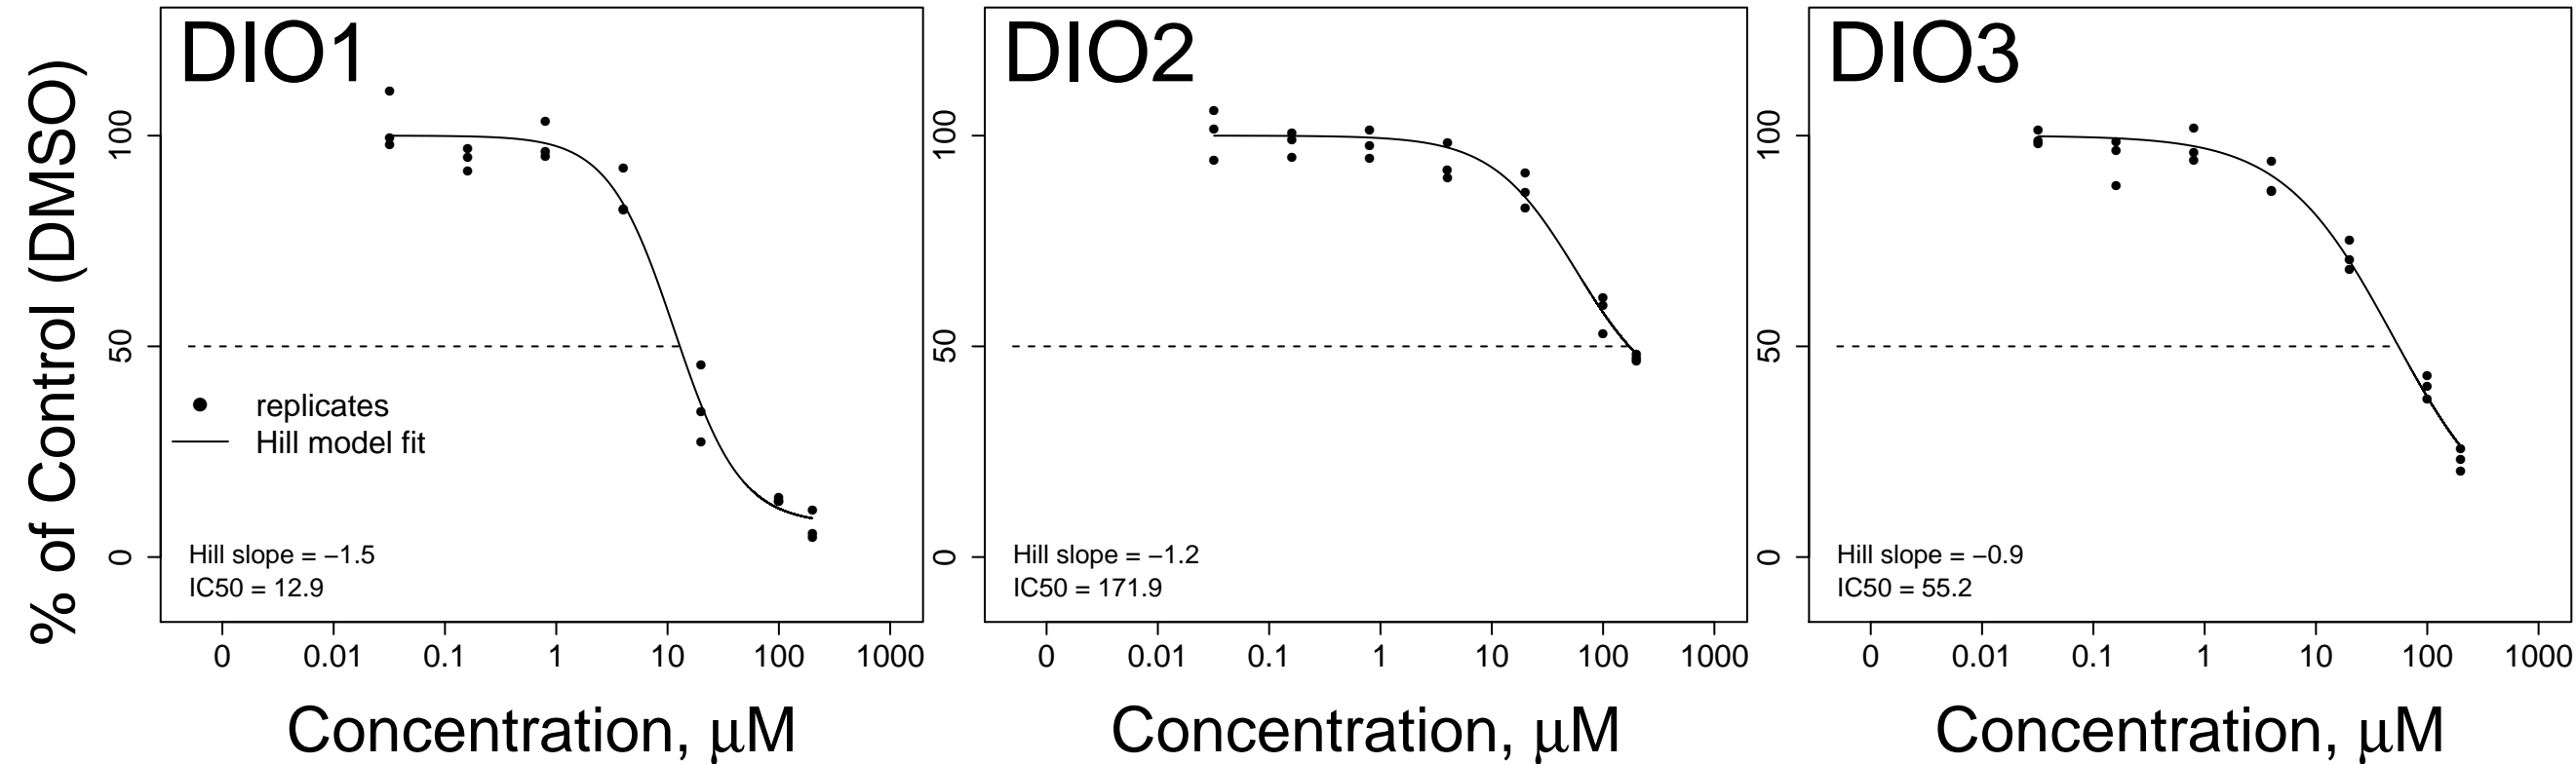

Prodiamine CASRN: 29091-21-2

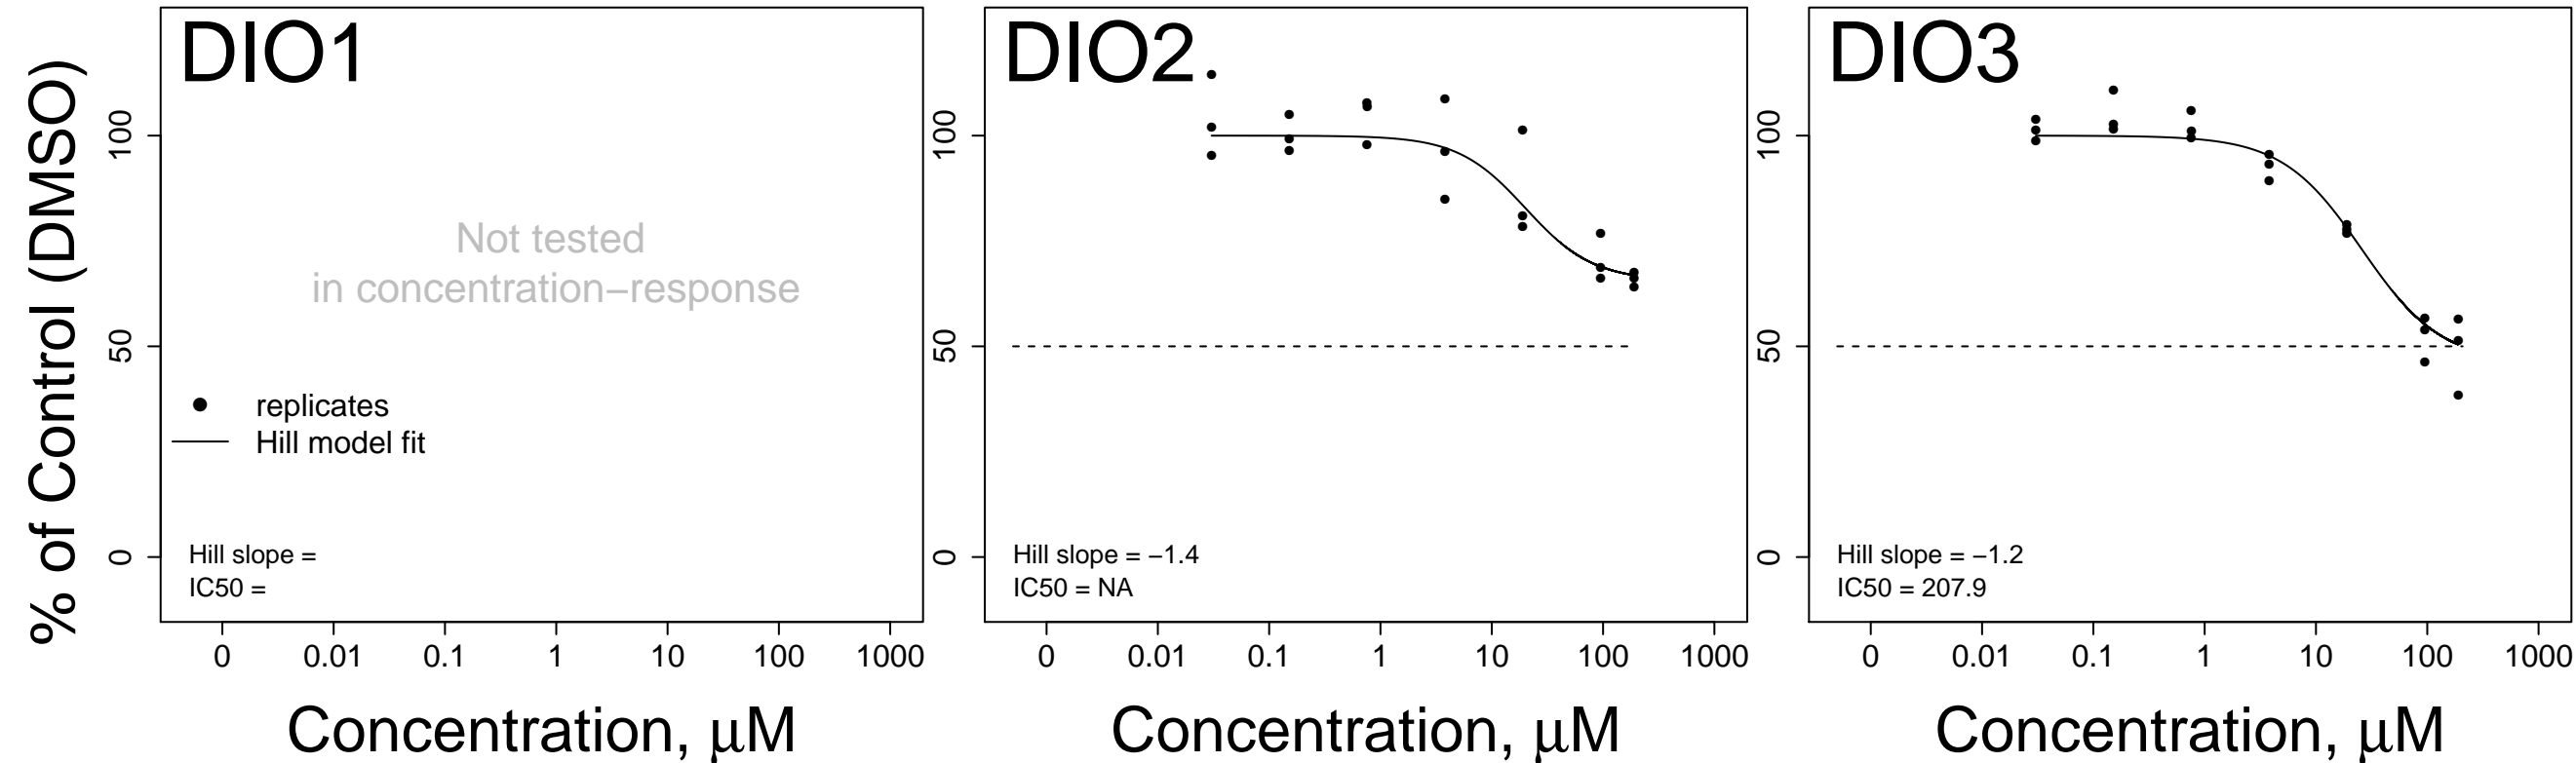



Pirimiphos-methyl CASRN: 29232-93-7

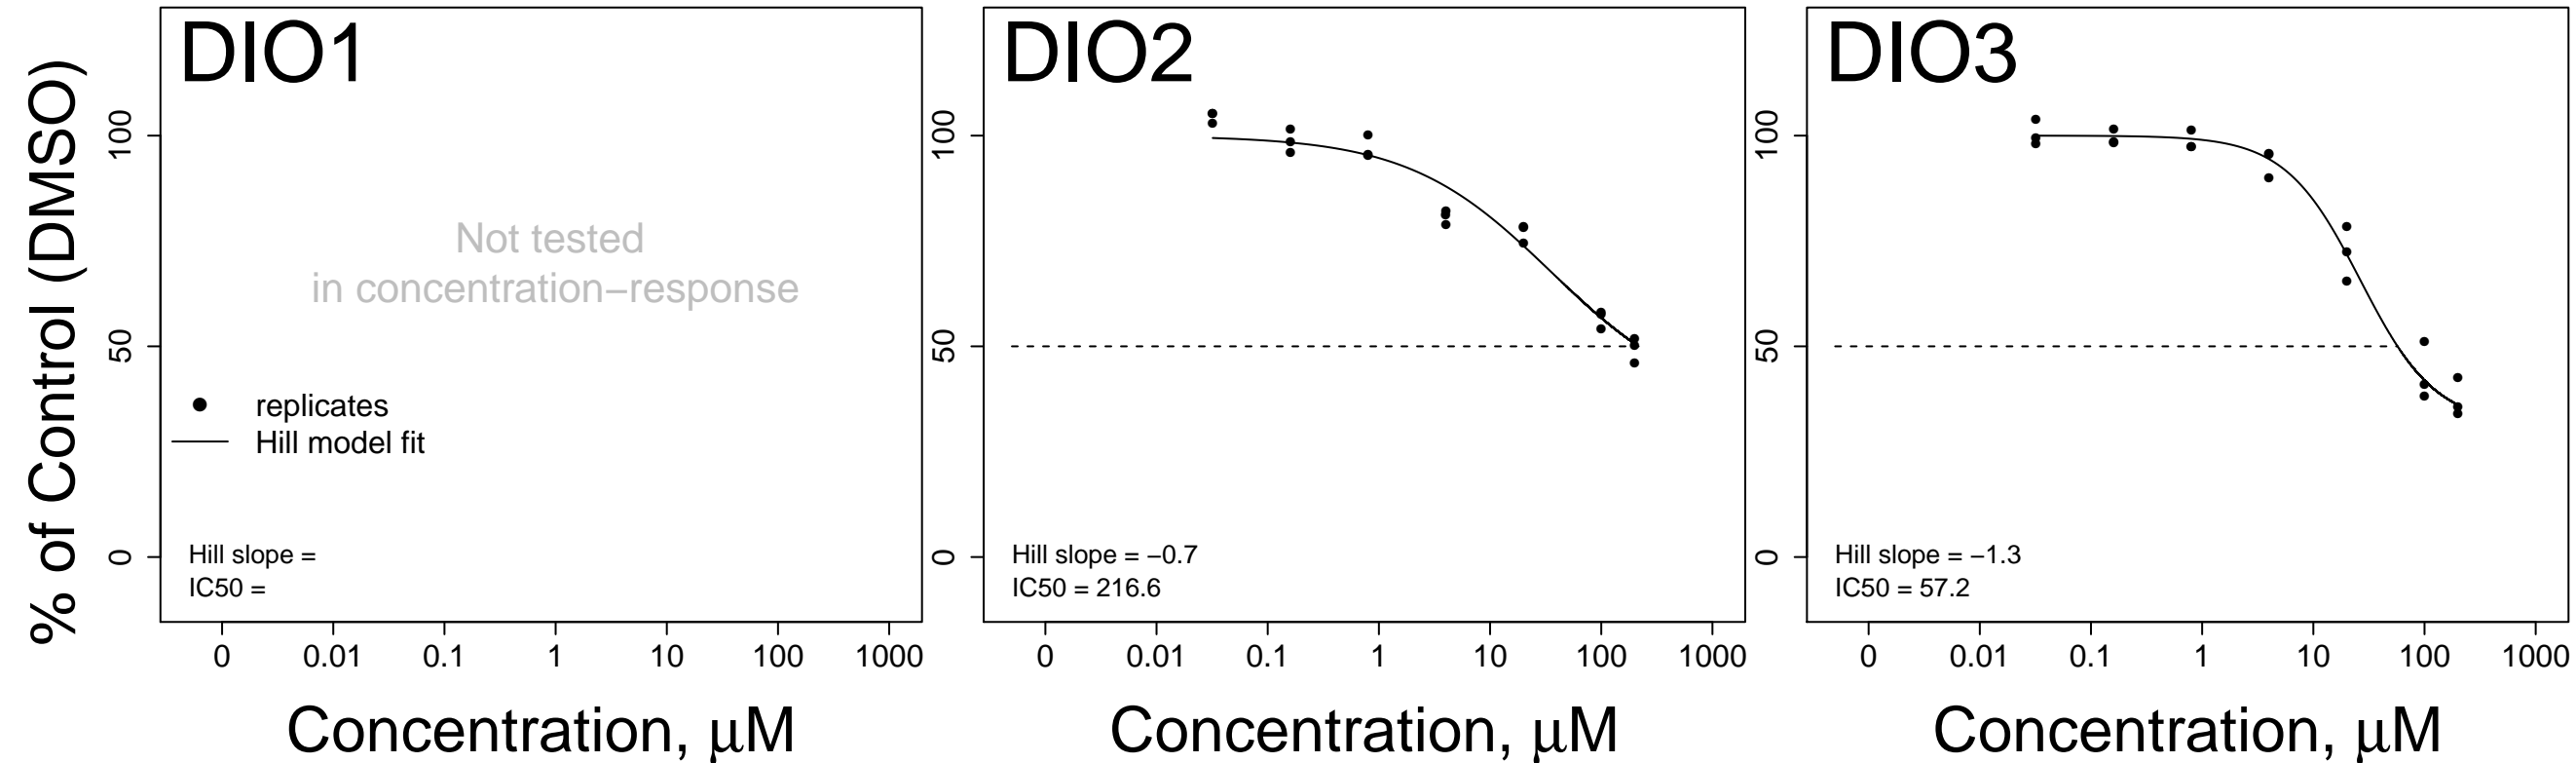

# 2,2-Bis(4-hydroxyphenyl)-1,1,1-trichloroethane

CASRN: 2971-36-0

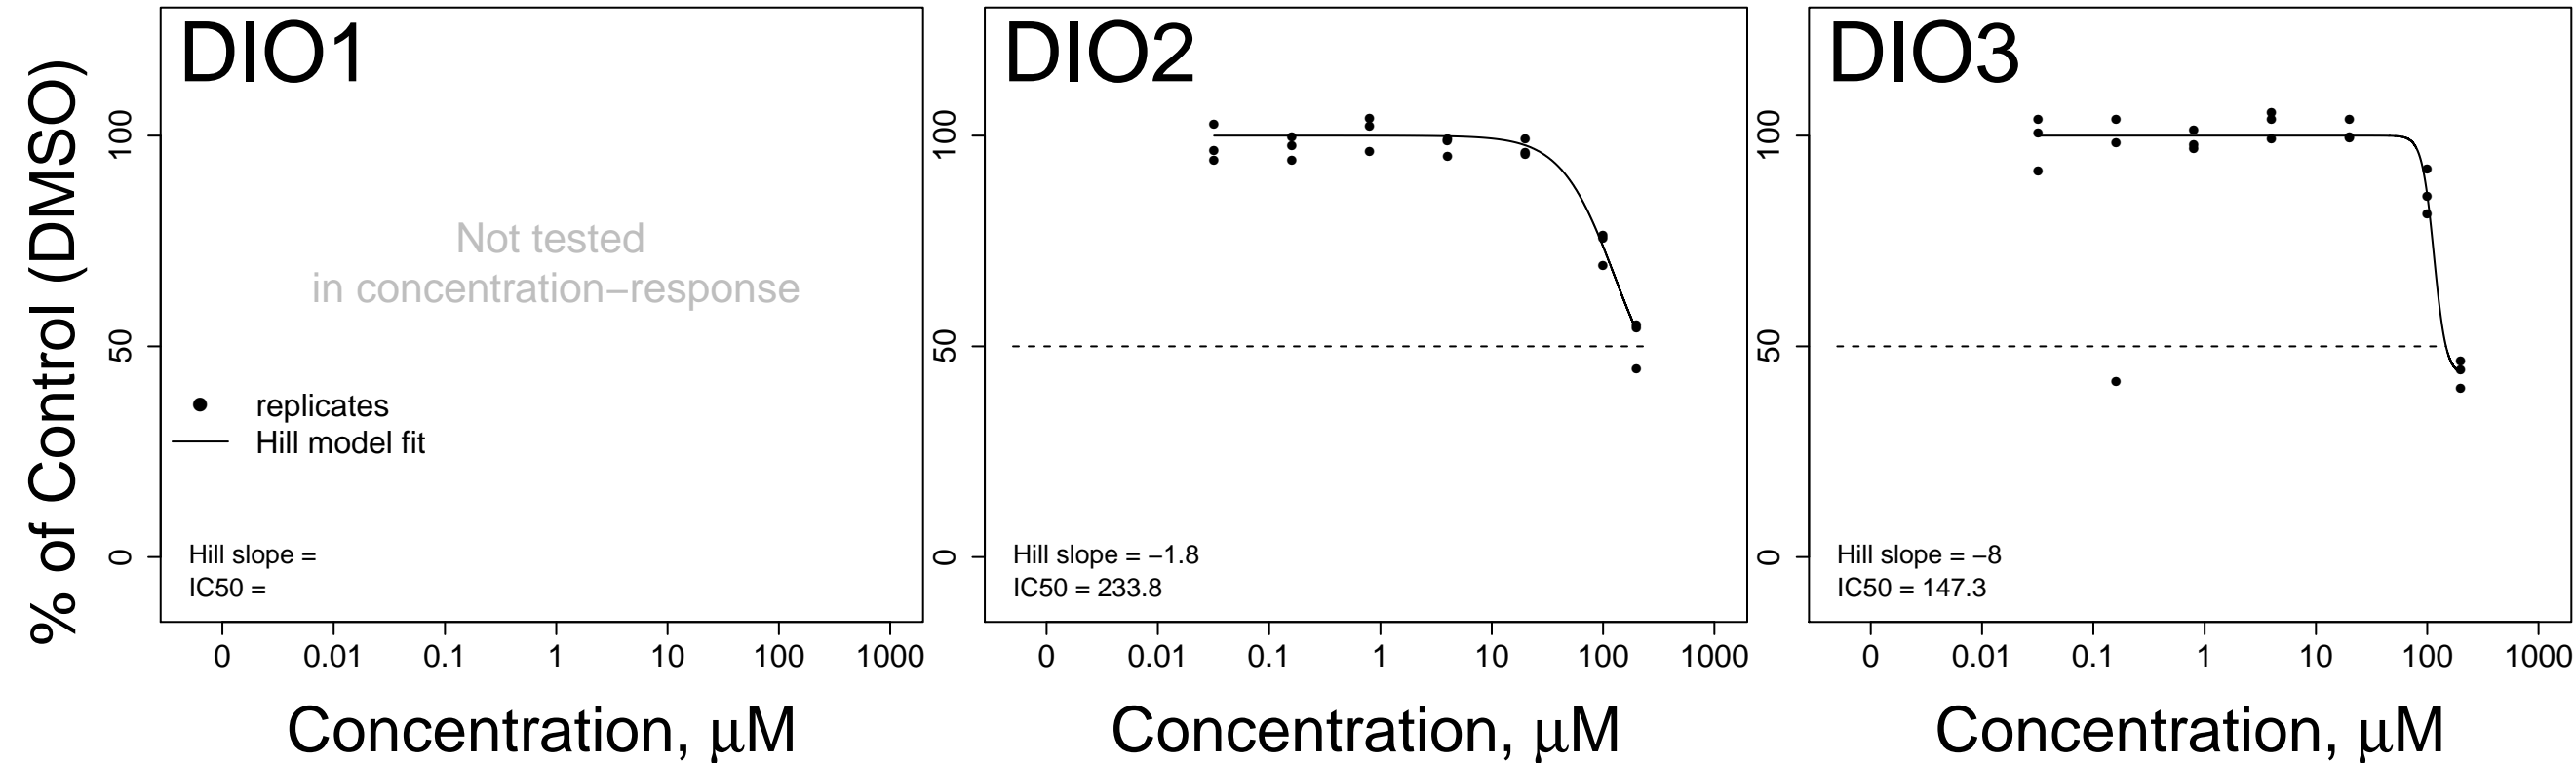

Triclosan CASRN: 3380-34-5

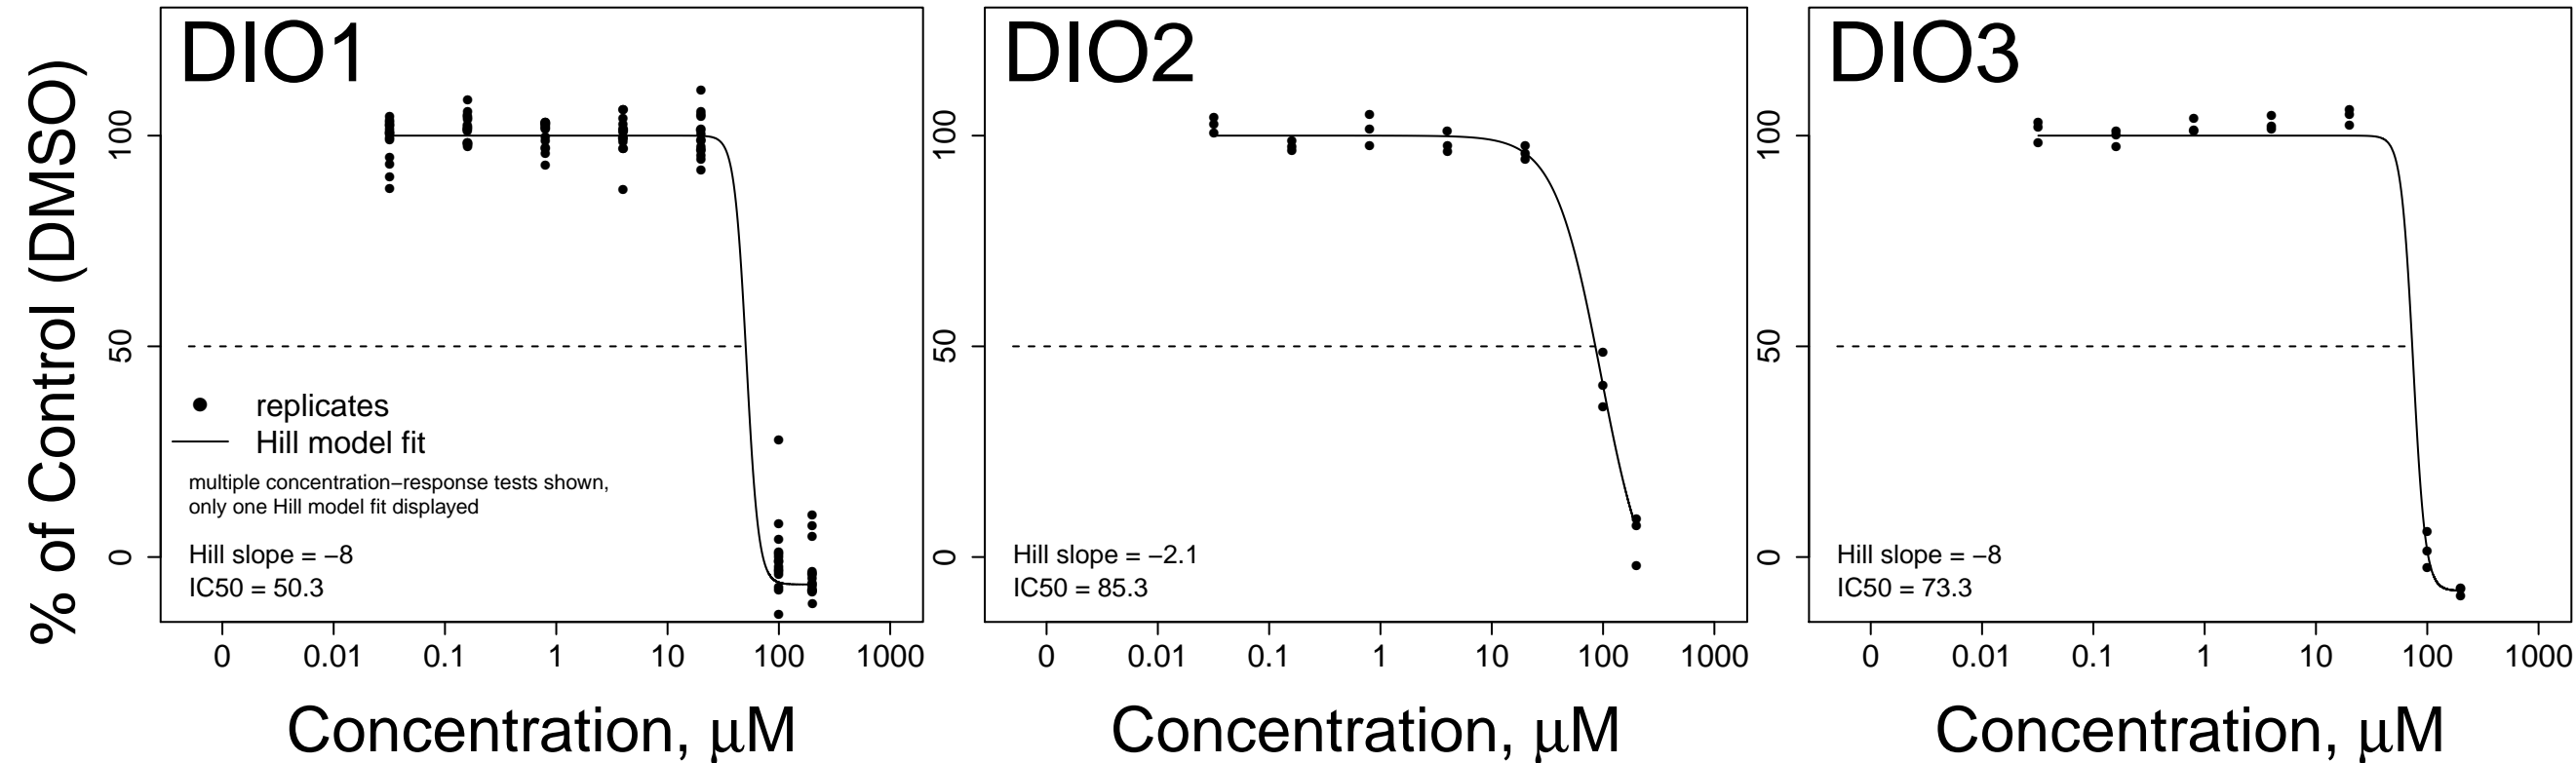

Acetochlor CASRN: 34256-82-1

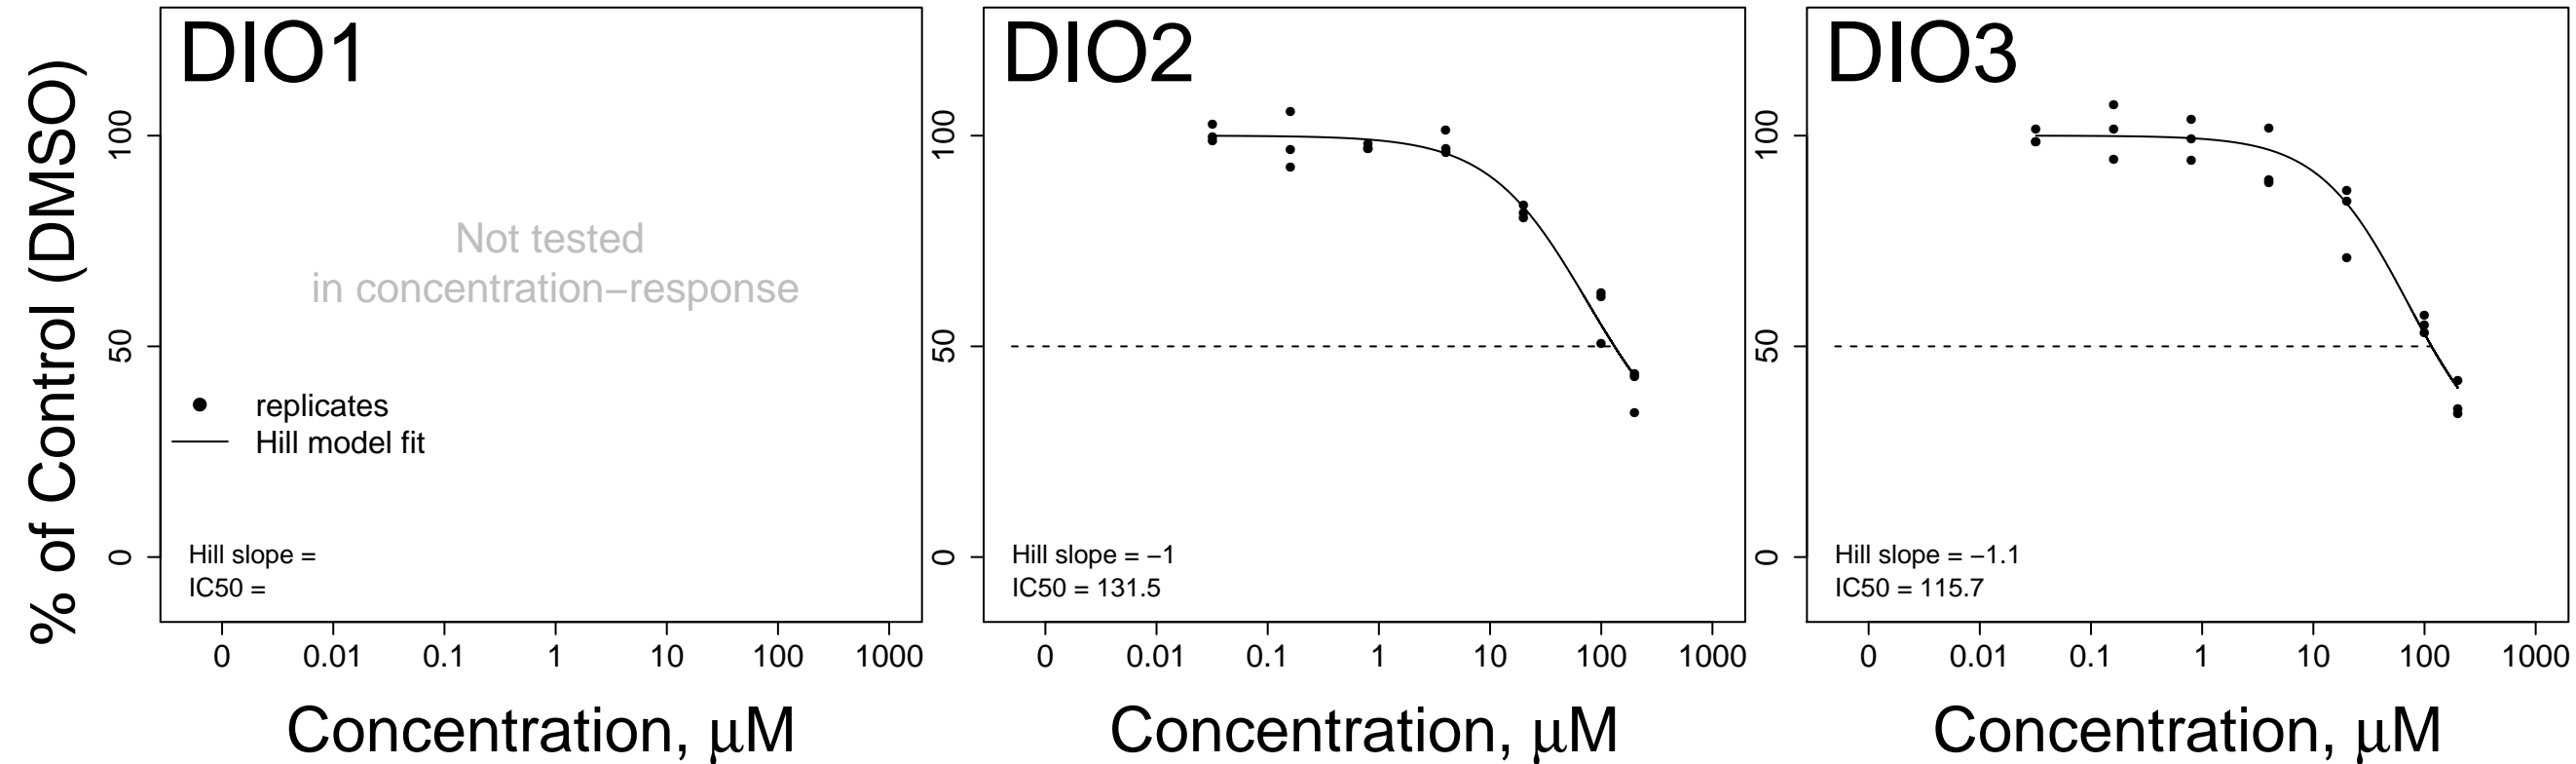

Fluoxastrobin CASRN: 361377-29-9

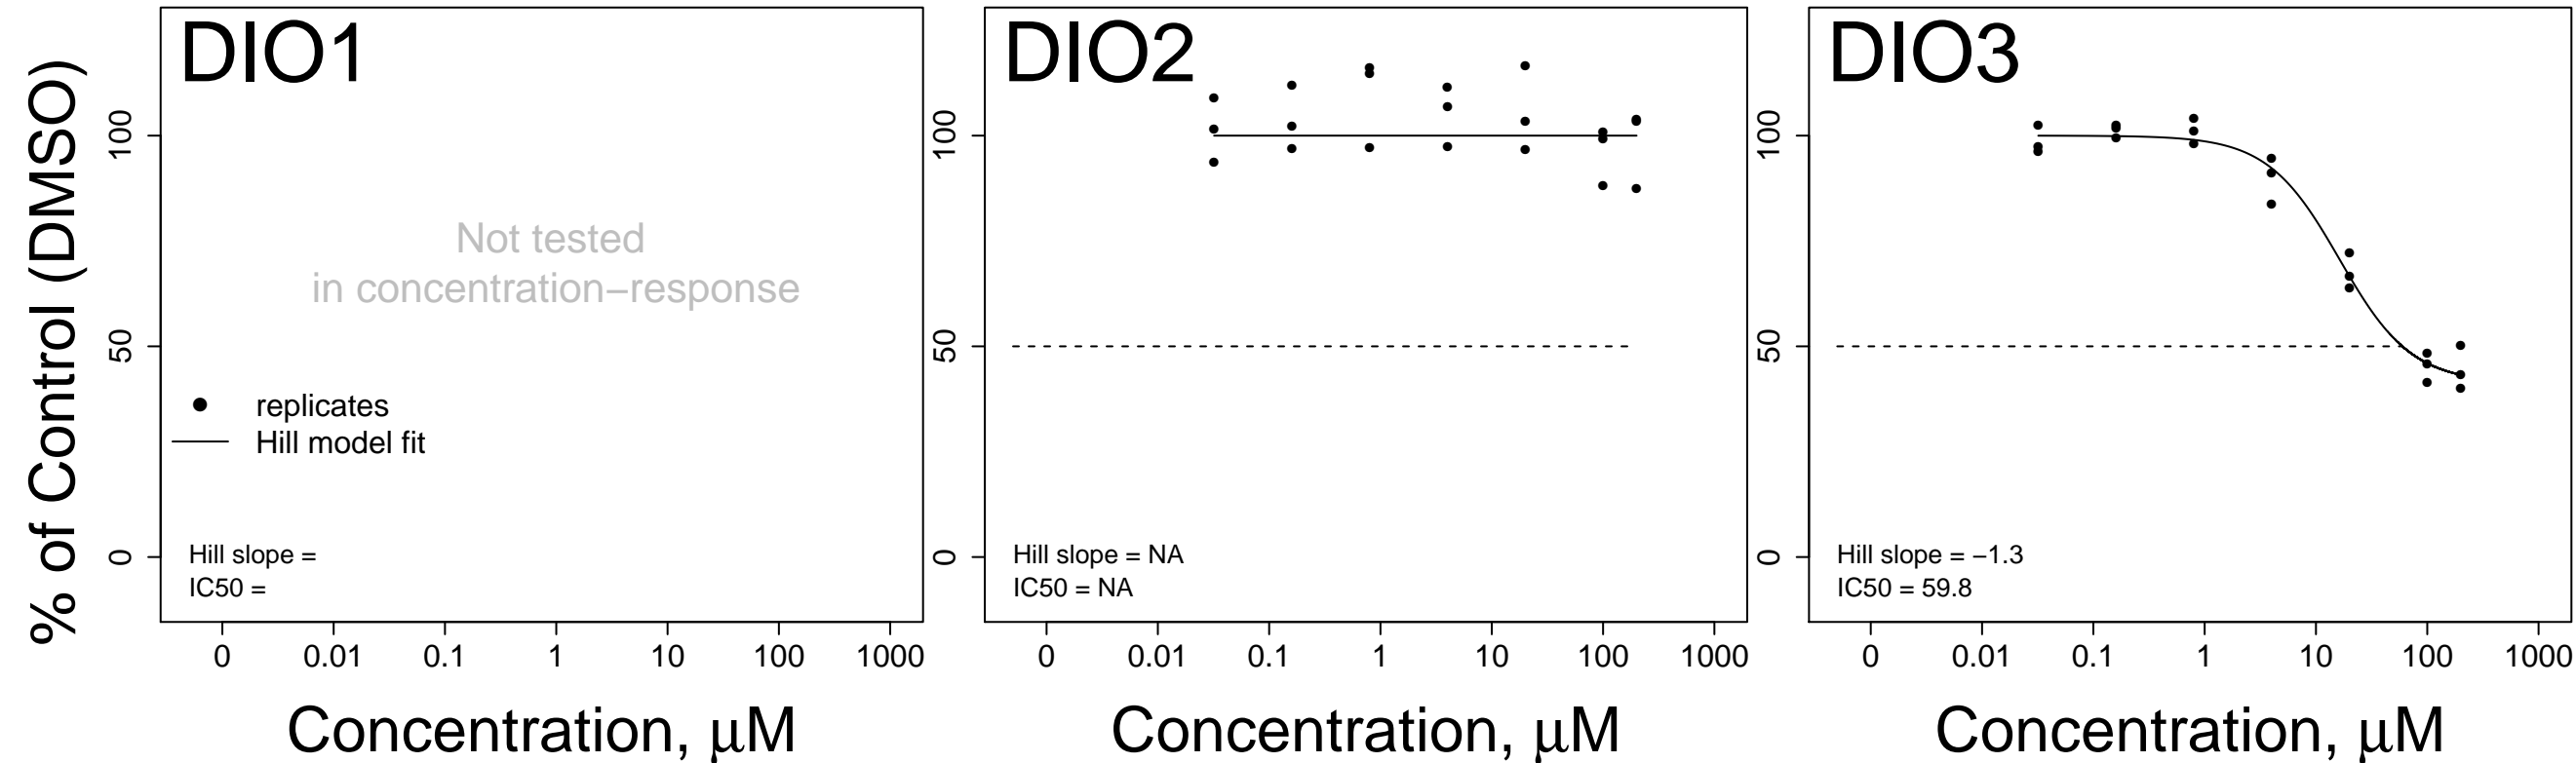

Metolachlor CASRN: 51218-45-2

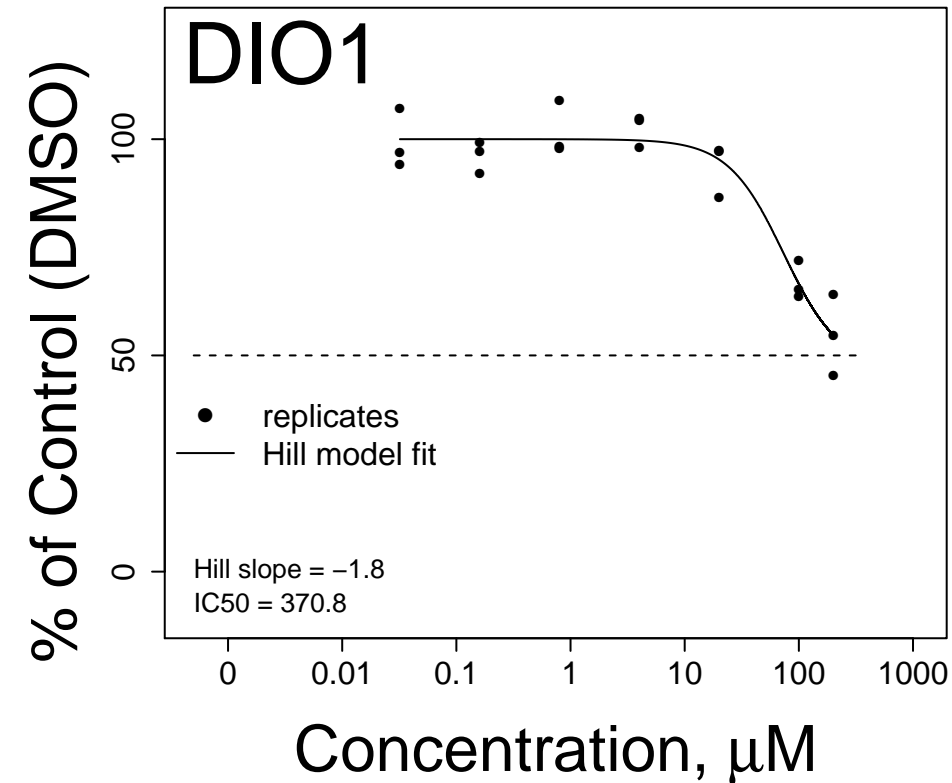

Fenthion CASRN: 55-38-9

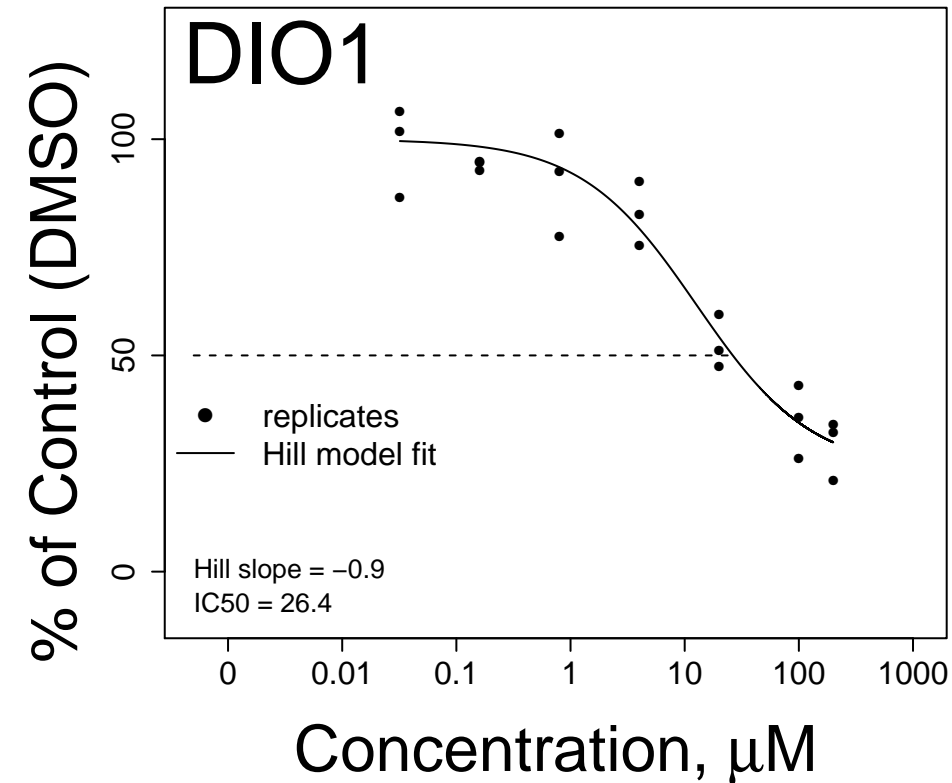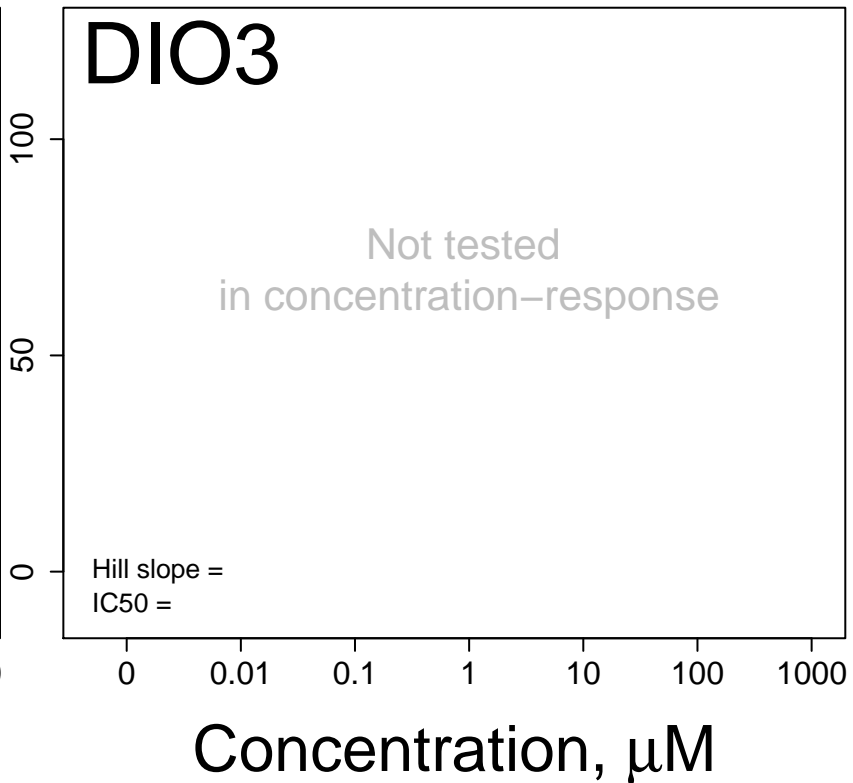

Allethrin CASRN: 584-79-2

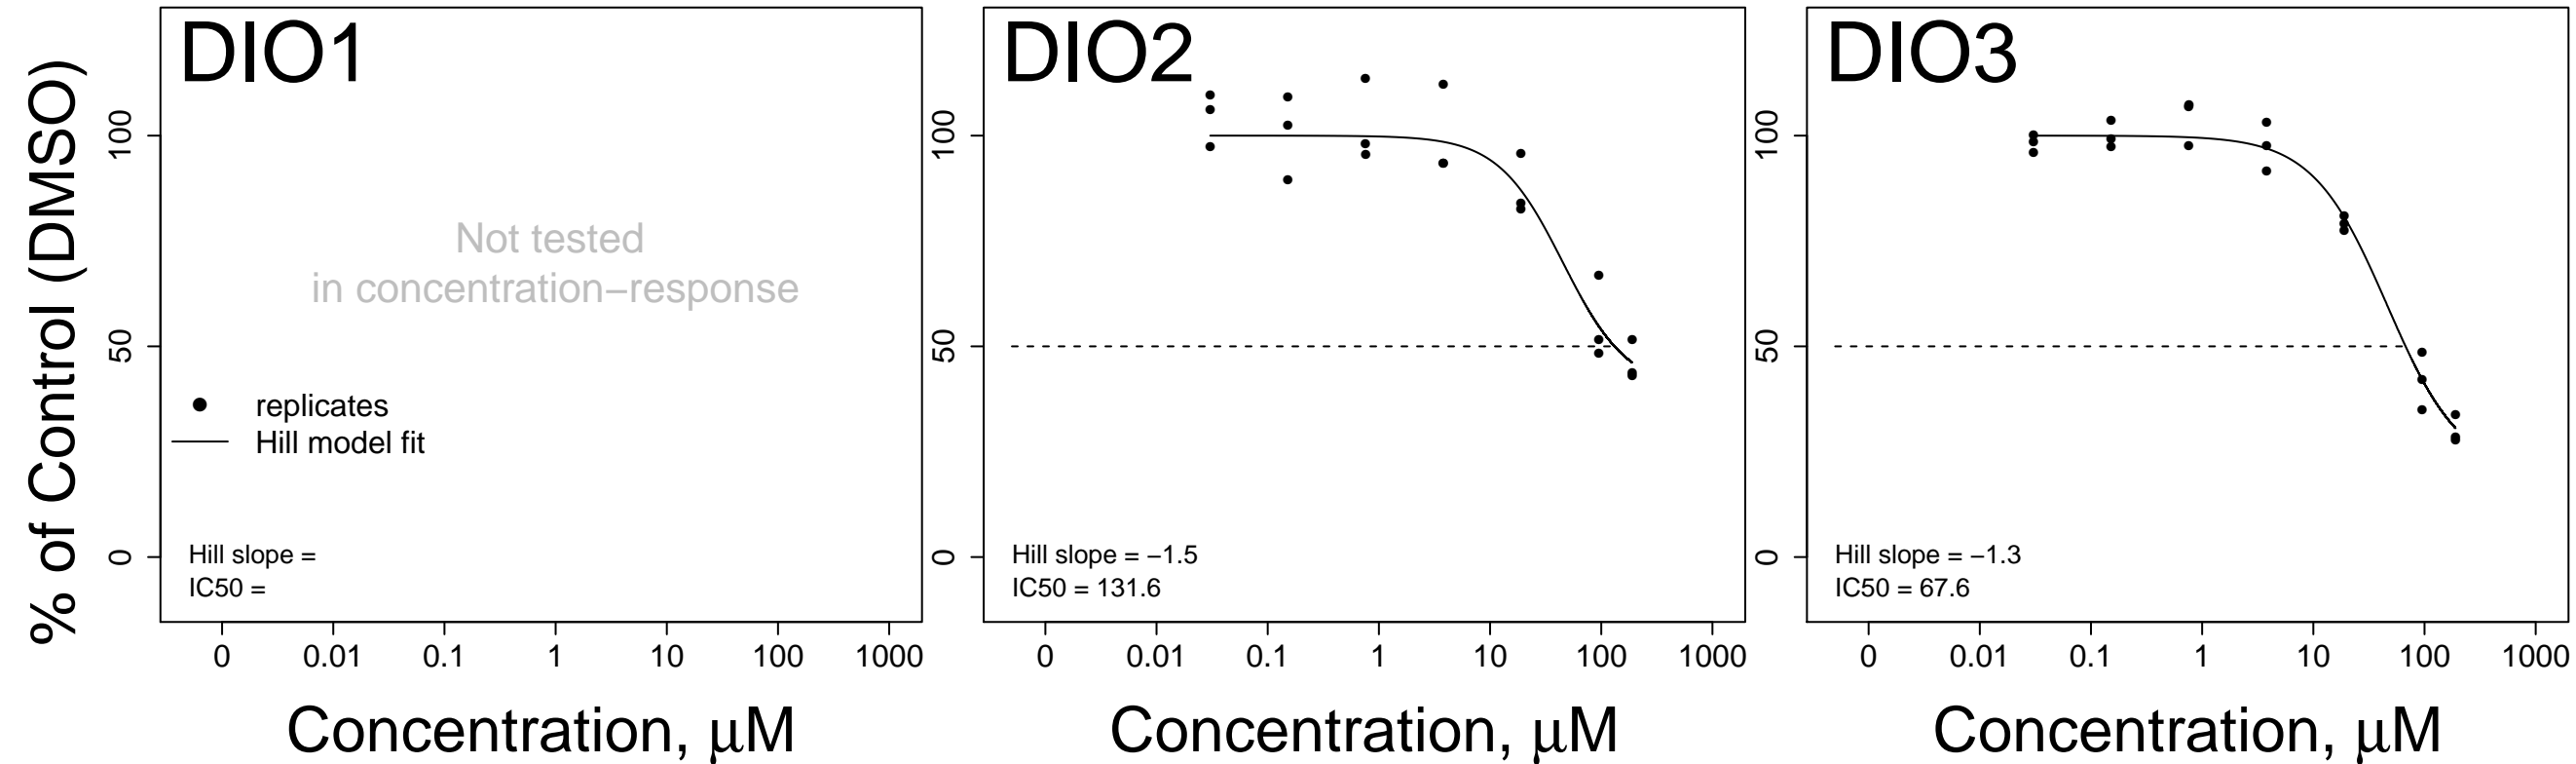



Oxytetracycline dihydrate CASRN: 6153-64-6

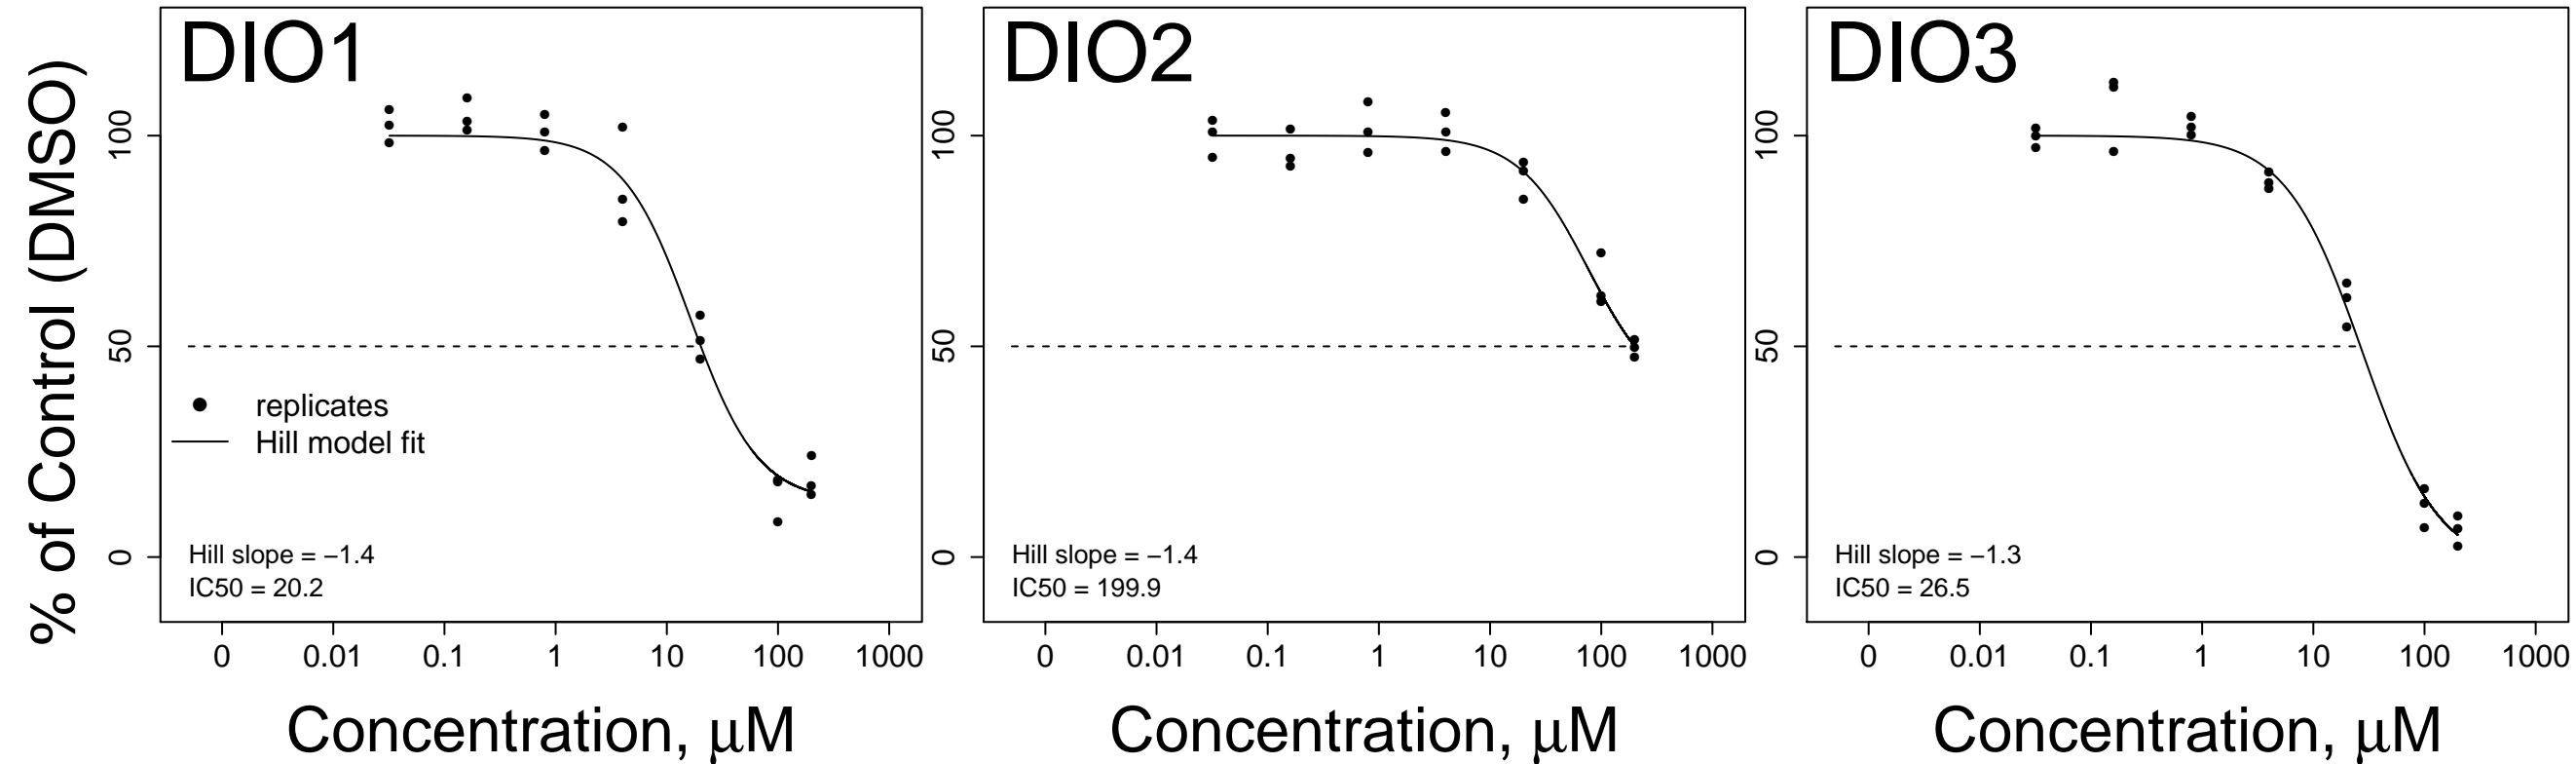

Fenoxaprop-ethyl CASRN: 66441-23-4

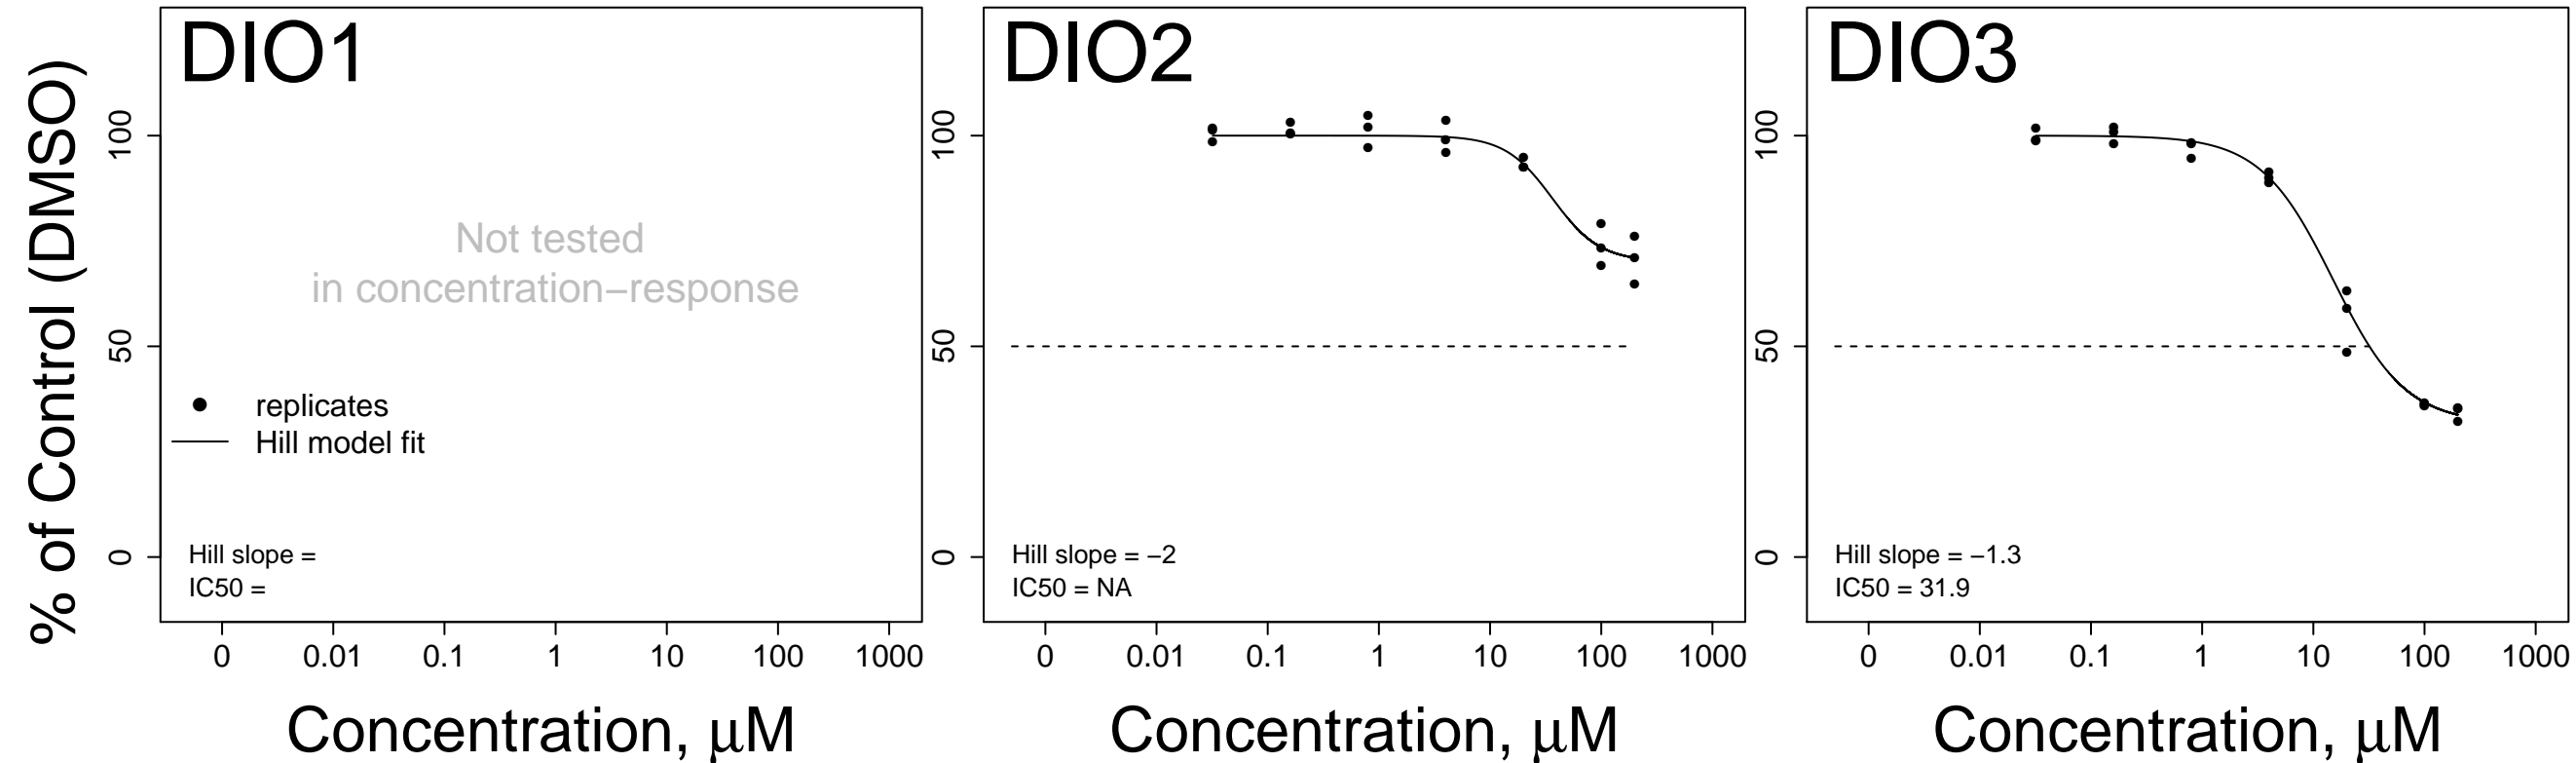

Triflumizole CASRN: 68694-11-1

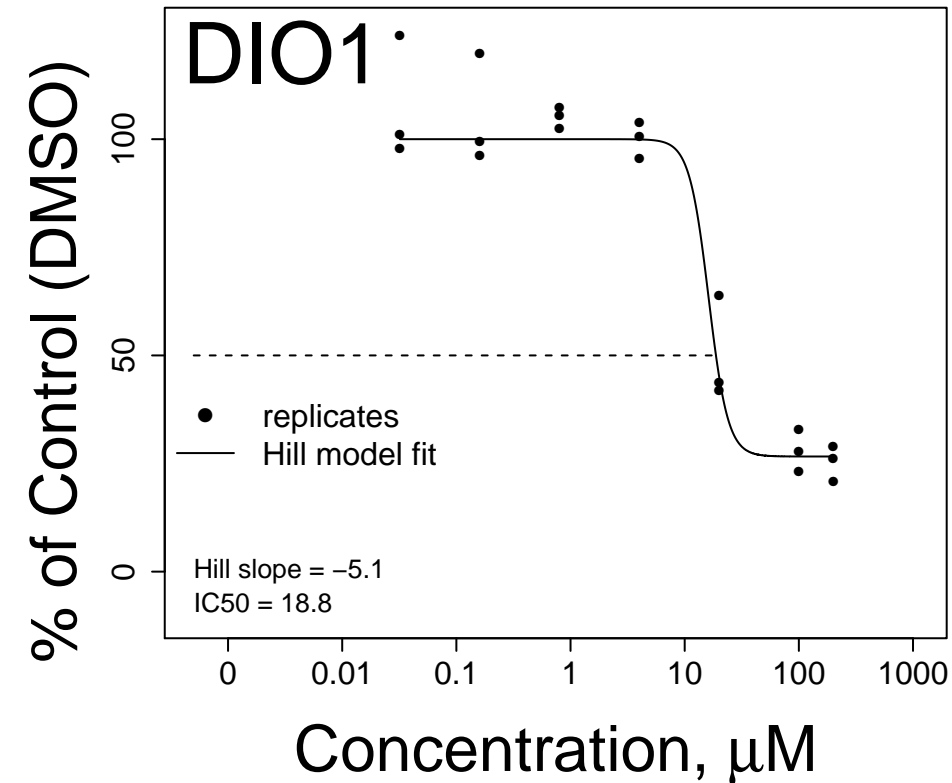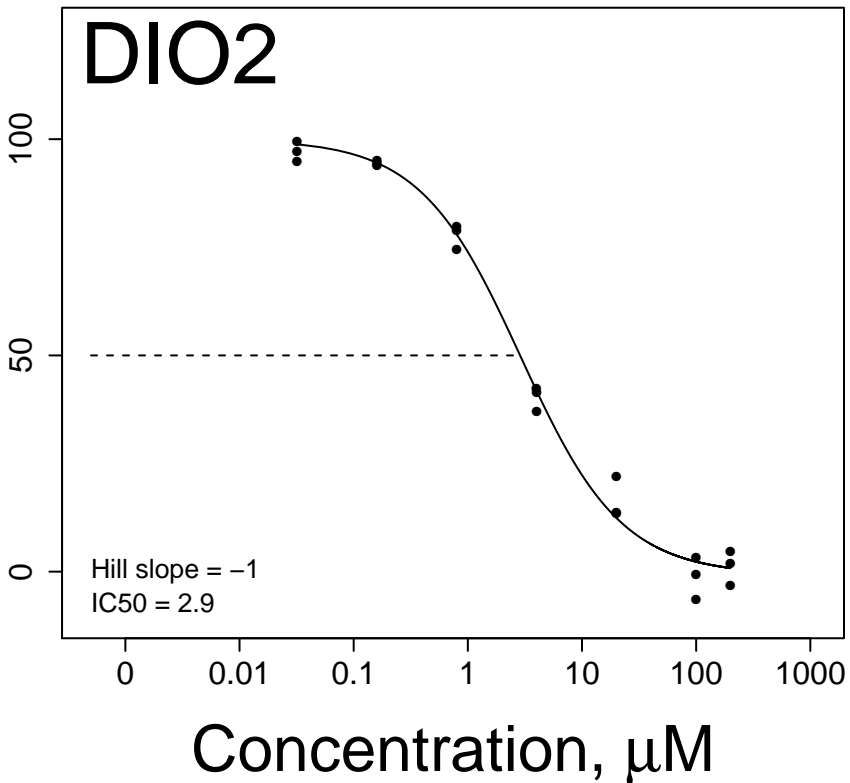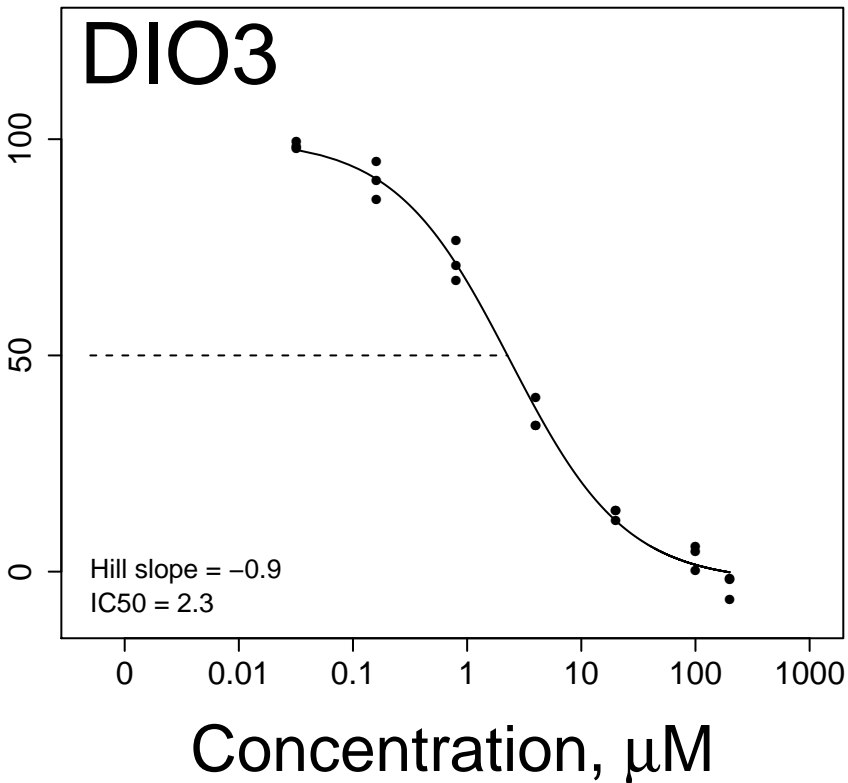

Tetramethrin CASRN: 7696-12-0

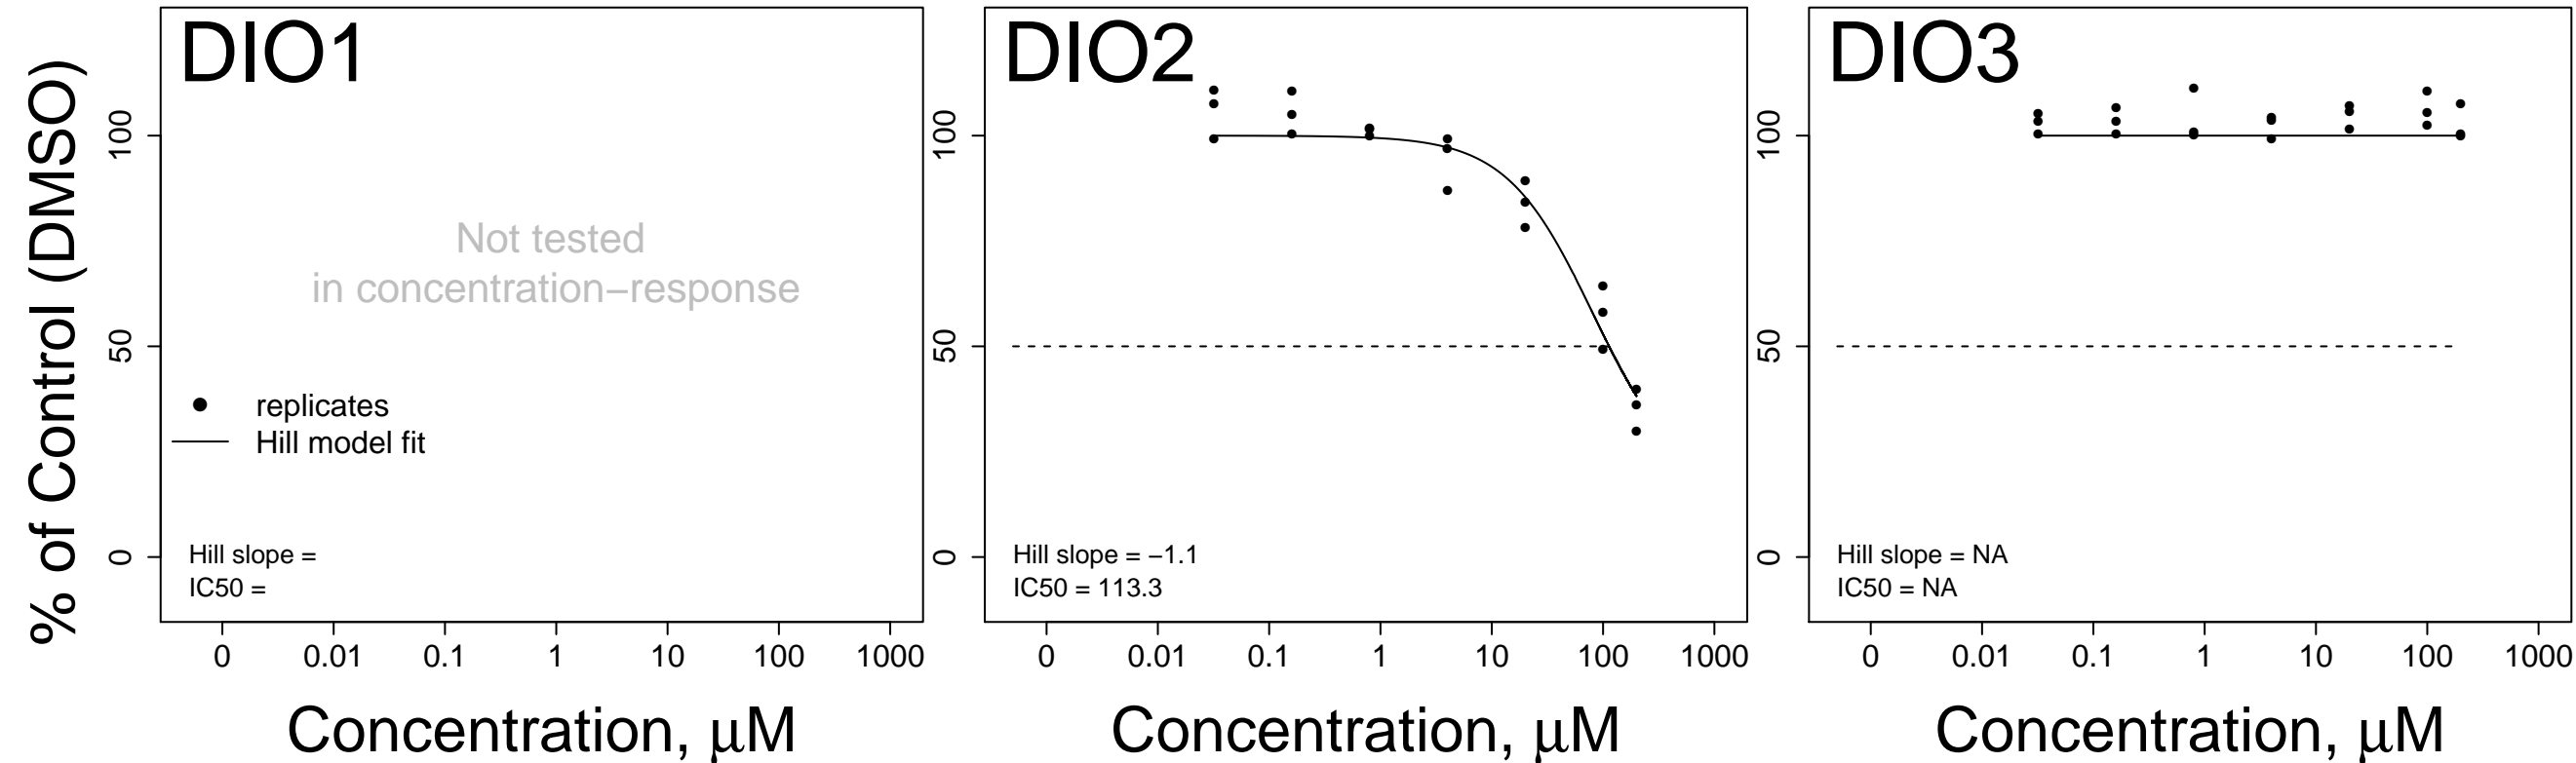

Fluazinam CASRN: 79622-59-6

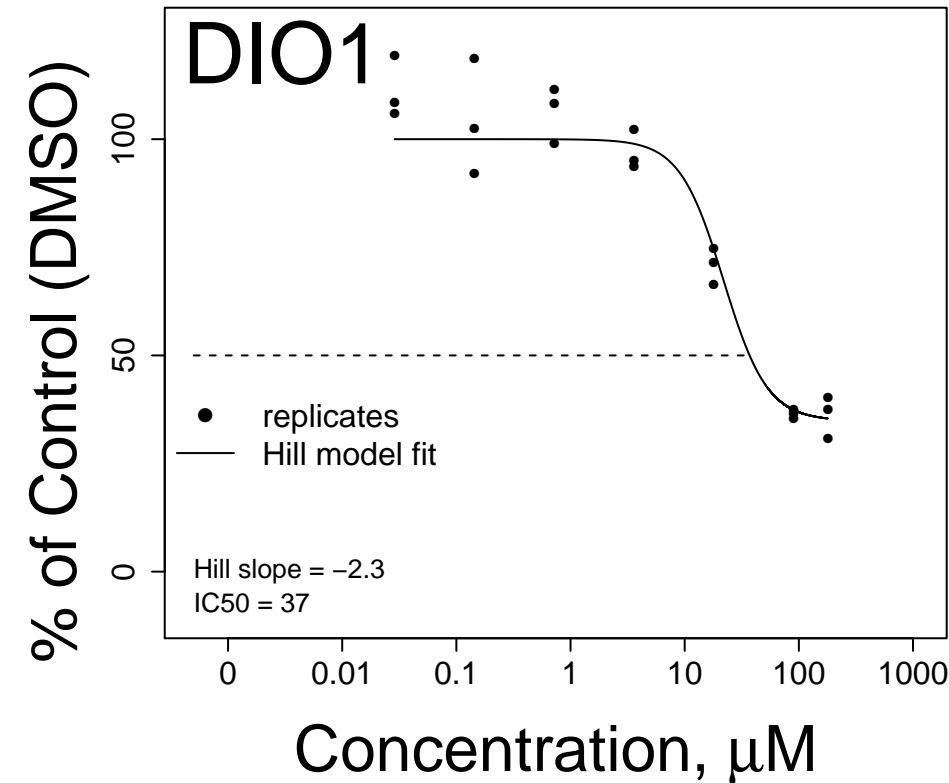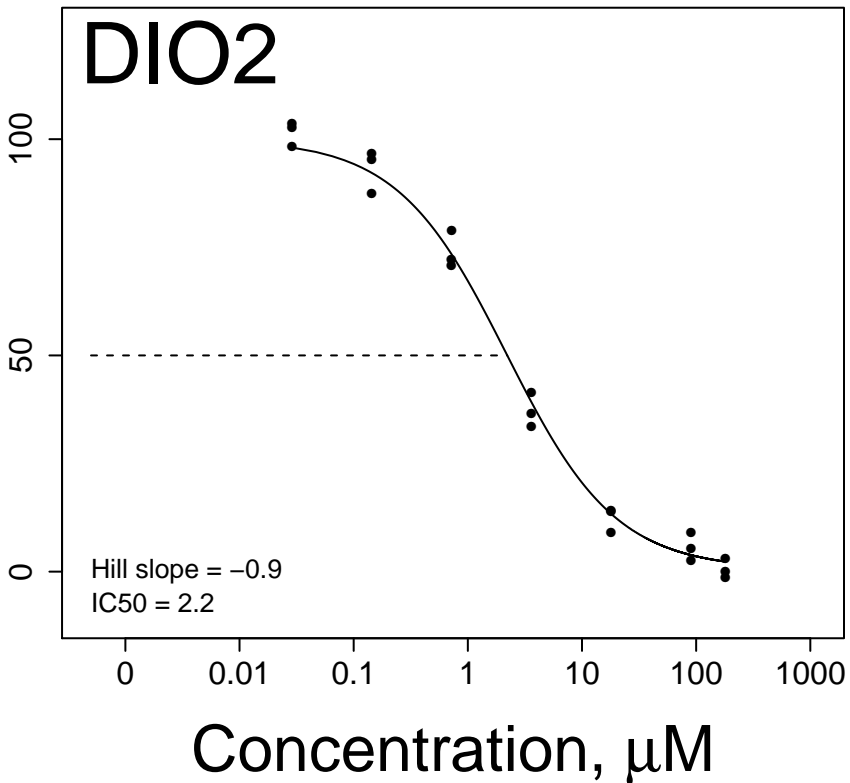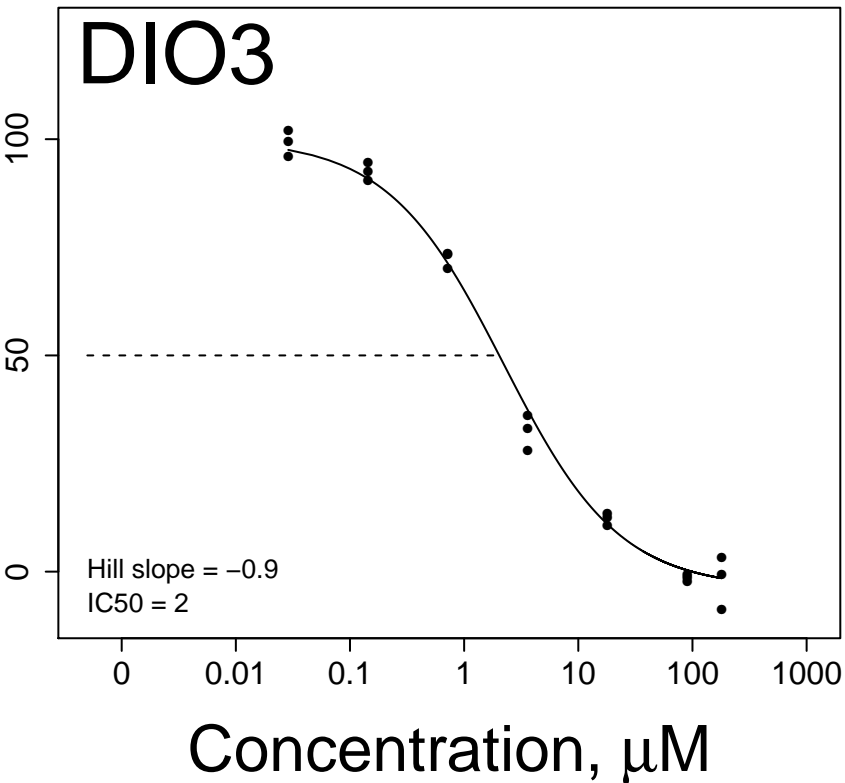

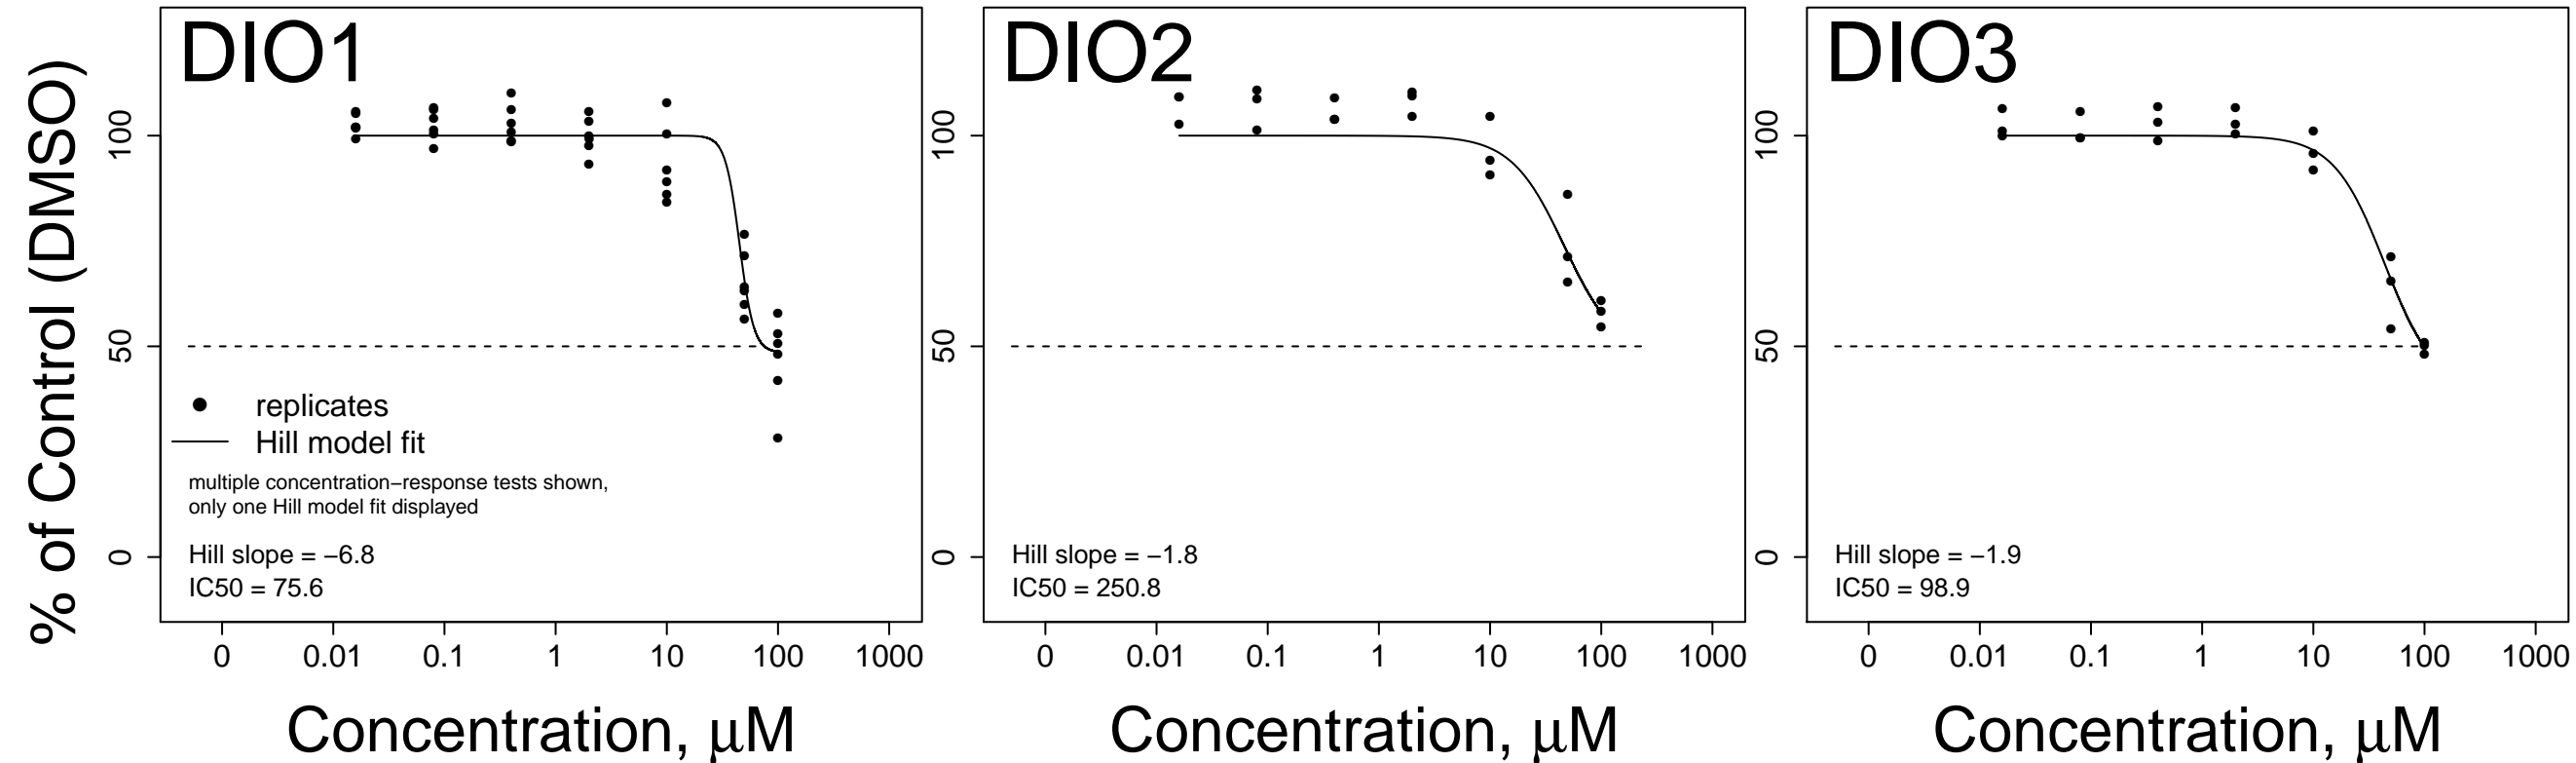

Rotenone CASRN: 83-79-4

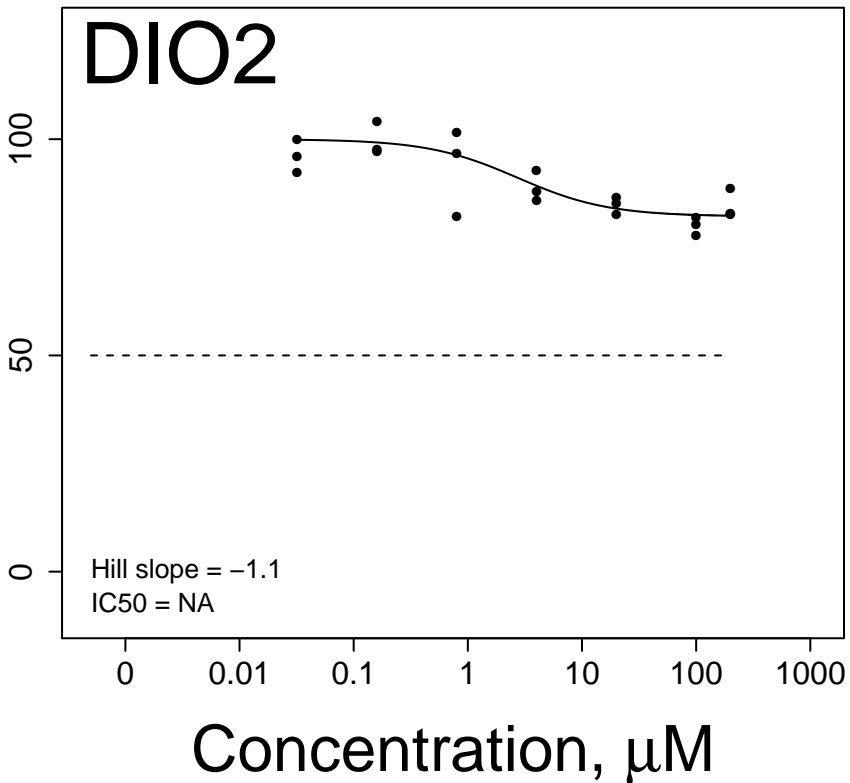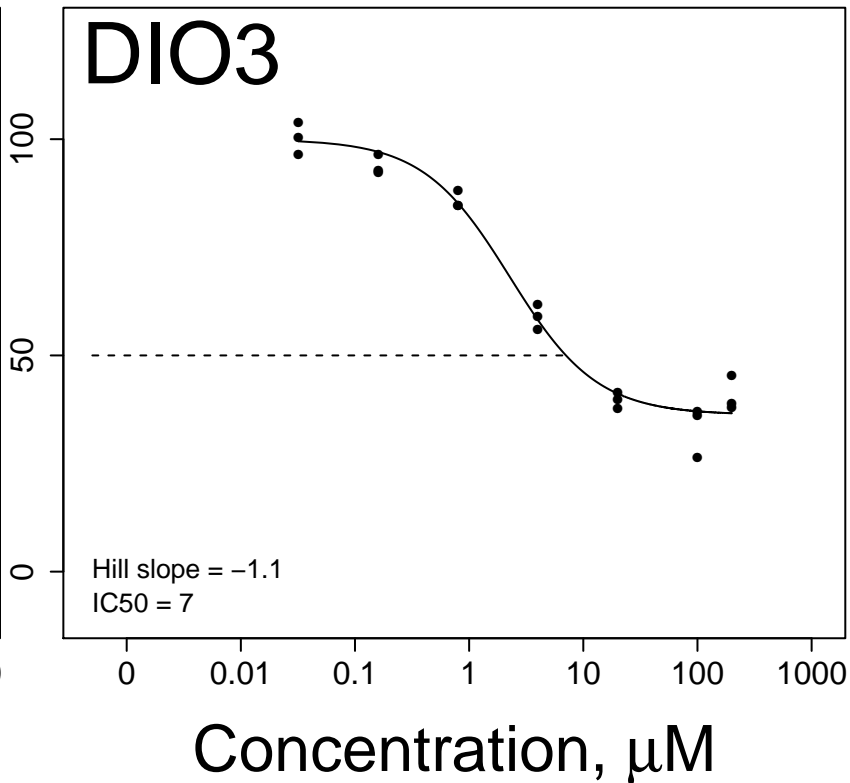

Azinphos-methyl CASRN: 86-50-0

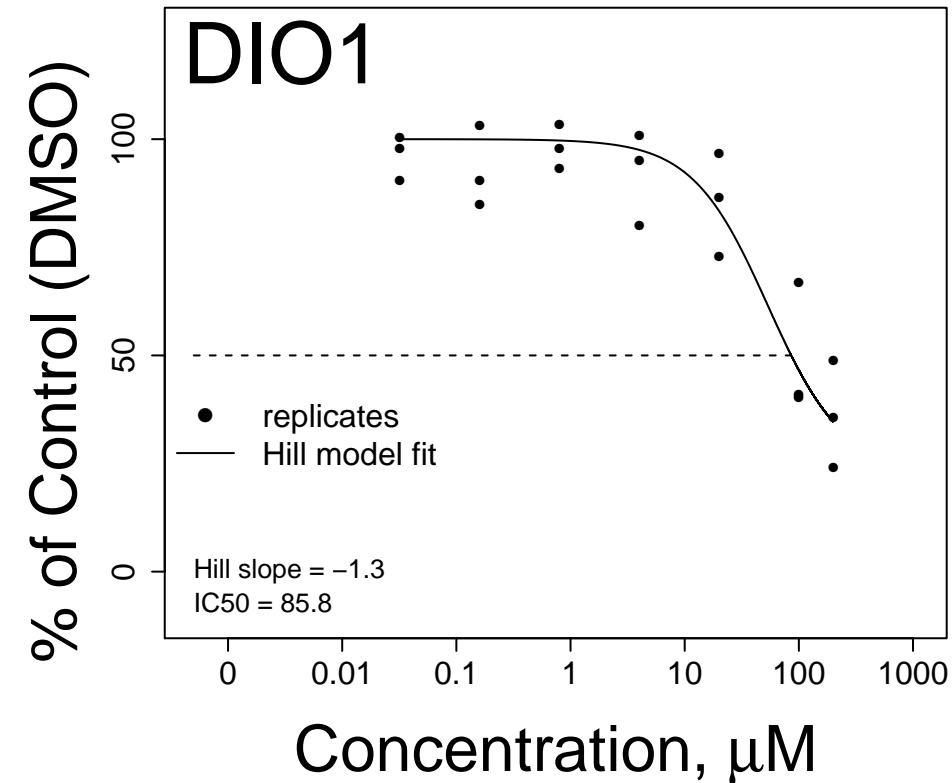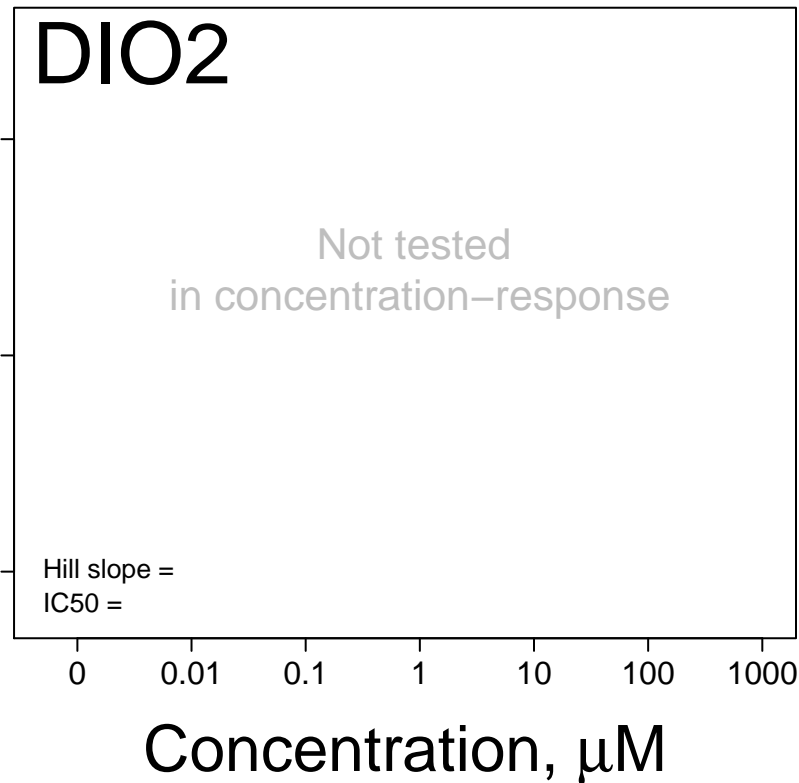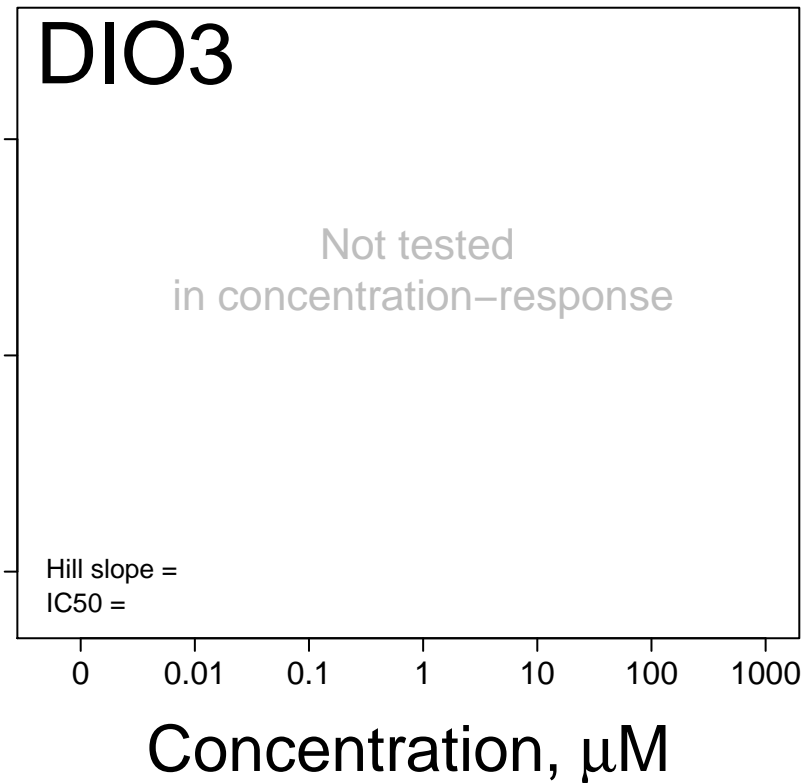



Flumiclorac-pentyl CASRN: 87546-18-7

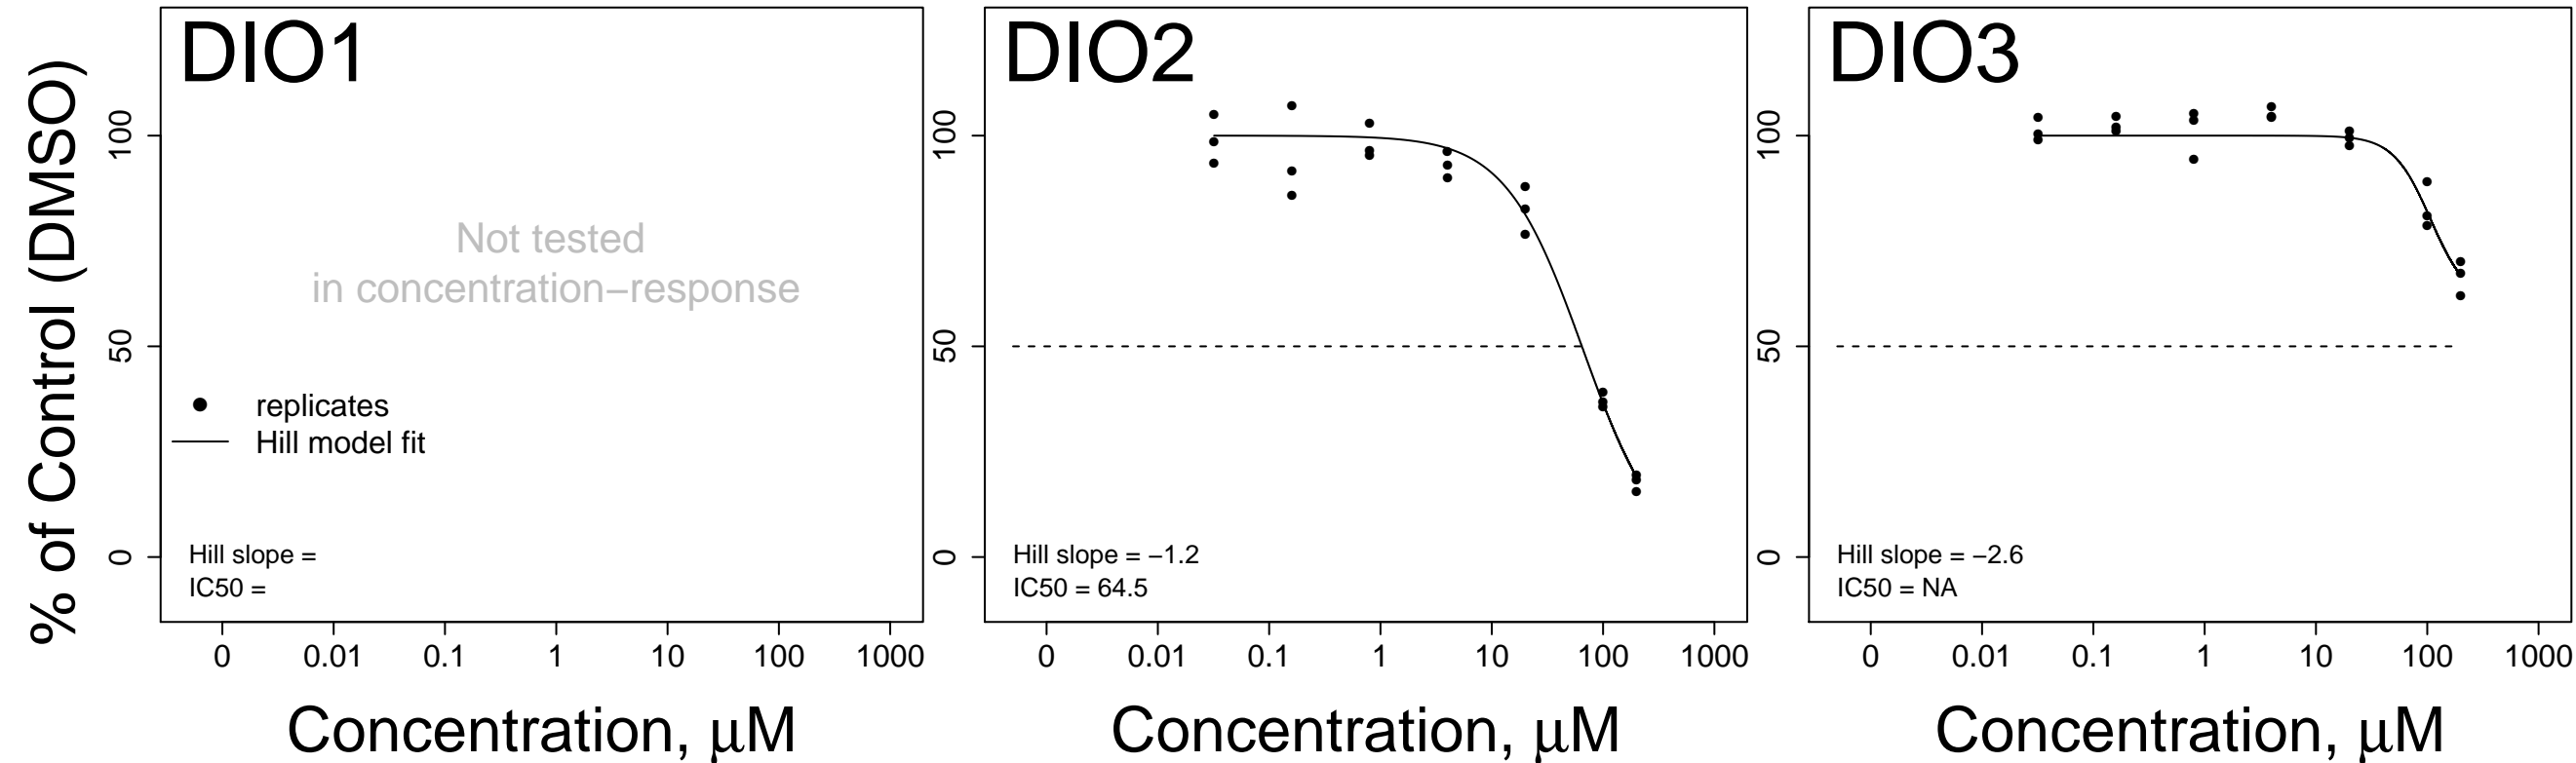

Milbemectin (mixture of 70% Milbemcin A4, 30% Milbemycin A3) CASRN: NOCAS\_34742

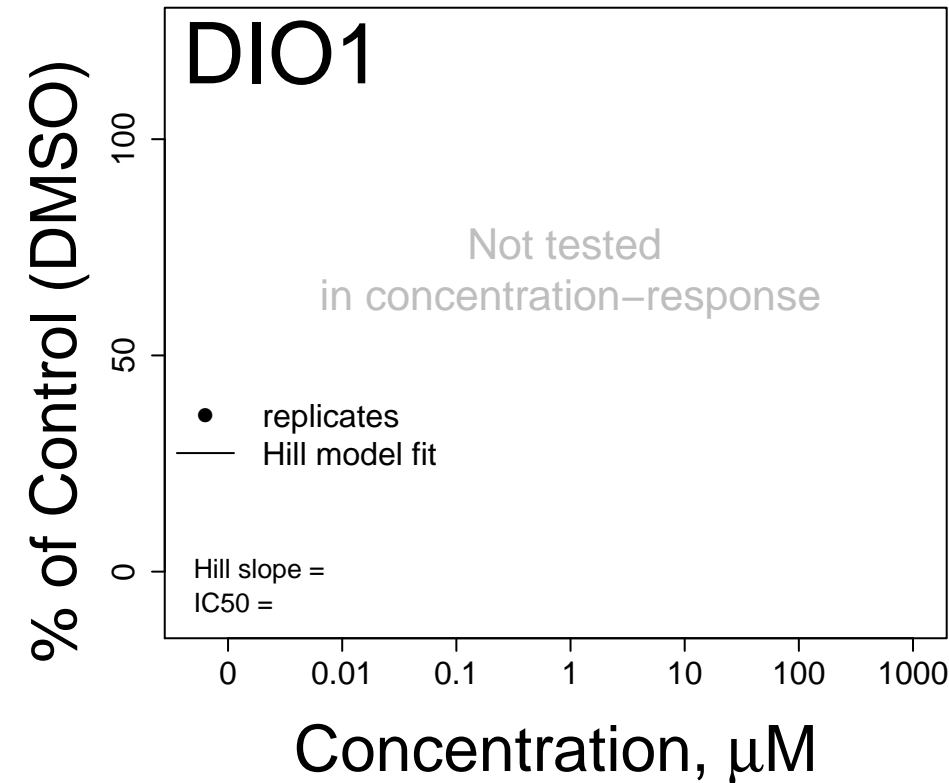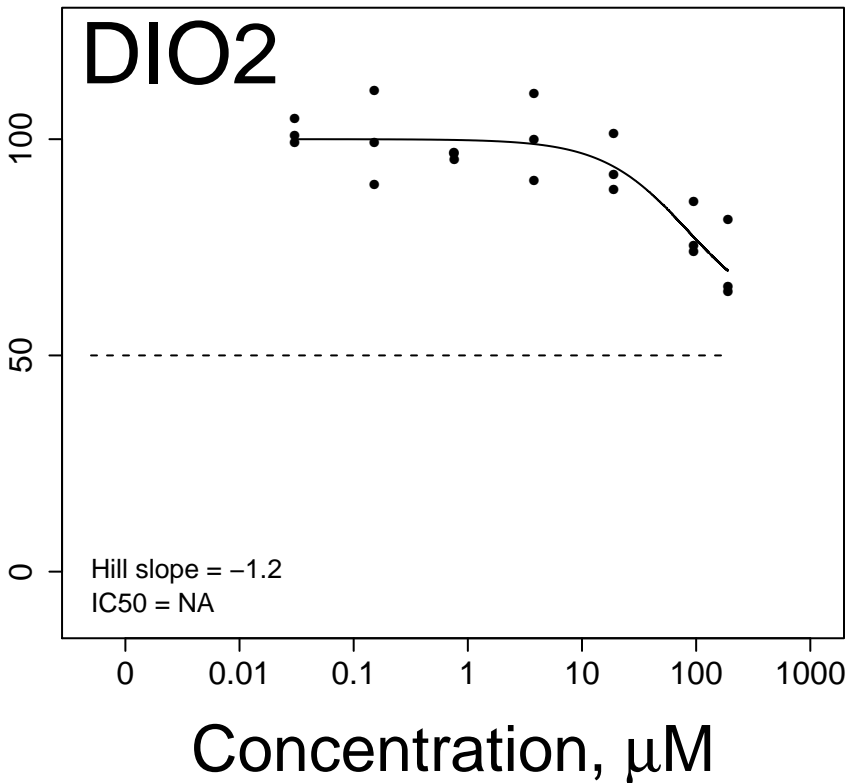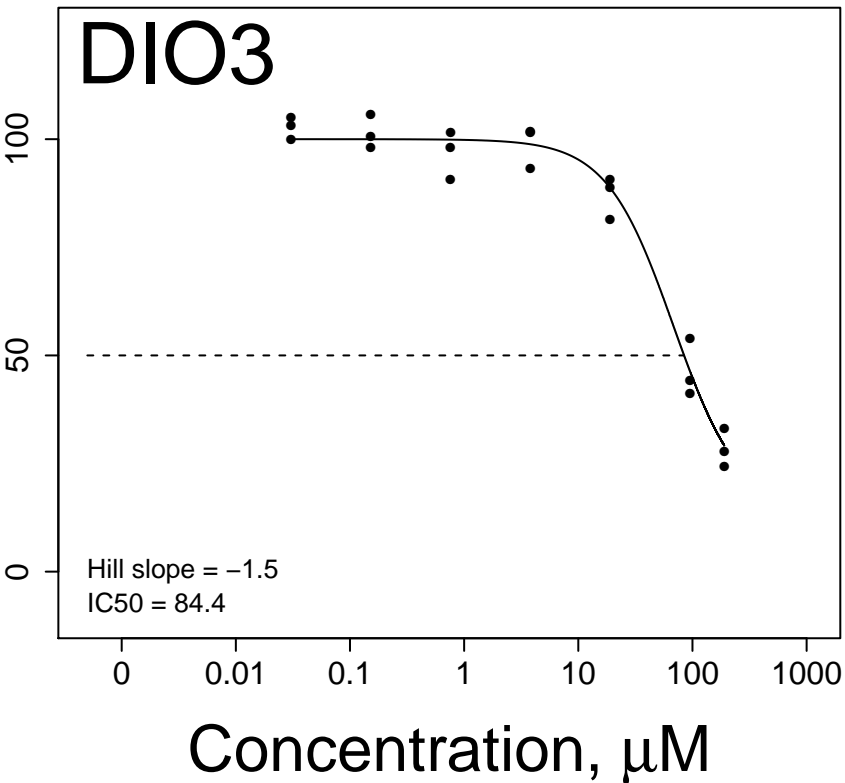

# 2-Benzylideneoctanal CASRN: 101-86-0

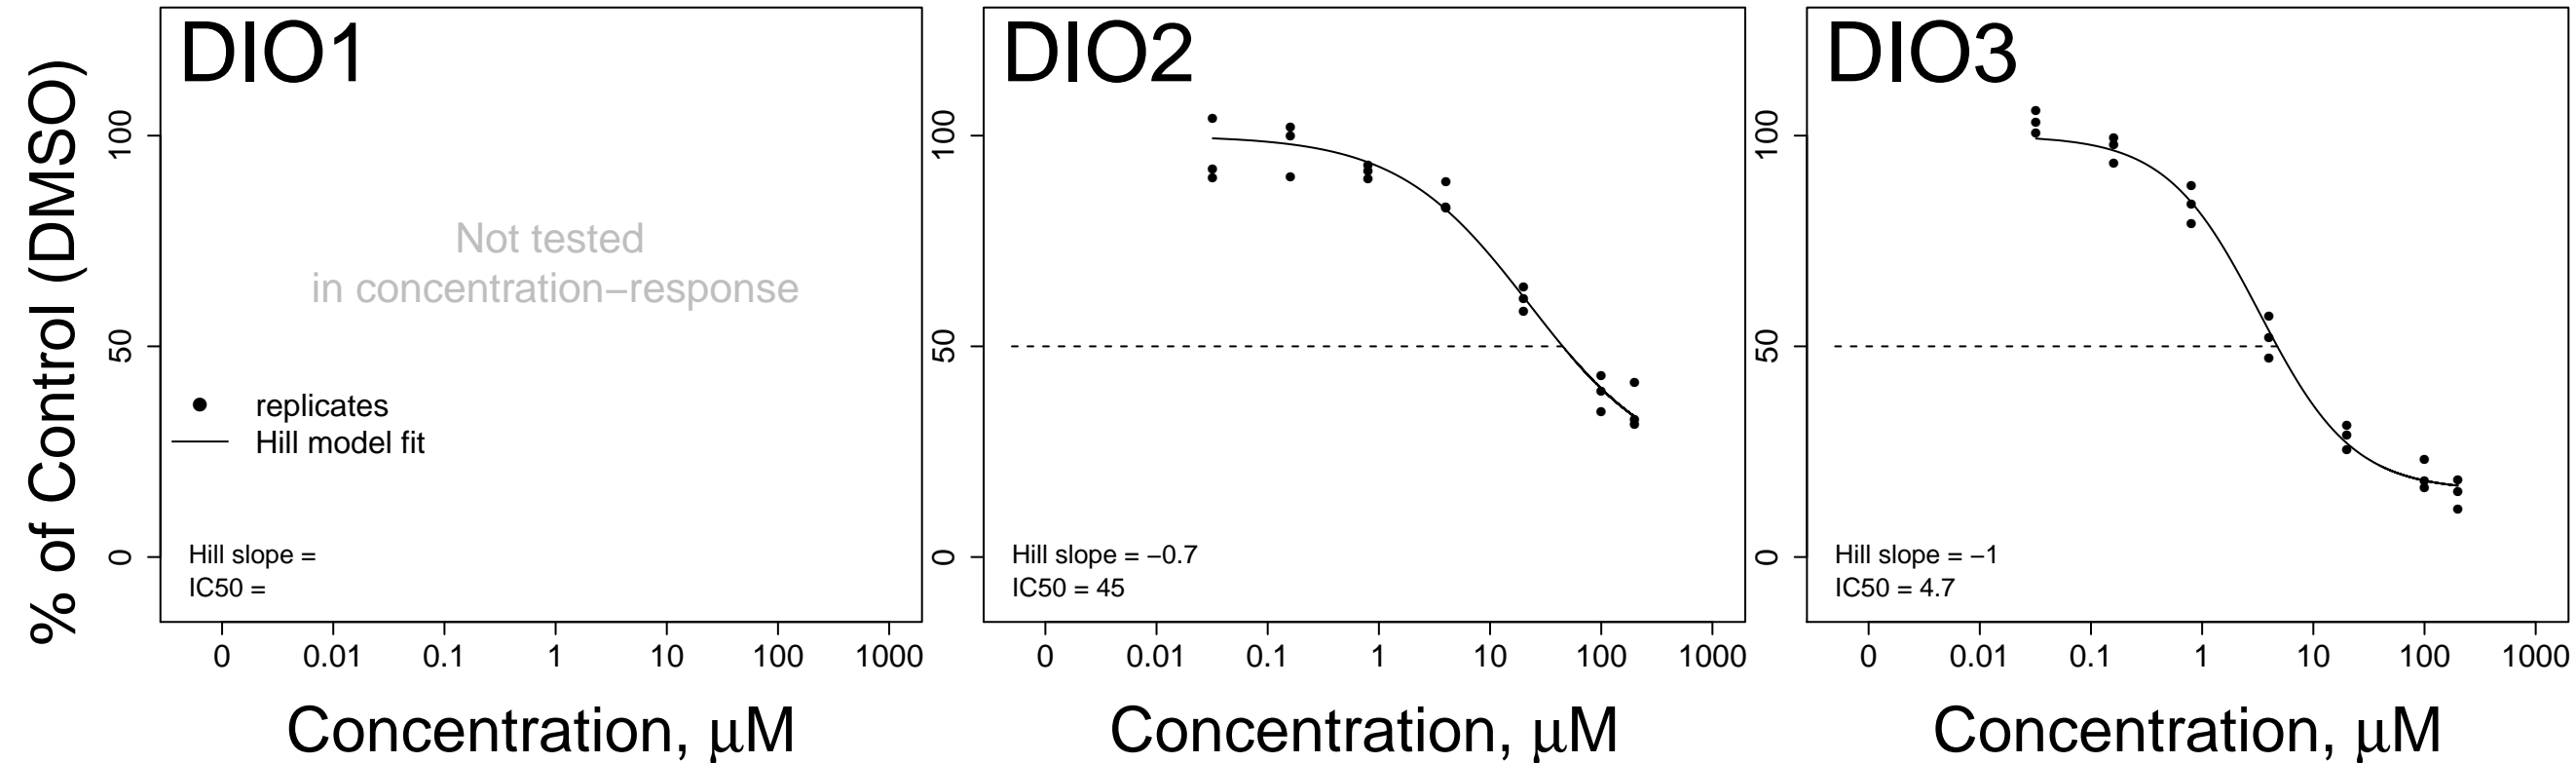

17beta-Trenbolone CASRN: 10161-33-8

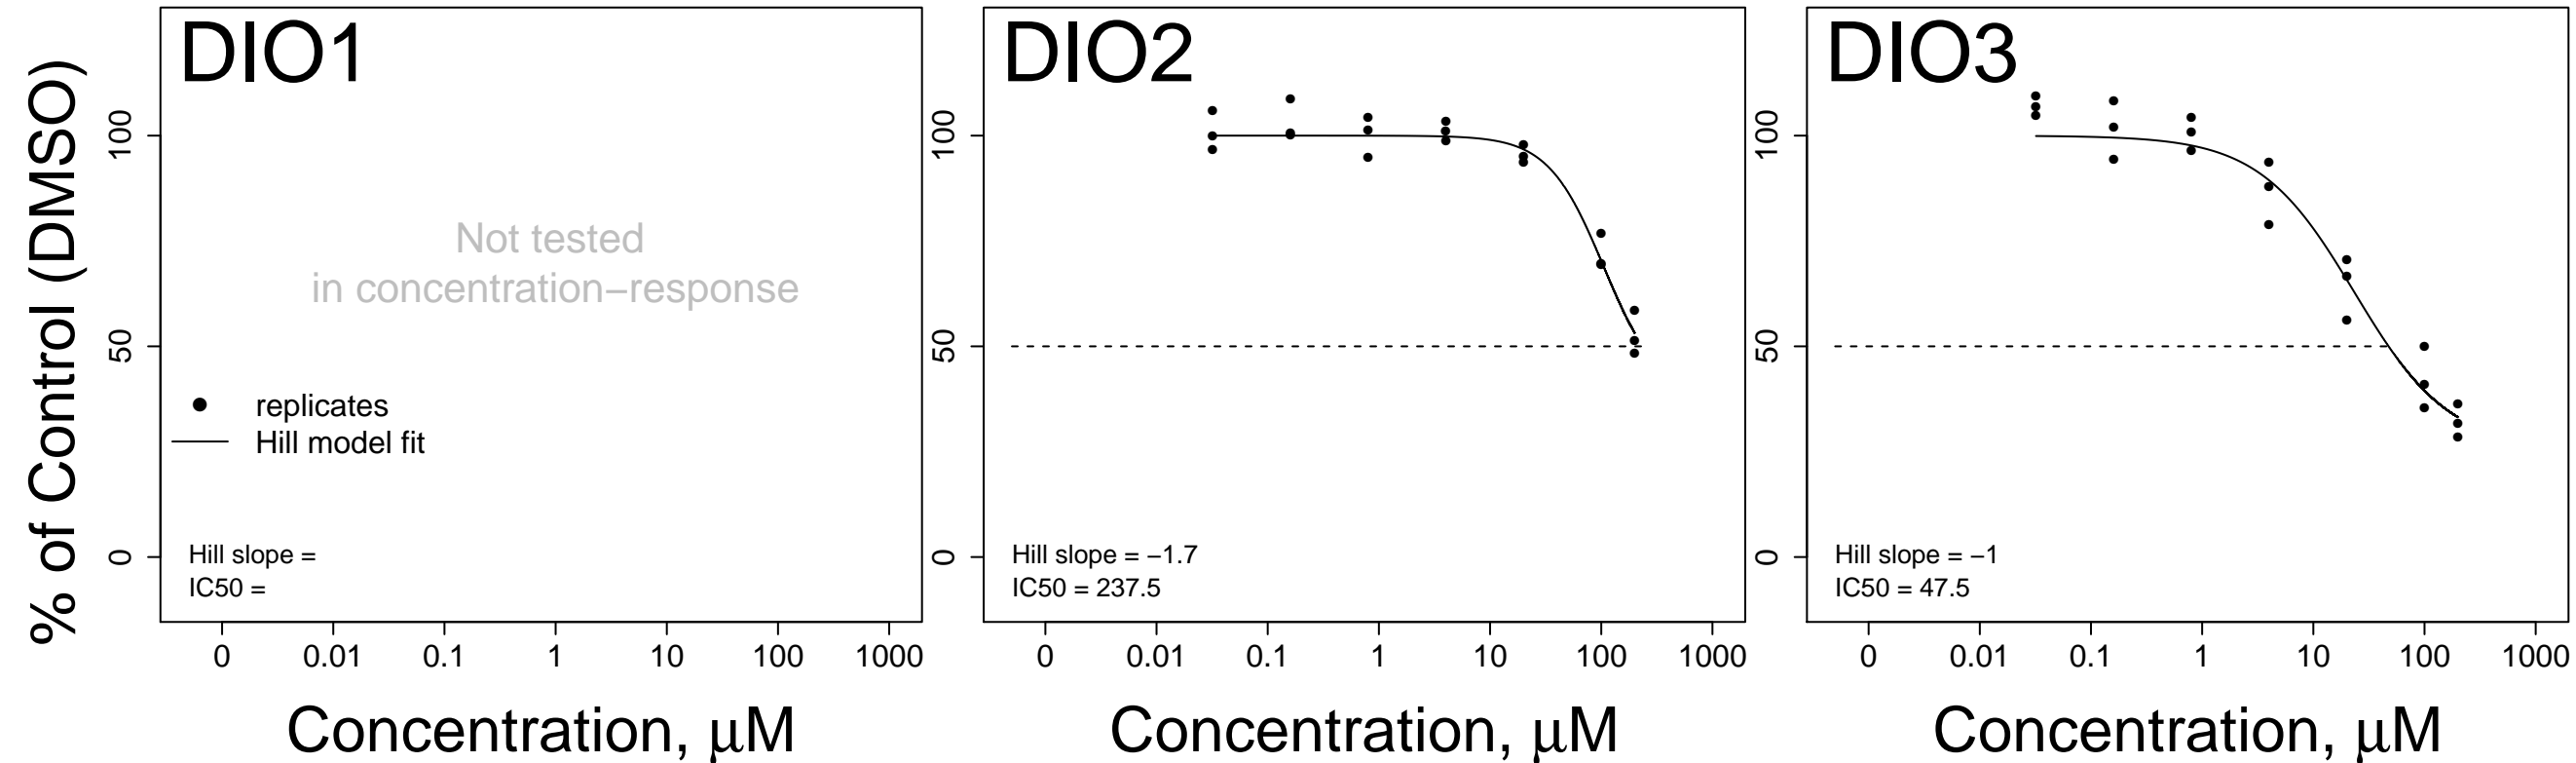

Octyl gallate CASRN: 1034-01-1

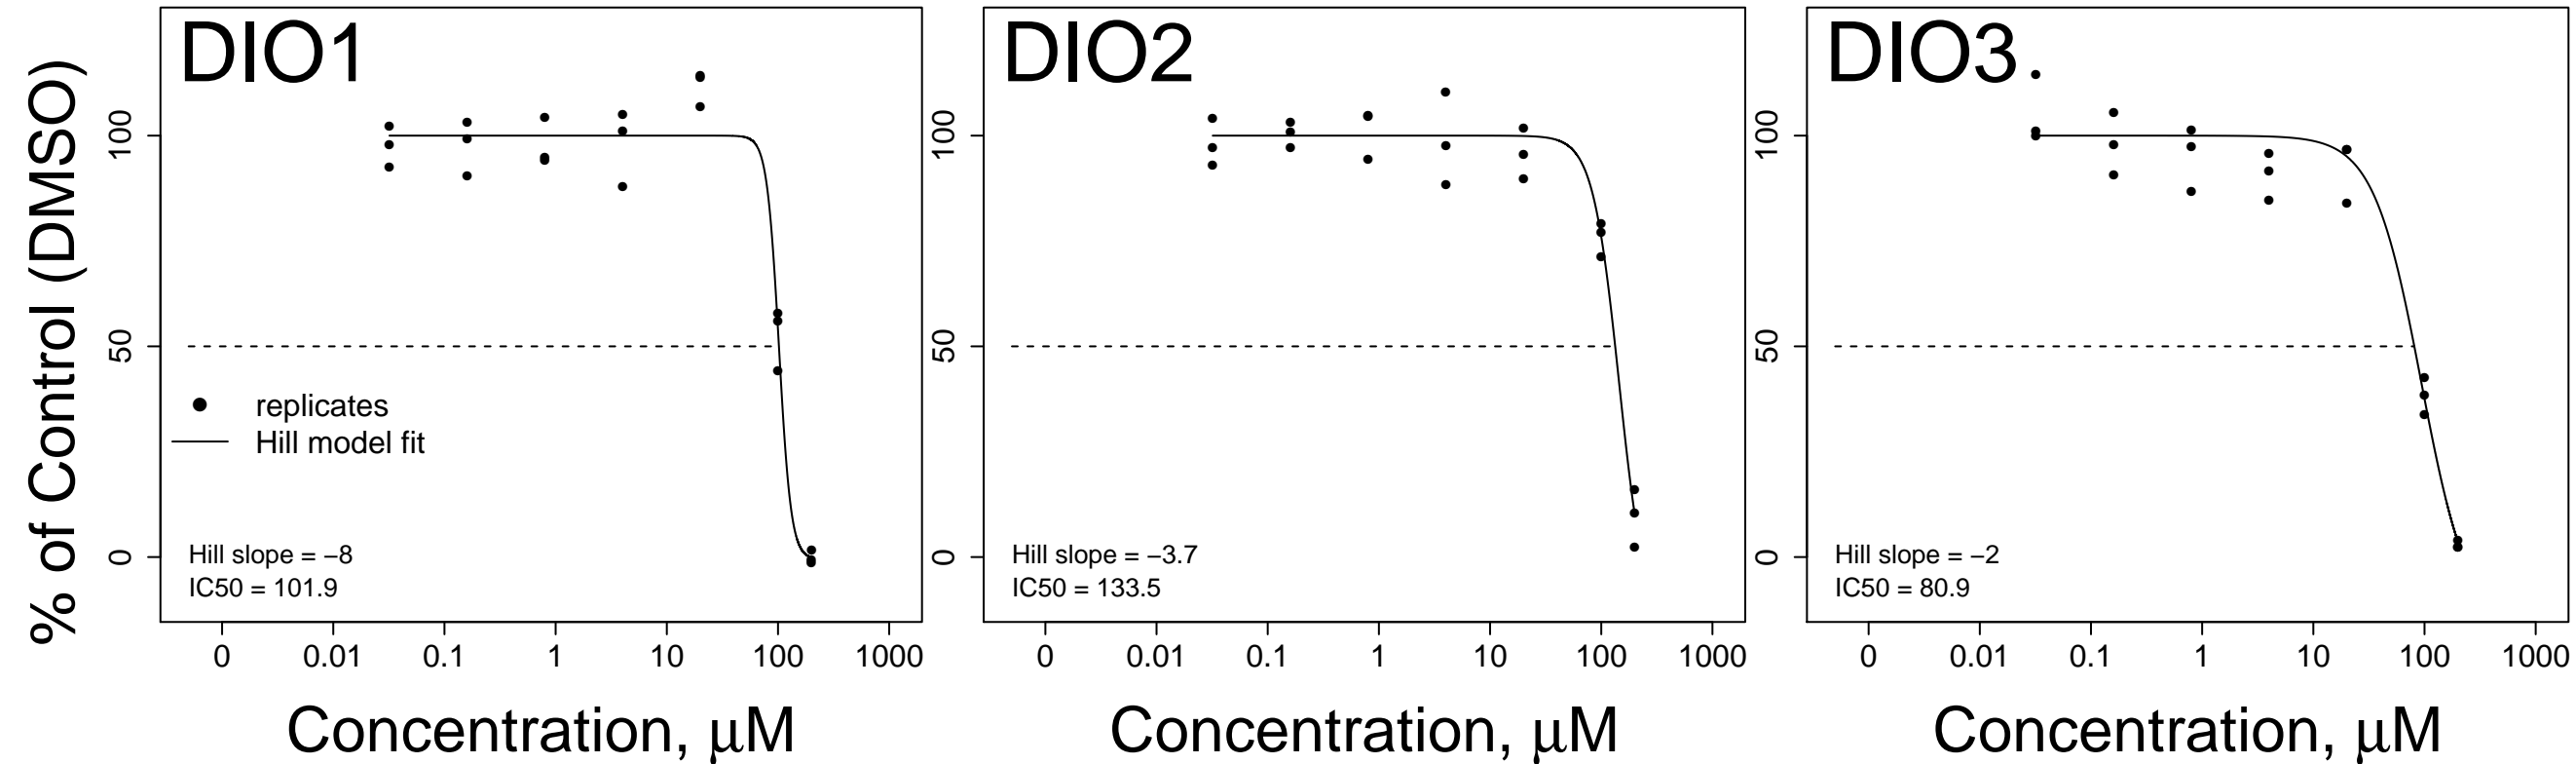

# 4-Nonylphenol CASRN: 104-40-5

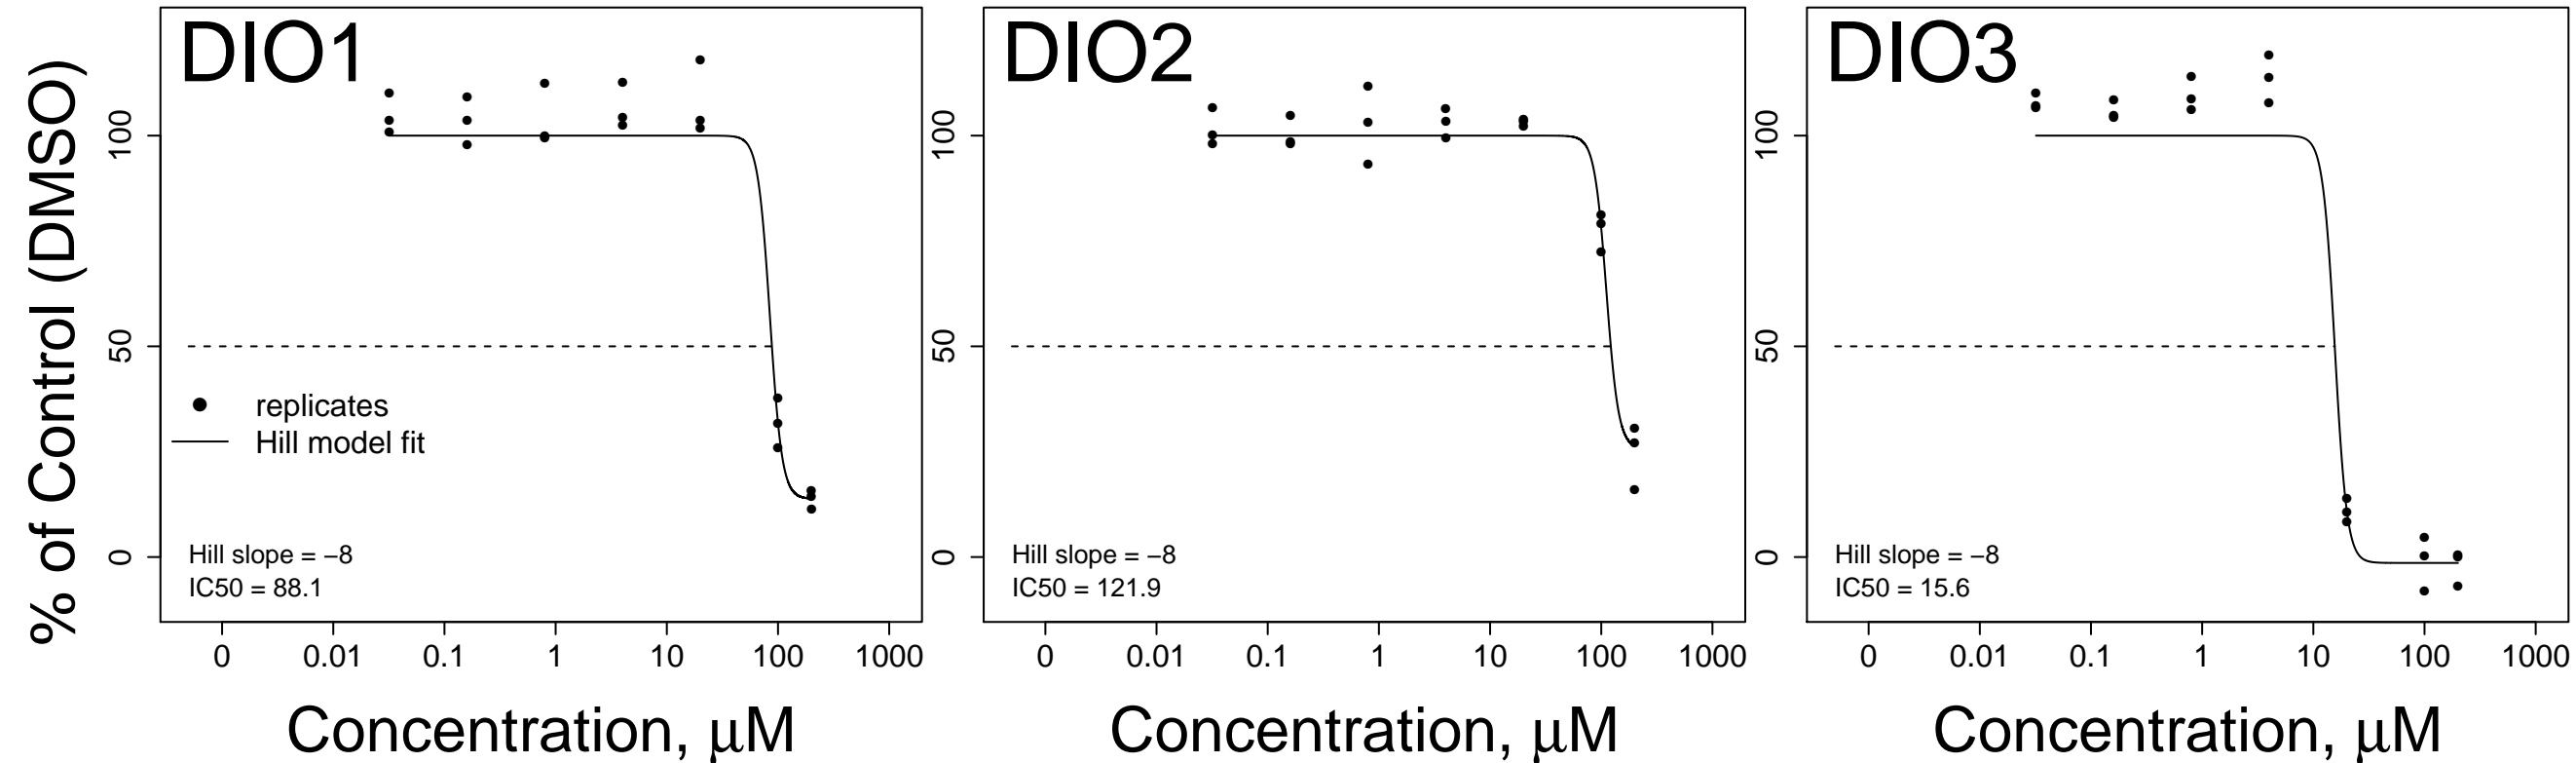

Tamoxifen CASRN: 10540-29-1

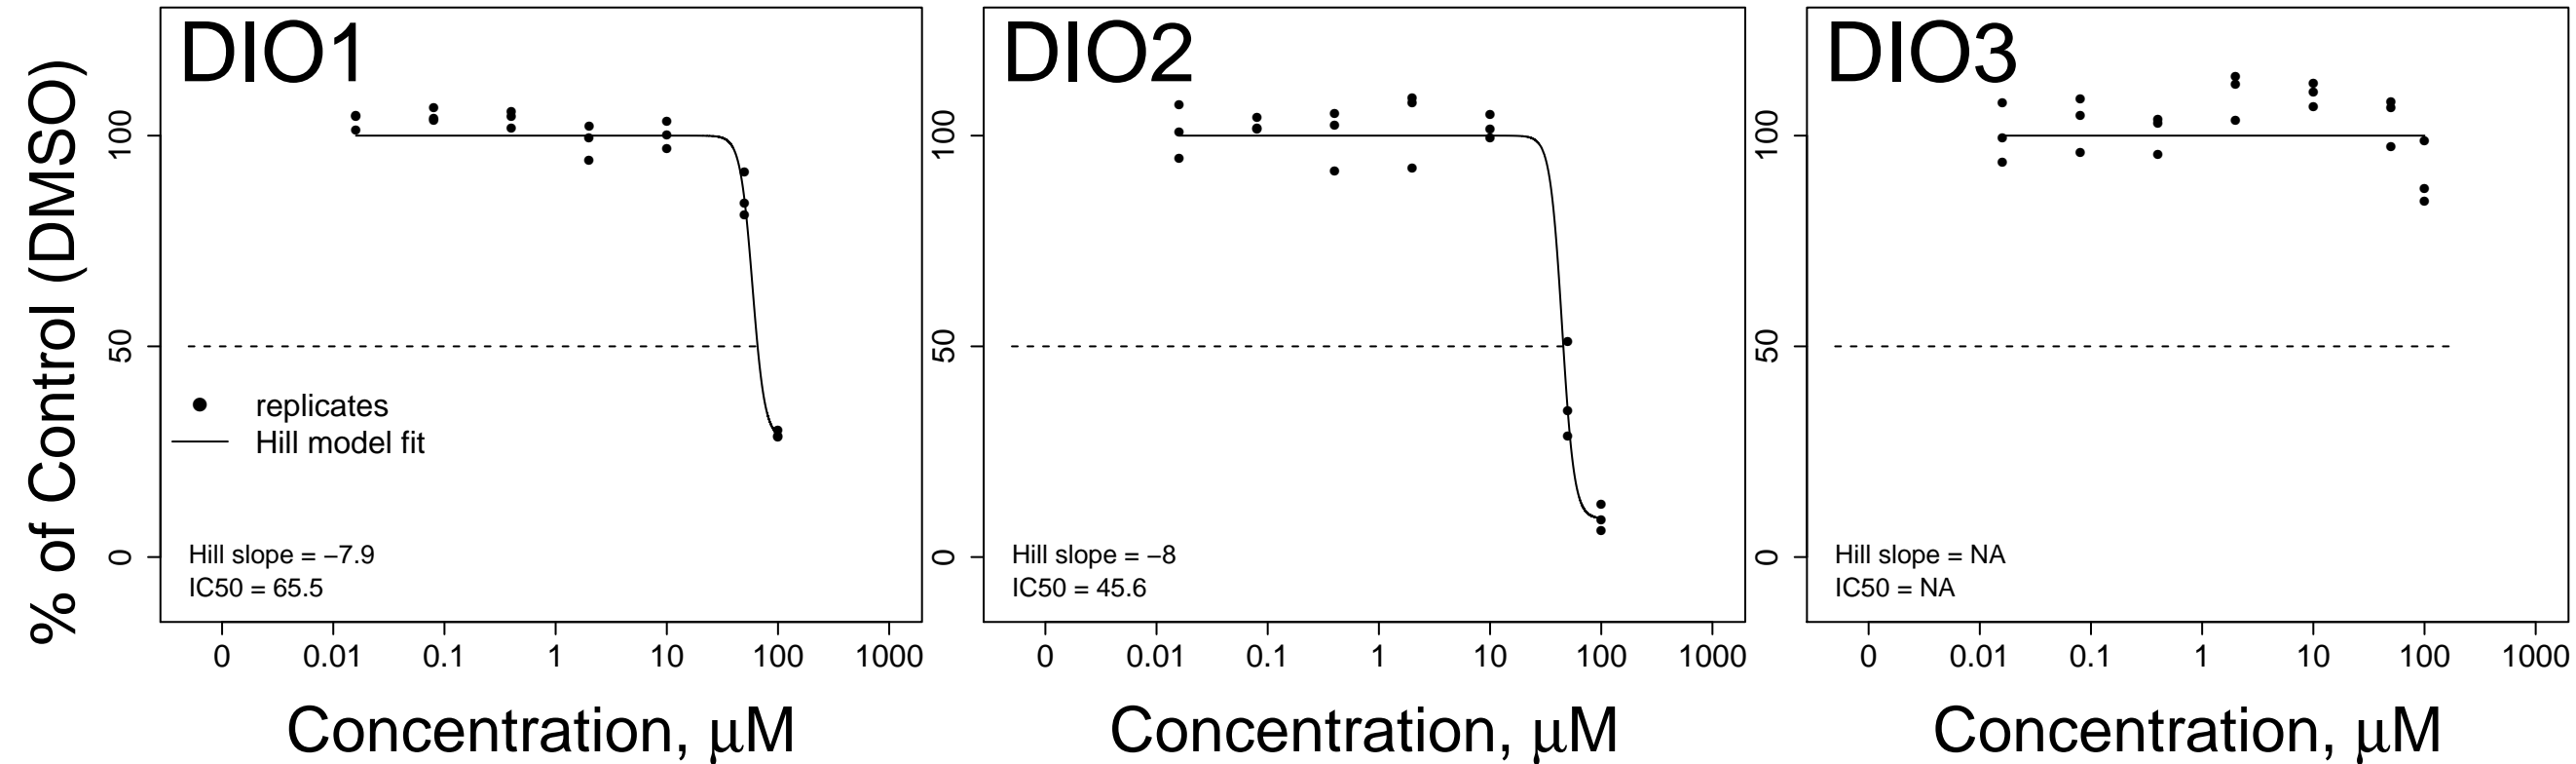

PharmaGSID\_47337 CASRN: 1061517-62-1

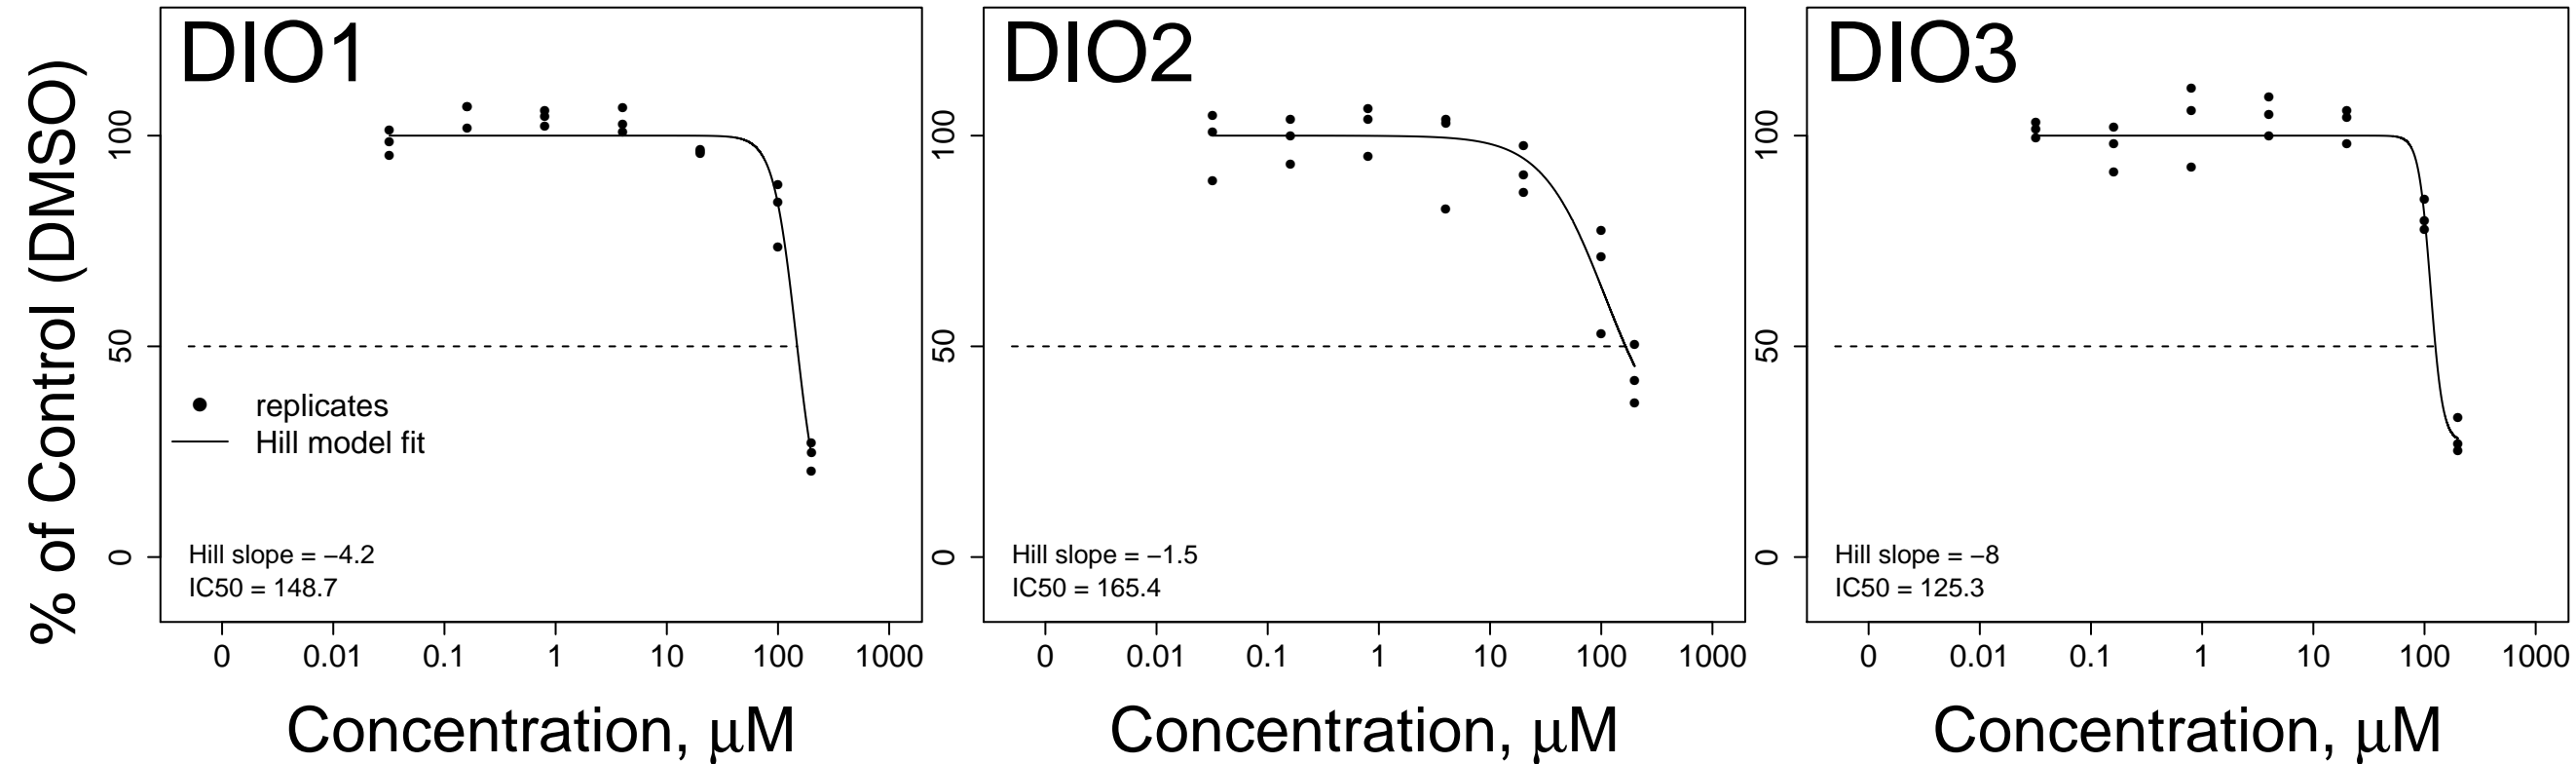



Mepanipyrim CASRN: 110235-47-7

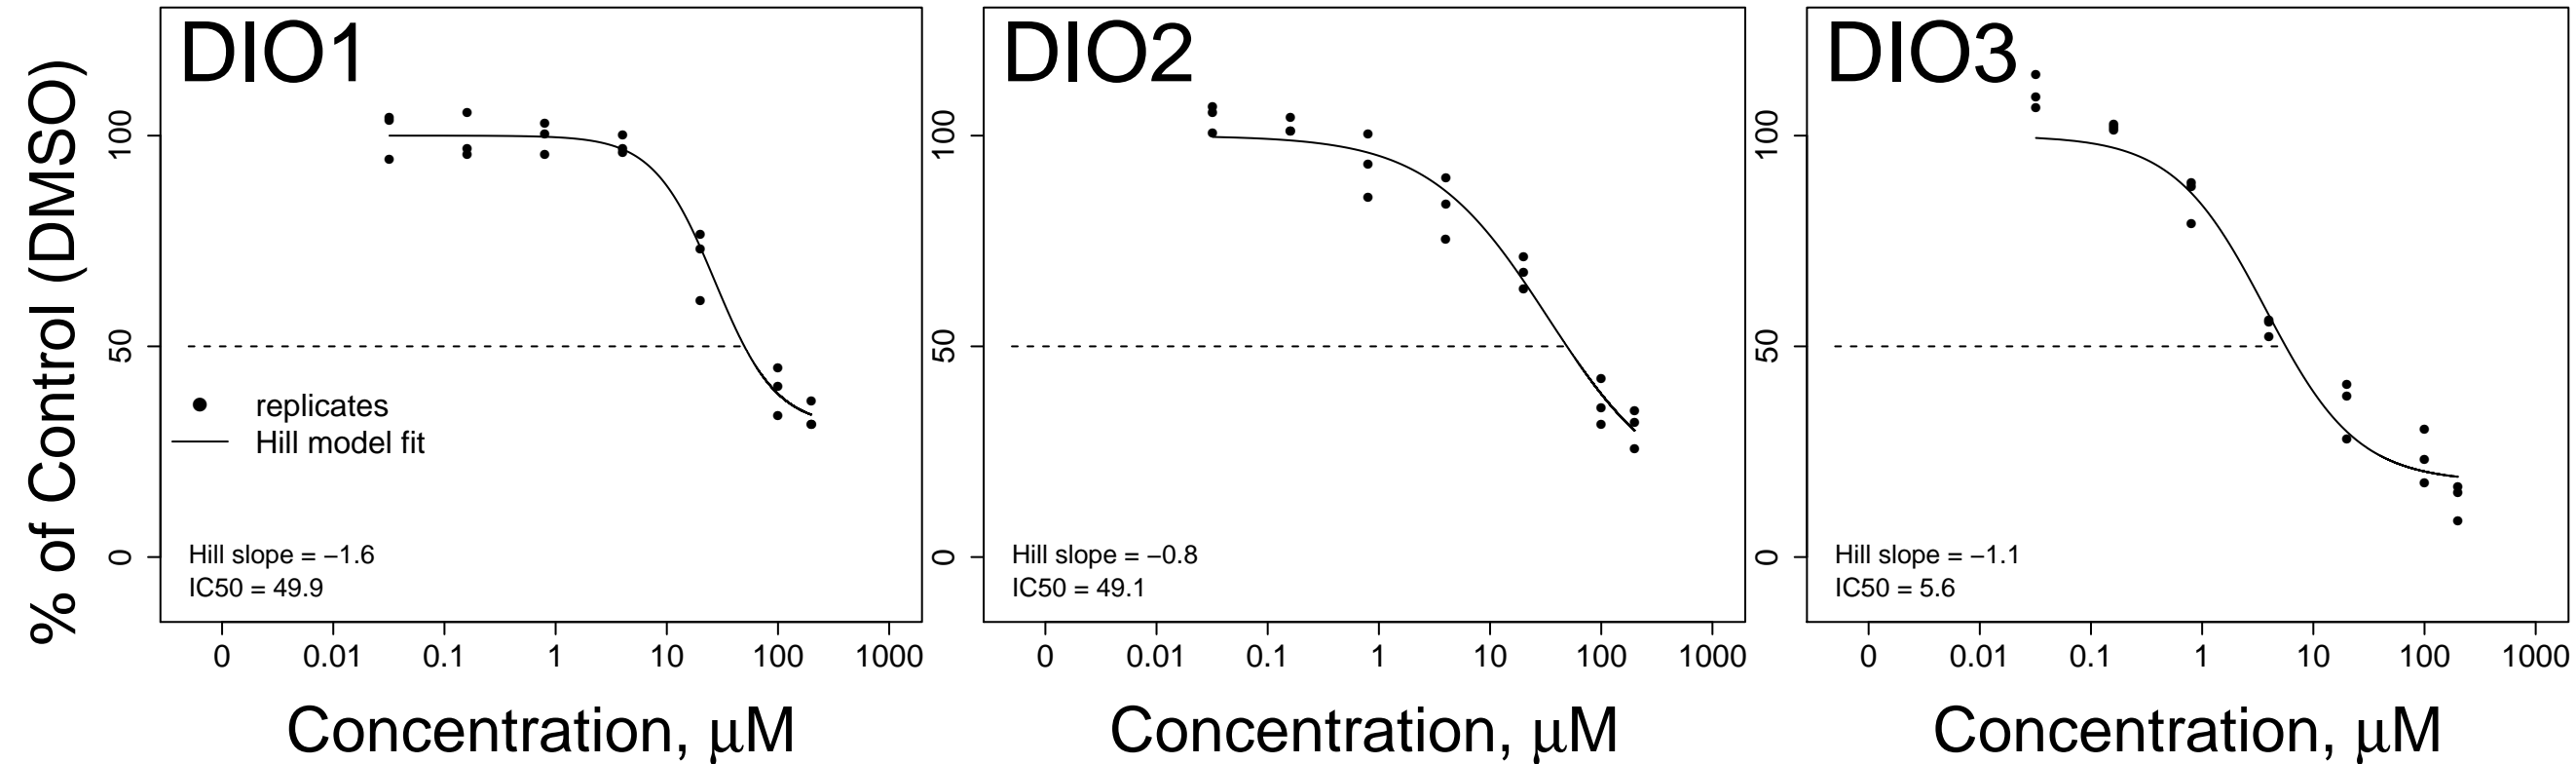

# Glutaraldehyde CASRN: 111-30-8

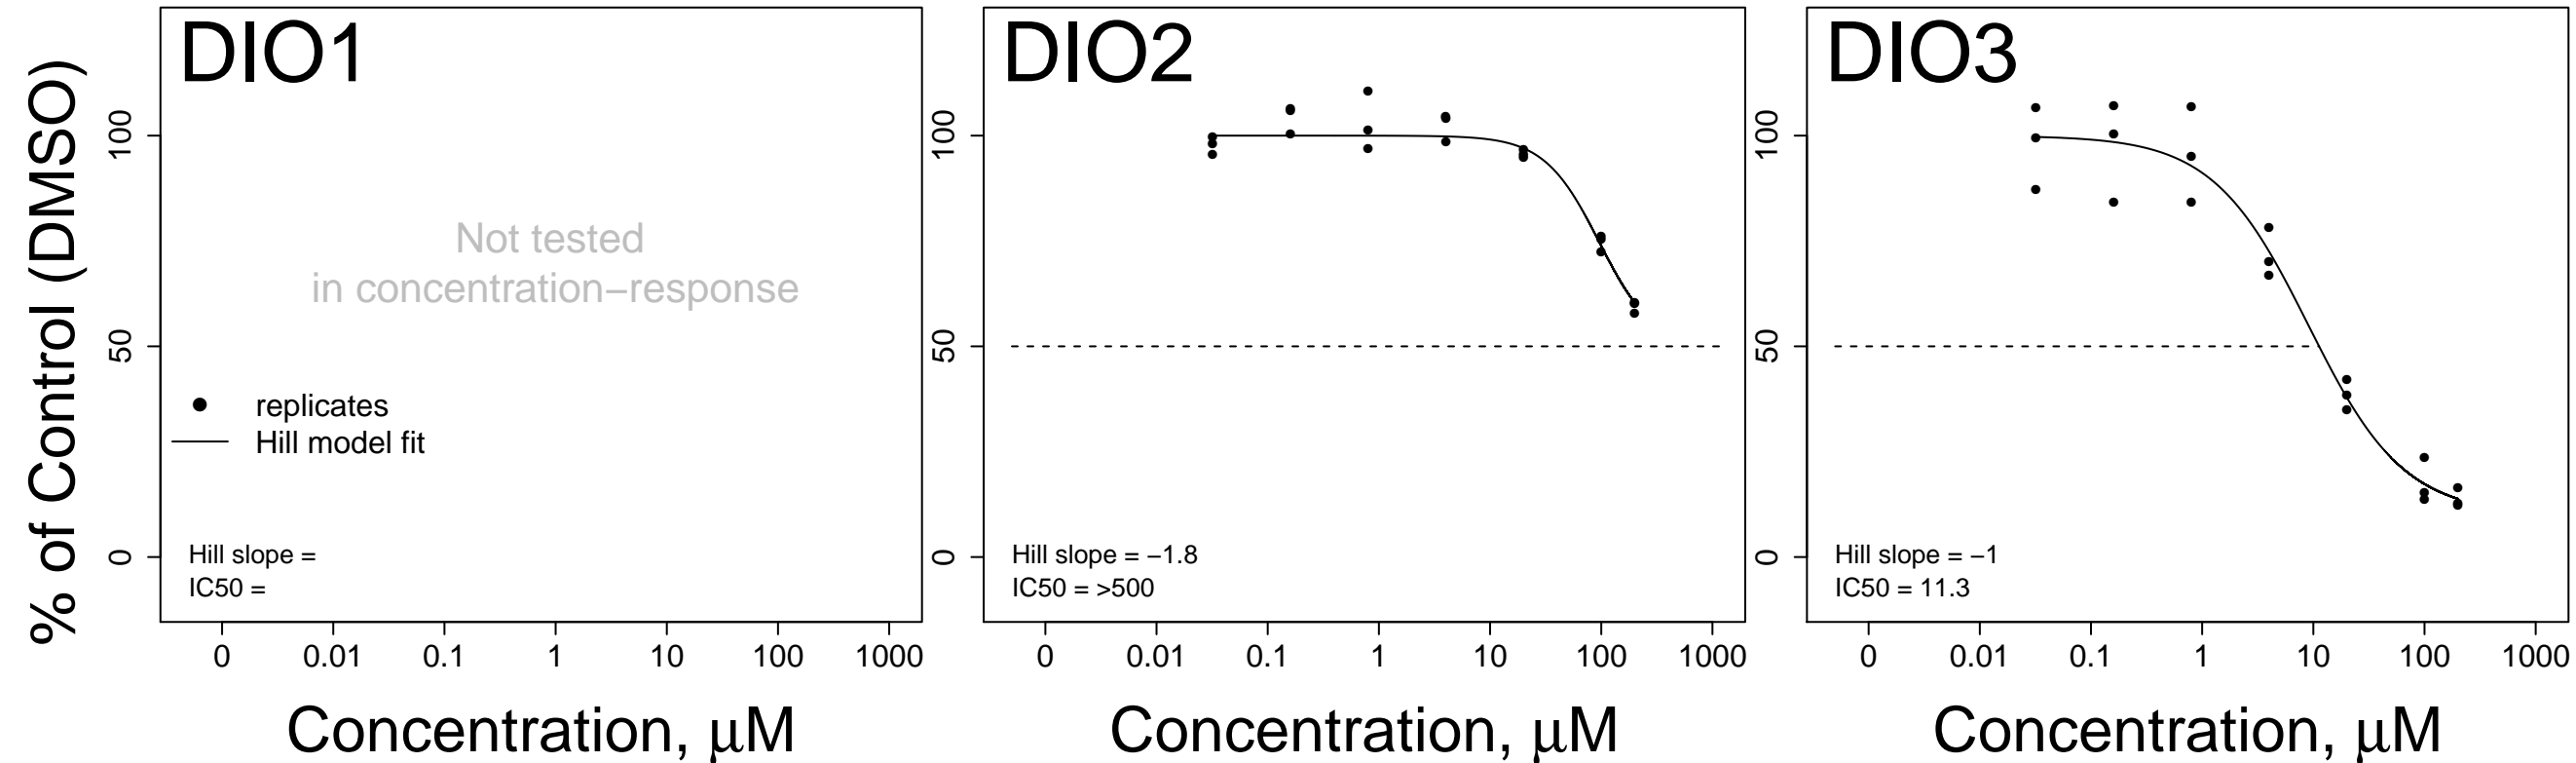

Bis(2-chloroethyl) ether CASRN: 111-44-4

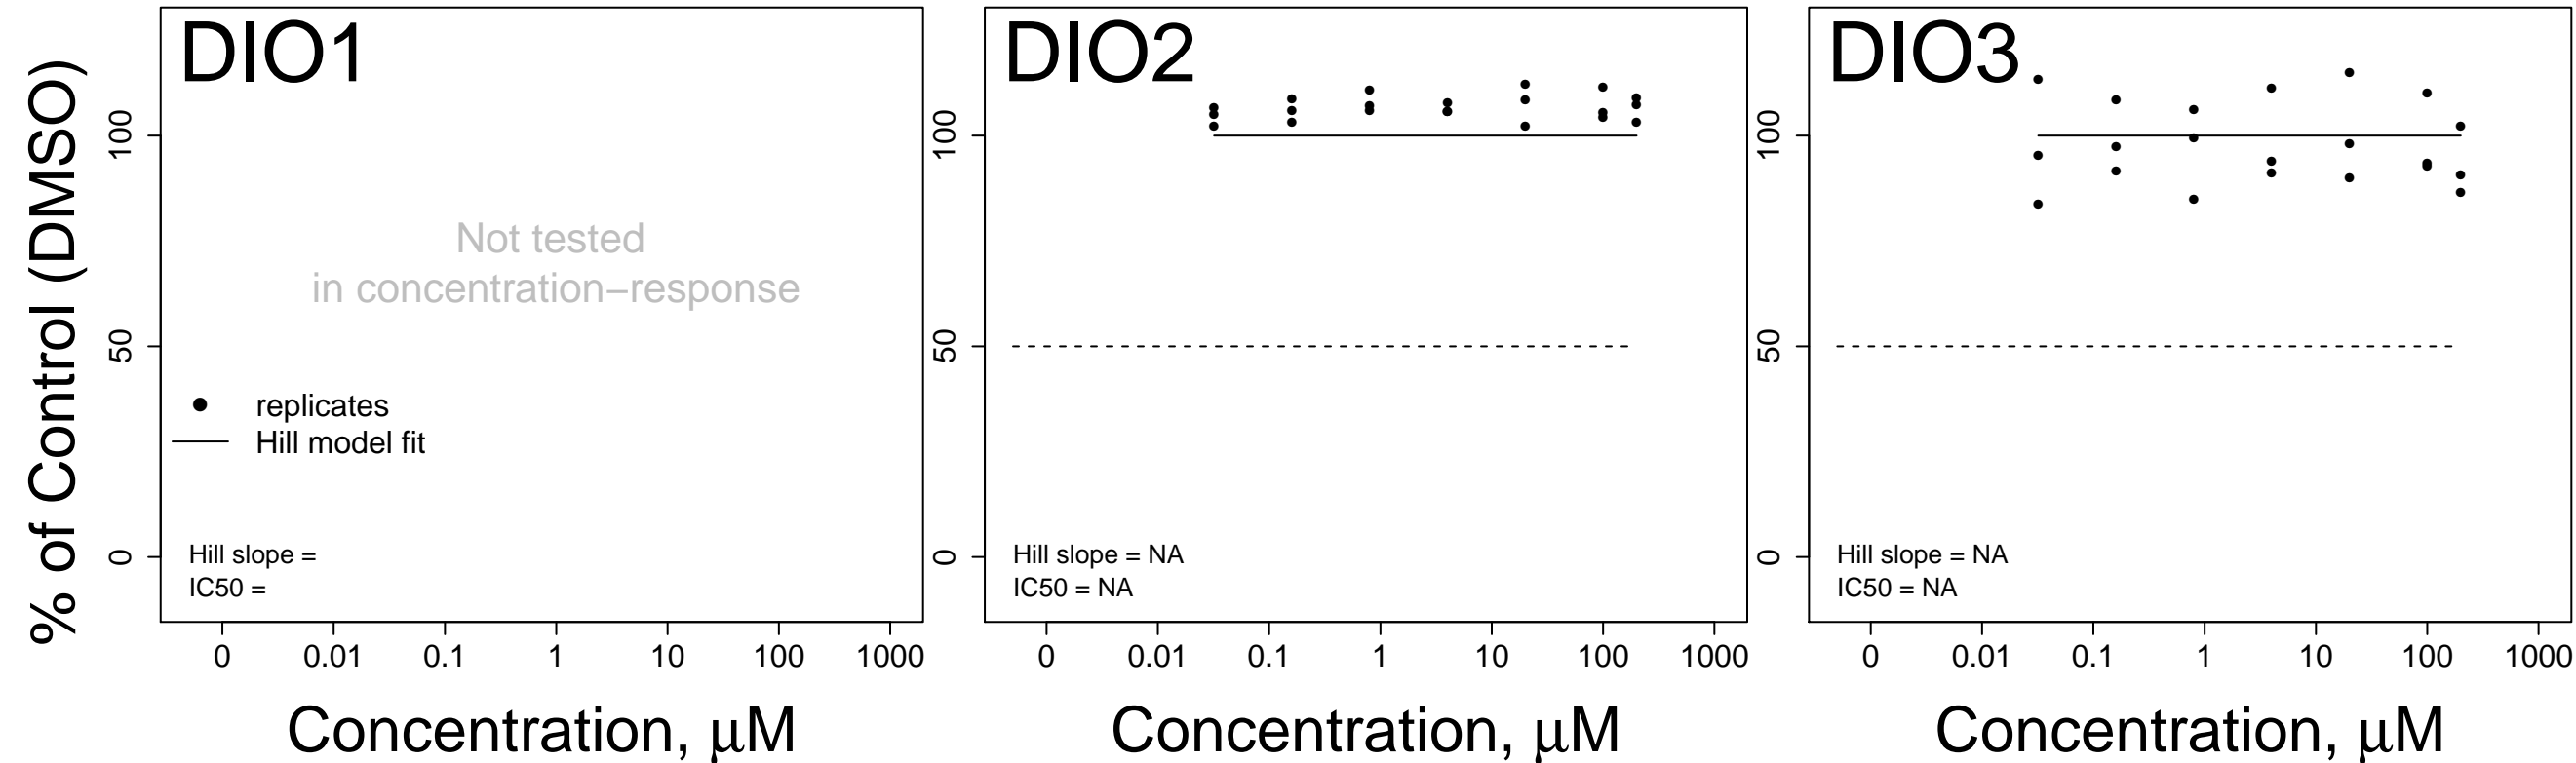

Dodecyltrimethylammonium chloride CASRN: 112-00-5

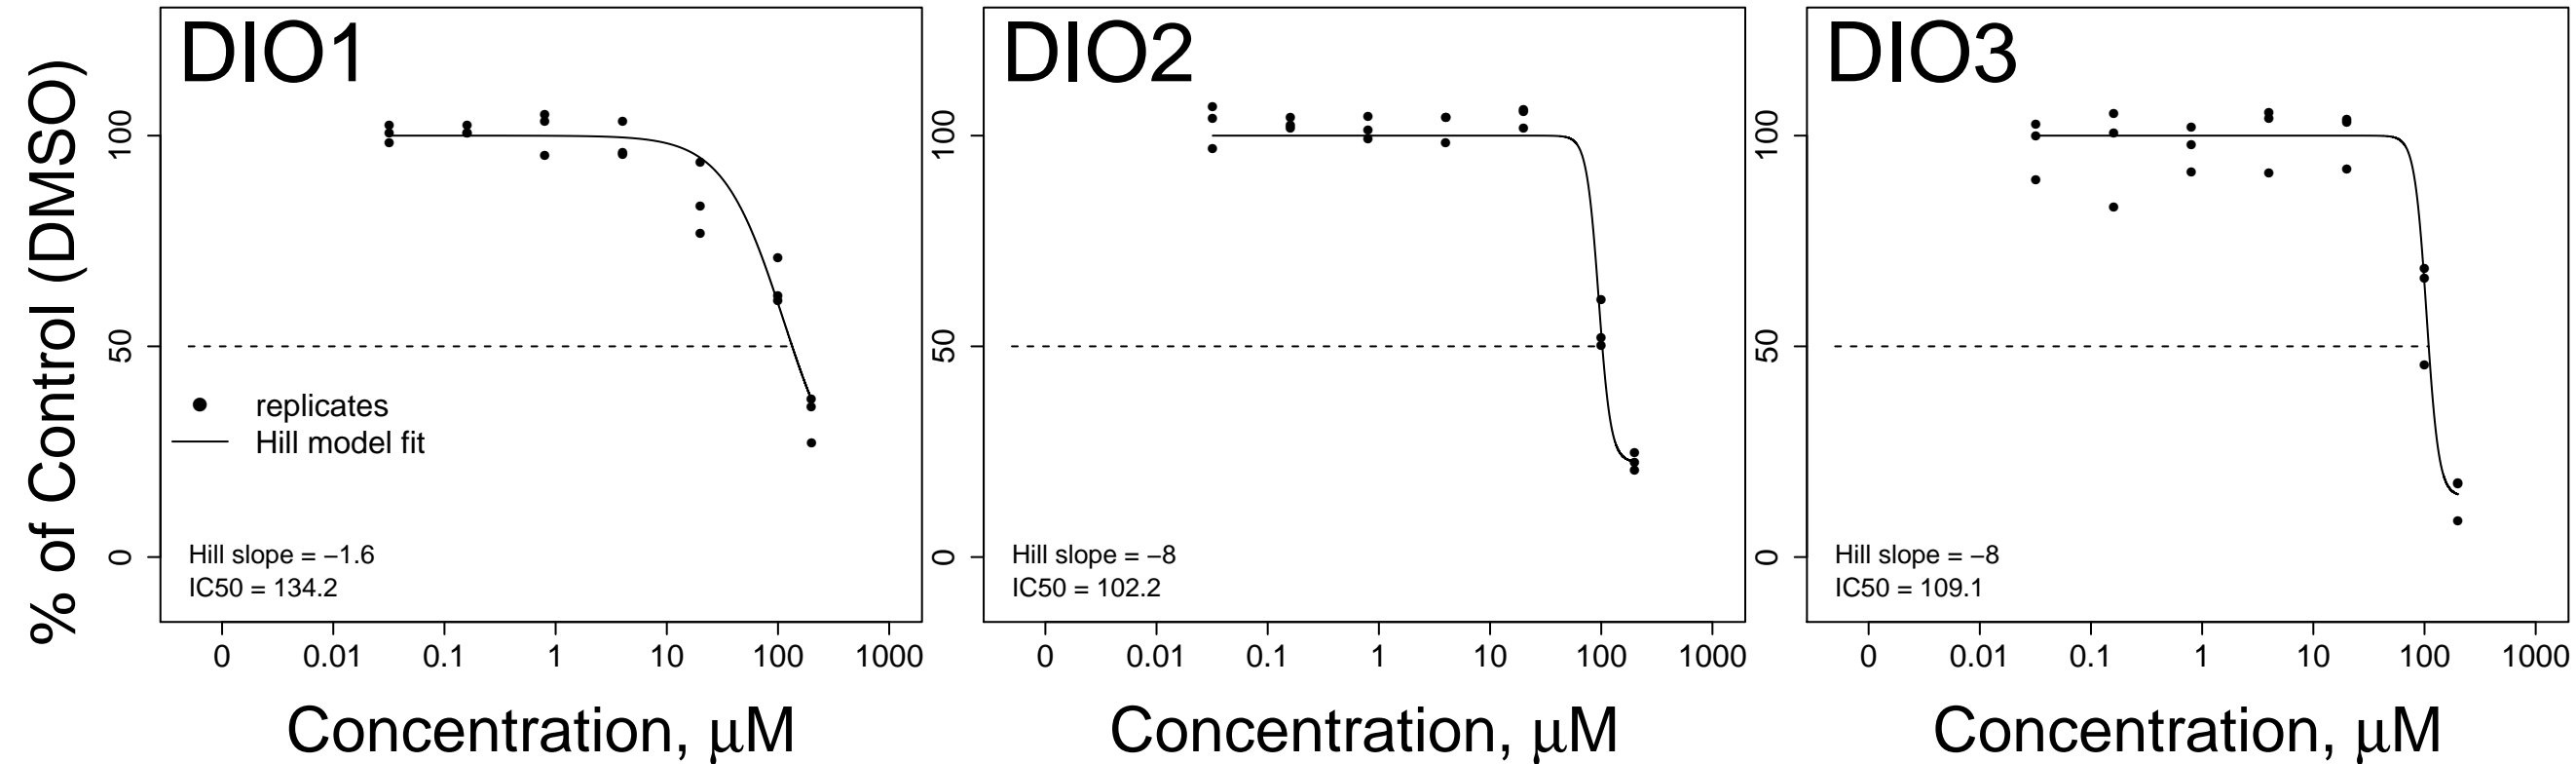

# 1-Undecanol CASRN: 112-42-5

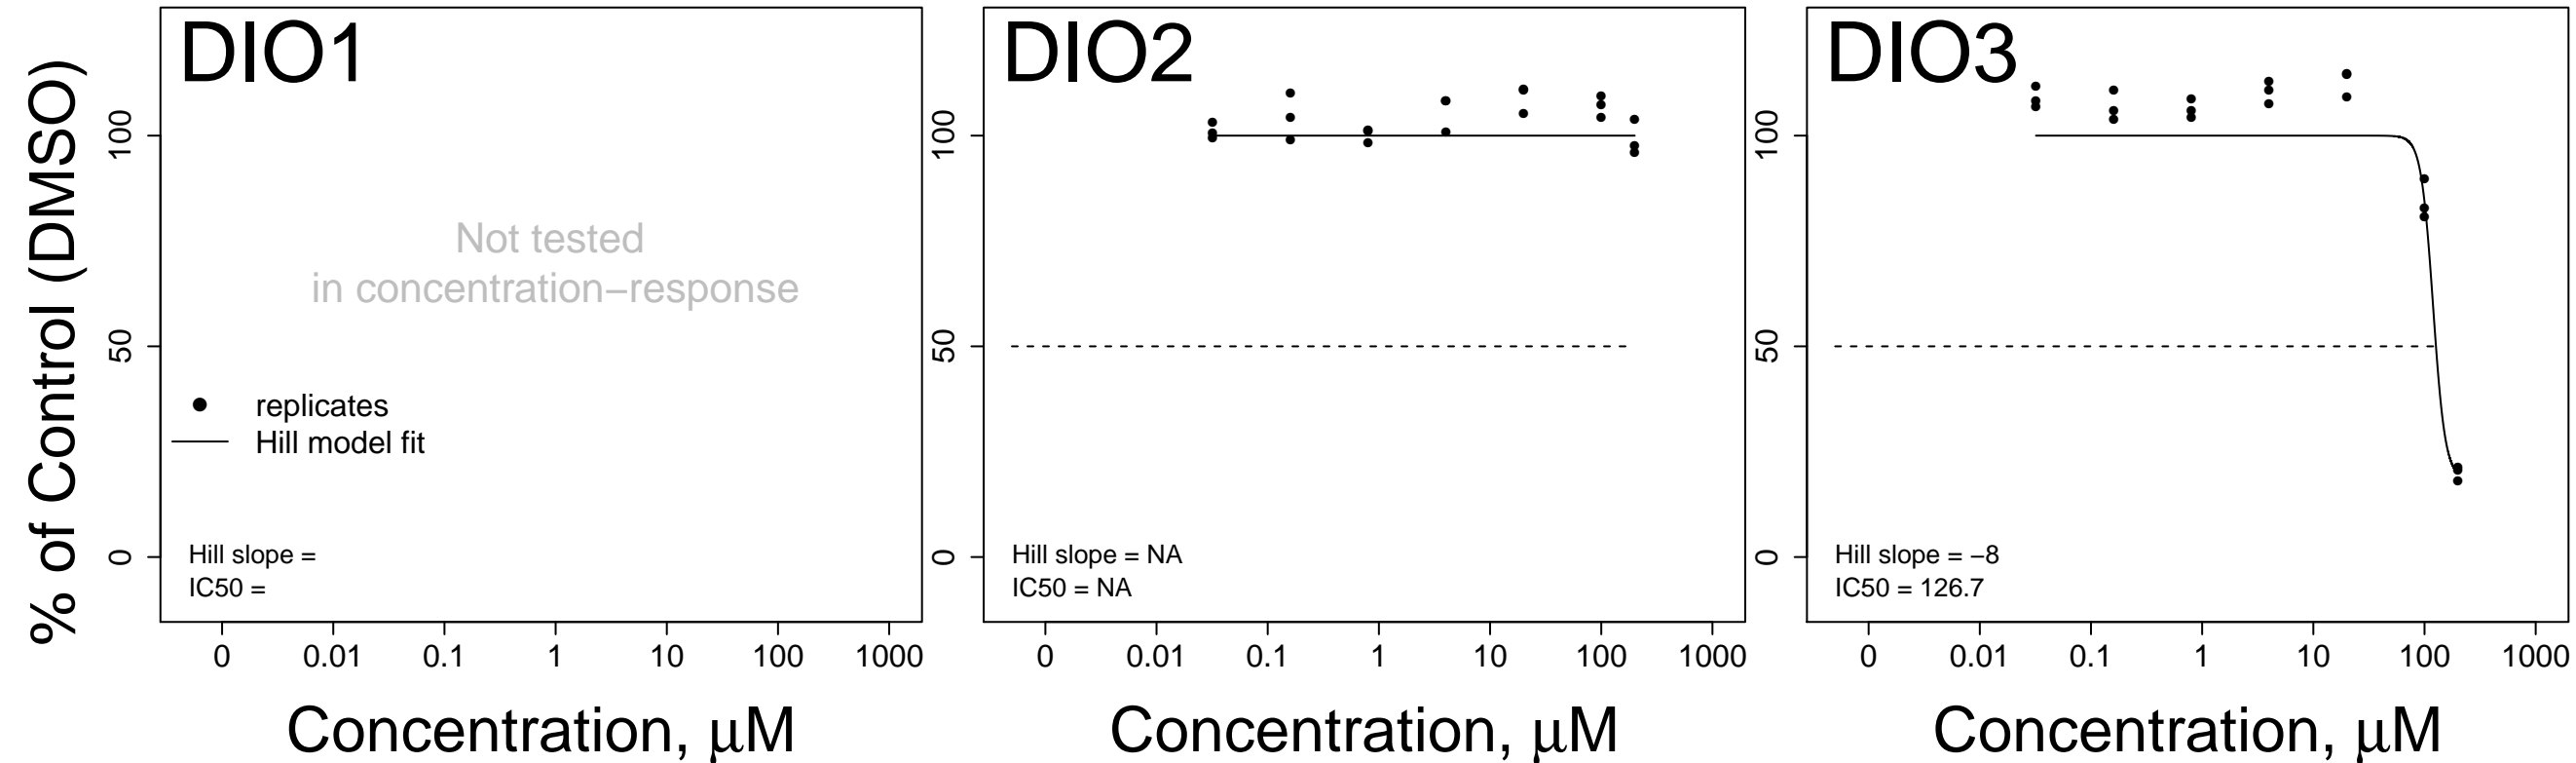

1-Dodecanol CASRN: 112-53-8

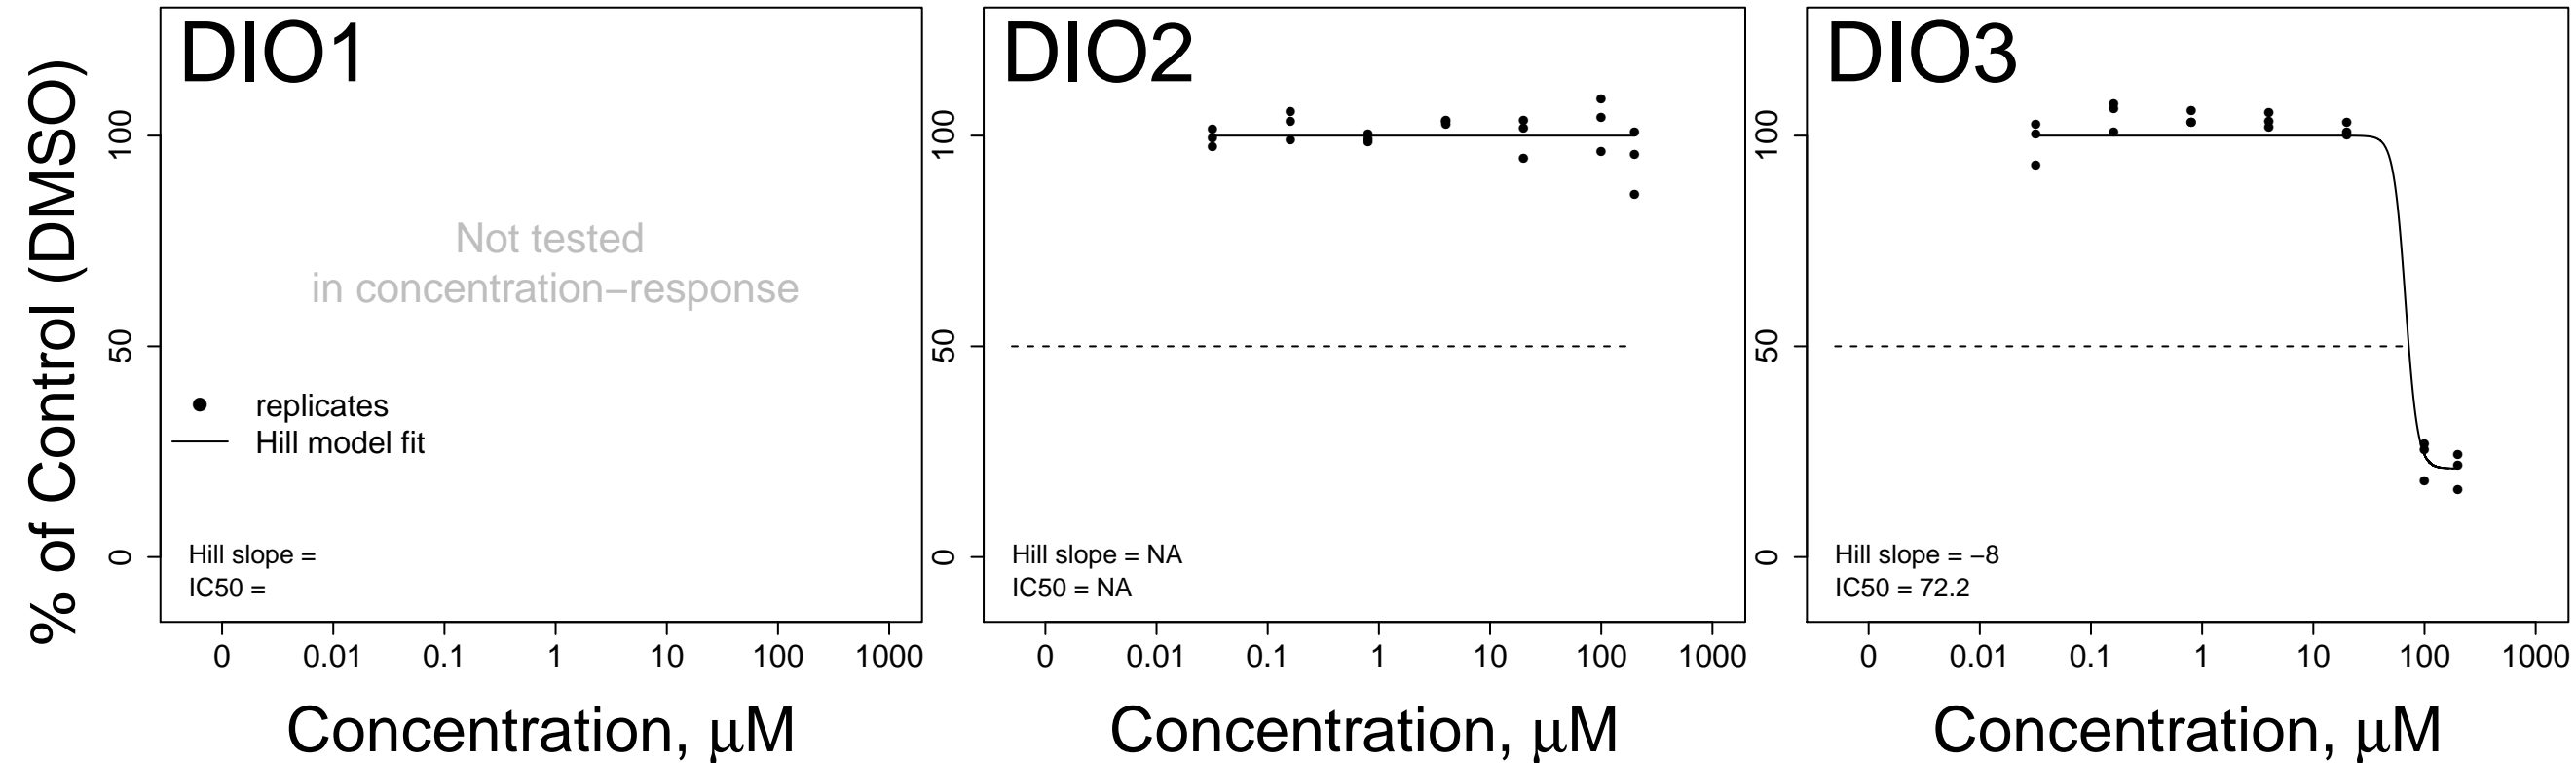

DIO1

DIO2

DIO3

Not tested  
in concentration-response

● replicates  
— Hill model fit

Hill slope =  
IC50 =

Hill slope = NA  
IC50 = NA

Hill slope = -8  
IC50 = 72.2

1-Tridecanol CASRN: 112-70-9

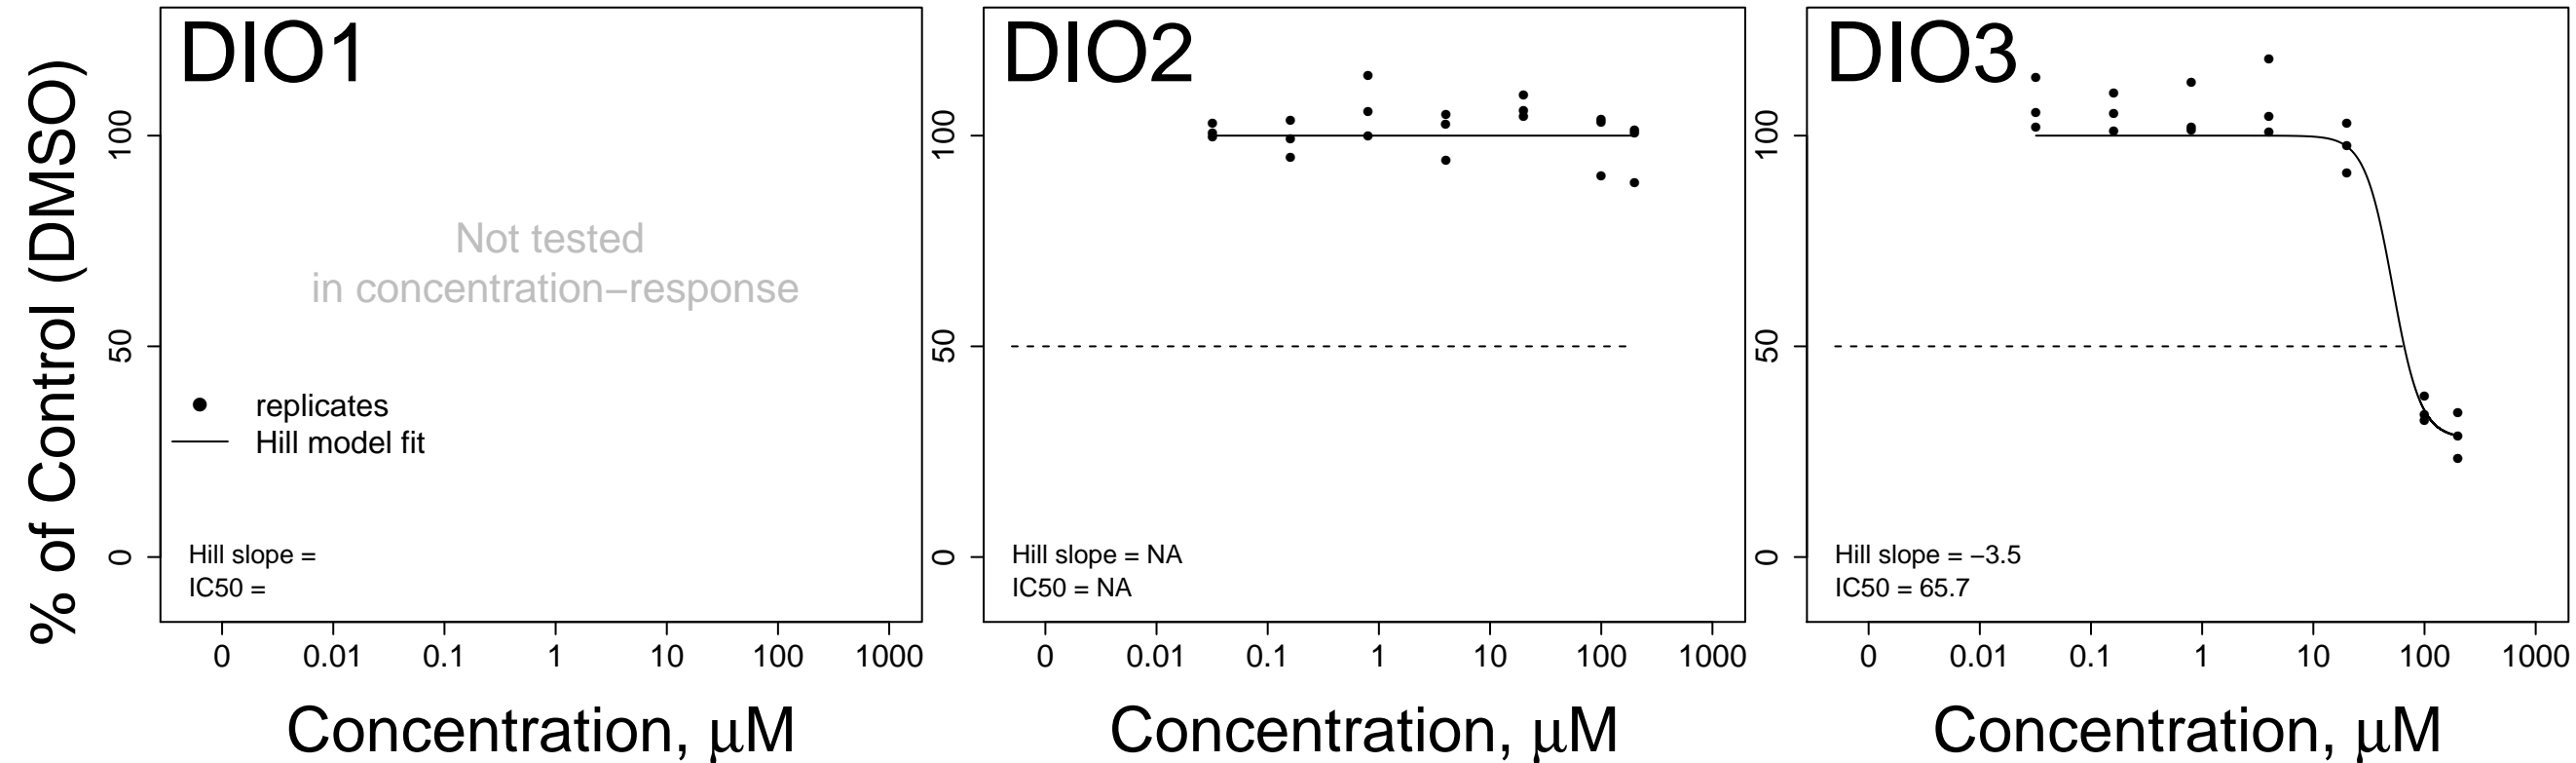

Sodium hexyldecyl sulfate CASRN: 1120-01-0

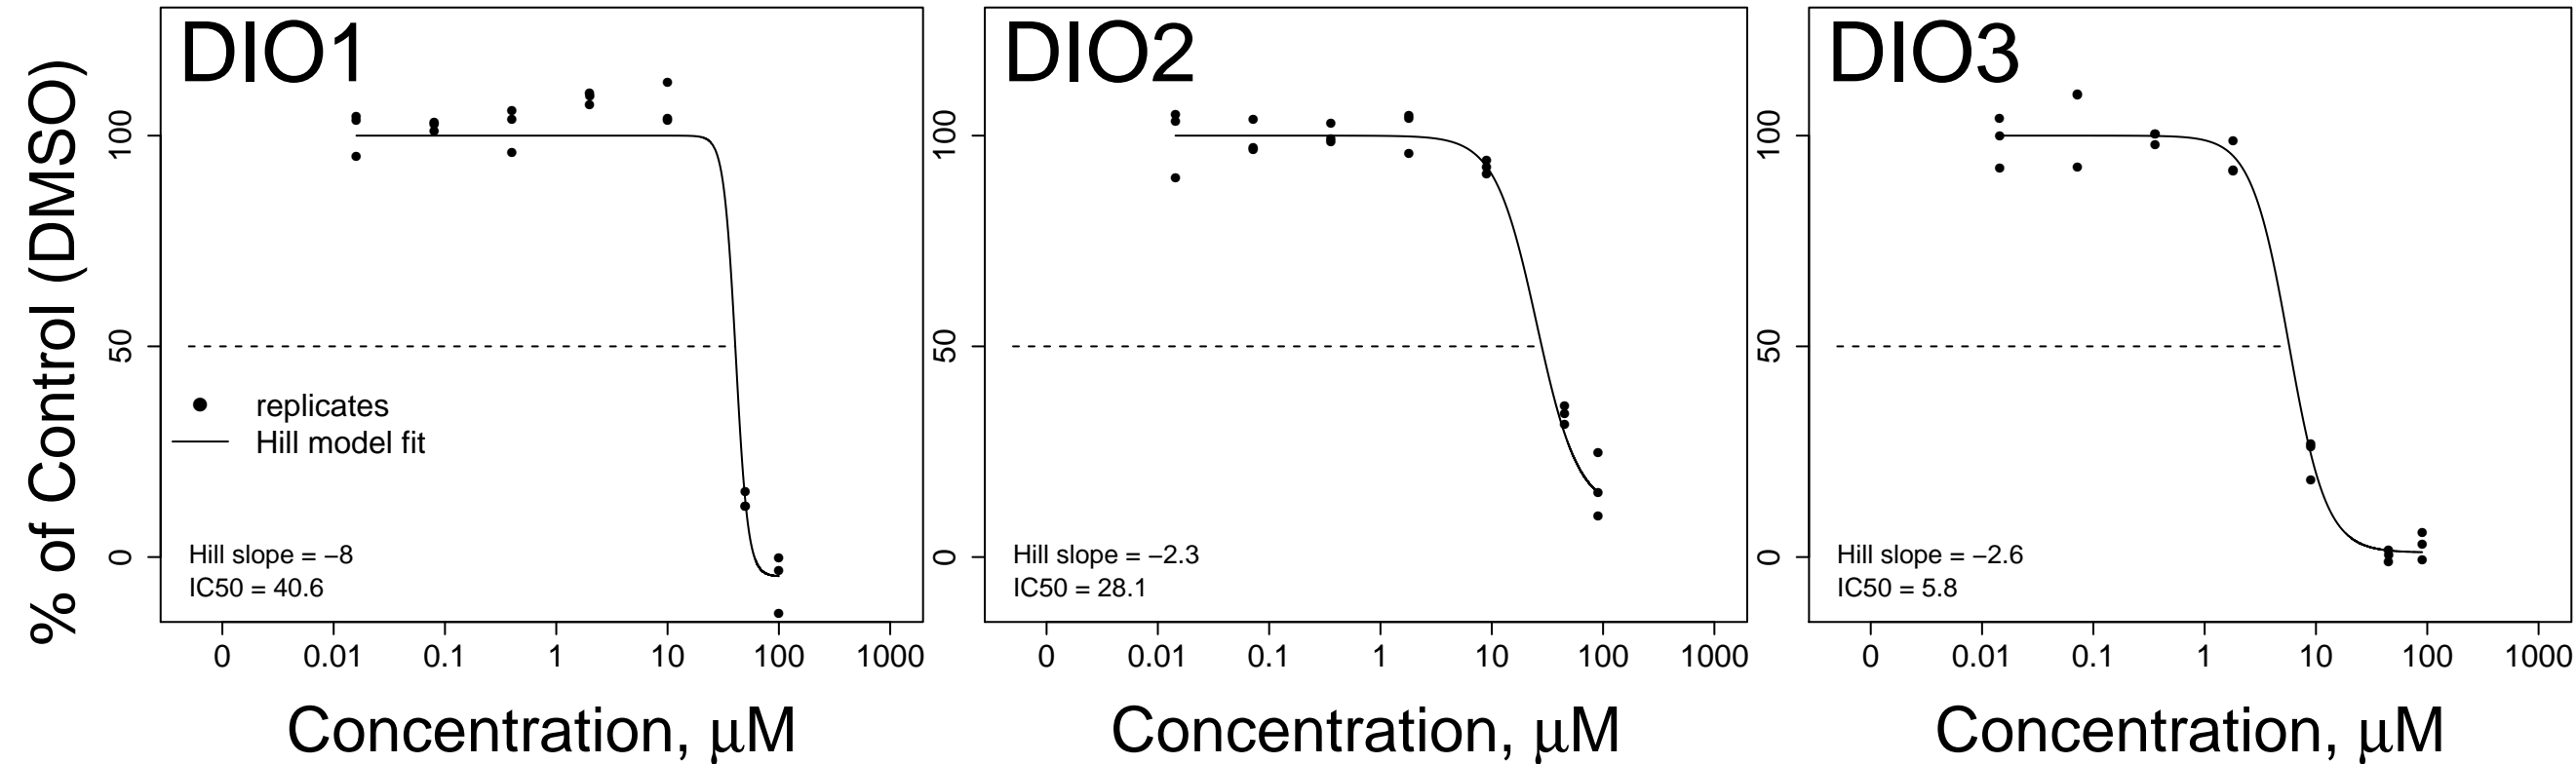



Sodium myristyl sulfate CASRN: 1191-50-0

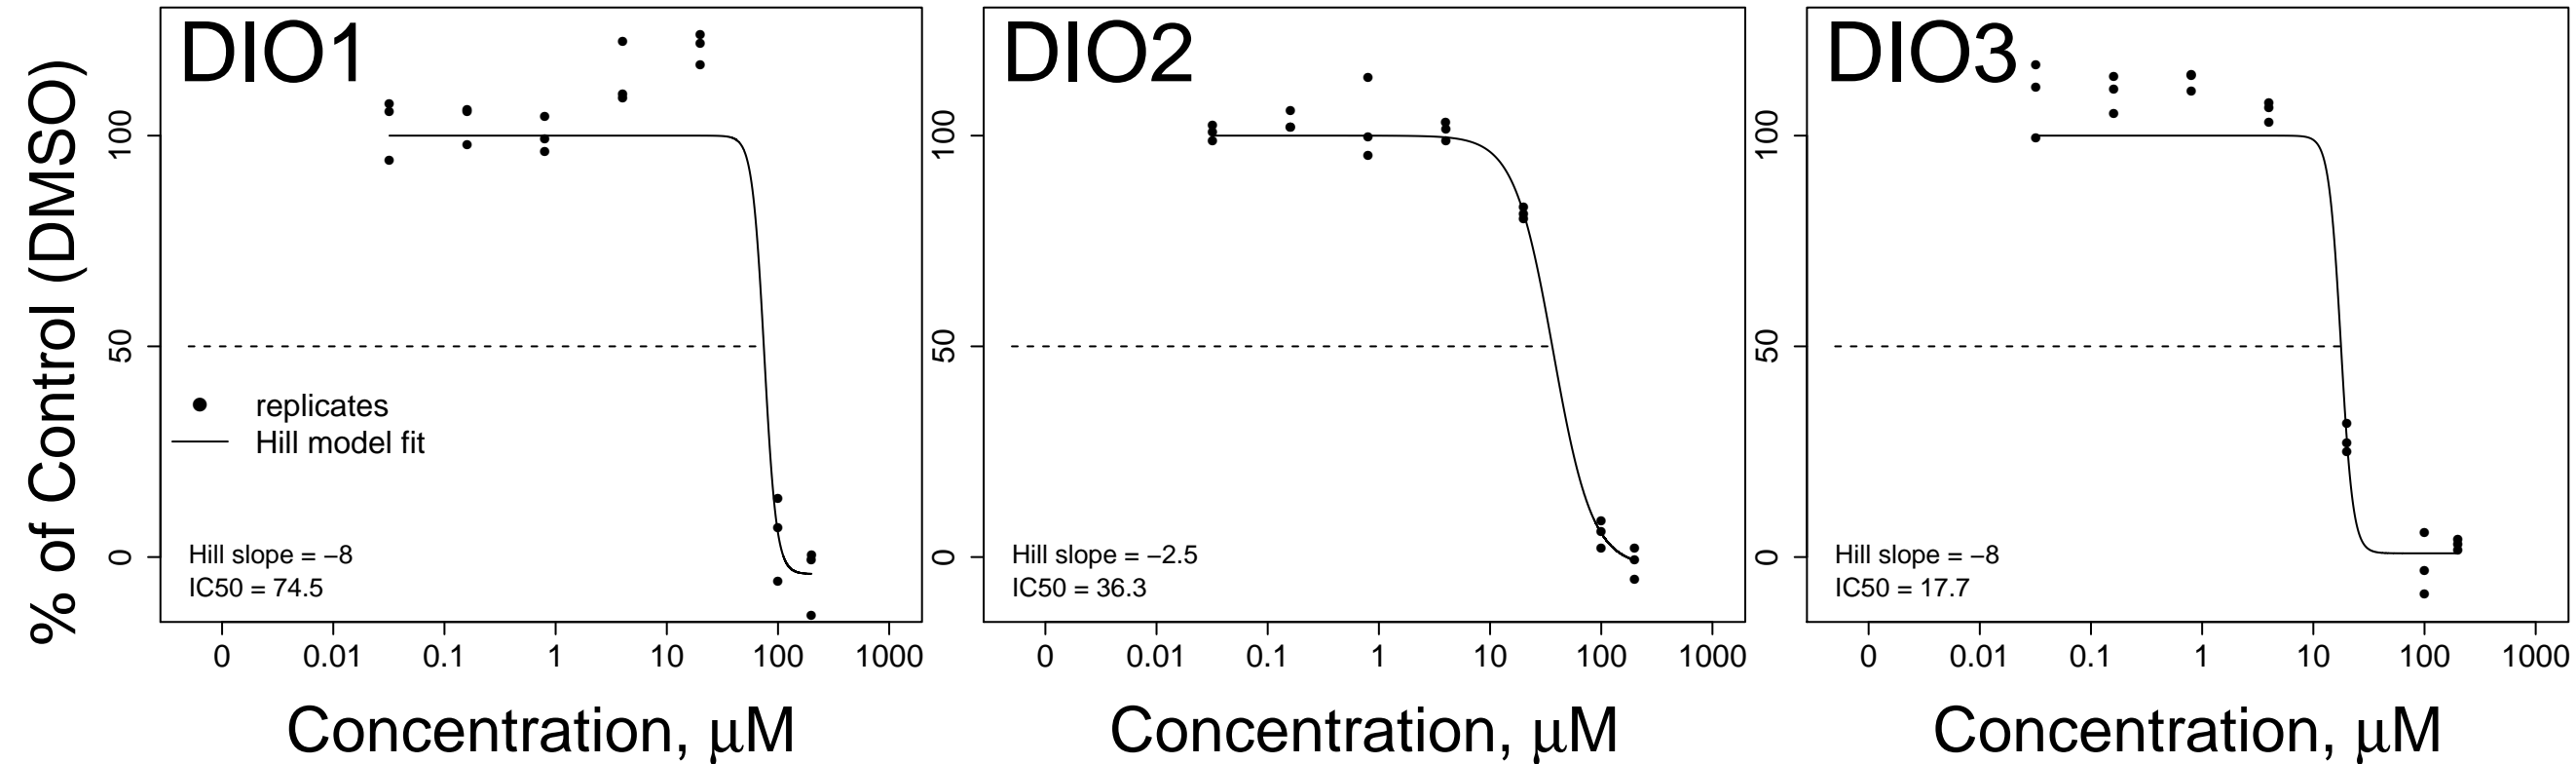

2,4-Bis(2-methylbutan-2-yl)phenol CASRN: 120-95-6

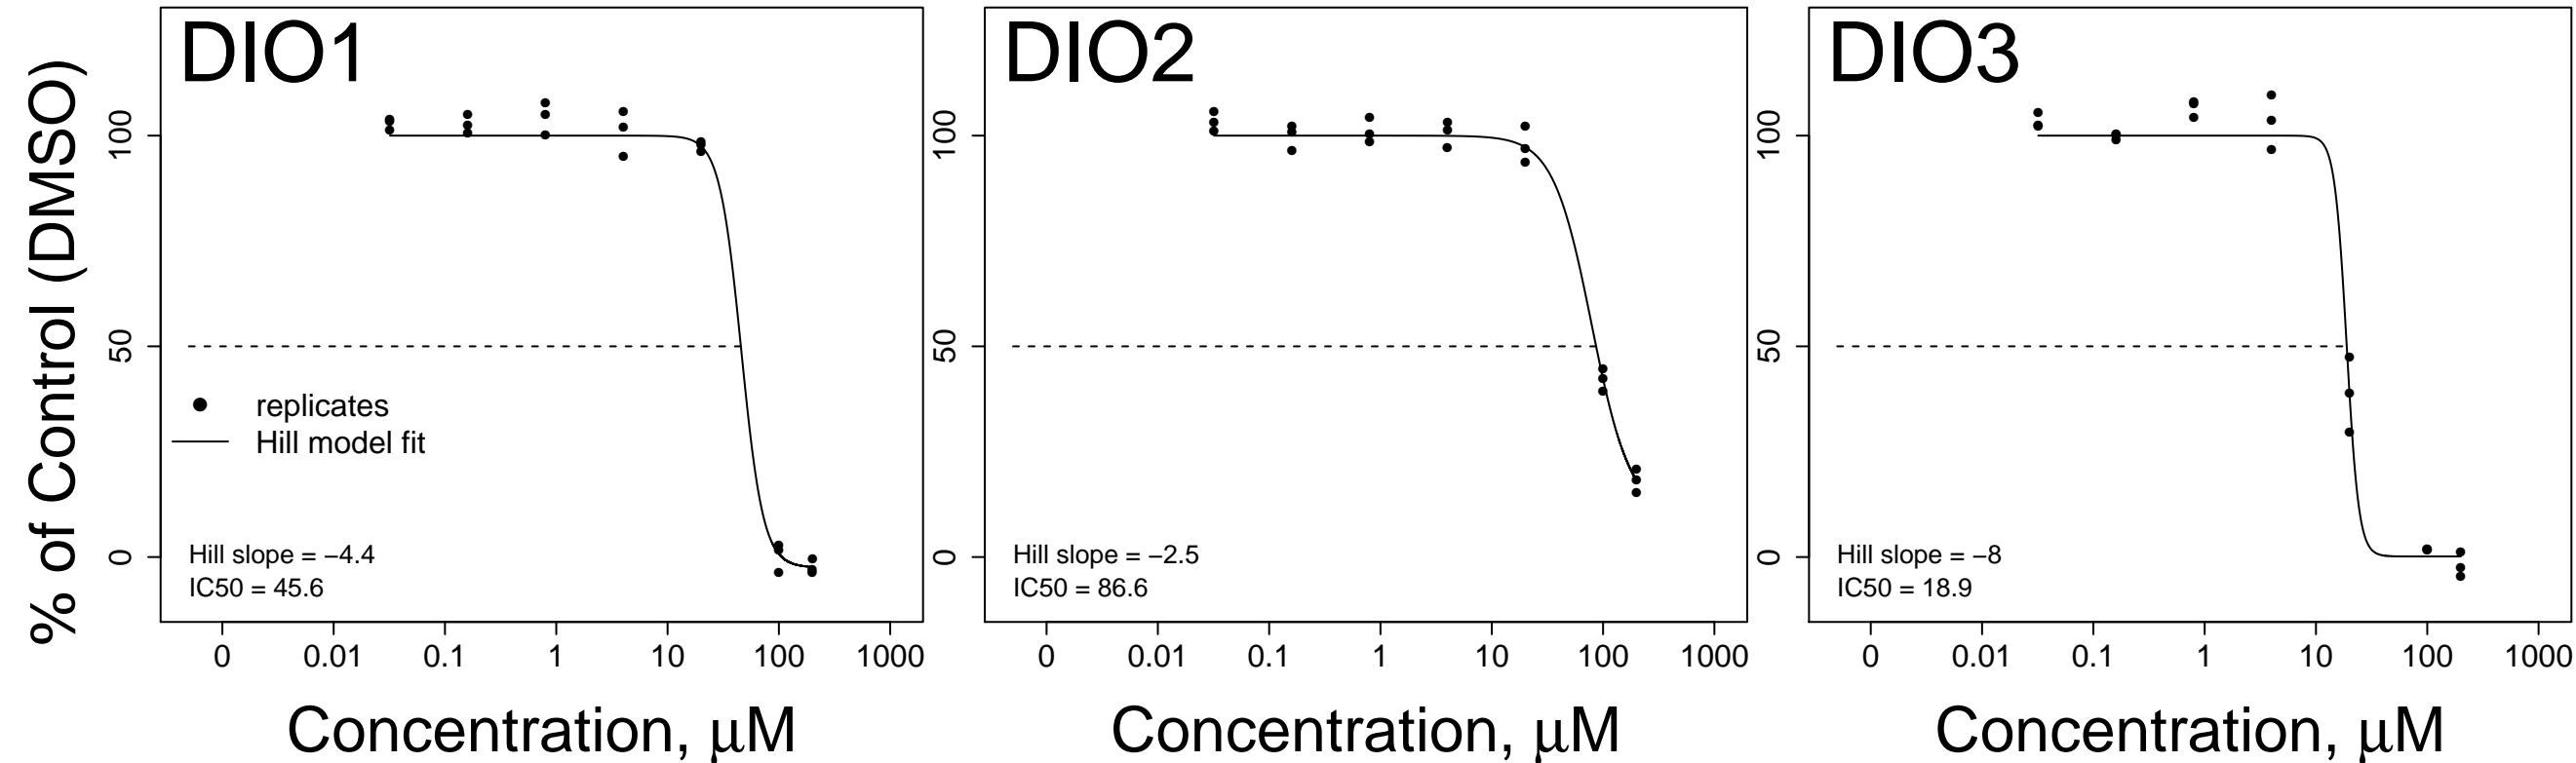

TNP-470 CASRN: 129298-91-5

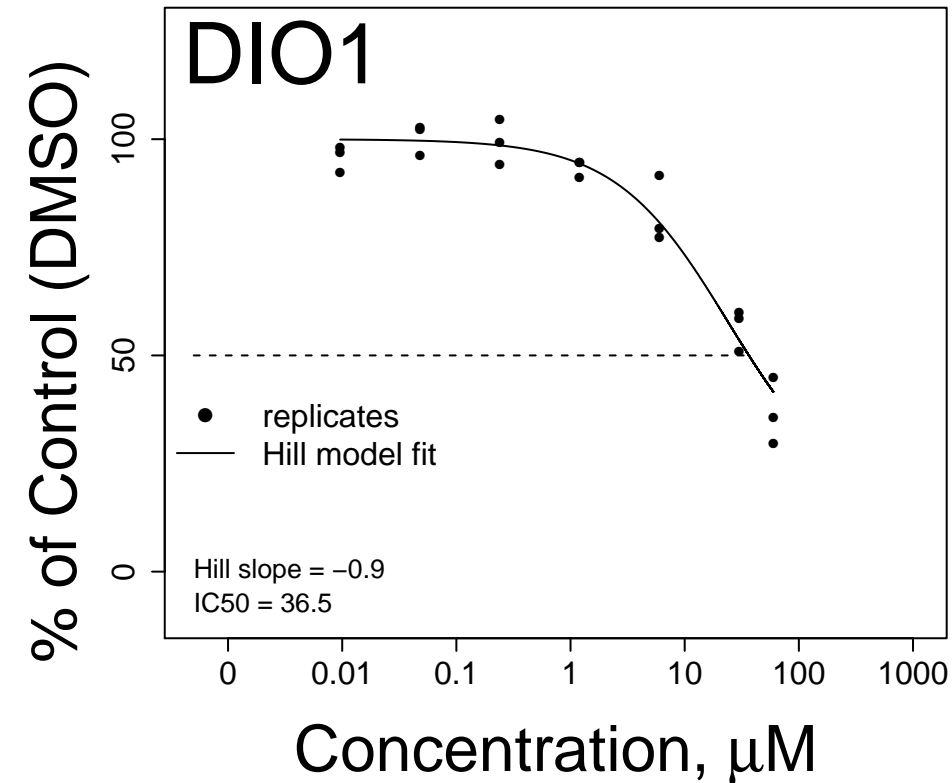

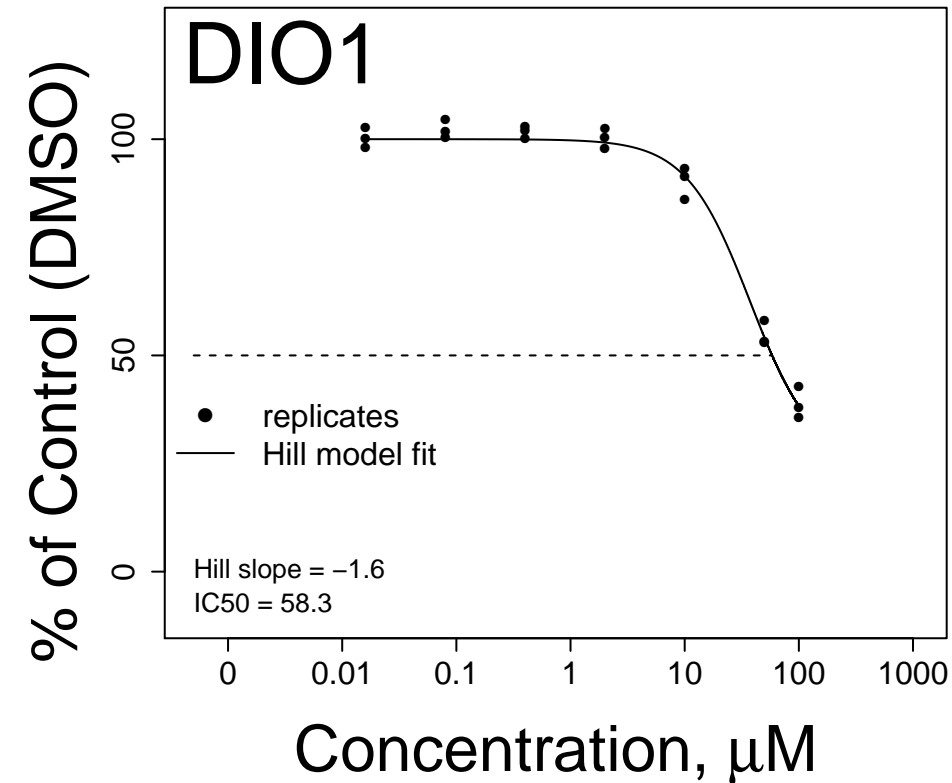

4-Hexylresorcinol CASRN: 136-77-6

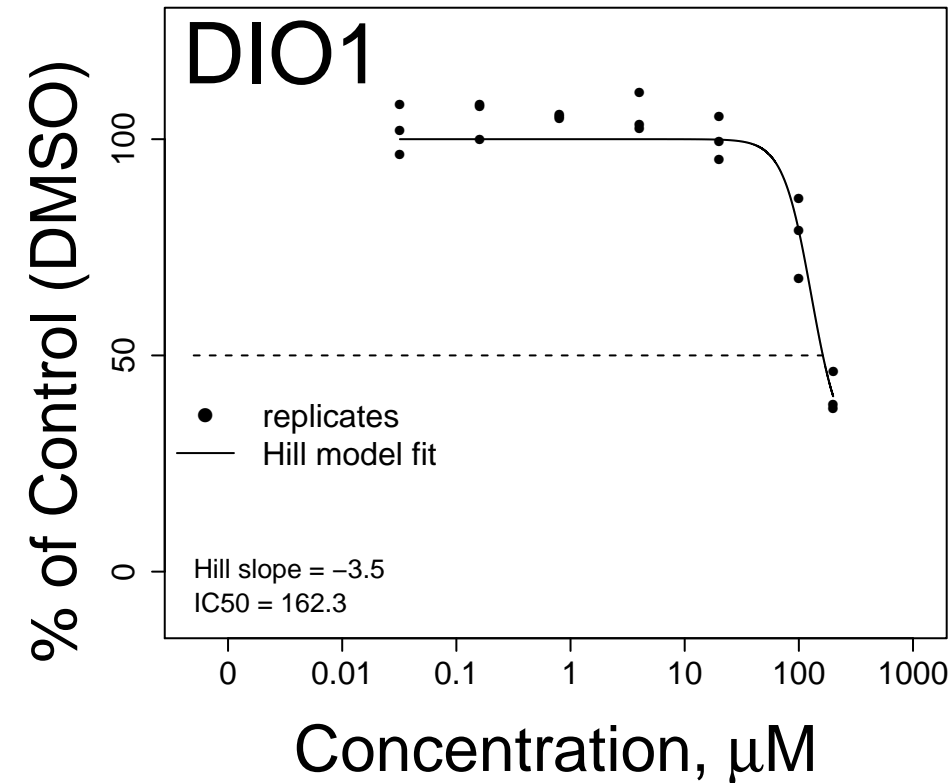

Darbufelone mesylate CASRN: 139340-56-0

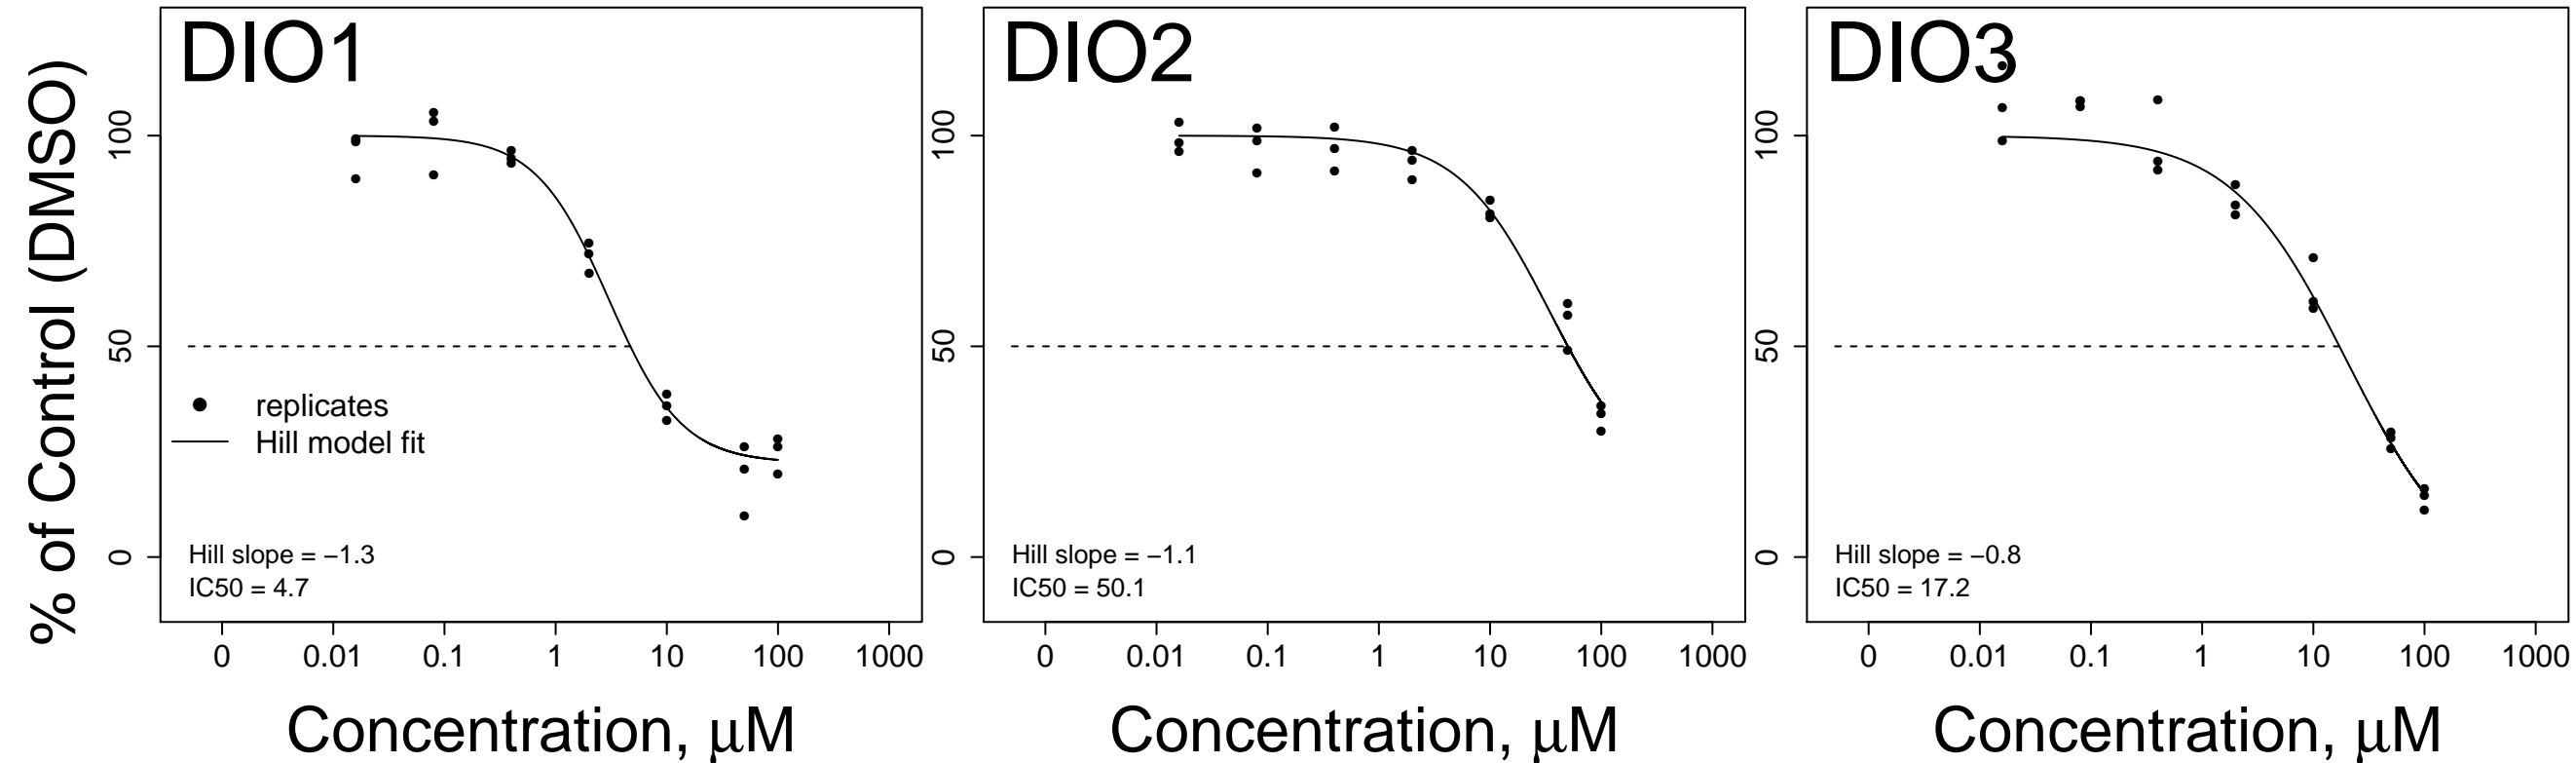

4-(1,1,3,3-Tetramethylbutyl)phenol CASRN: 140-66-9

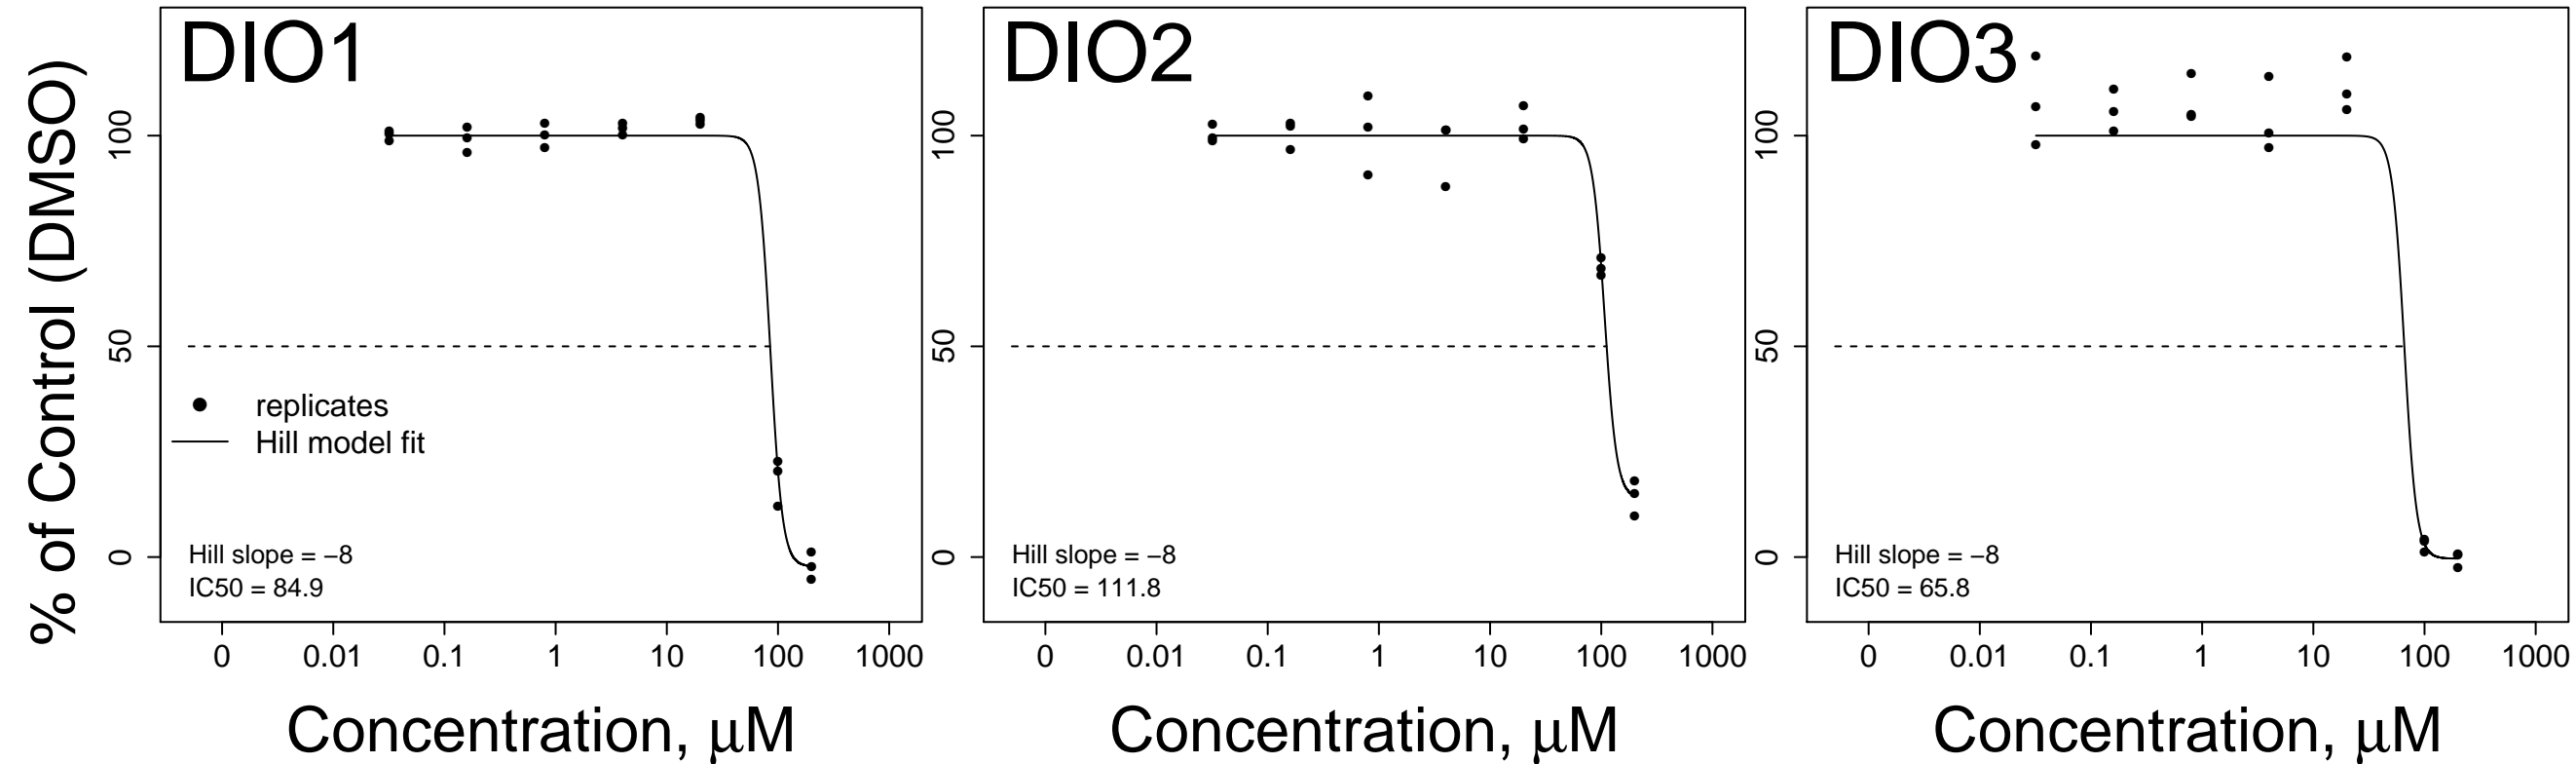

Tannic acid CASRN: 1401-55-4

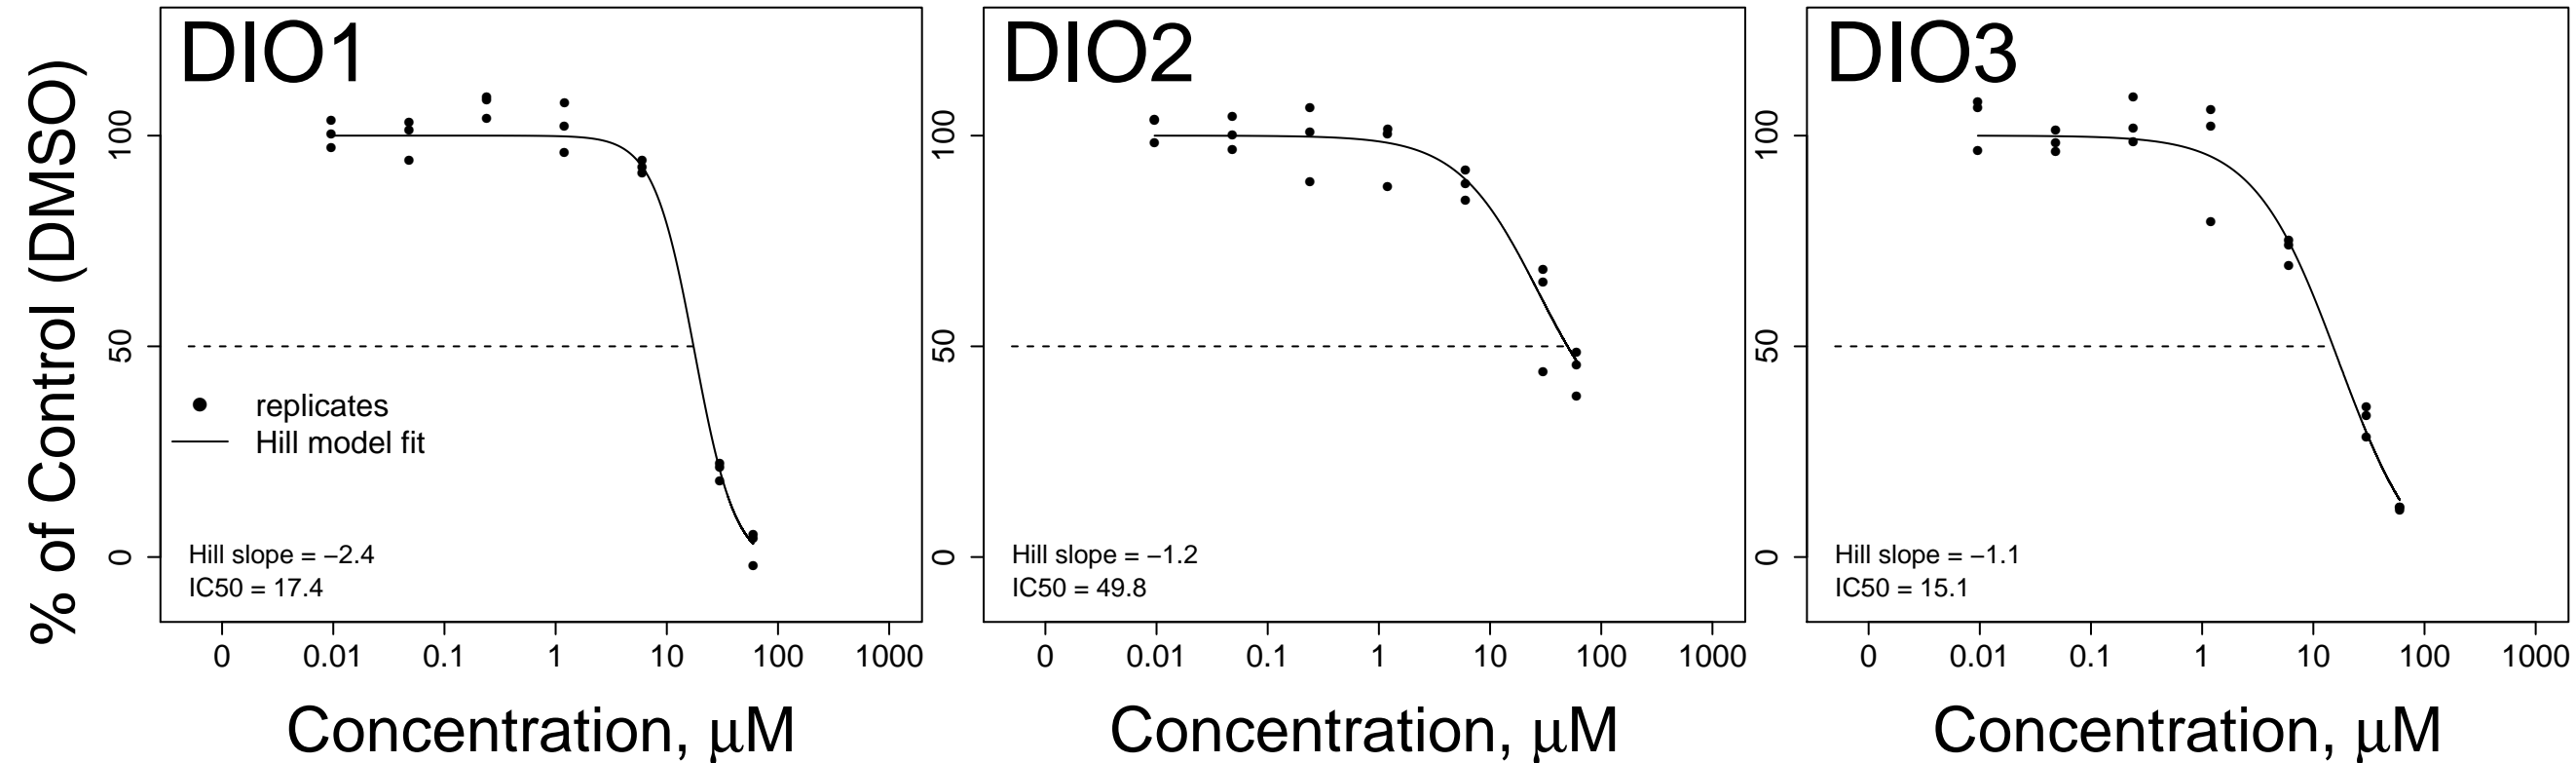



Kepone CASRN: 143-50-0

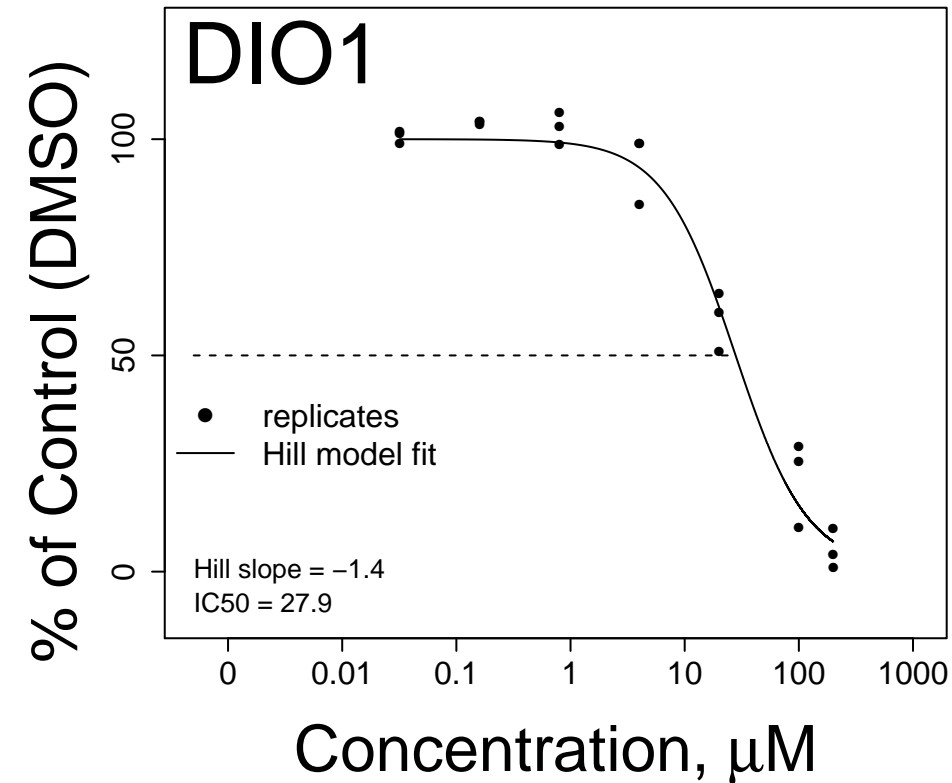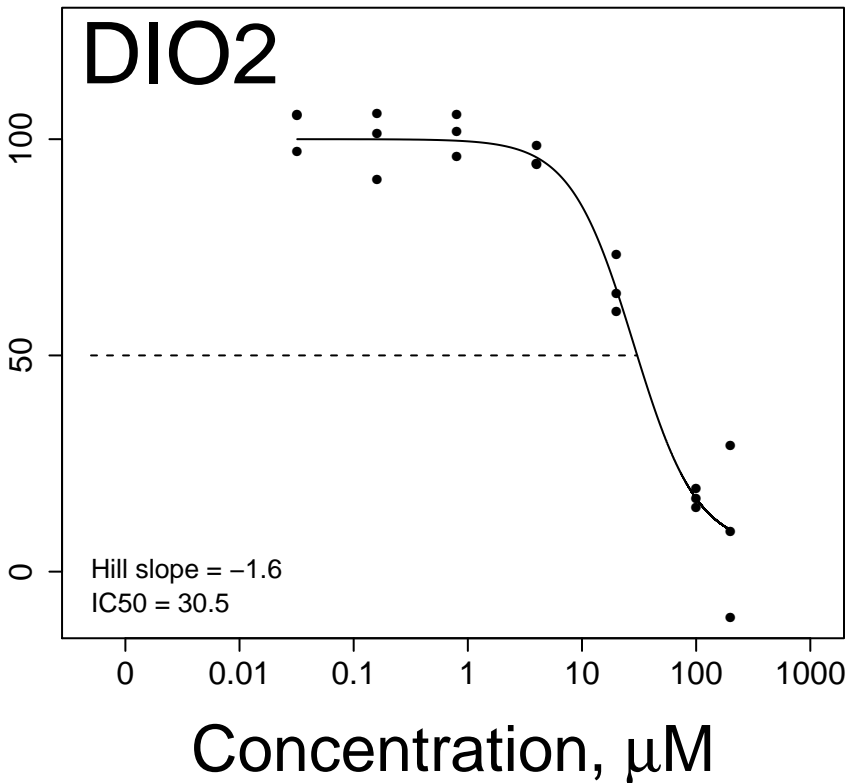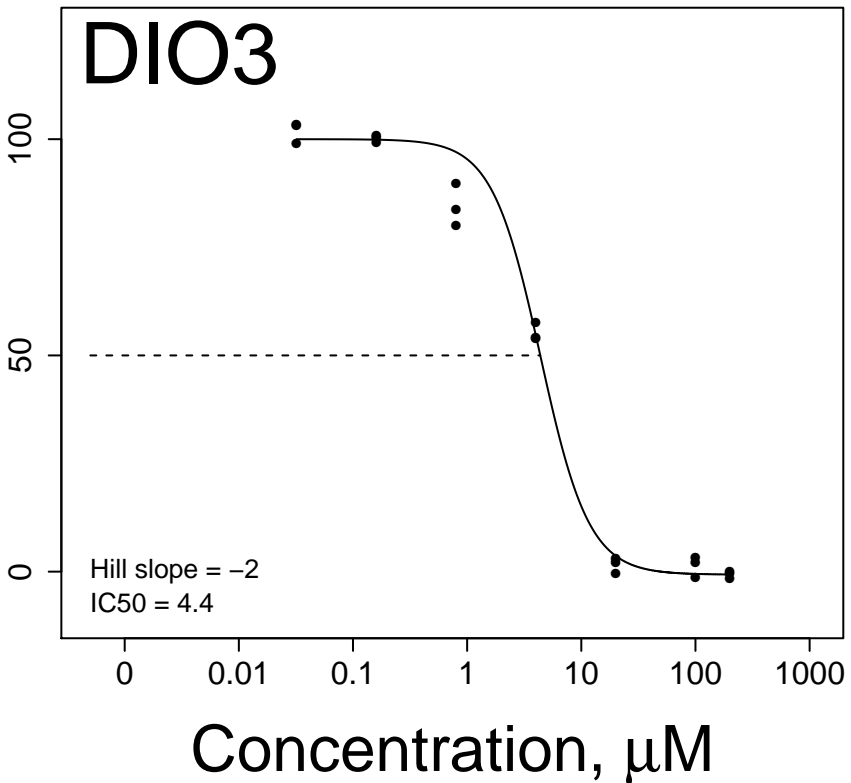

Bisphenol AF CASRN: 1478-61-1

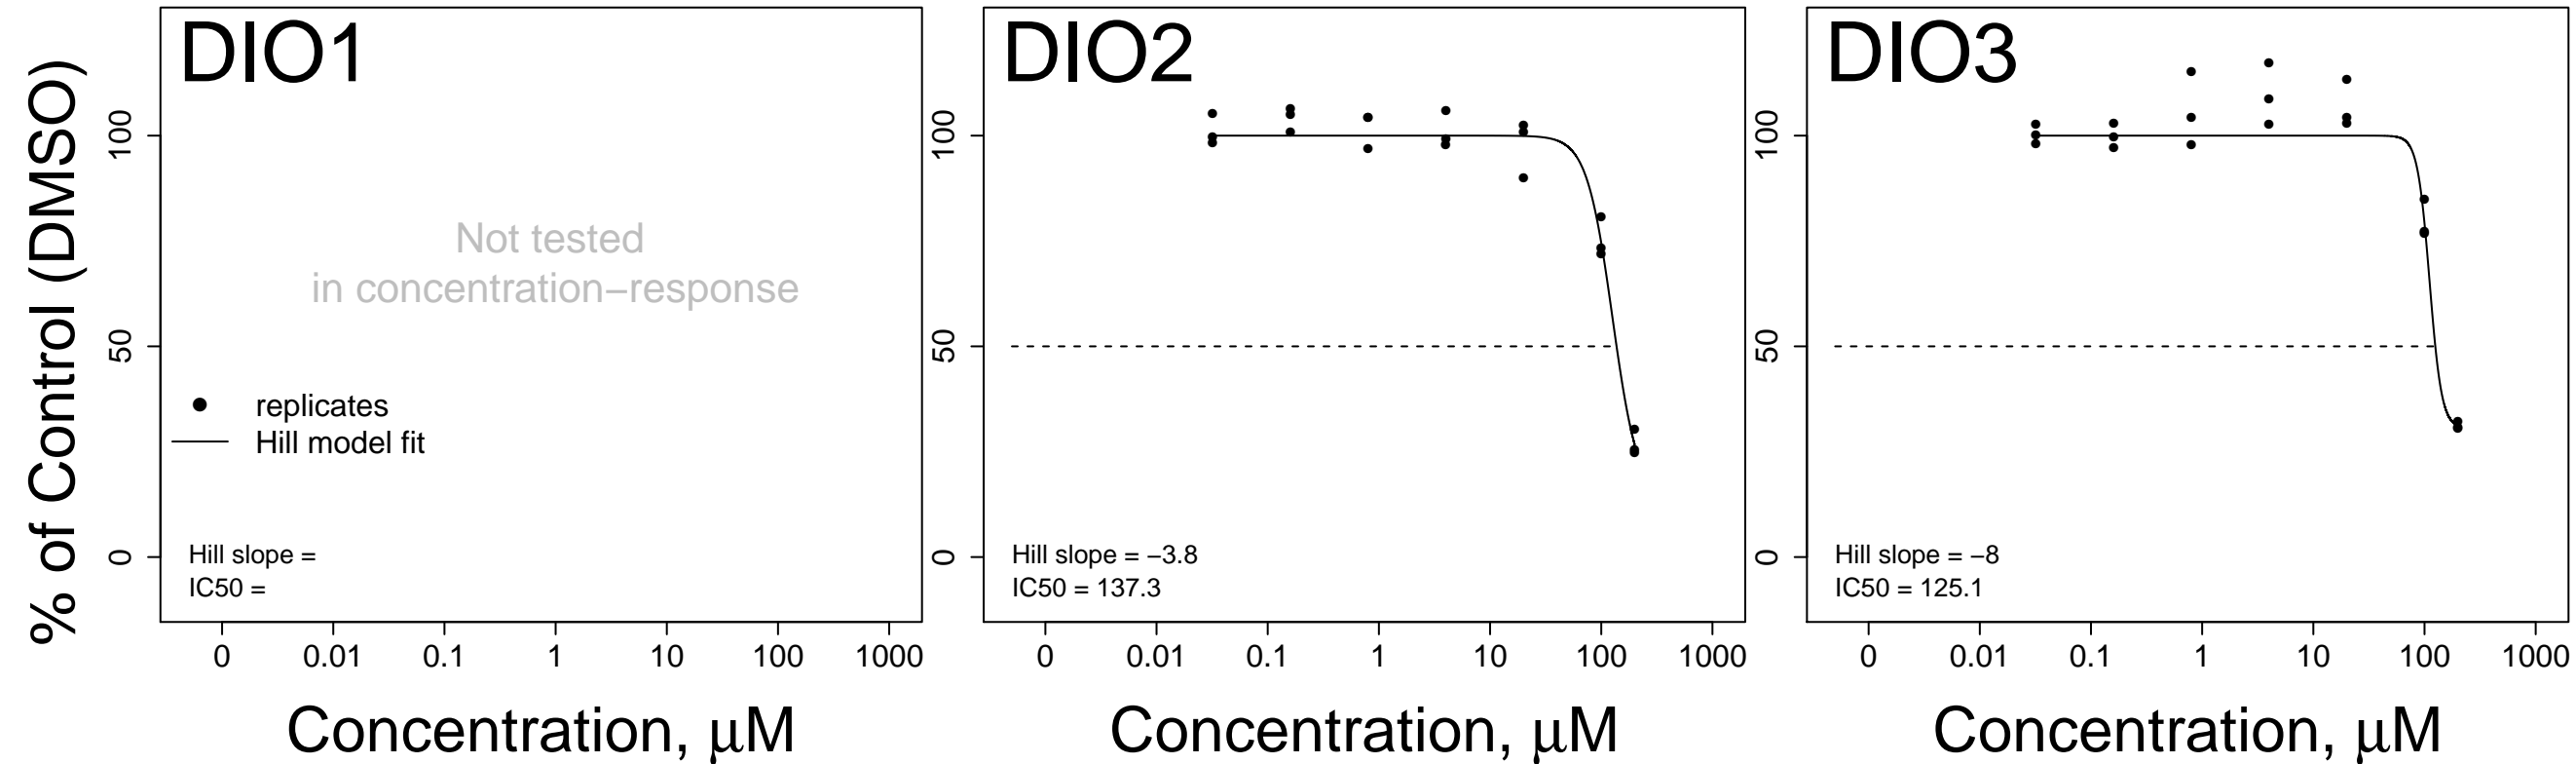

2-Mercaptobenzothiazole CASRN: 149-30-4

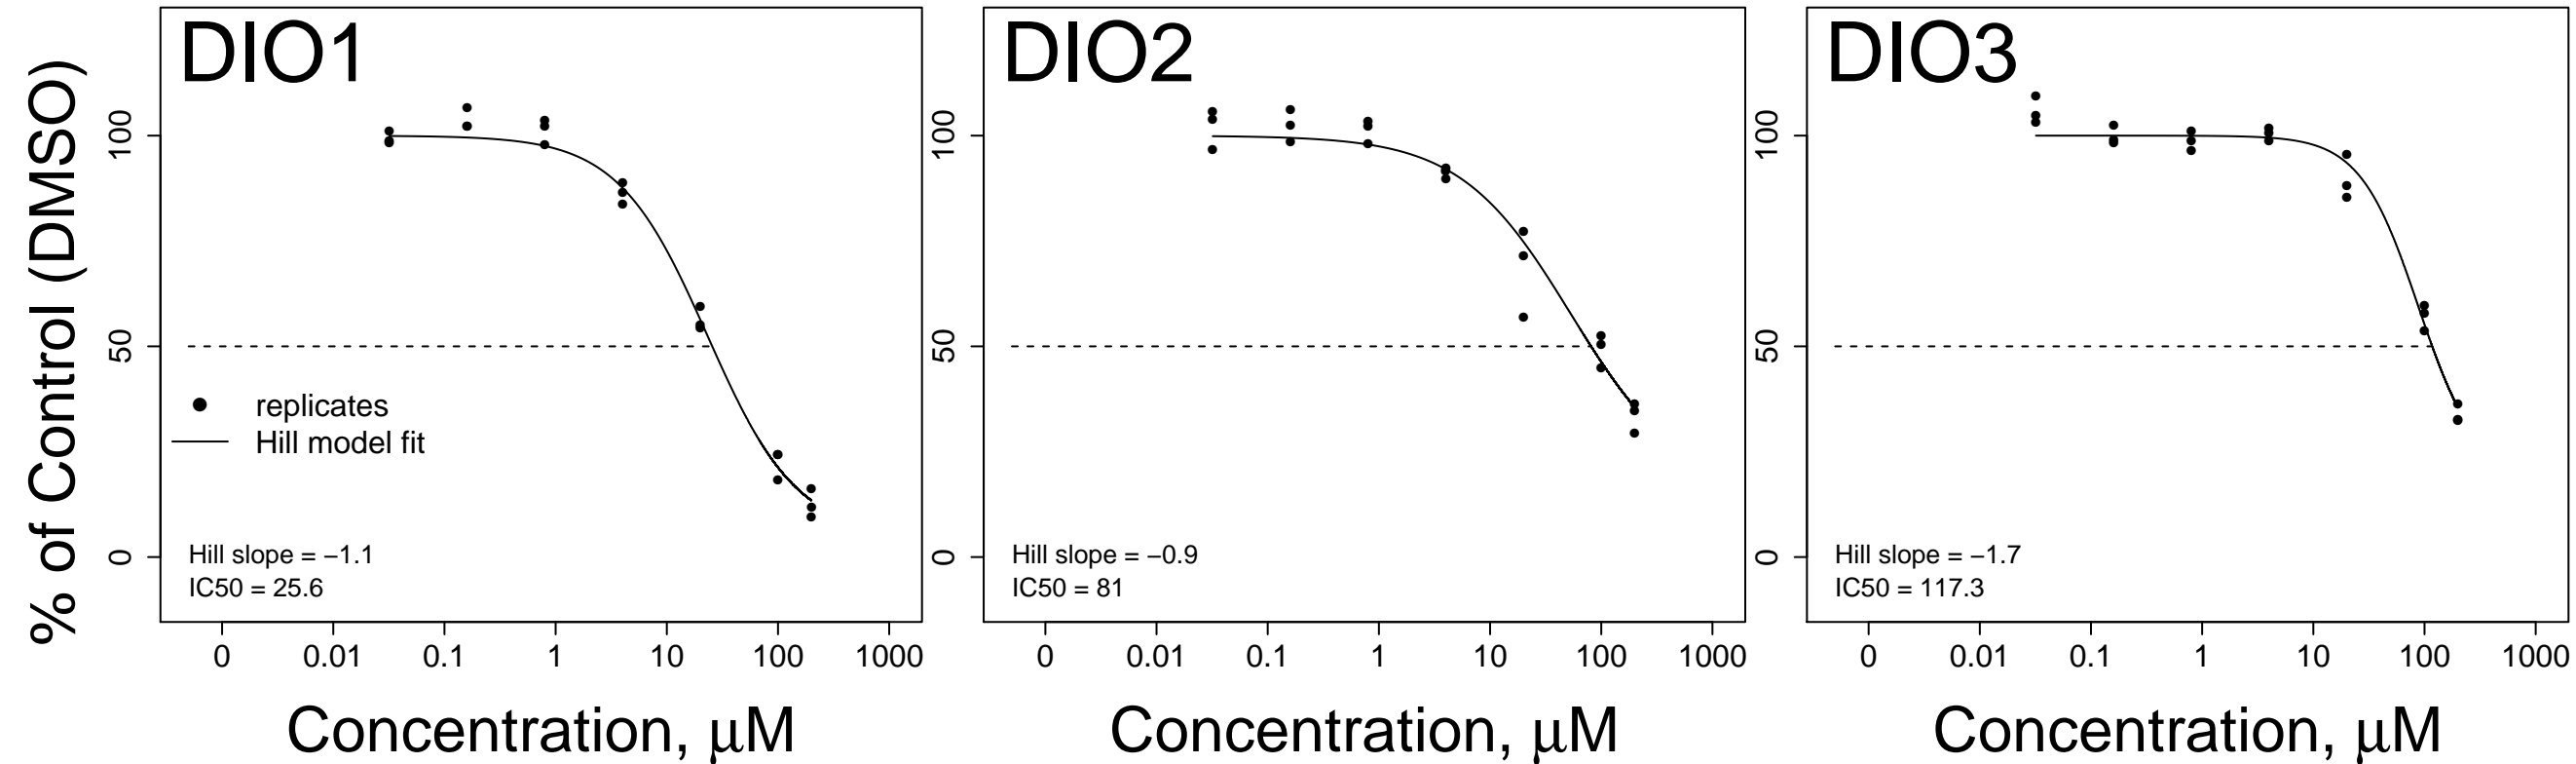

## FR150011 CASRN: 149413-74-1

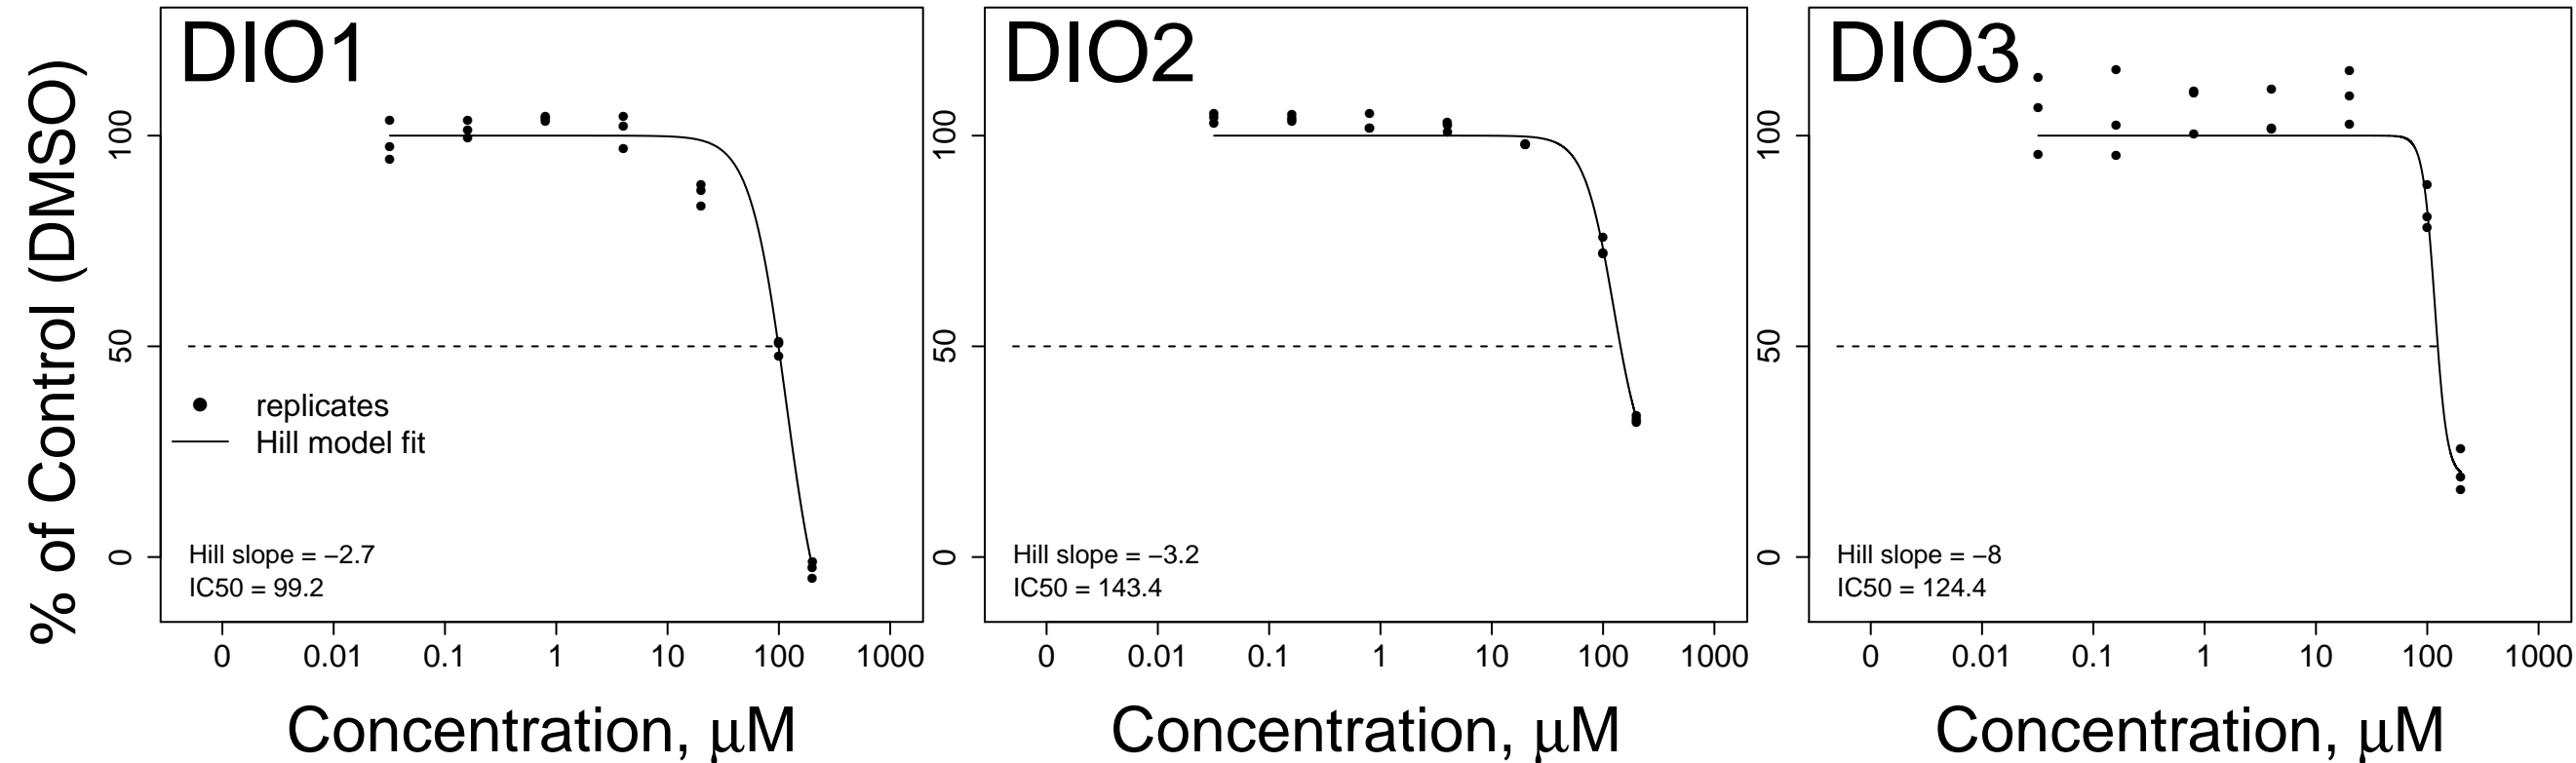

Sodium dodecyl sulfate CASRN: 151-21-3

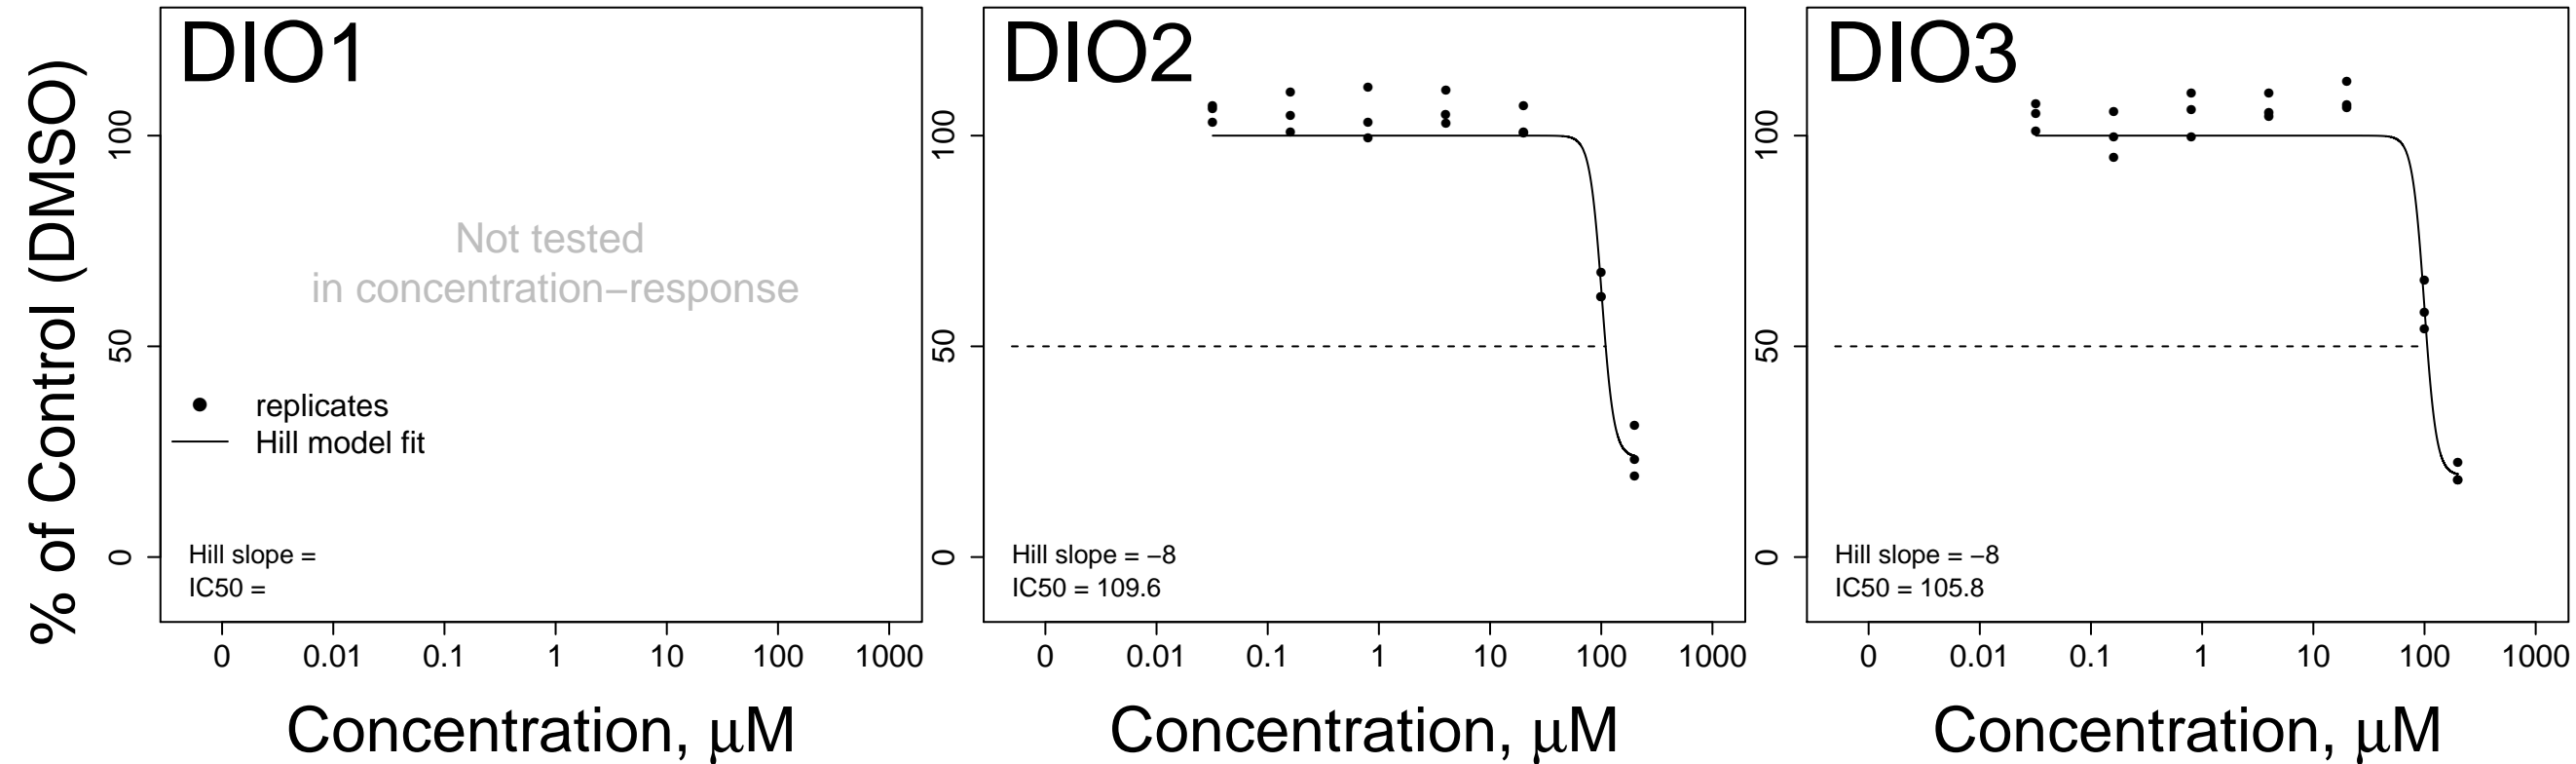

Celecoxib CASRN: 169590-42-5

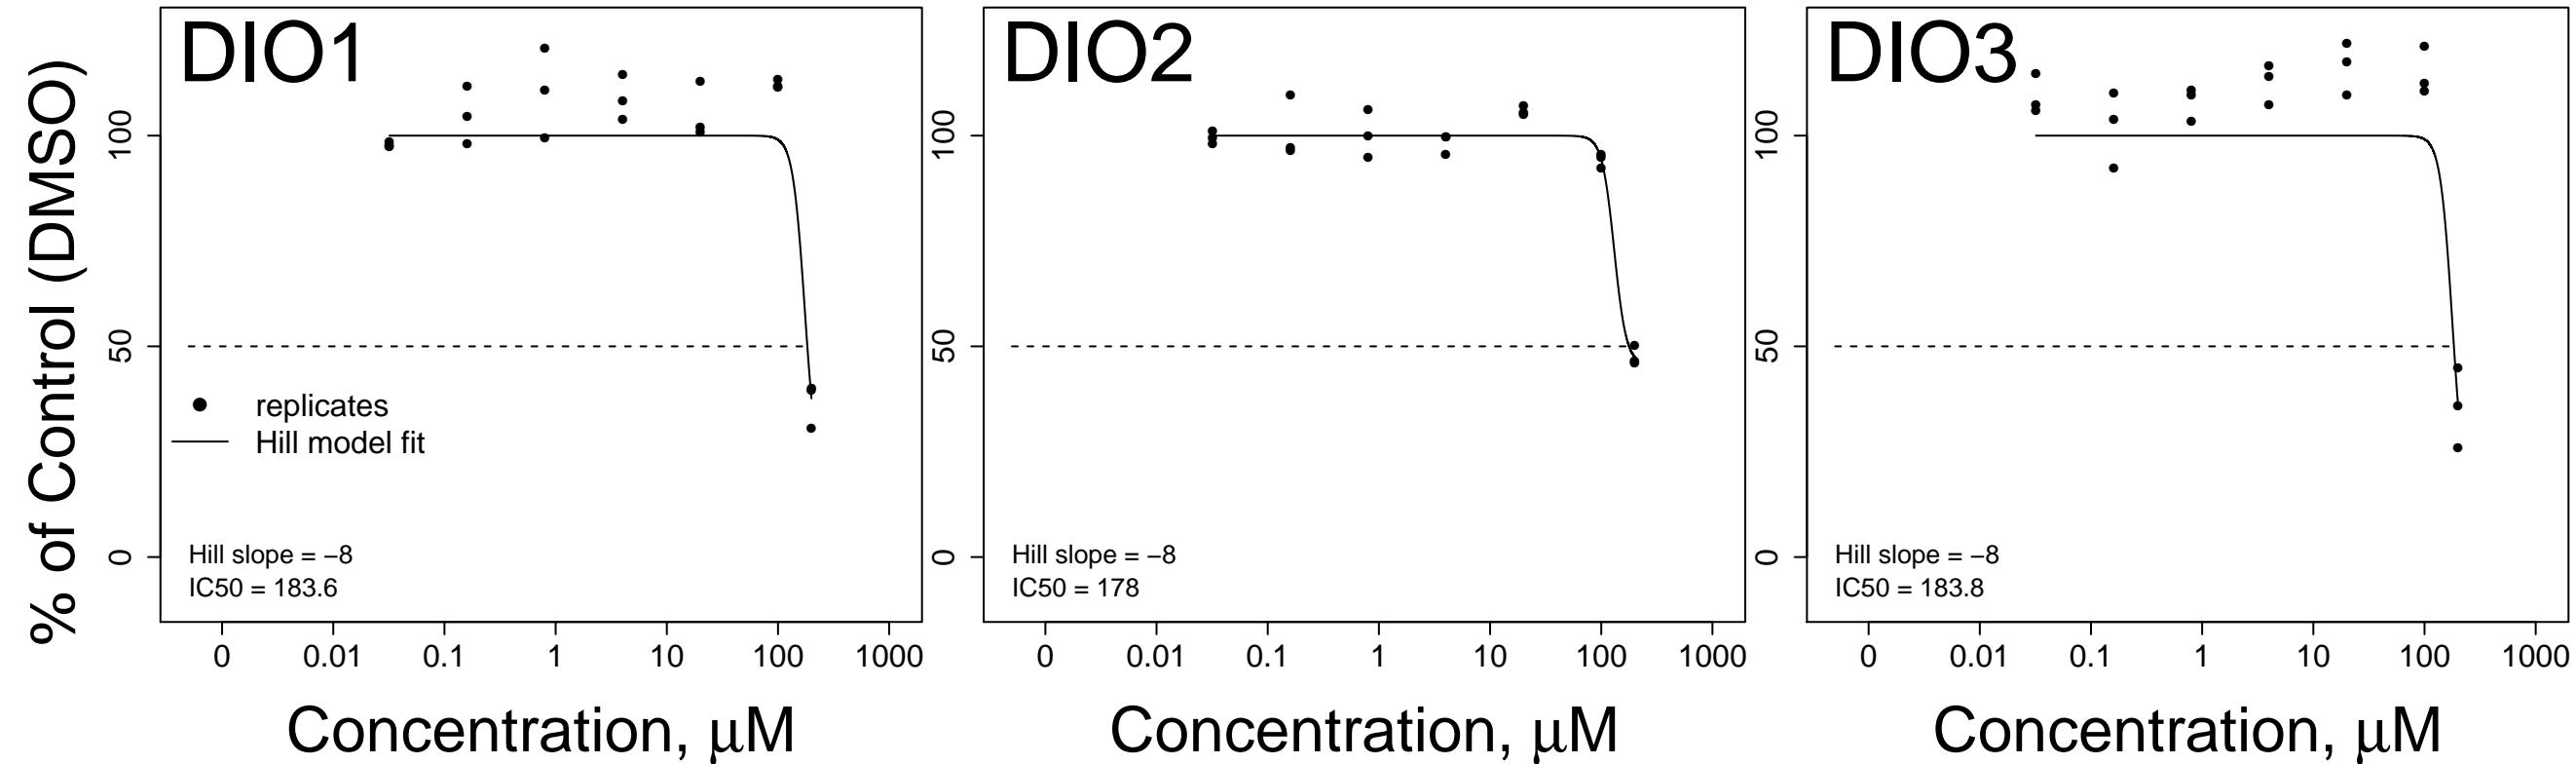

CJ-013790 CASRN: 179465-71-5

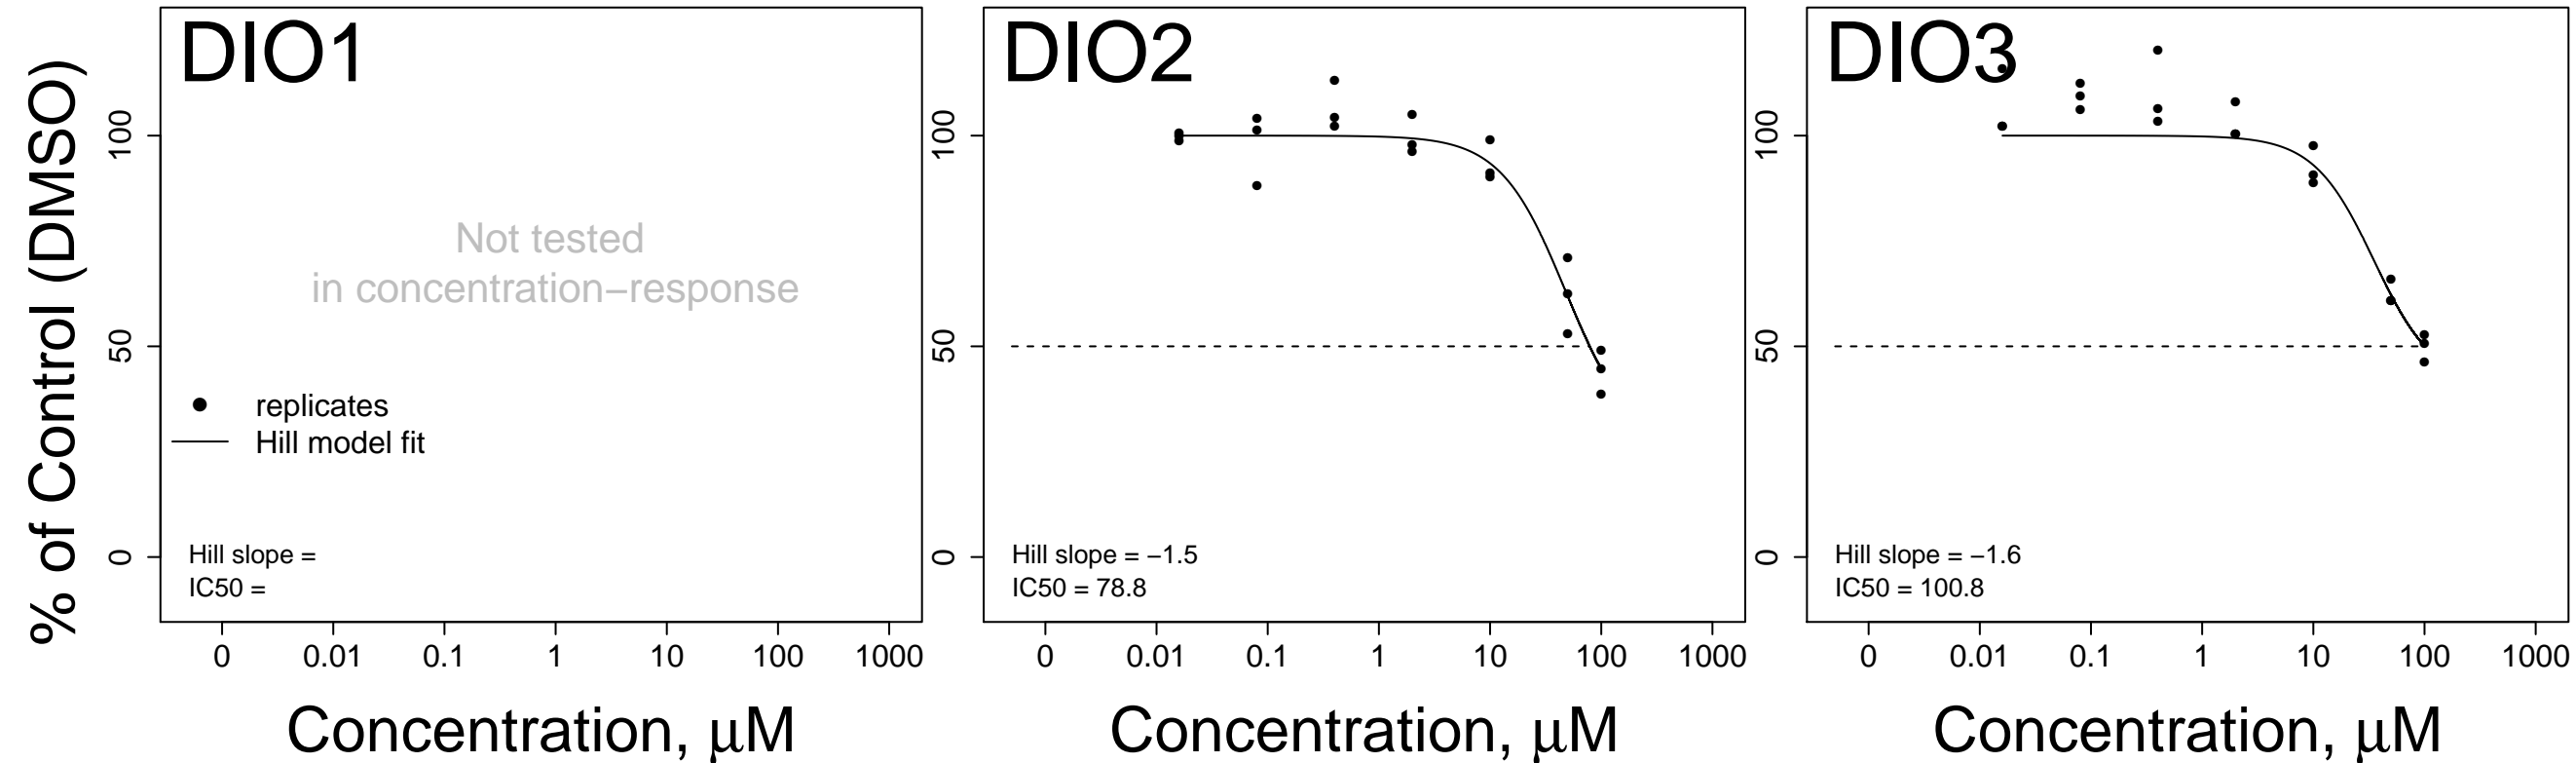

# 4-Octylphenol CASRN: 1806-26-4

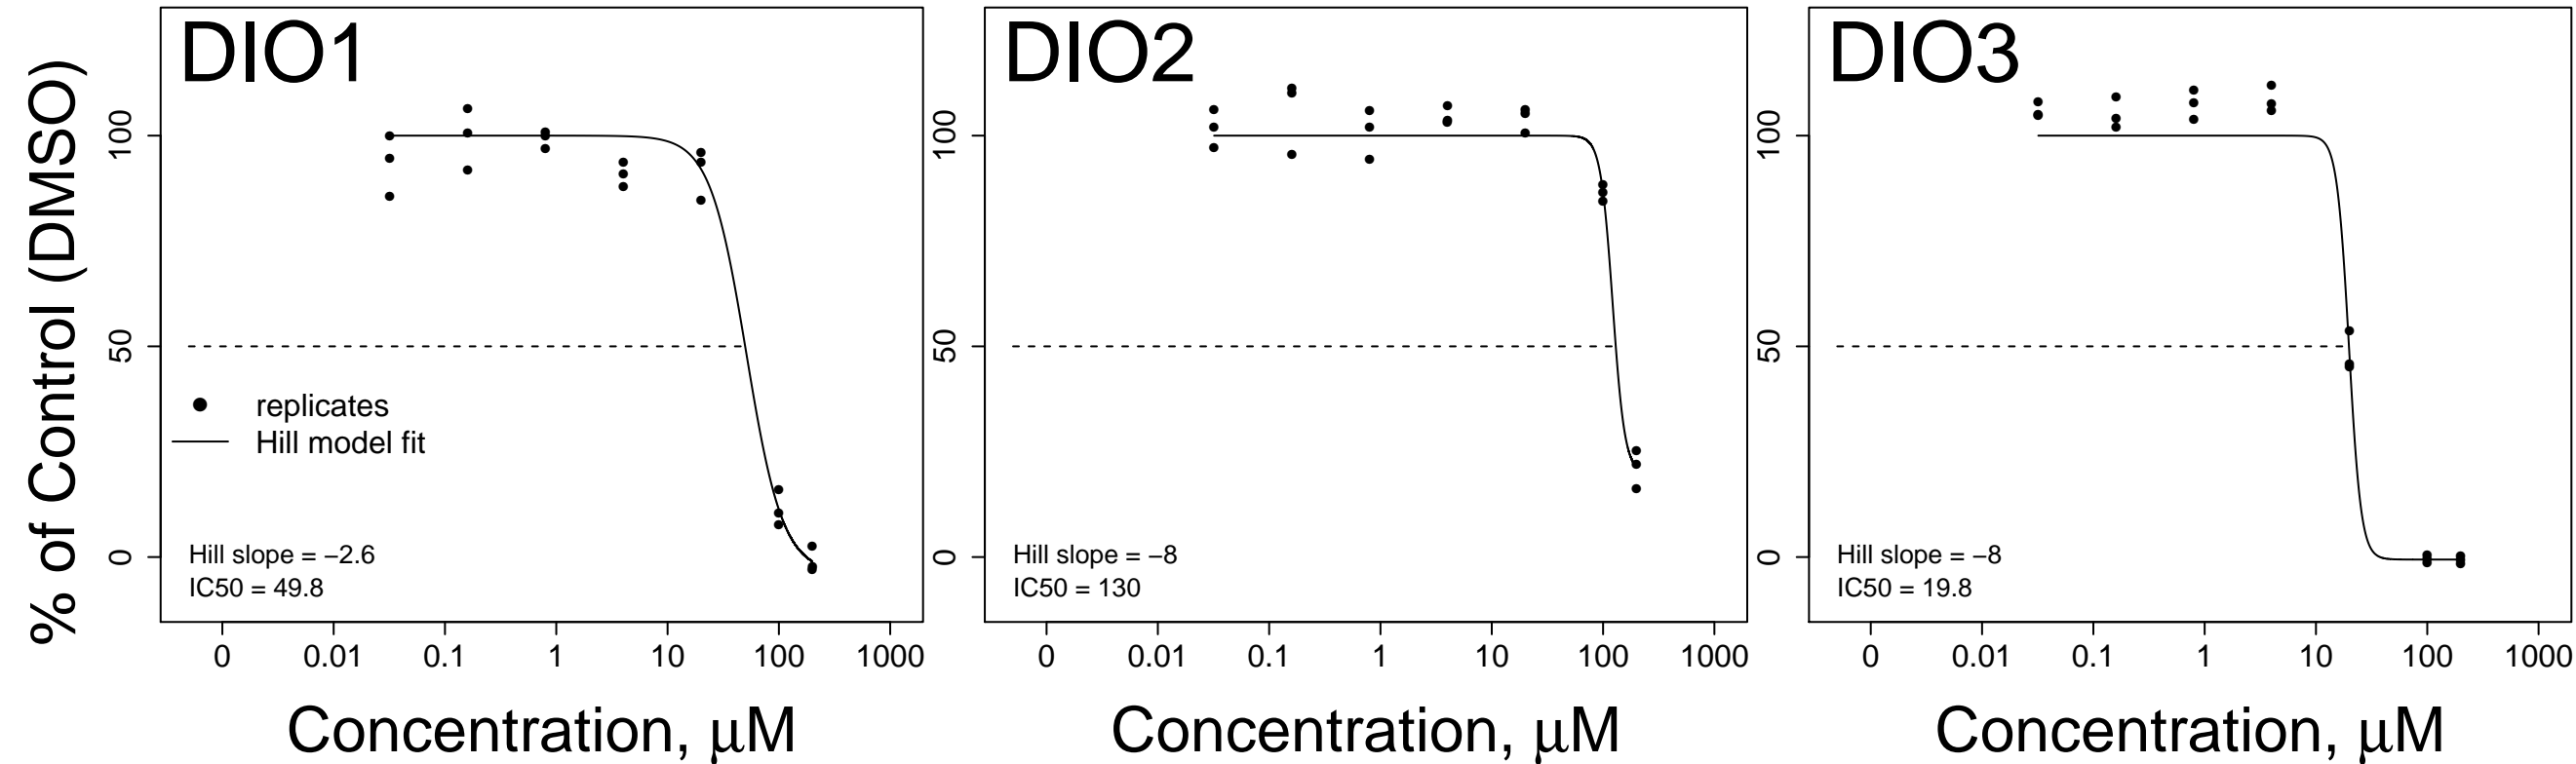



Farglitazar CASRN: 196808-45-4

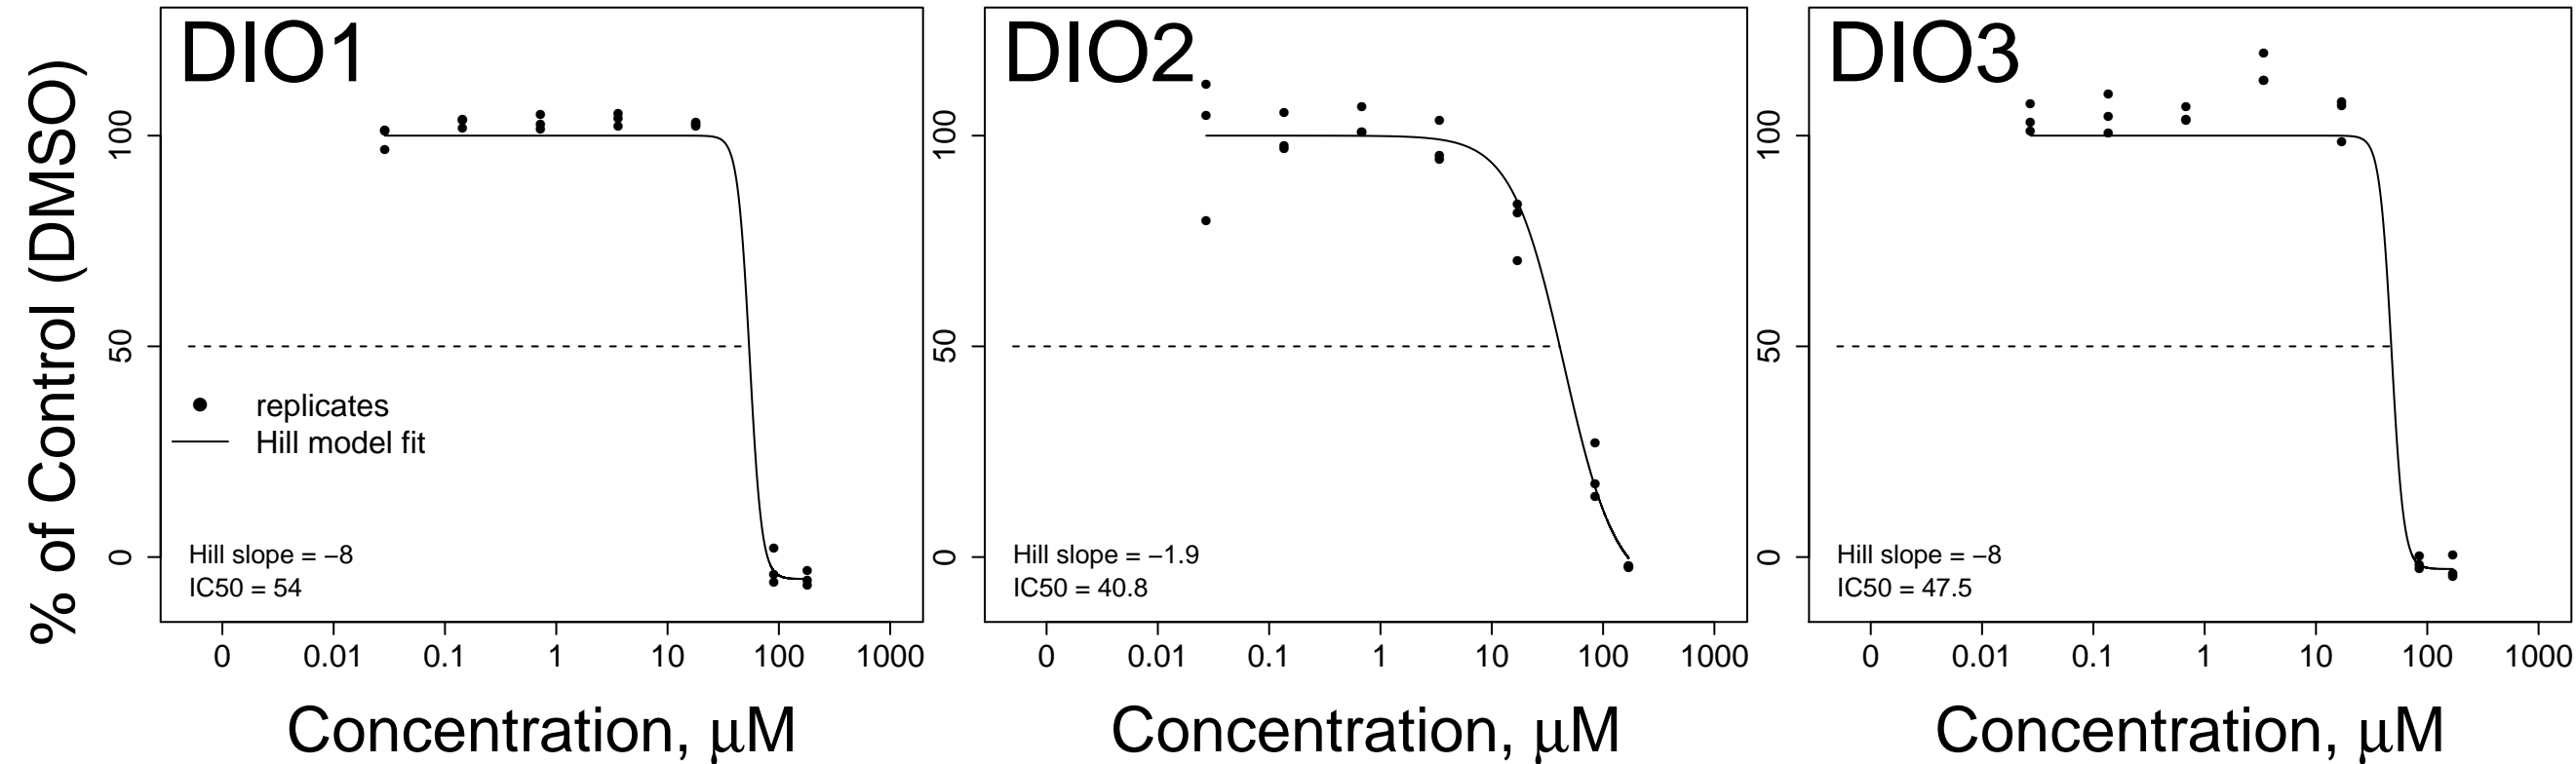

# 4-Heptylphenol CASRN: 1987-50-4

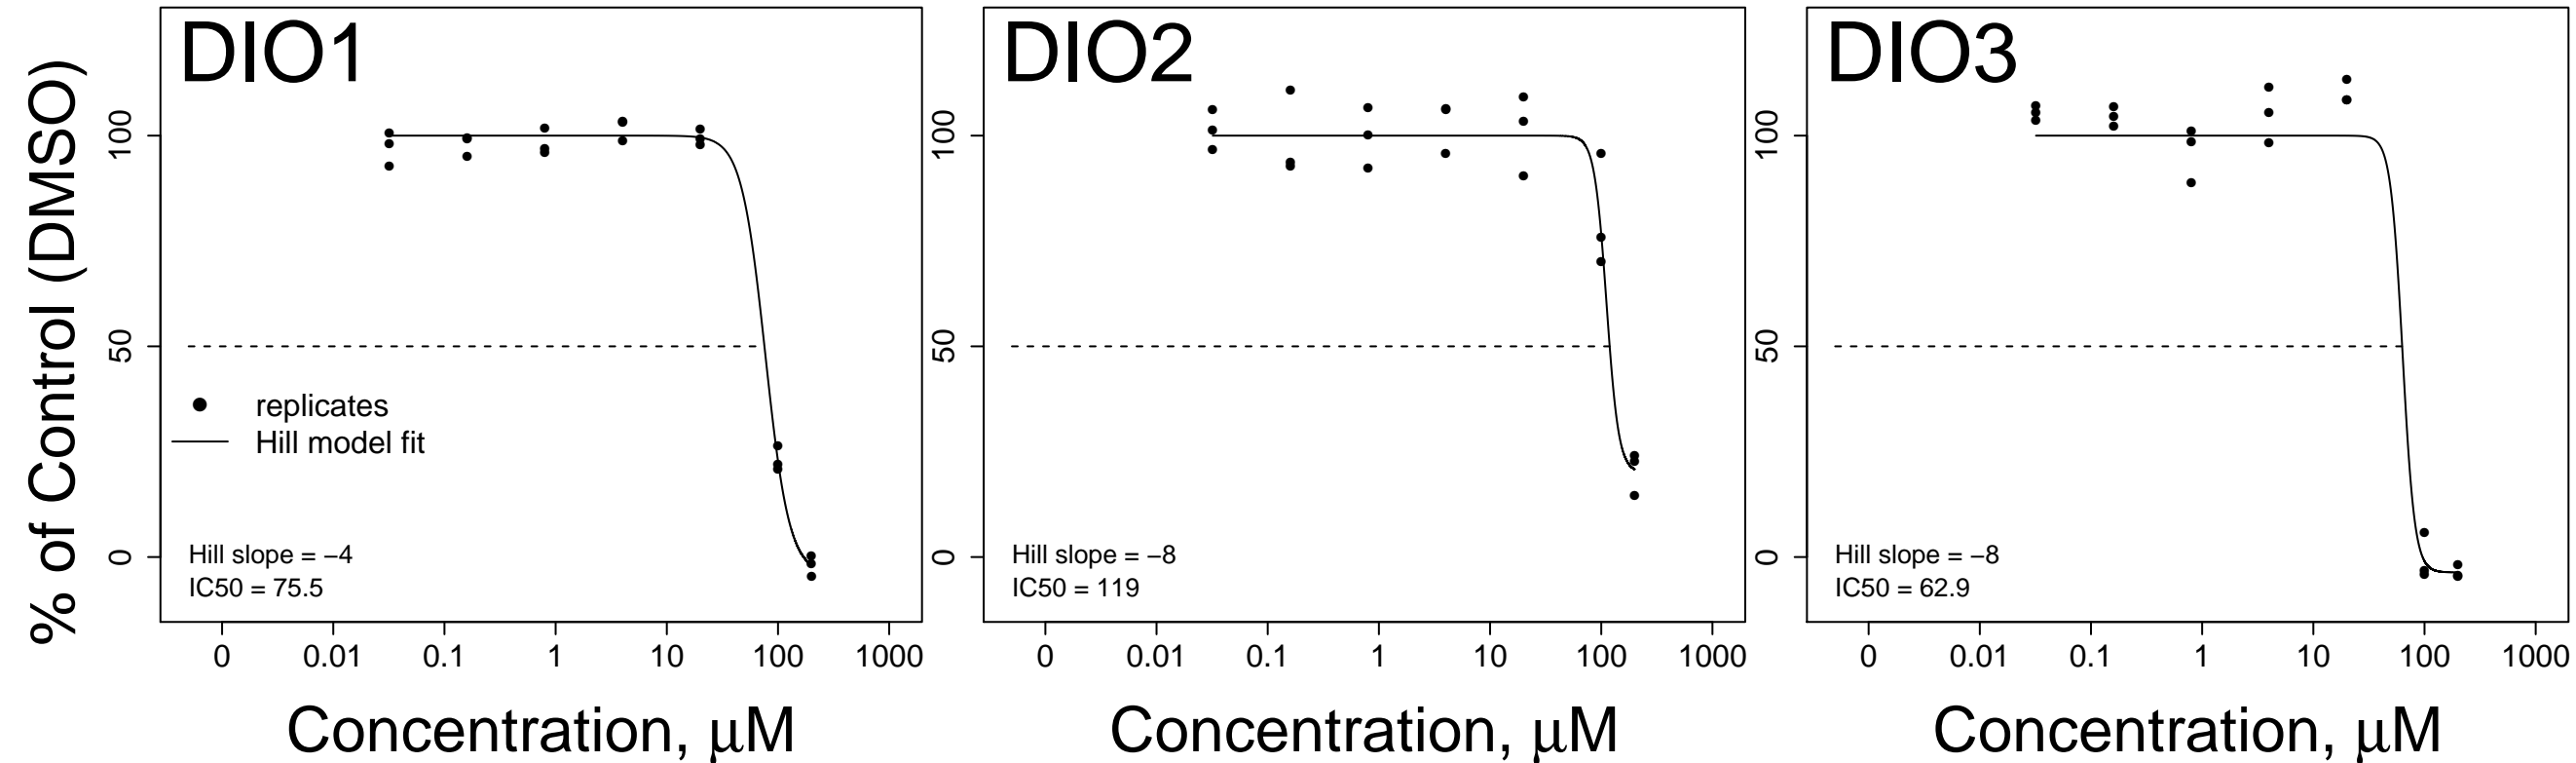

UK-337312 CASRN: 203942-49-8

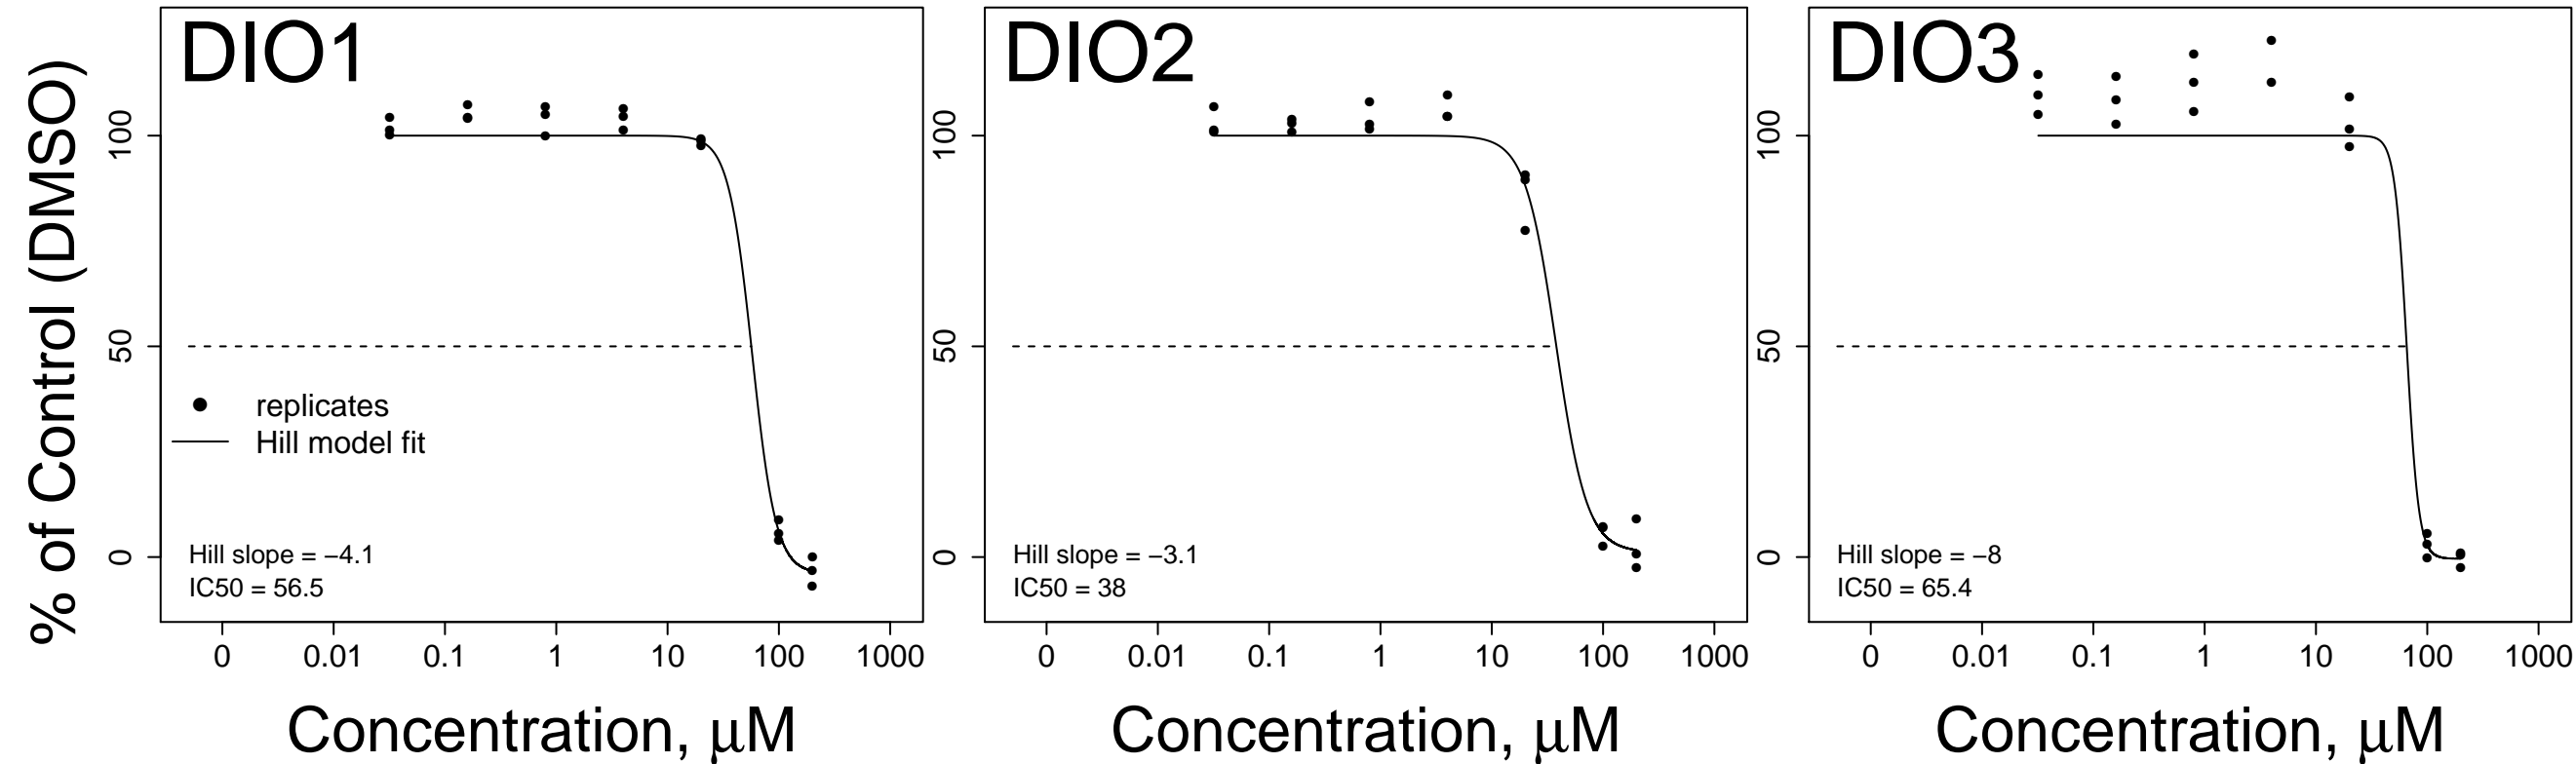

Oxytetracycline hydrochloride CASRN: 2058-46-0

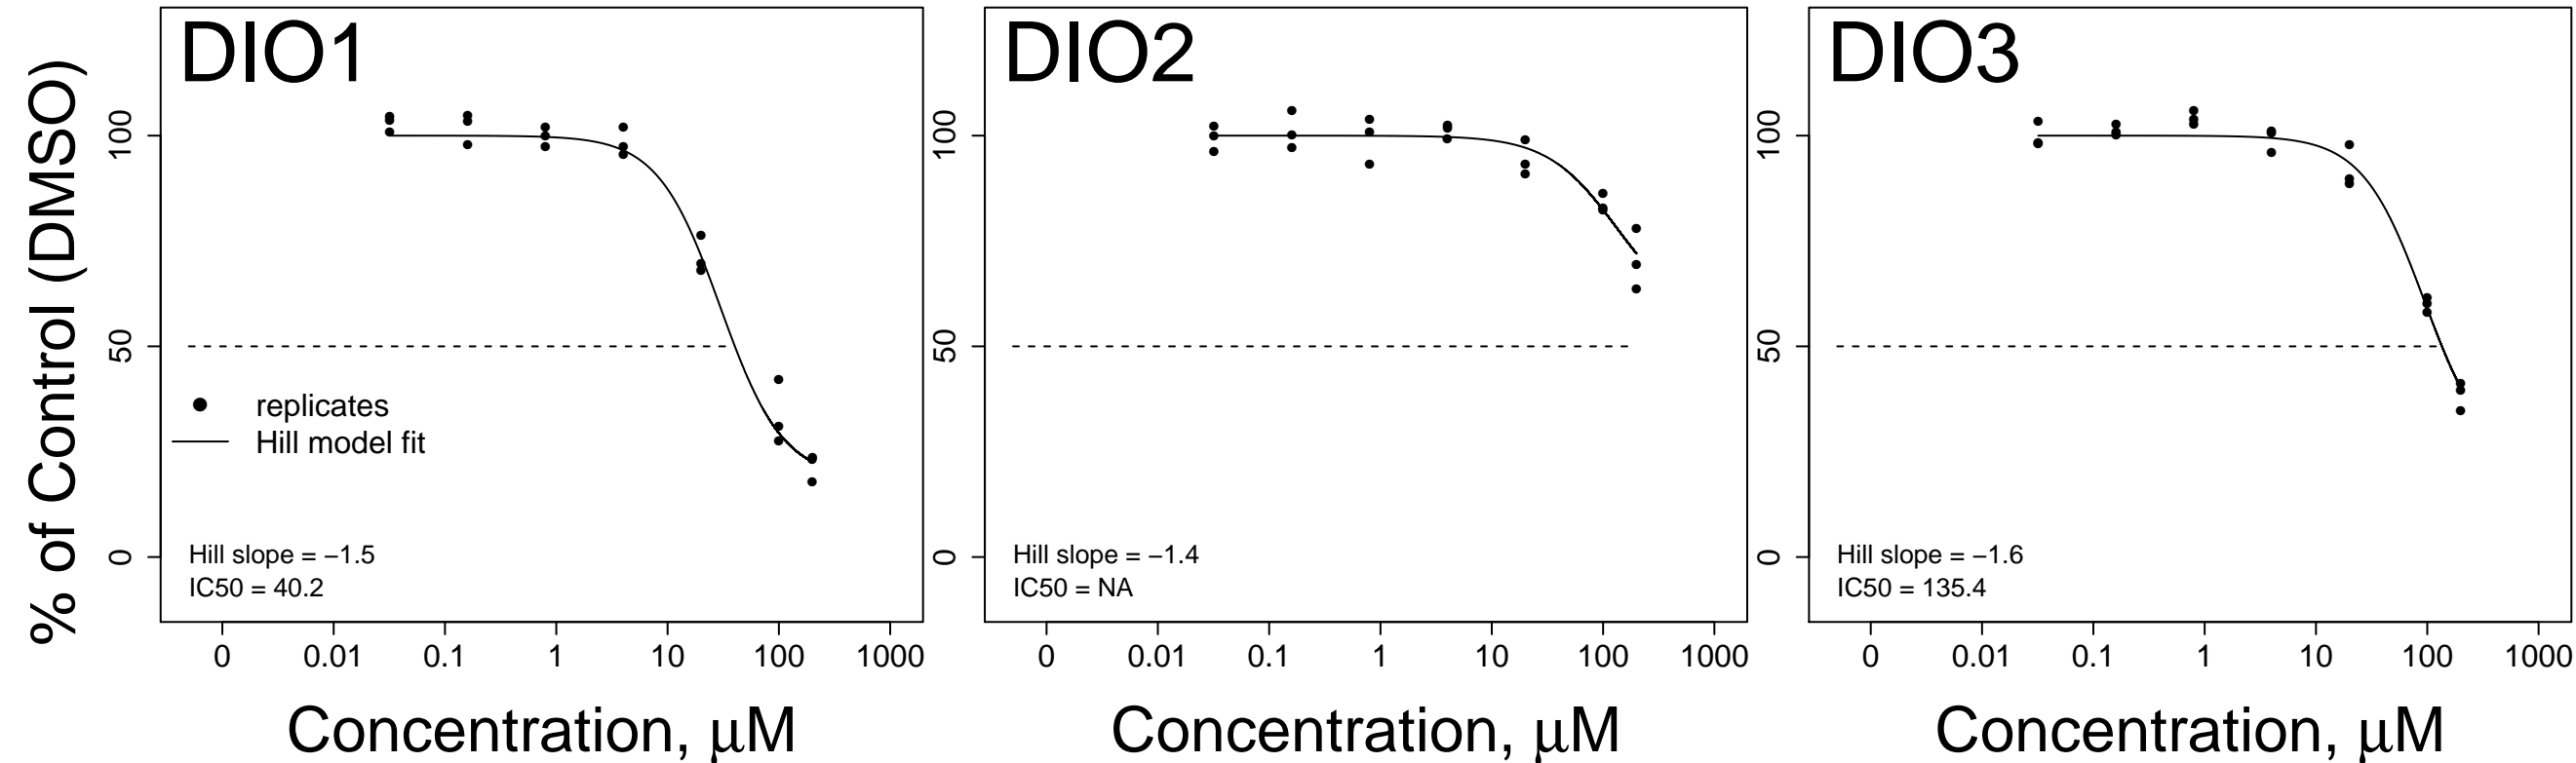

Perfluoroundecanoic acid CASRN: 2058-94-8

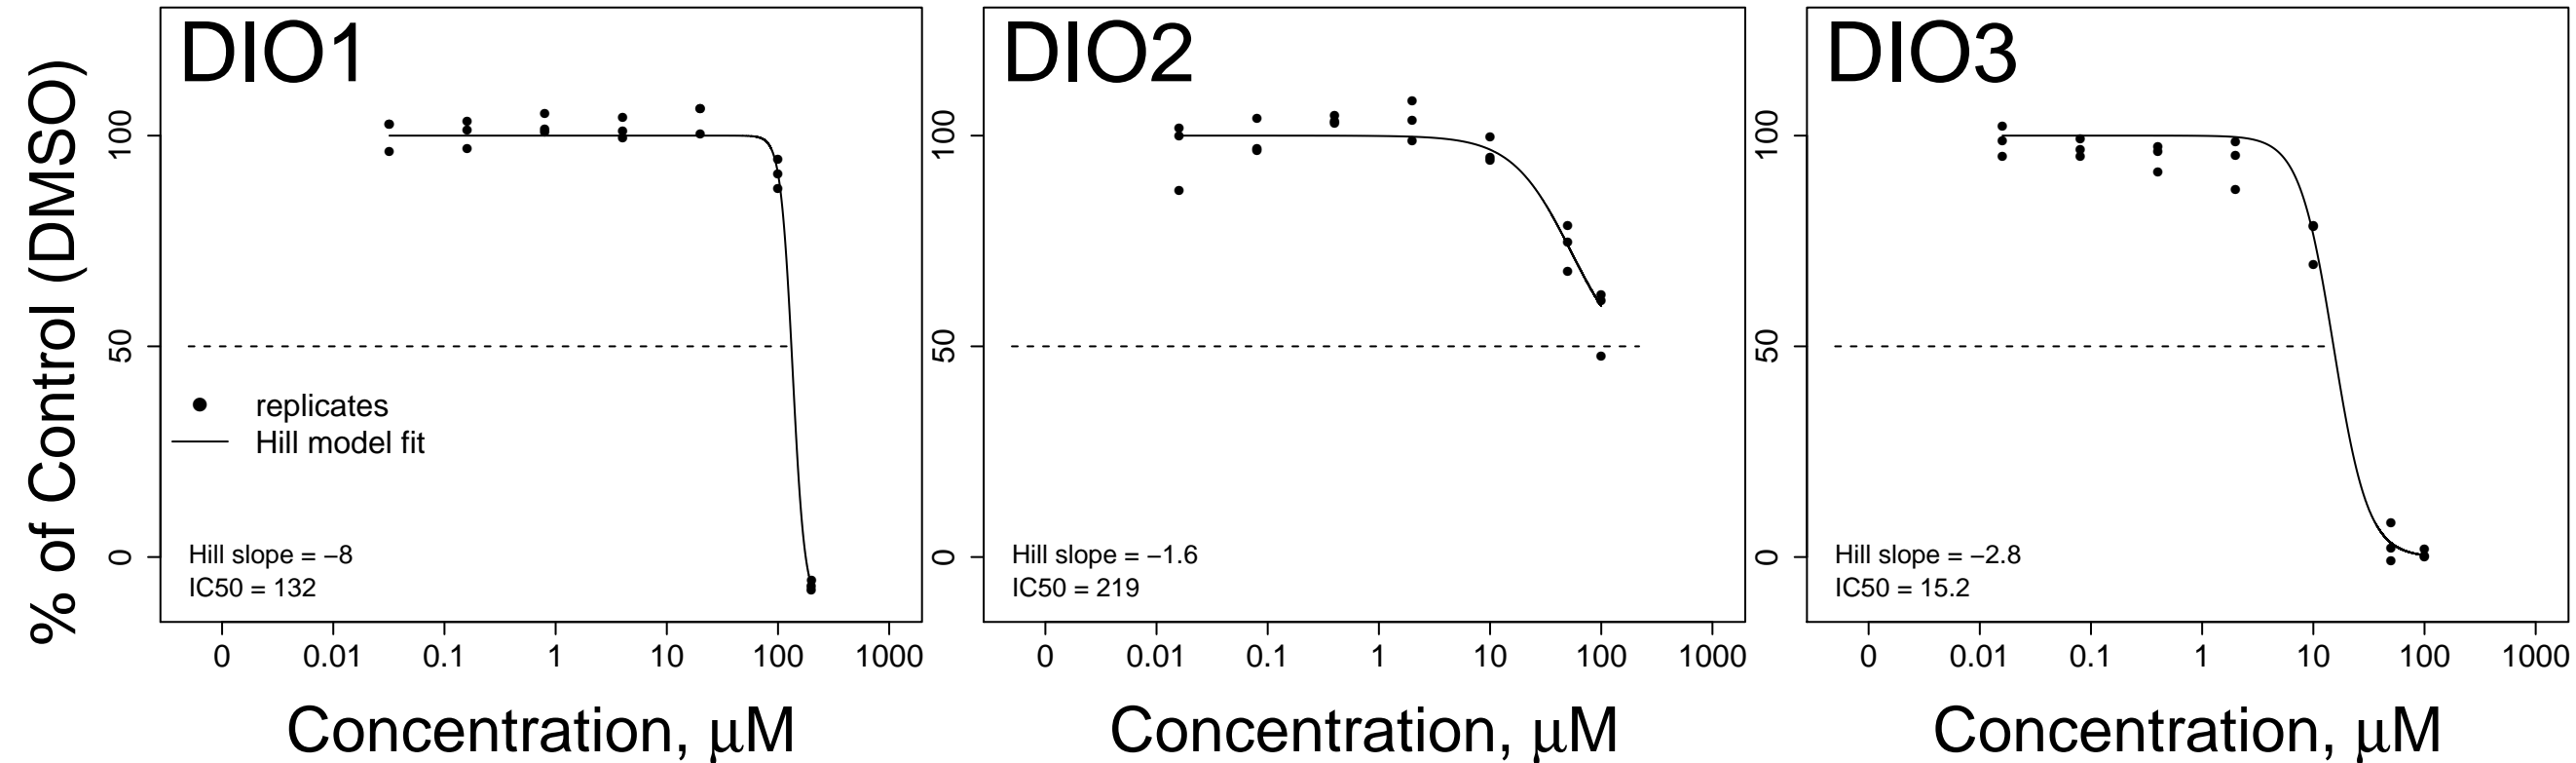

CI-1029 CASRN: 207736-05-8

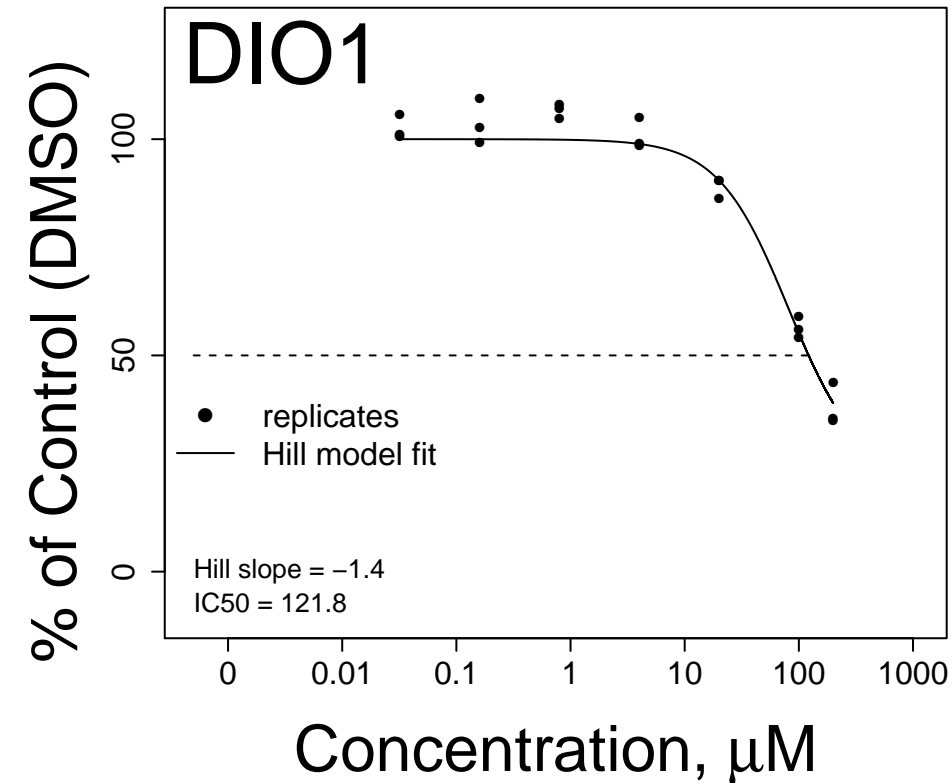

Pentachloropyridine CASRN: 2176-62-7

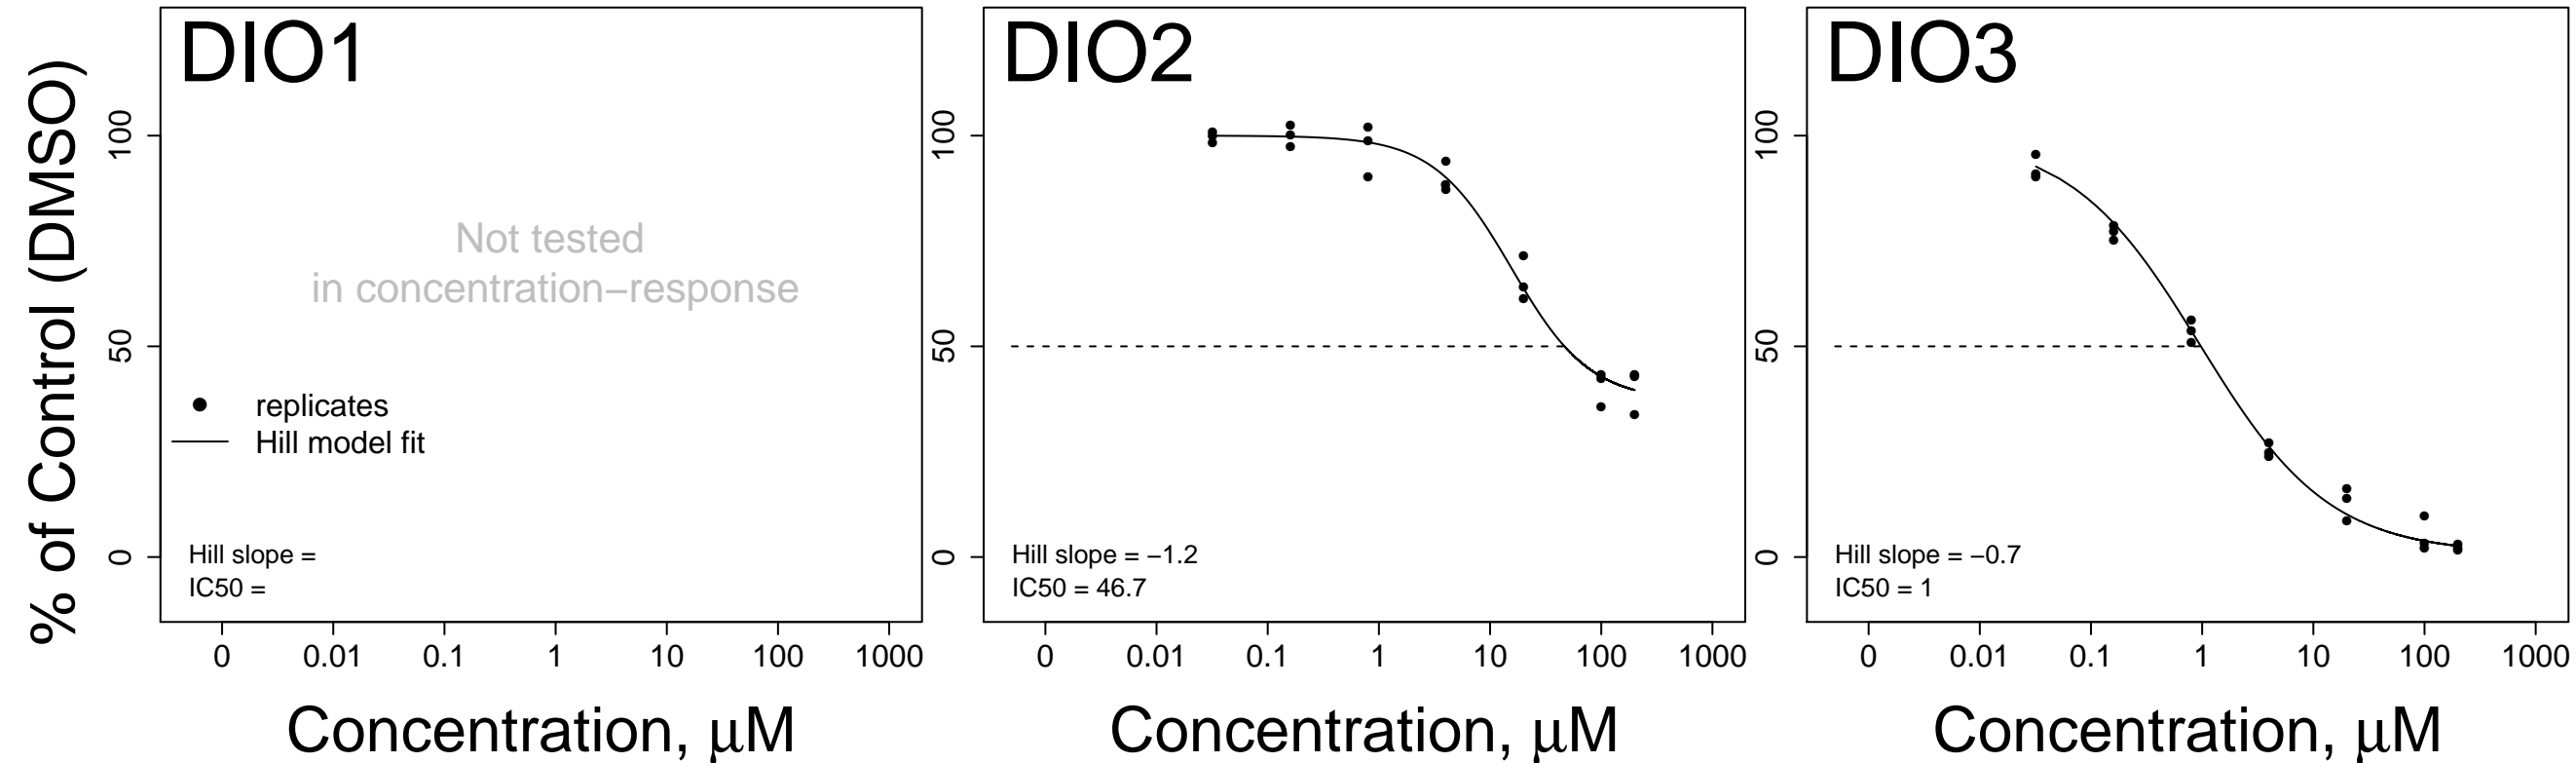

SR146131 trifluoroacetate (1:1) CASRN: 221671-62-1

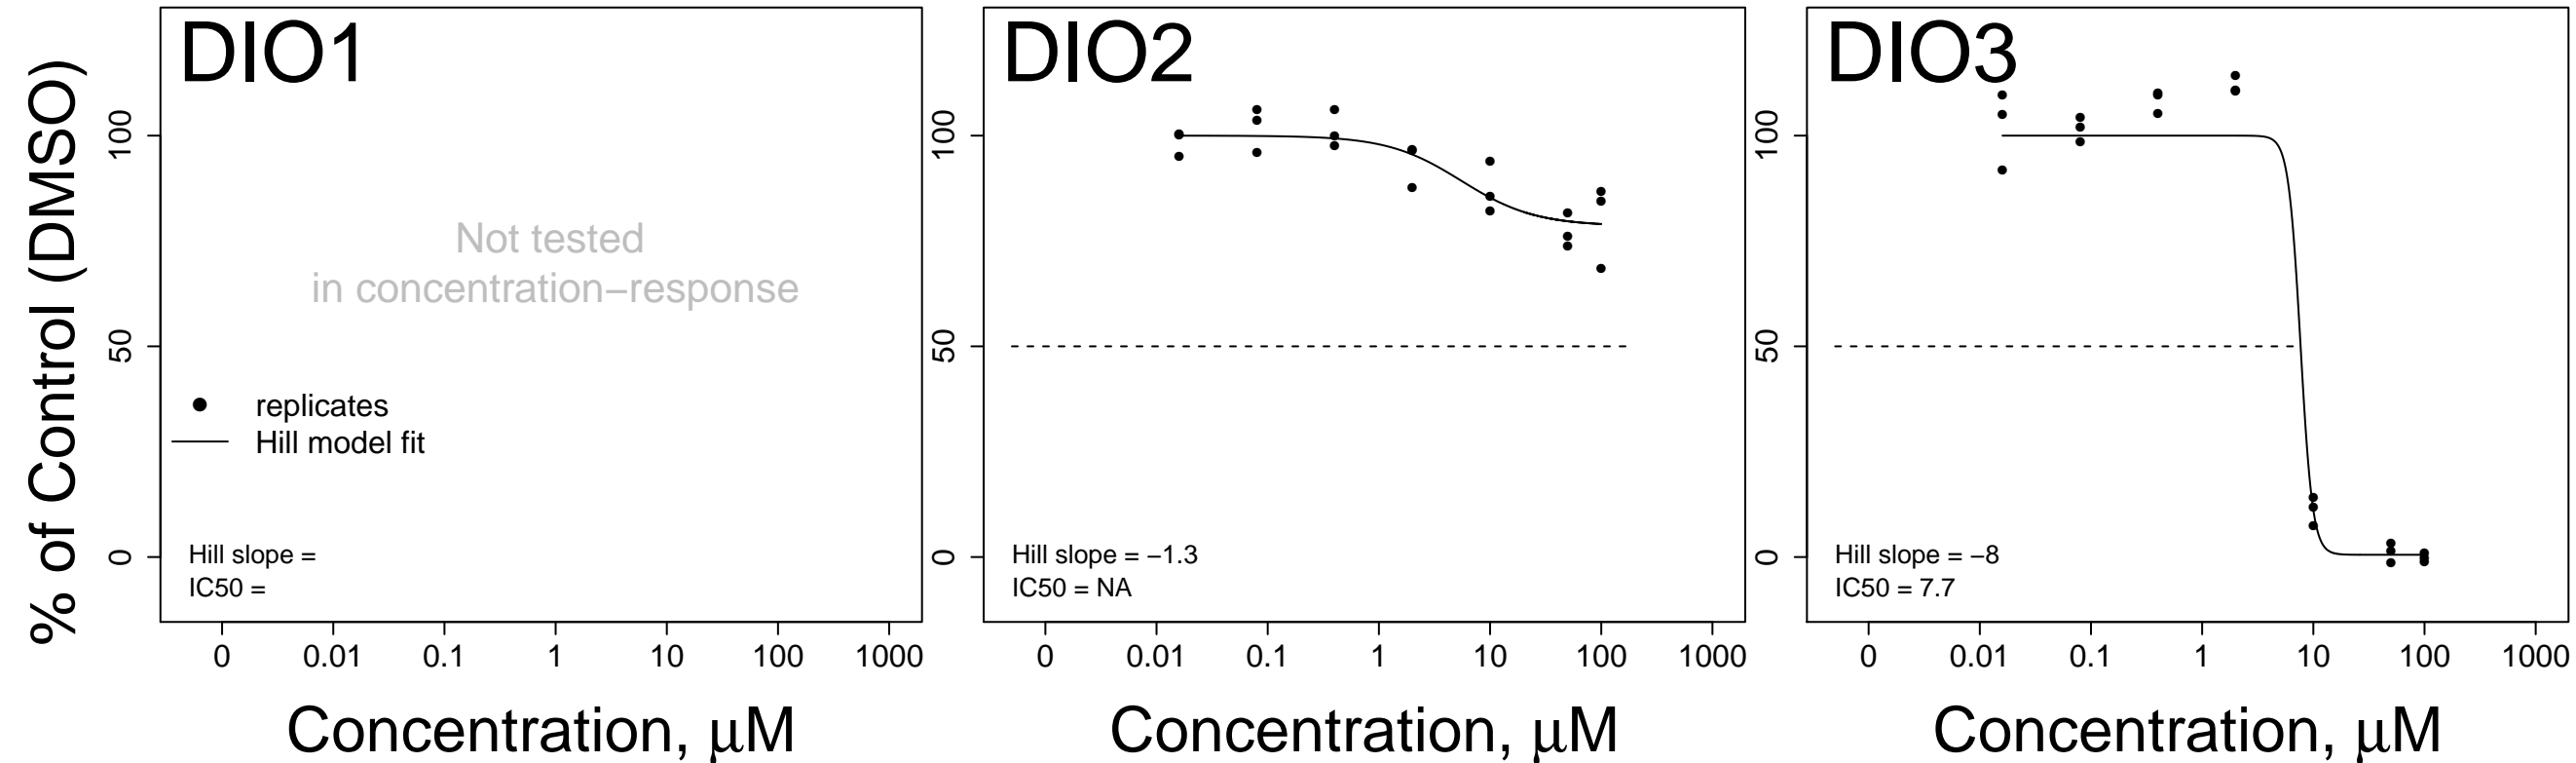



Sodium dodecylbenzenesulfonate CASRN: 25155-30-0

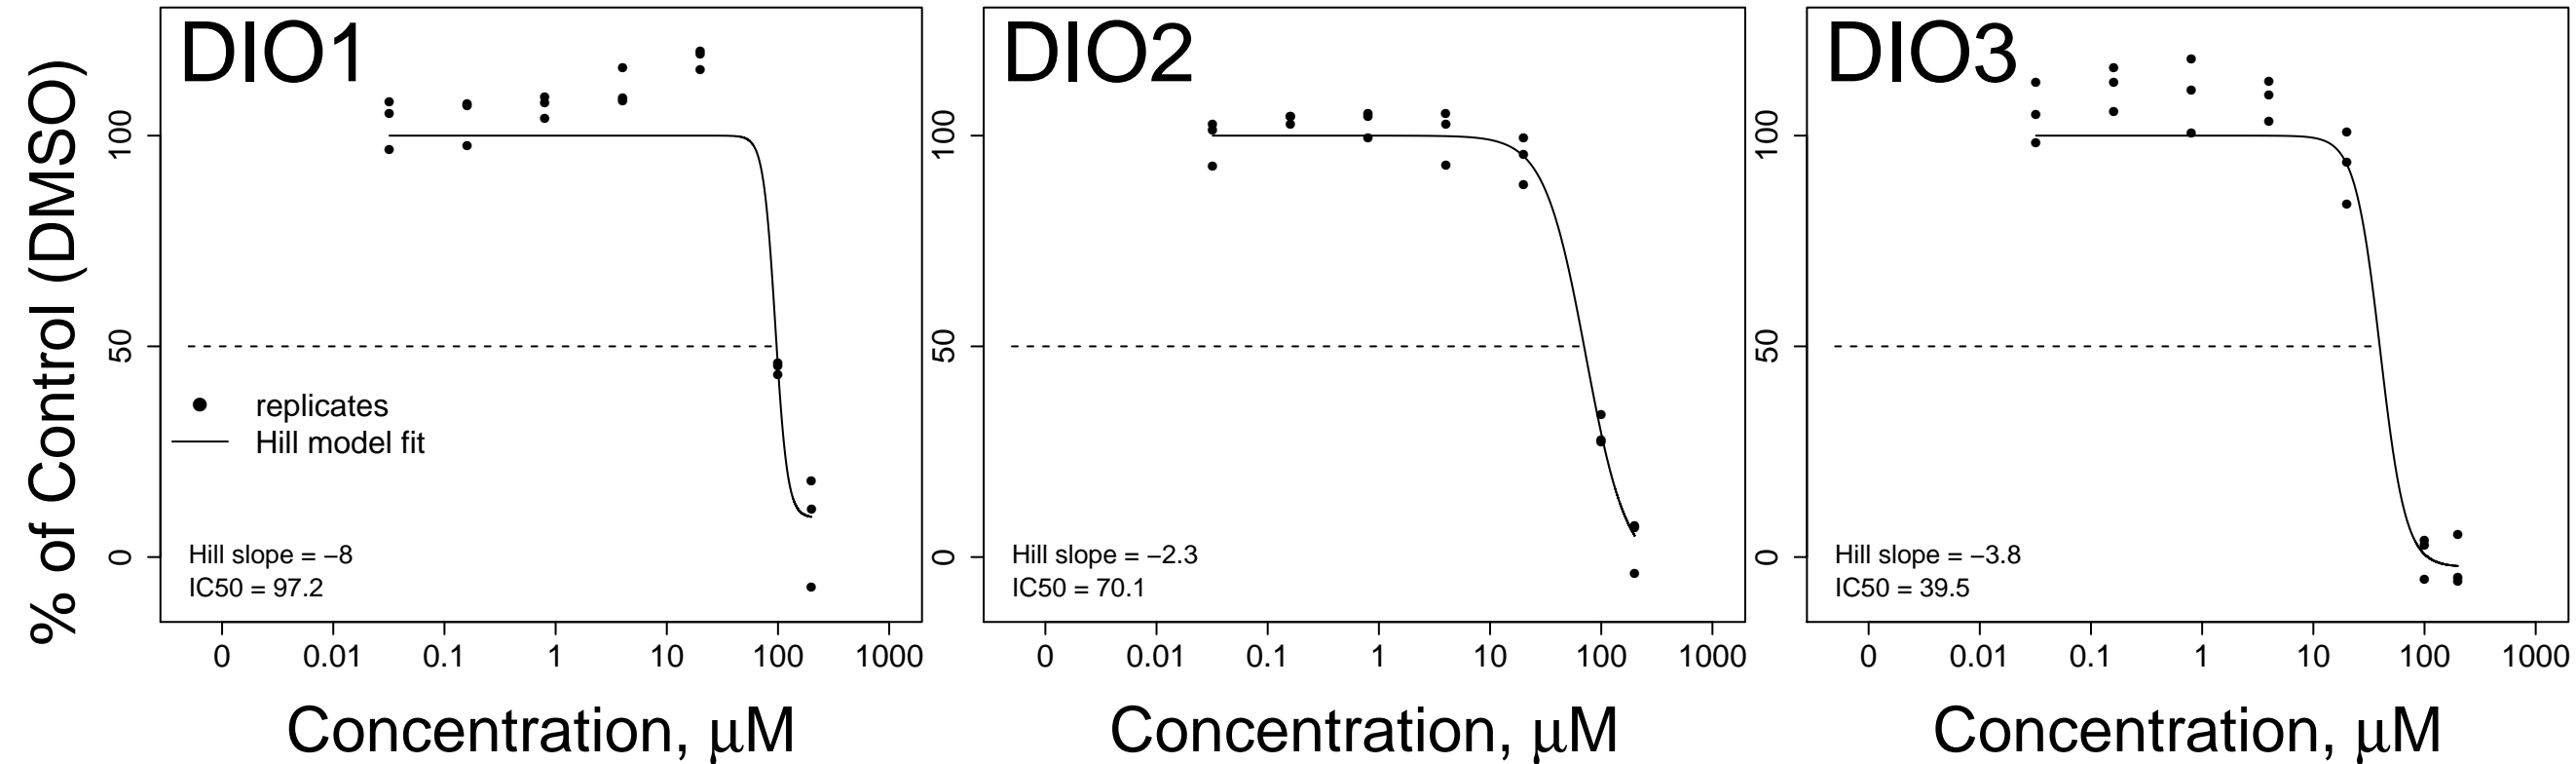

# HMR1426 CASRN: 262376-75-0

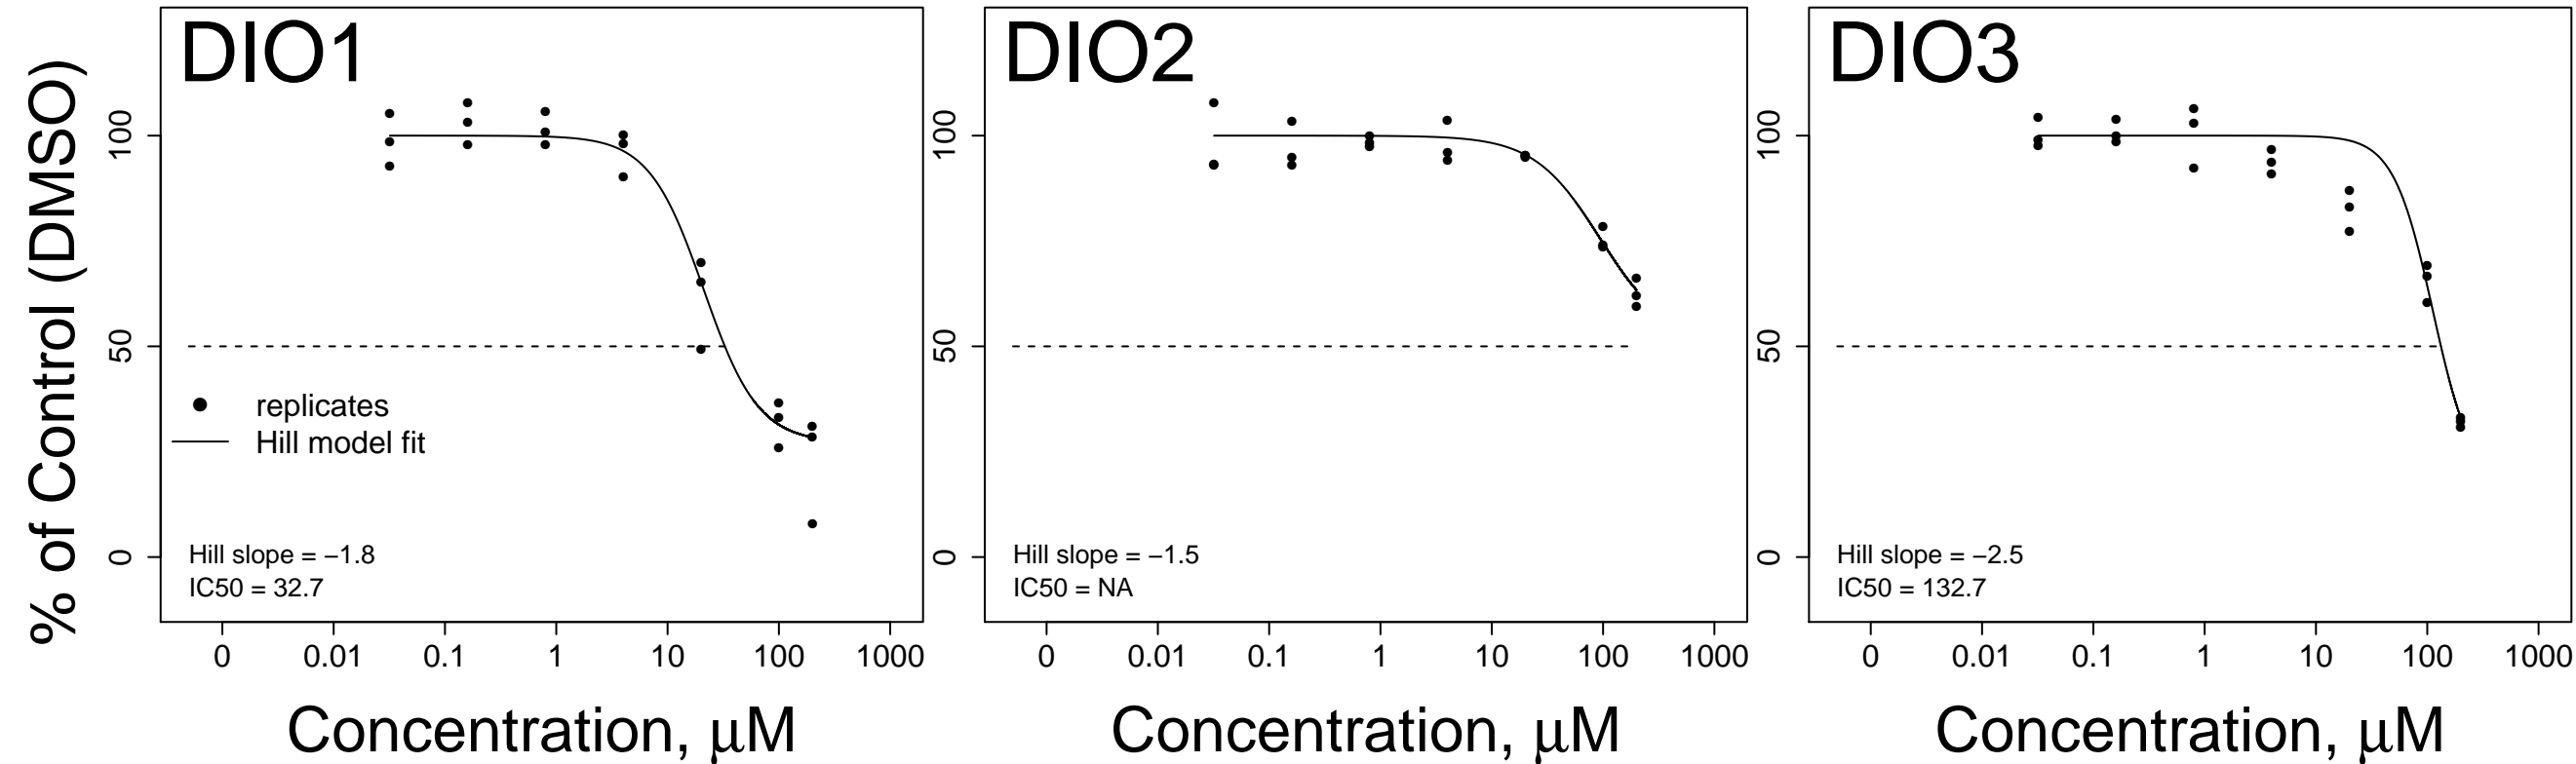

Octhilinone CASRN: 26530-20-1

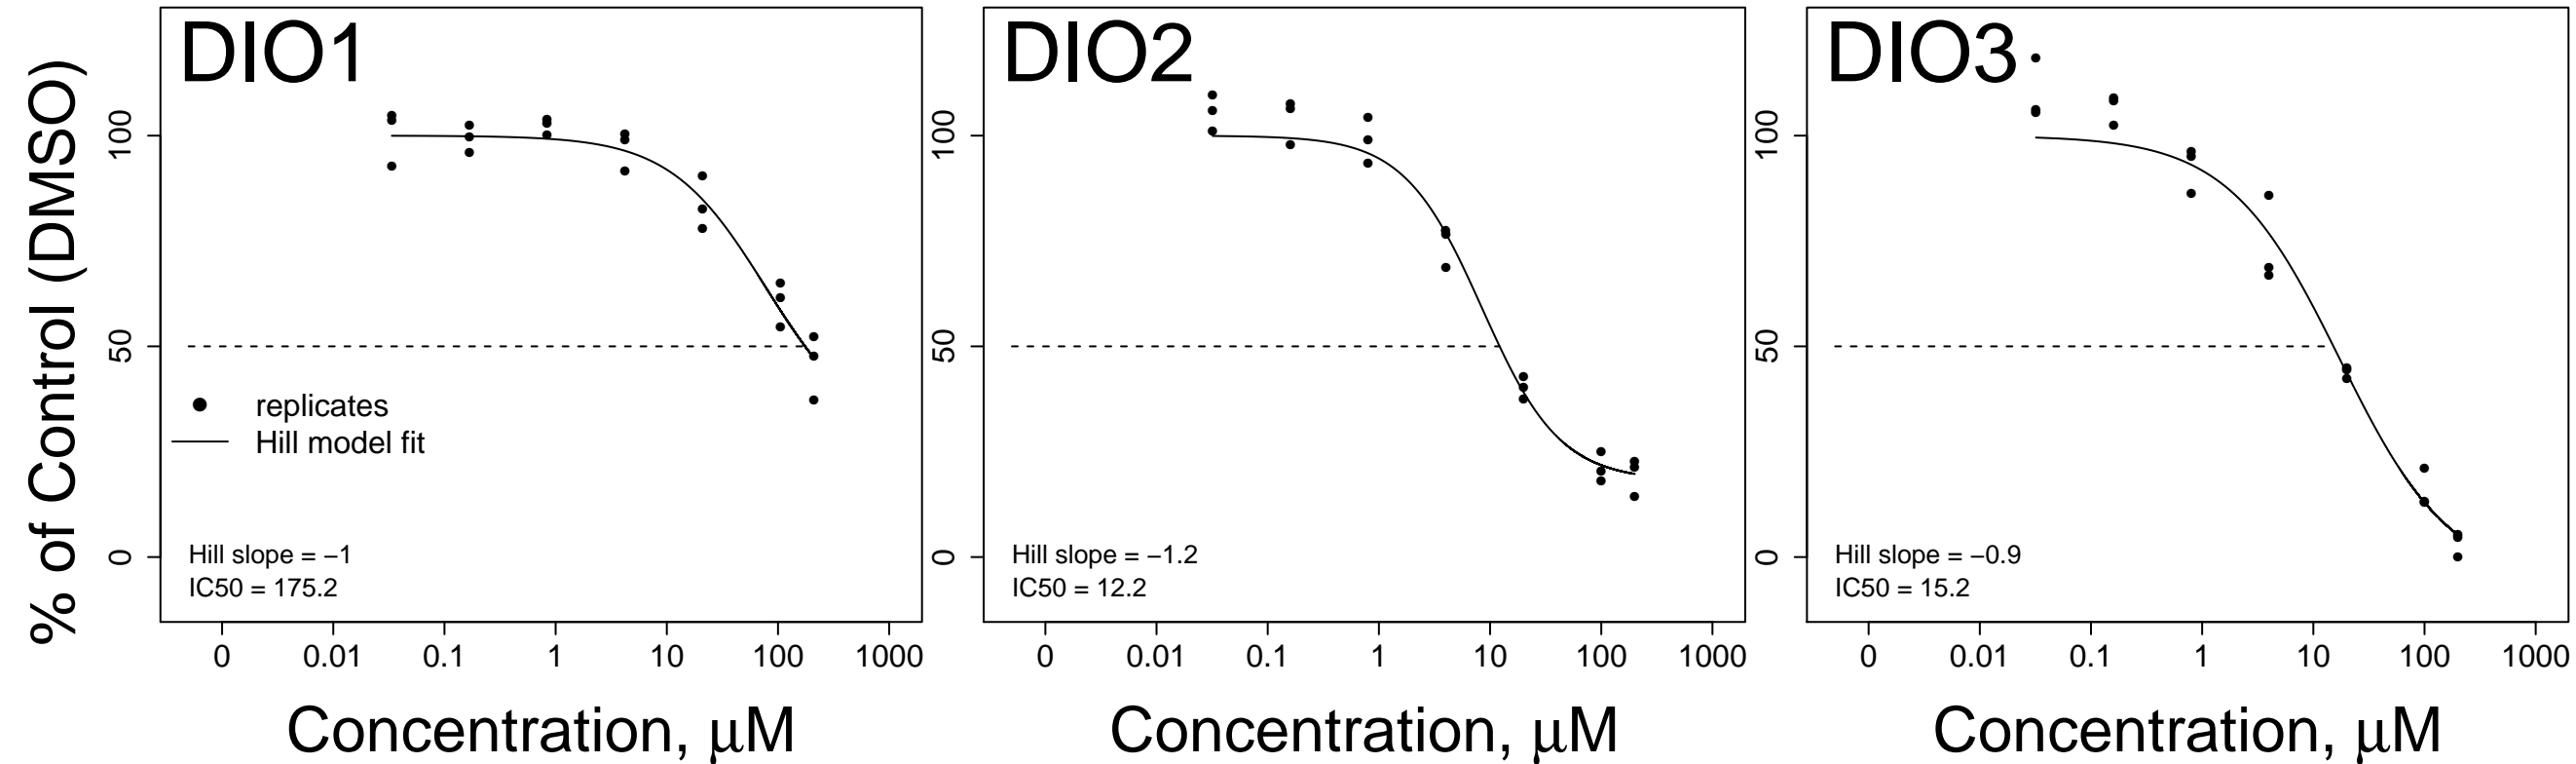

1-Dodecyl-2-pyrrolidinone CASRN: 2687-96-9

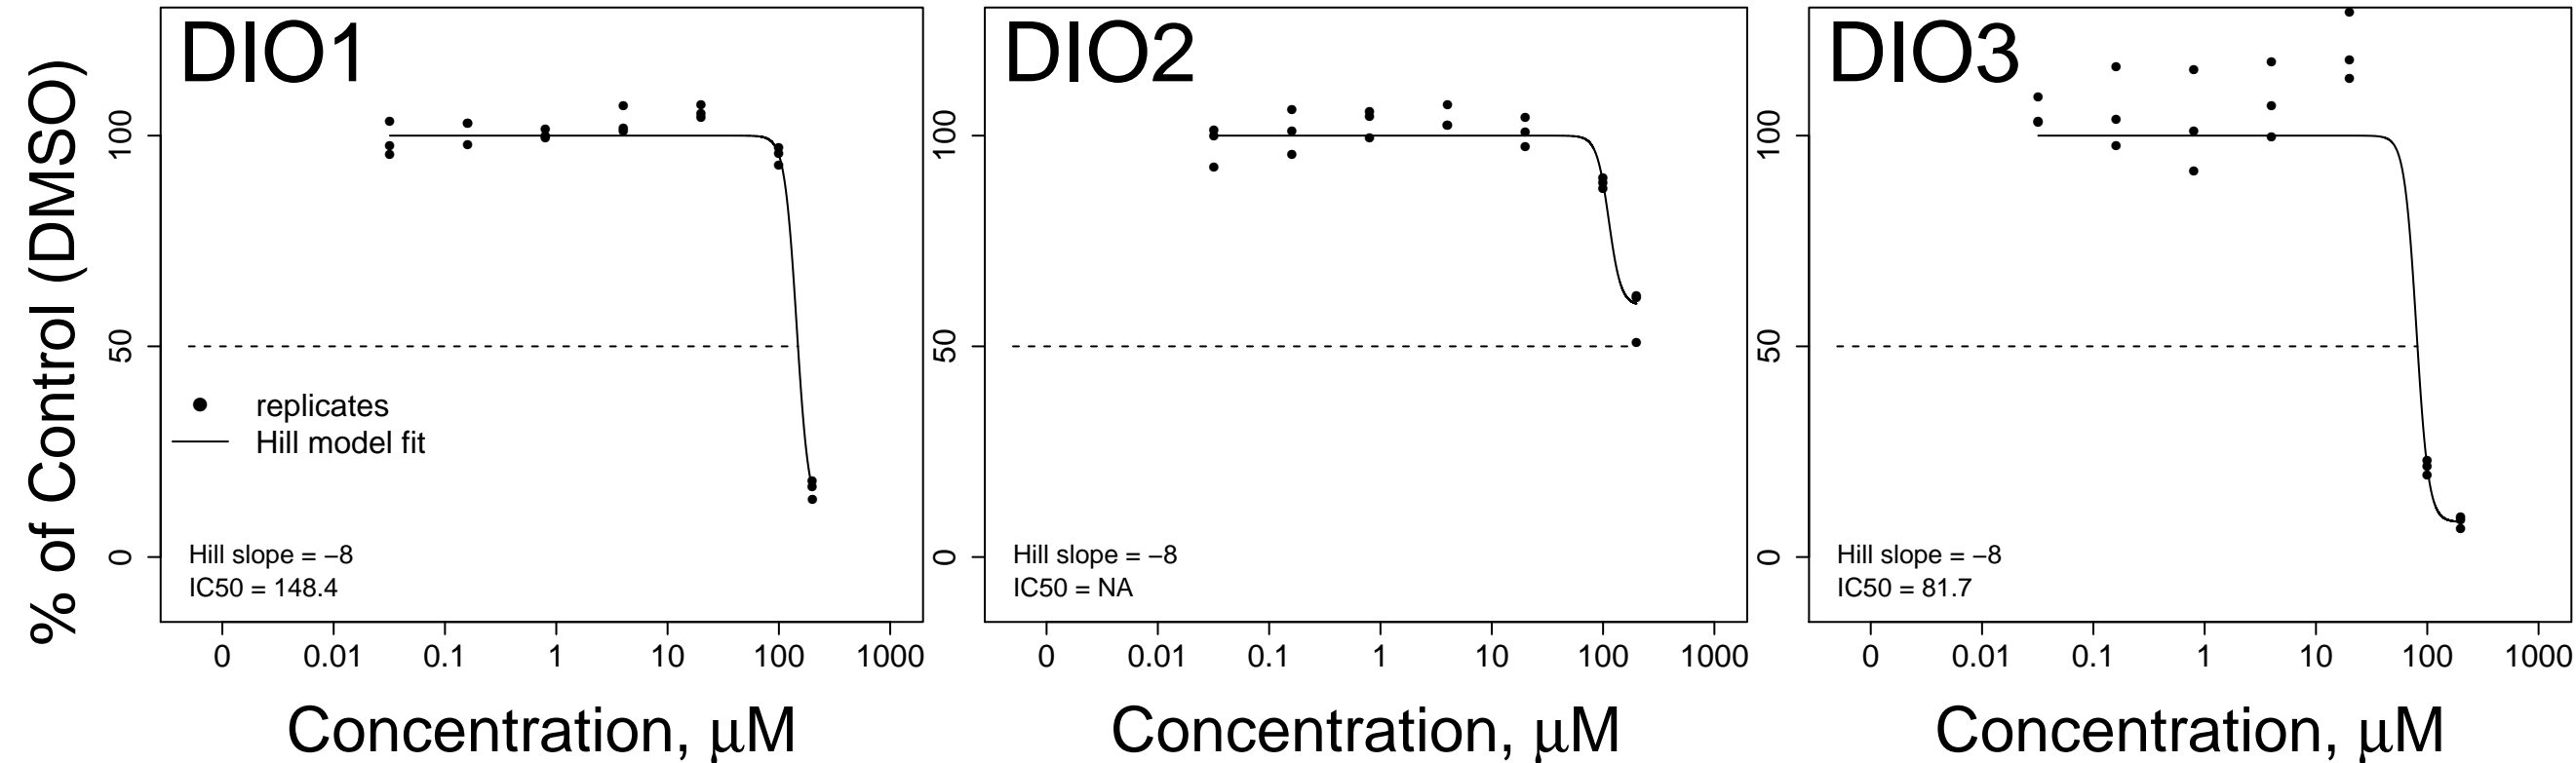

Dodecylbenzenesulfonic acid CASRN: 27176-87-0

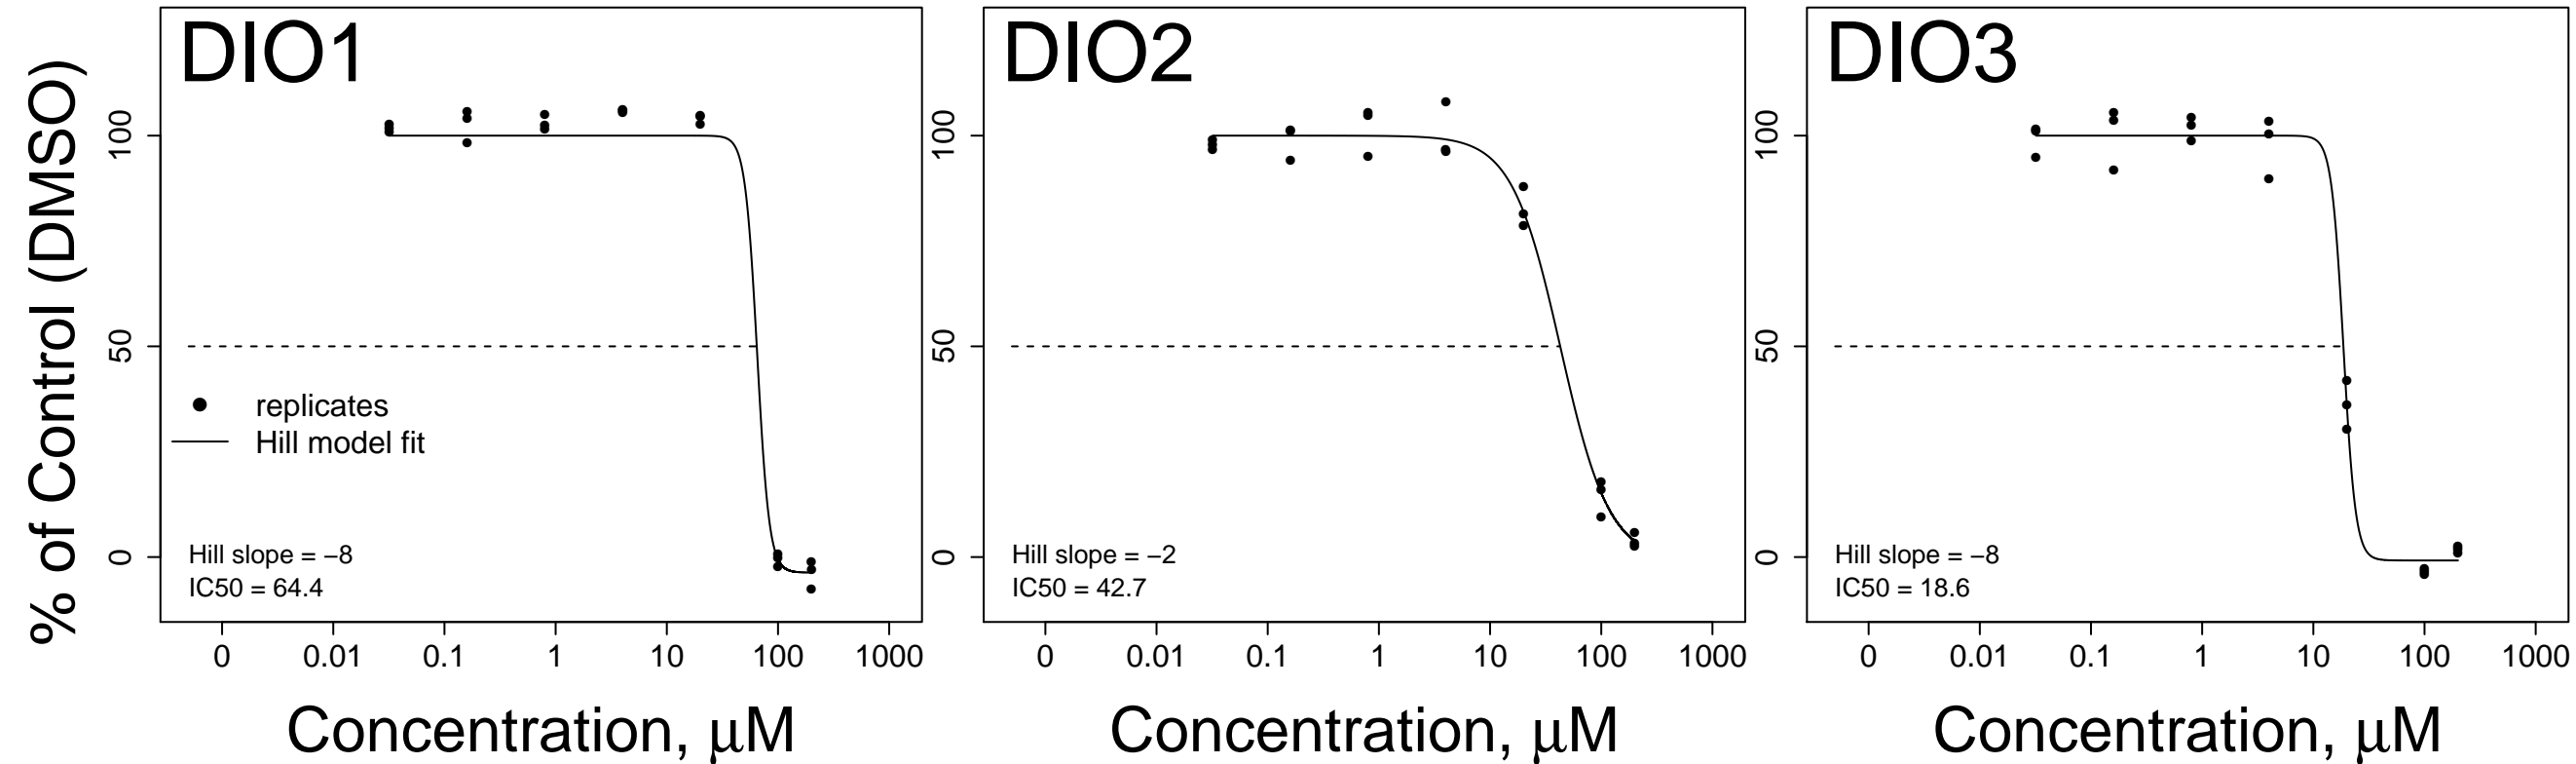

Dodecylbenzene sulfonate triethanolamine(1:1) CASRN: 27323-41-7

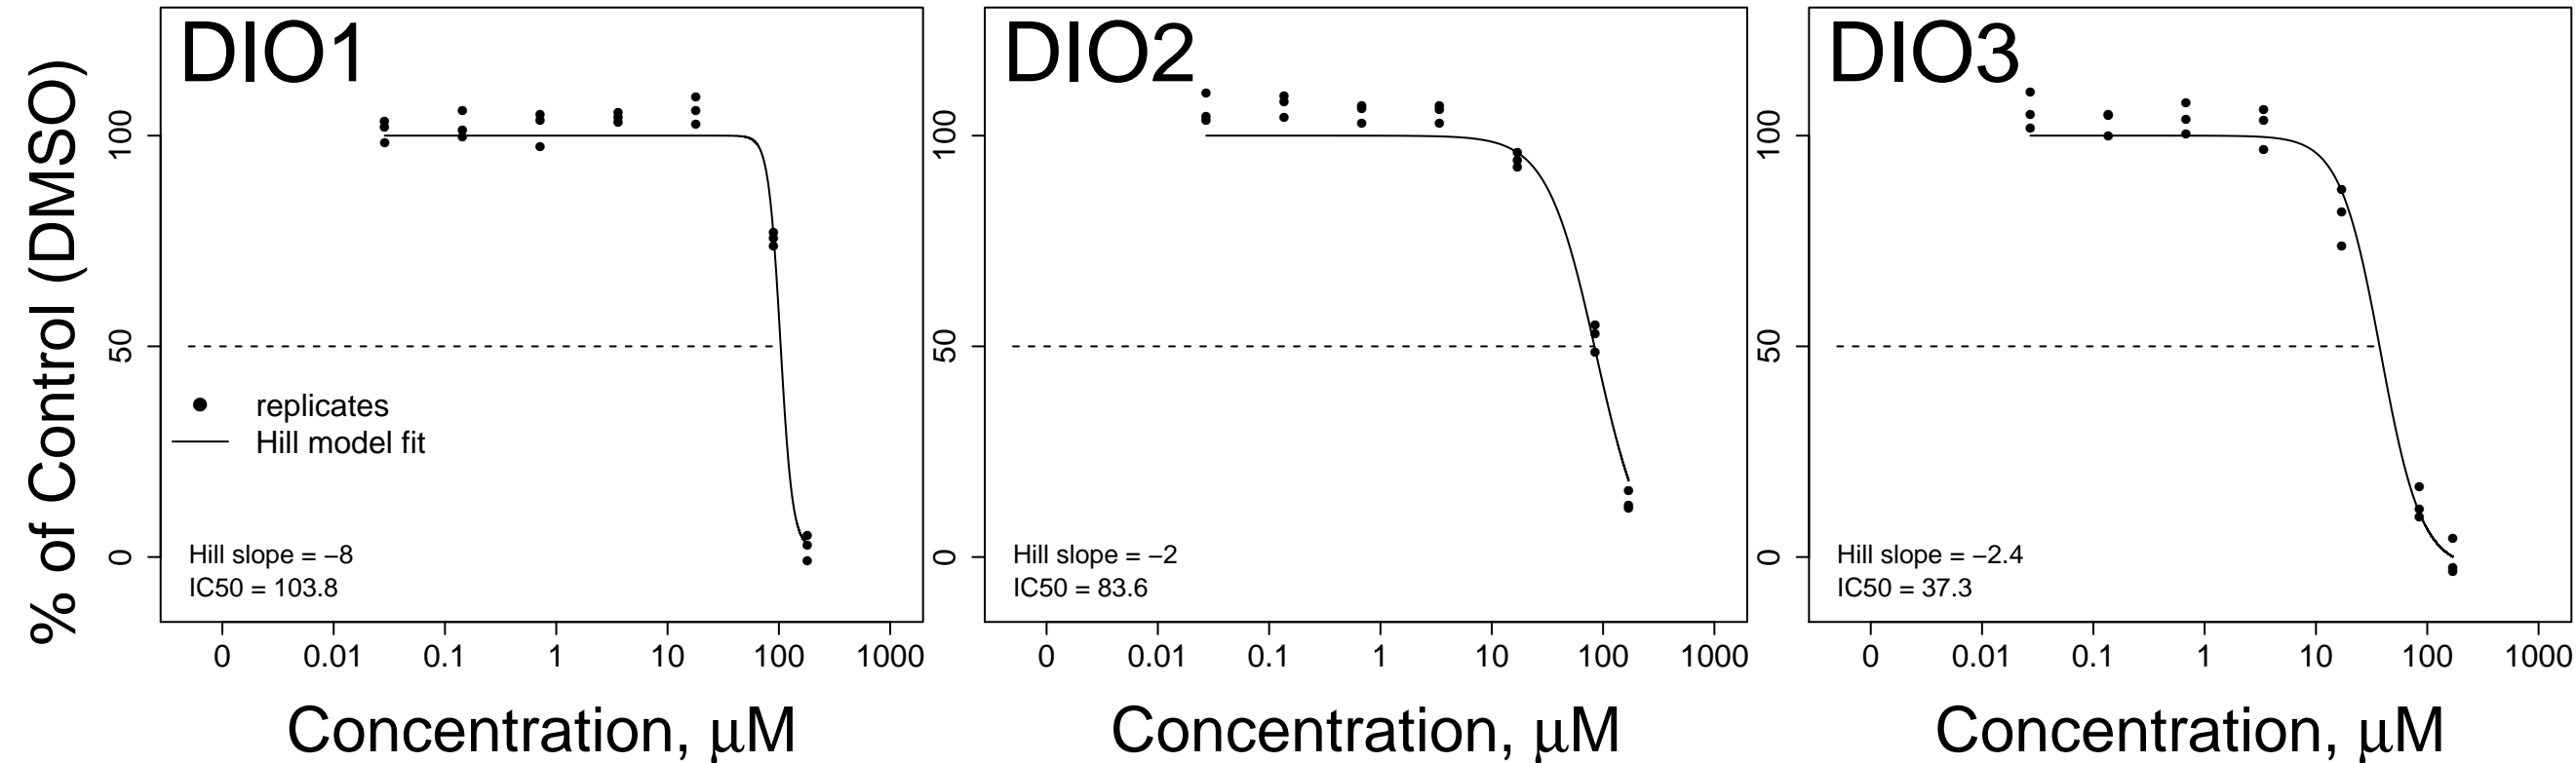

2,4-Bis(1-methyl-1-phenylethyl)phenol CASRN: 2772-45-4

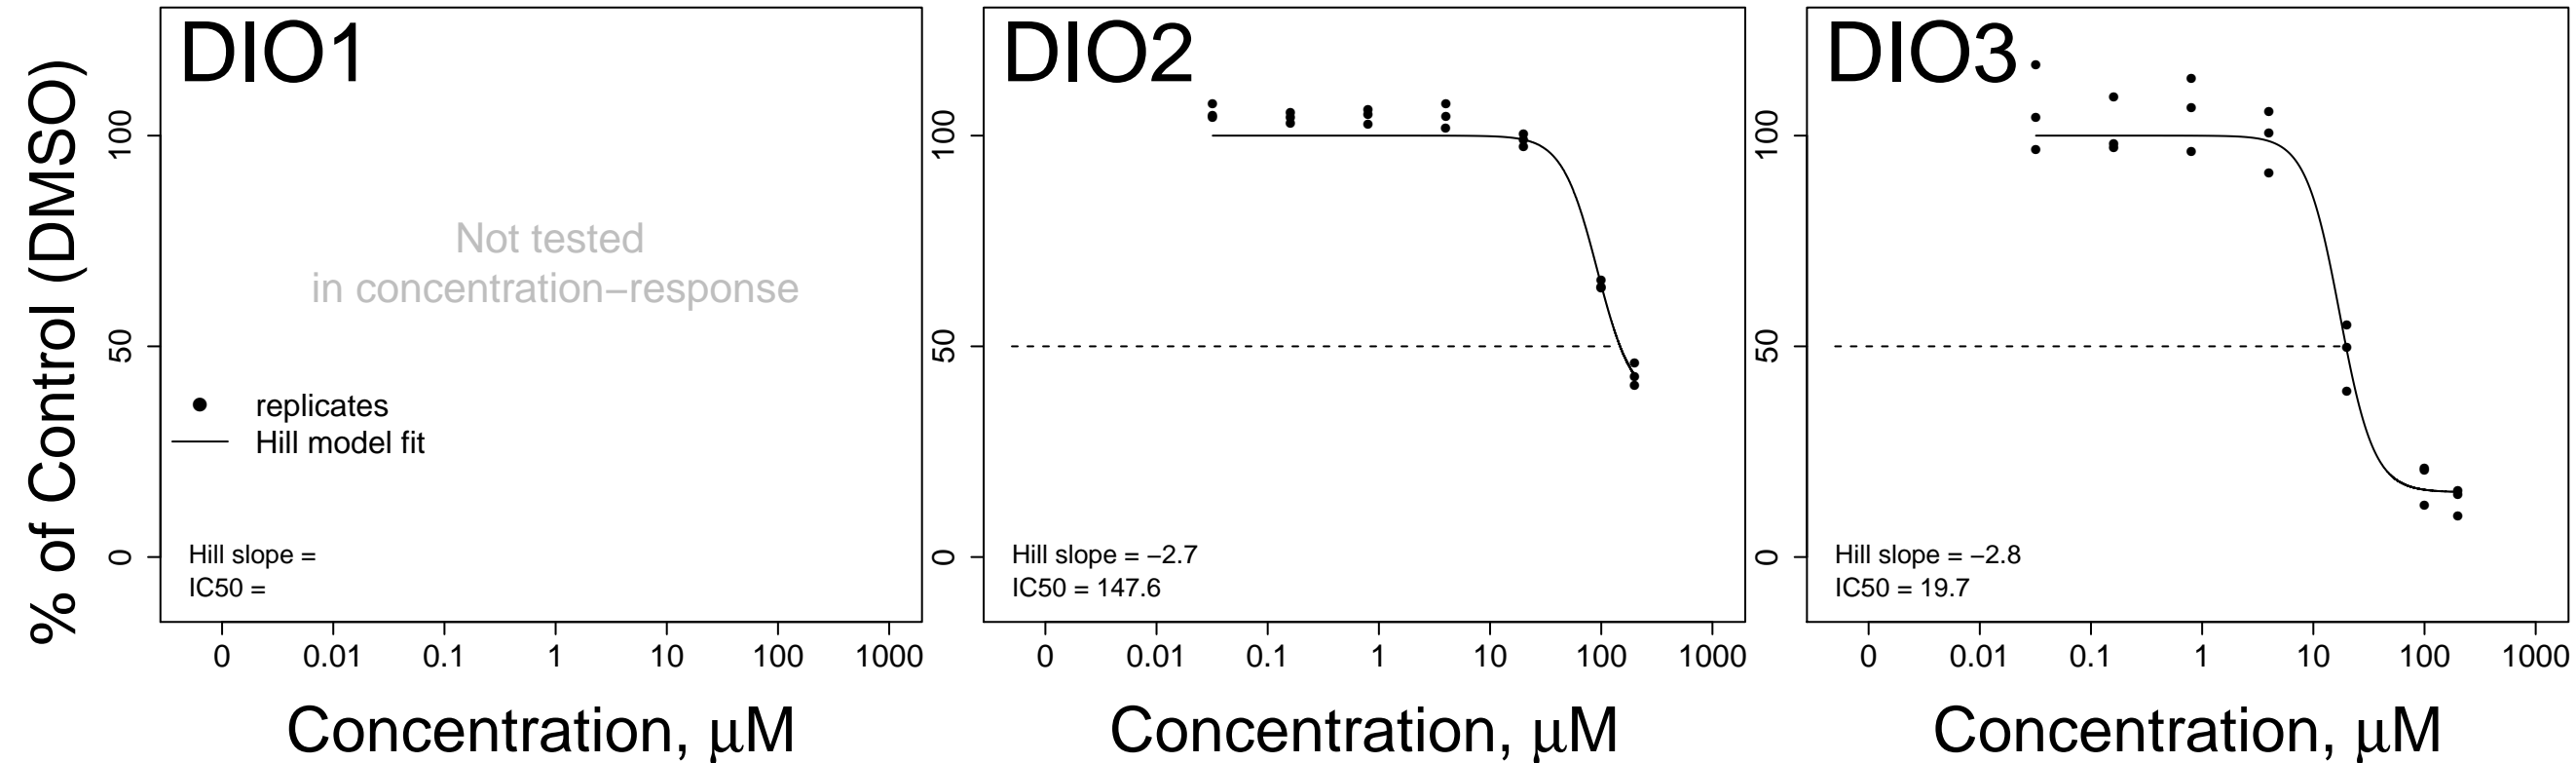

PFOS-K CASRN: 2795-39-3

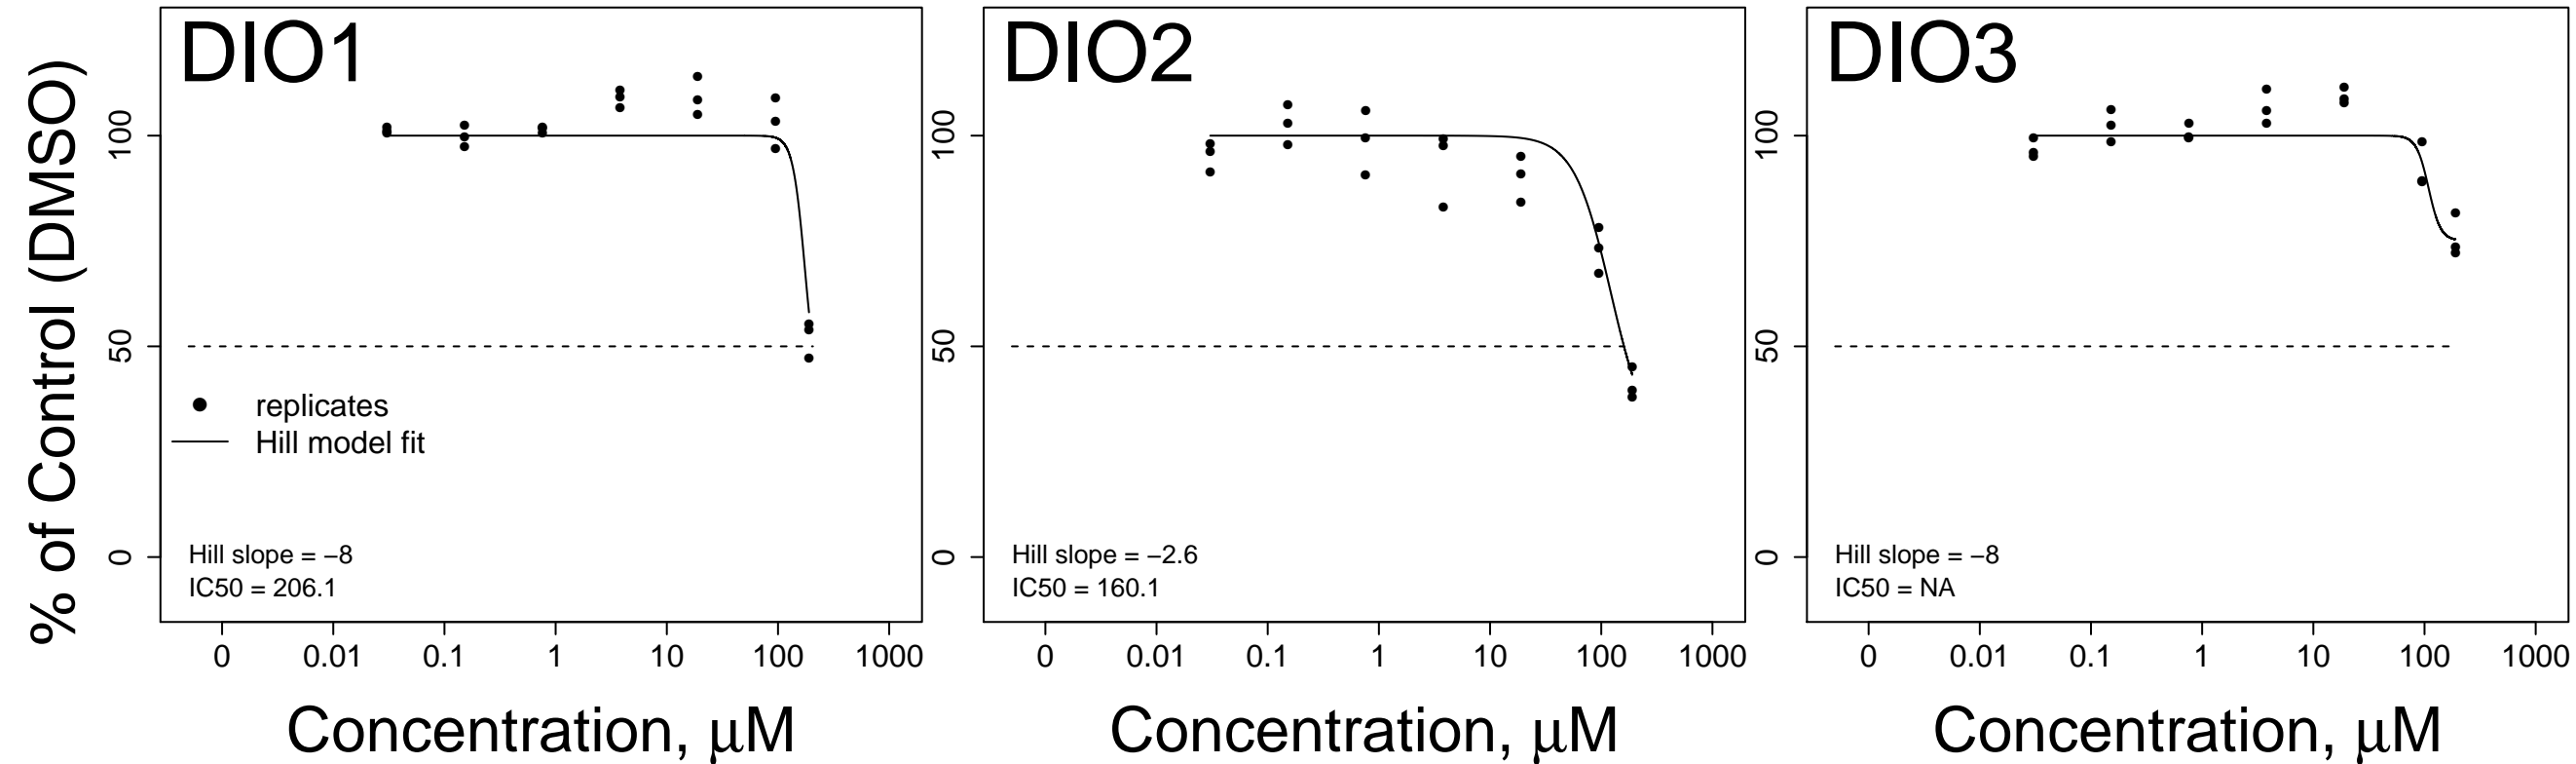



UK-373911 CASRN: 291305-06-1

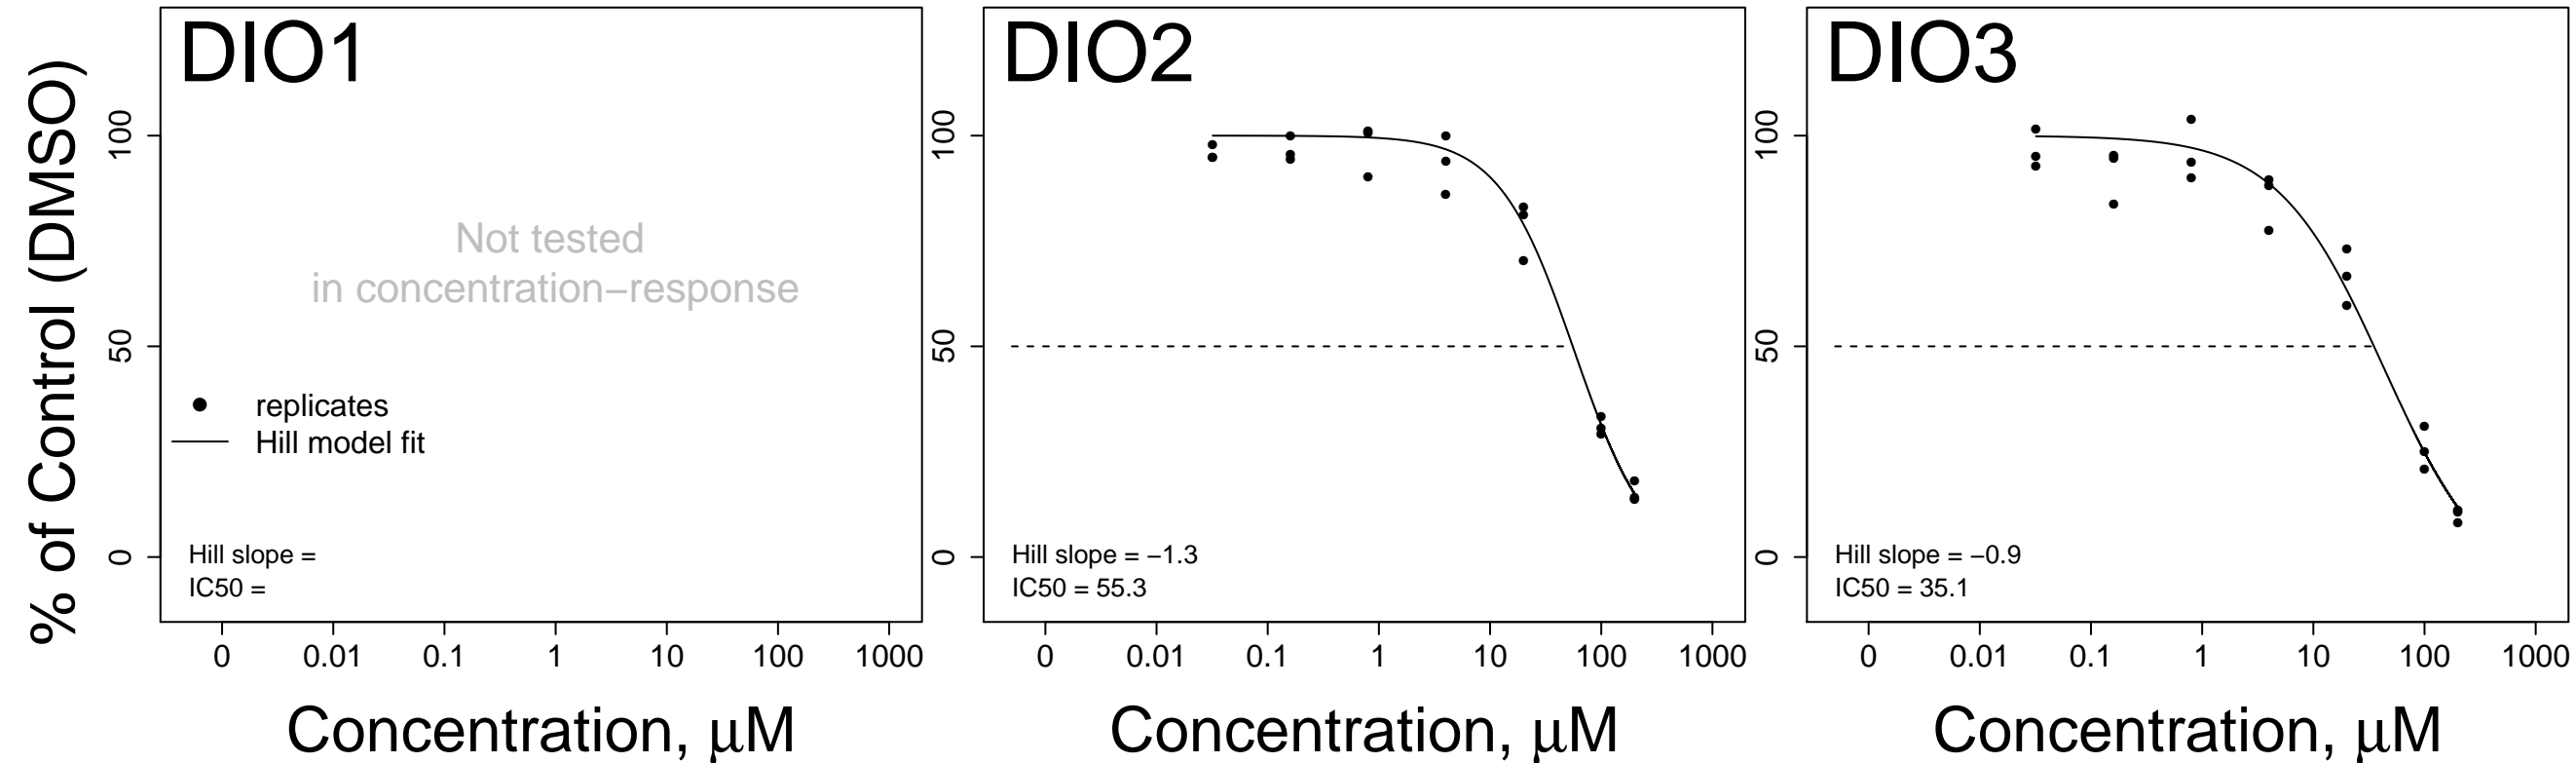

Isooctyl acrylate CASRN: 29590-42-9

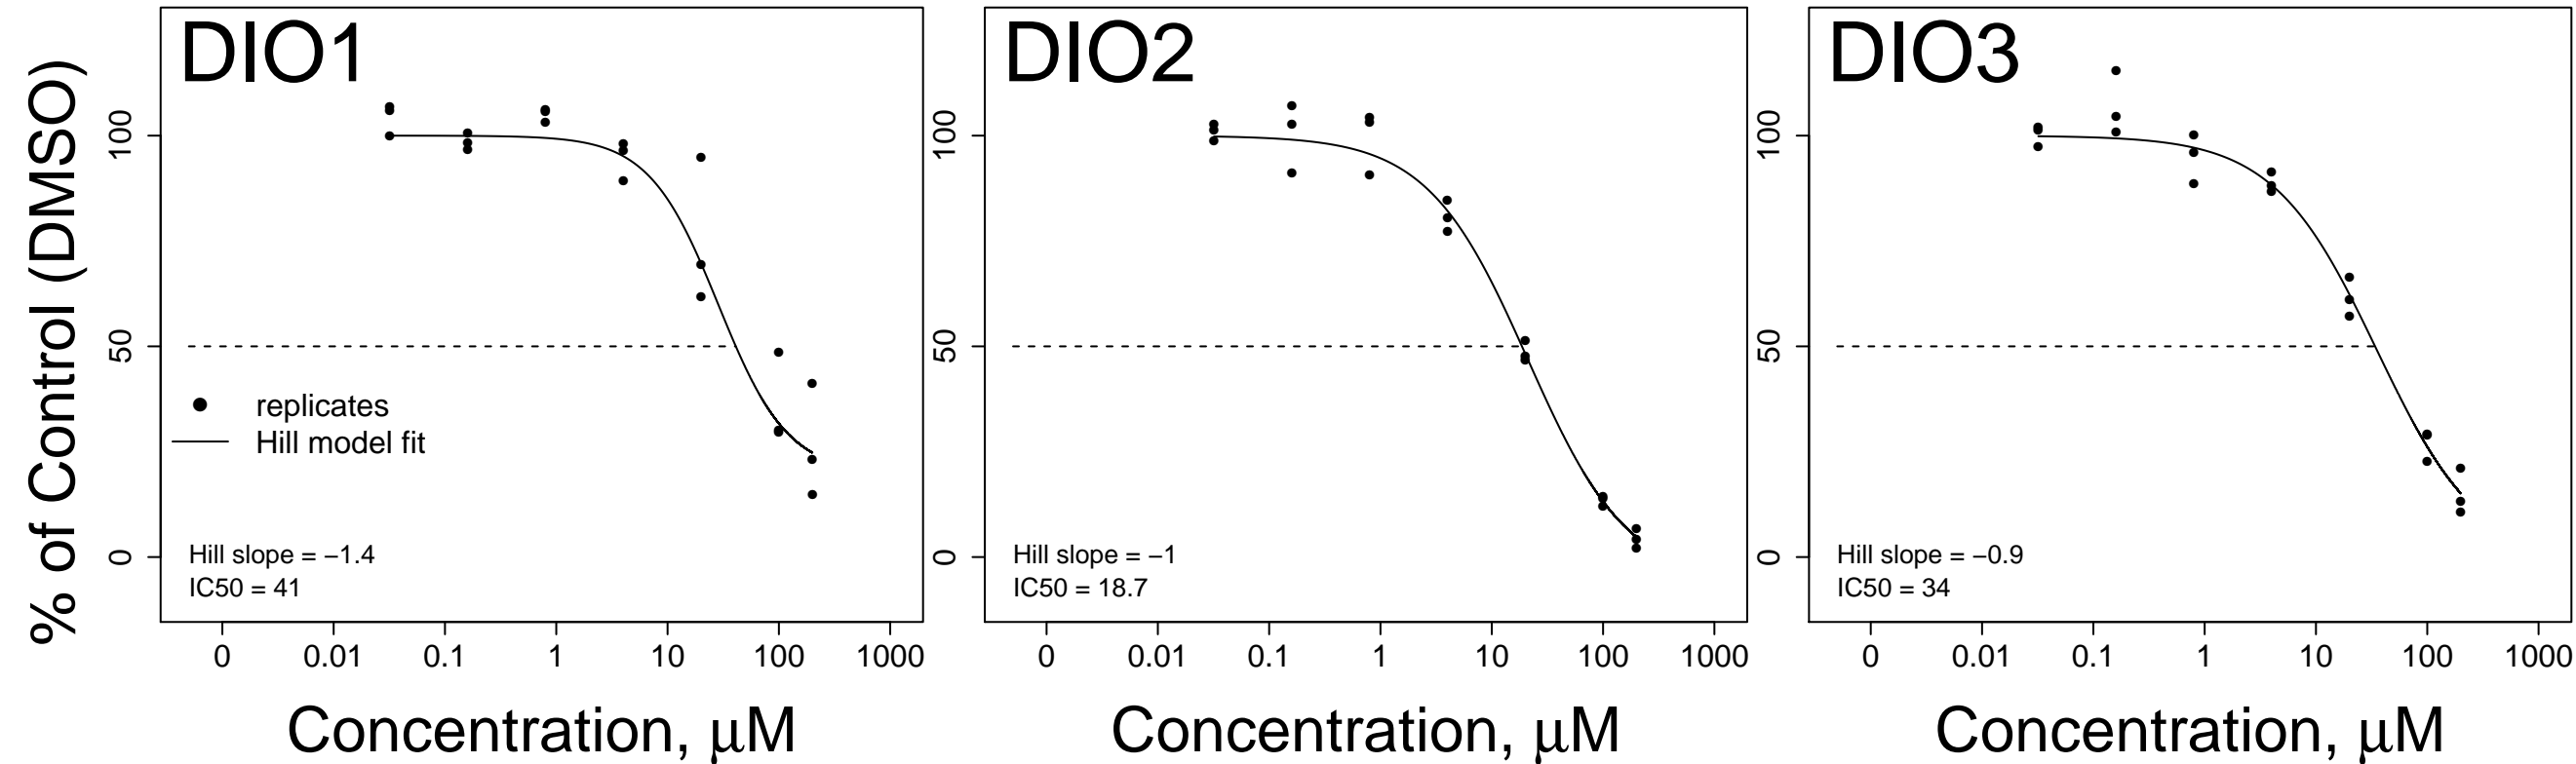

all-trans-Retinoic acid CASRN: 302-79-4

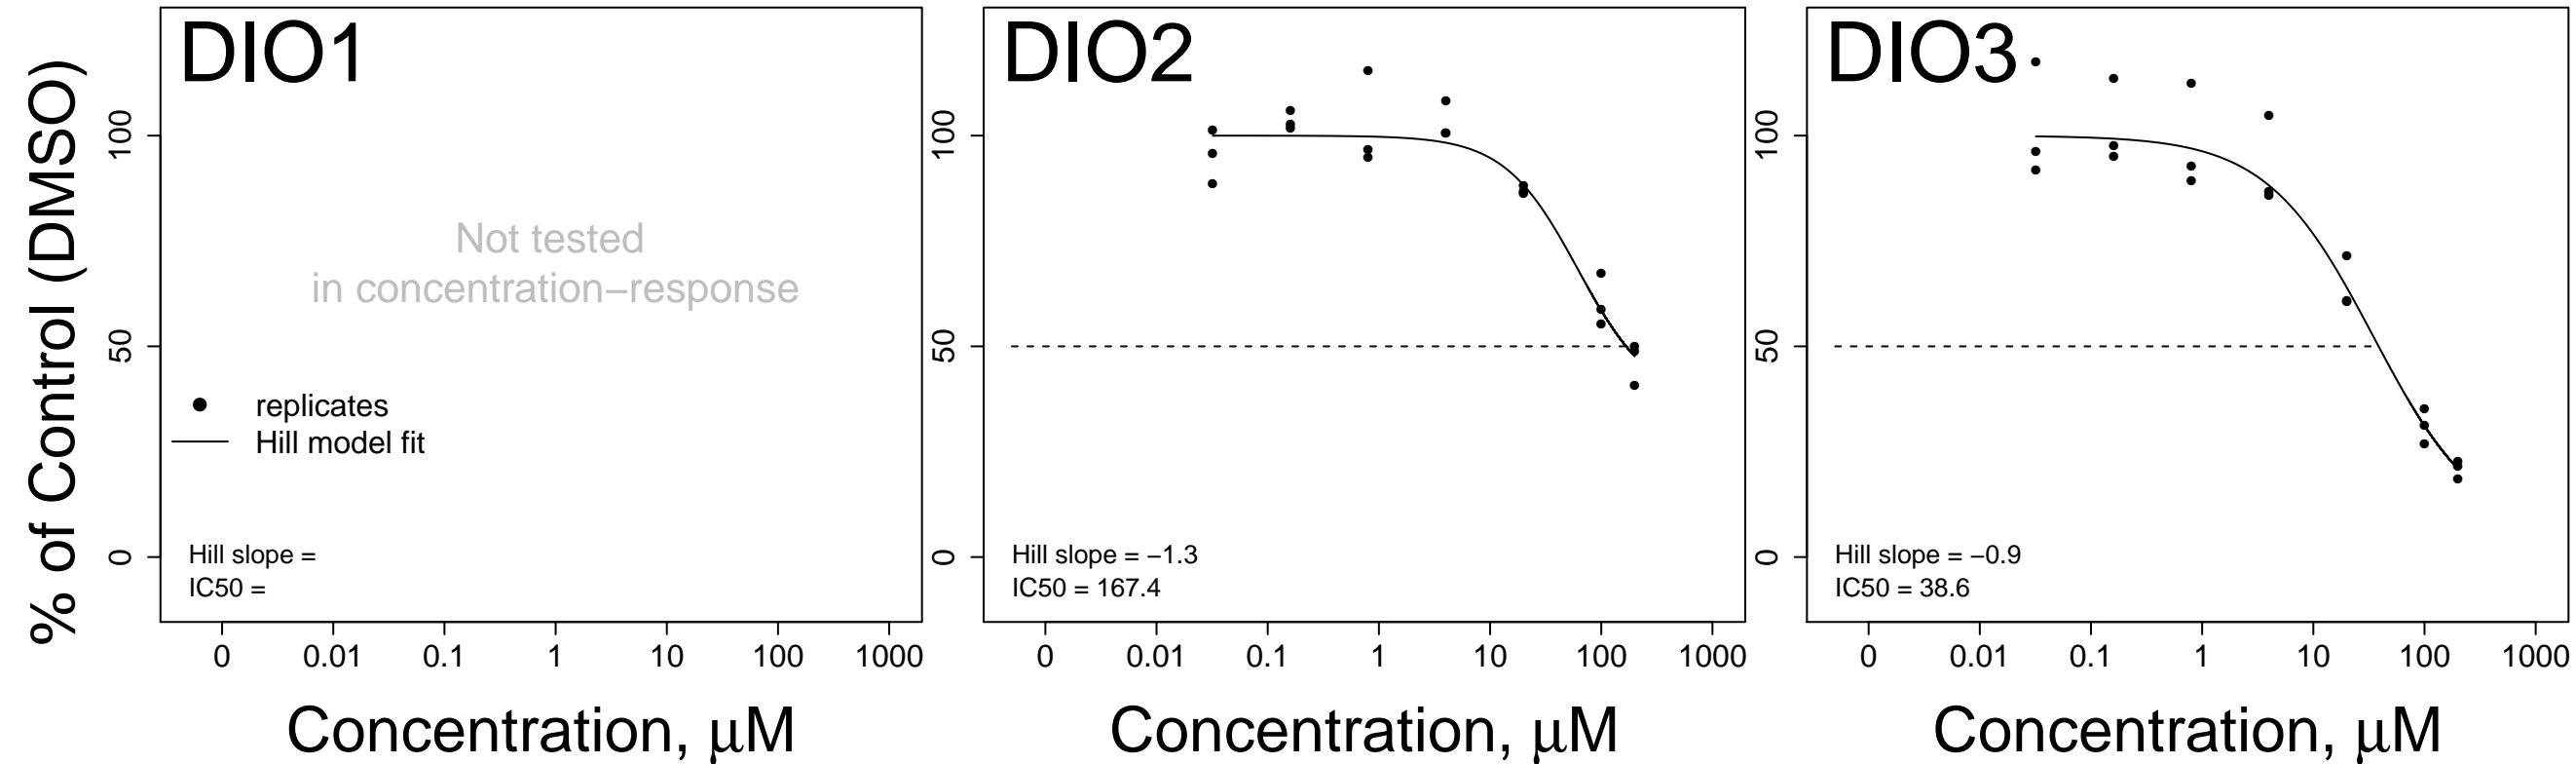

Procymidone CASRN: 32809-16-8

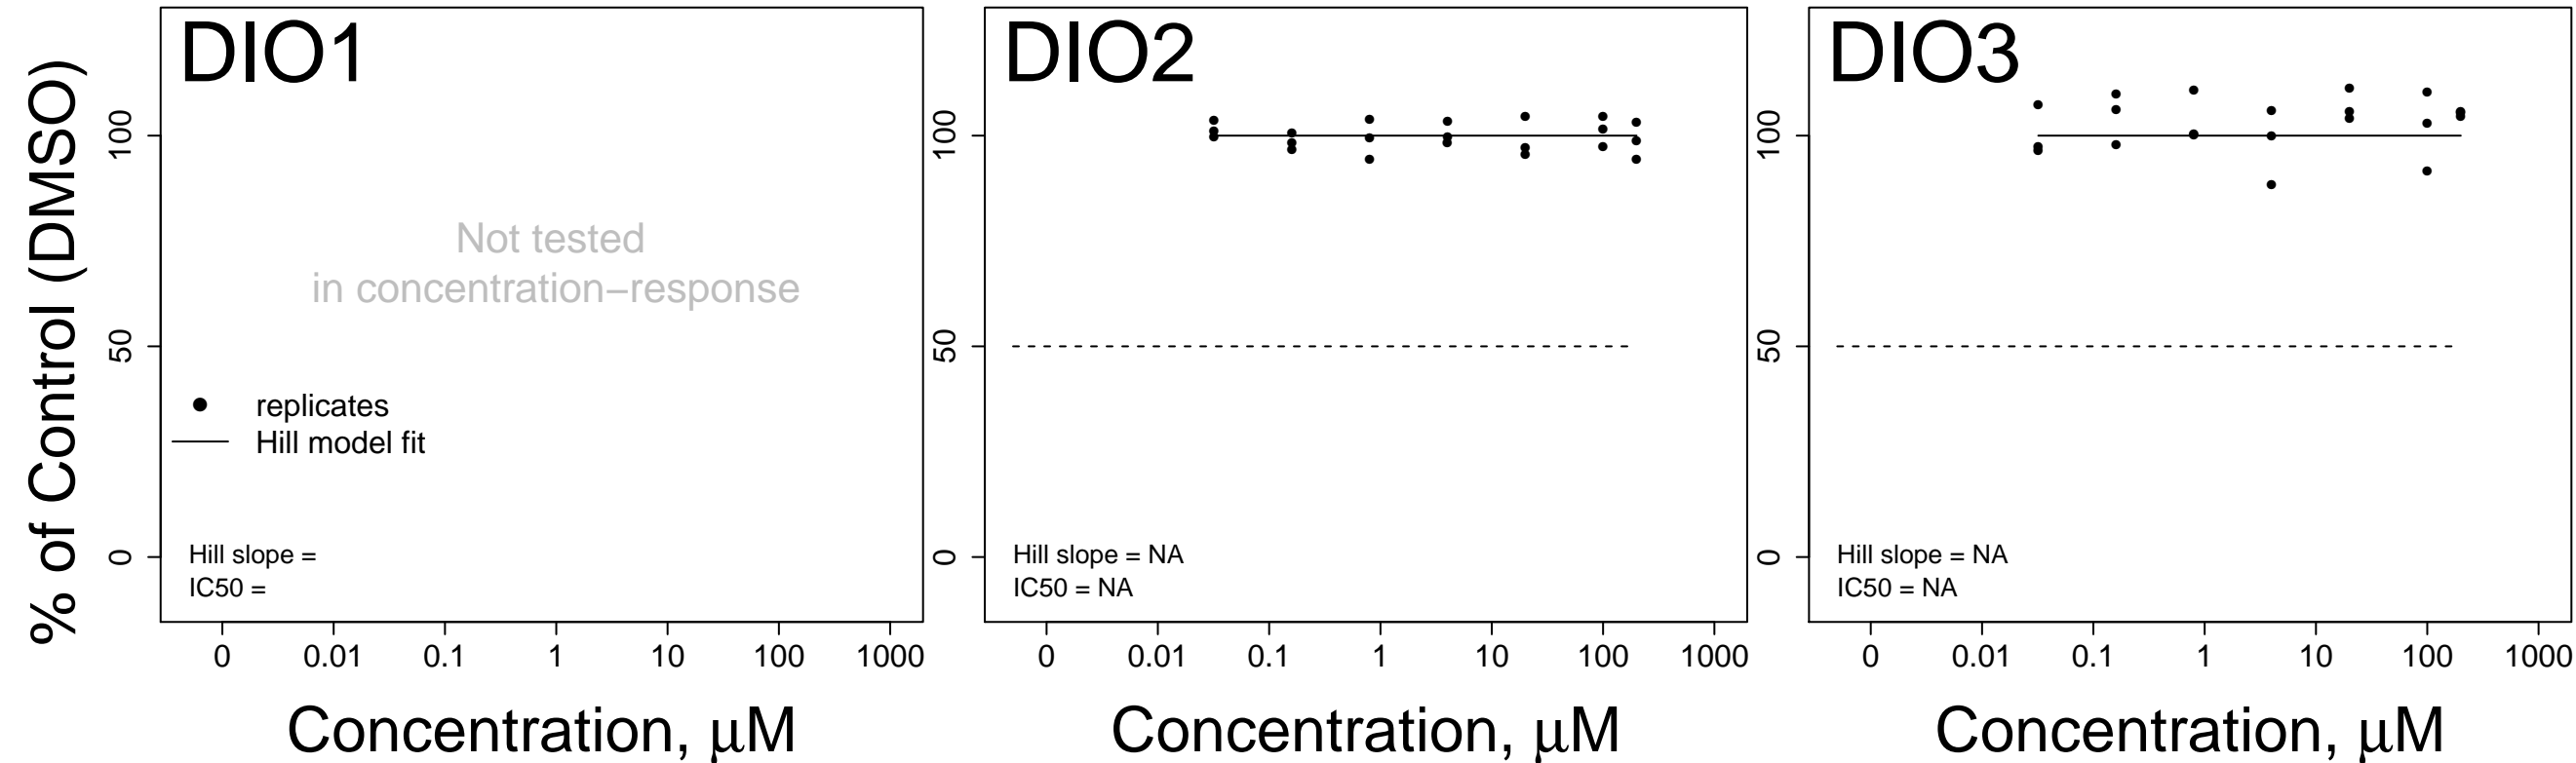

PFDA CASRN: 335-76-2

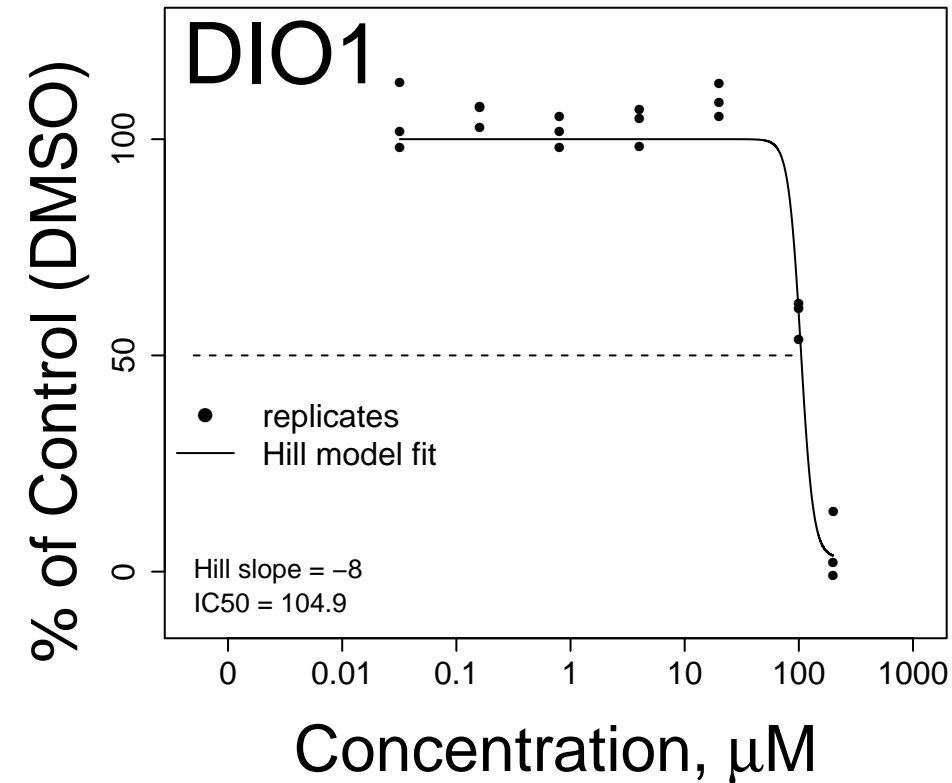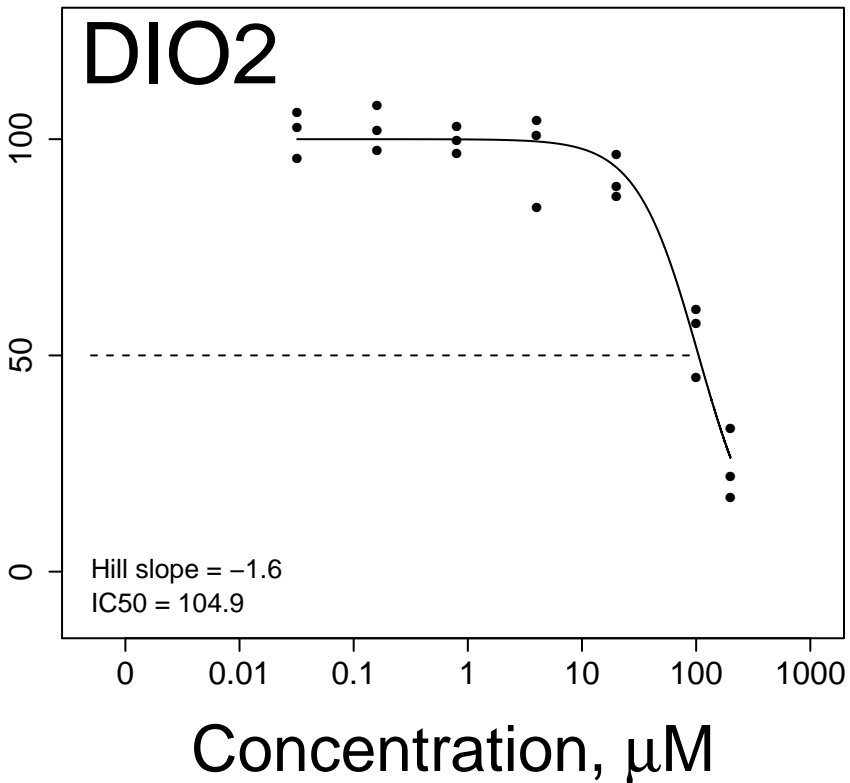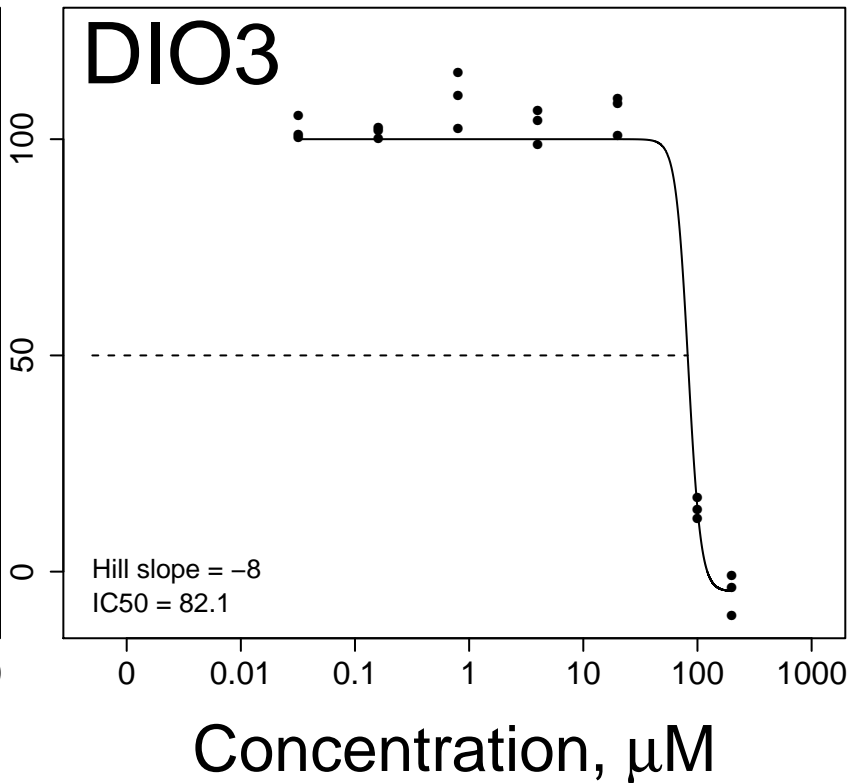

# SSR69071 CASRN: 344930-95-6

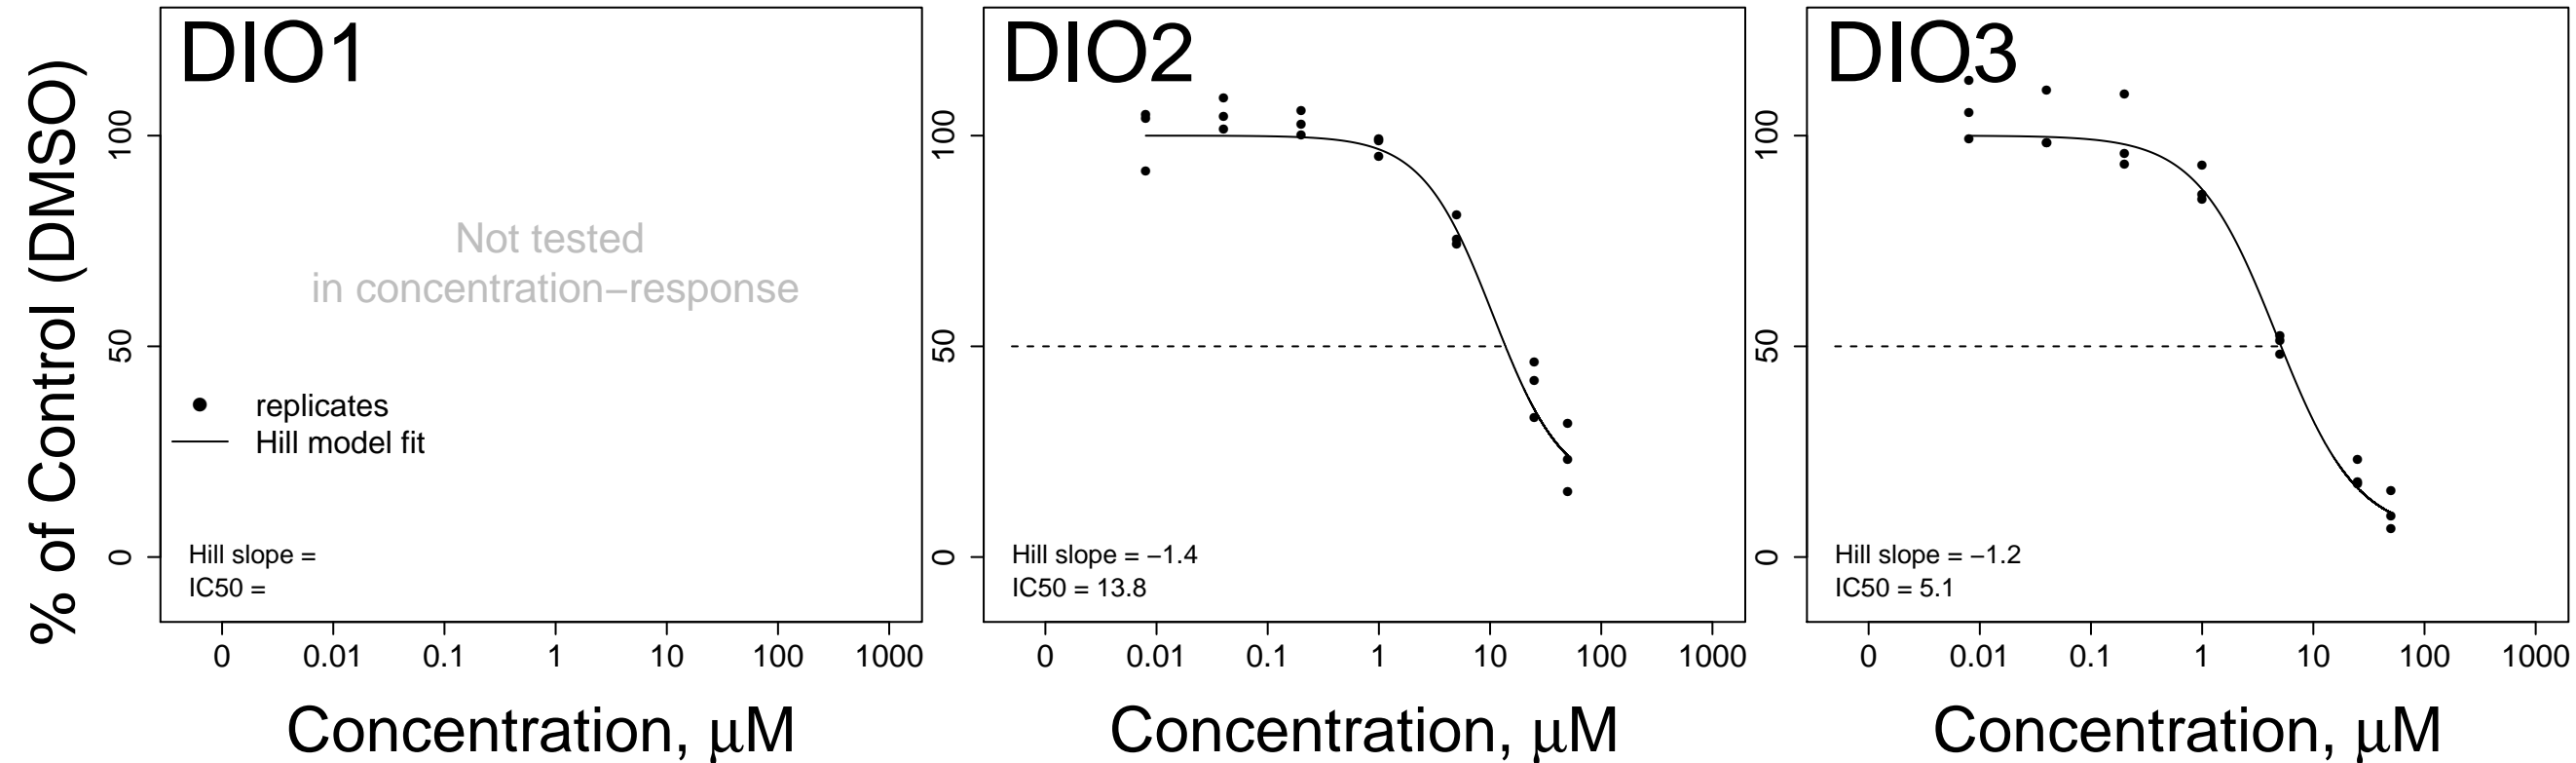

Elzasonan CASRN: 361343-19-3

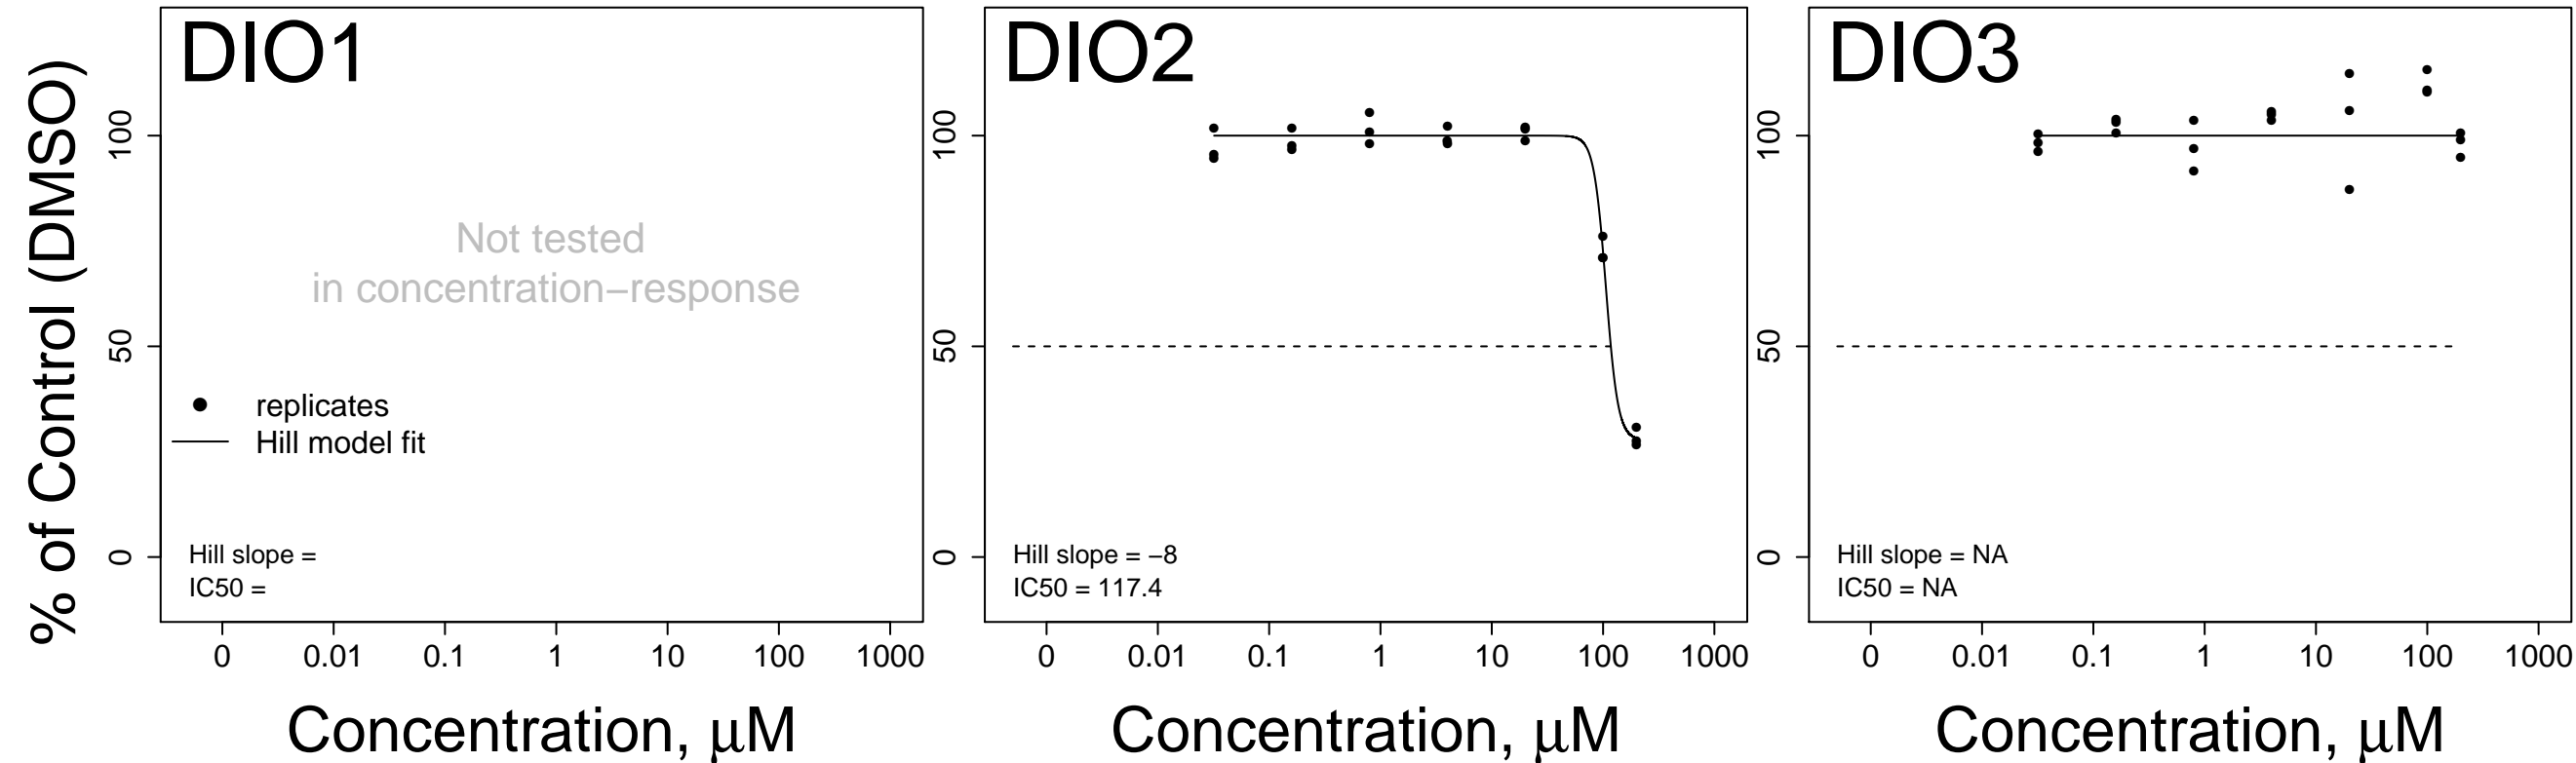

1-Hexadecanol CASRN: 36653-82-4

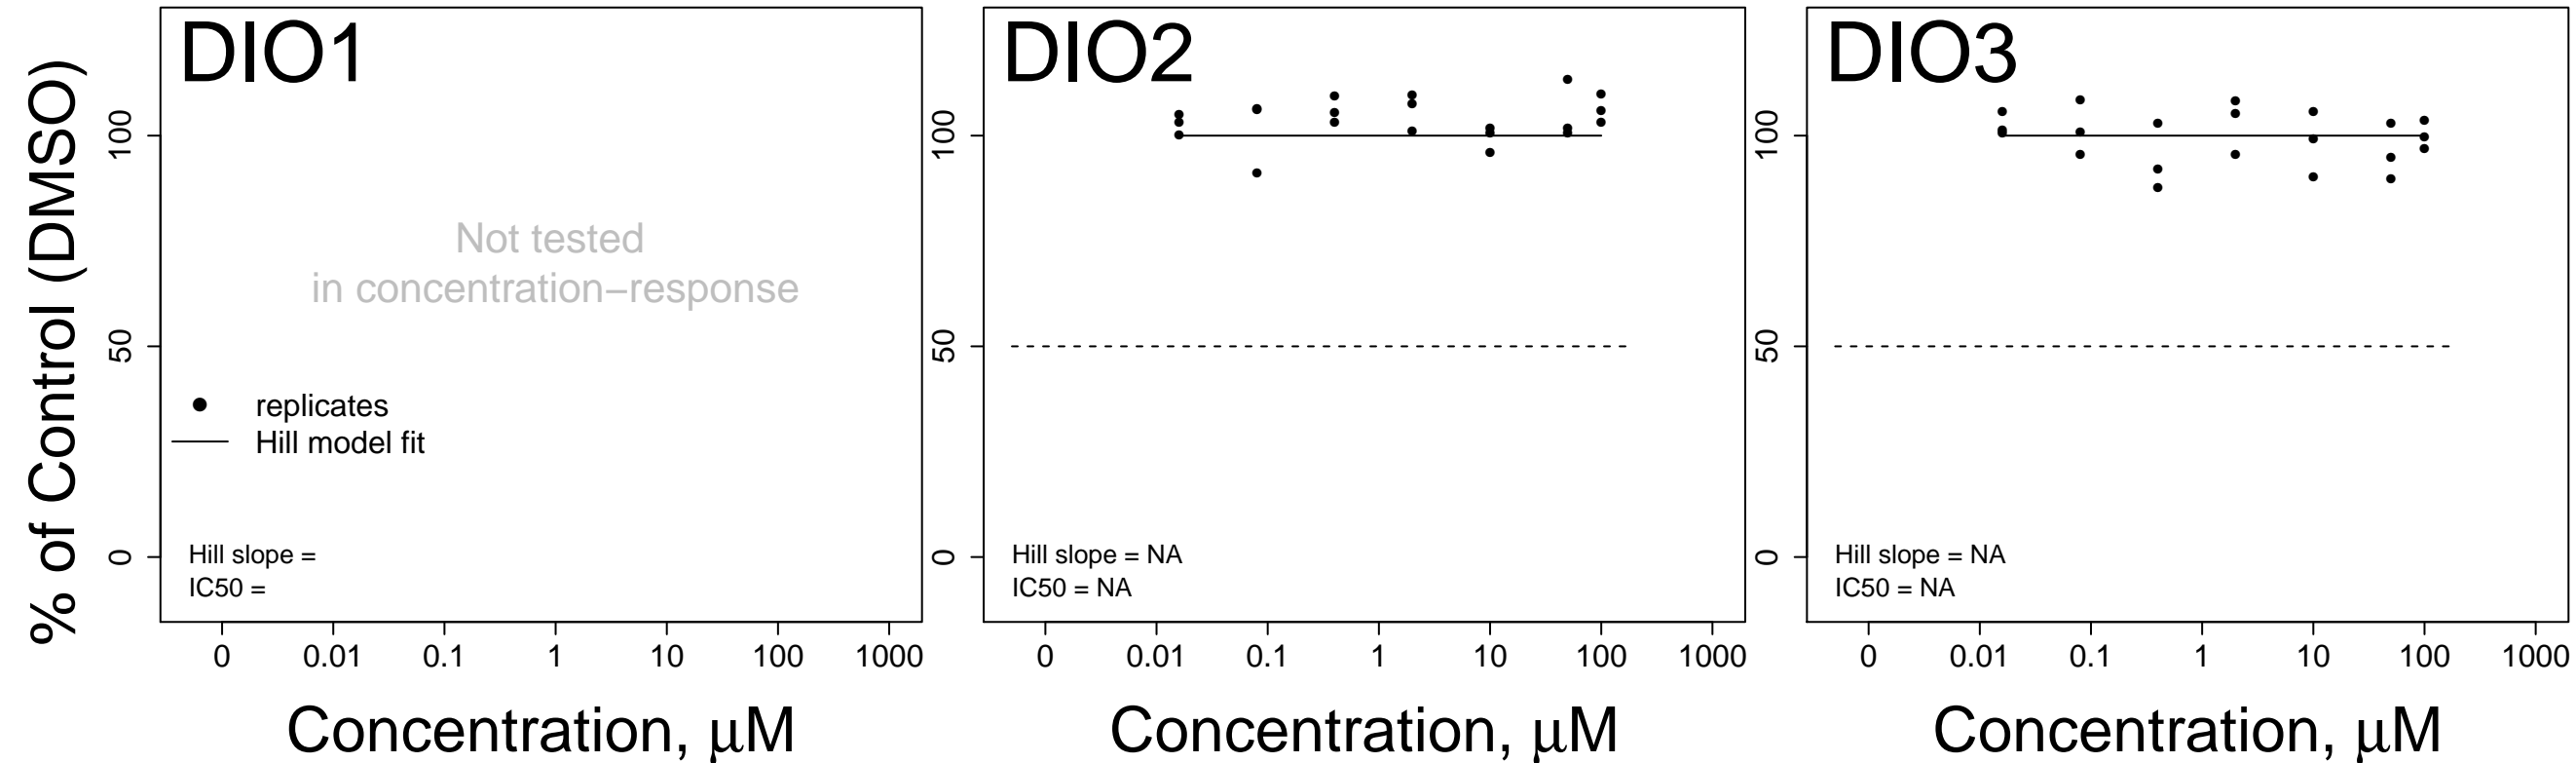





4,4'-Sulfonylbis[2-(prop-2-en-1-yl)phenol] CASRN: 41481-66-7

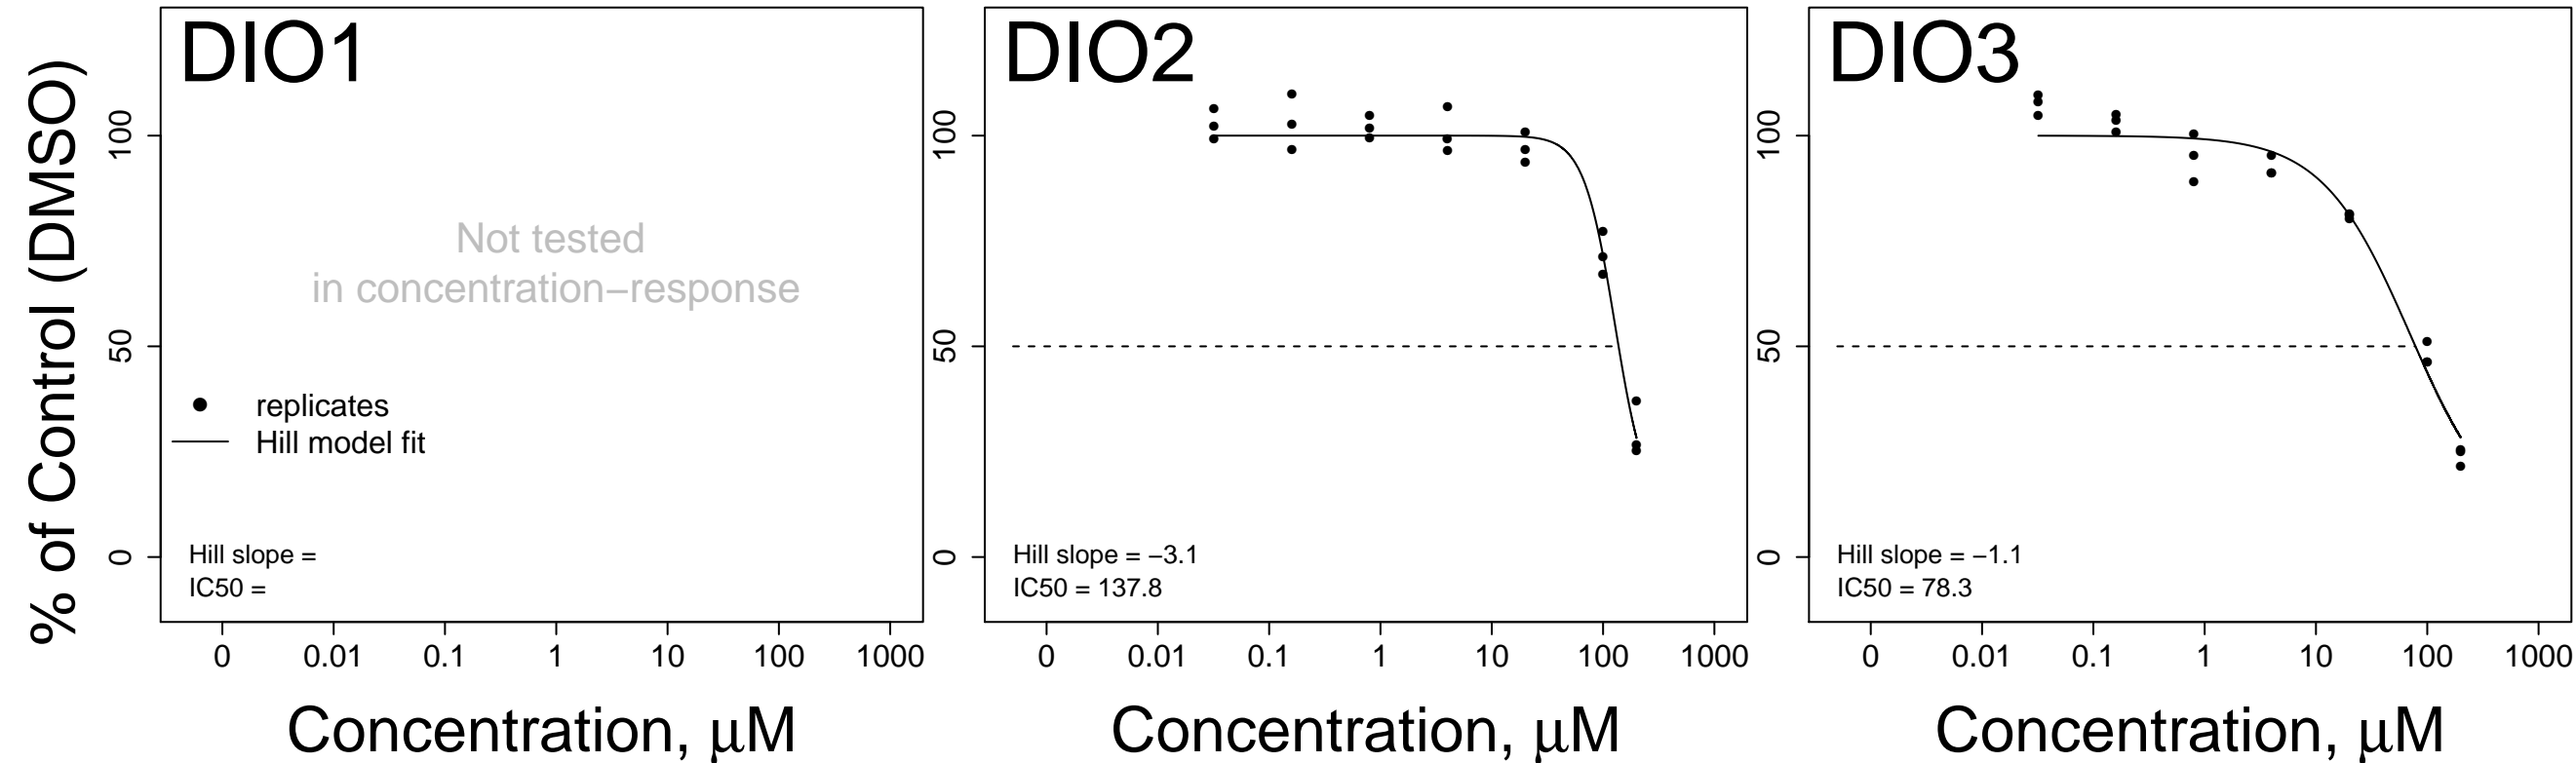

Cyproterone acetate CASRN: 427-51-0

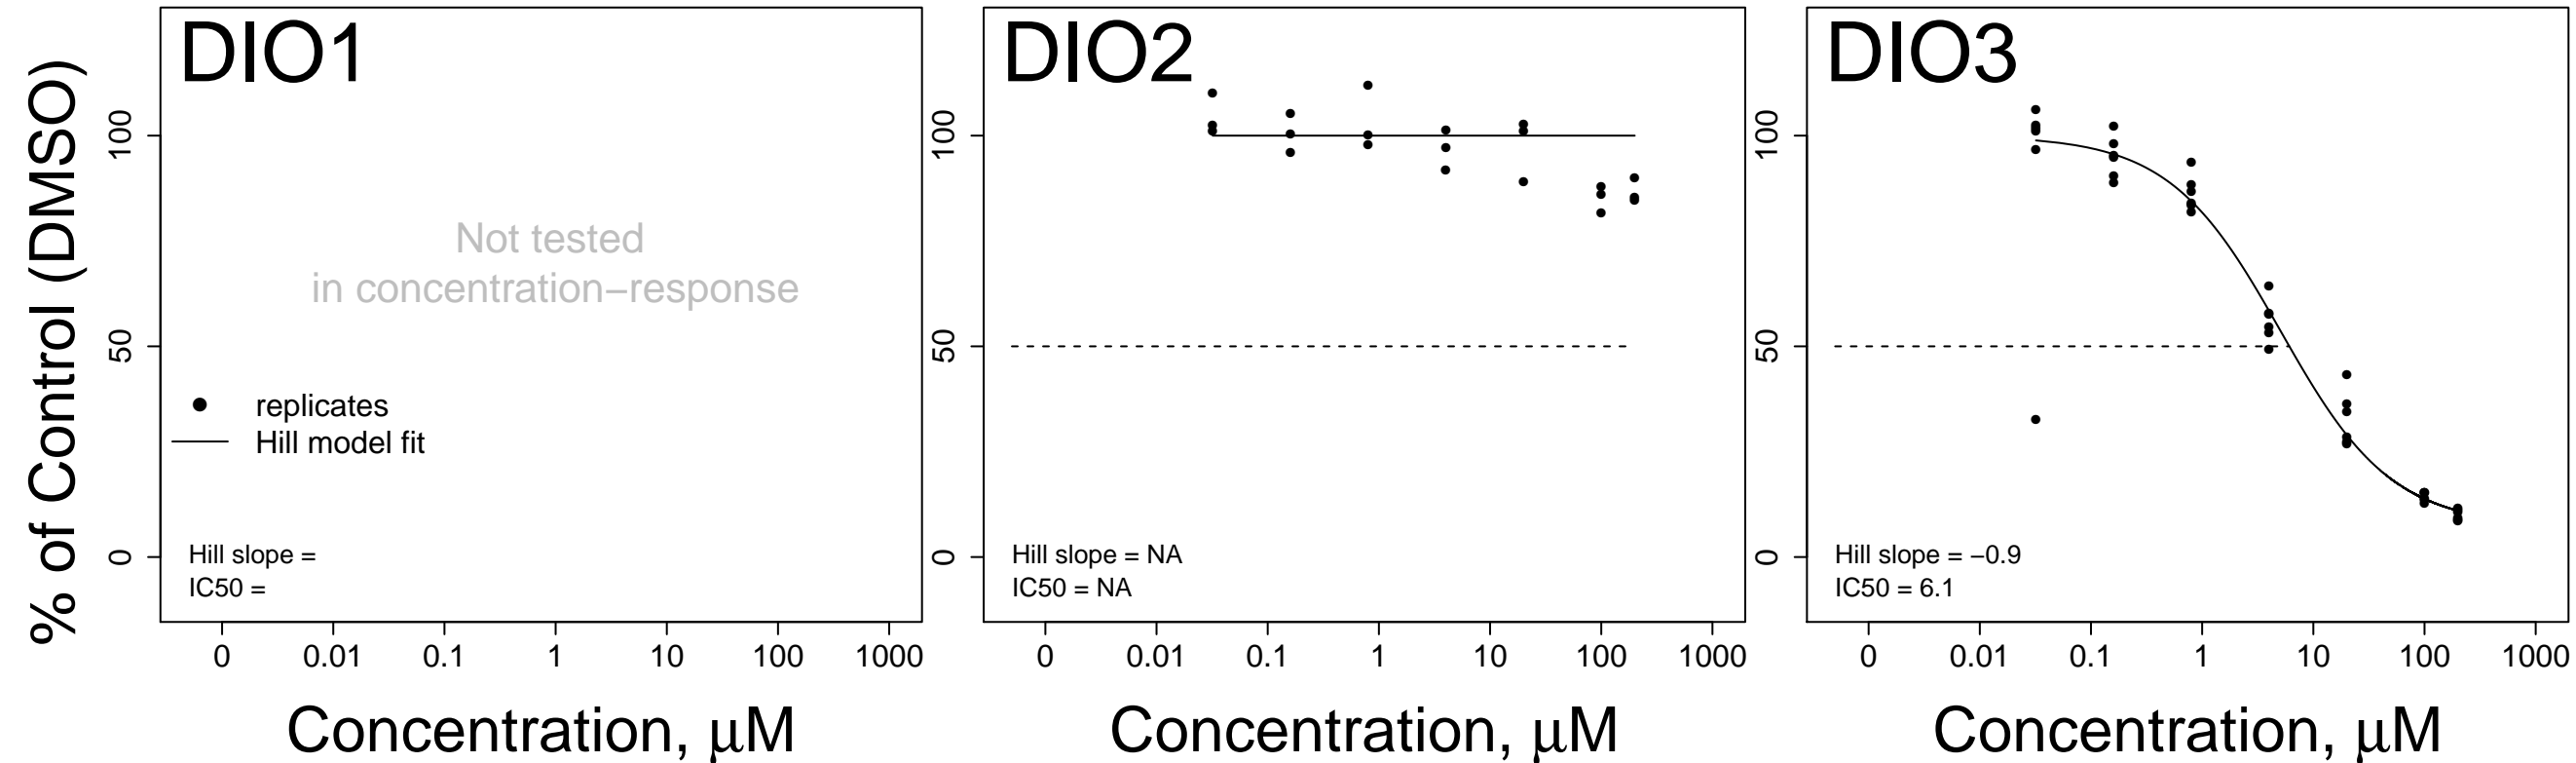

SAR 150640 CASRN: 433212-21-6

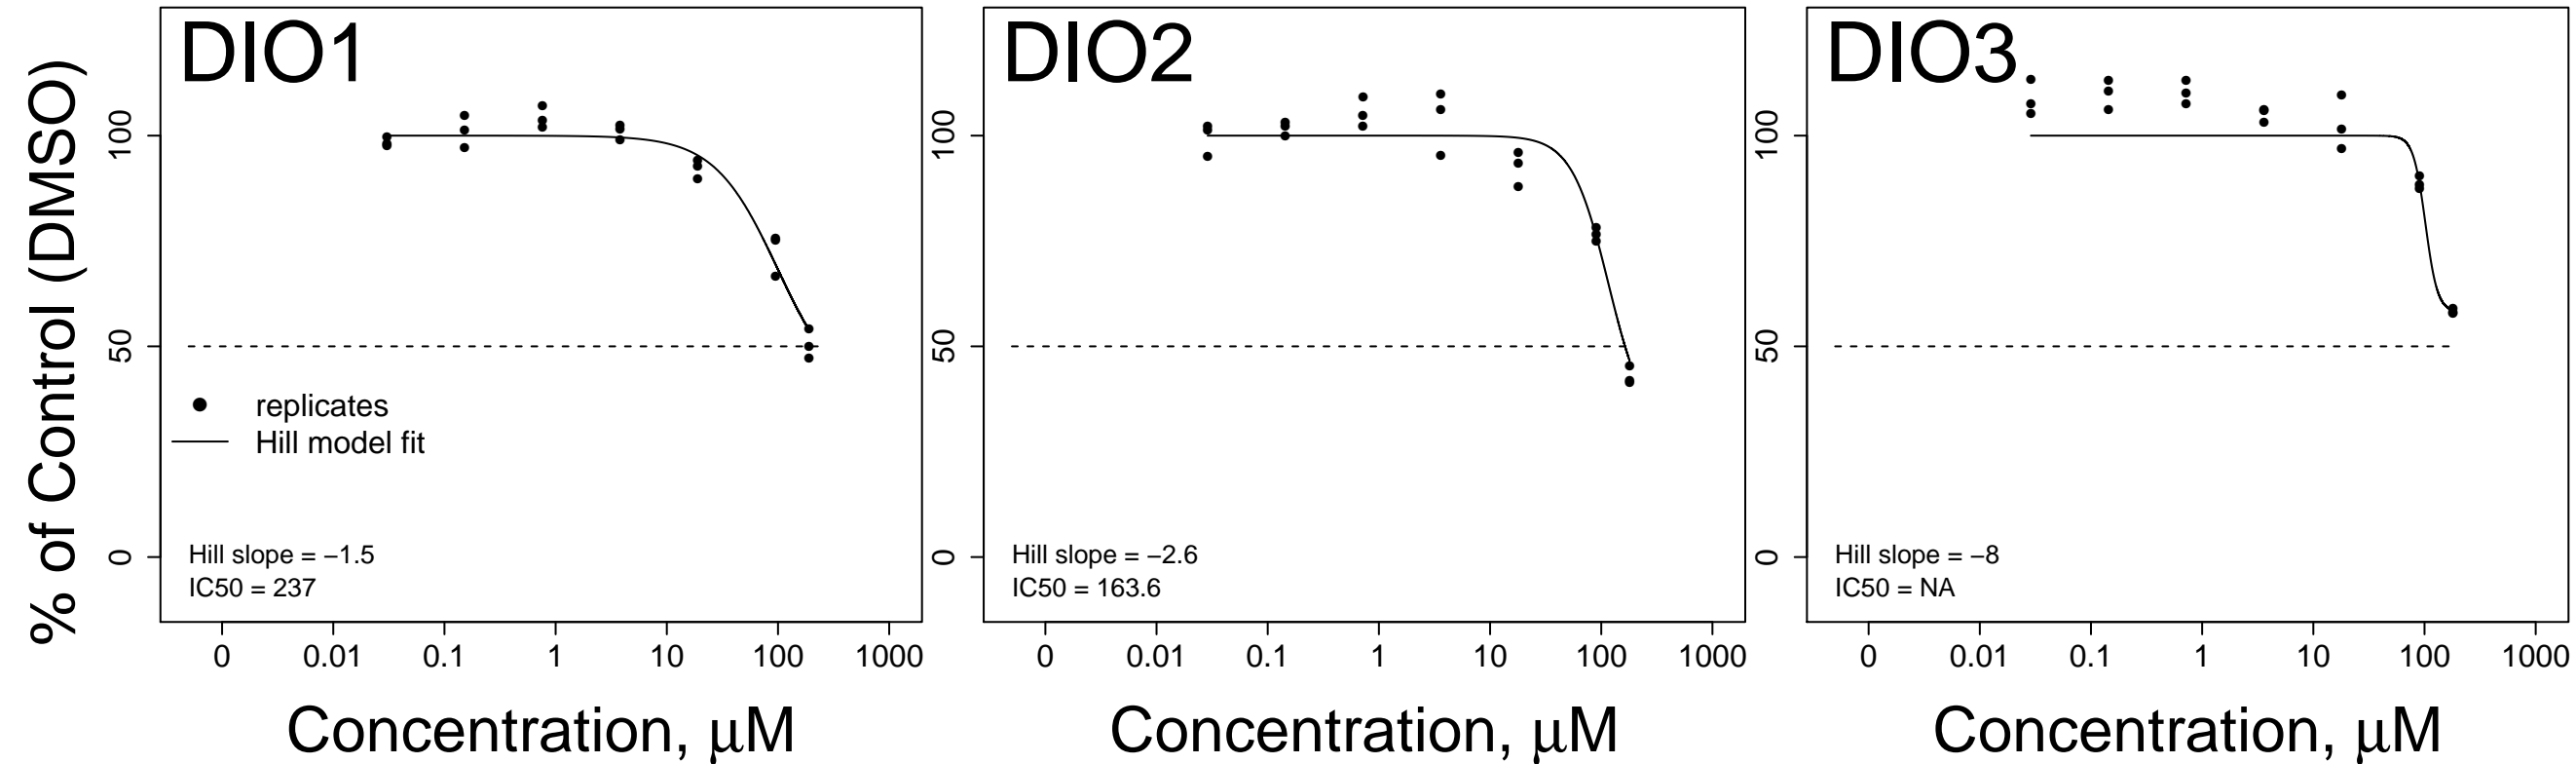

Genistein CASRN: 446-72-0

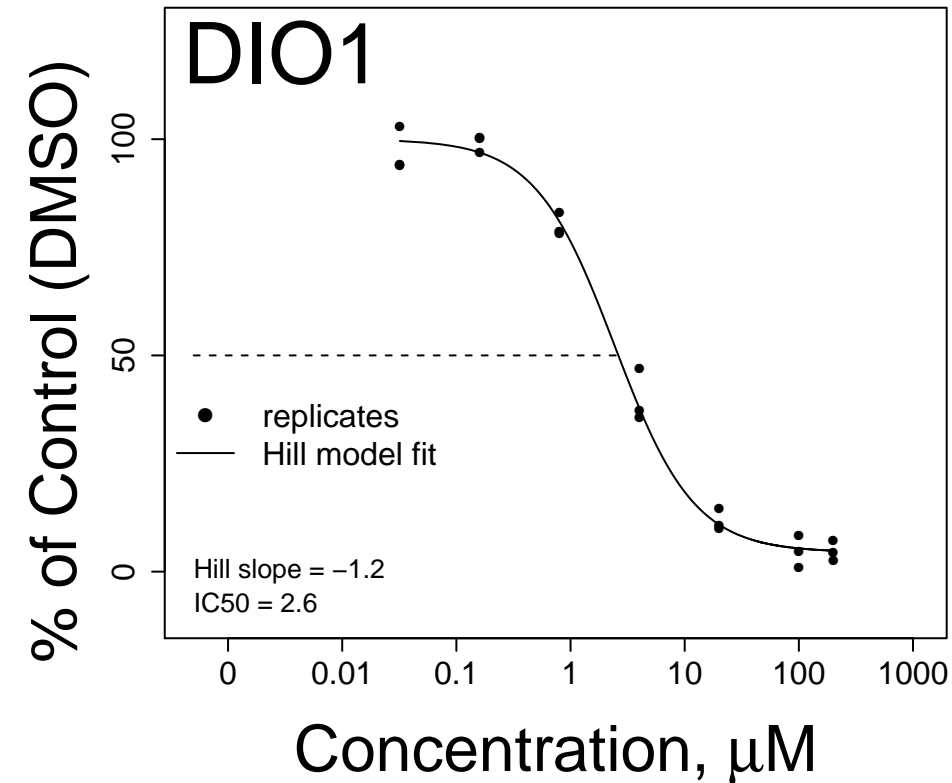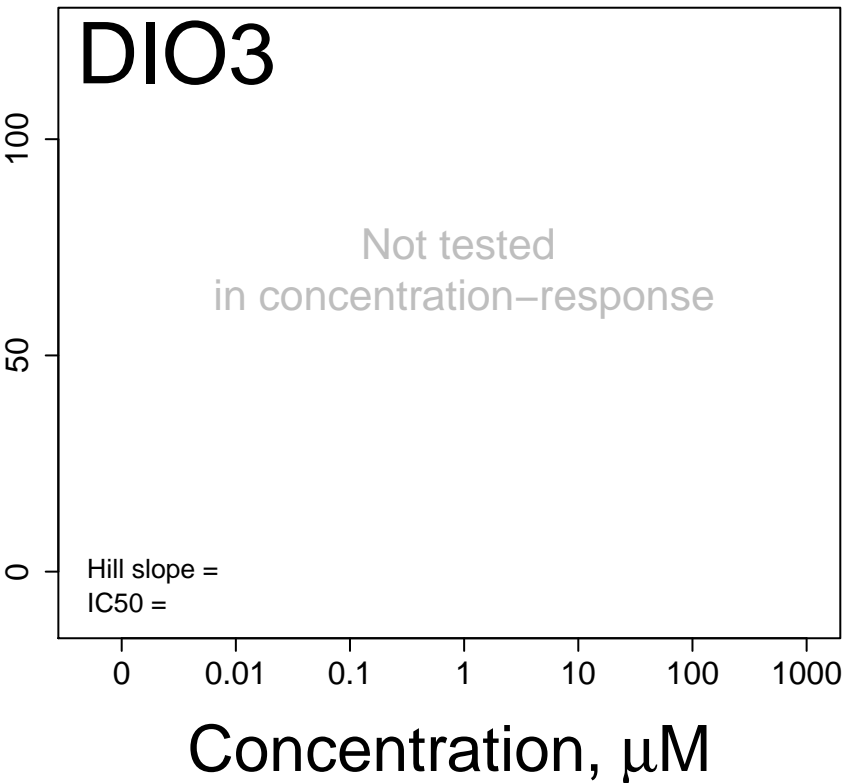

Daidzein CASRN: 486-66-8

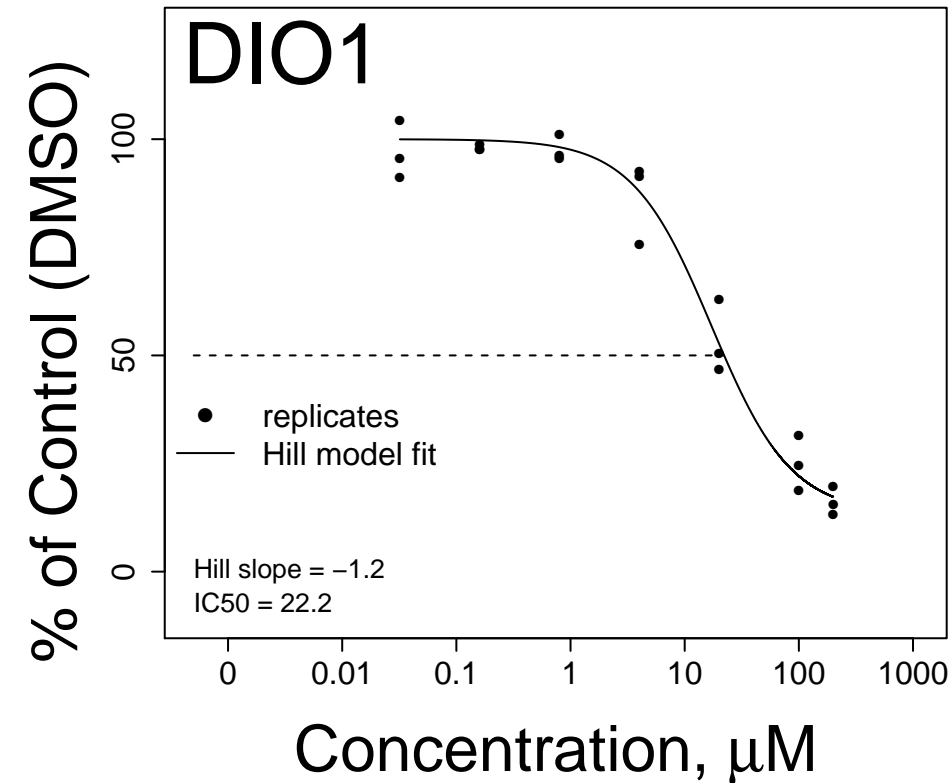

# Clomiphene citrate (1:1) CASRN: 50-41-9

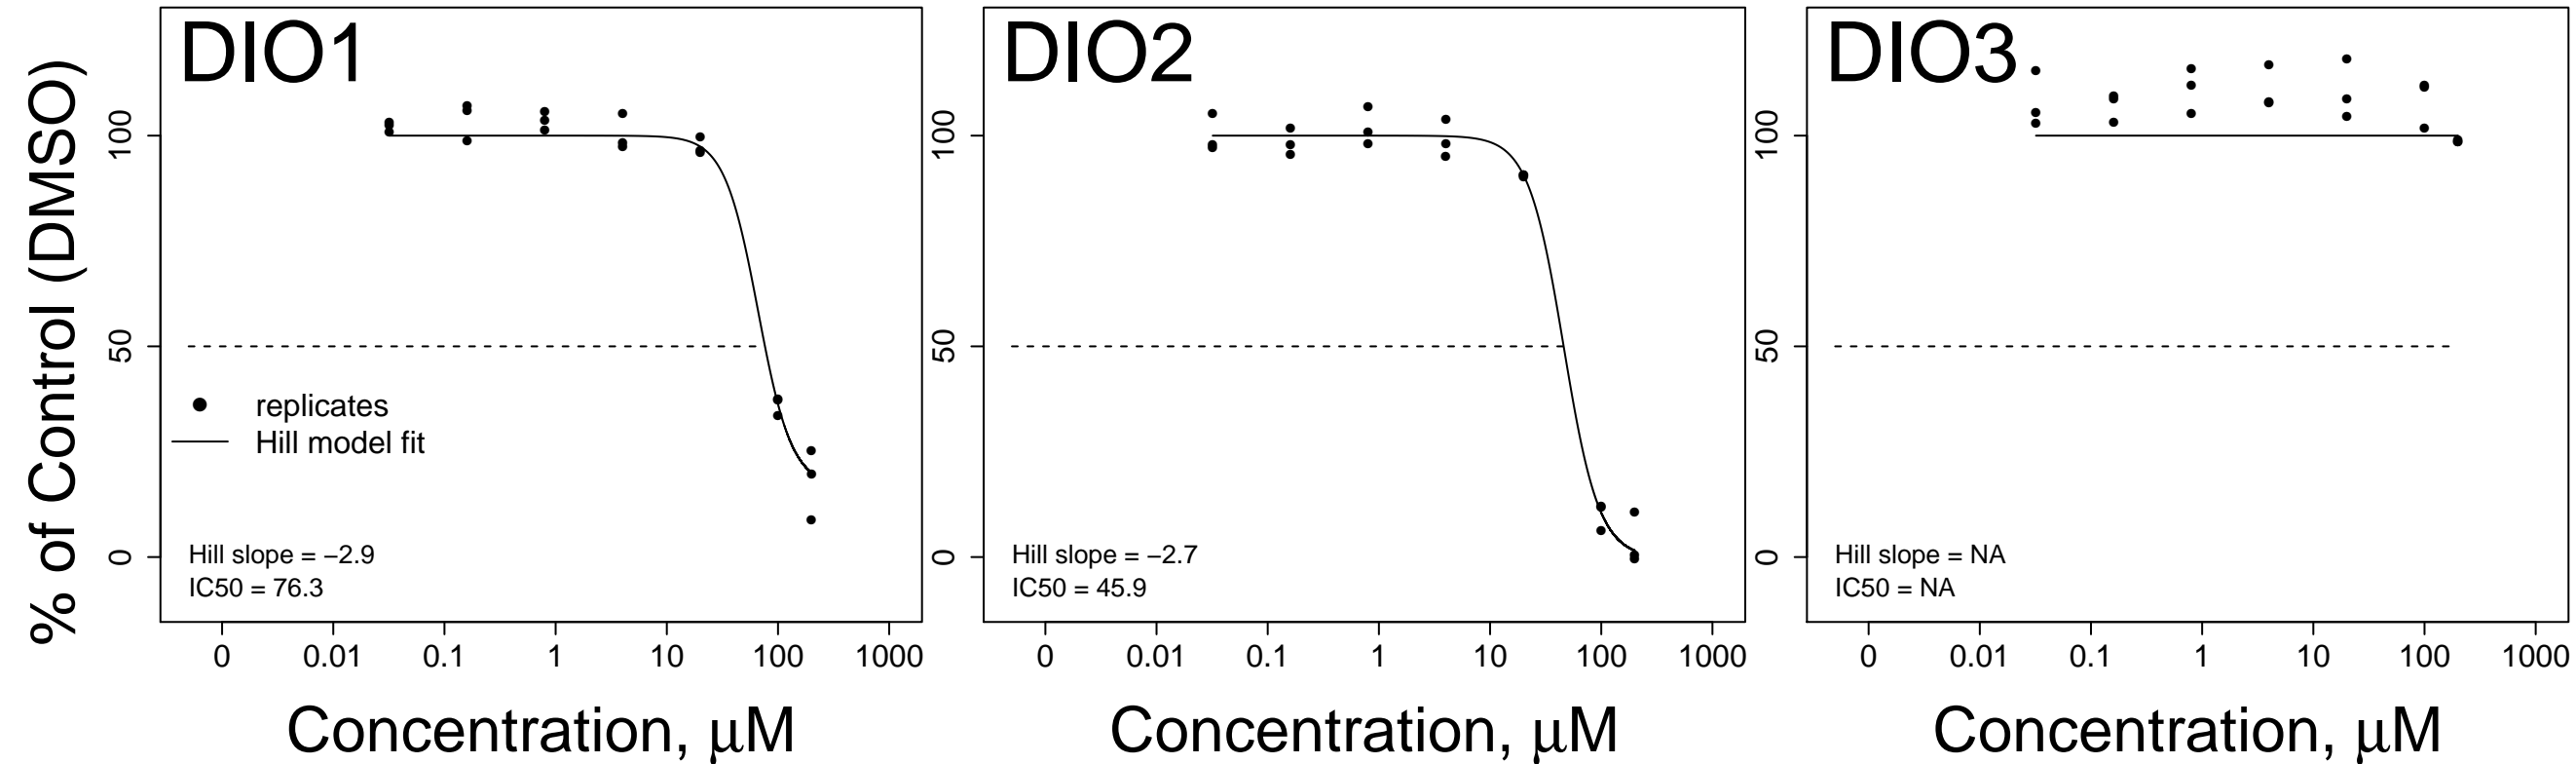

6-Propyl-2-thiouracil CASRN: 51-52-5

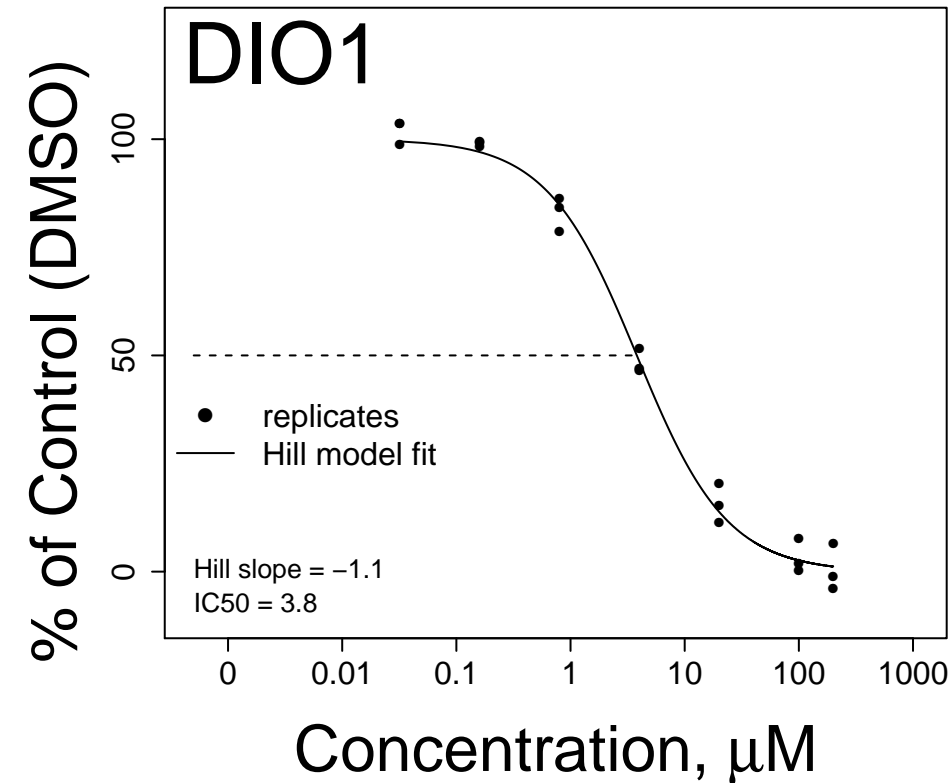



# Spironolactone CASRN: 52-01-7

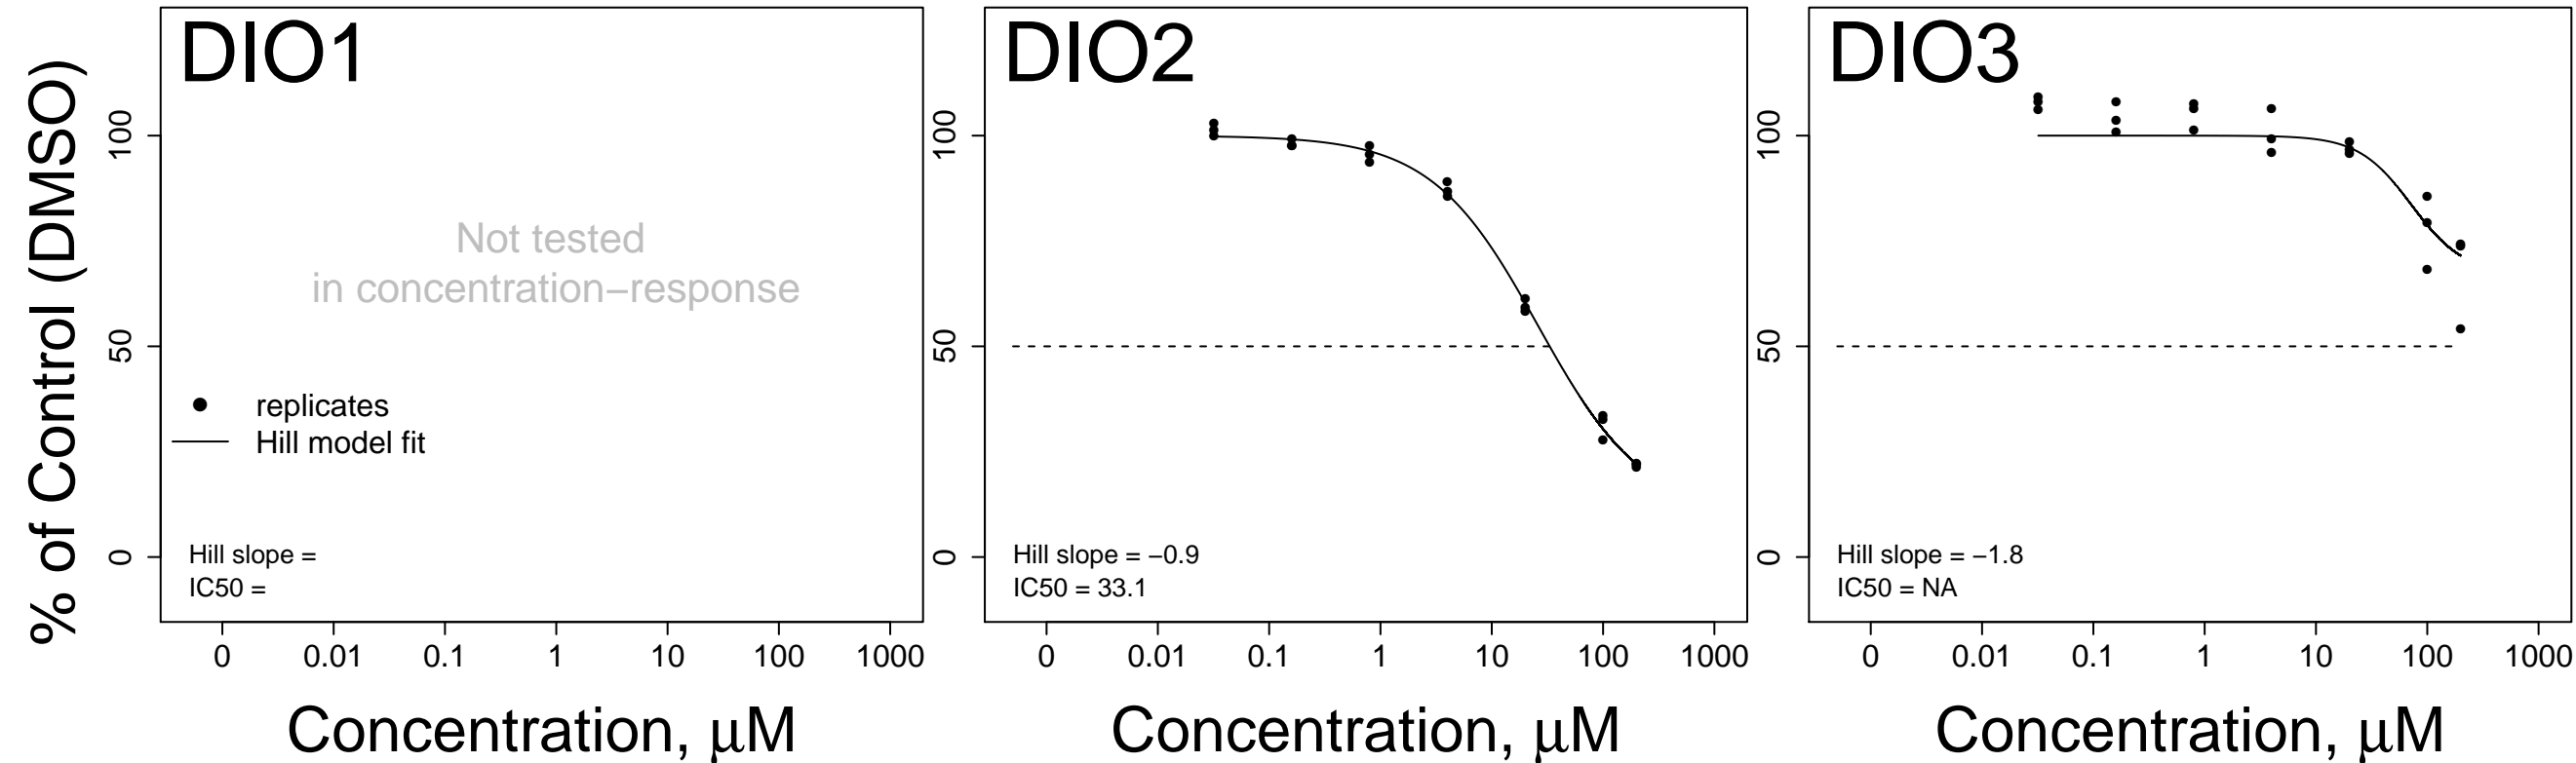

# 4-Chlorobenzotrichloride CASRN: 5216-25-1

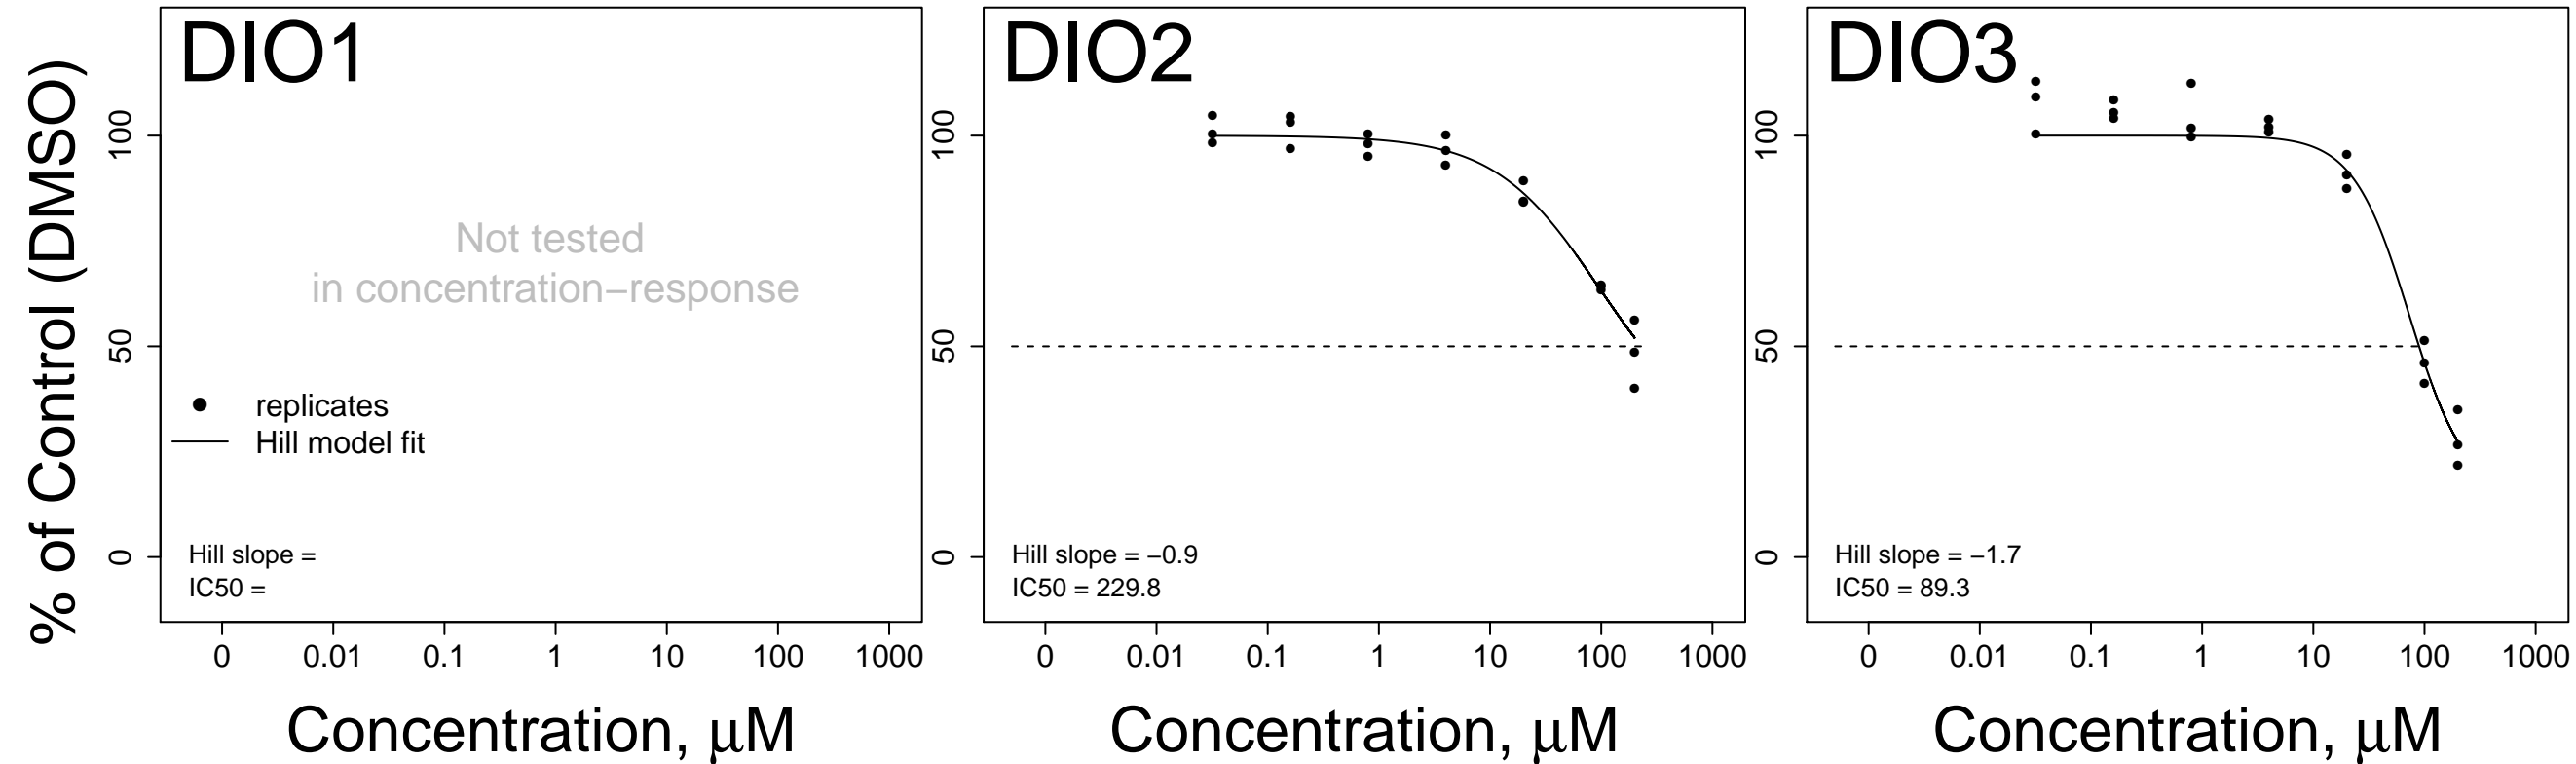

1,2-Dinitrobenzene CASRN: 528-29-0

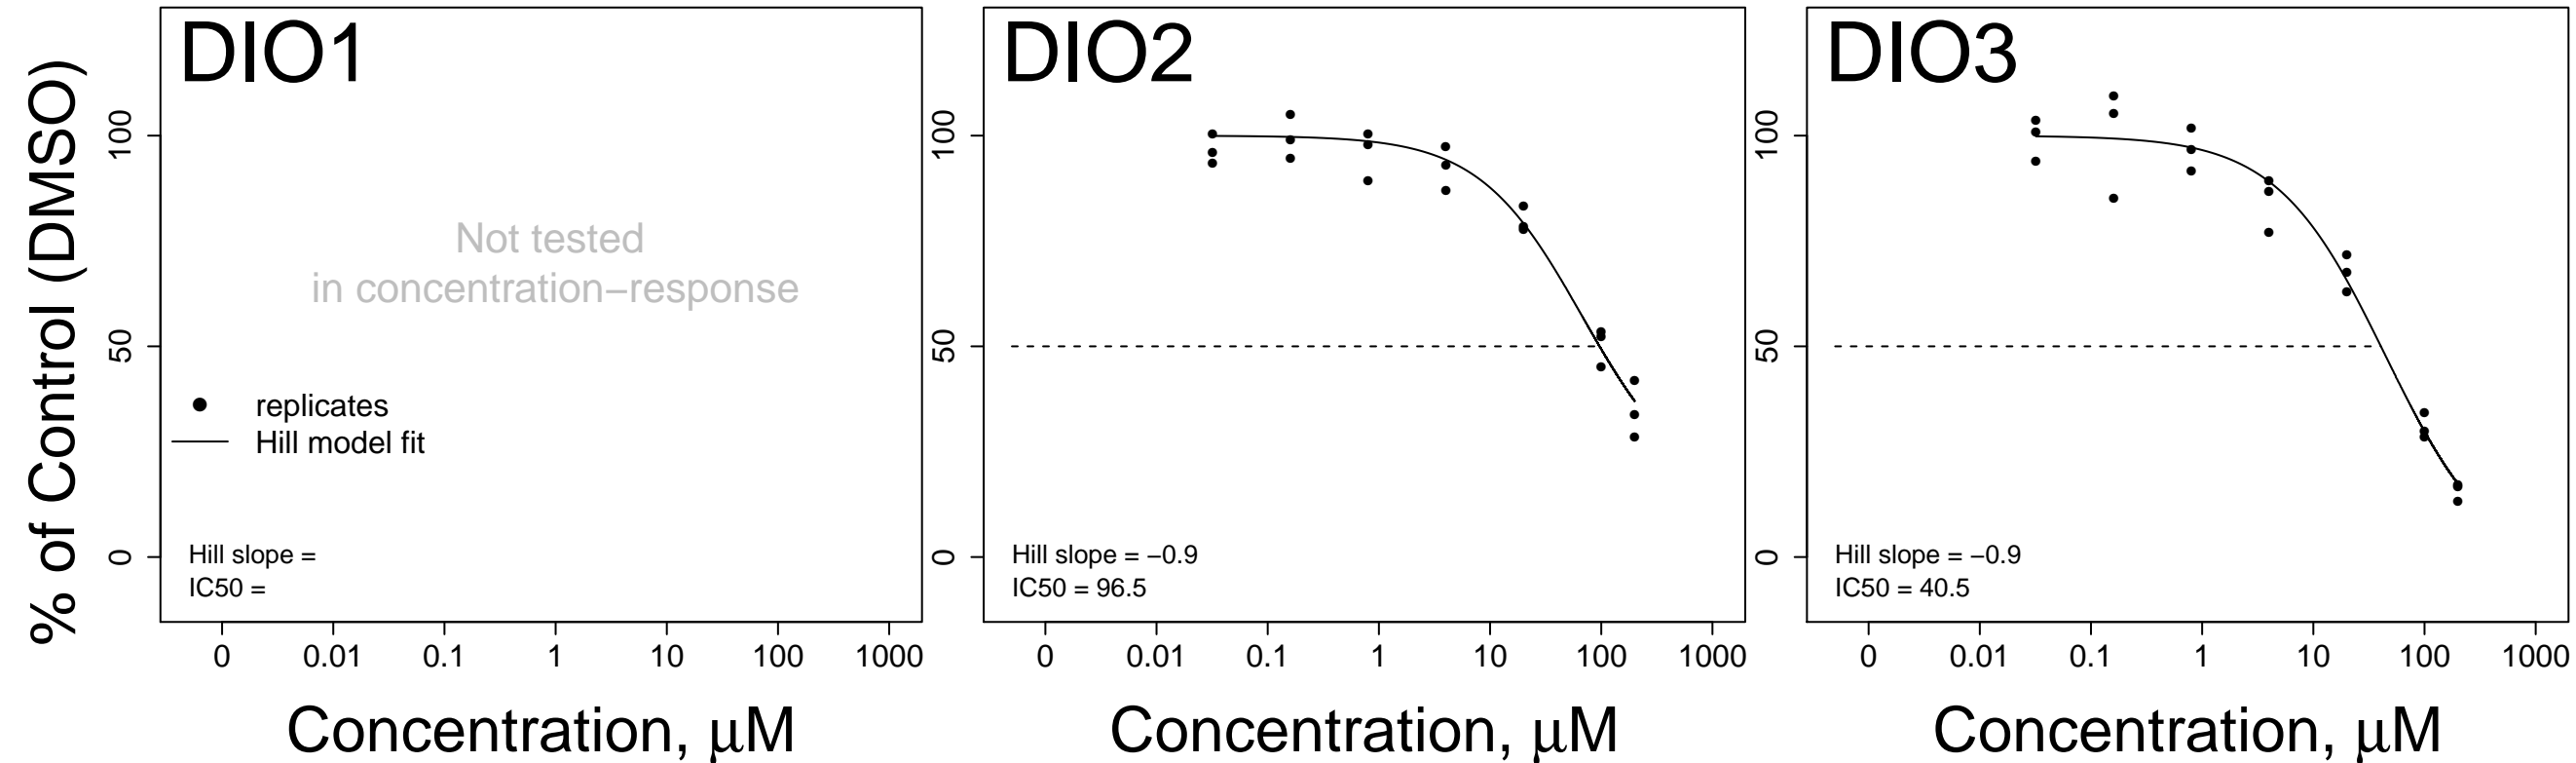

1-Hydroxypyrene CASRN: 5315-79-7

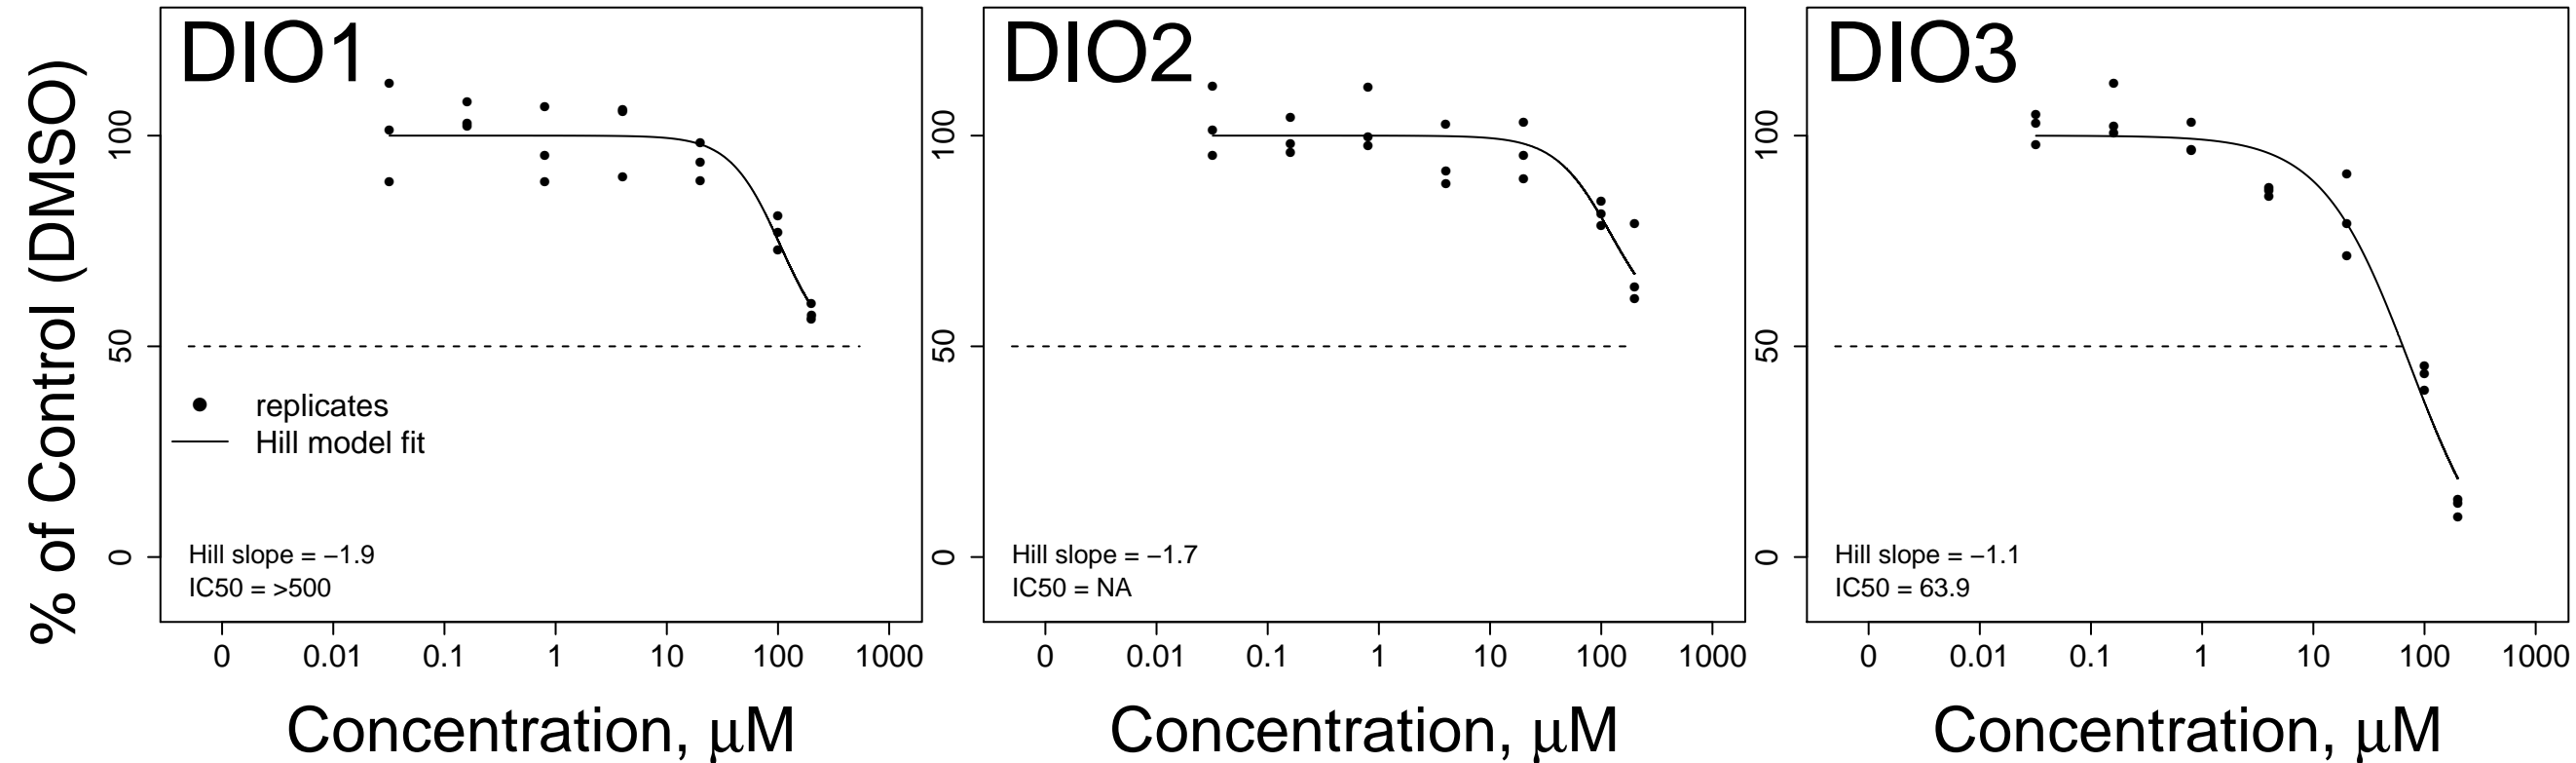

3,7-Dimethyl-2,6-octadienal CASRN: 5392-40-5

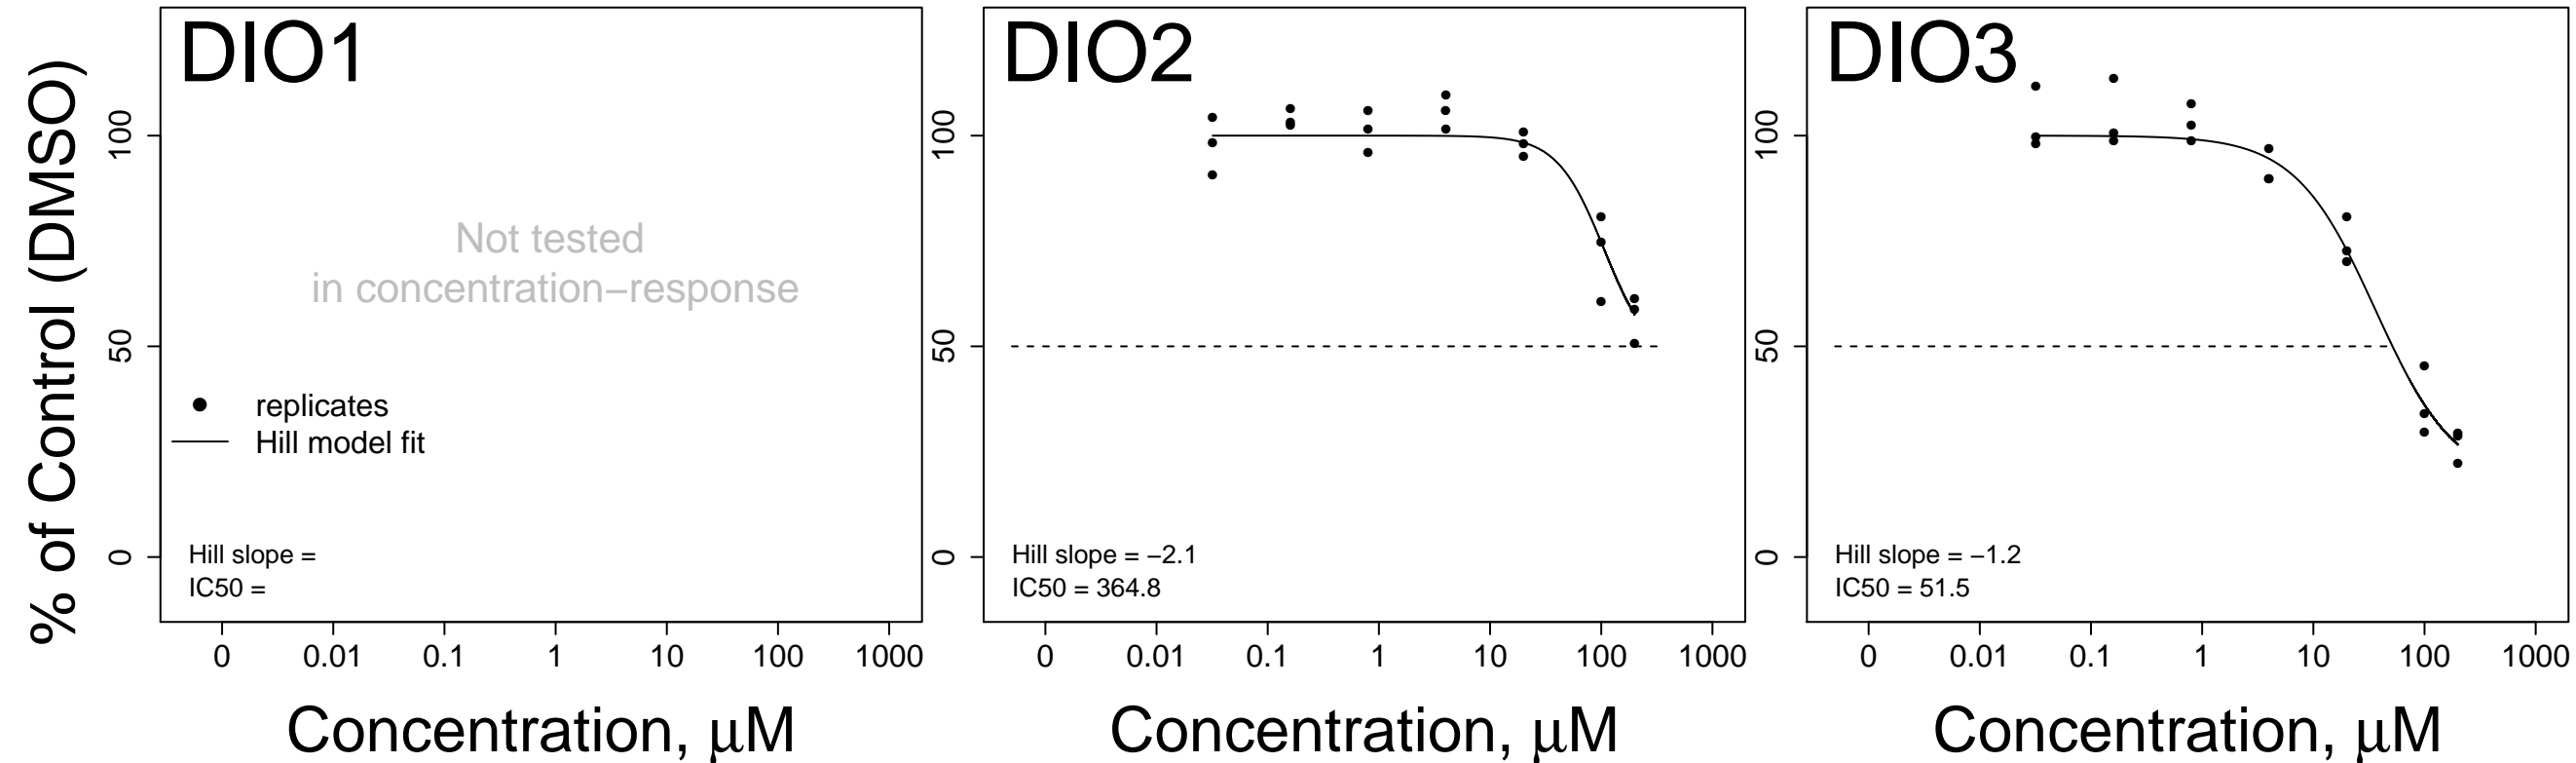

# Gentian Violet CASRN: 548-62-9

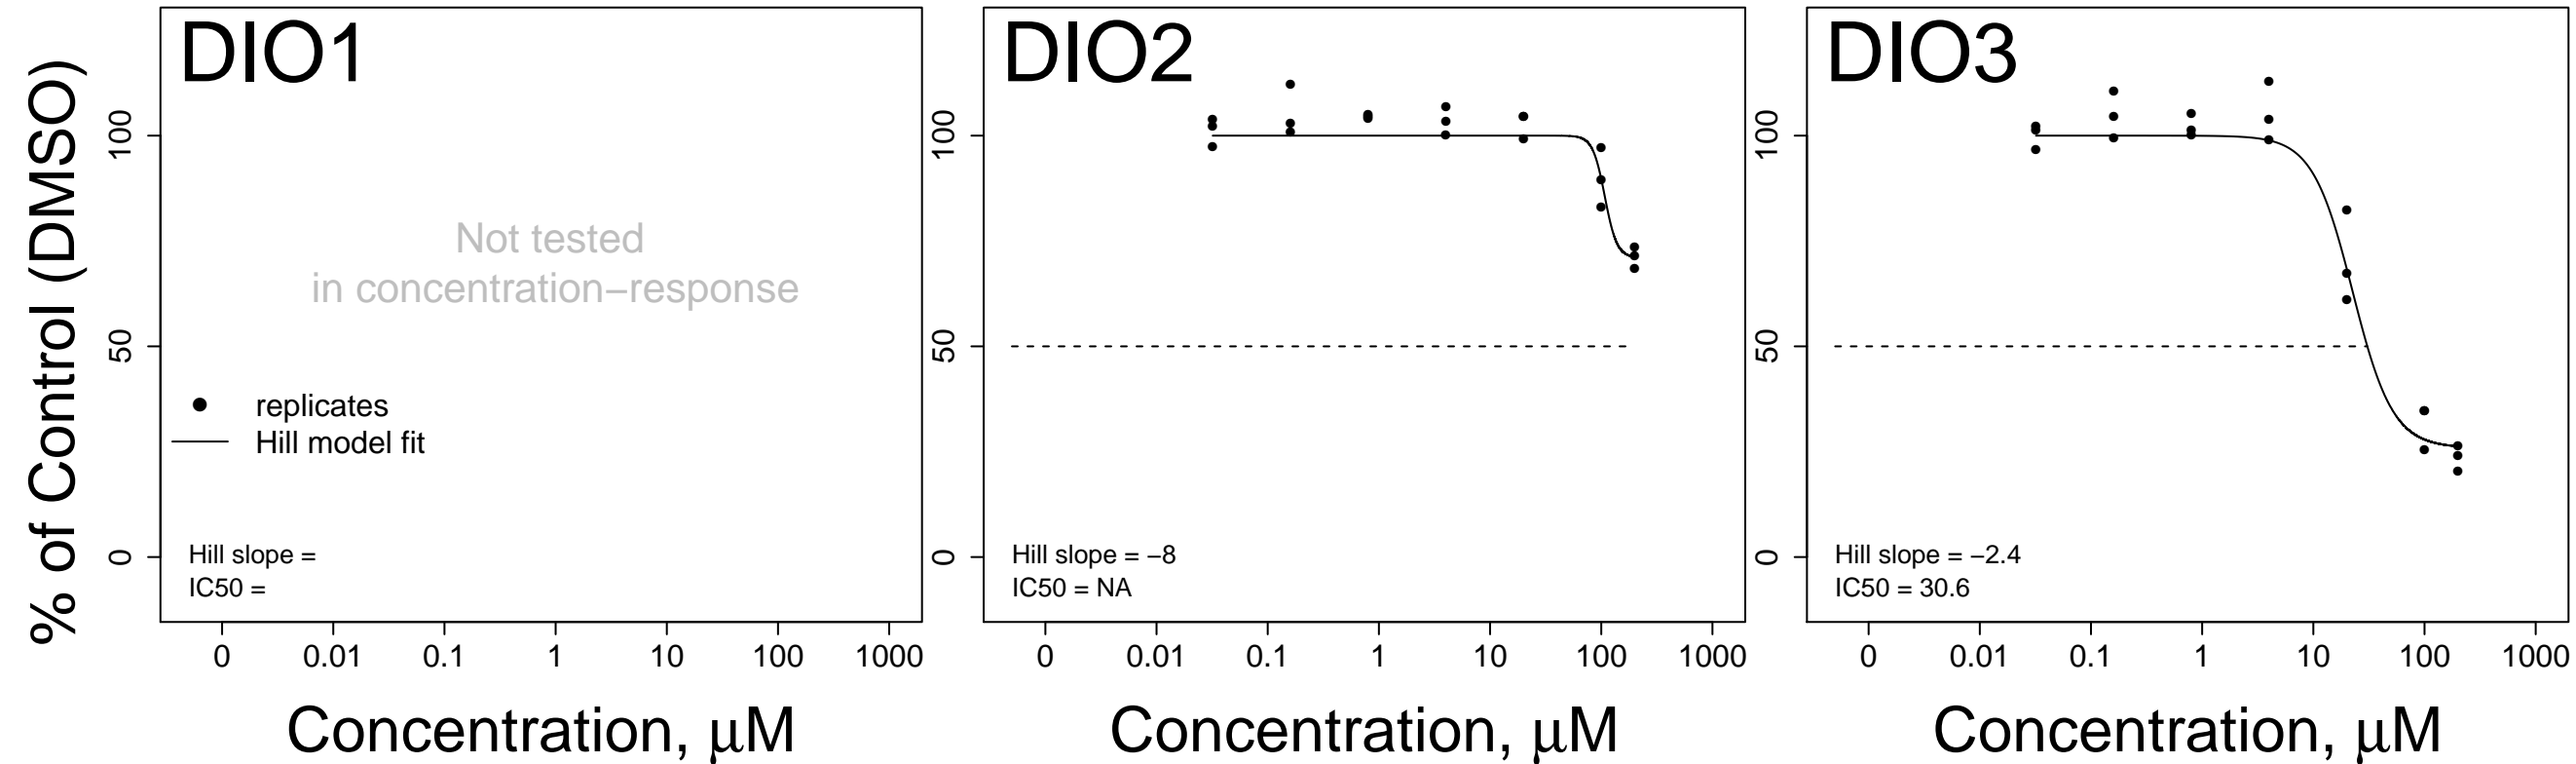

Tamoxifen citrate CASRN: 54965-24-1

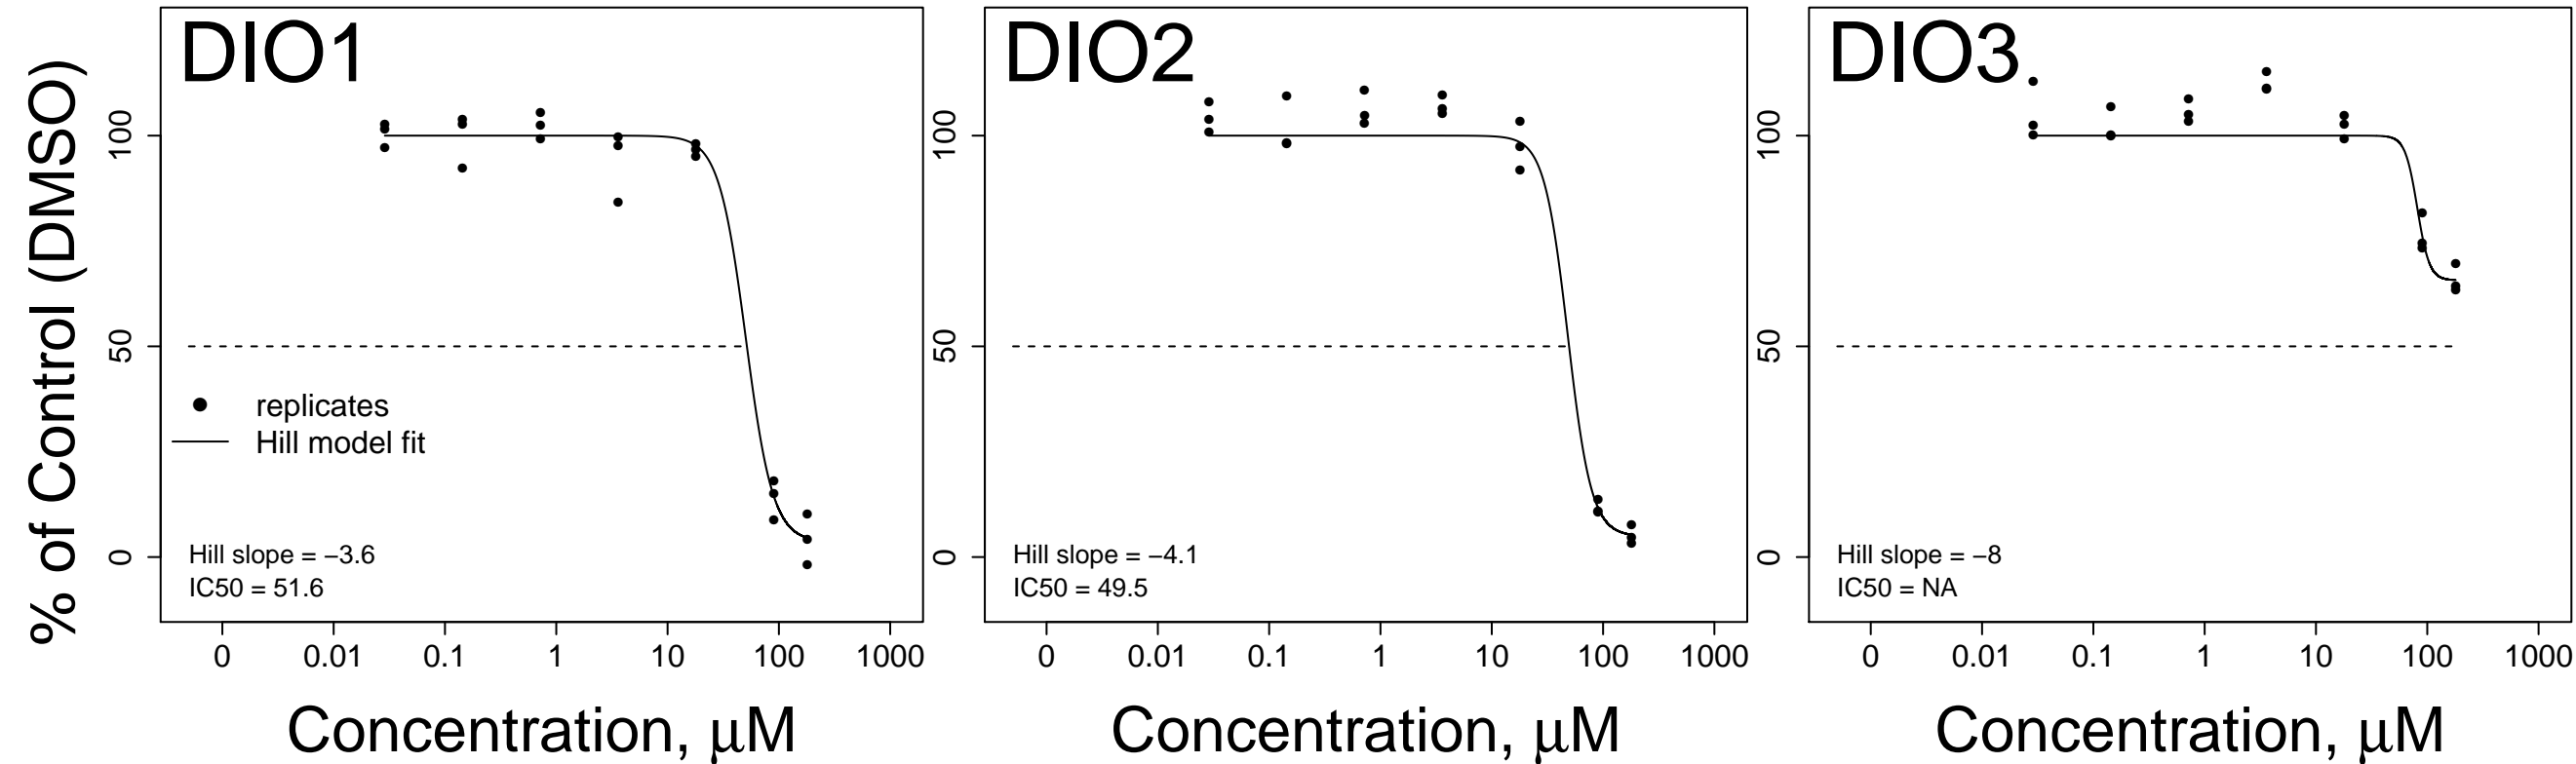

6-Methyl-2-thiouracil CASRN: 56-04-2

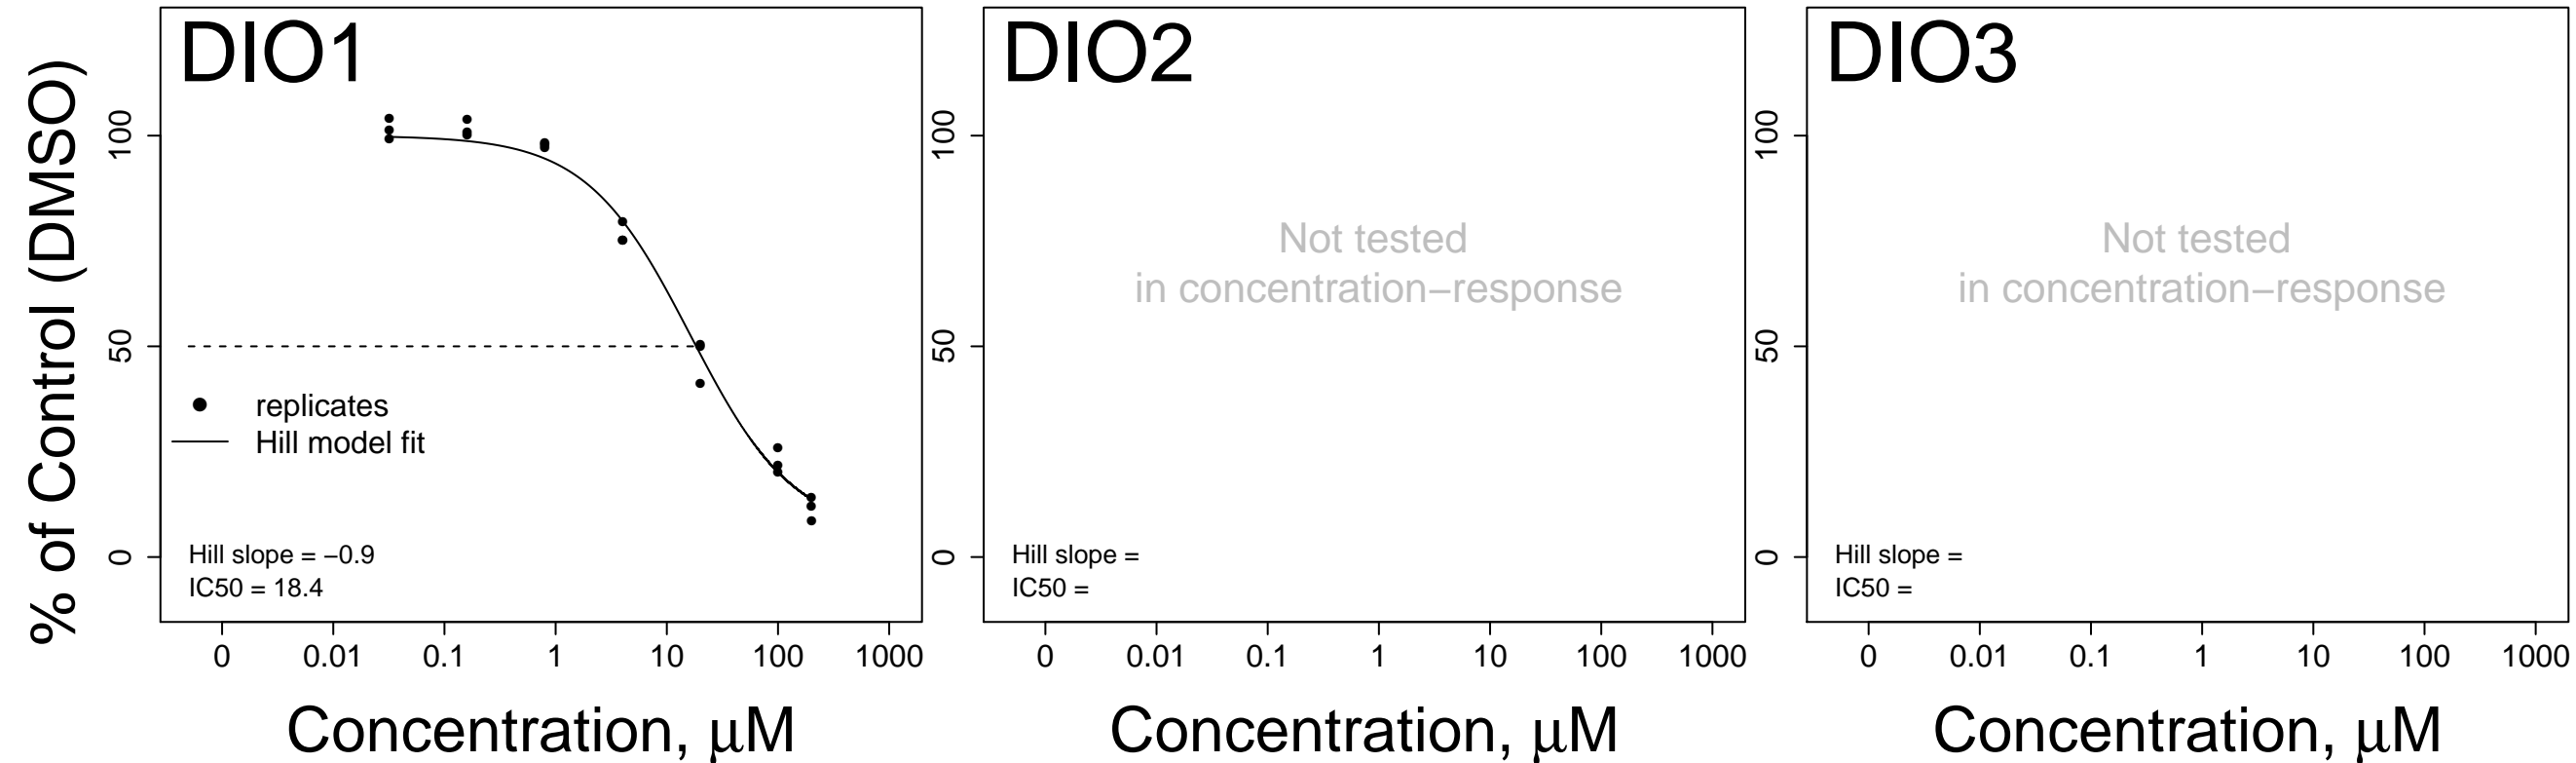



Benz(a)anthracene CASRN: 56-55-3

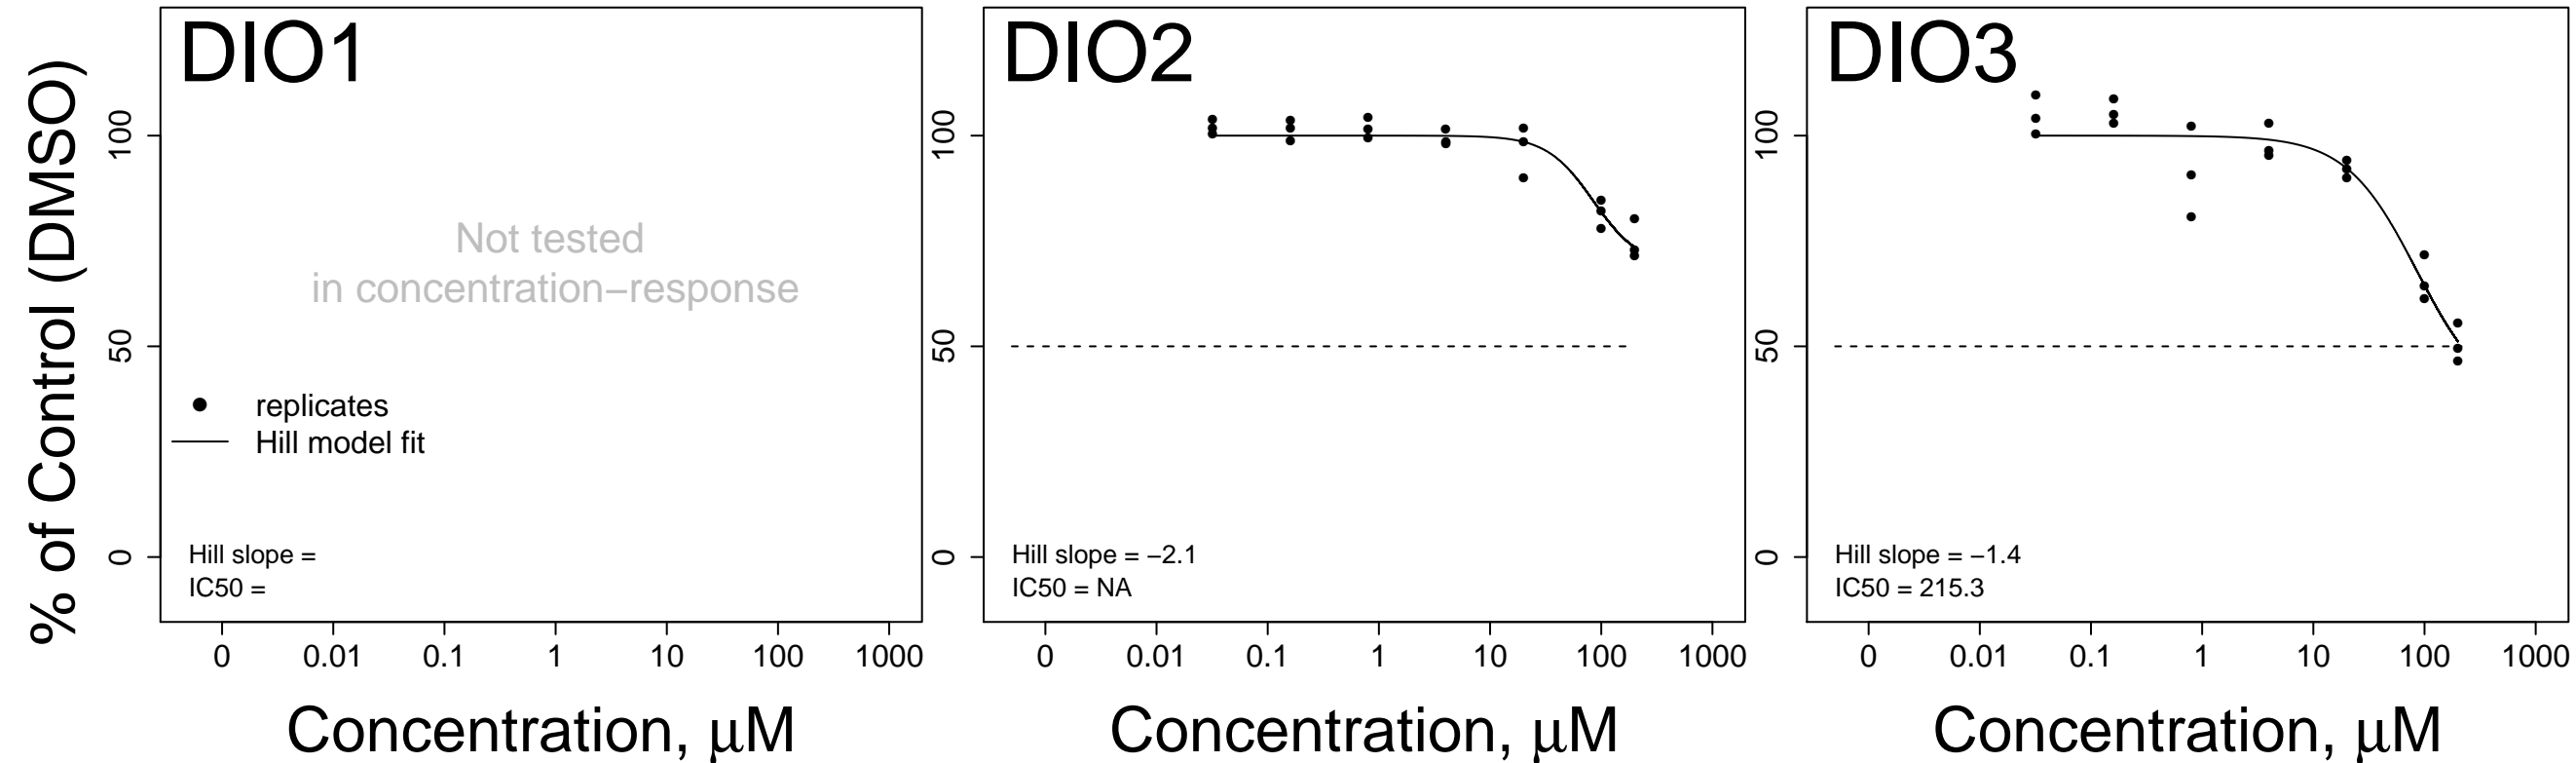

Docusate sodium CASRN: 577-11-7

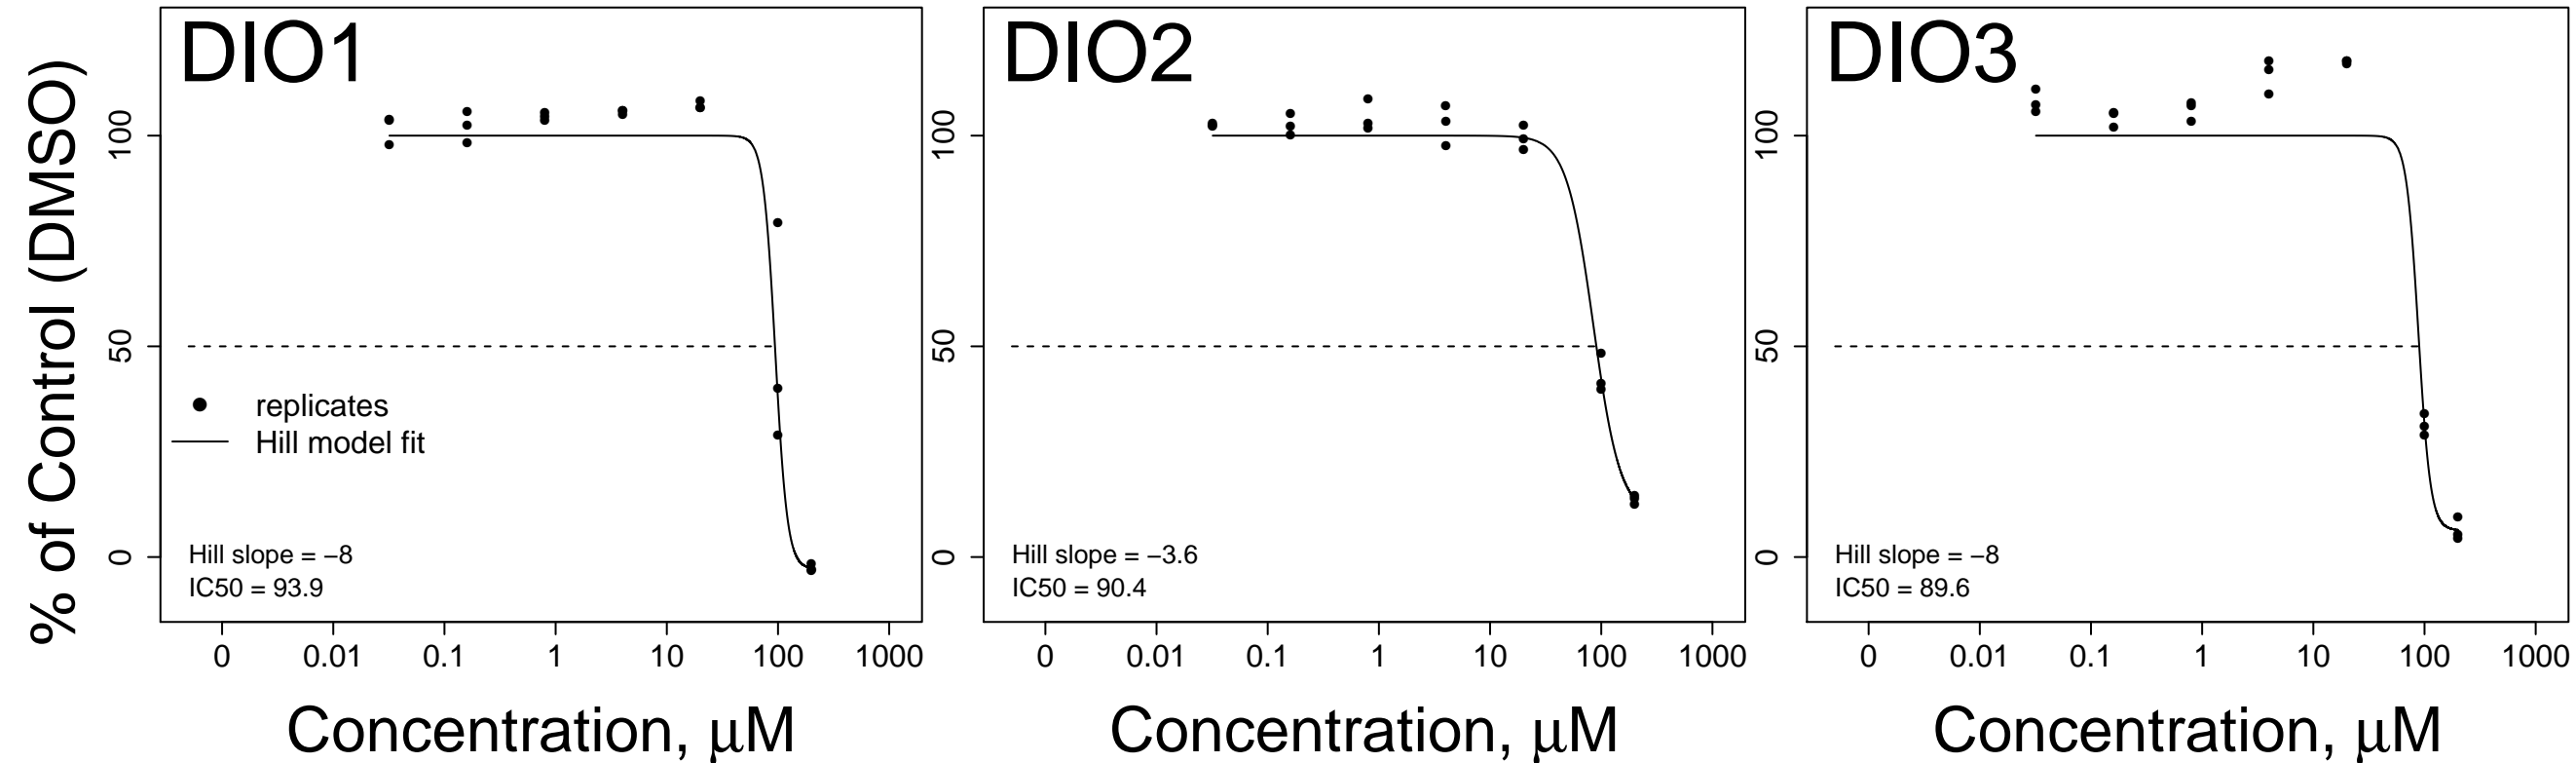

Terbutylazine CASRN: 5915-41-3

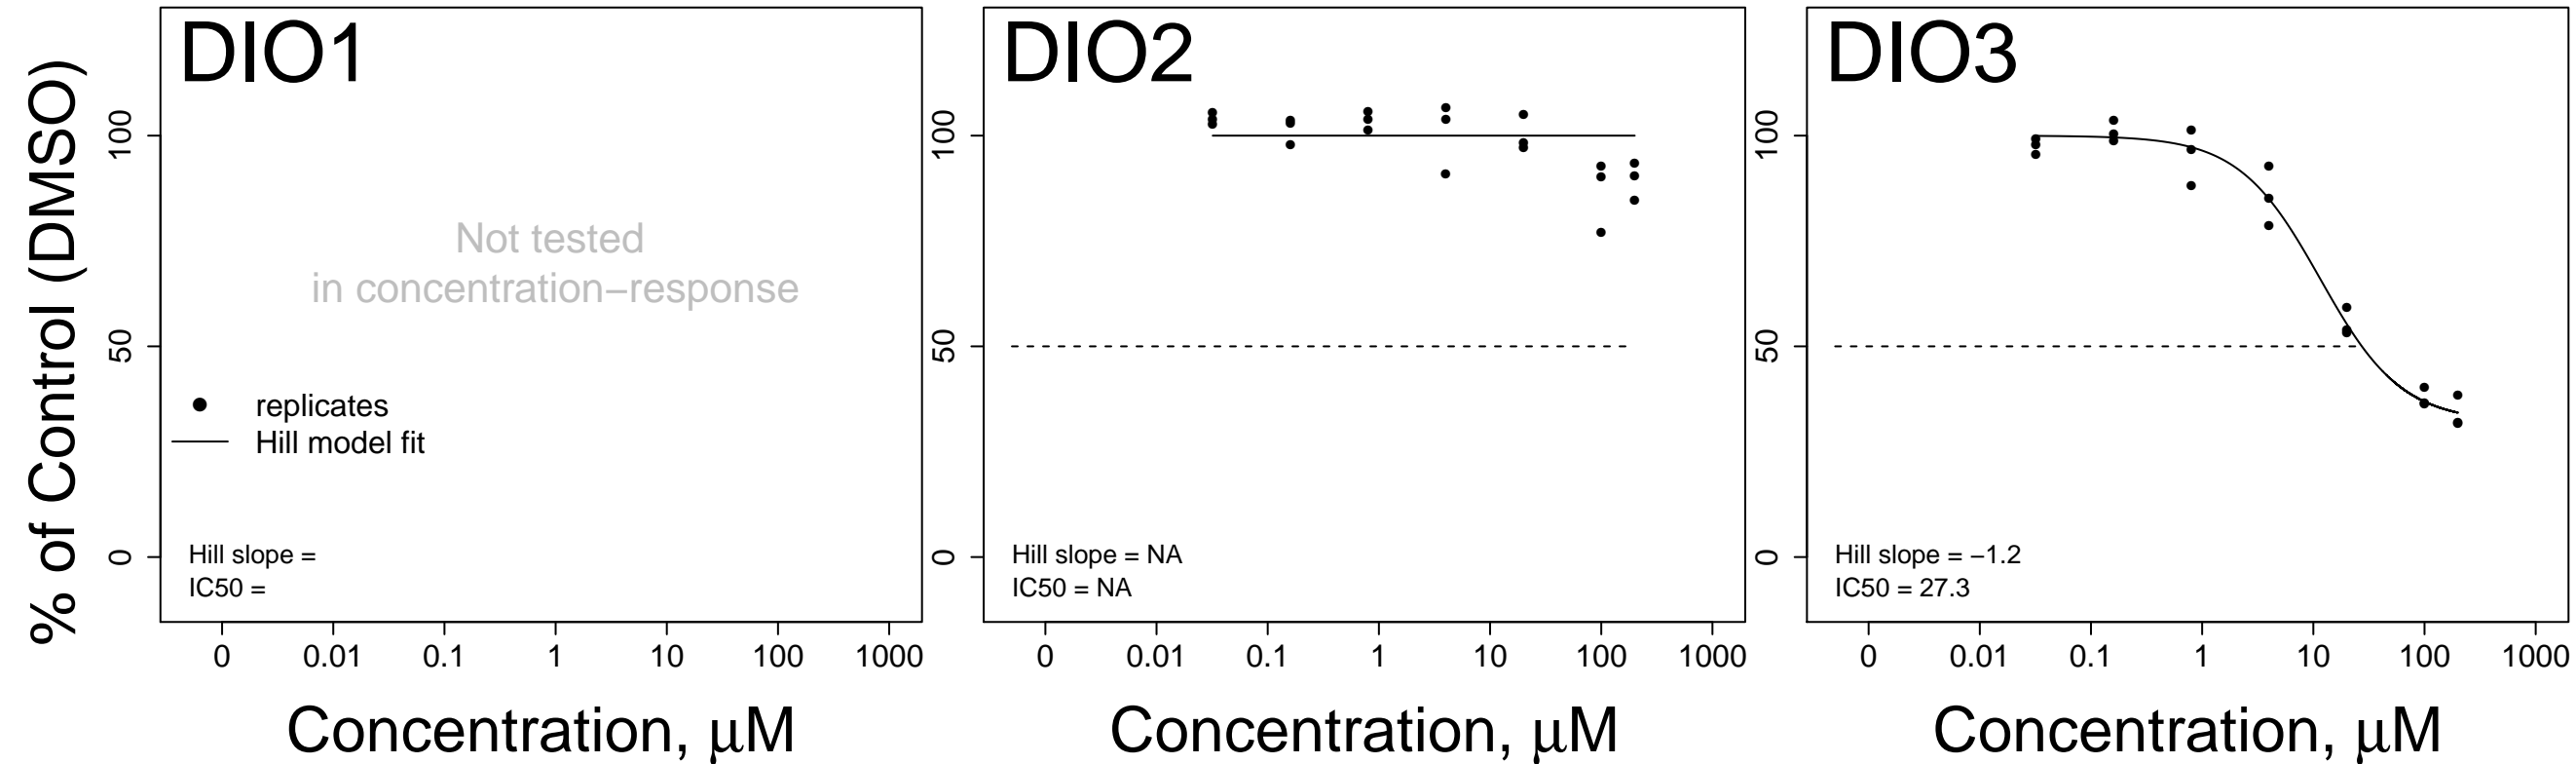

# Sulfasalazine CASRN: 599-79-1

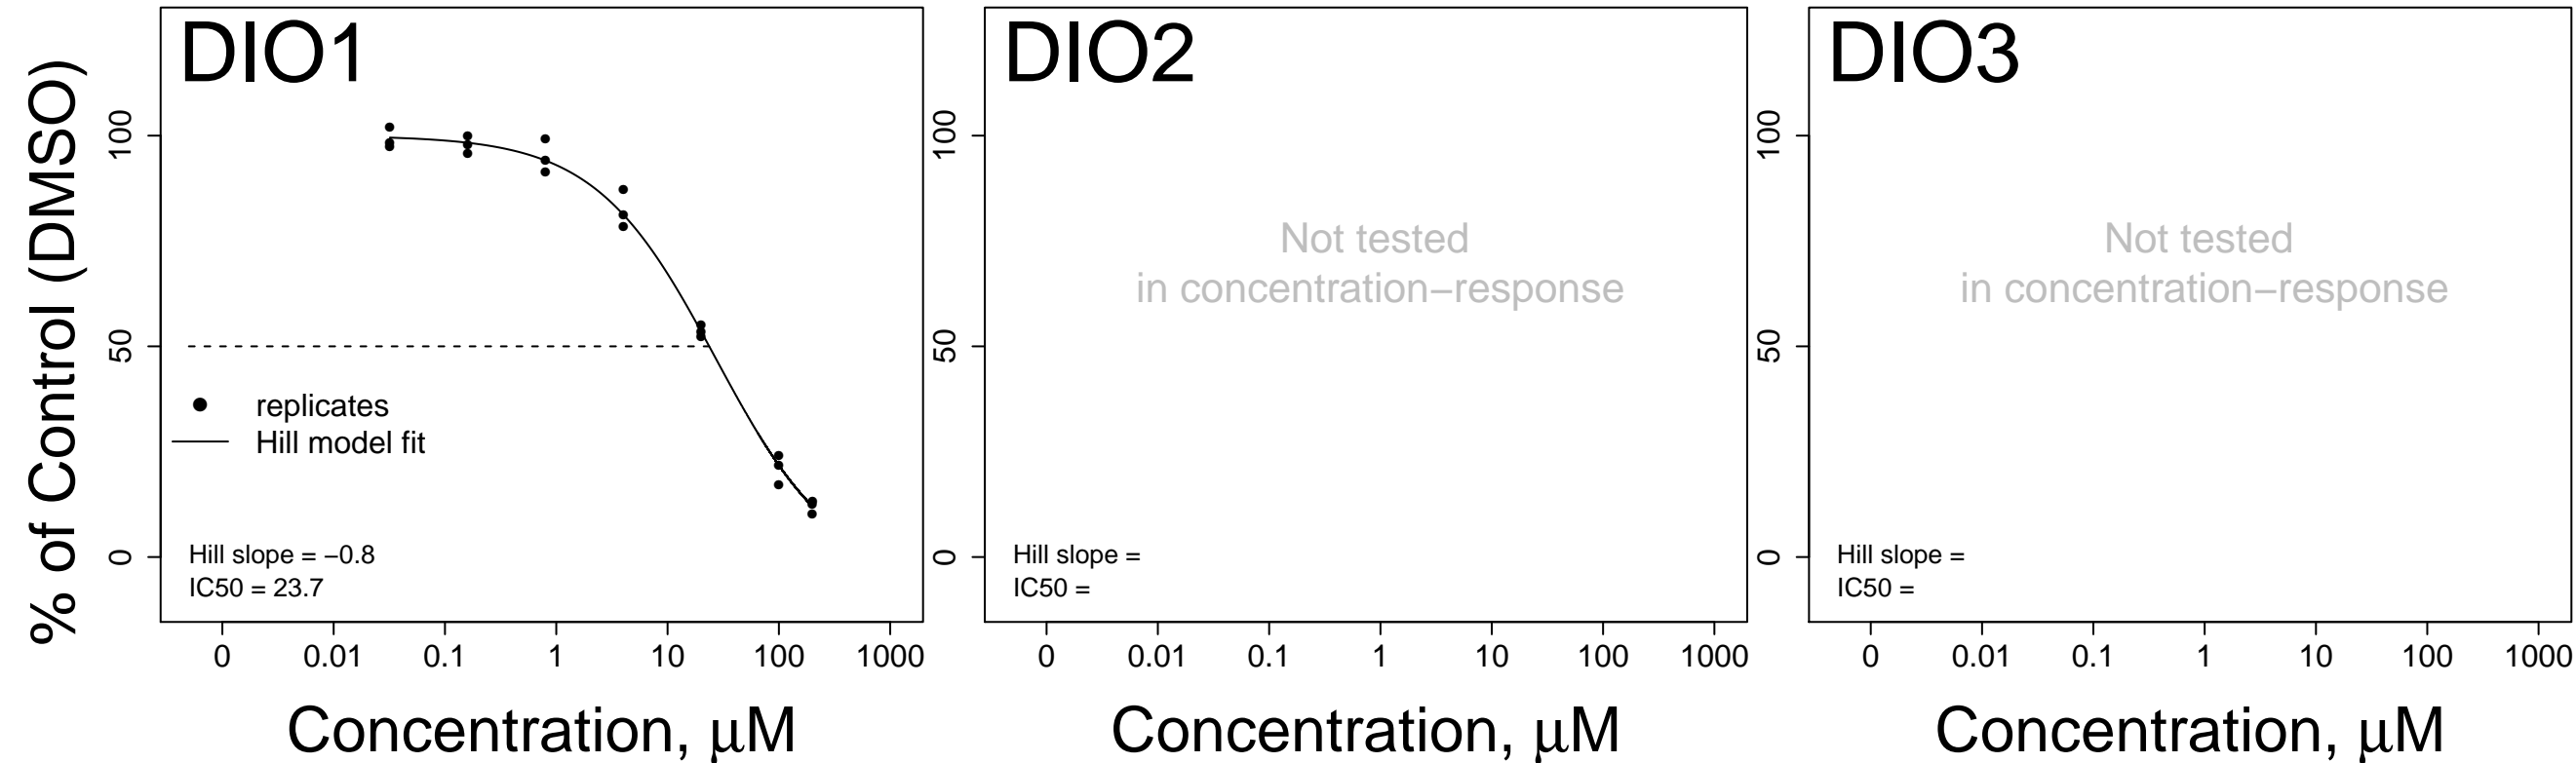

Tetracycline CASRN: 60-54-8

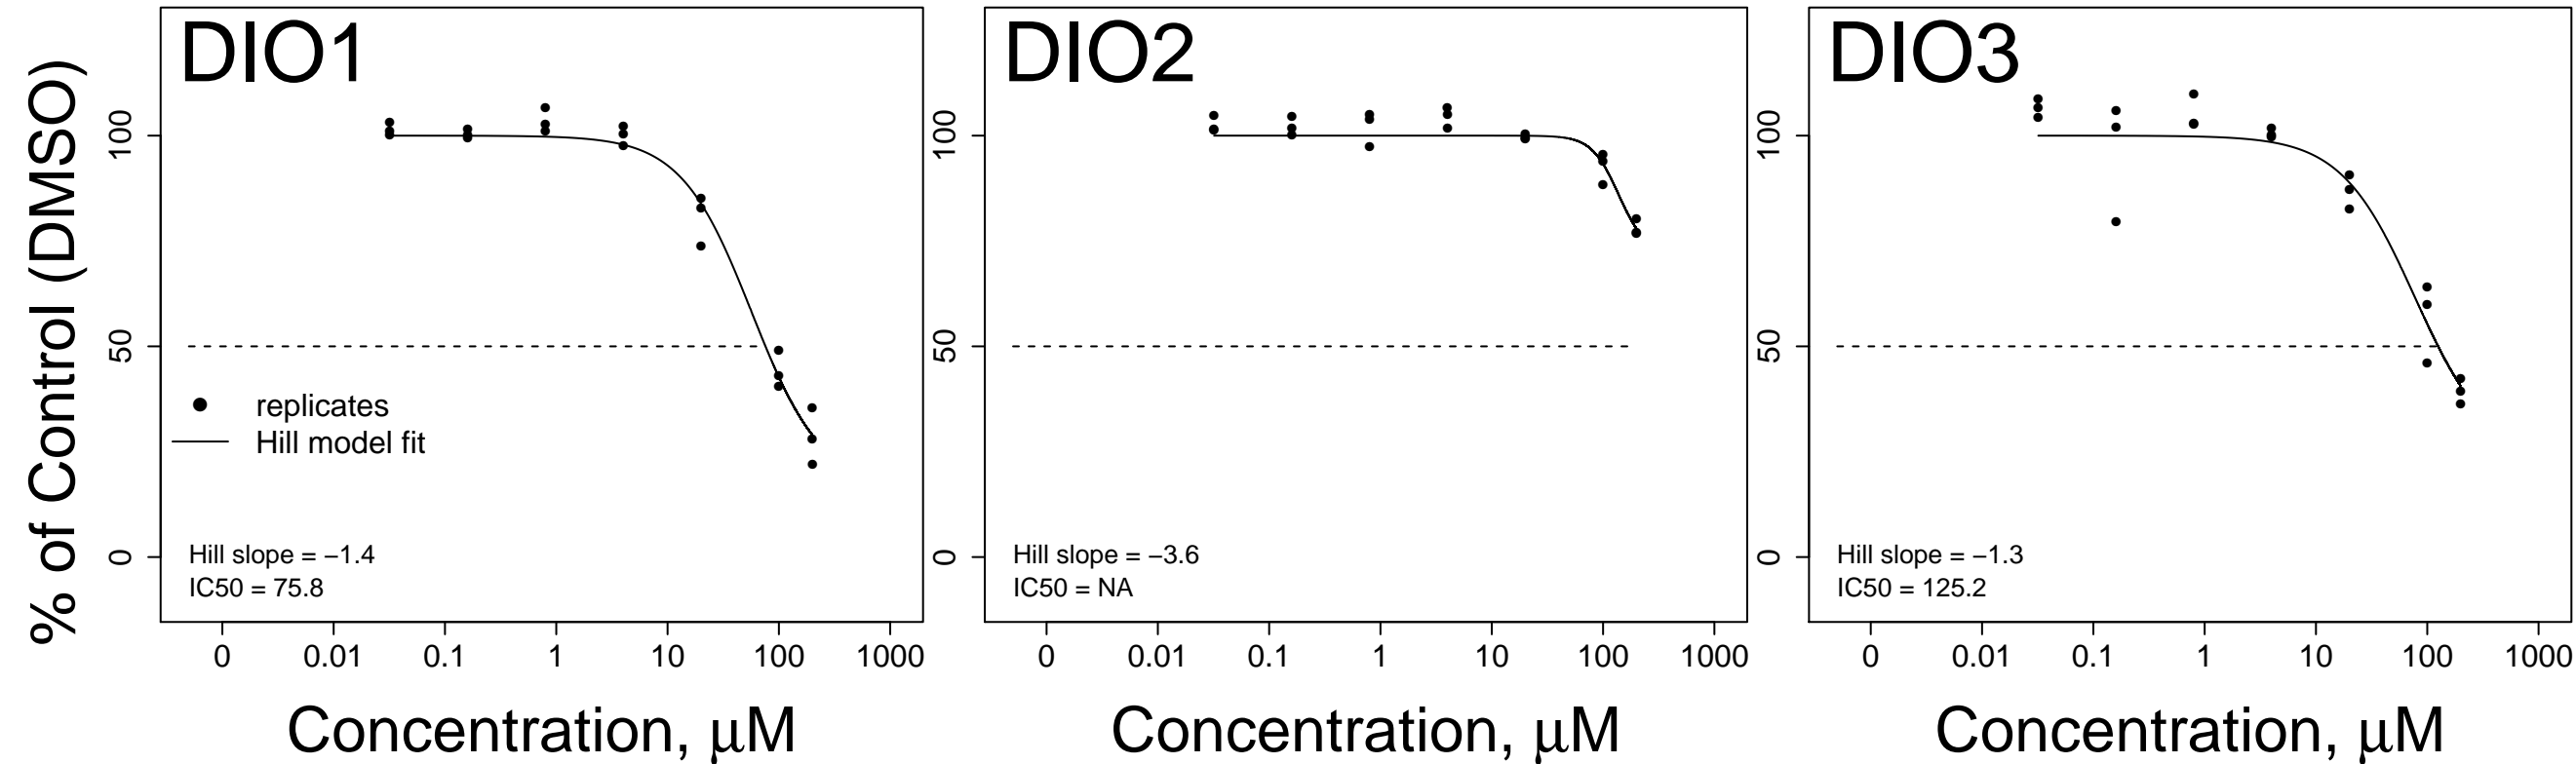

2,3-Dinitrotoluene CASRN: 602-01-7

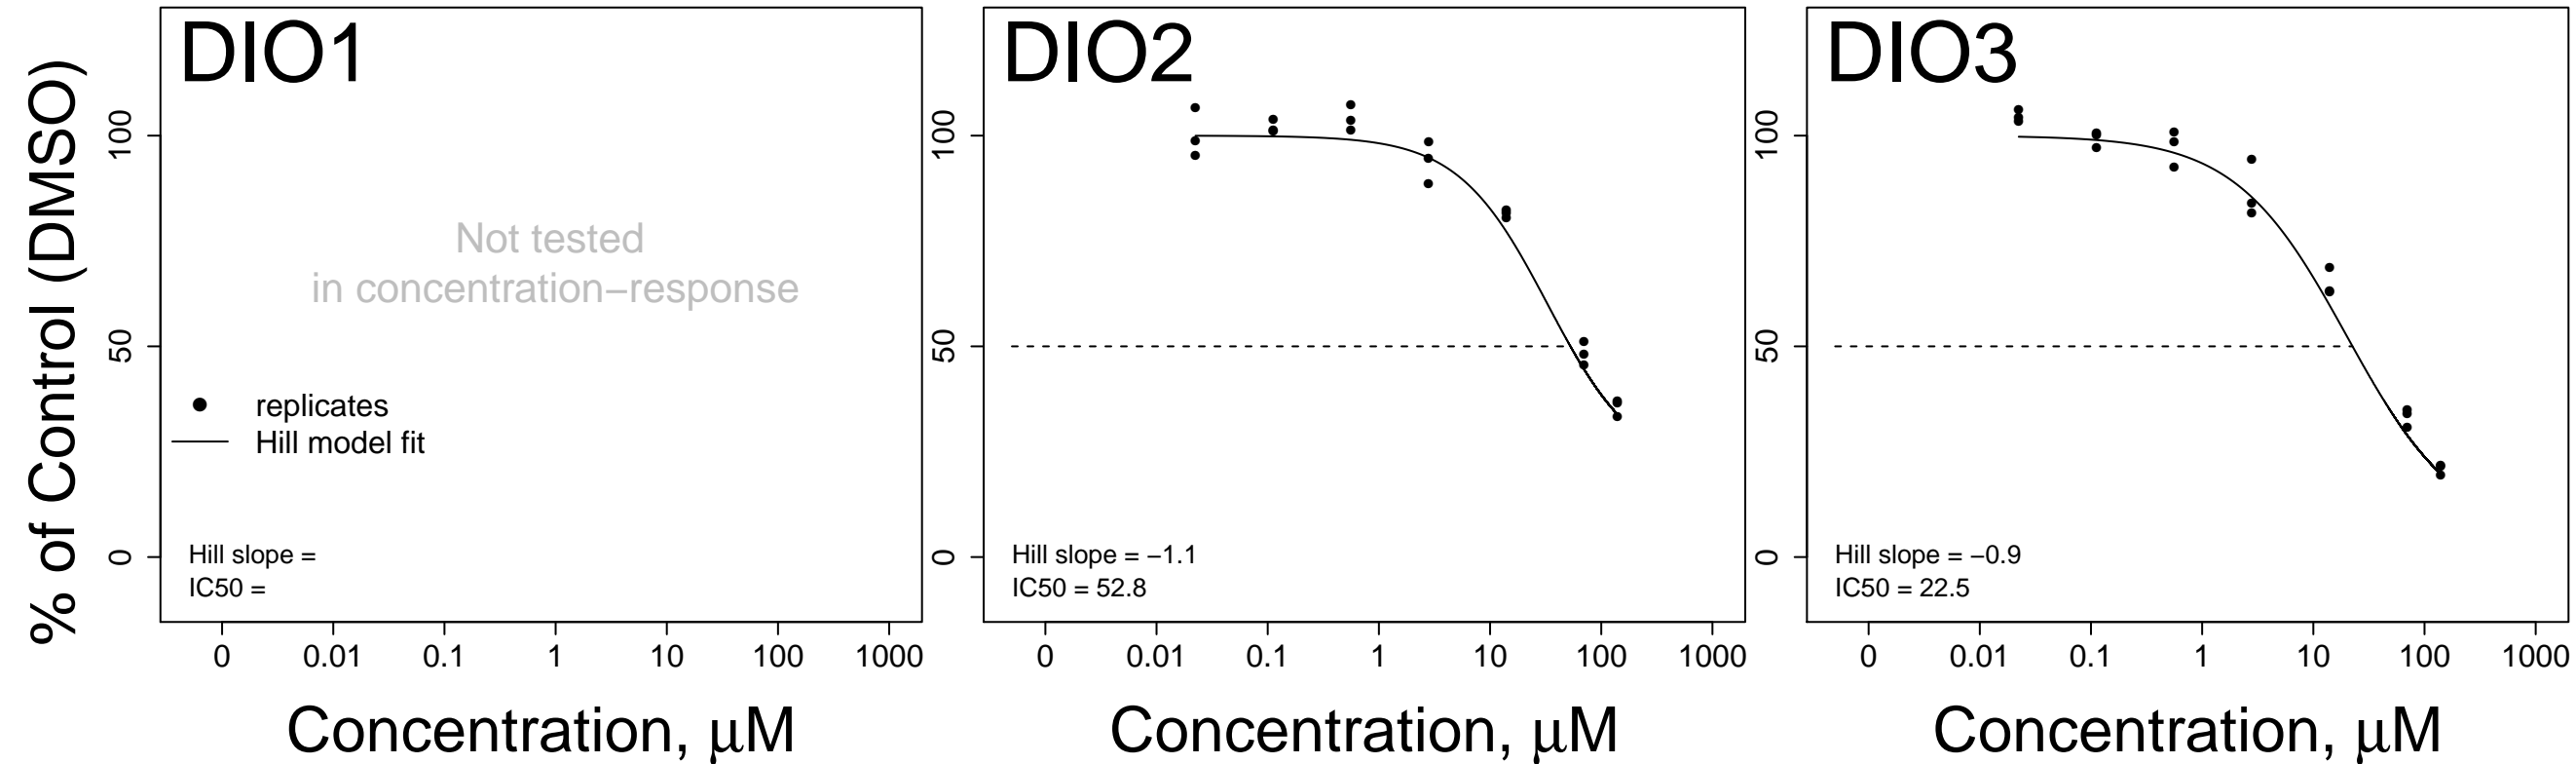

1,2-Benzenedicarboxaldehyde CASRN: 643-79-8

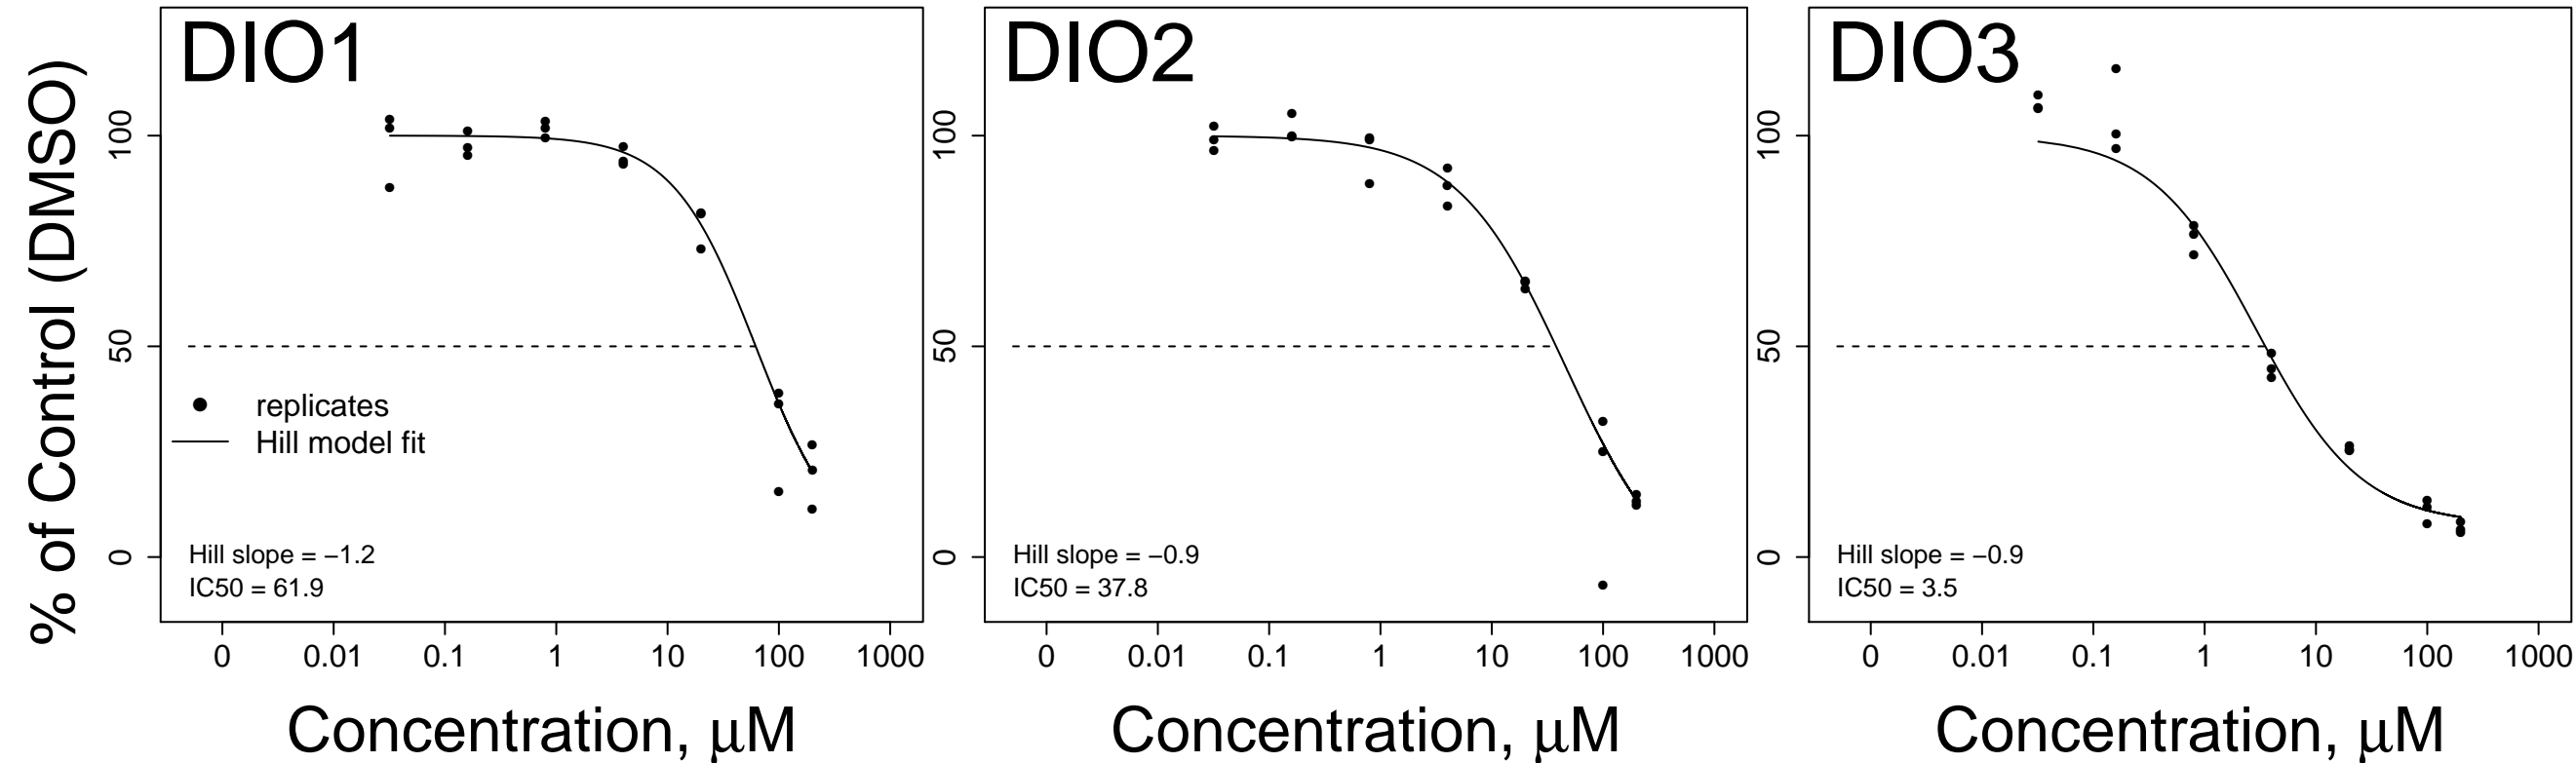

Retinol CASRN: 68-26-8

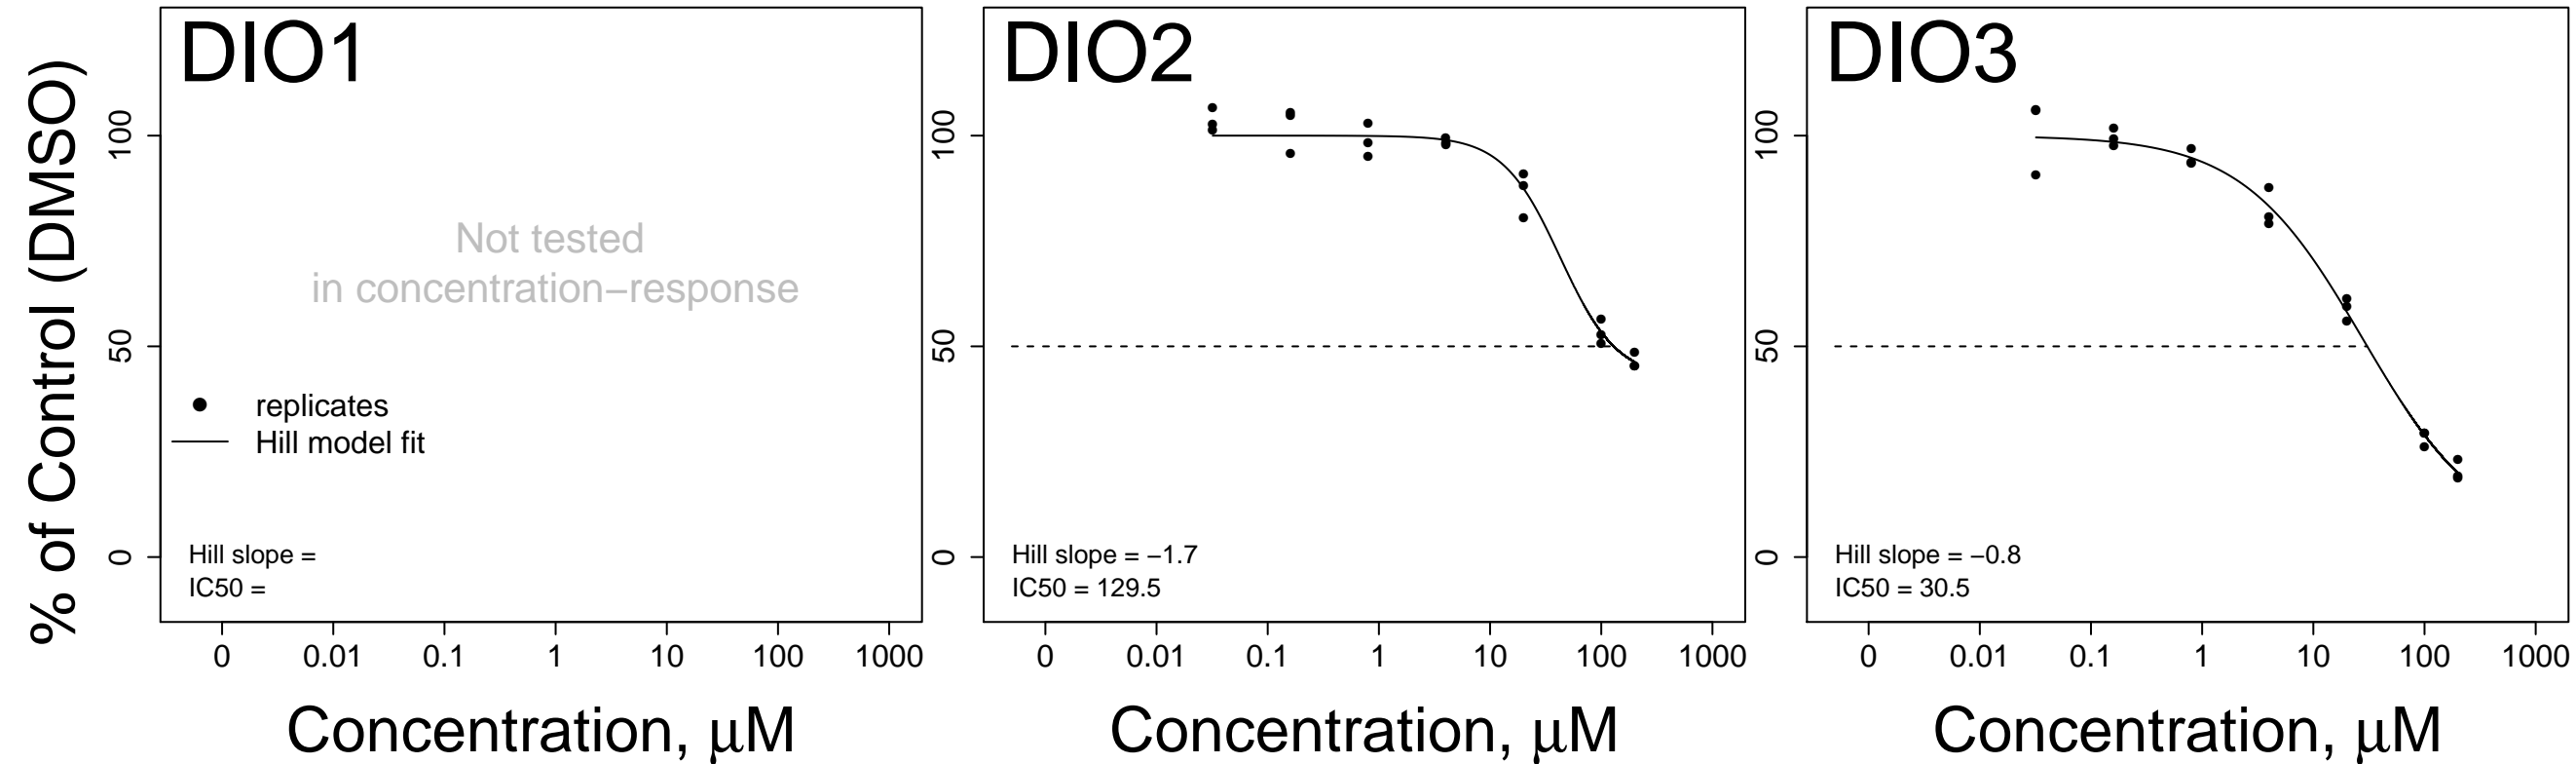



# 4-Hydroxytamoxifen CASRN: 68392-35-8

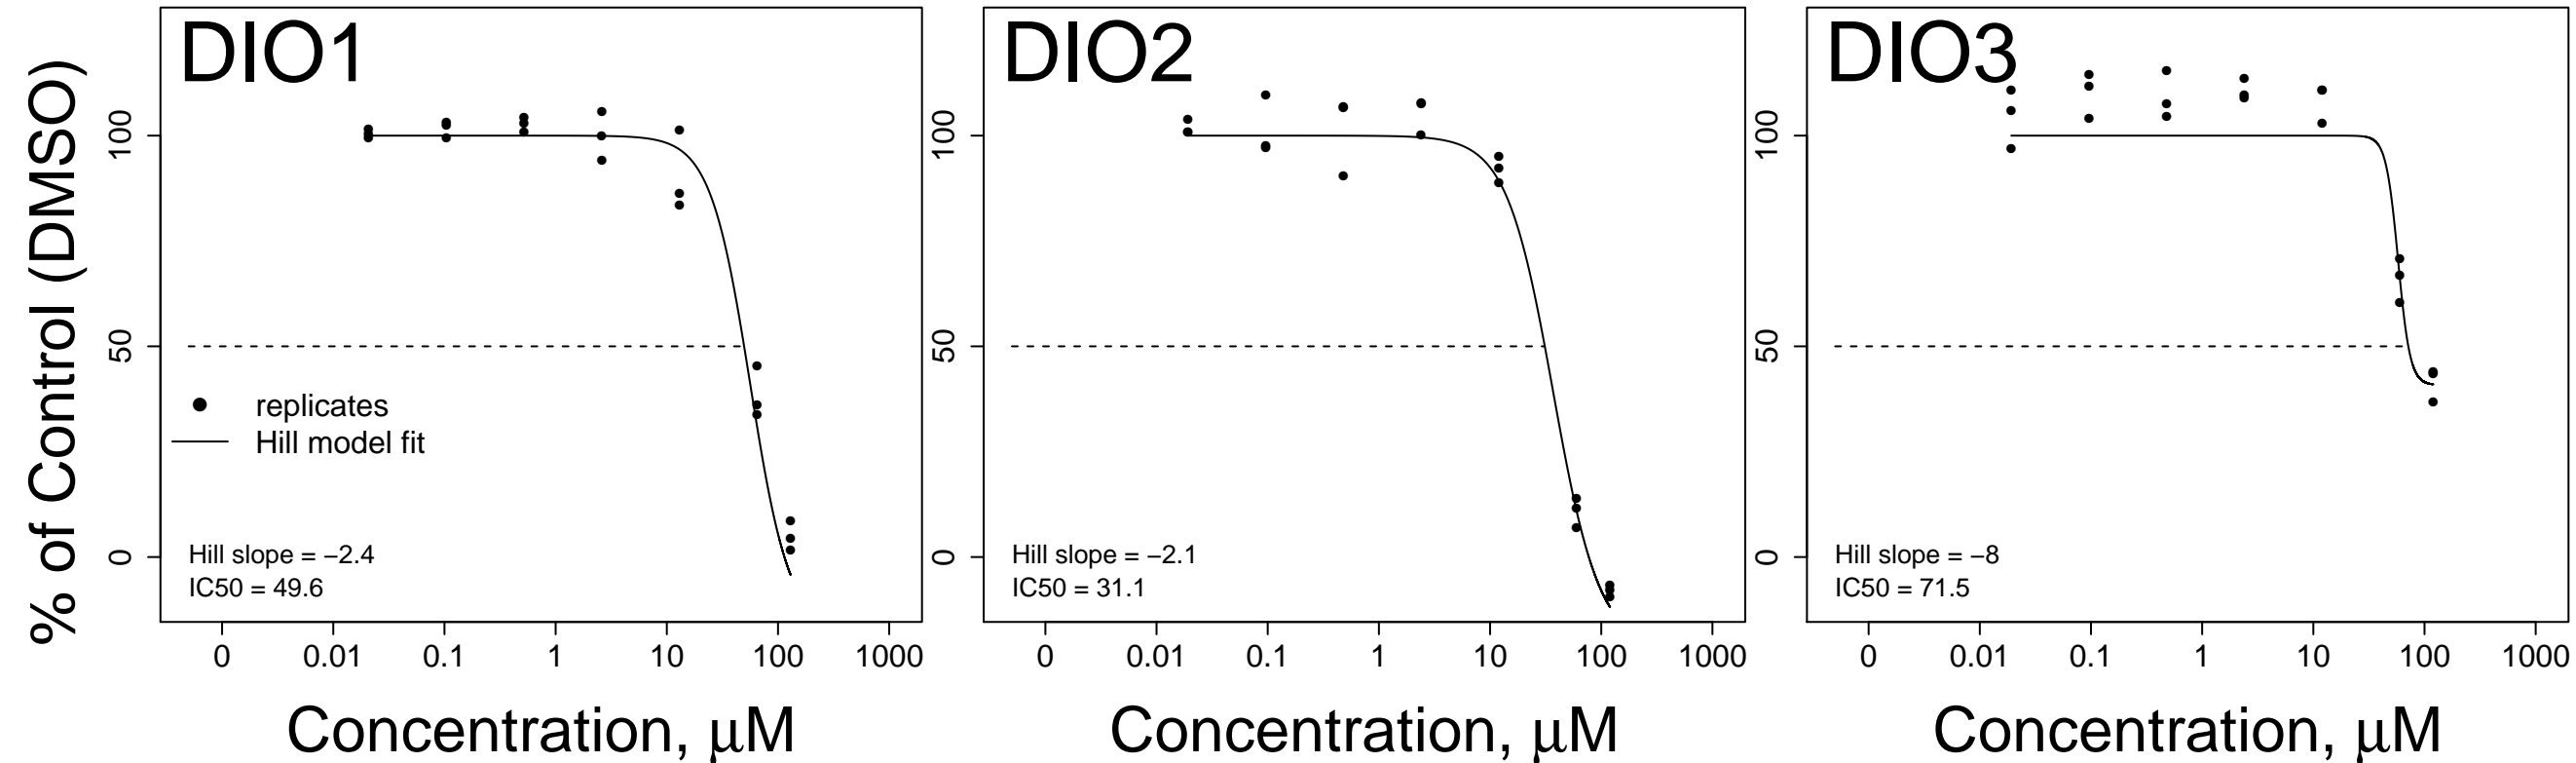

## PharmaGSID\_48519 CASRN: 686756-87-6

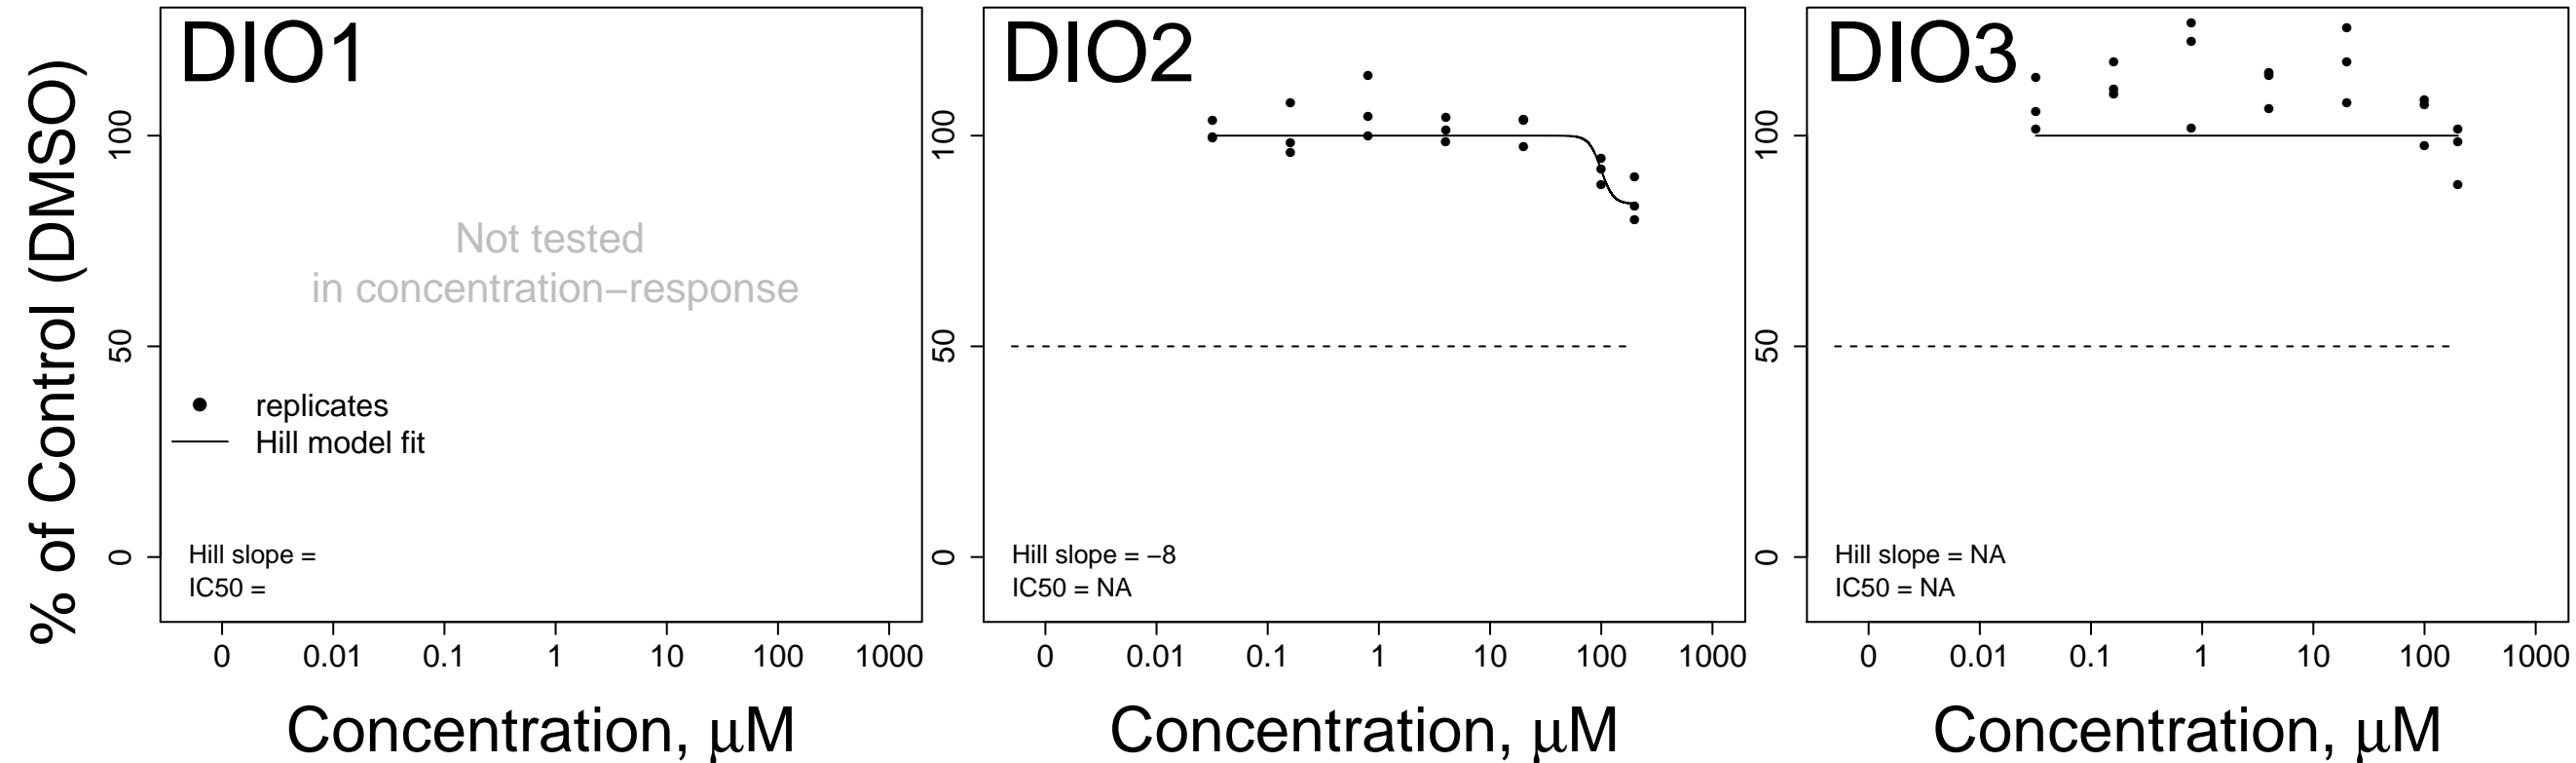

Chlorpromazine hydrochloride CASRN: 69-09-0

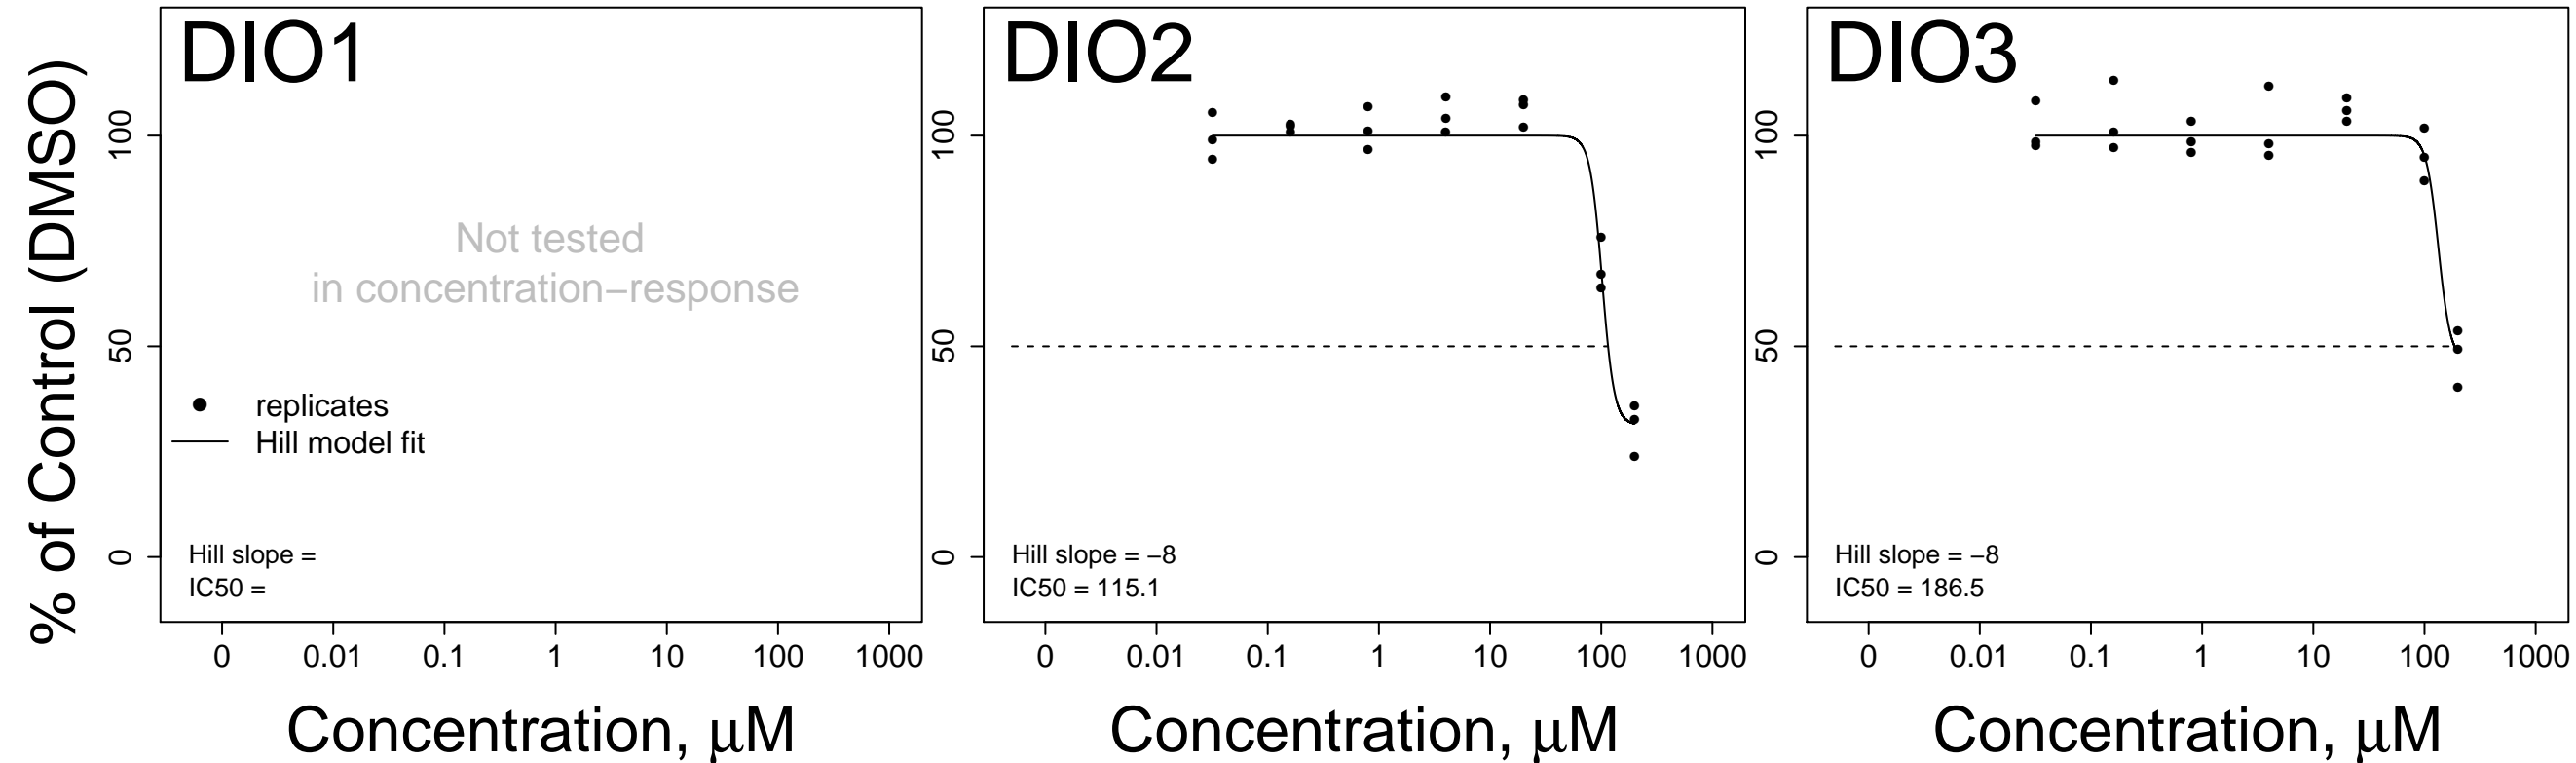

Didecyldimethylammonium chloride CASRN: 7173-51-5

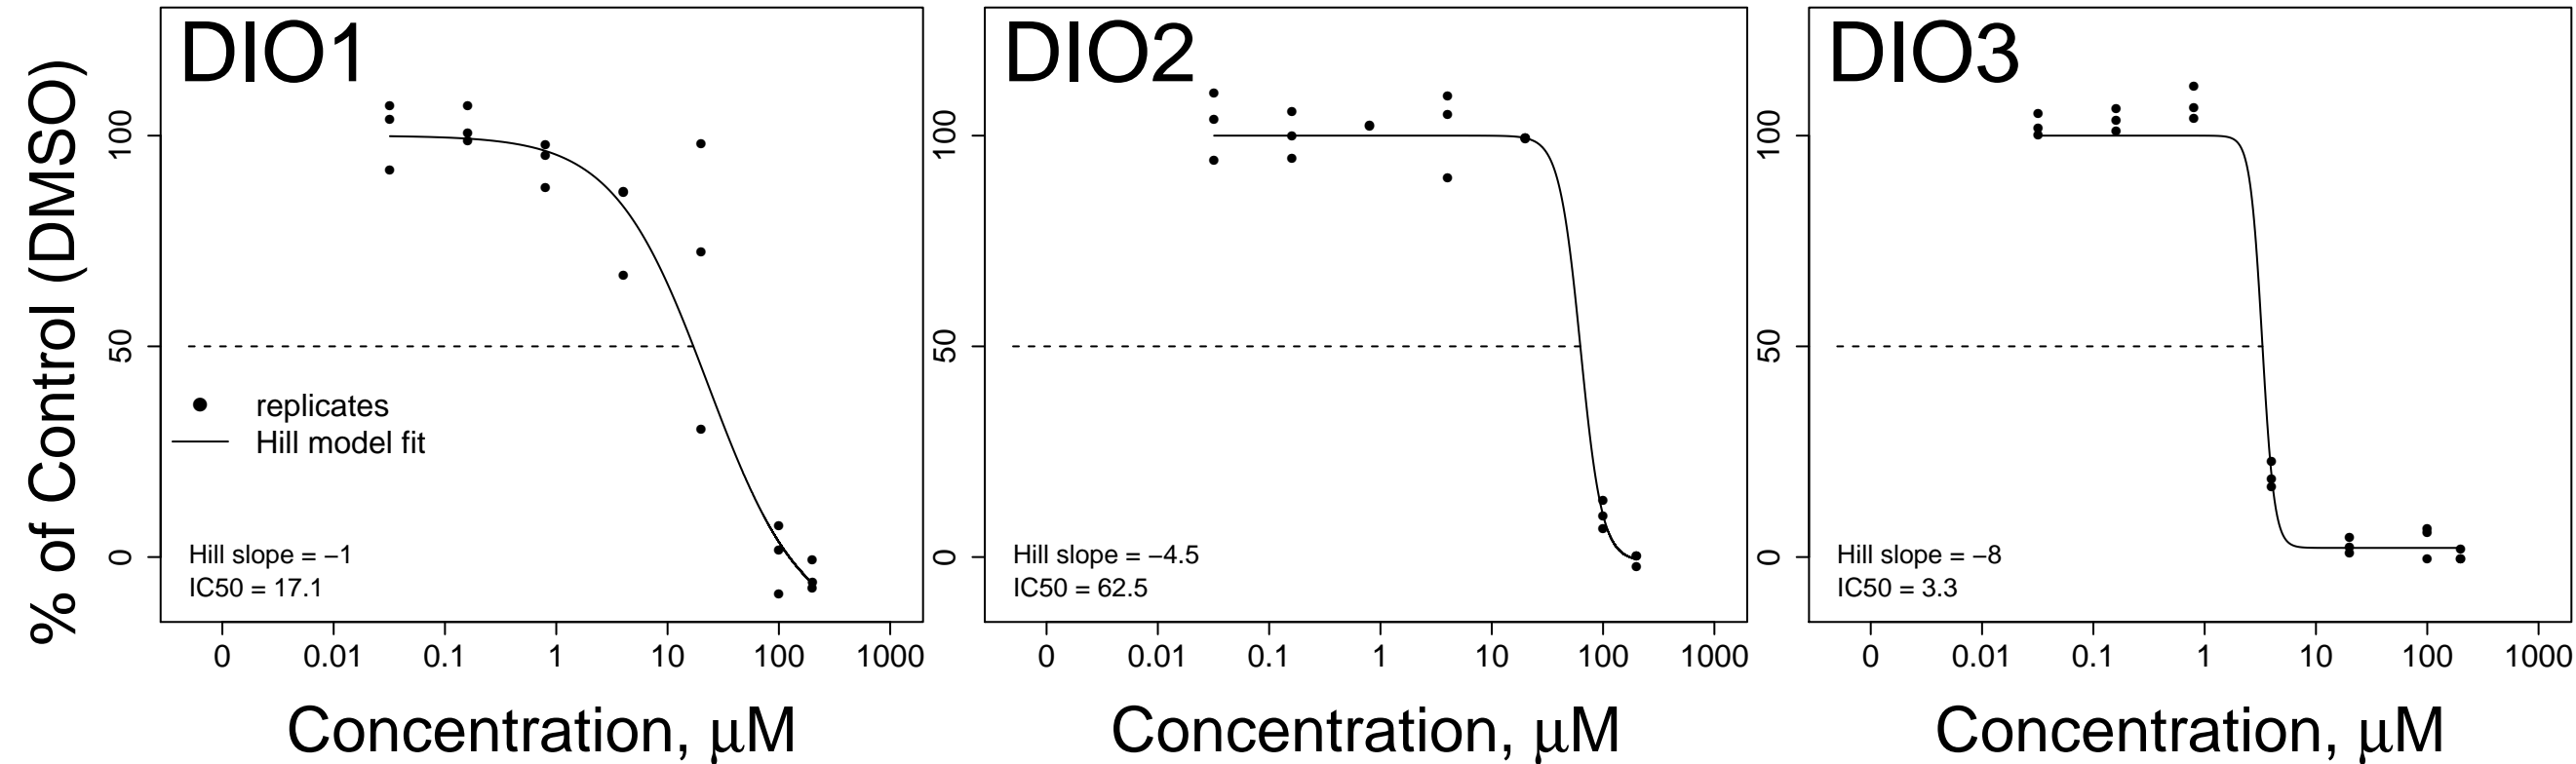

AVE5638 CASRN: 725228-45-5

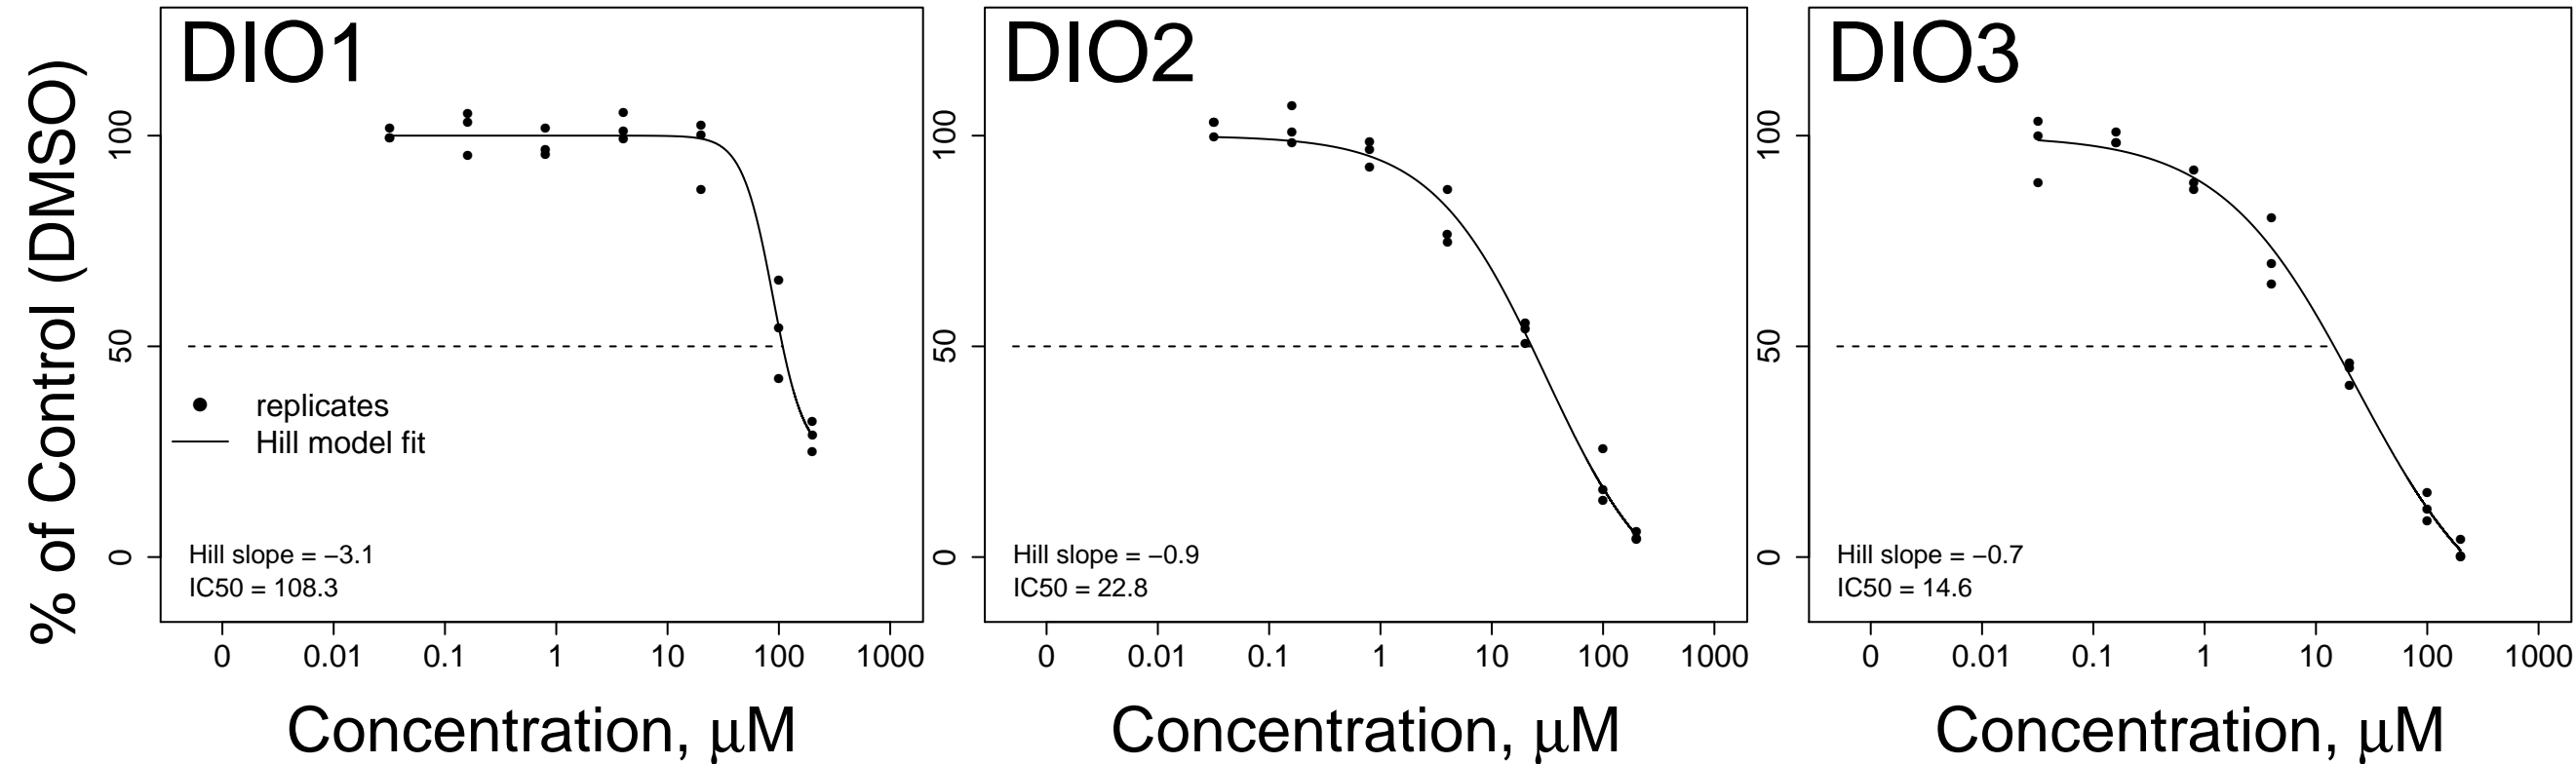

Phosmet CASRN: 732-11-6

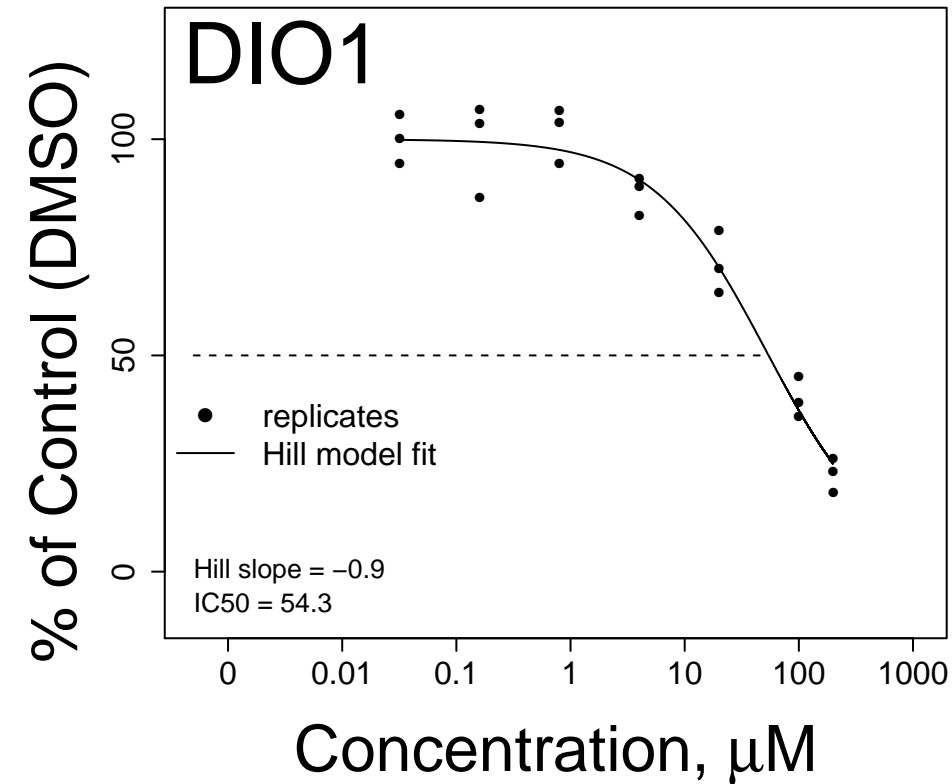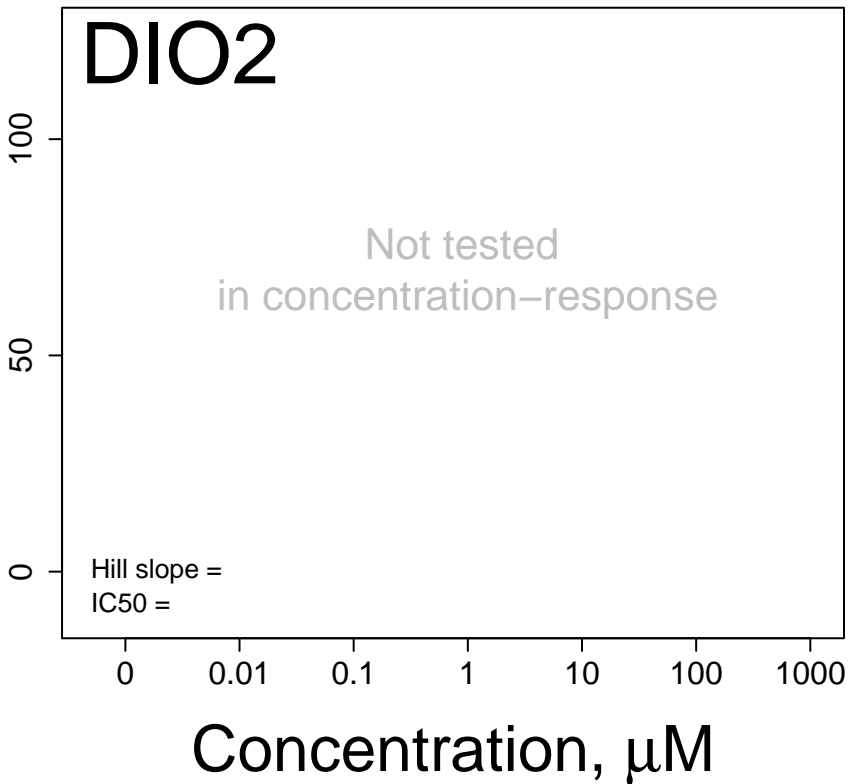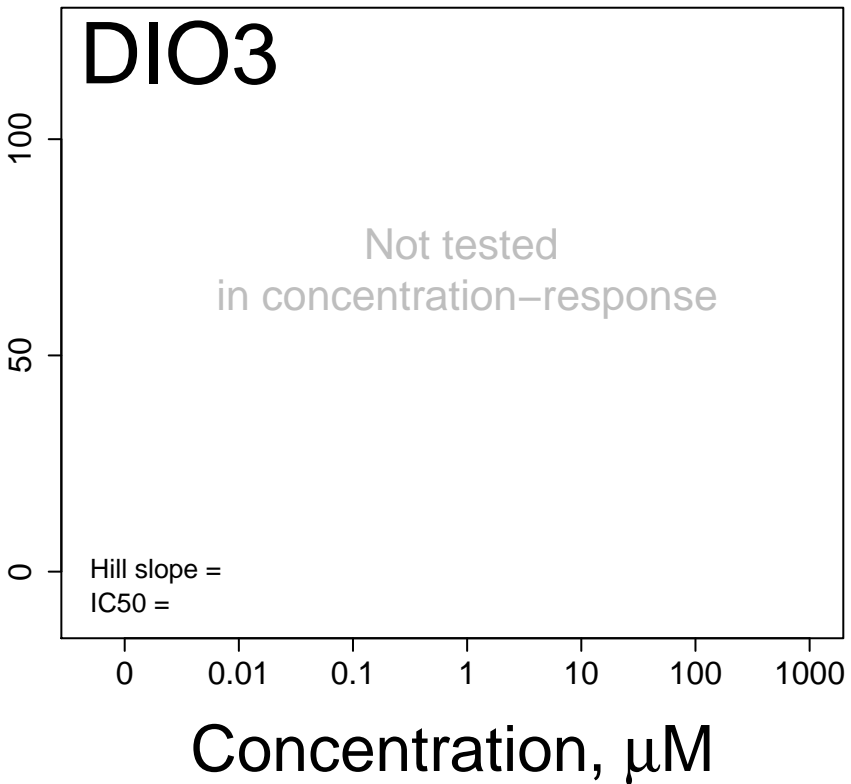

Diphenyl isophthalate CASRN: 744-45-6

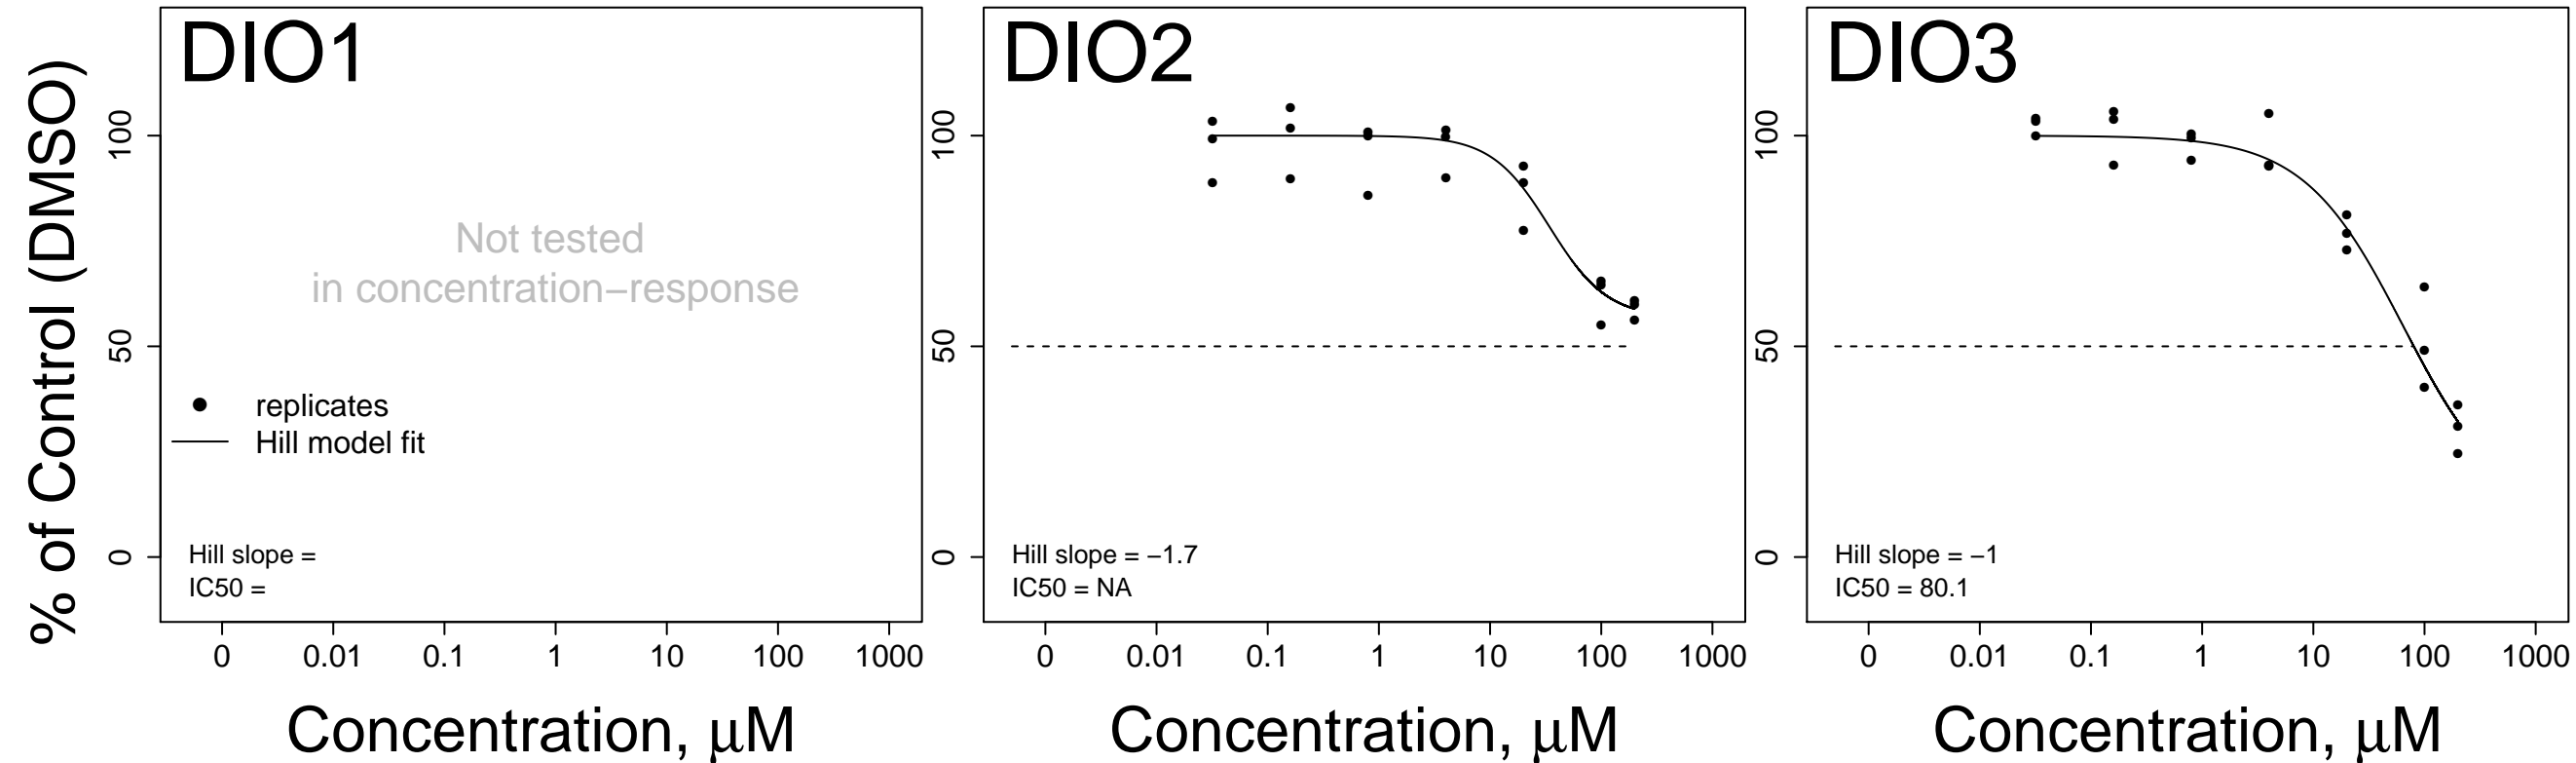

Lovastatin CASRN: 75330-75-5

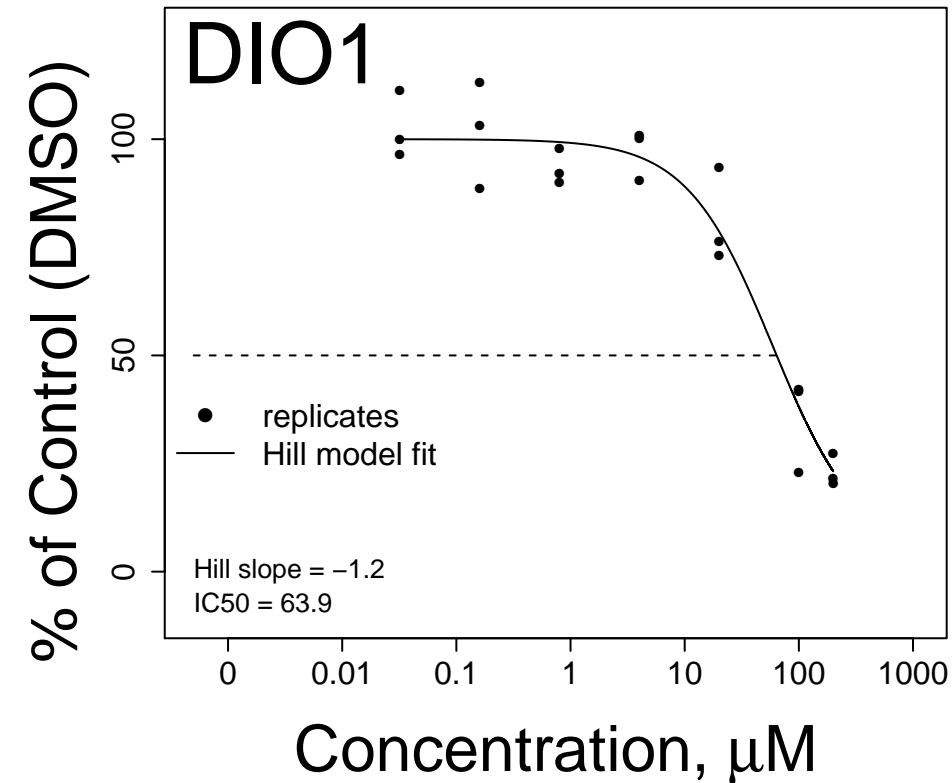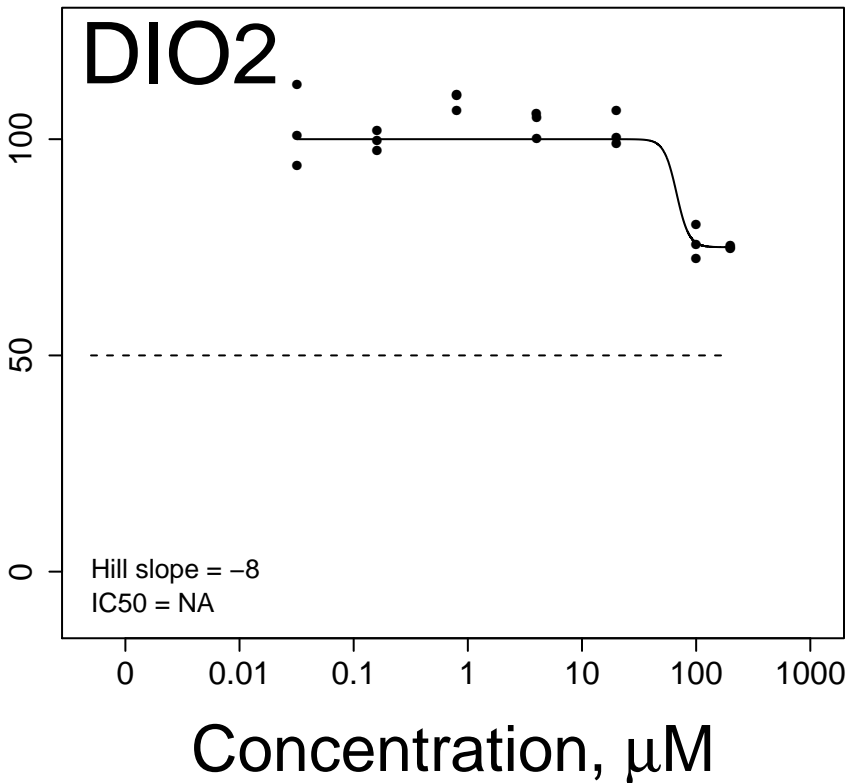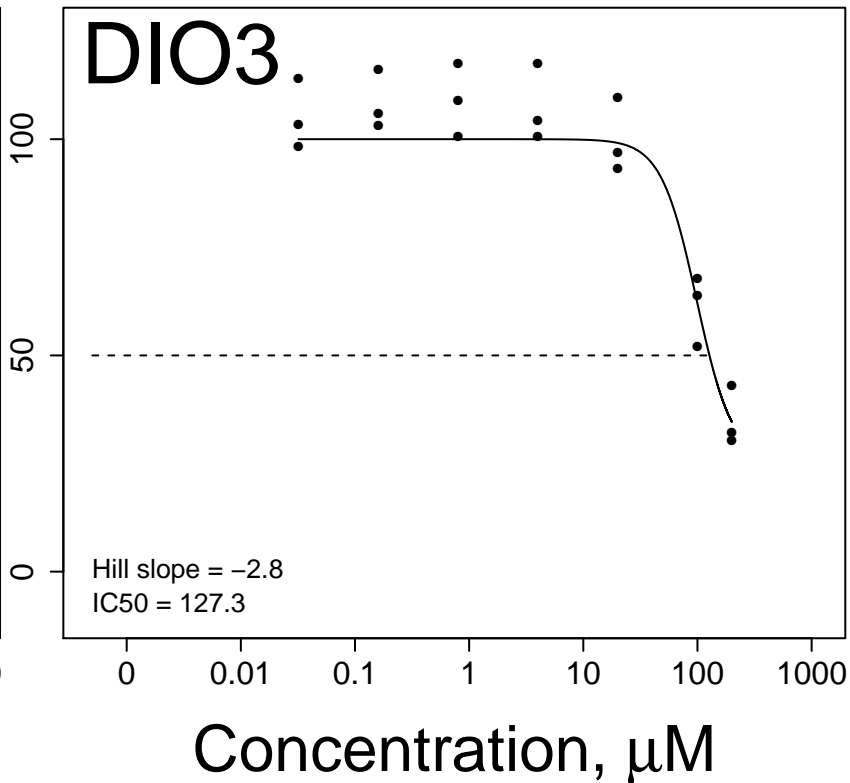



# Hexachlorocyclopentadiene CASRN: 77-47-4

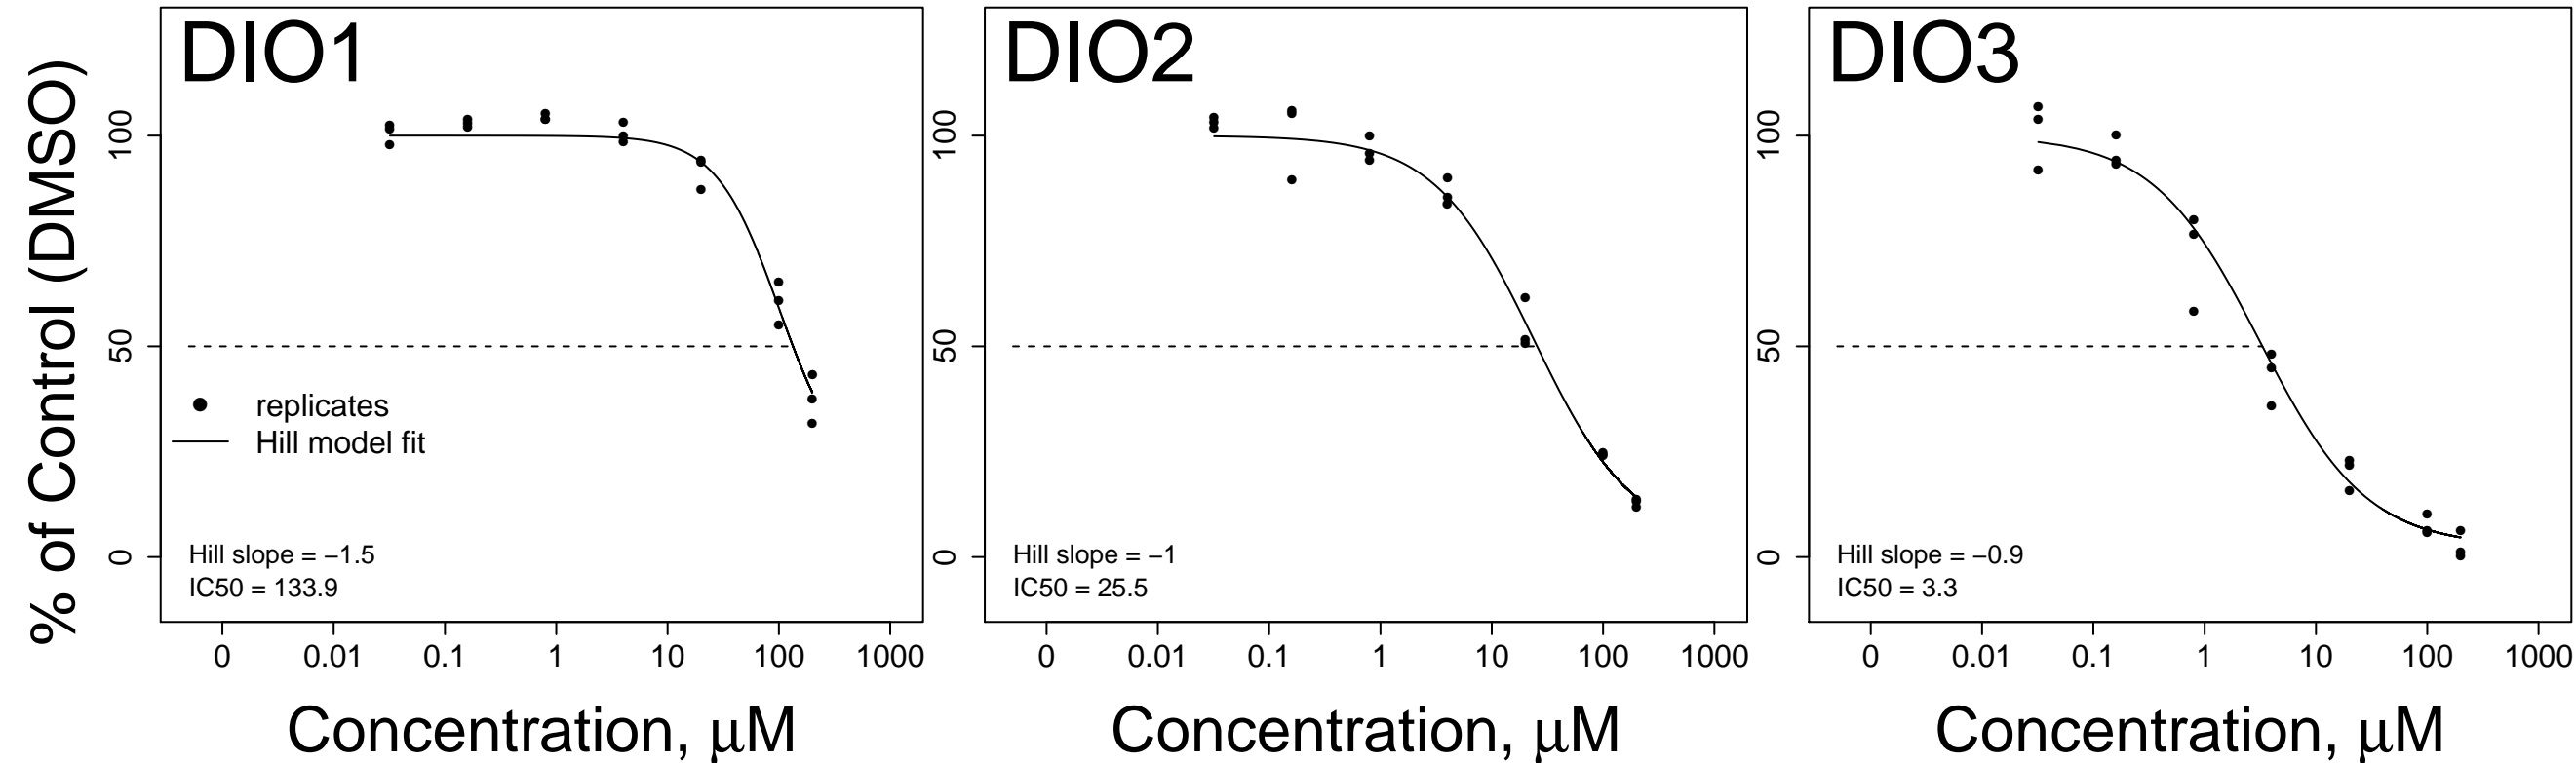

3,3',5,5'-Tetrabromobisphenol A CASRN: 79-94-7

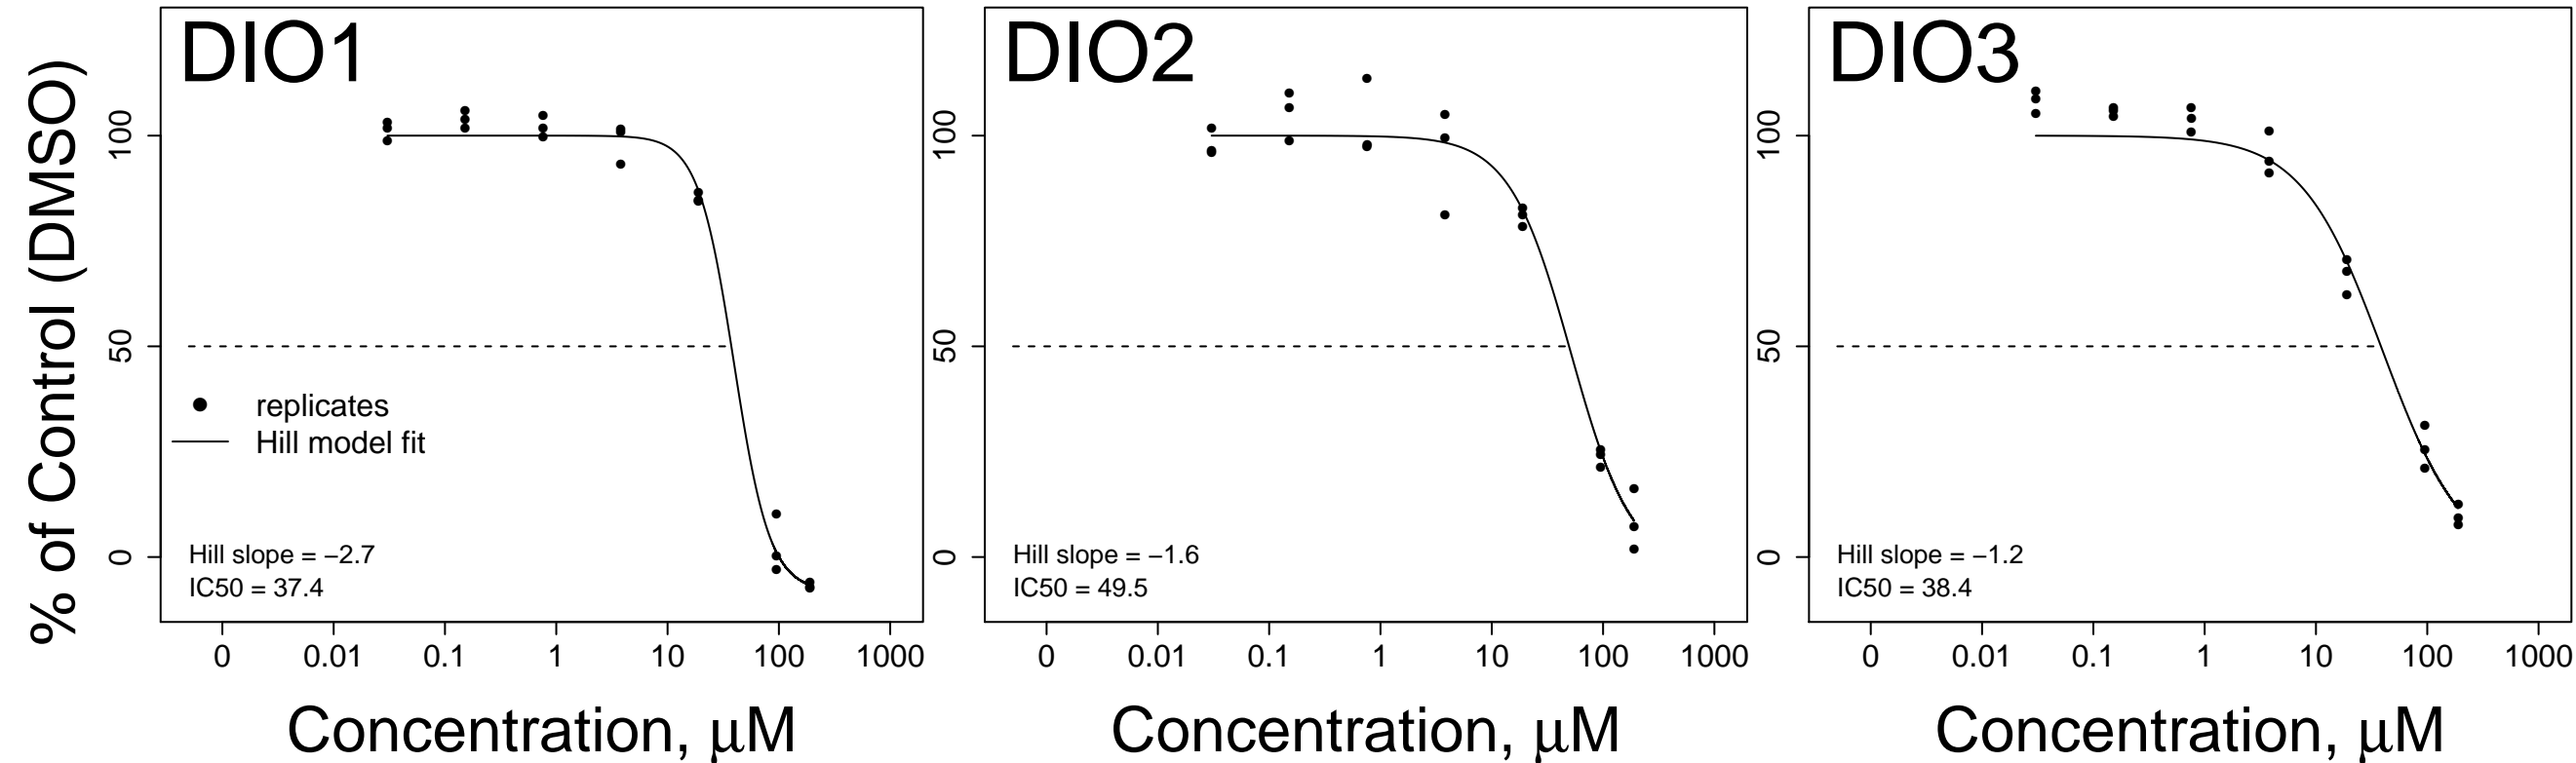

Simvastatin CASRN: 79902-63-9

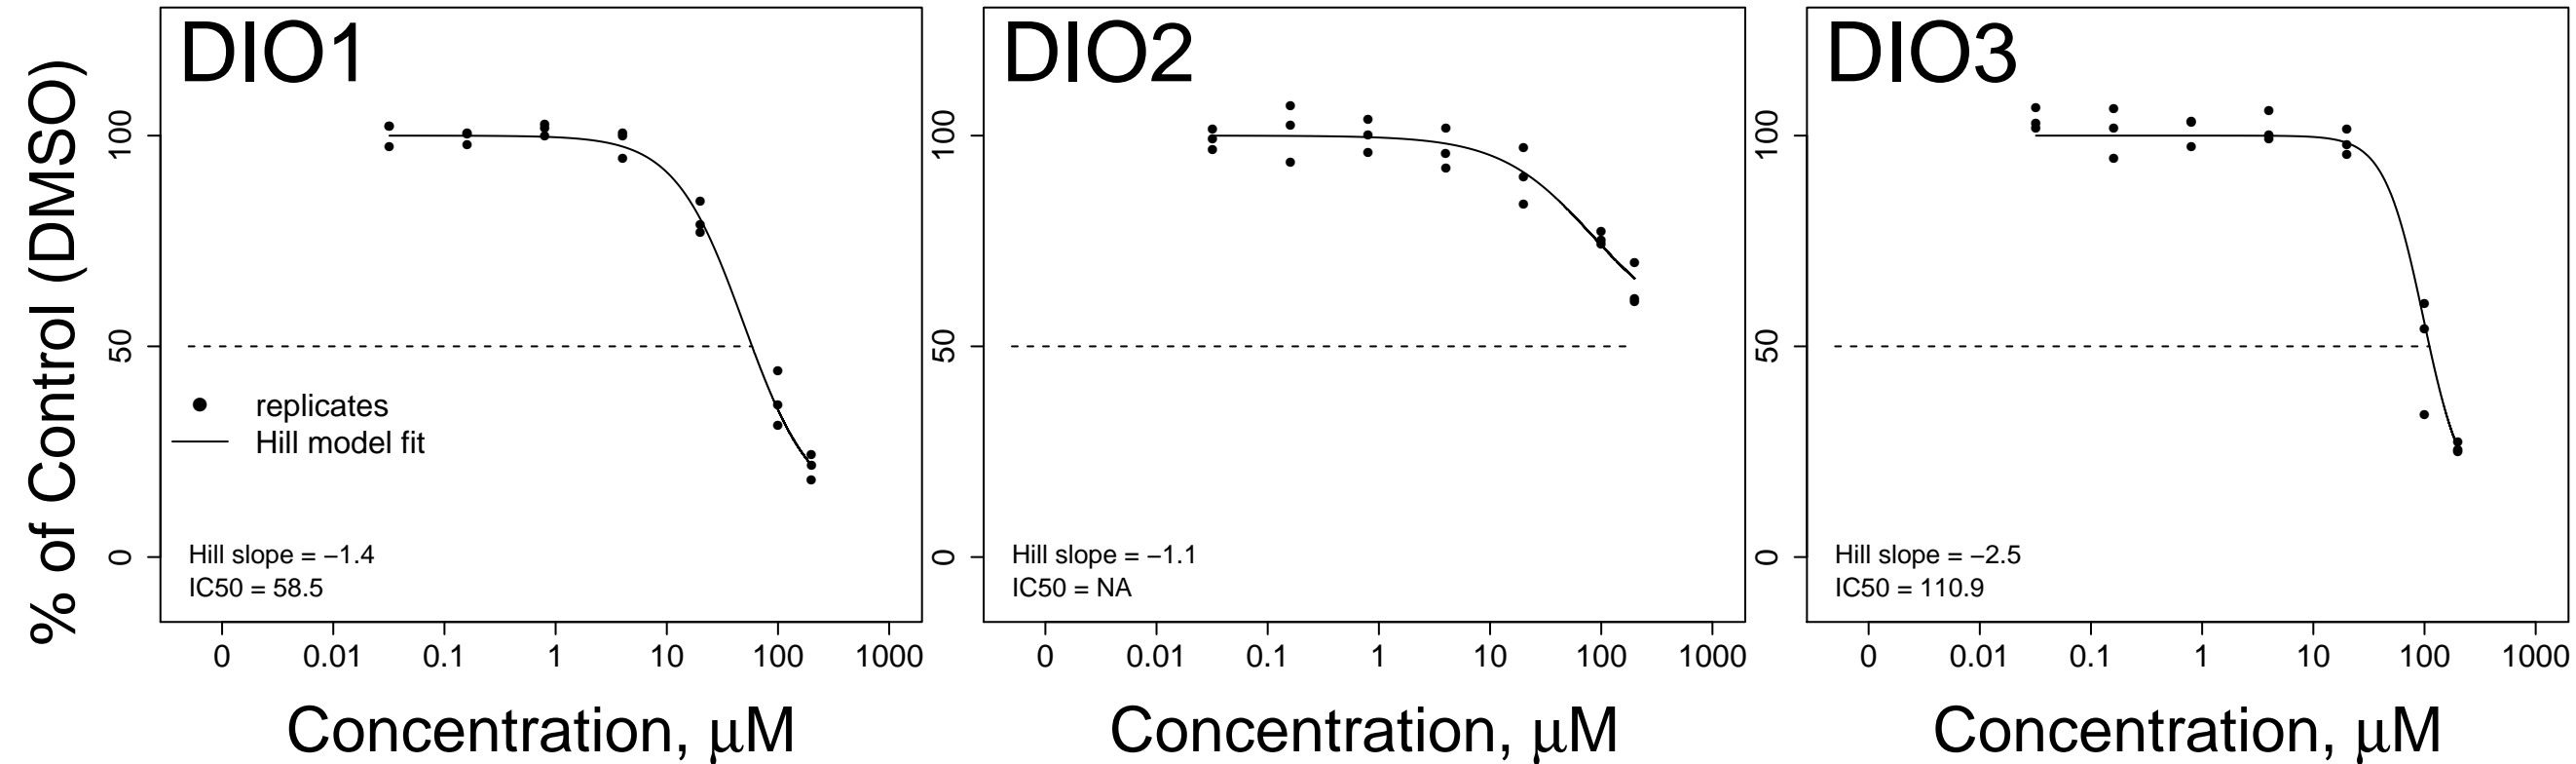

Dapsone CASRN: 80-08-0

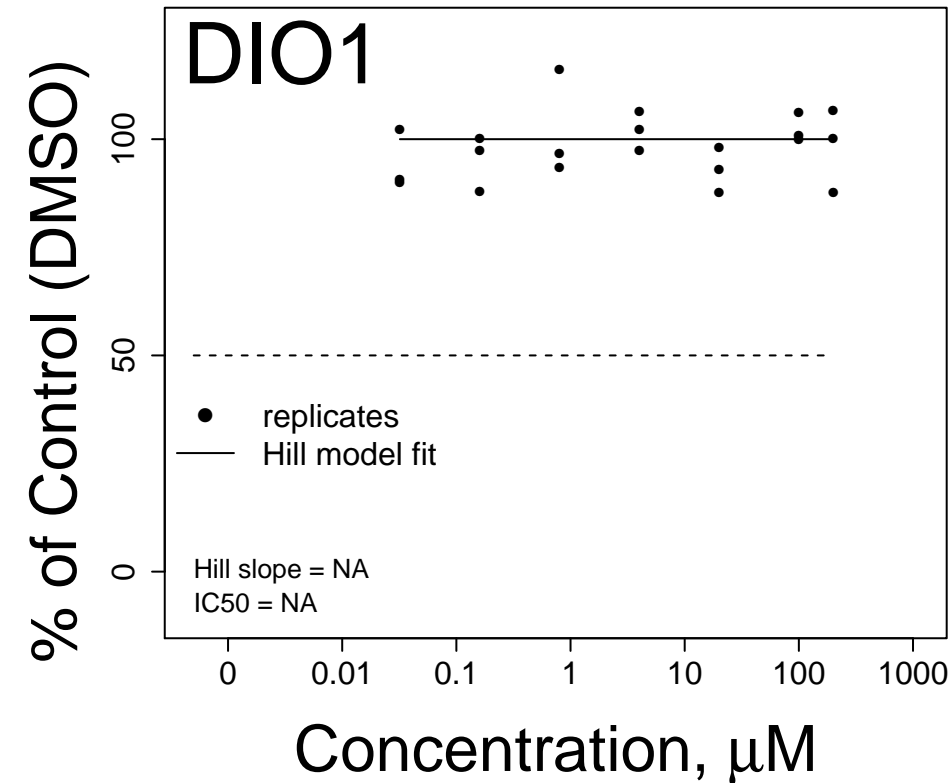

Butyryl trihexyl citrate CASRN: 82469-79-2

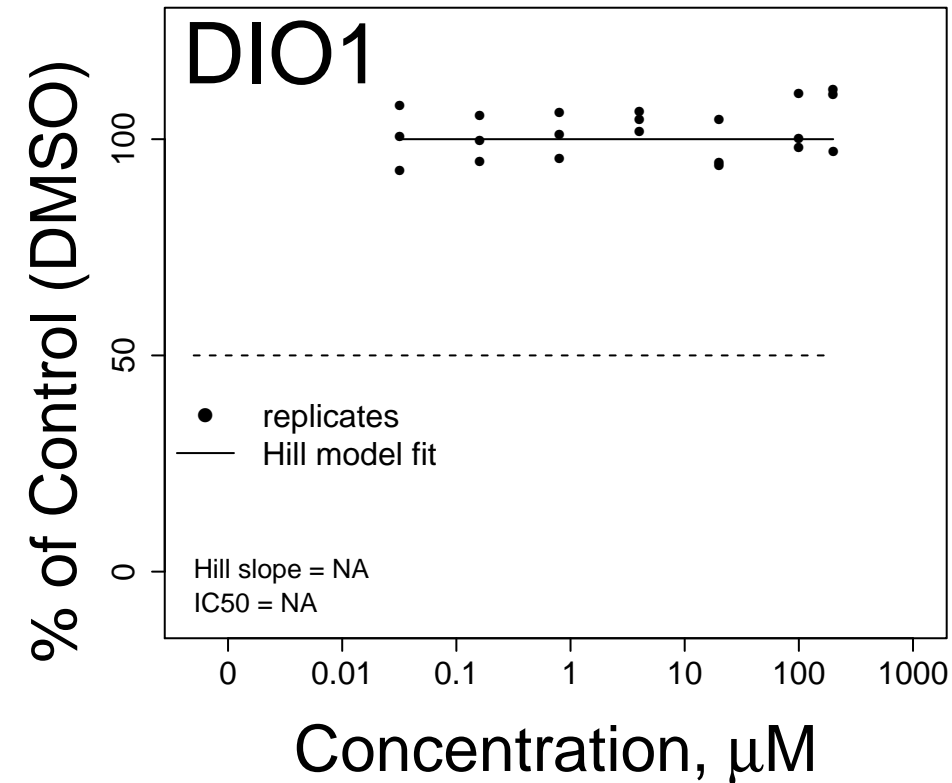

Raloxifene hydrochloride CASRN: 82640-04-8

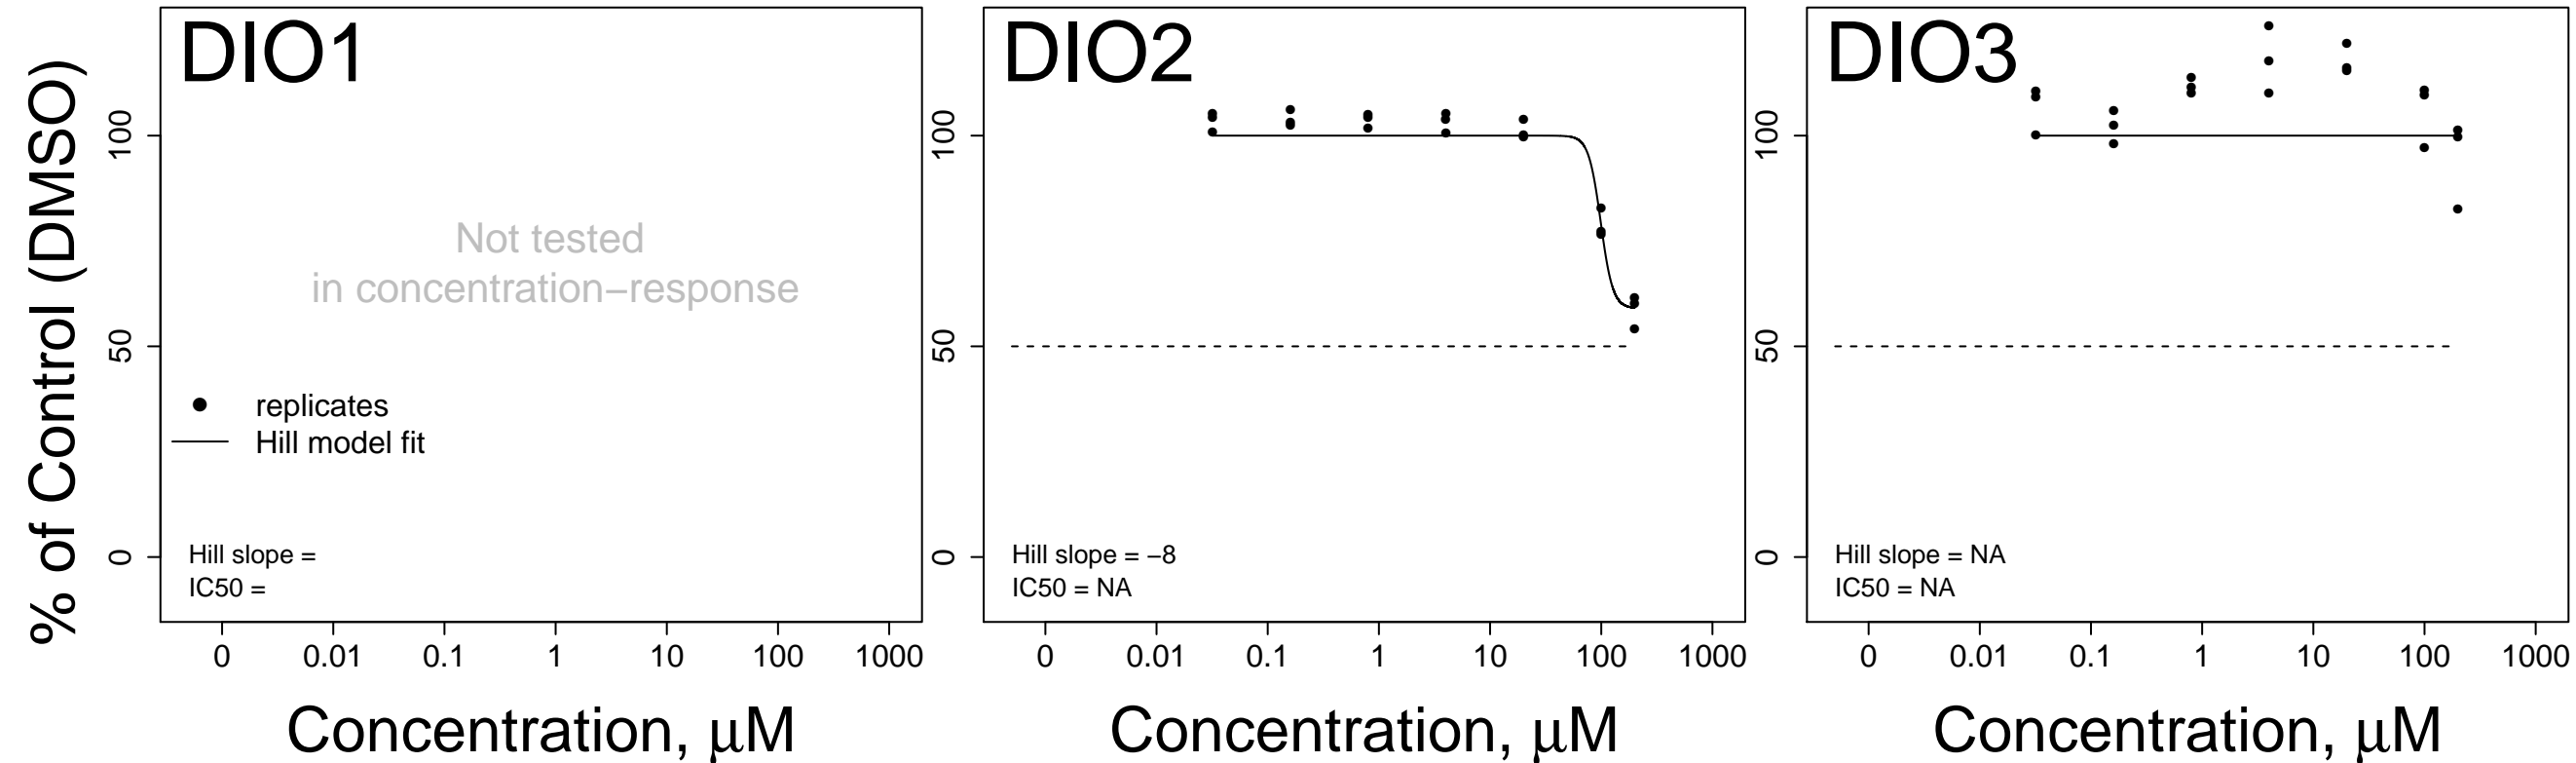

4-Nonylphenol, branched CASRN: 84852-15-3

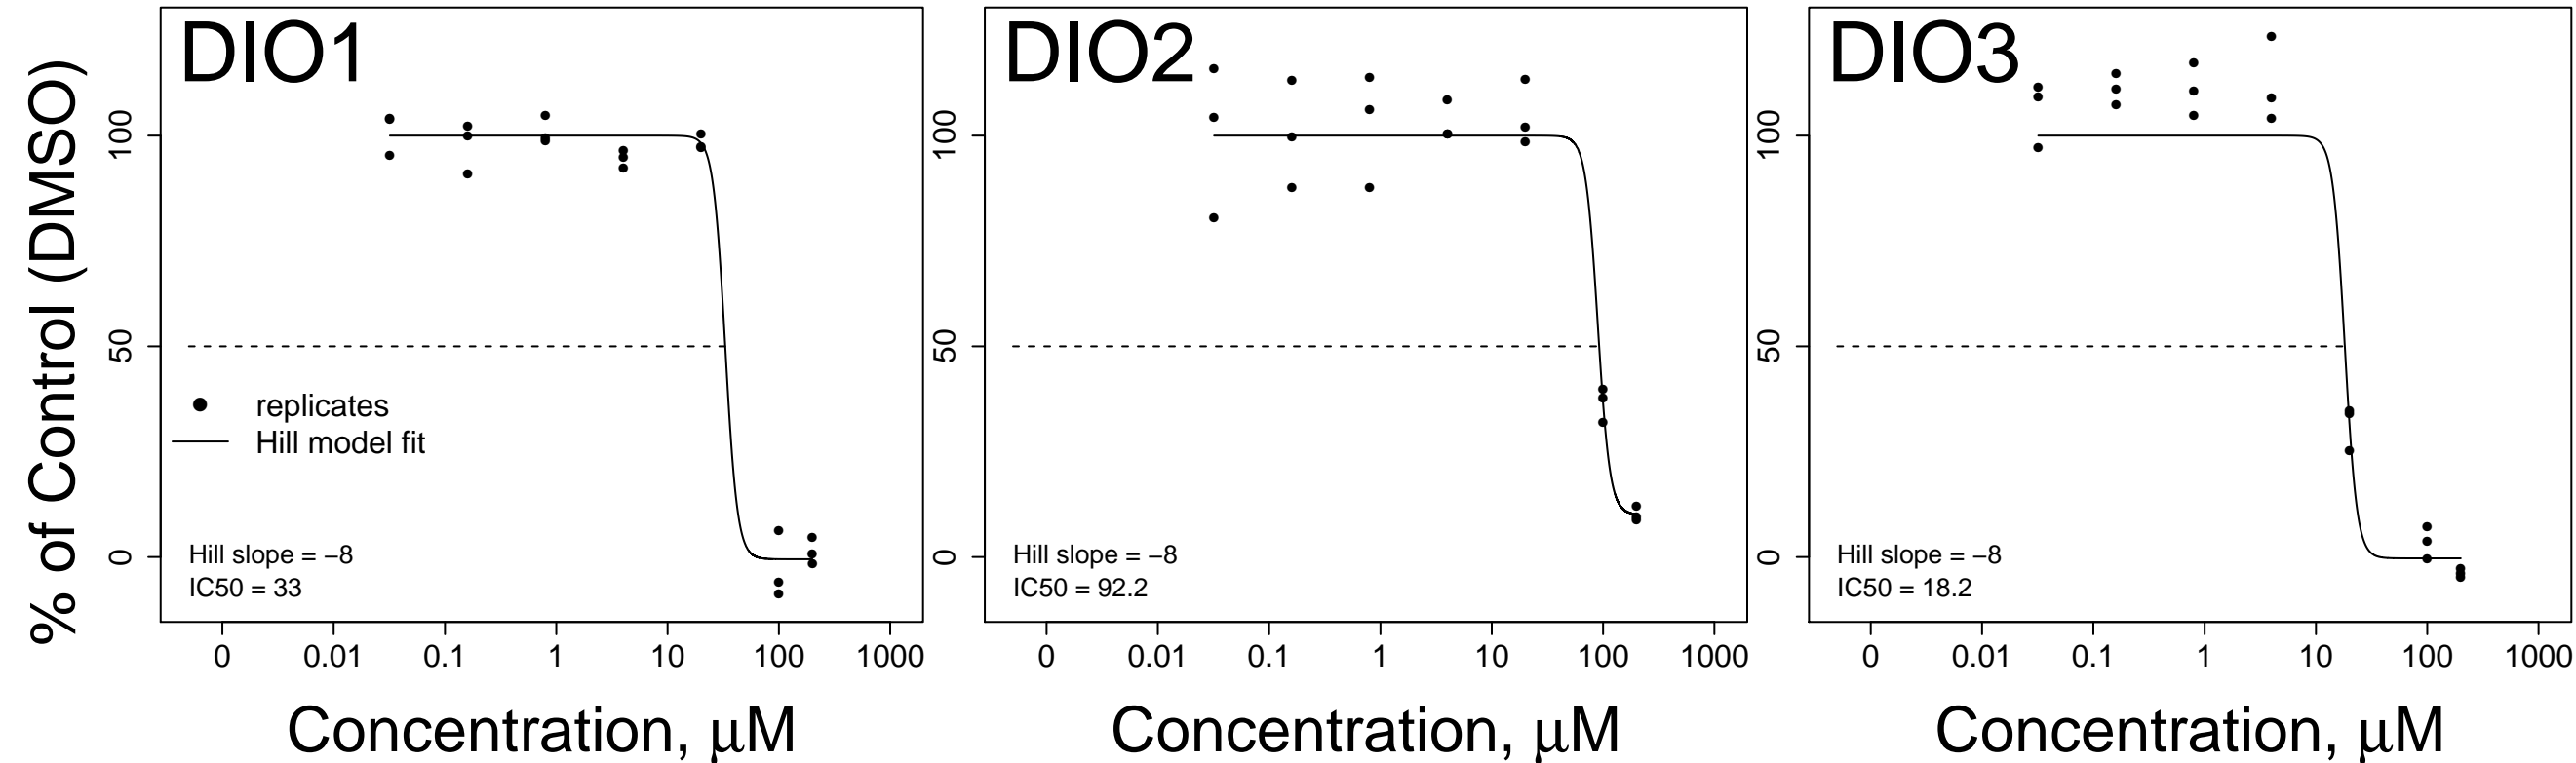

2,4-Di-tert-butylphenol CASRN: 96-76-4

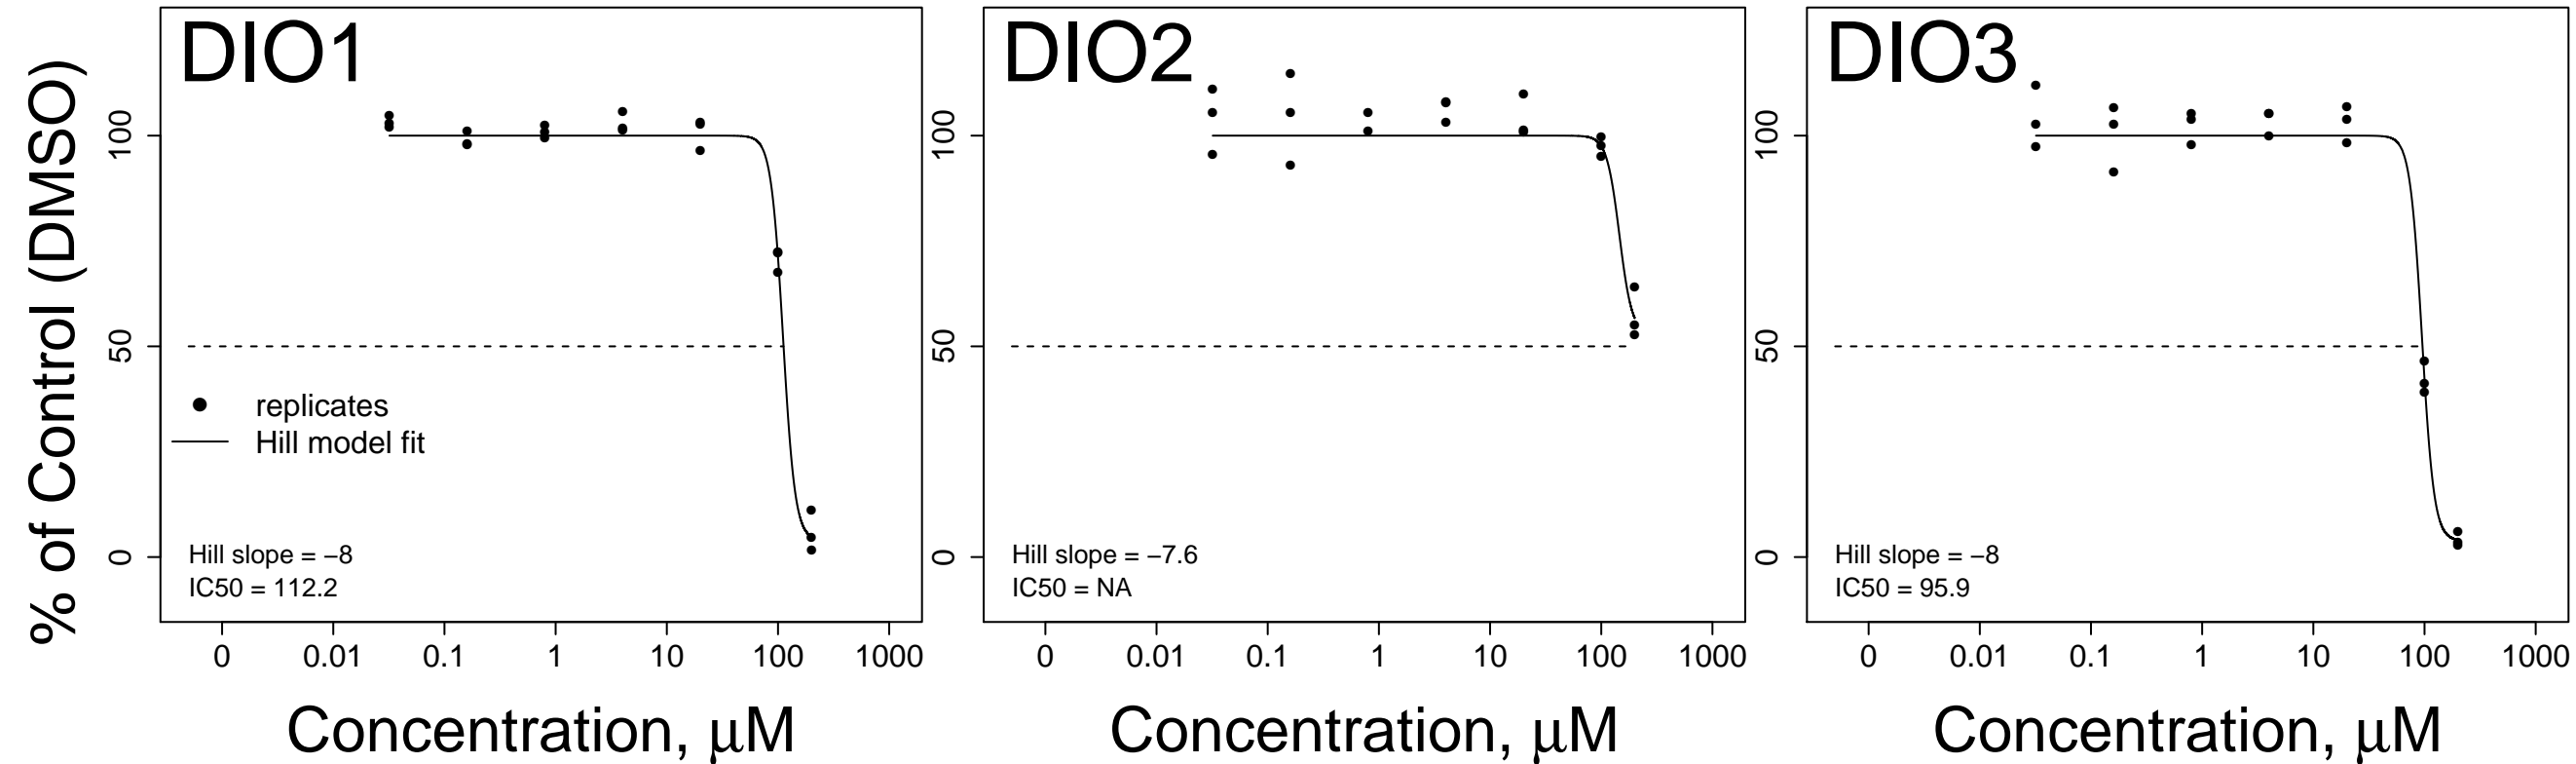



Isoeugenol CASRN: 97-54-1

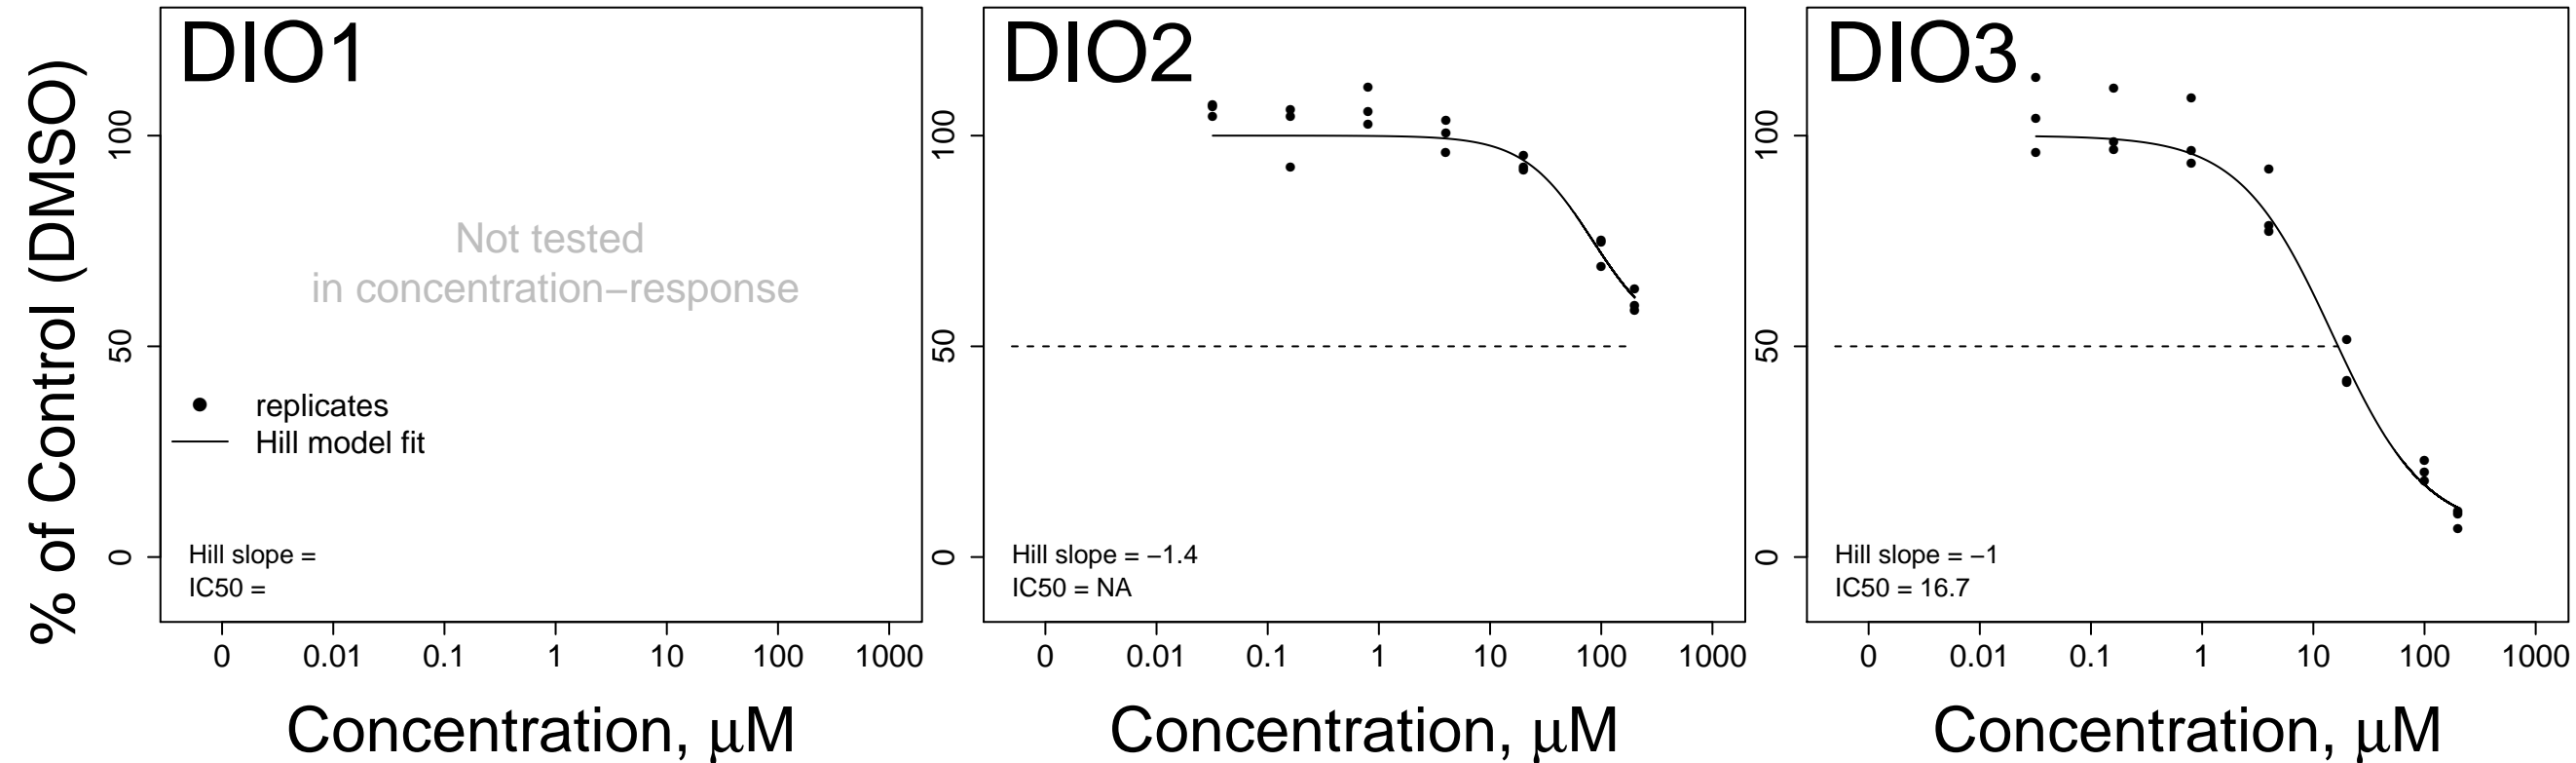

Troglitazone CASRN: 97322-87-7

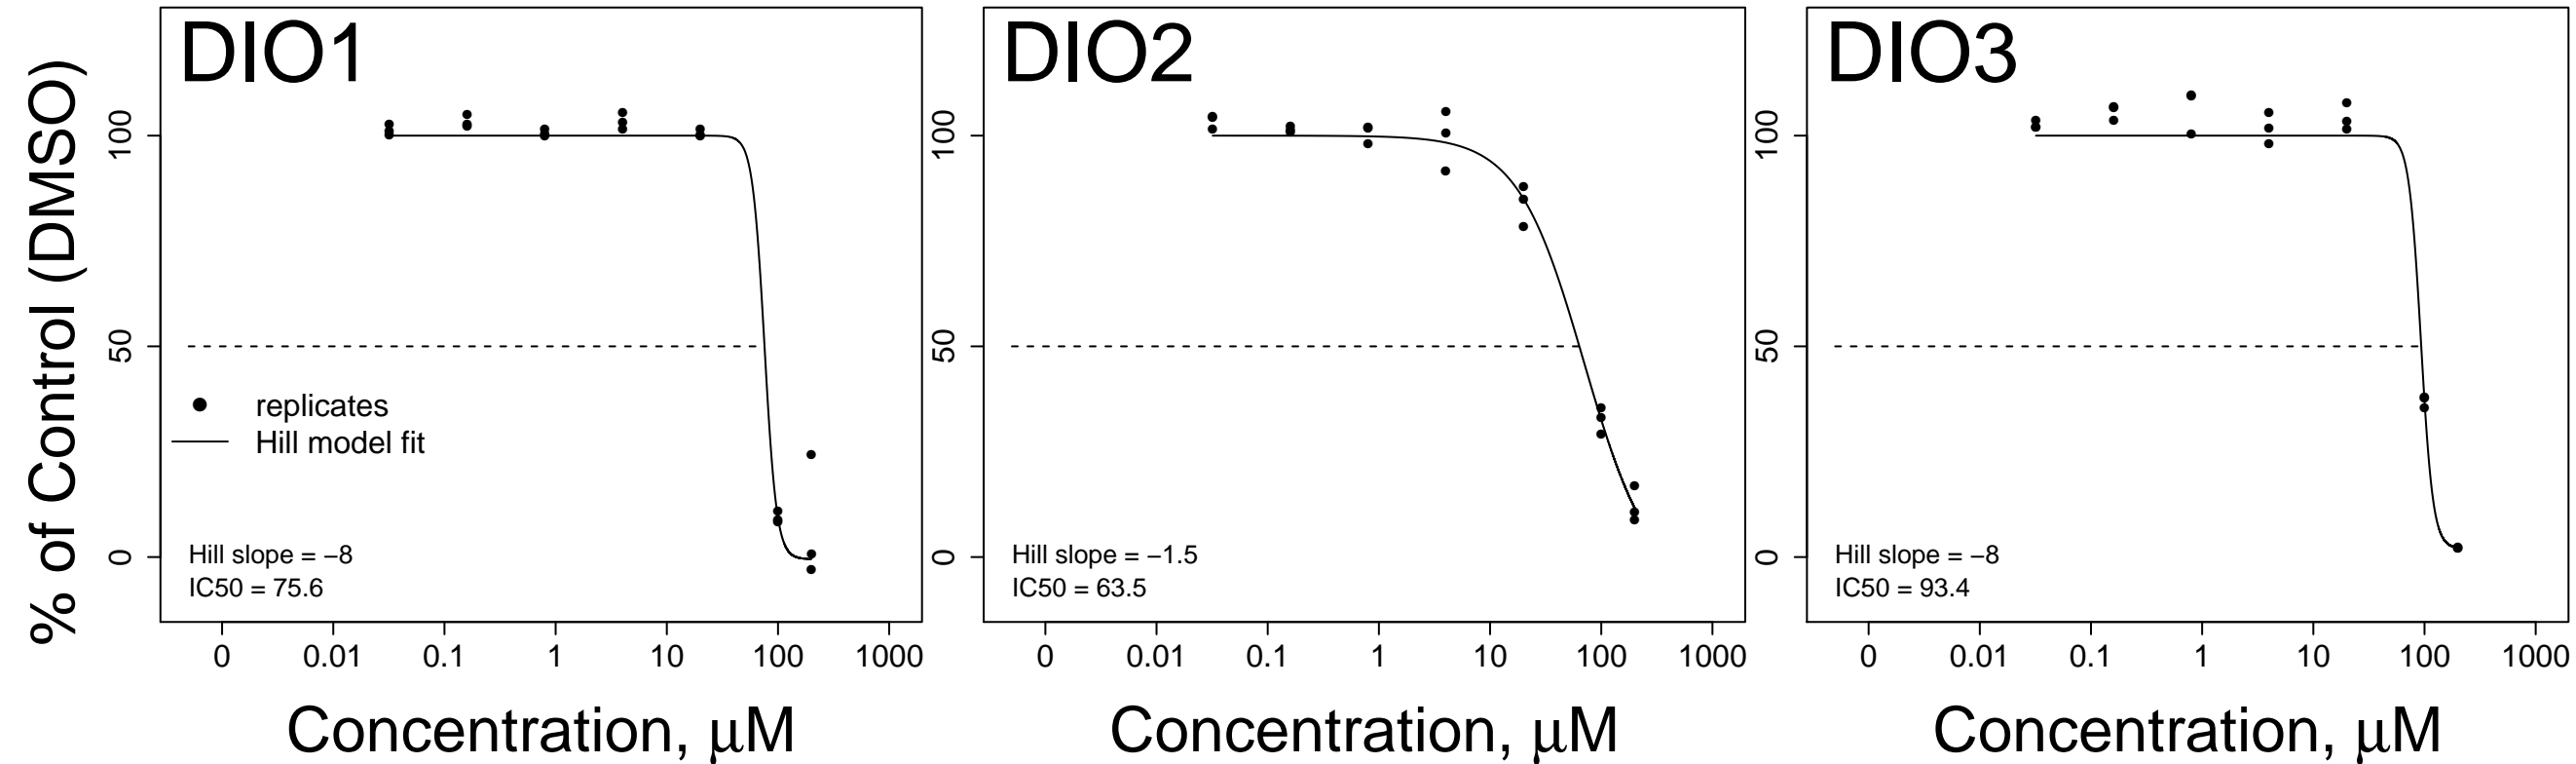

# MK-274 CASRN: NOCAS\_47328

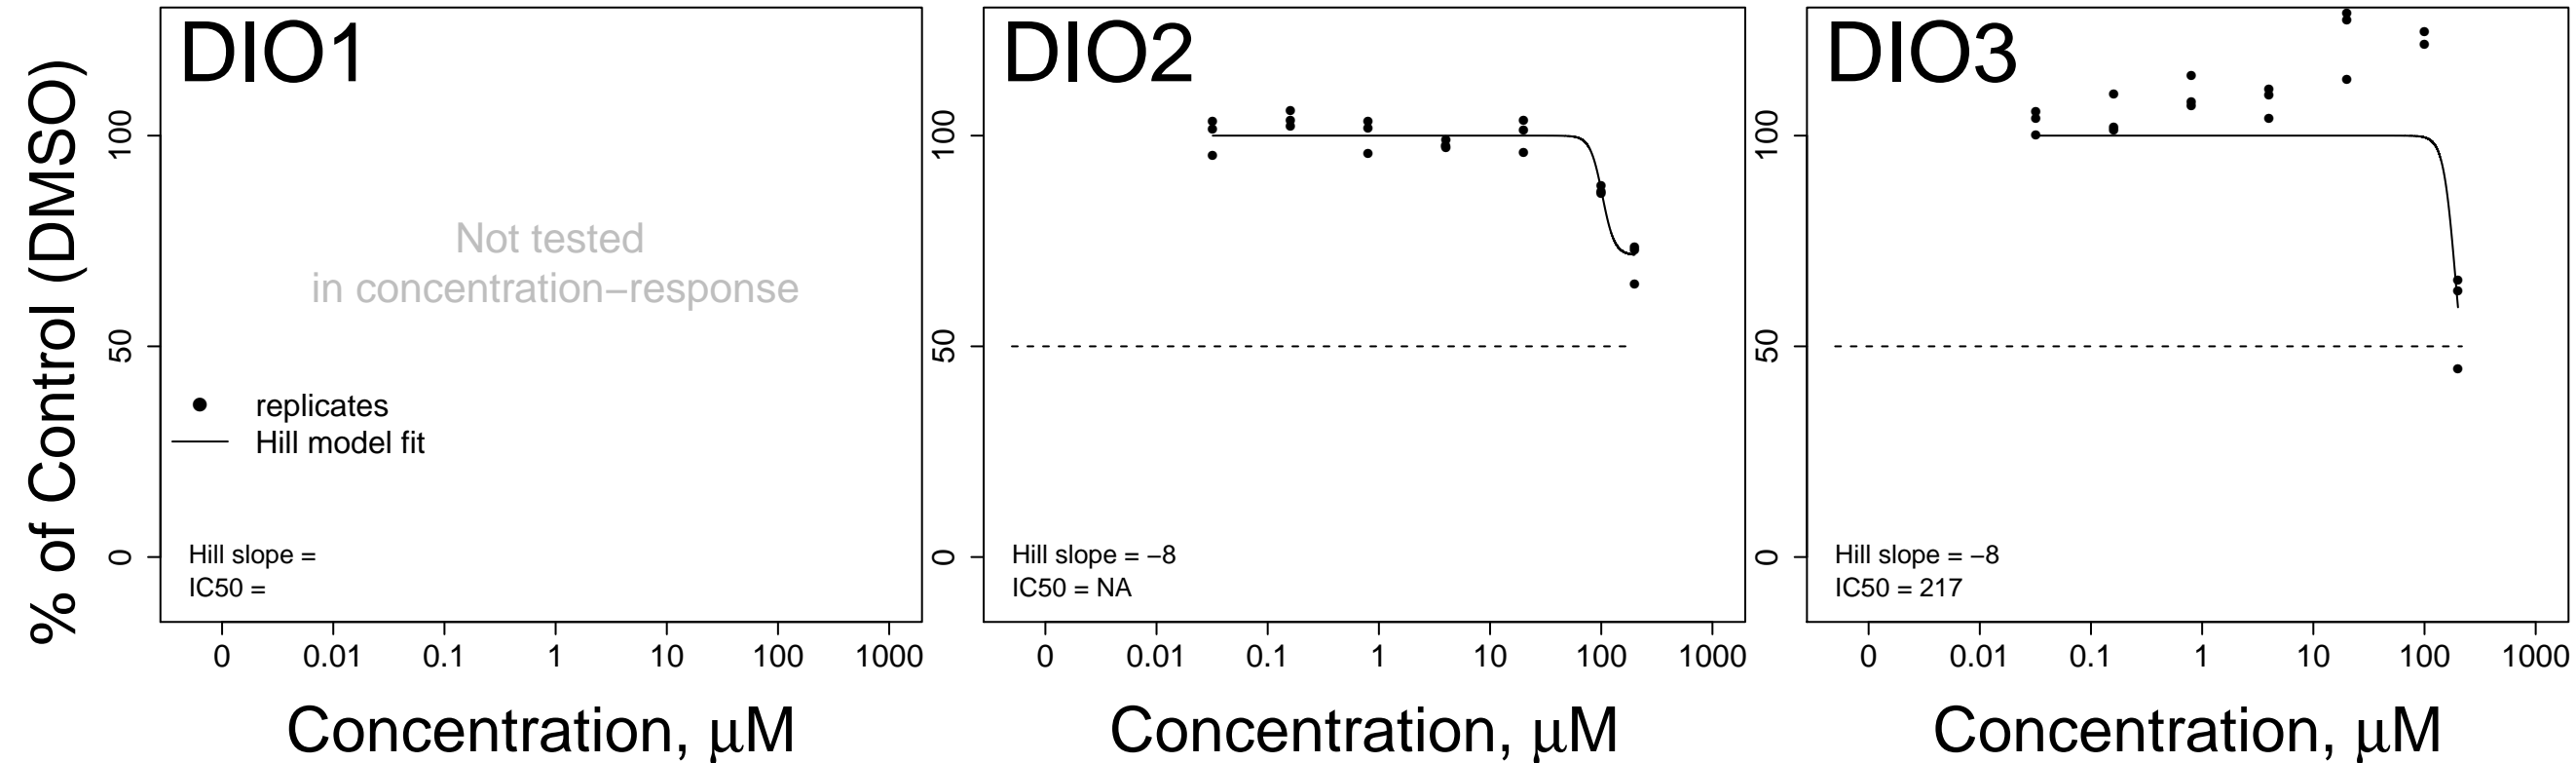

SR125047 CASRN: NOCAS\_47342

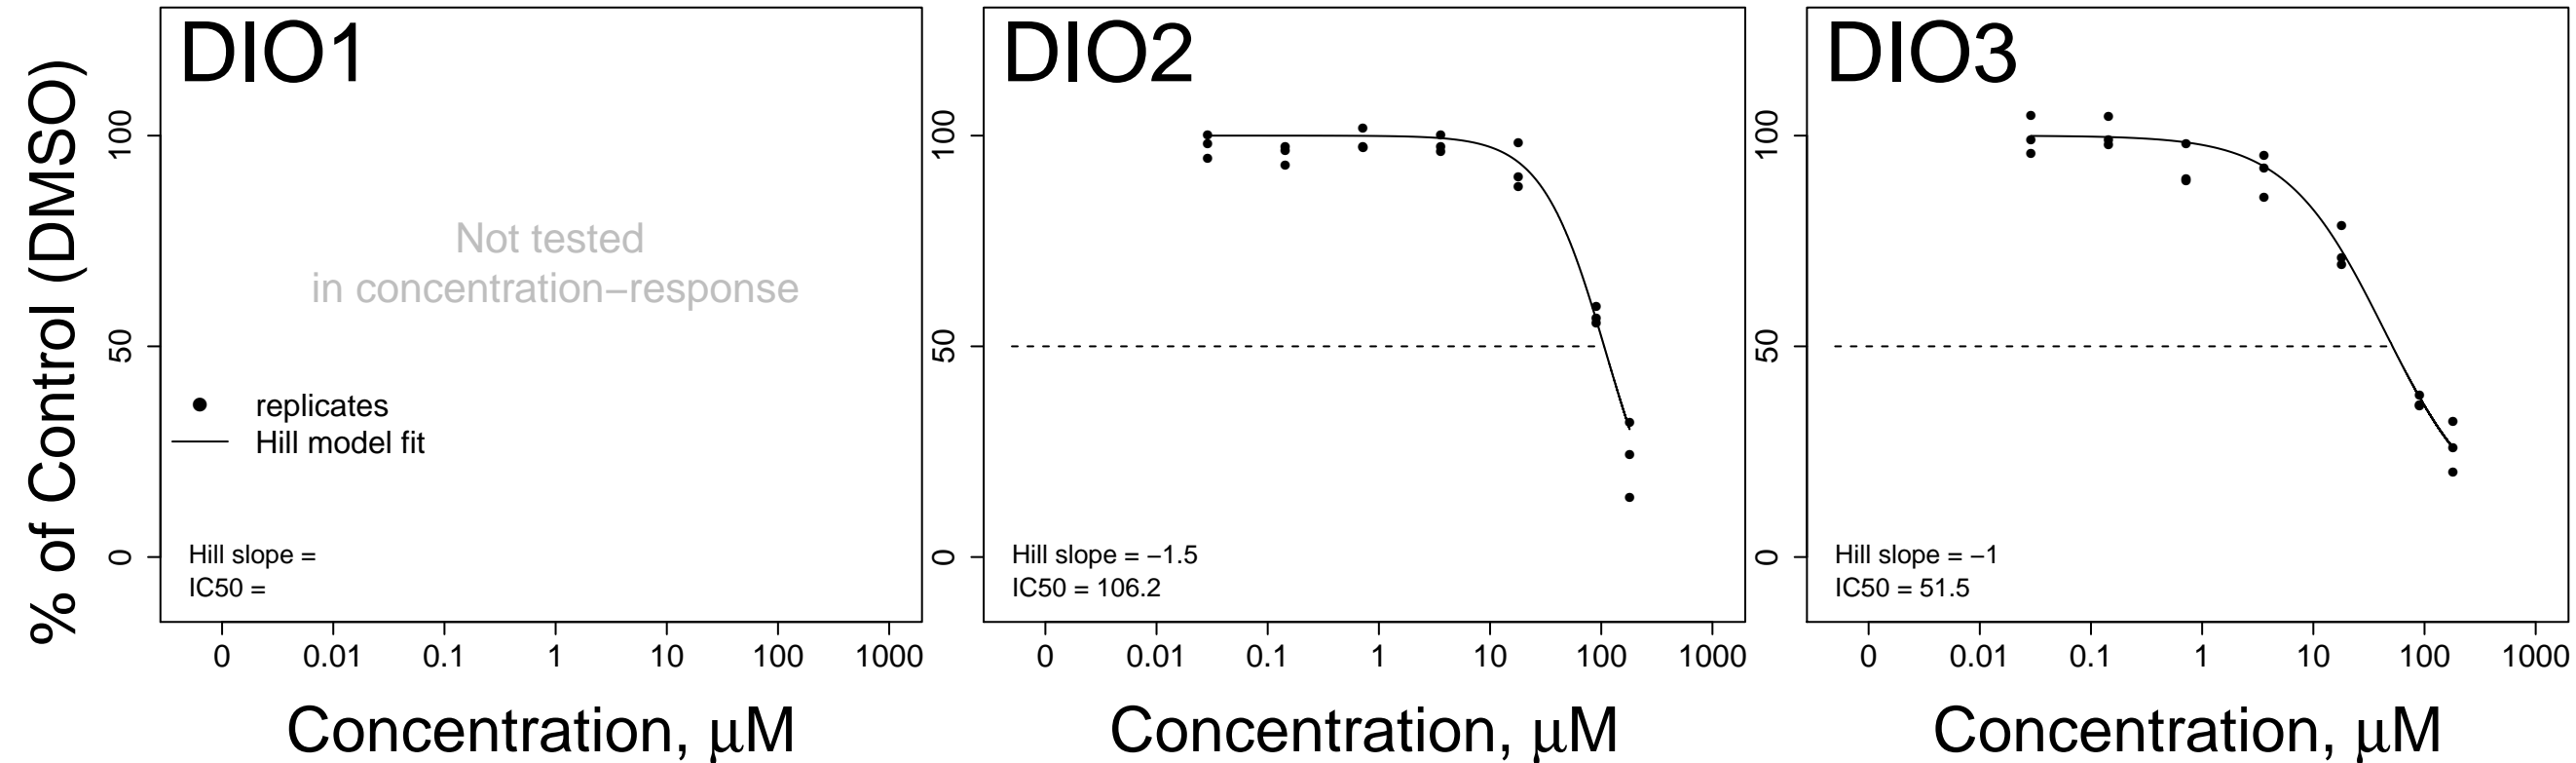

SSR 241586 HCI CASRN: NOCAS\_47353

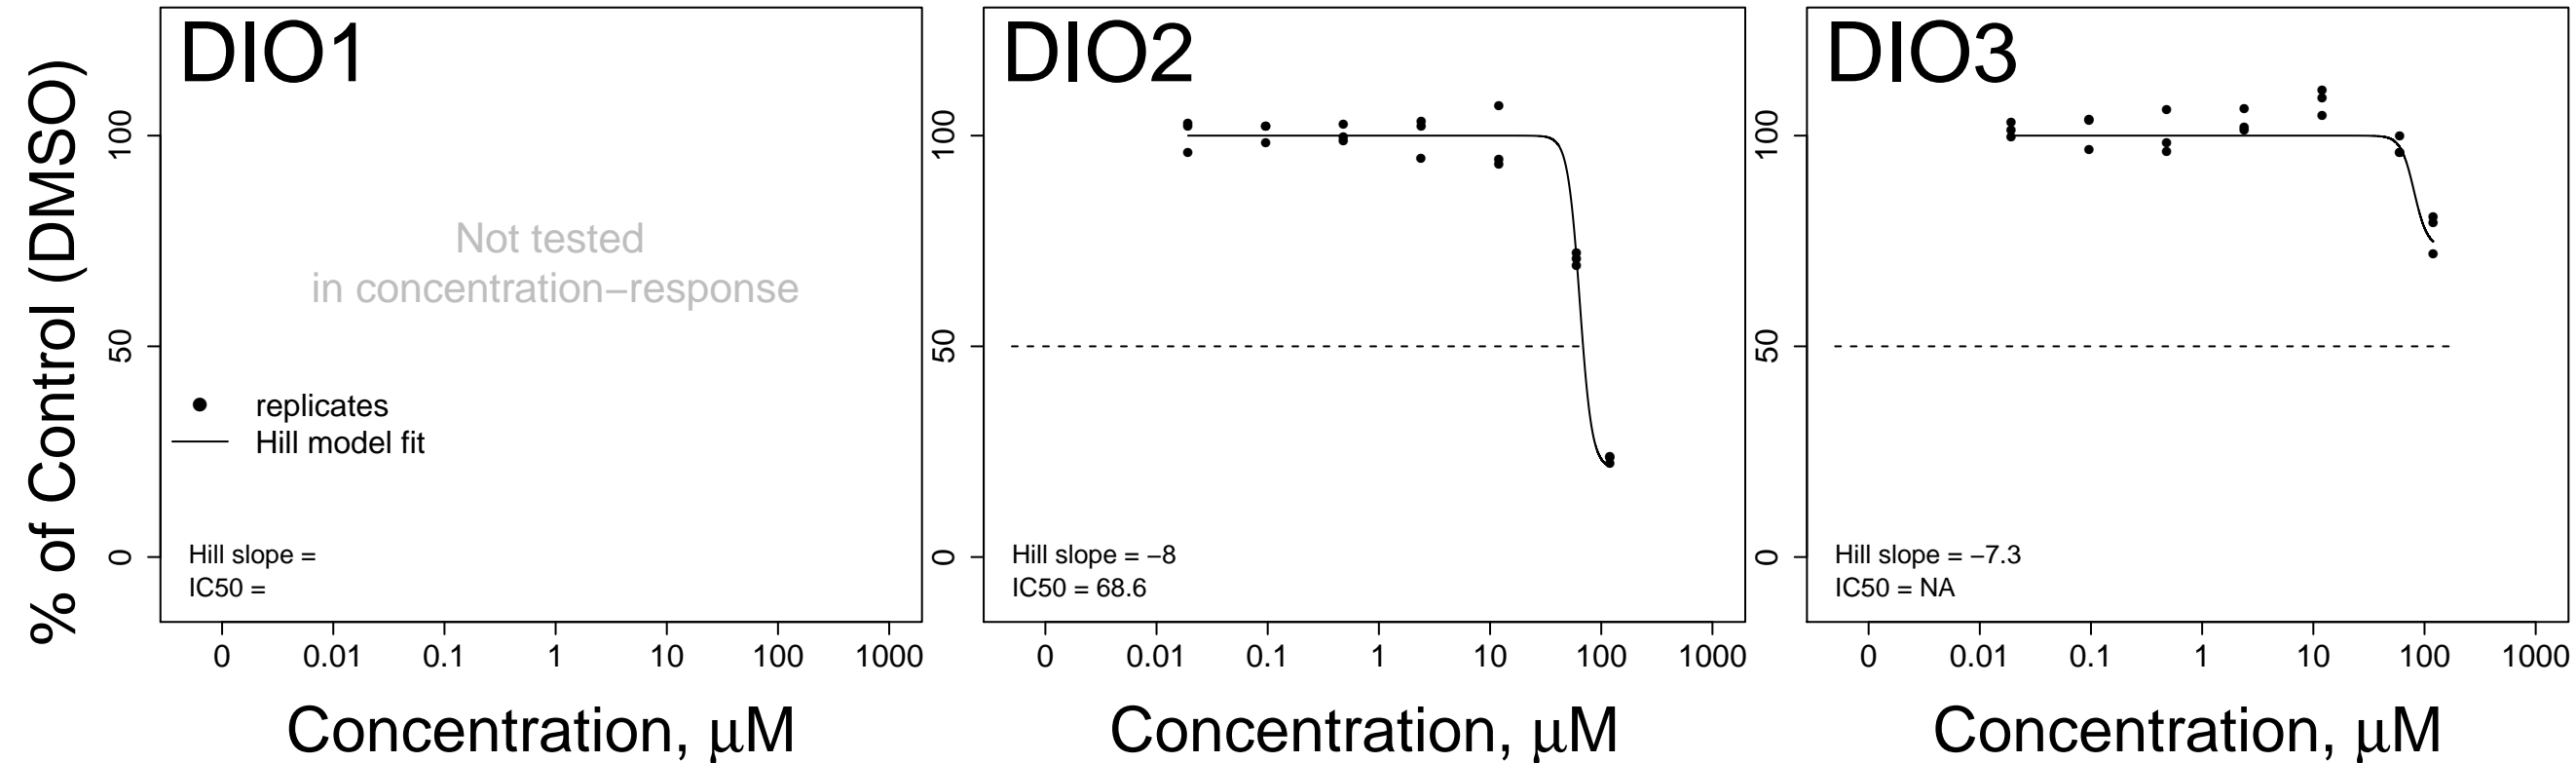

AVE6324 CASRN: NOCAS\_47377

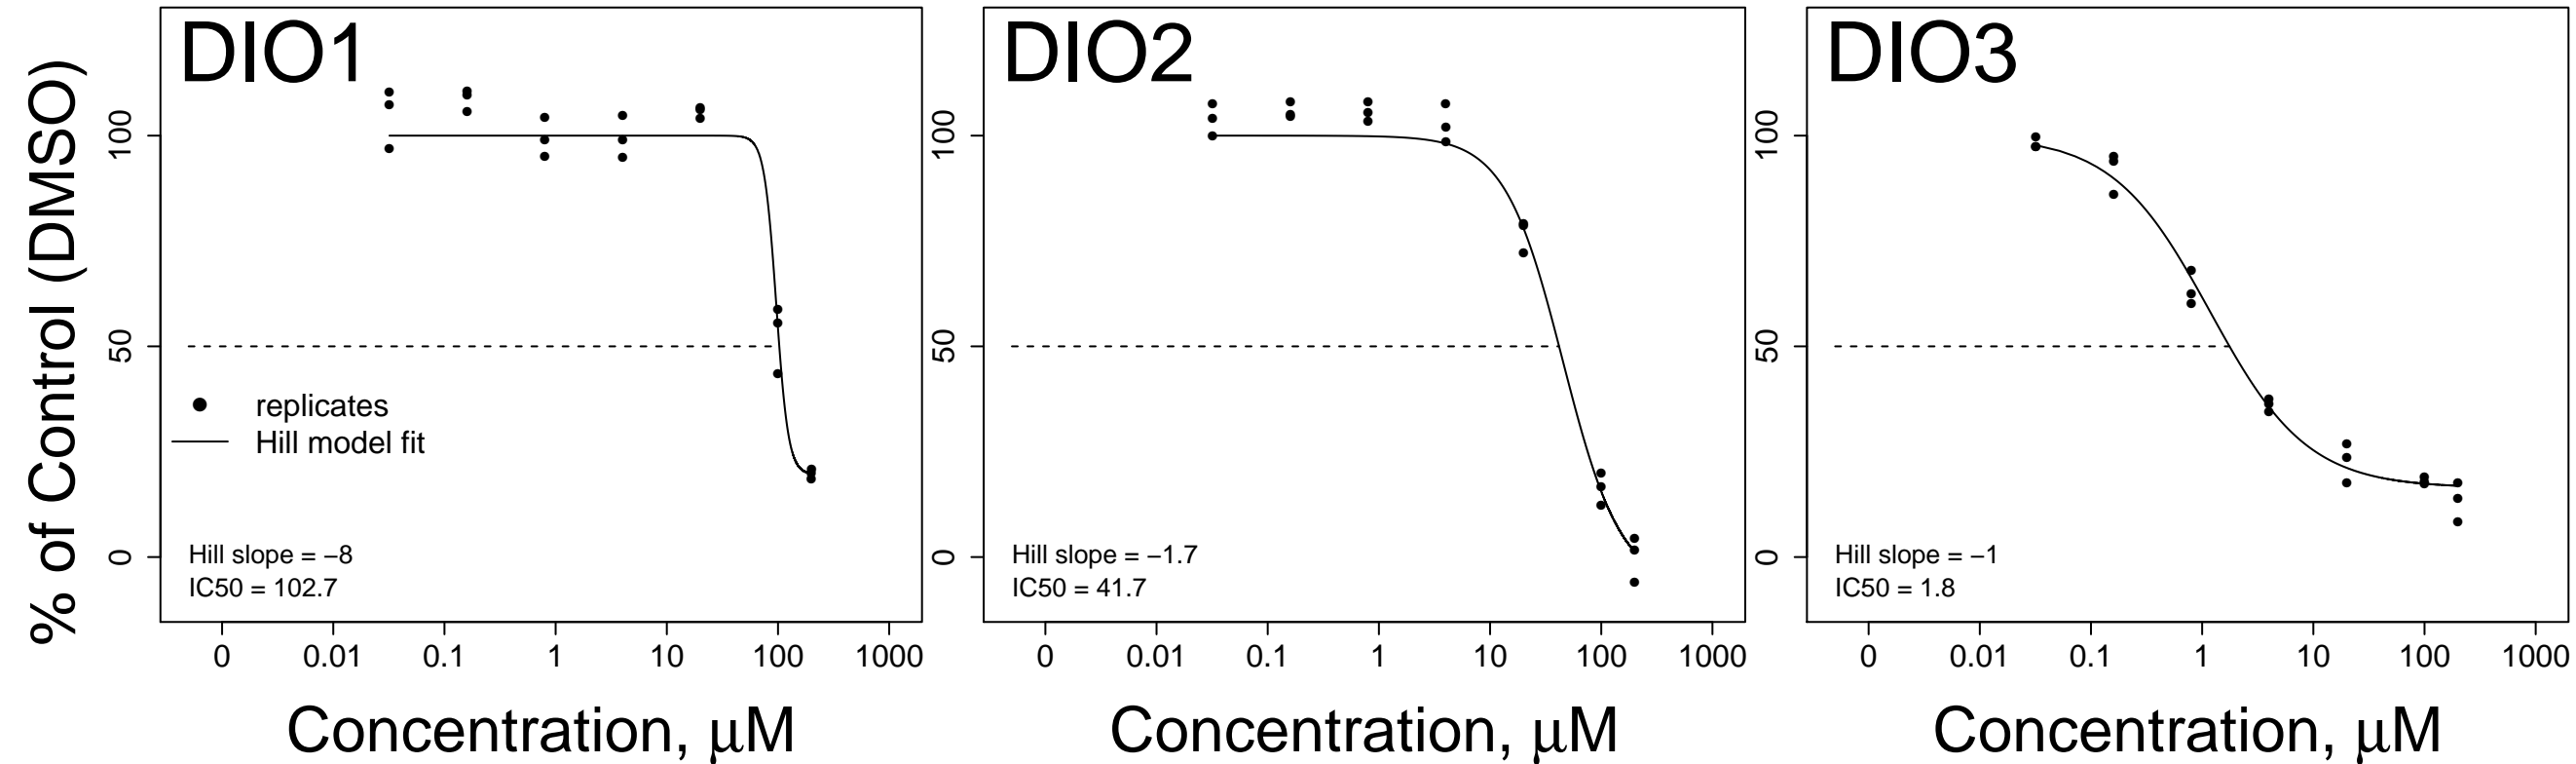

## SAR102779 CASRN: NOCAS\_47387

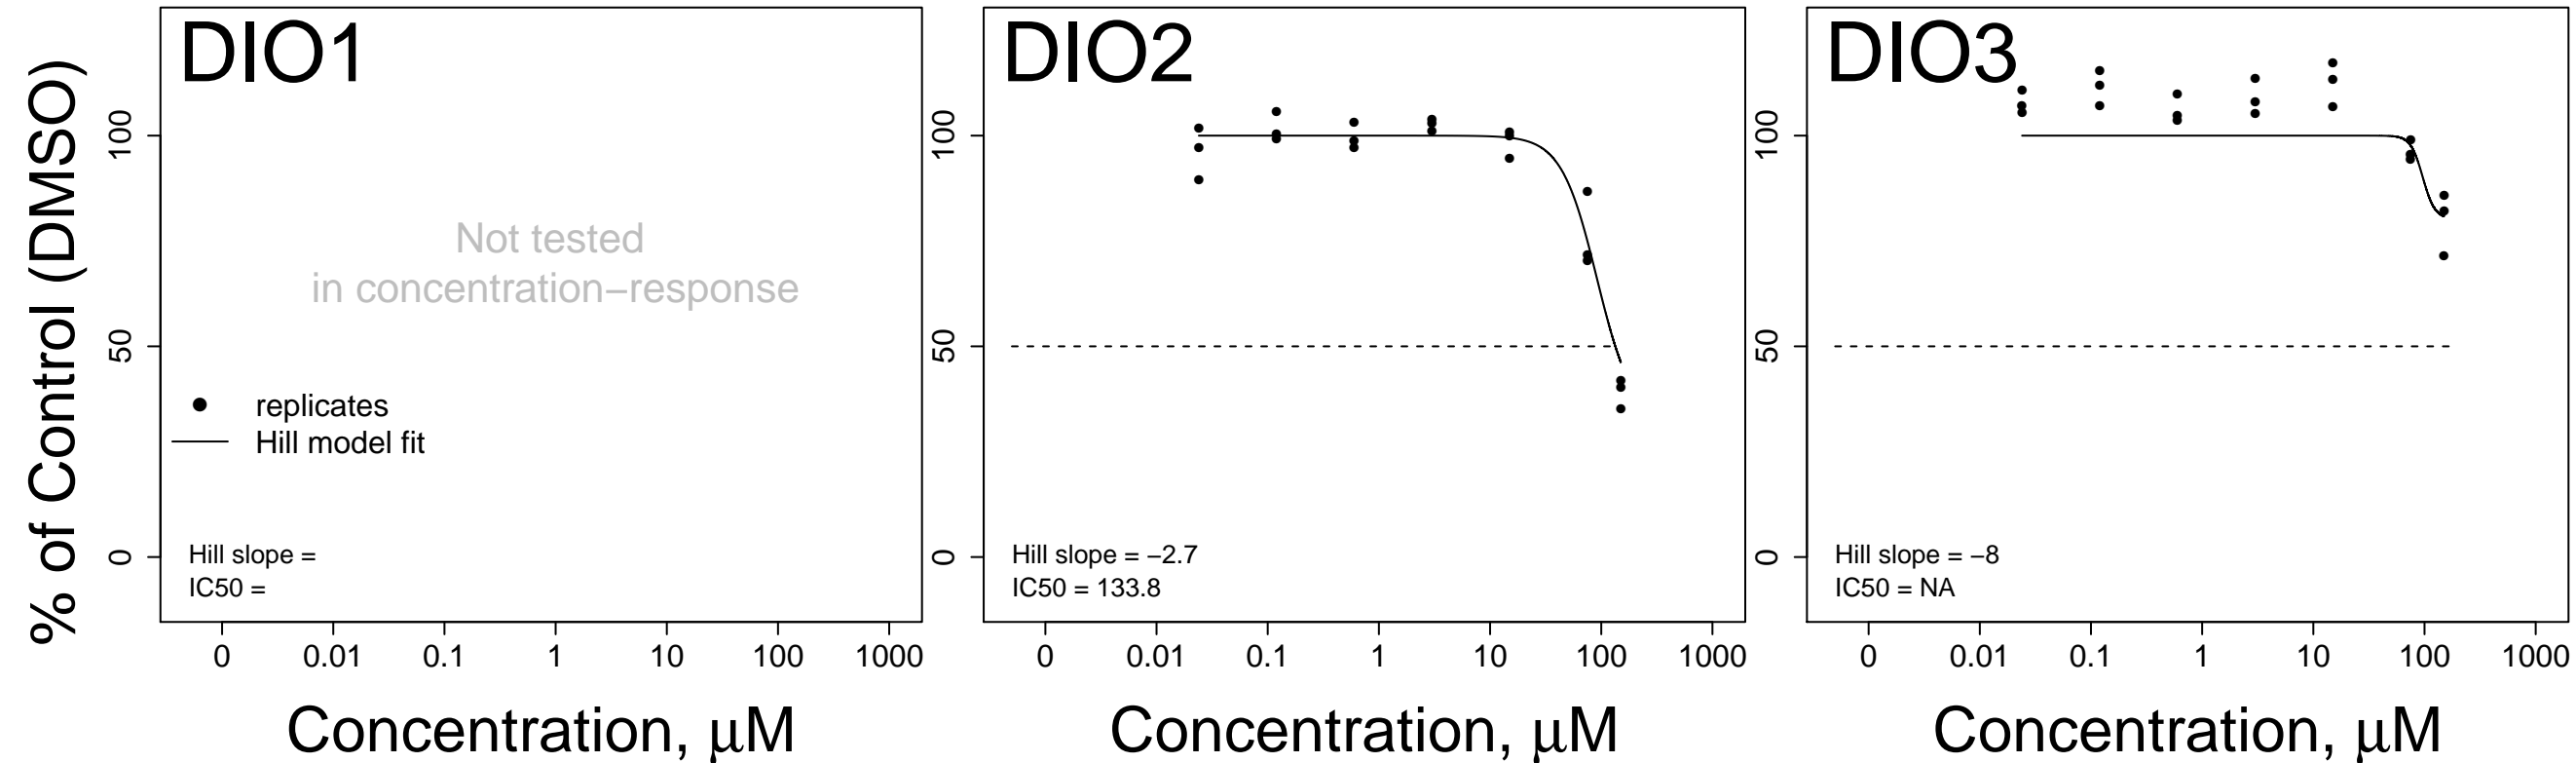

# HMR1171 trifluoroacetate (1:1) CASRN: NOCAS\_48522

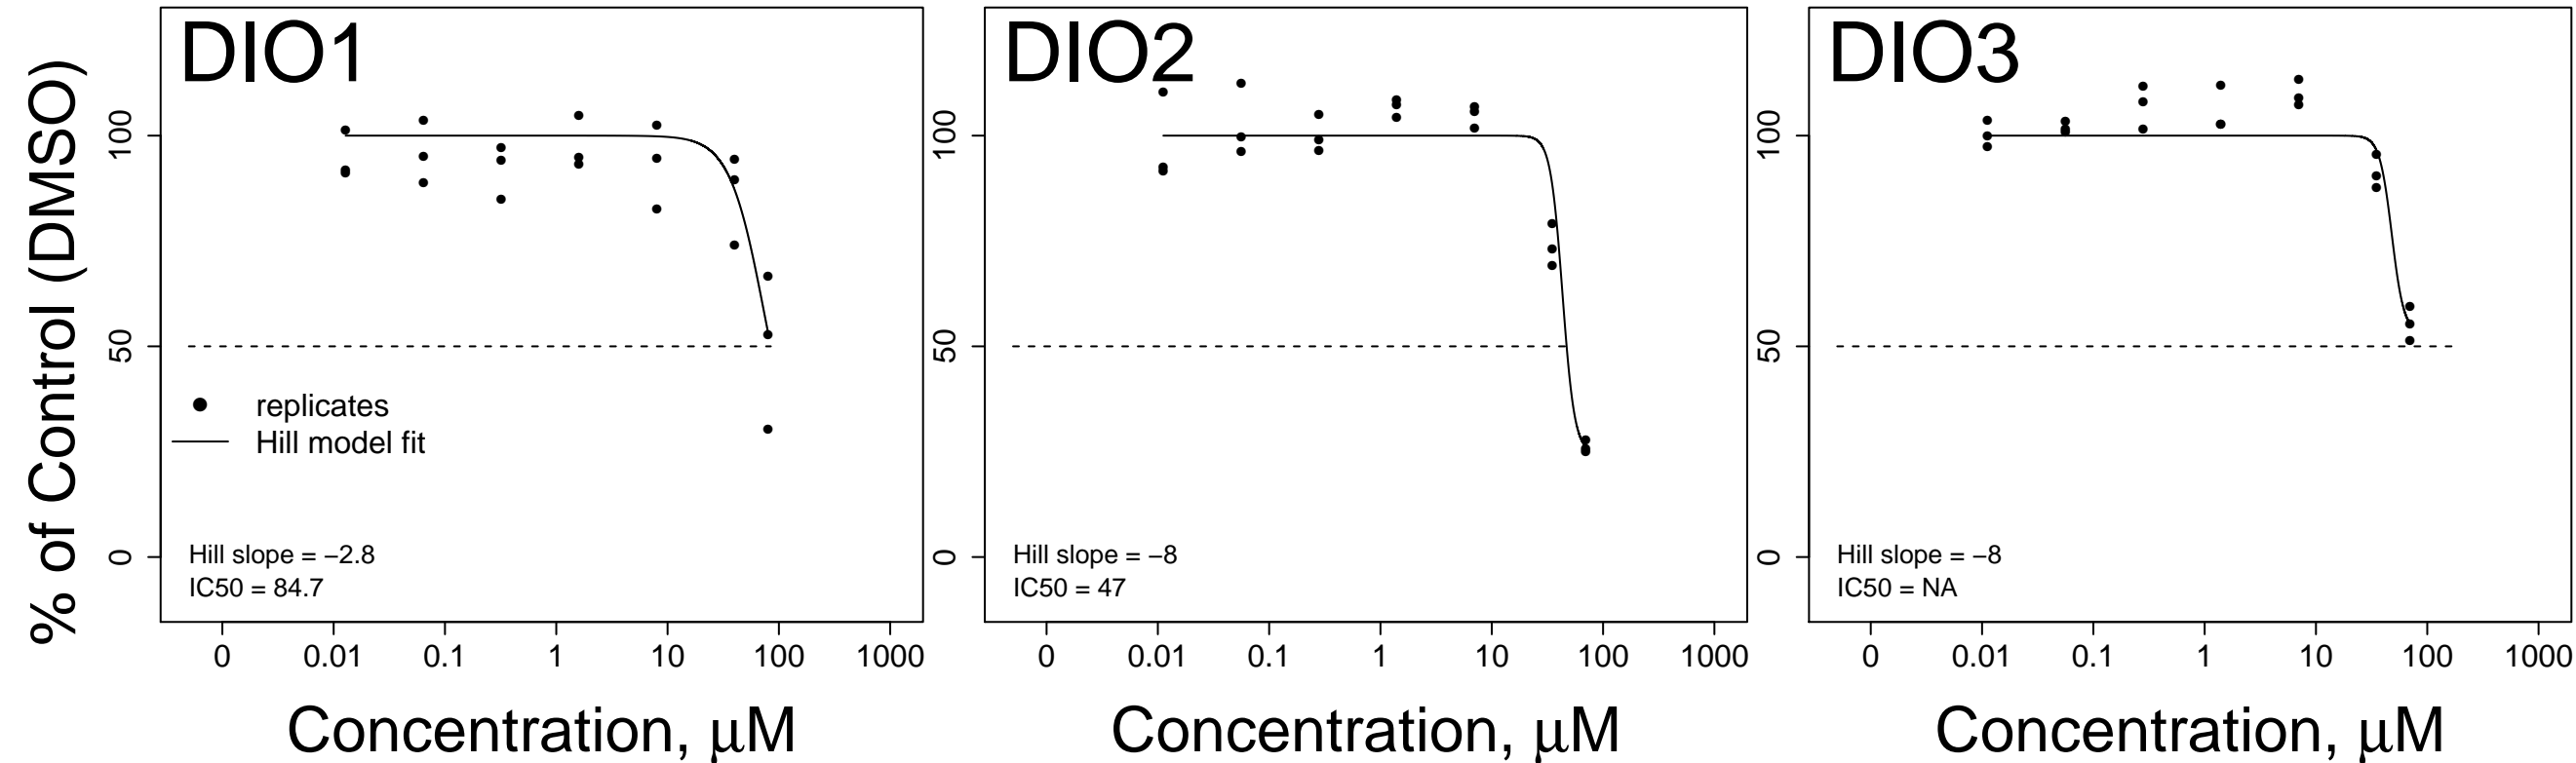



2-Ethylhexyl acrylate CASRN: 103-11-7

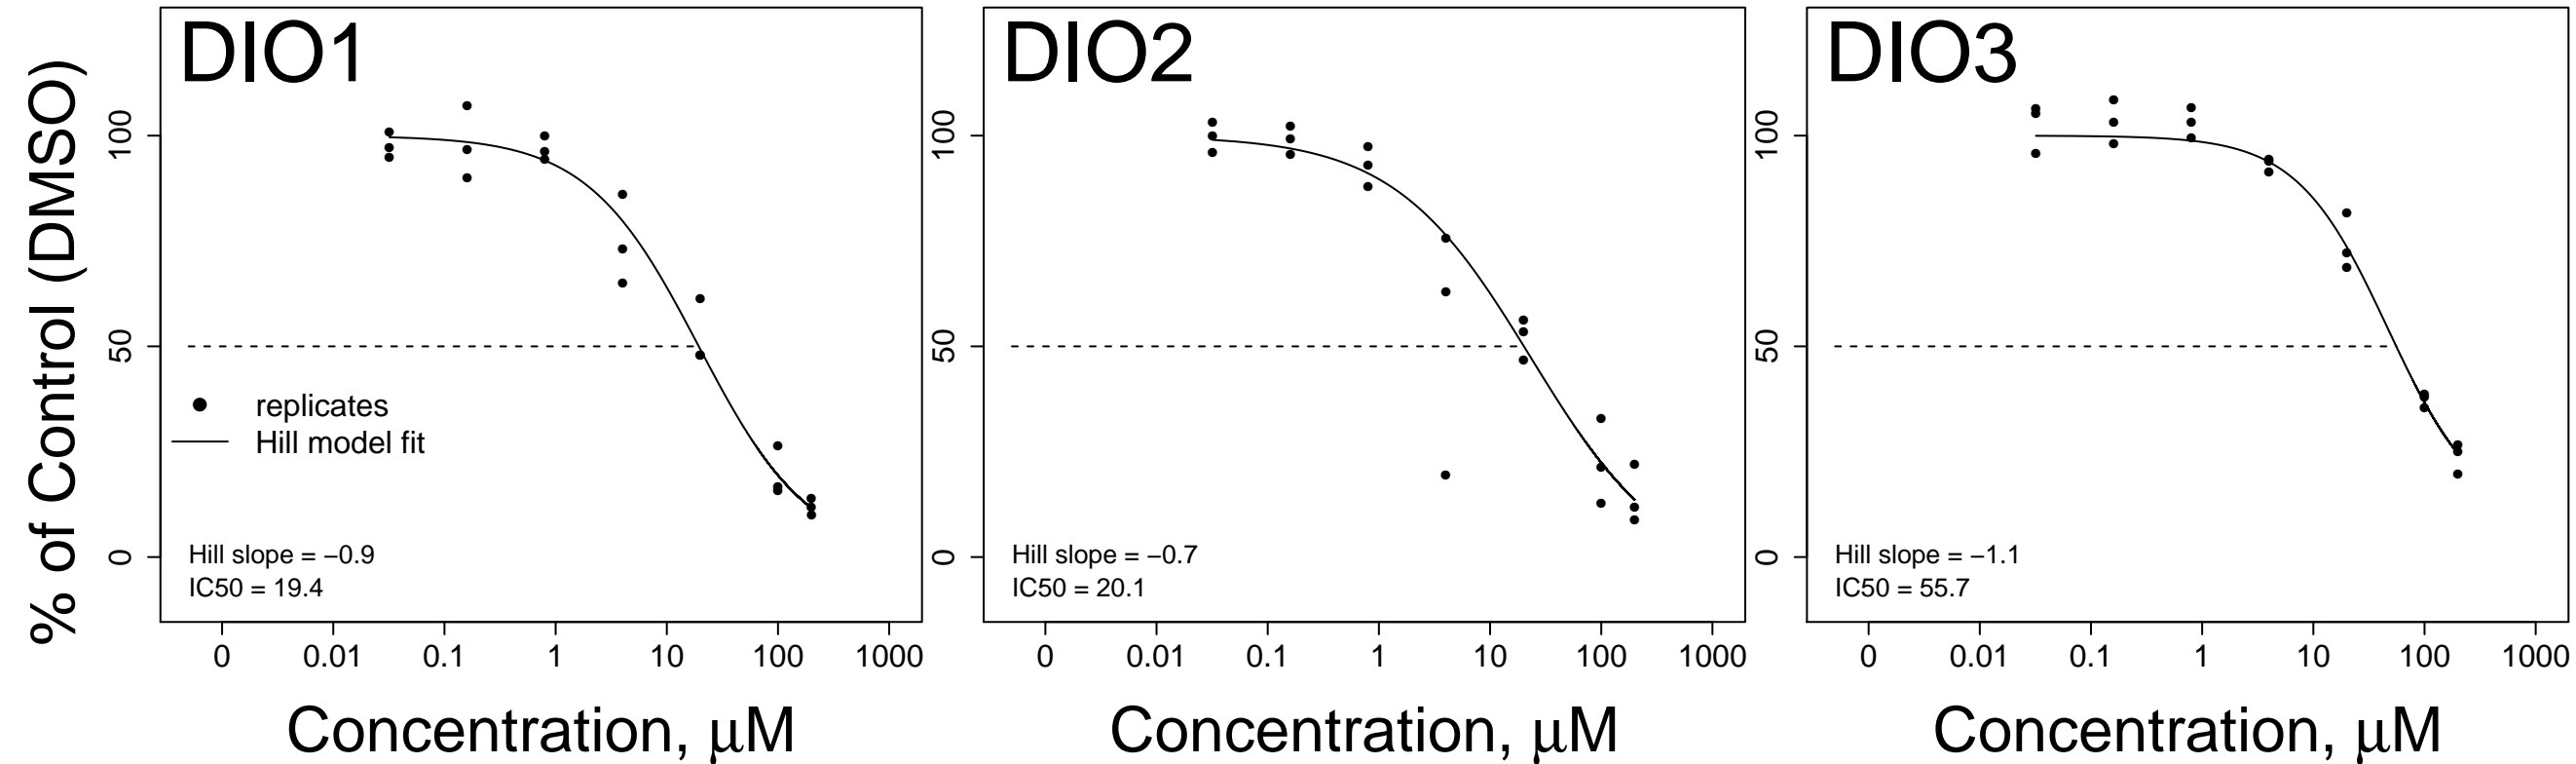

Benzyl cinnamate CASRN: 103-41-3

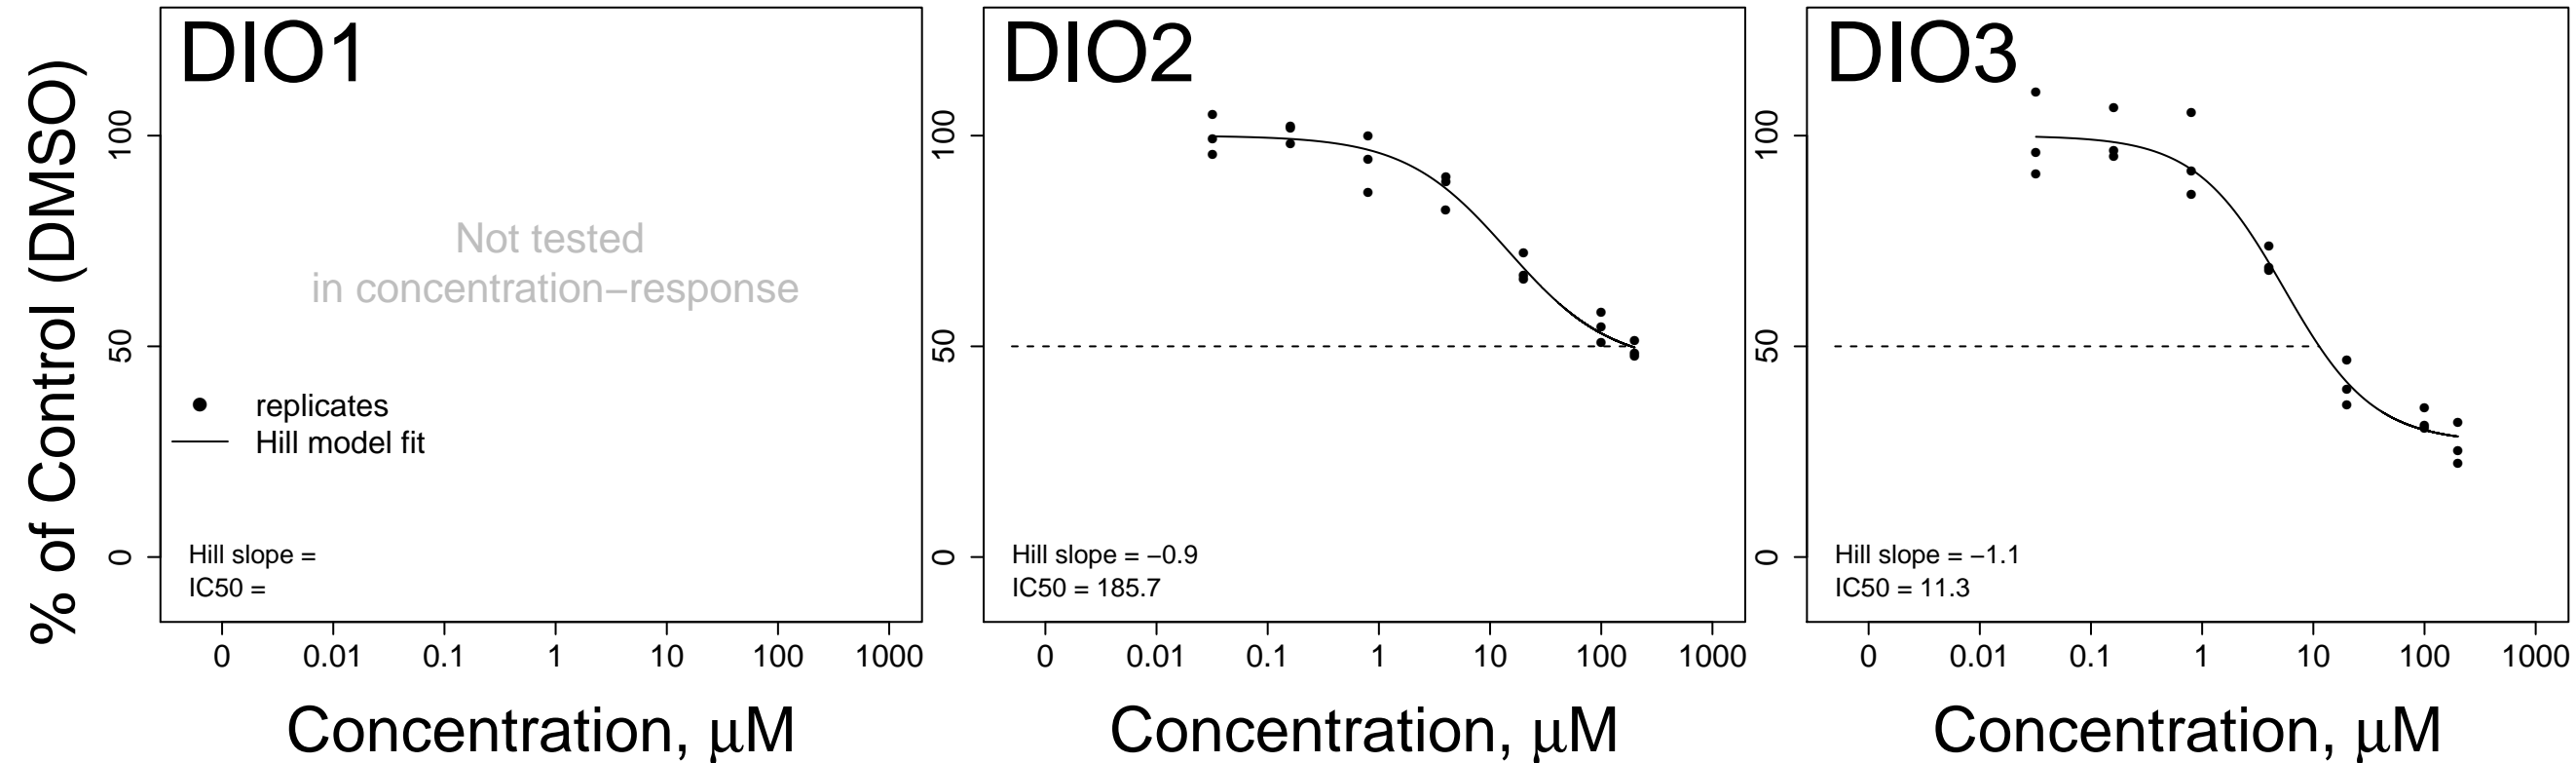

4-Dodecylphenol CASRN: 104-43-8

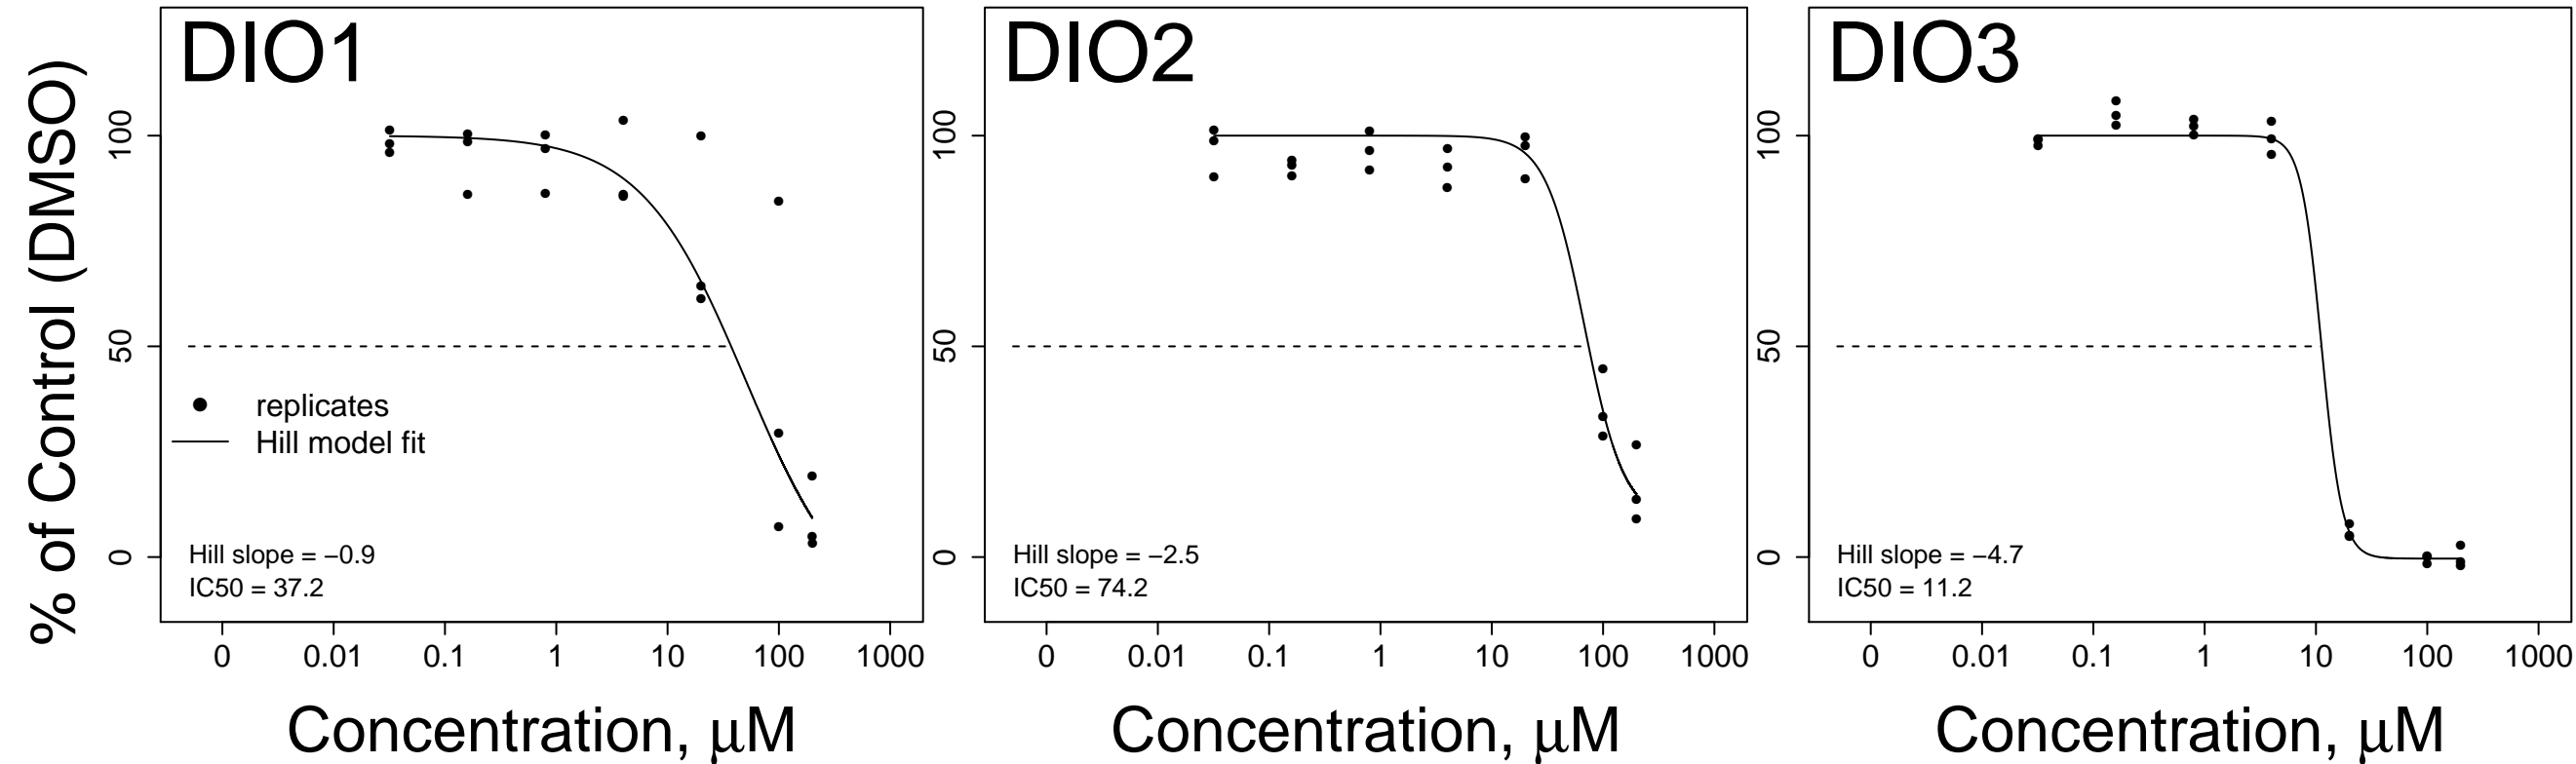

# Heptylparaben CASRN: 1085-12-7

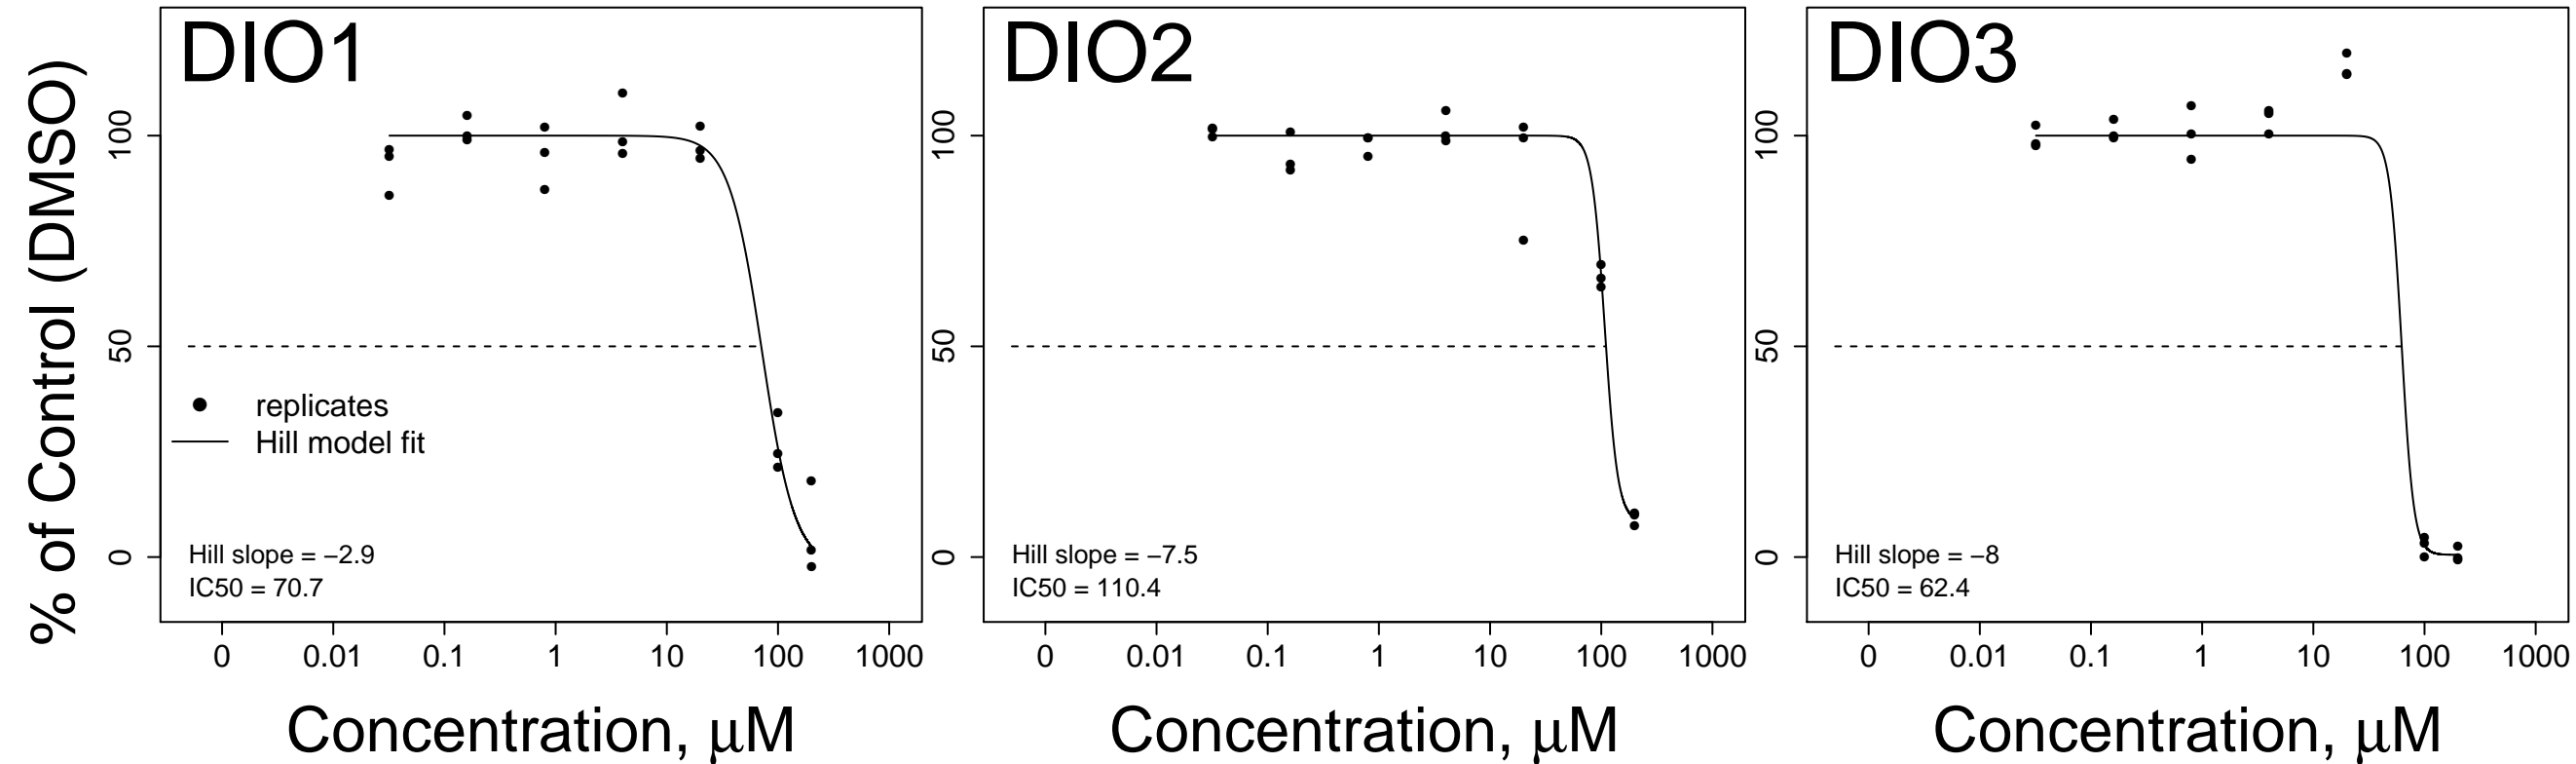

Propanedinitrile CASRN: 109-77-3

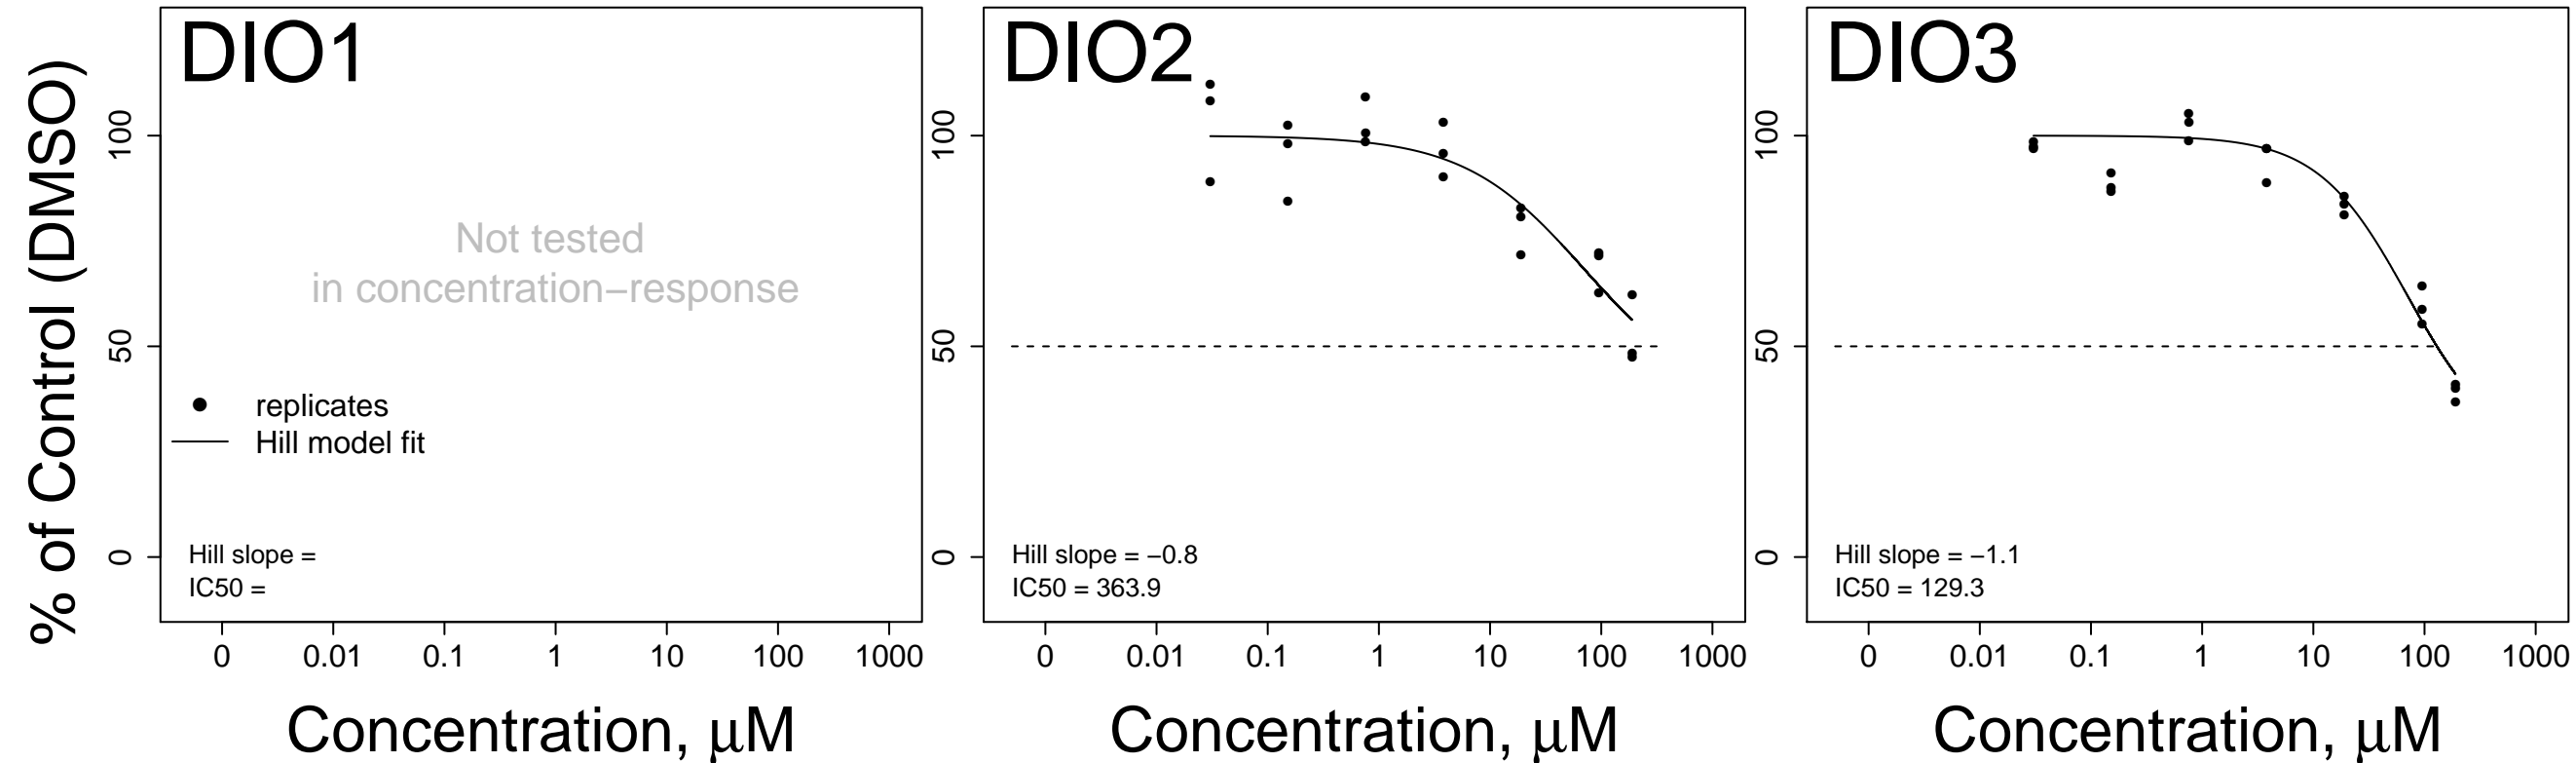

# Oleyl sarcosine CASRN: 110-25-8

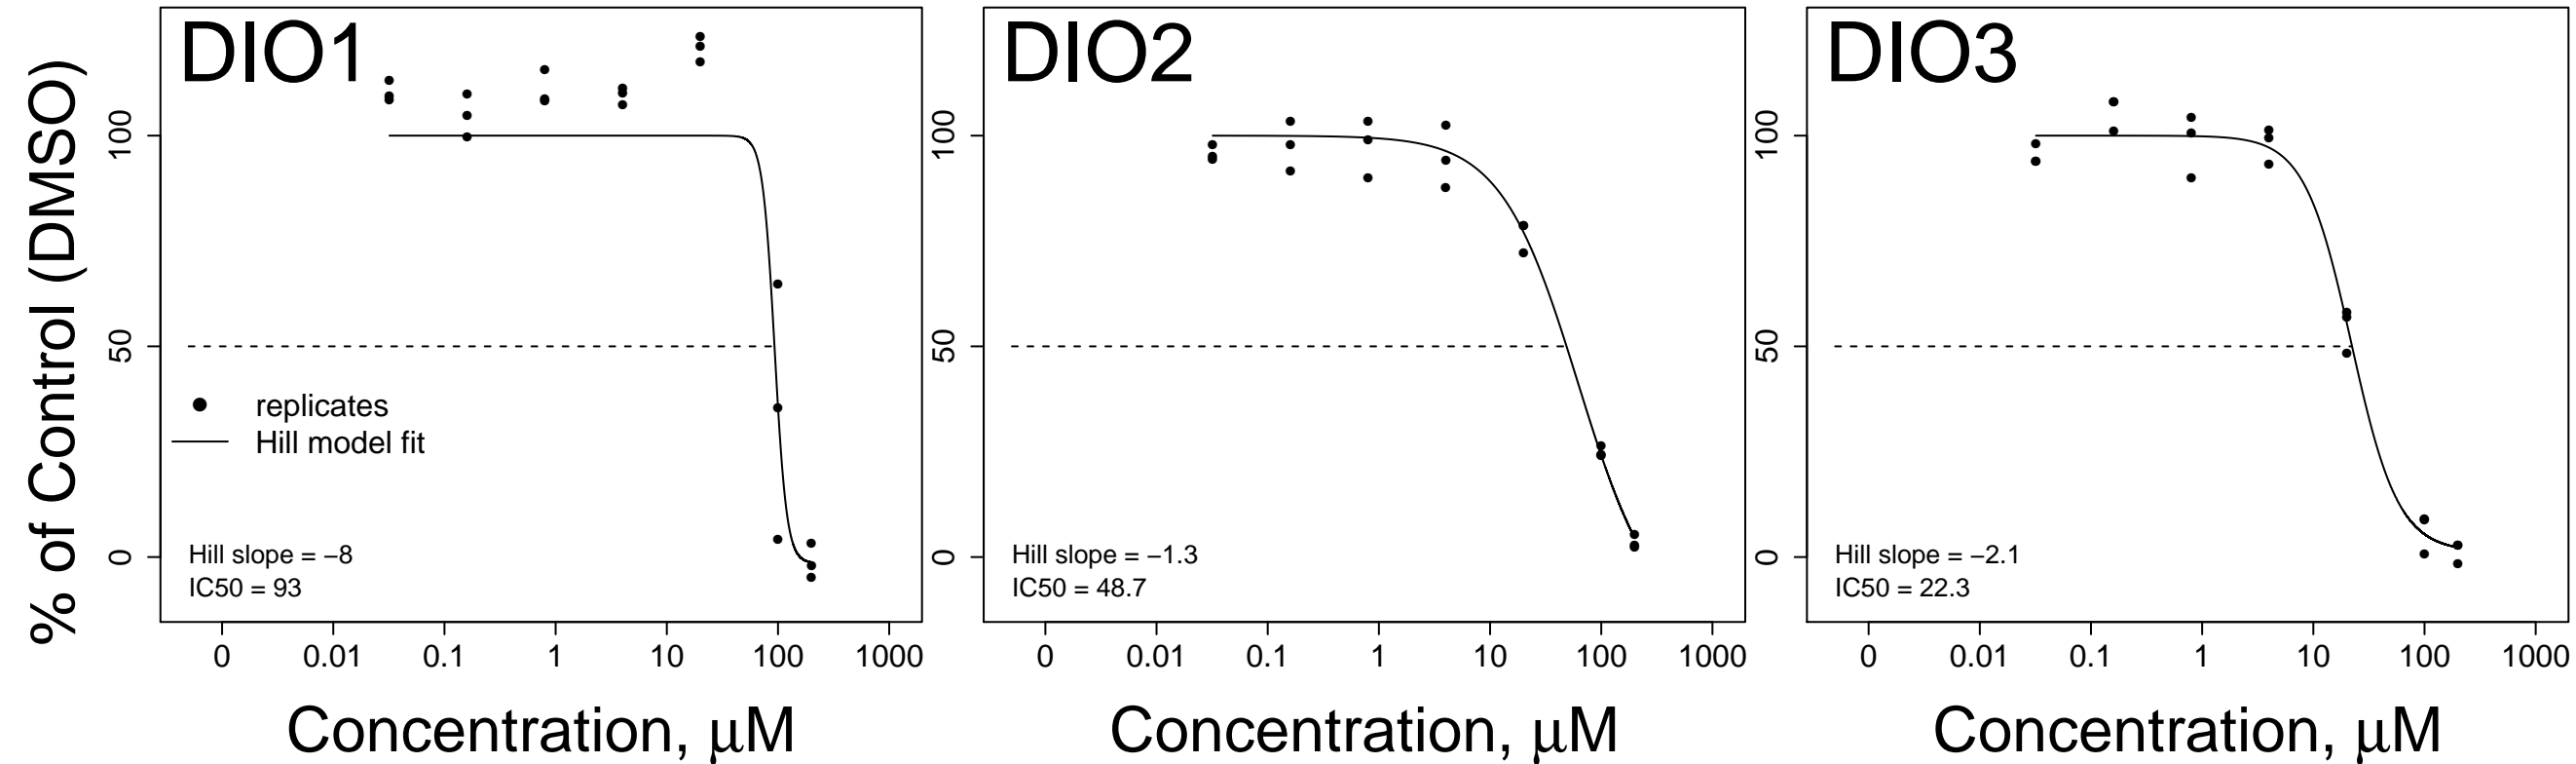

Methyl linoleate CASRN: 112-63-0

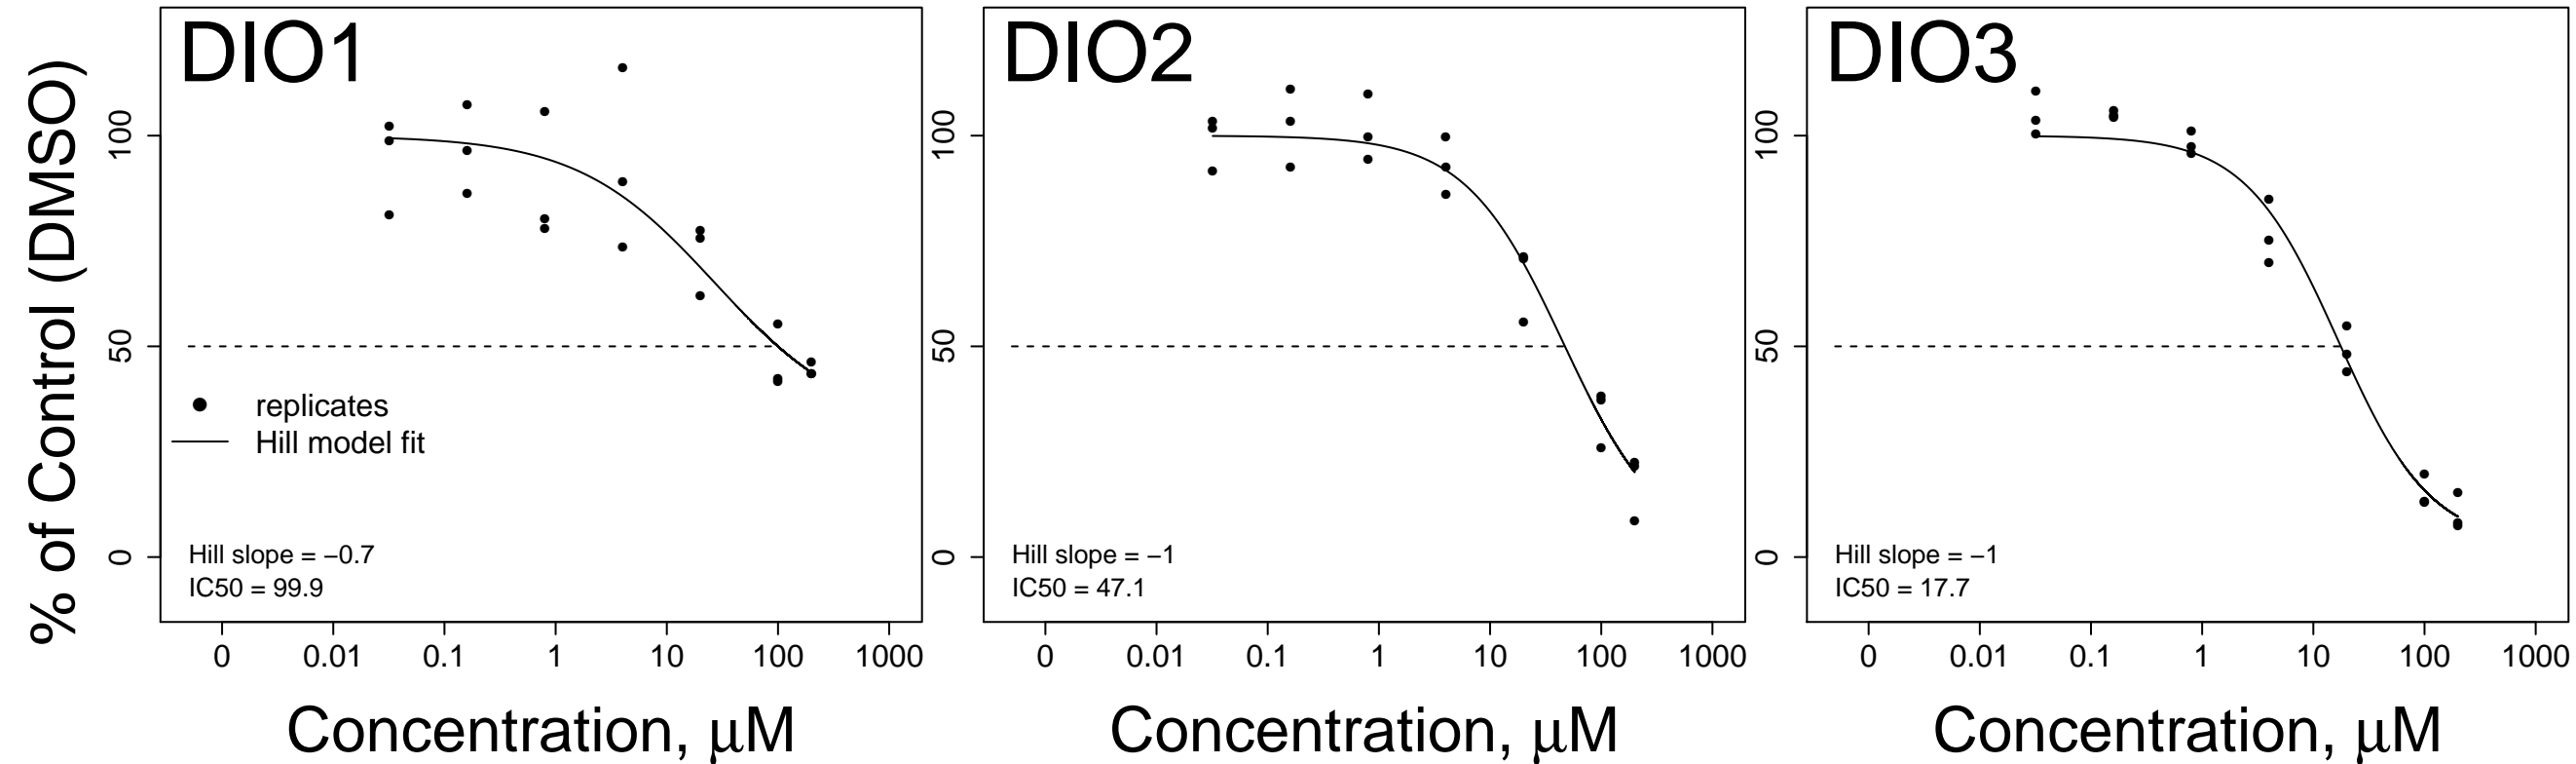

Oleic acid CASRN: 112-80-1

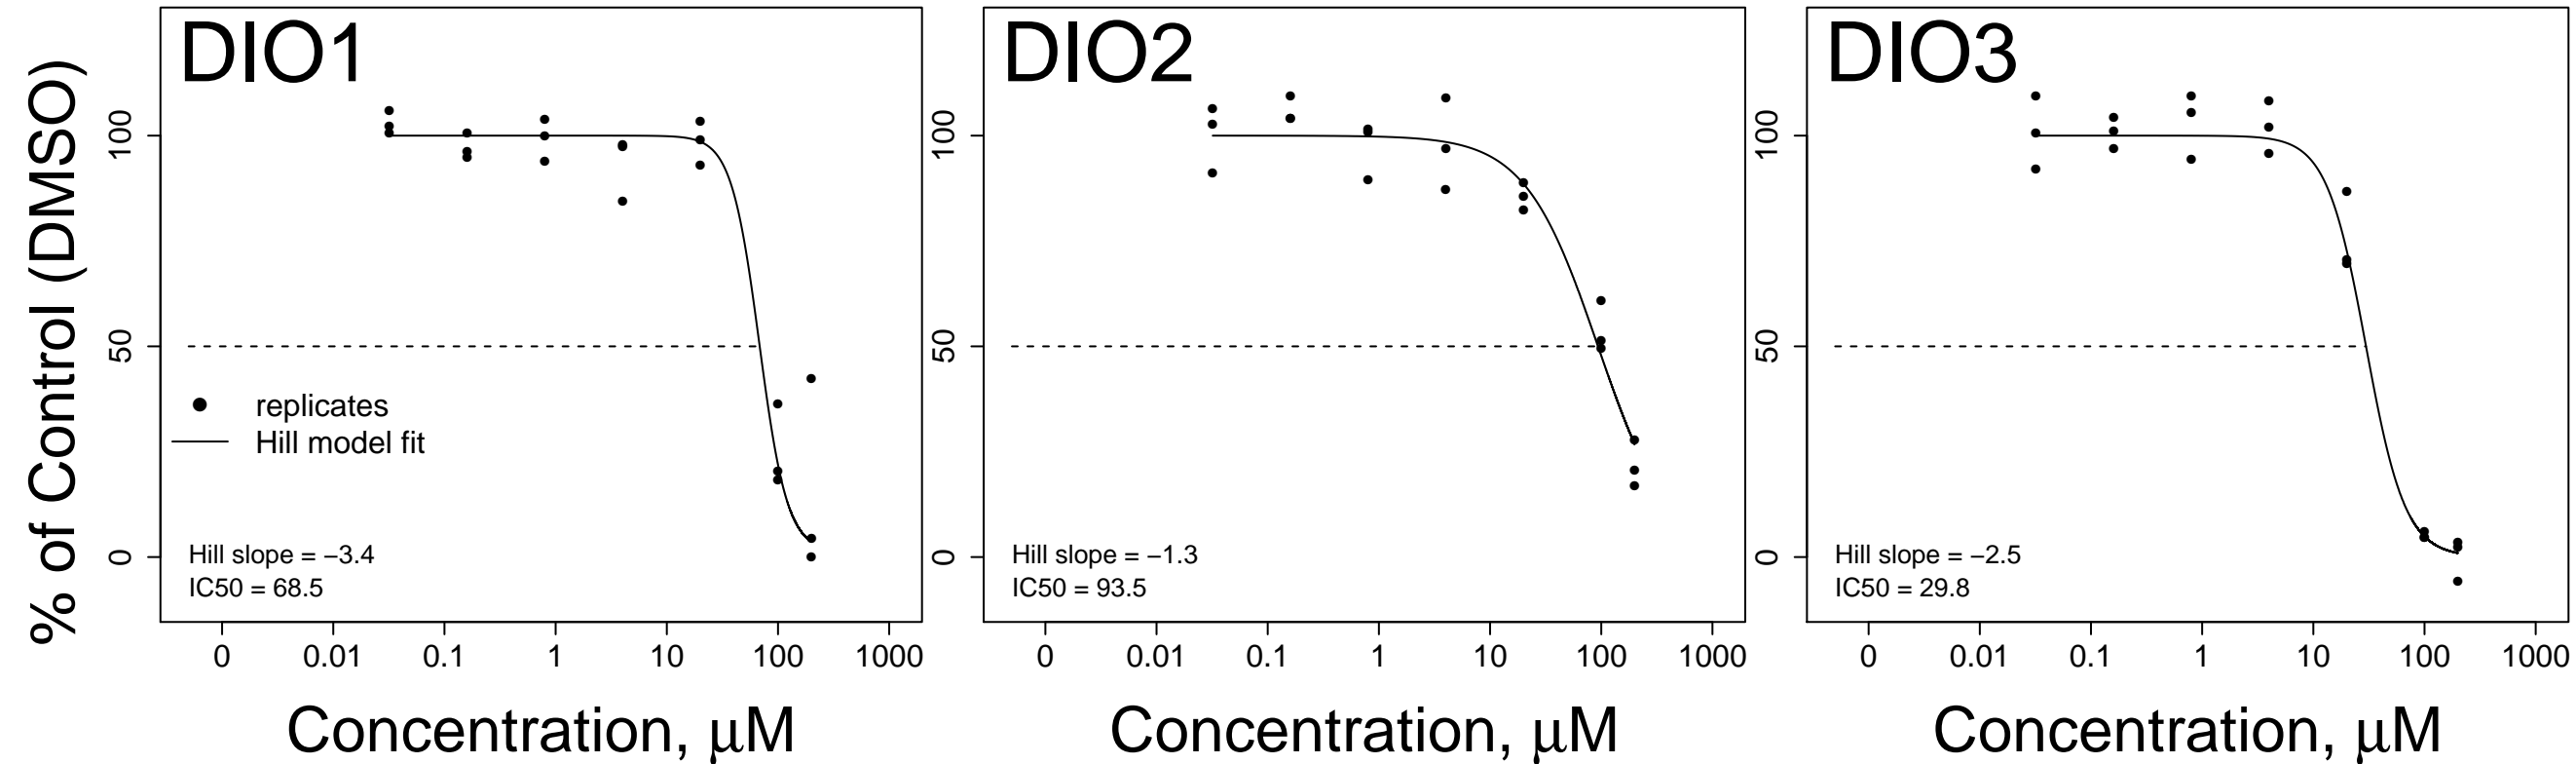



Octadecyl sulfate sodium salt CASRN: 1120-04-3

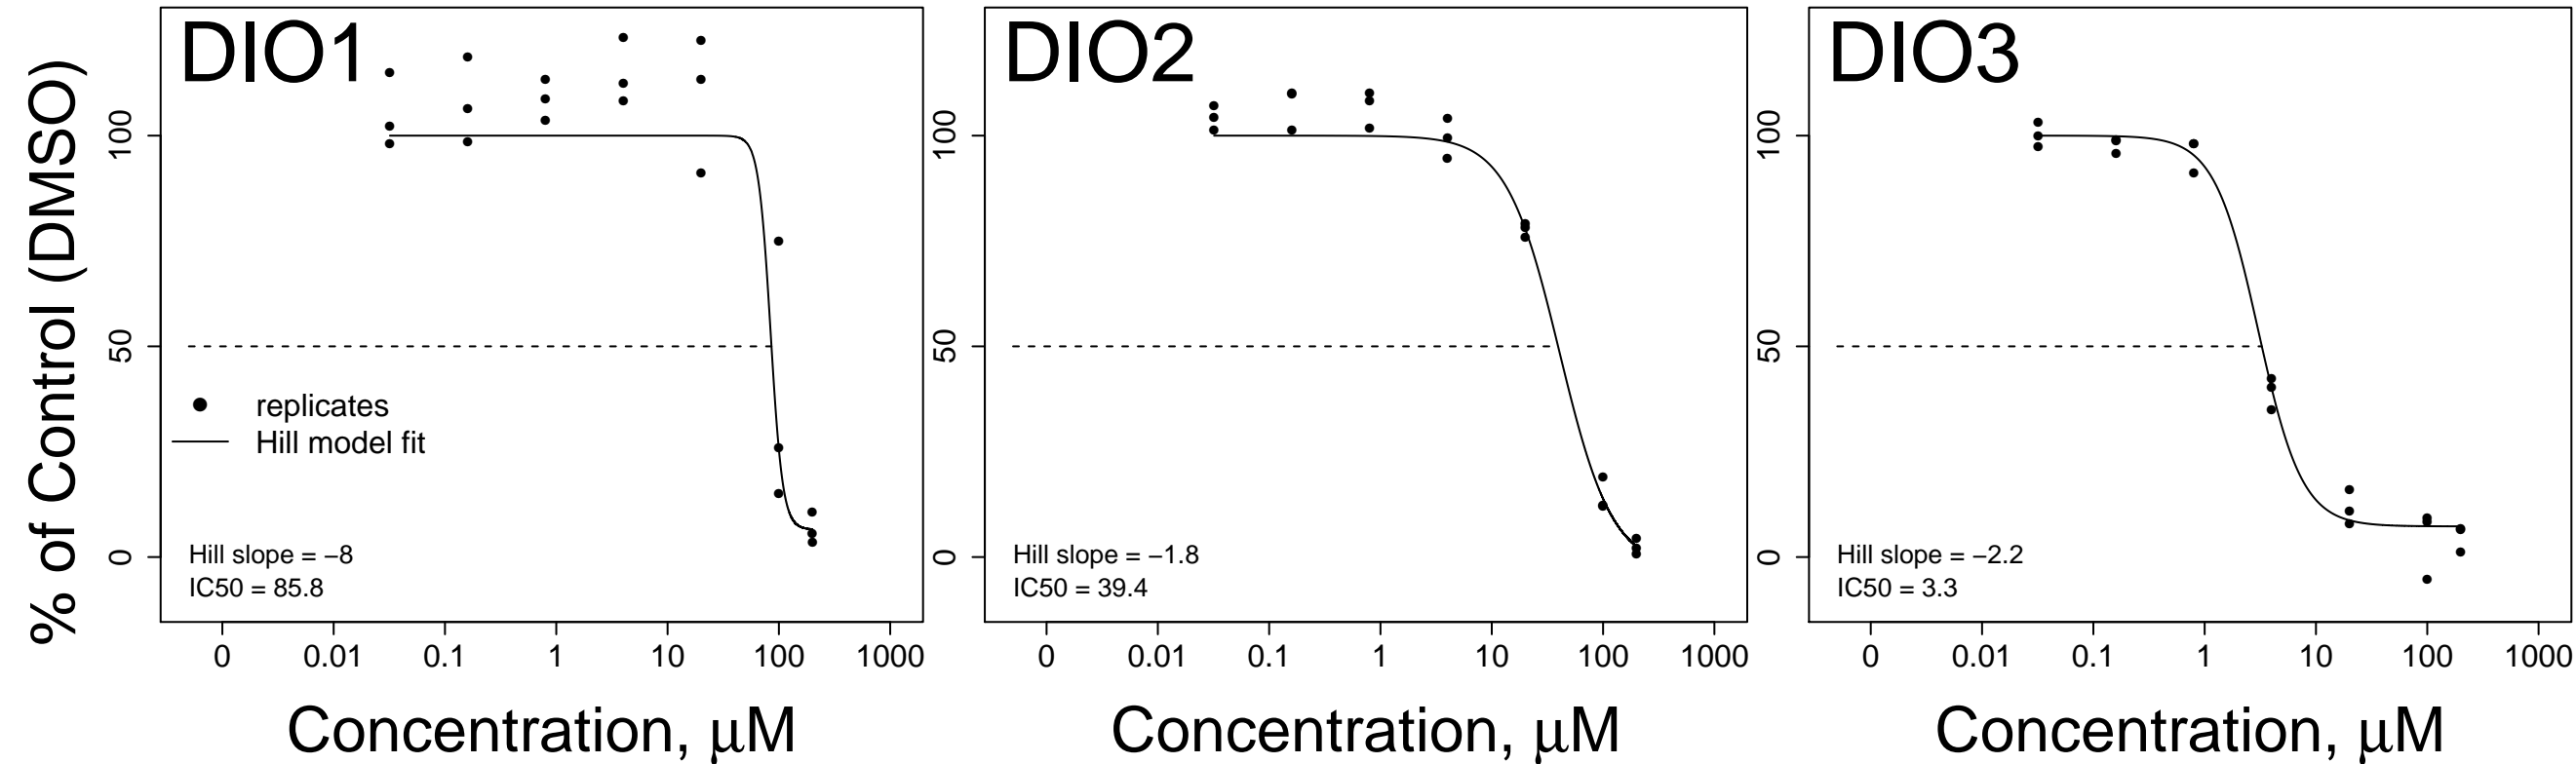

# Bromophenol blue CASRN: 115-39-9

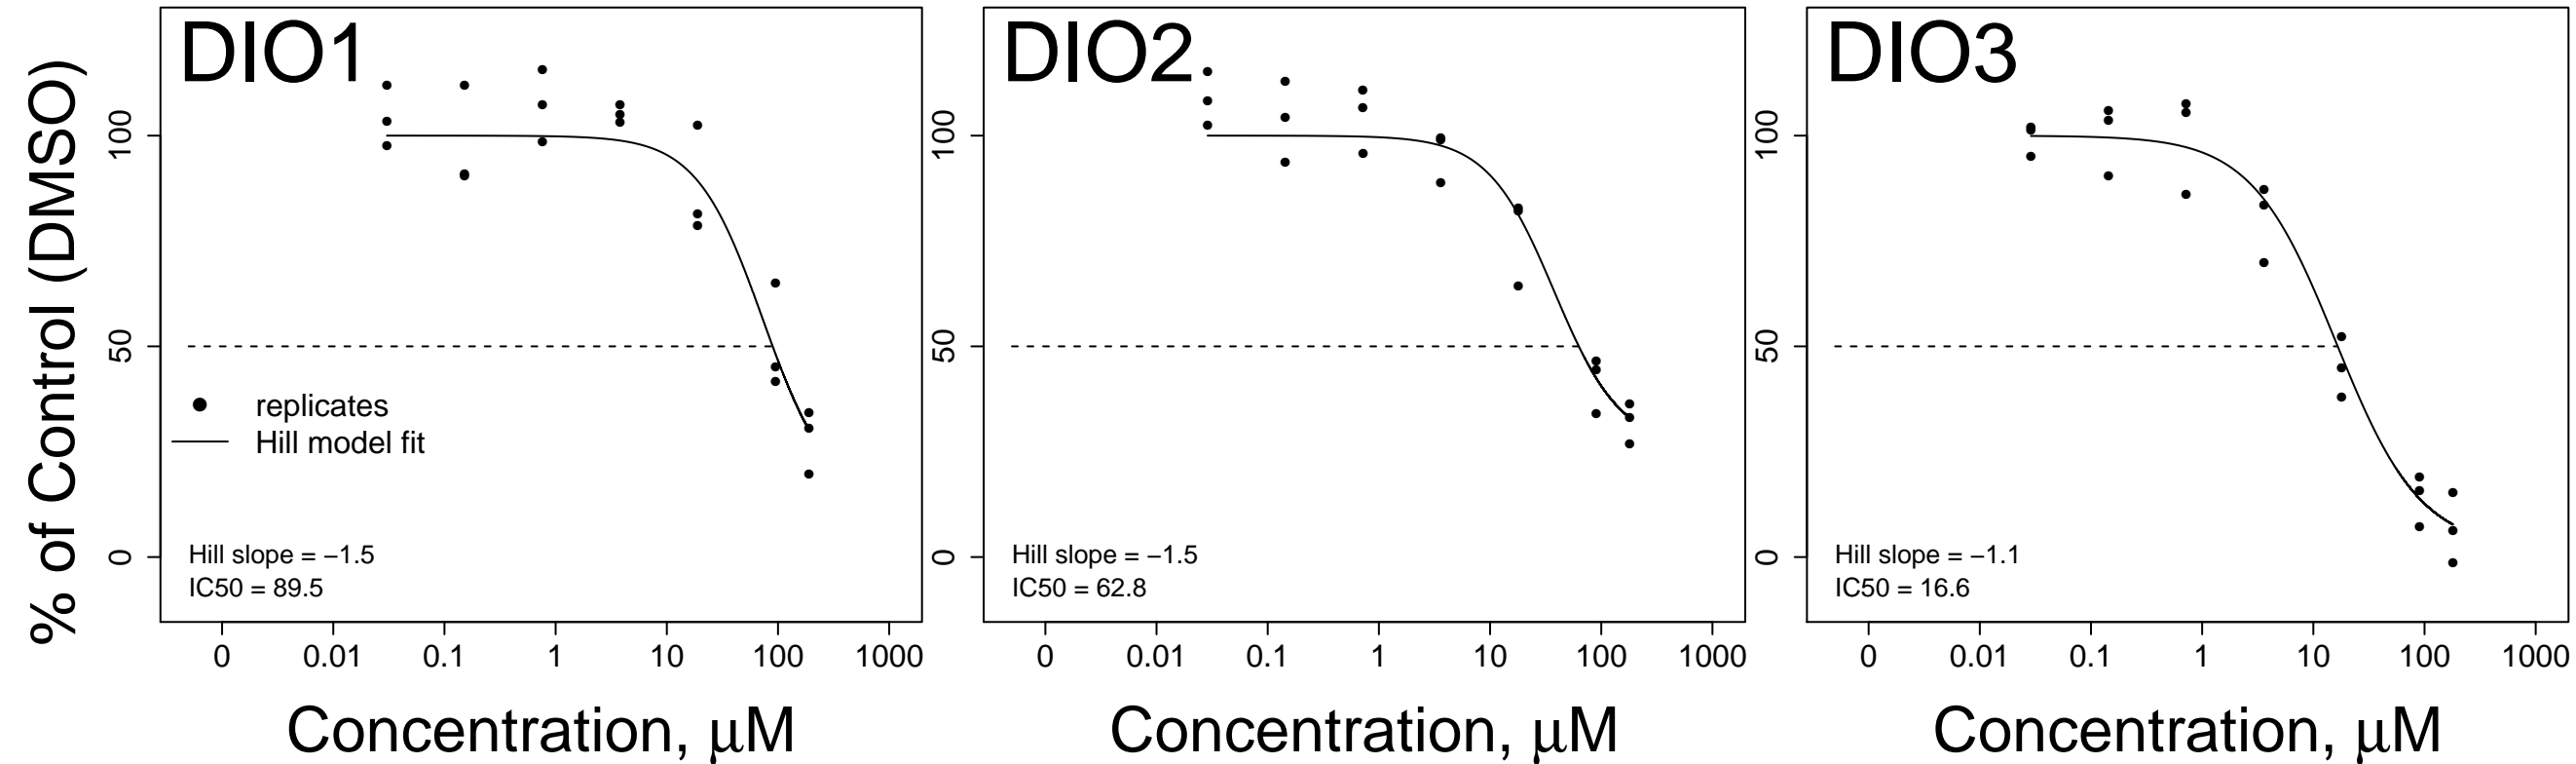

Dodecyl gallate CASRN: 1166-52-5

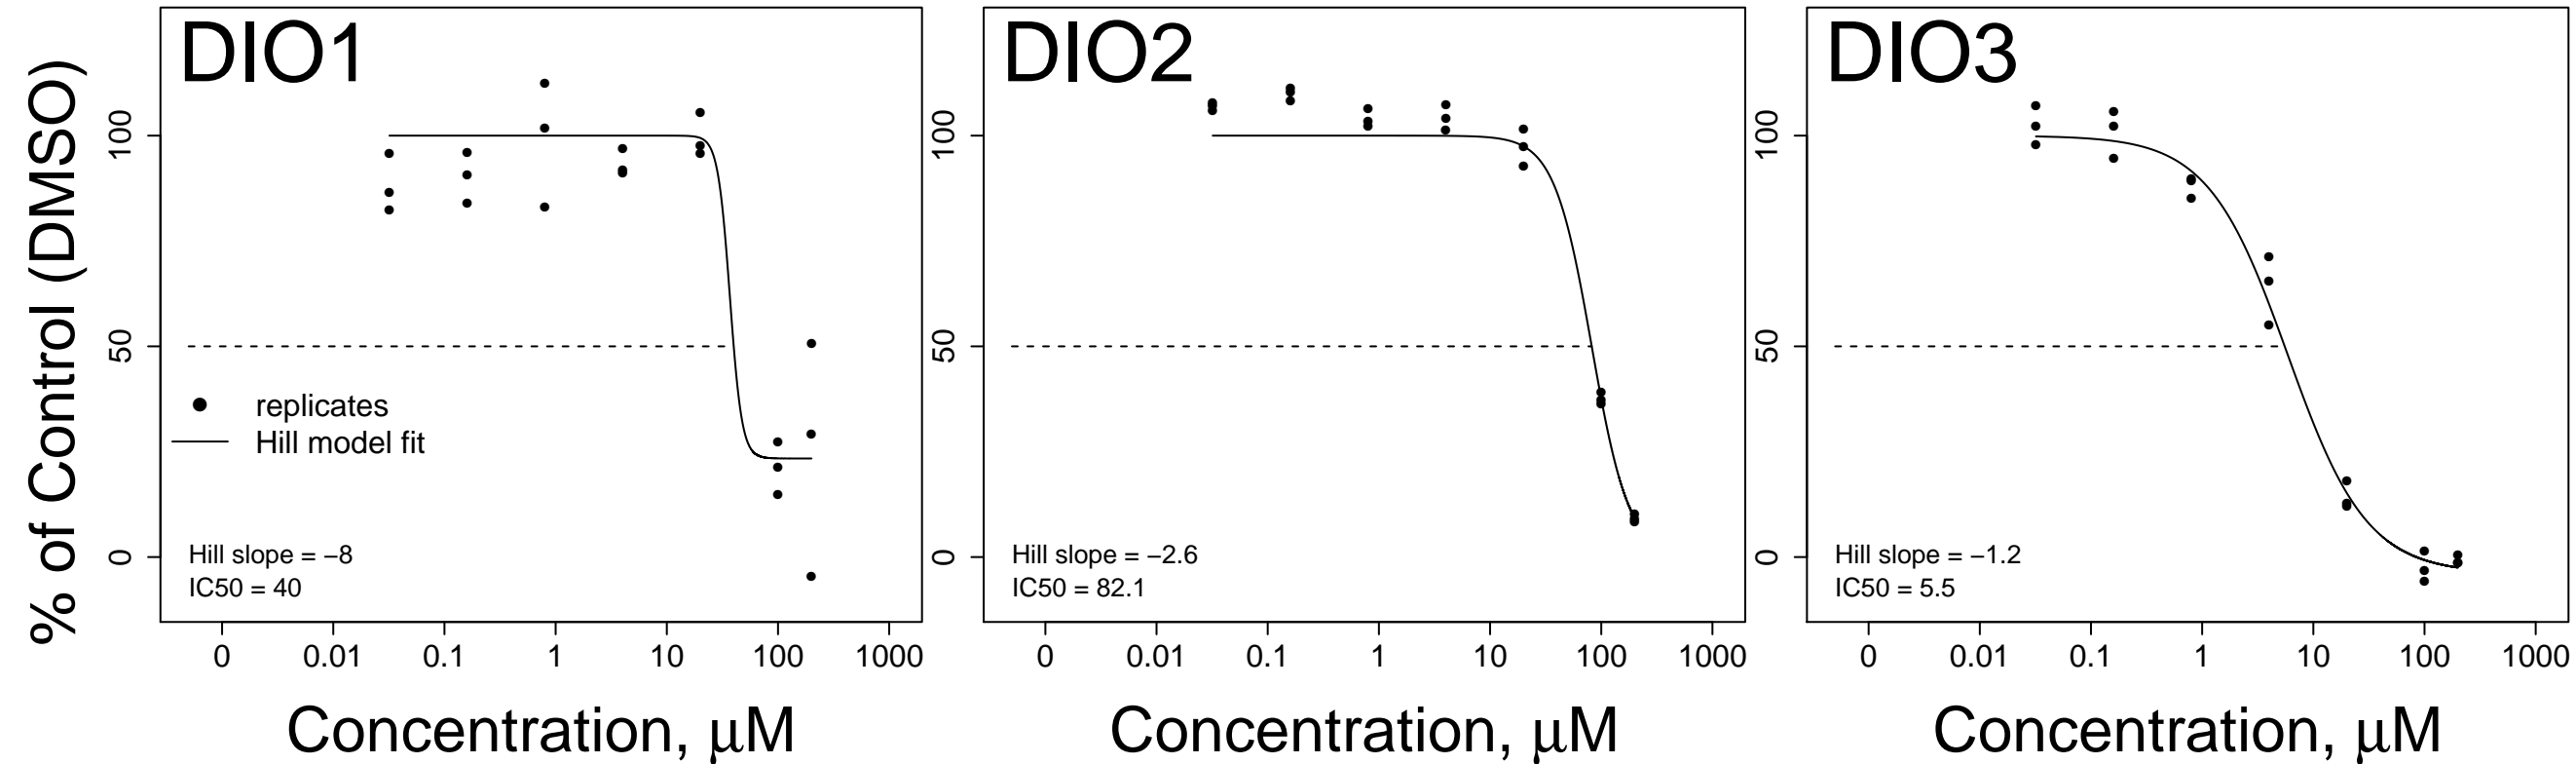

Dichlone CASRN: 117-80-6

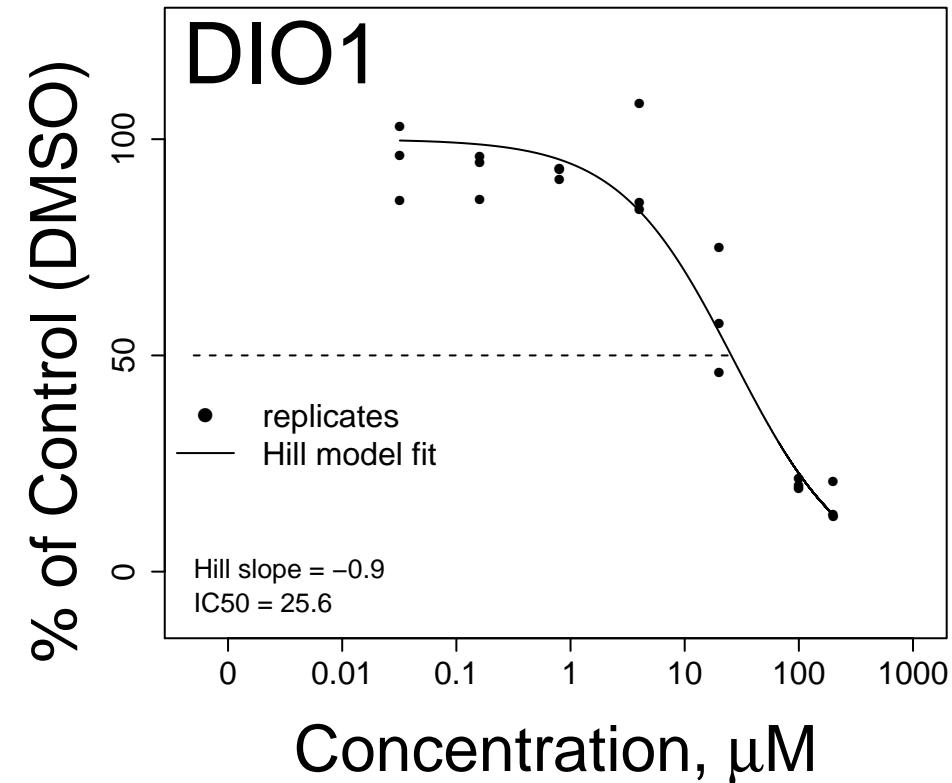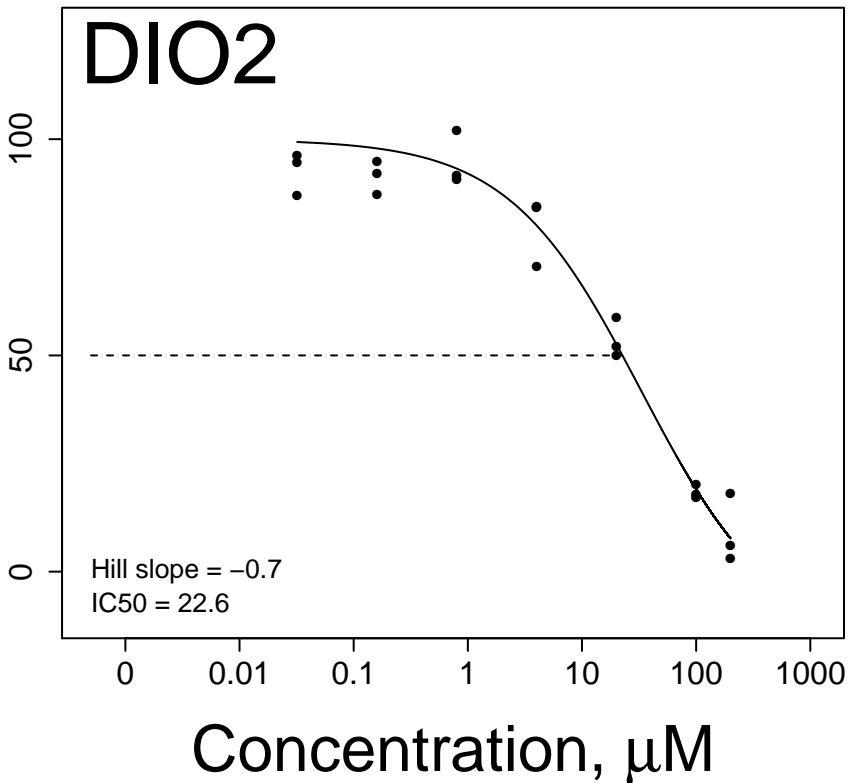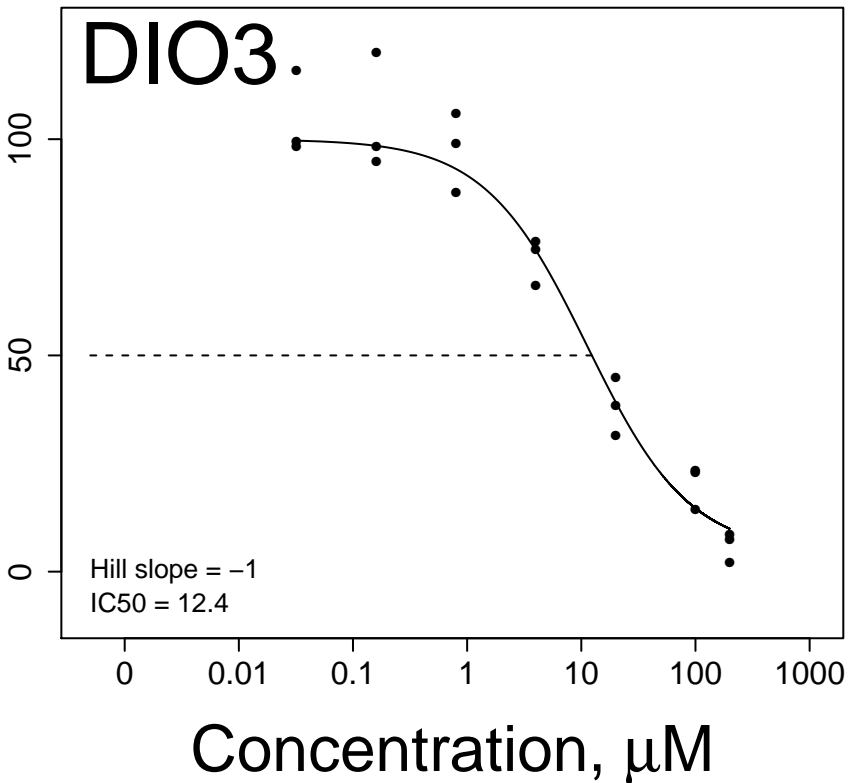

Pyrazolone T CASRN: 118-47-8

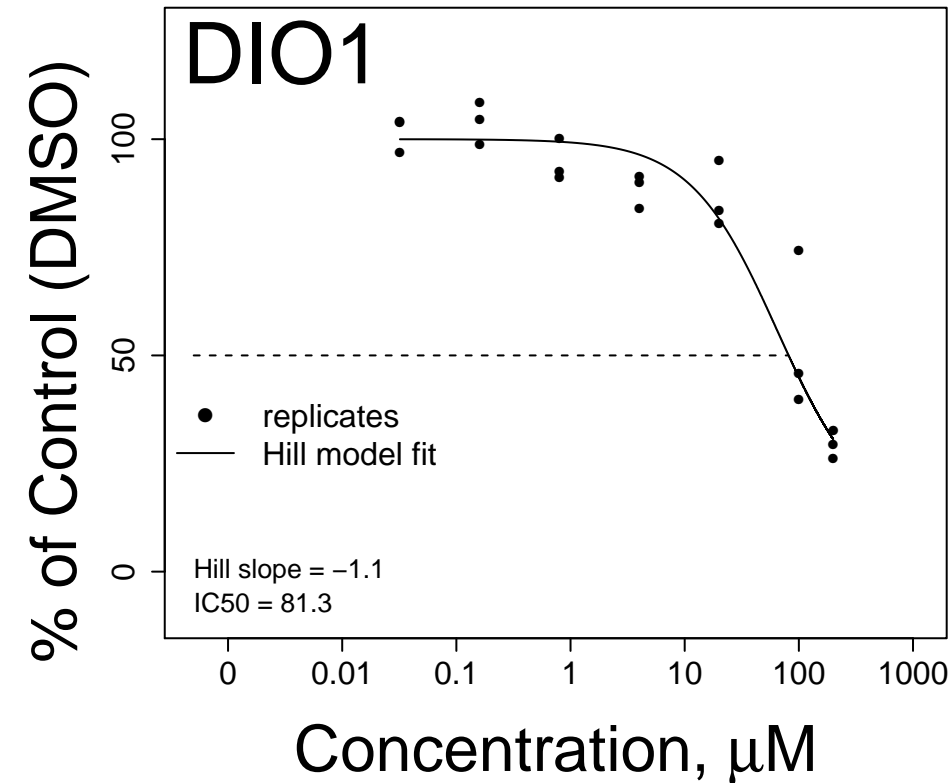

1,3-Butyleneglycol dimethacrylate CASRN: 1189-08-8

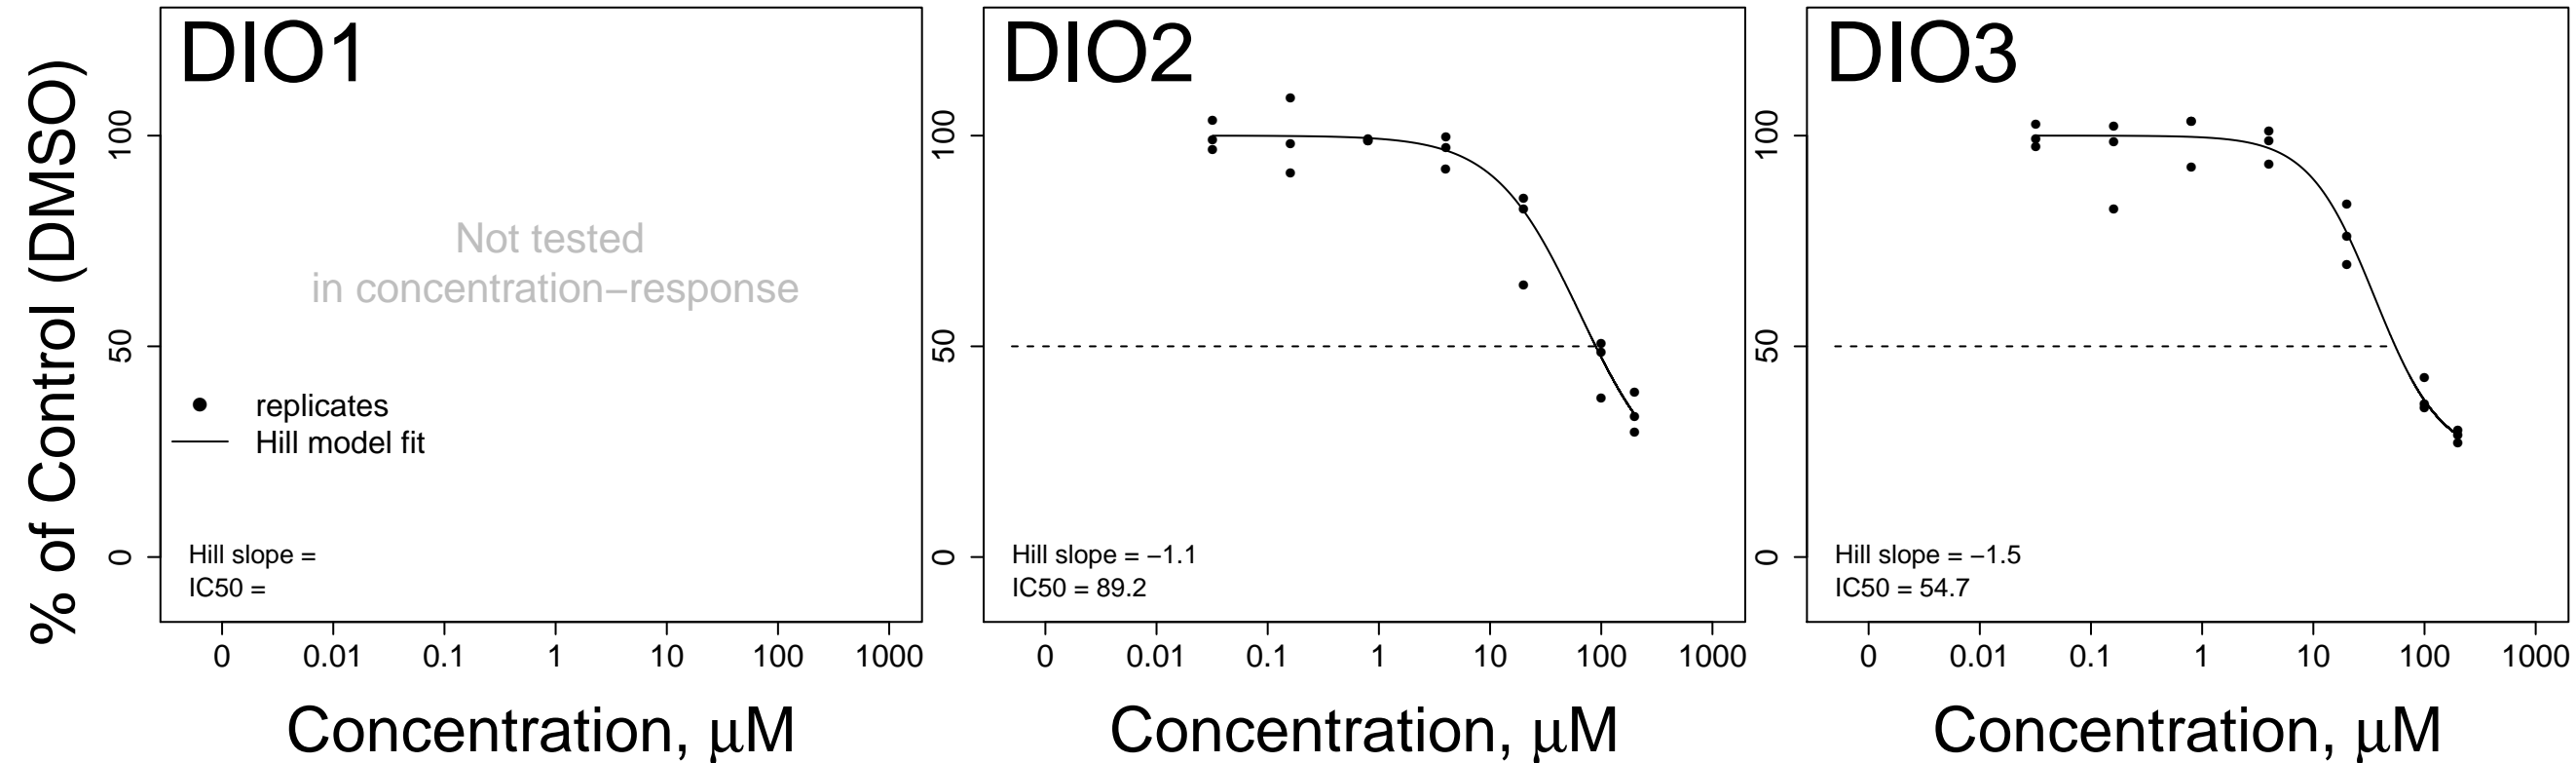

2,2'-Methylenebis(4-methyl-6-tert-butylphenol) CASRN: 119-47-1

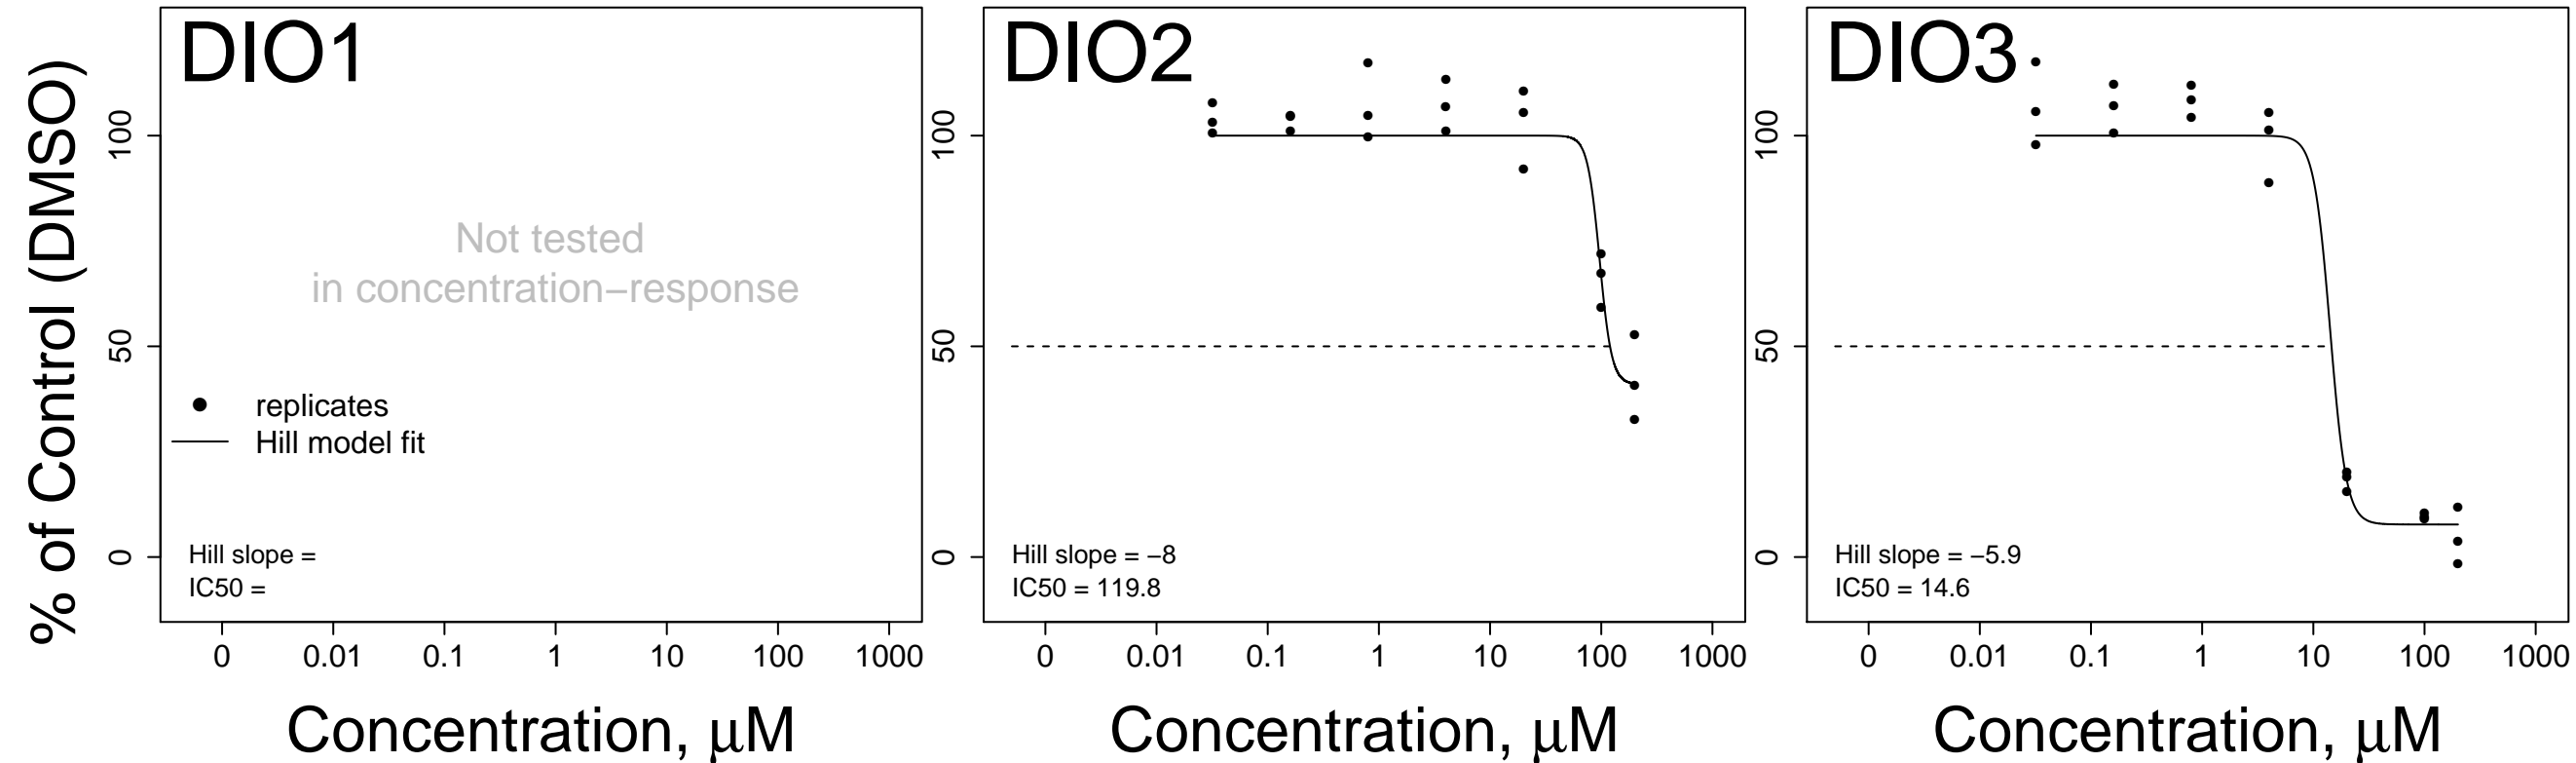

4,5-Dichloro-3H-1,2-dithiol-3-one CASRN: 1192-52-5

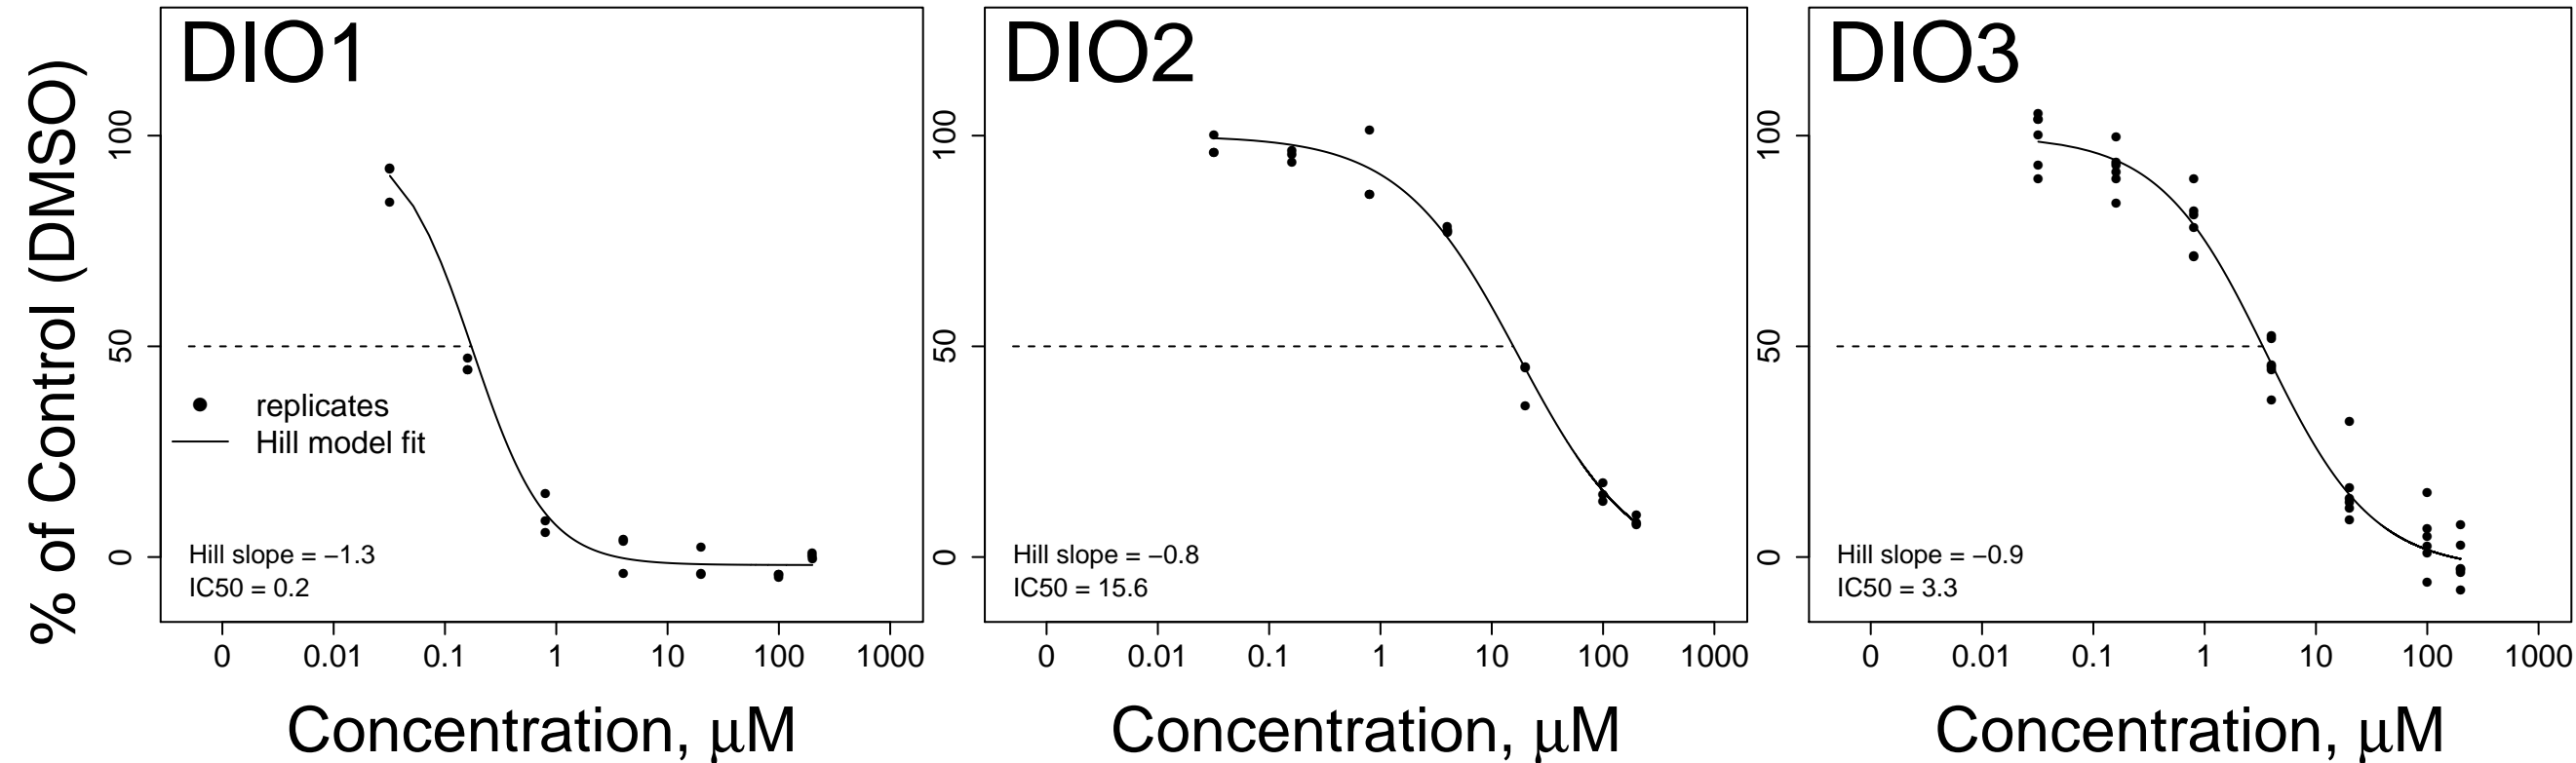



# Octylparaben CASRN: 1219-38-1

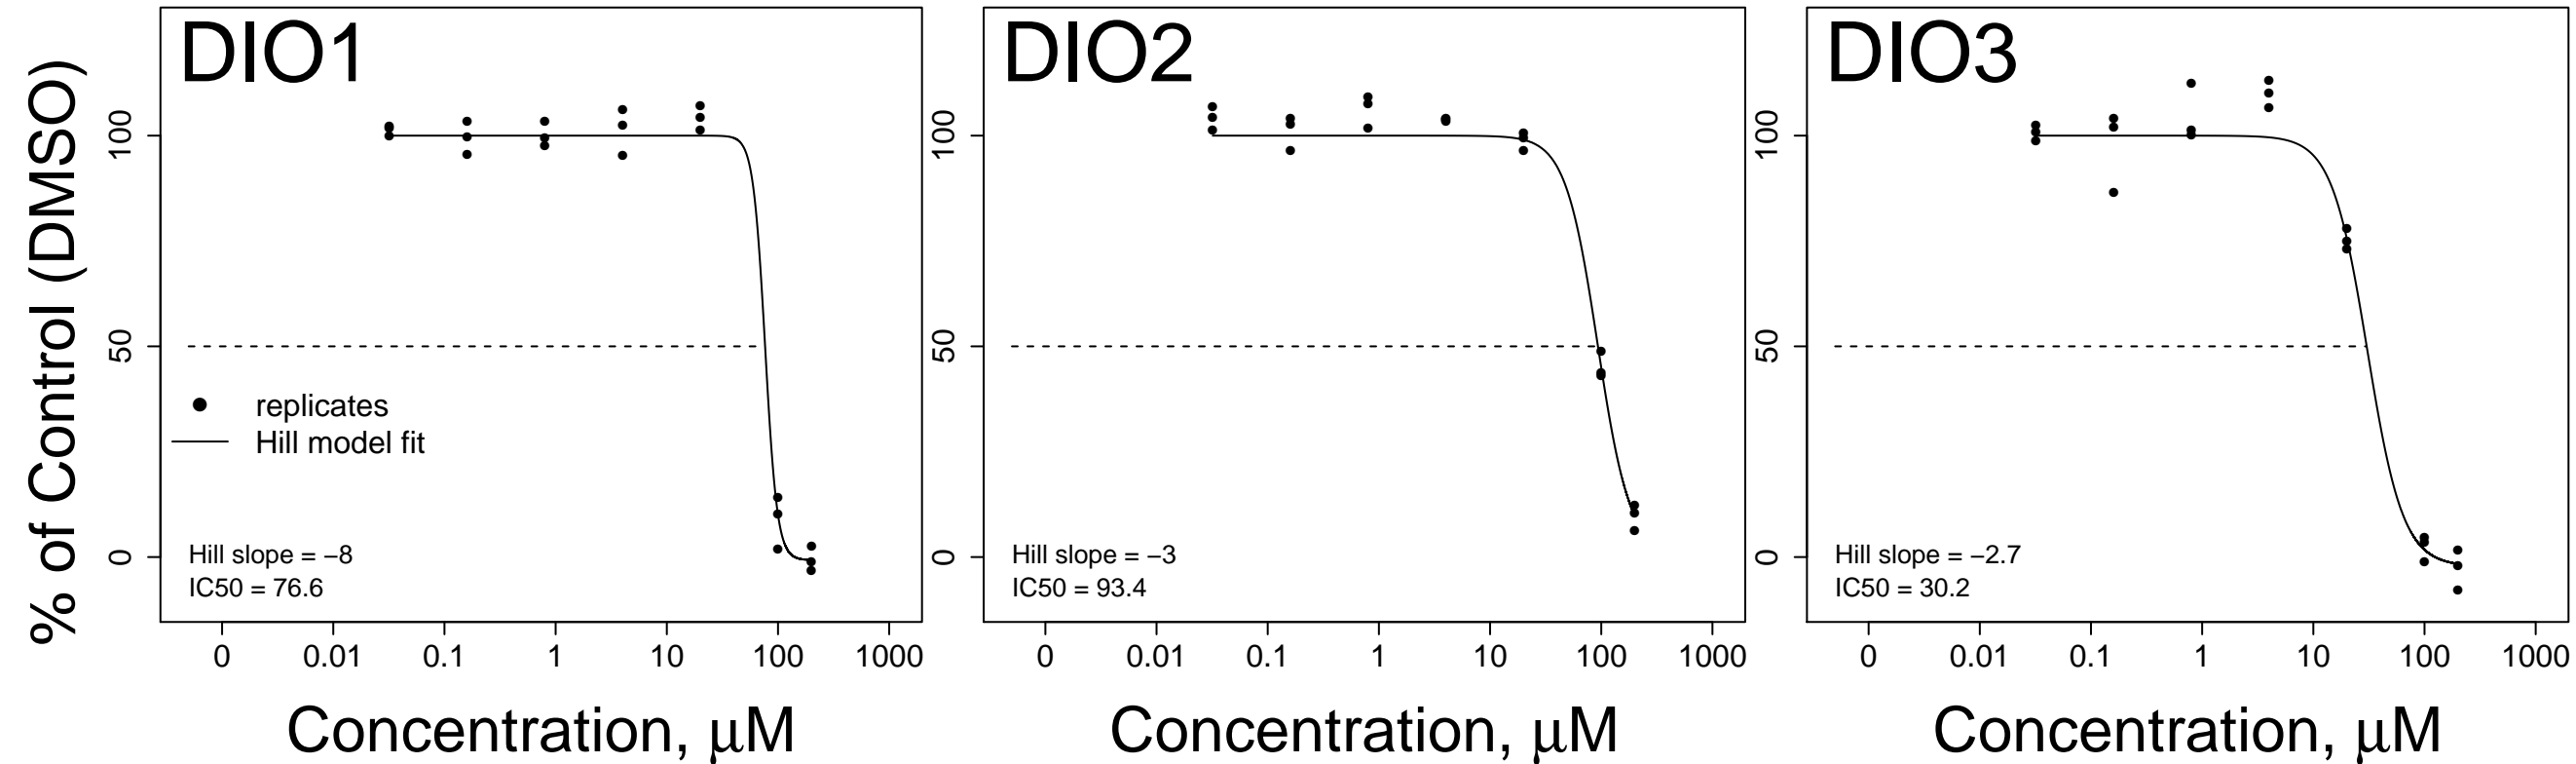

Pentylcinnamaldehyde CASRN: 122-40-7

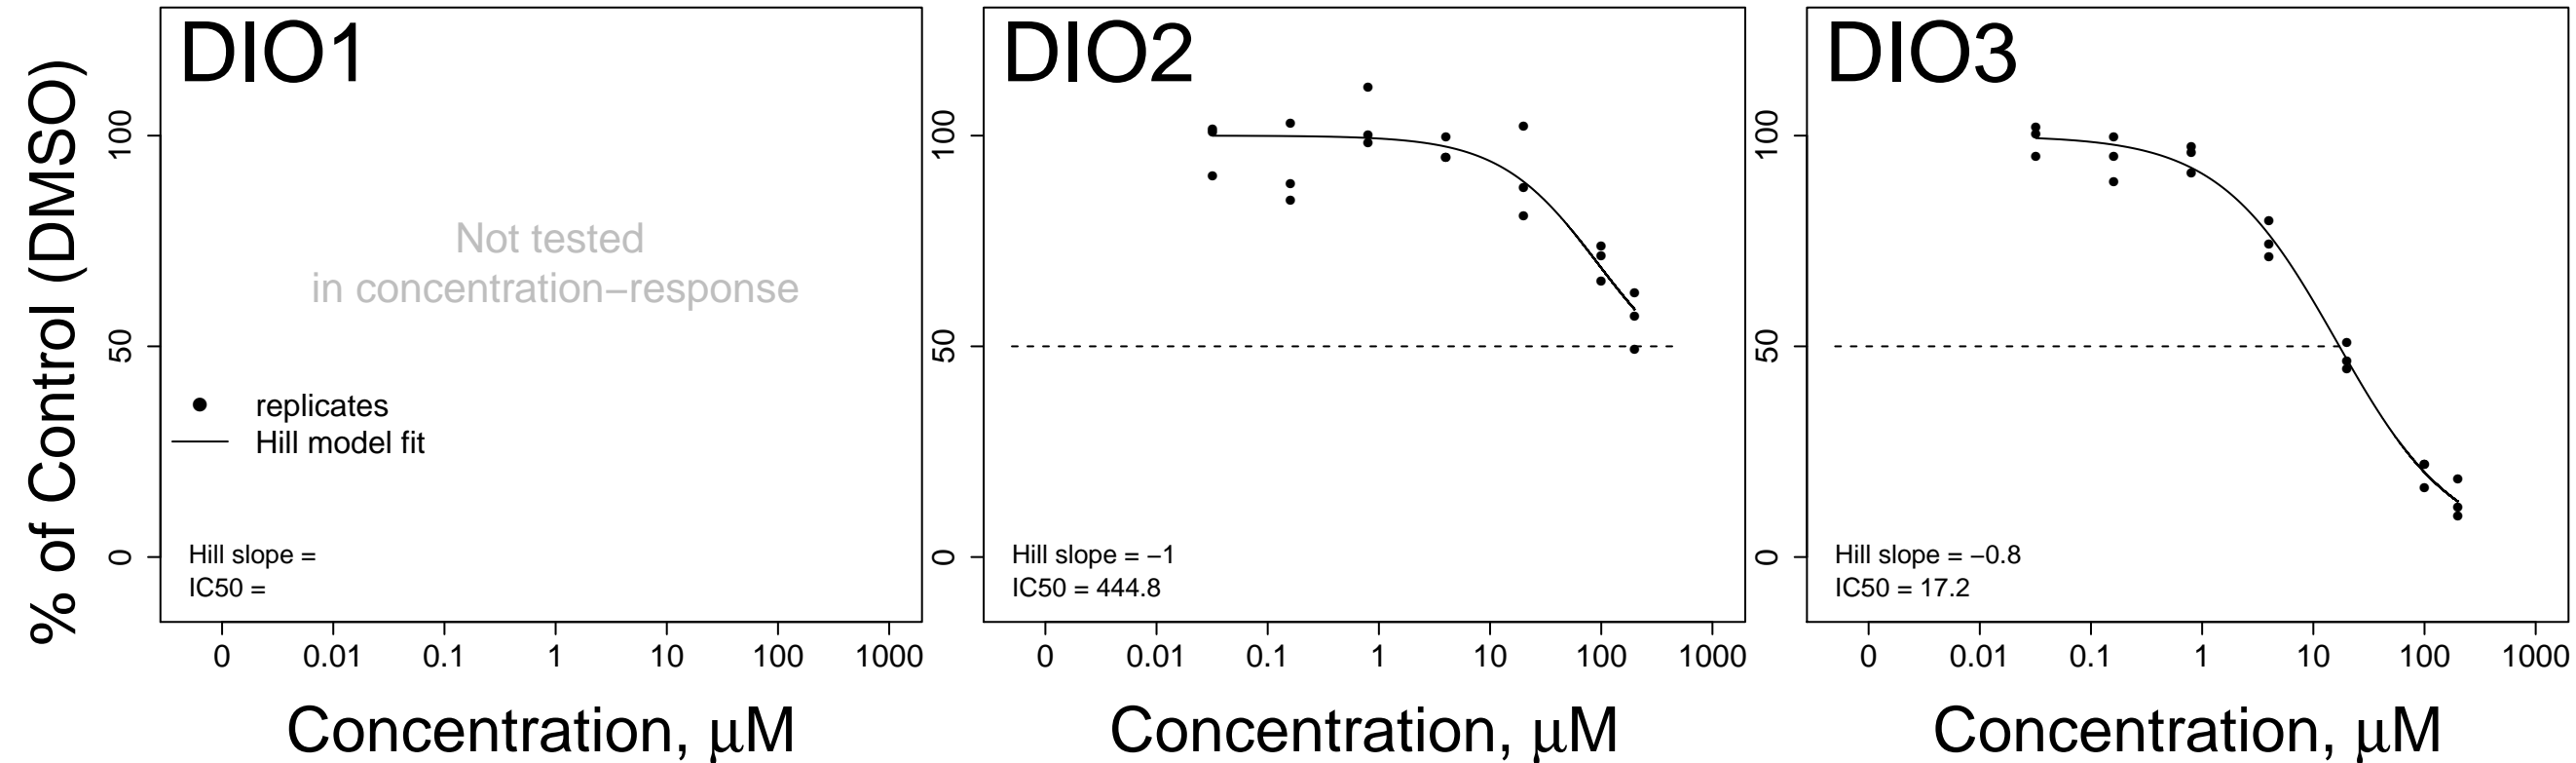

Phenylacetaldehyde CASRN: 122-78-1

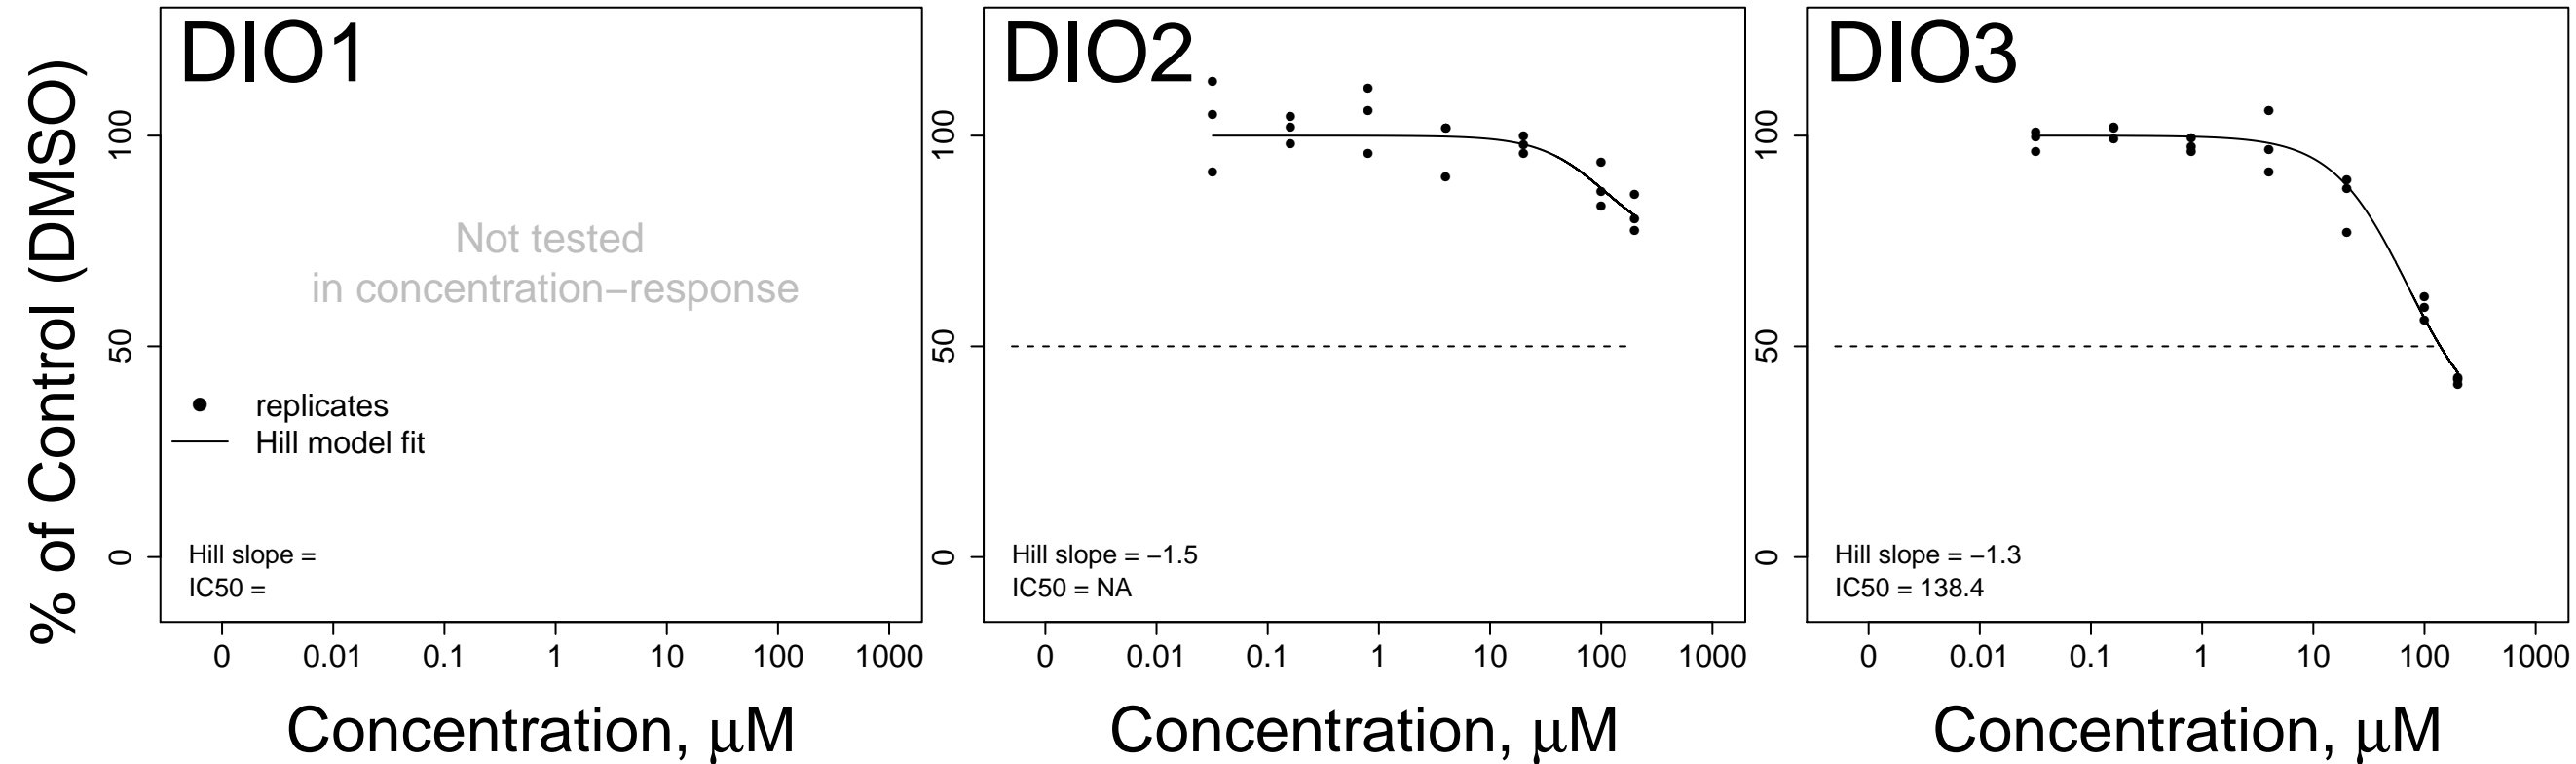

# 1-Dodecanamine CASRN: 124-22-1

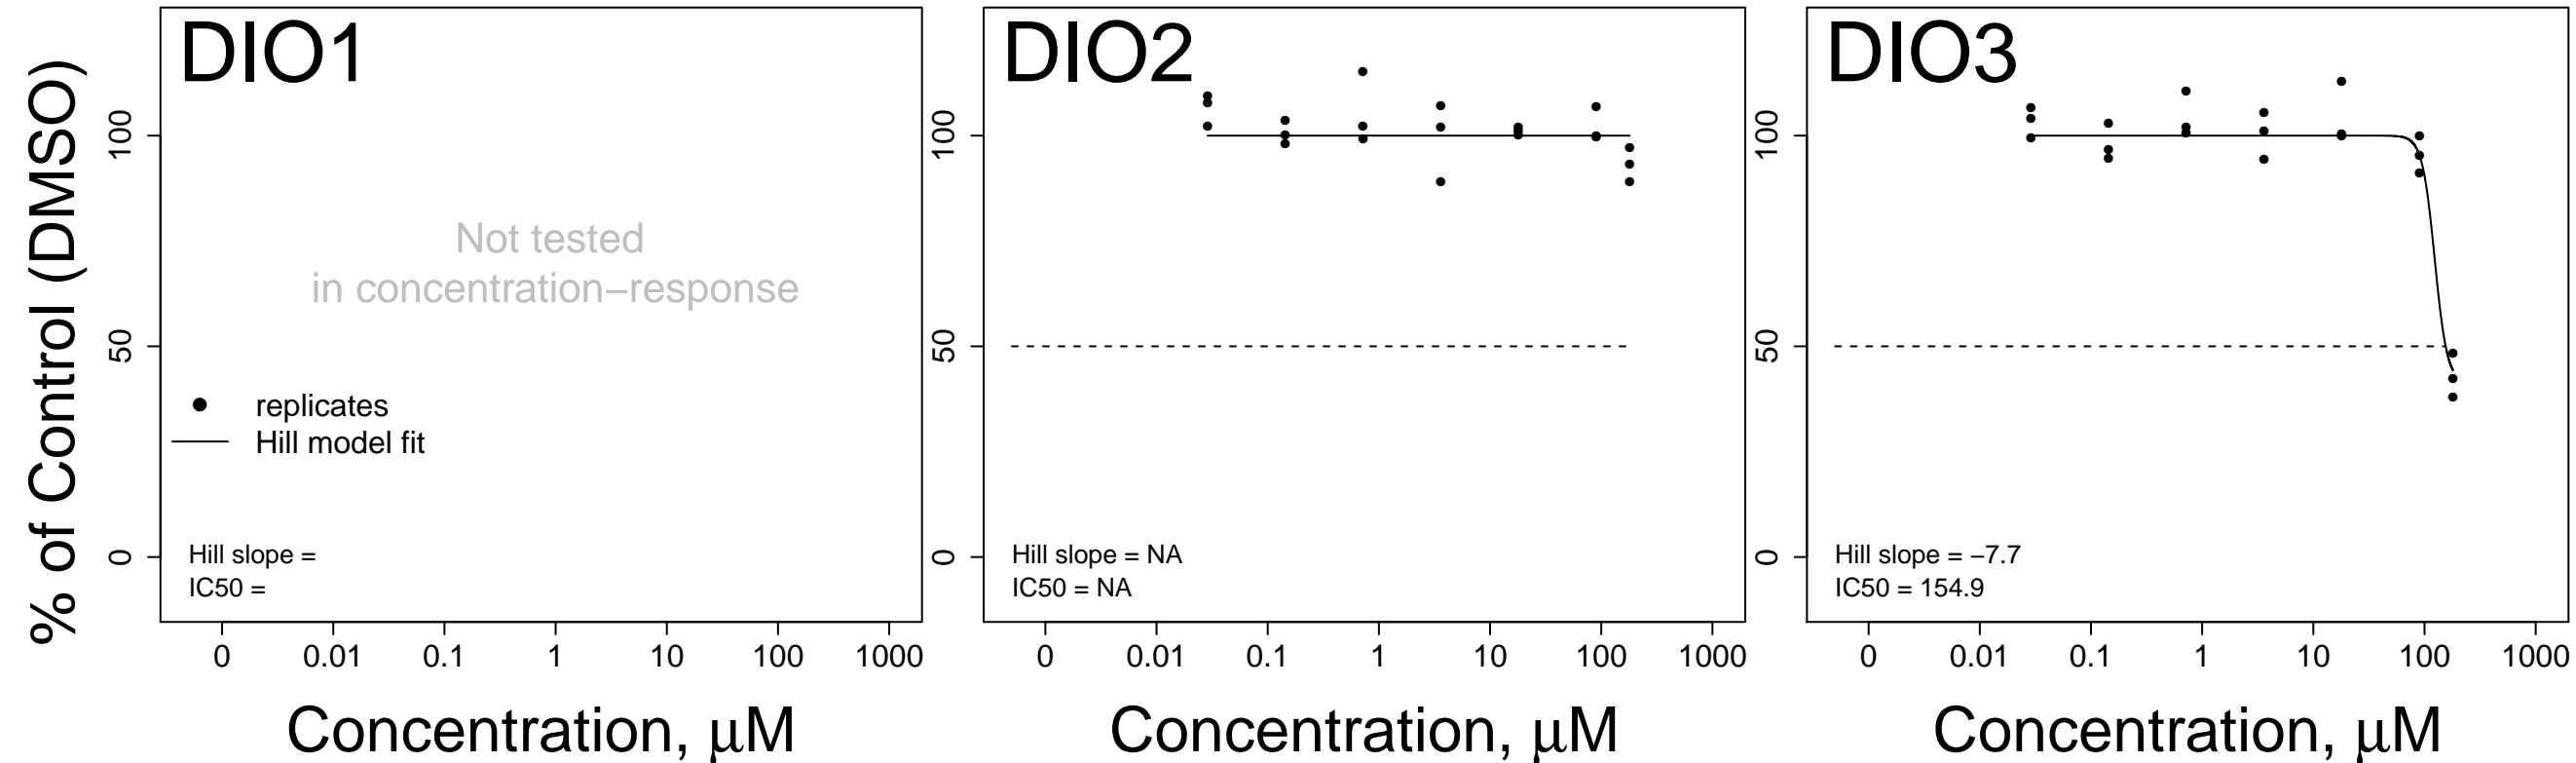

Methyl abietate CASRN: 127-25-3

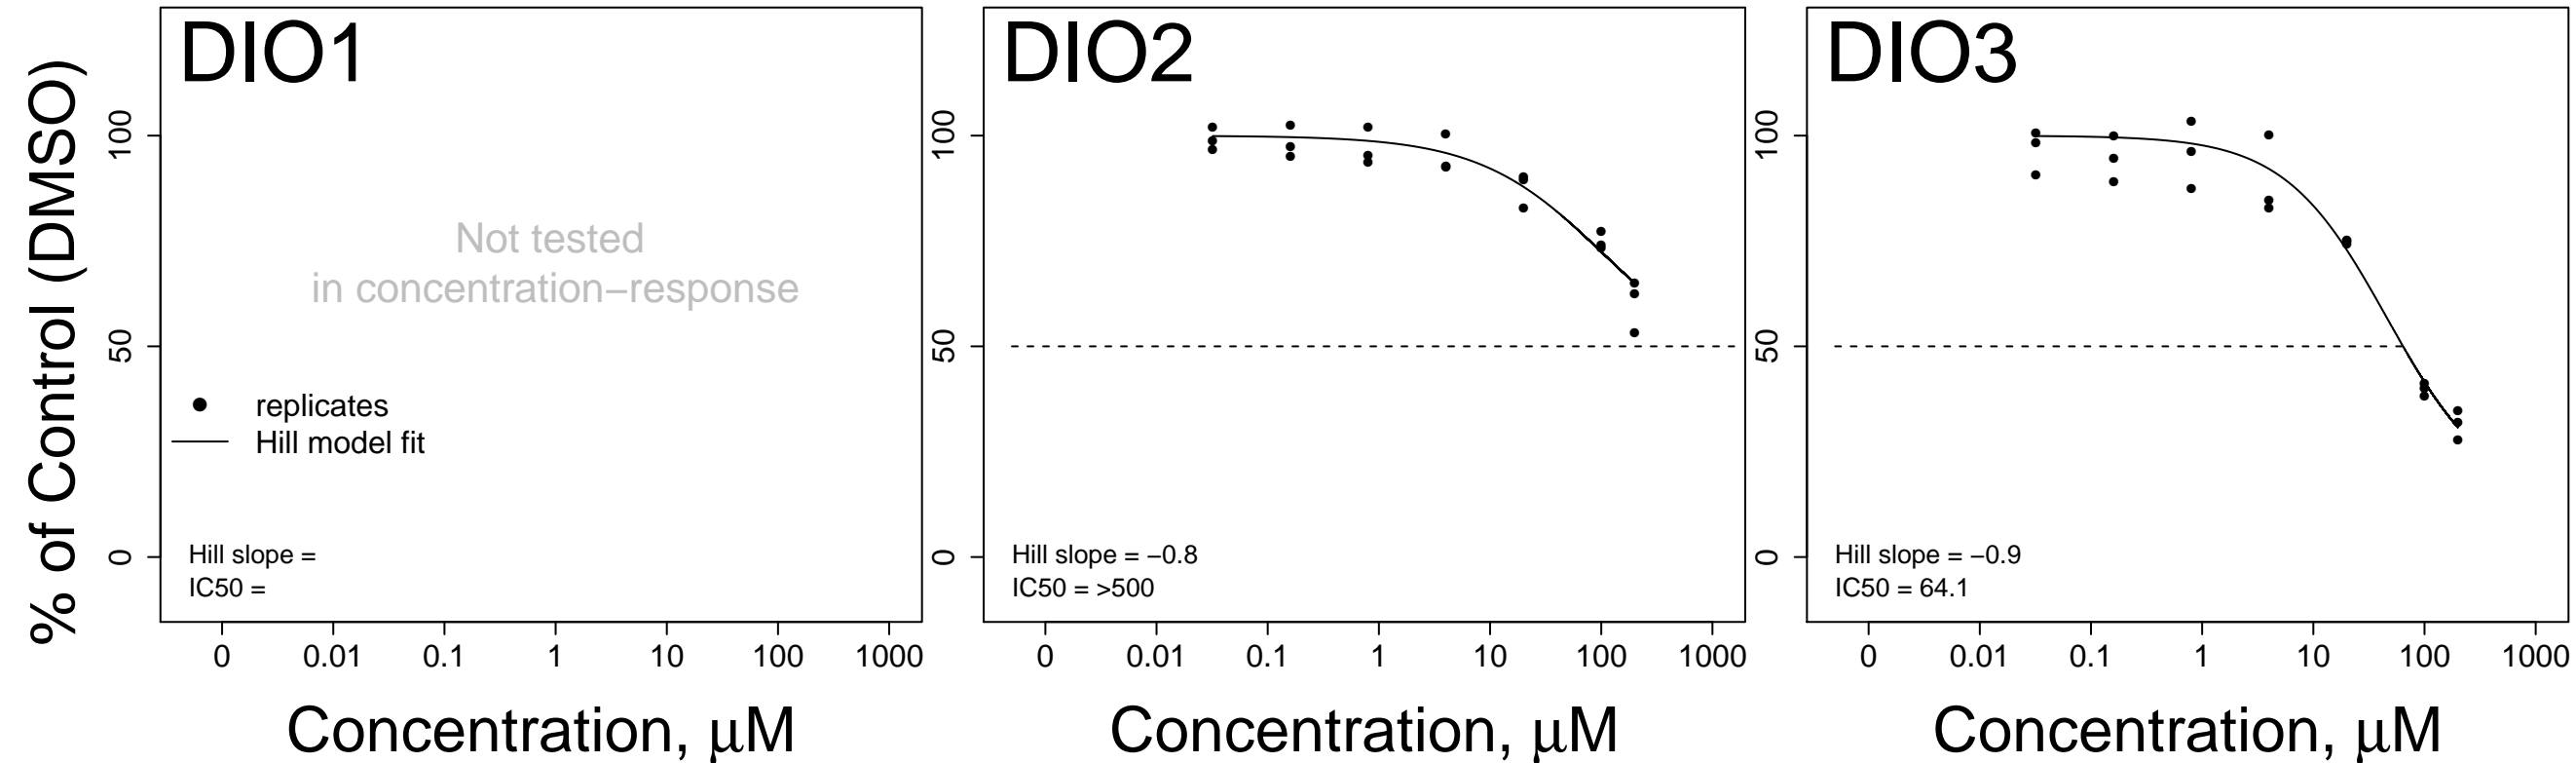

Retinol acetate CASRN: 127-47-9

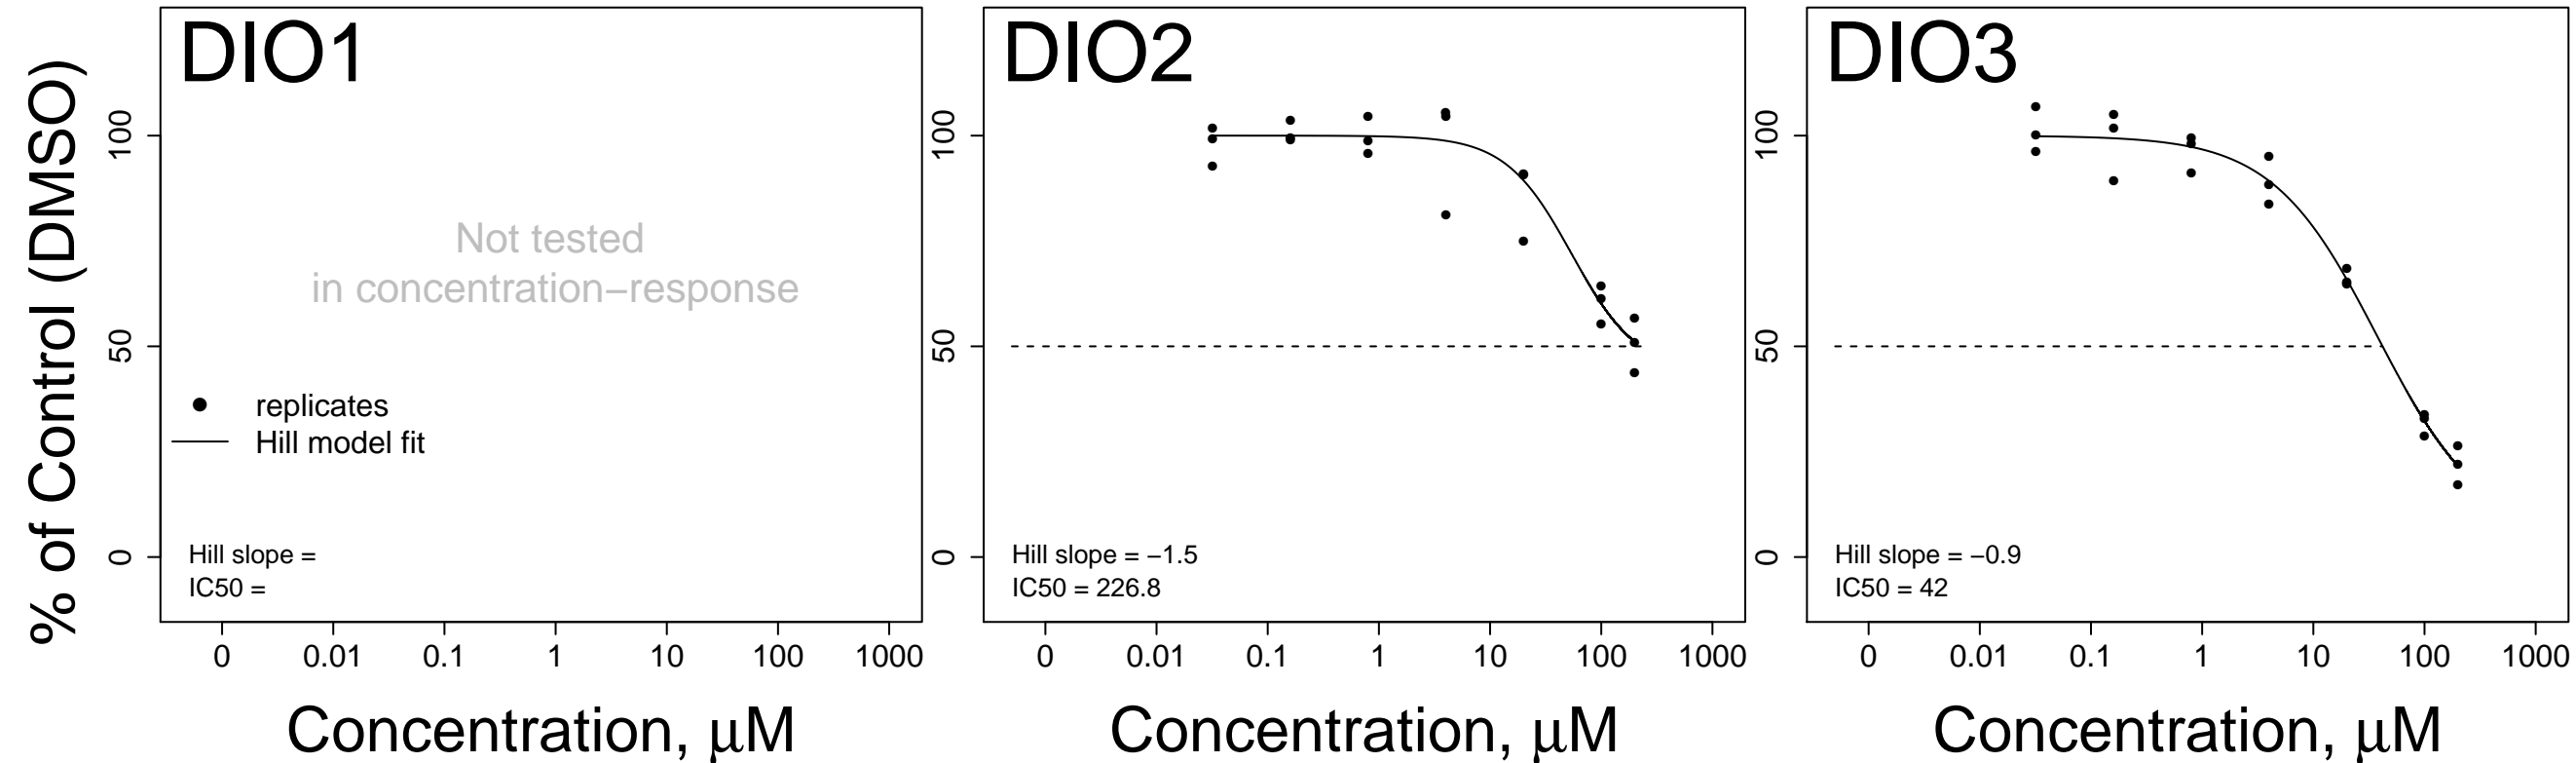

C.I. Acid Orange 24, monosodium salt CASRN: 1320-07-6

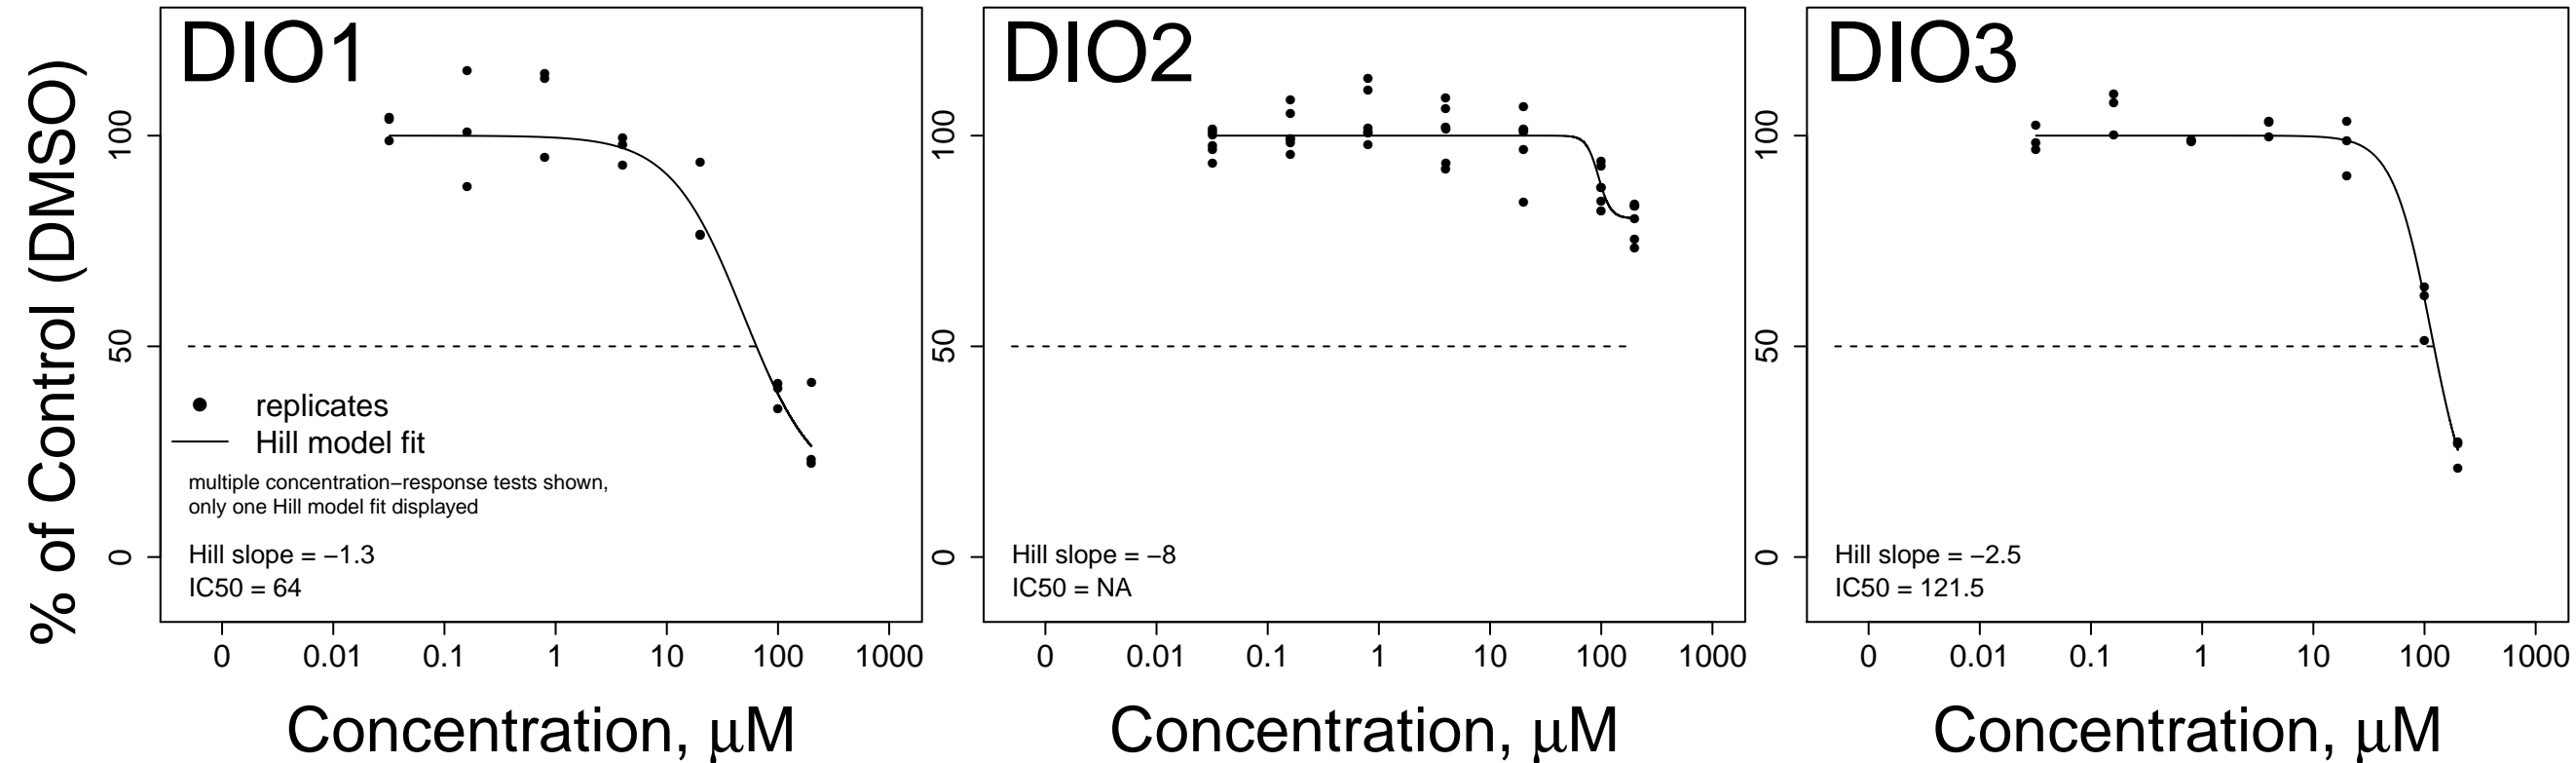

C.I. Disperse Orange 37 CASRN: 13301-61-6

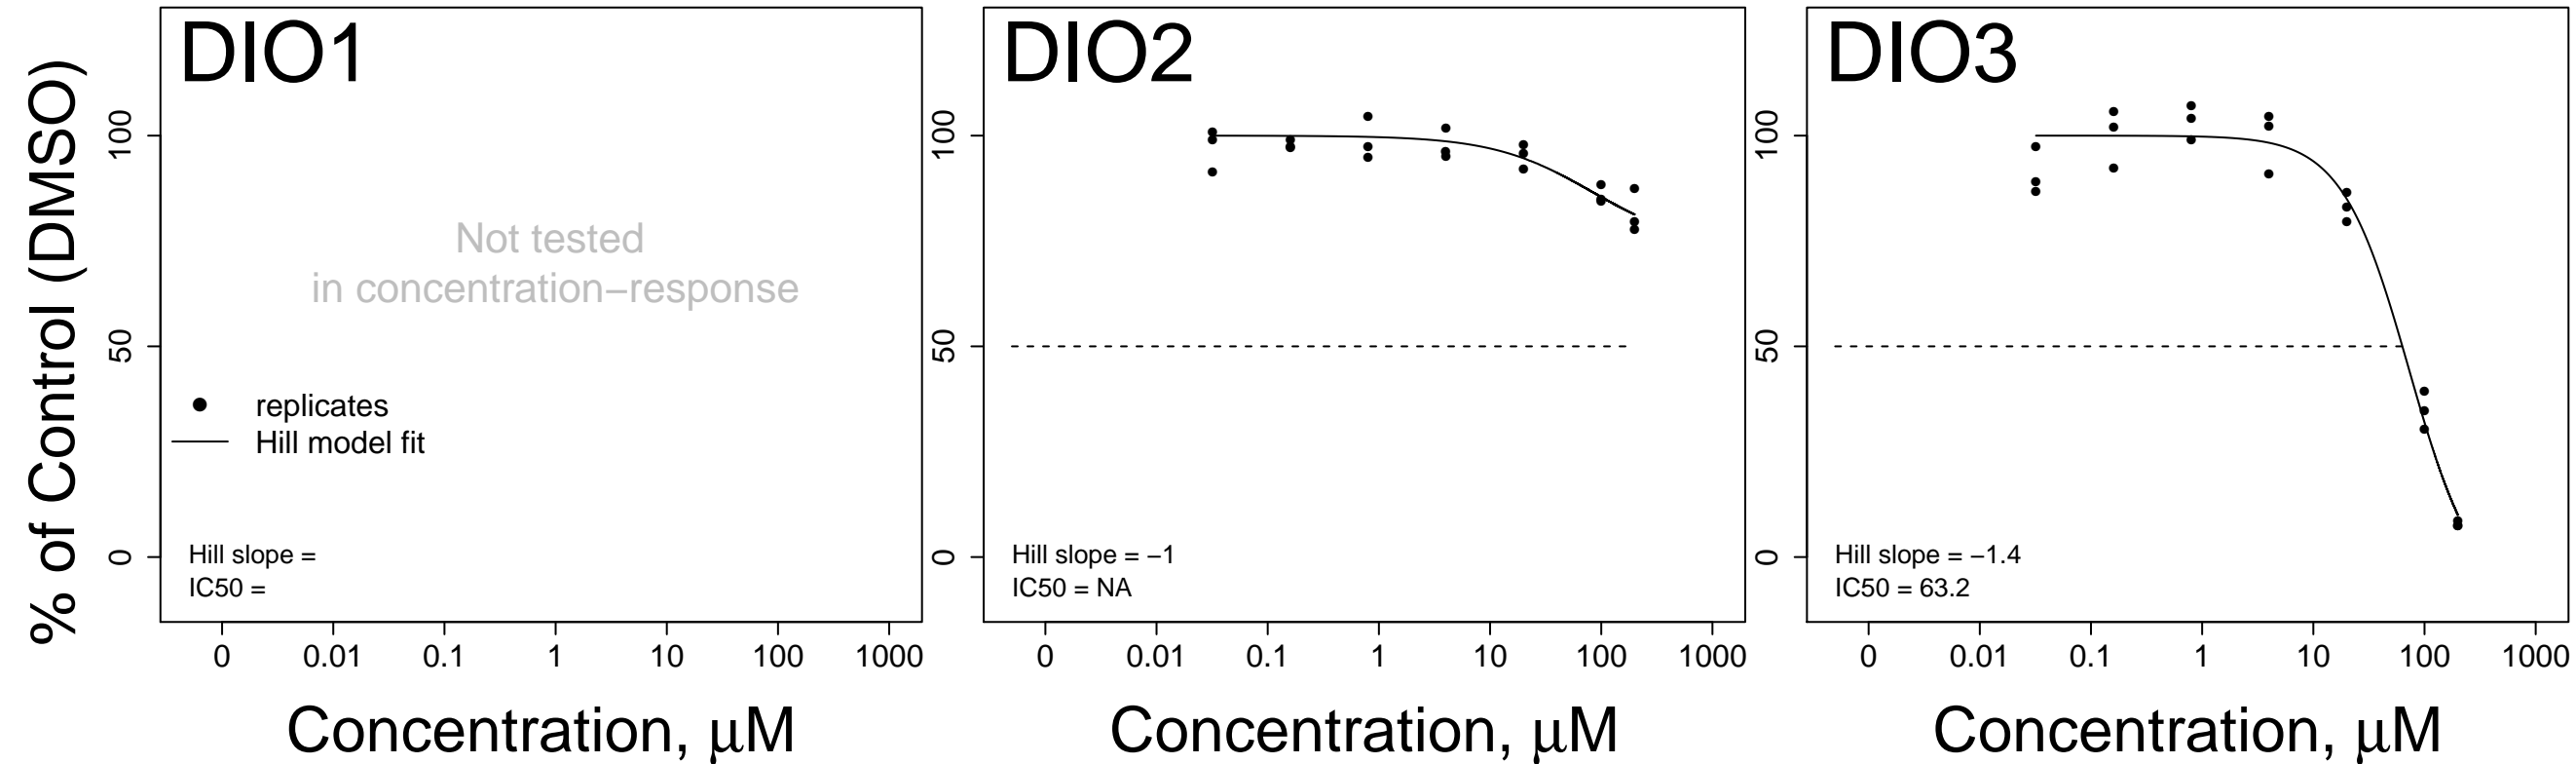



# Methylionone CASRN: 1335-46-2

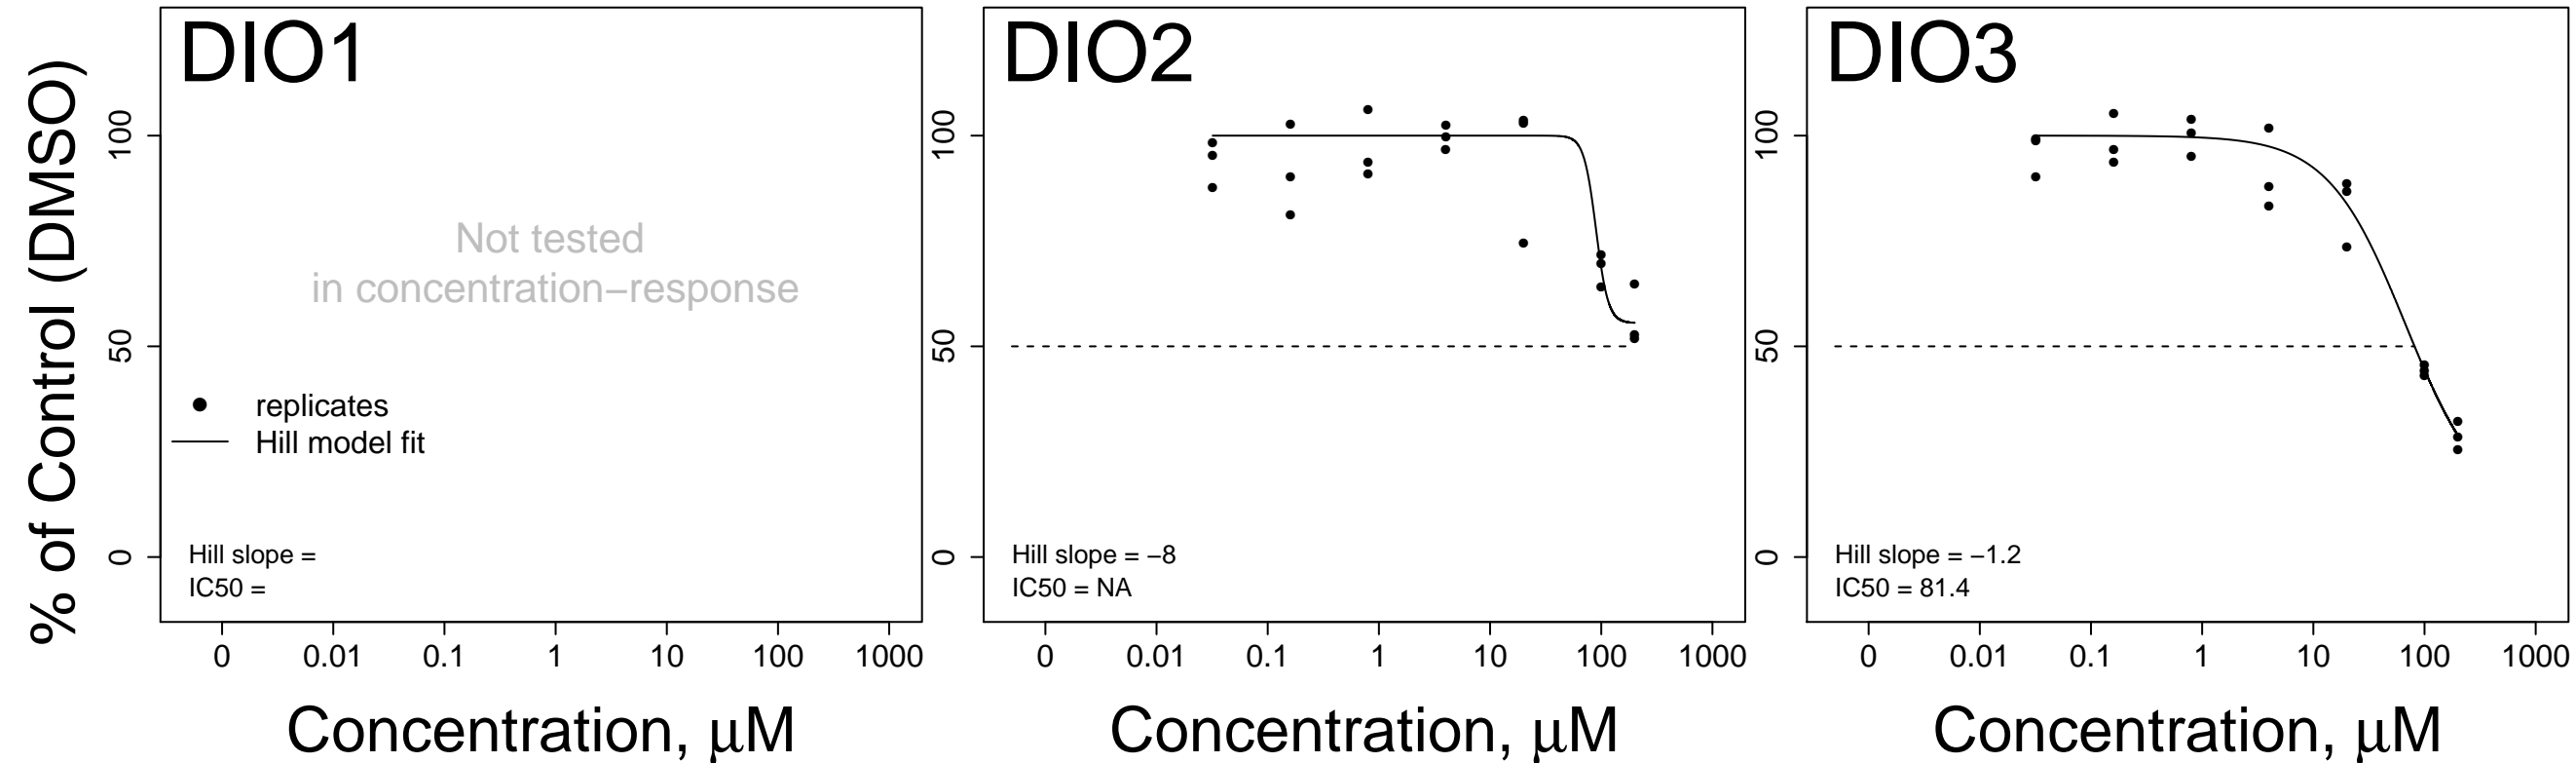

Ascorbyl palmitate CASRN: 137-66-6

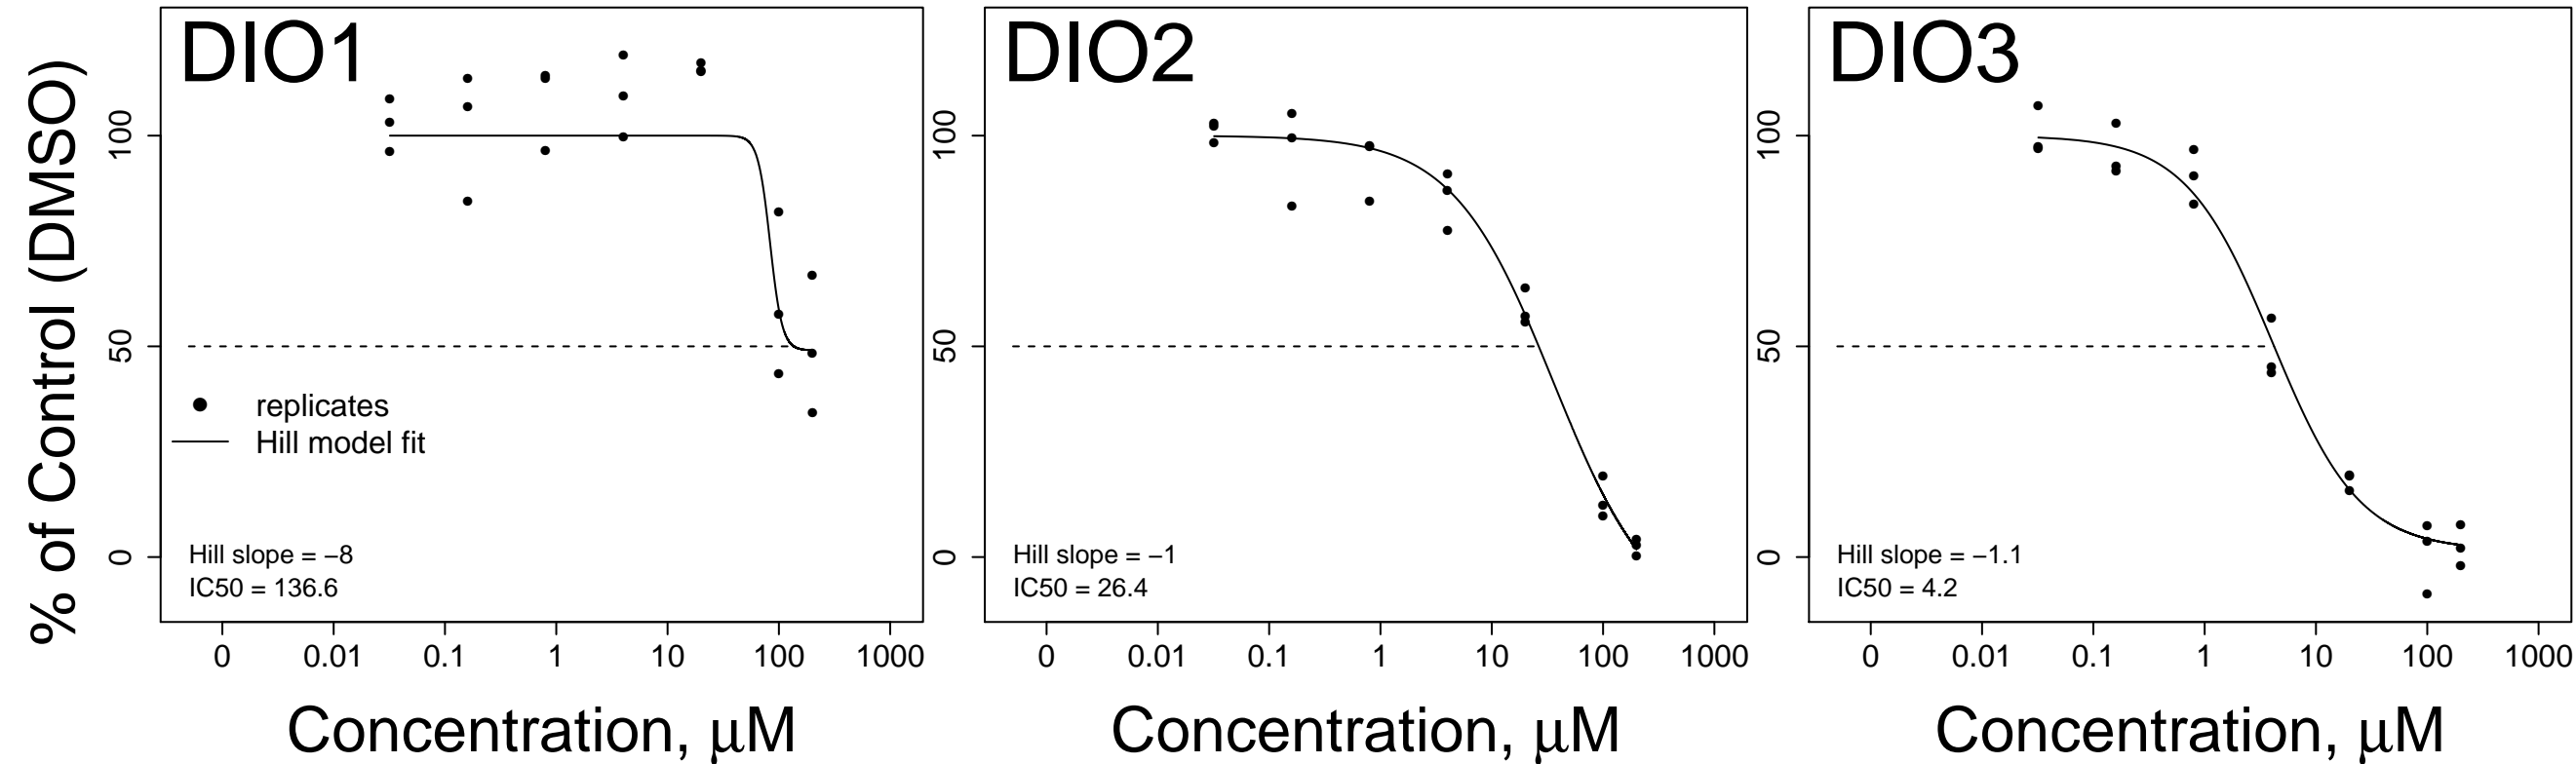

Phenol red CASRN: 143-74-8

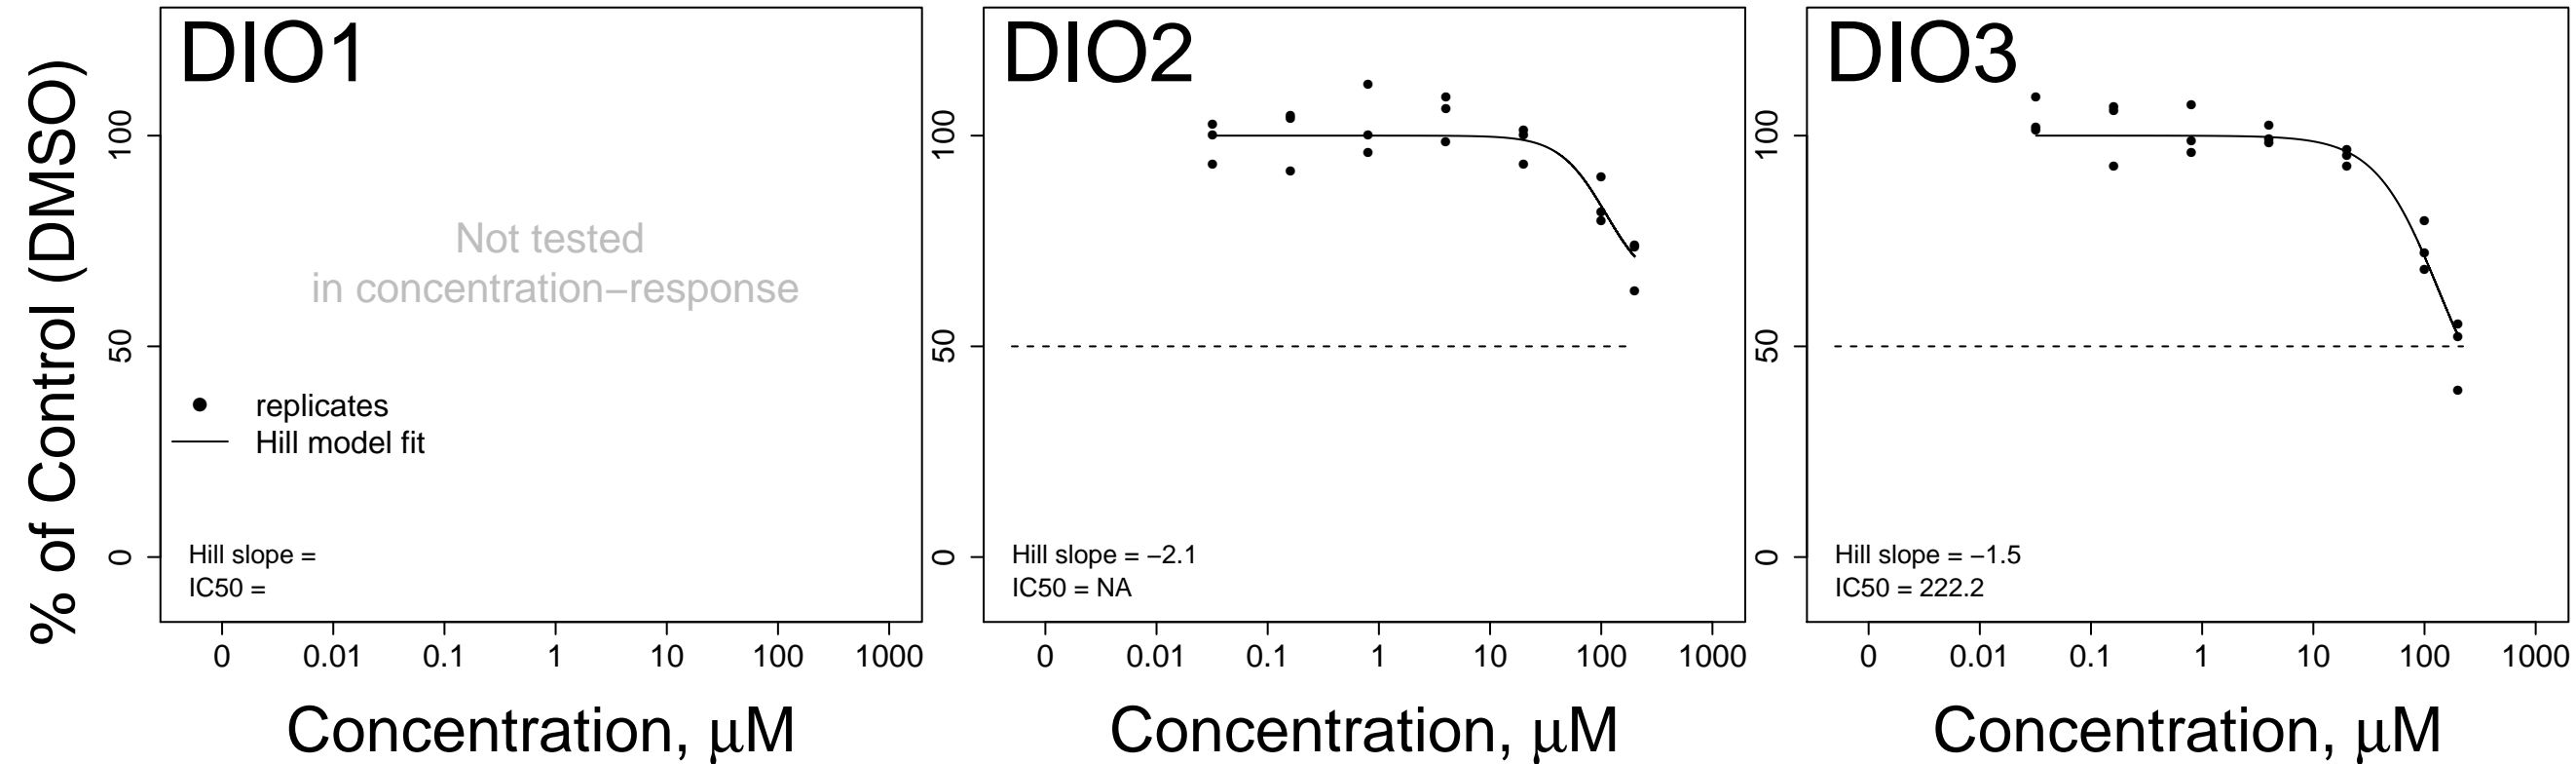

# Sodium abietate CASRN: 14351-66-7

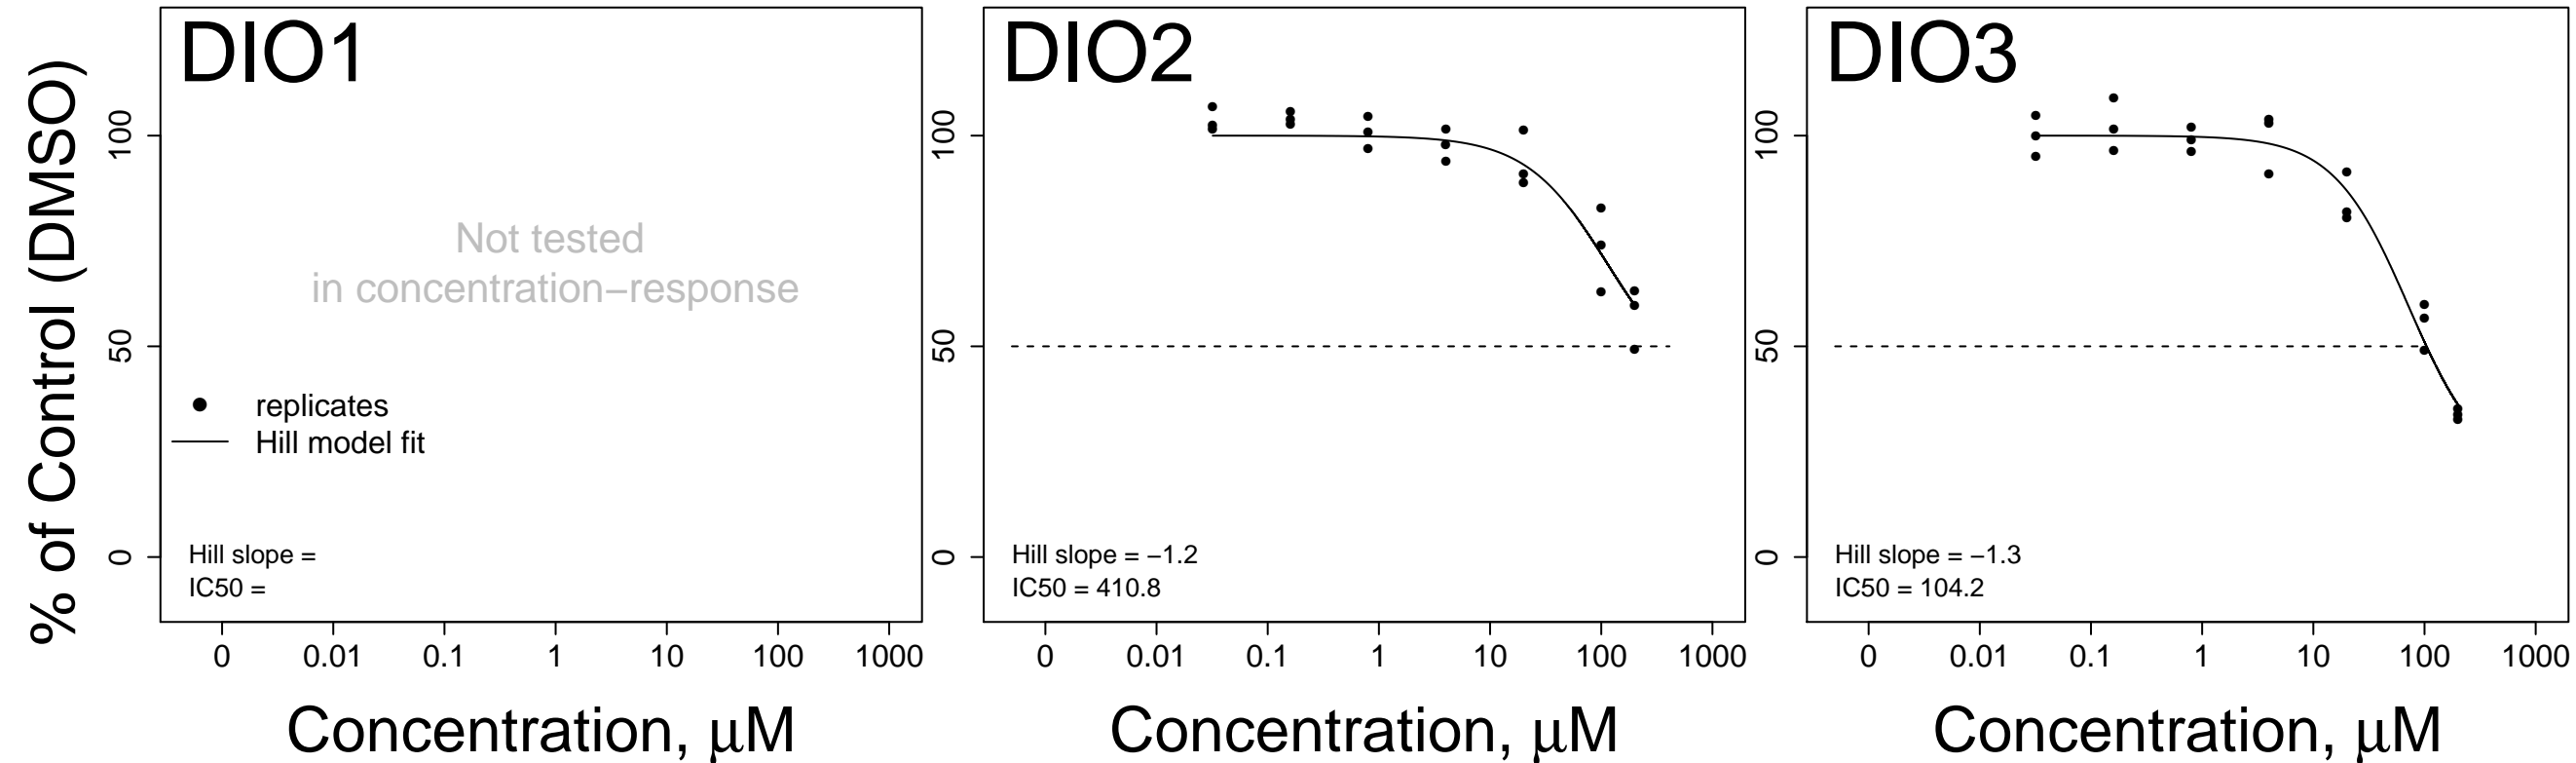

# 4-Nitrosodiphenylamine CASRN: 156-10-5

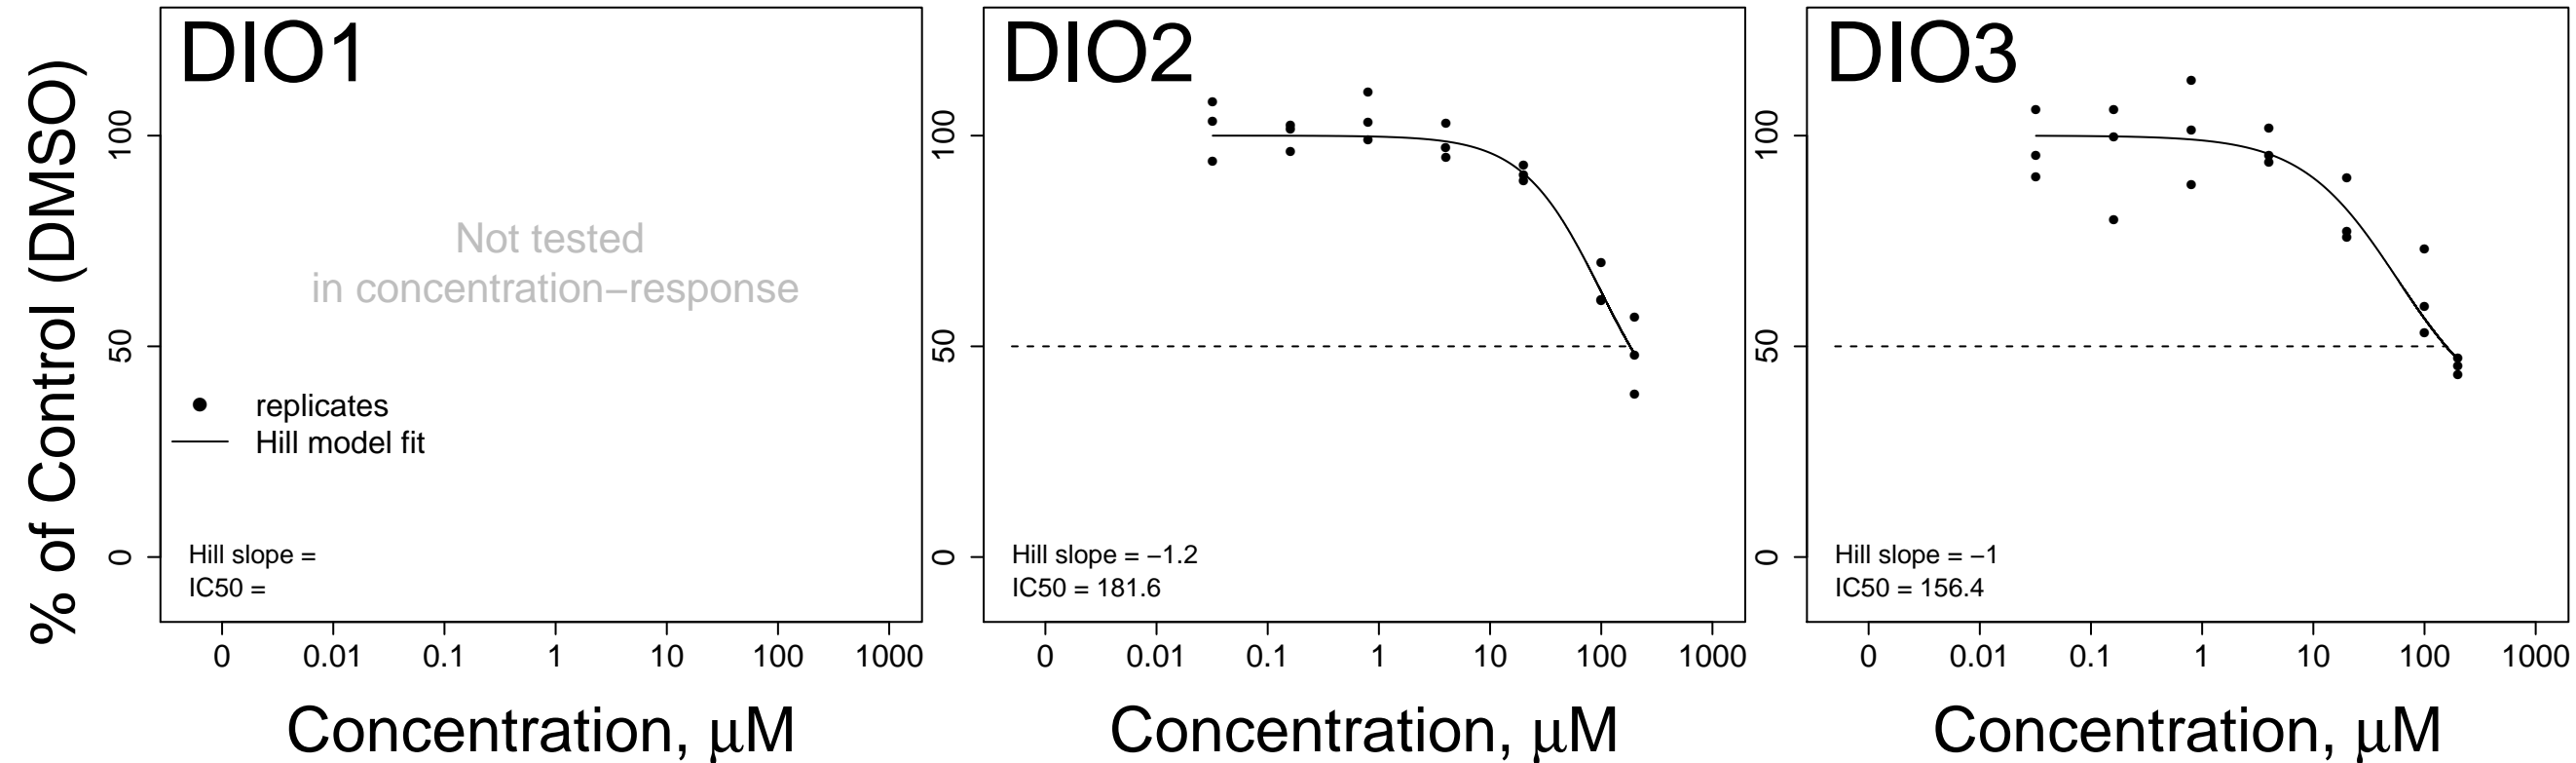

5-Ethylidene-2-norbornene CASRN: 16219-75-3

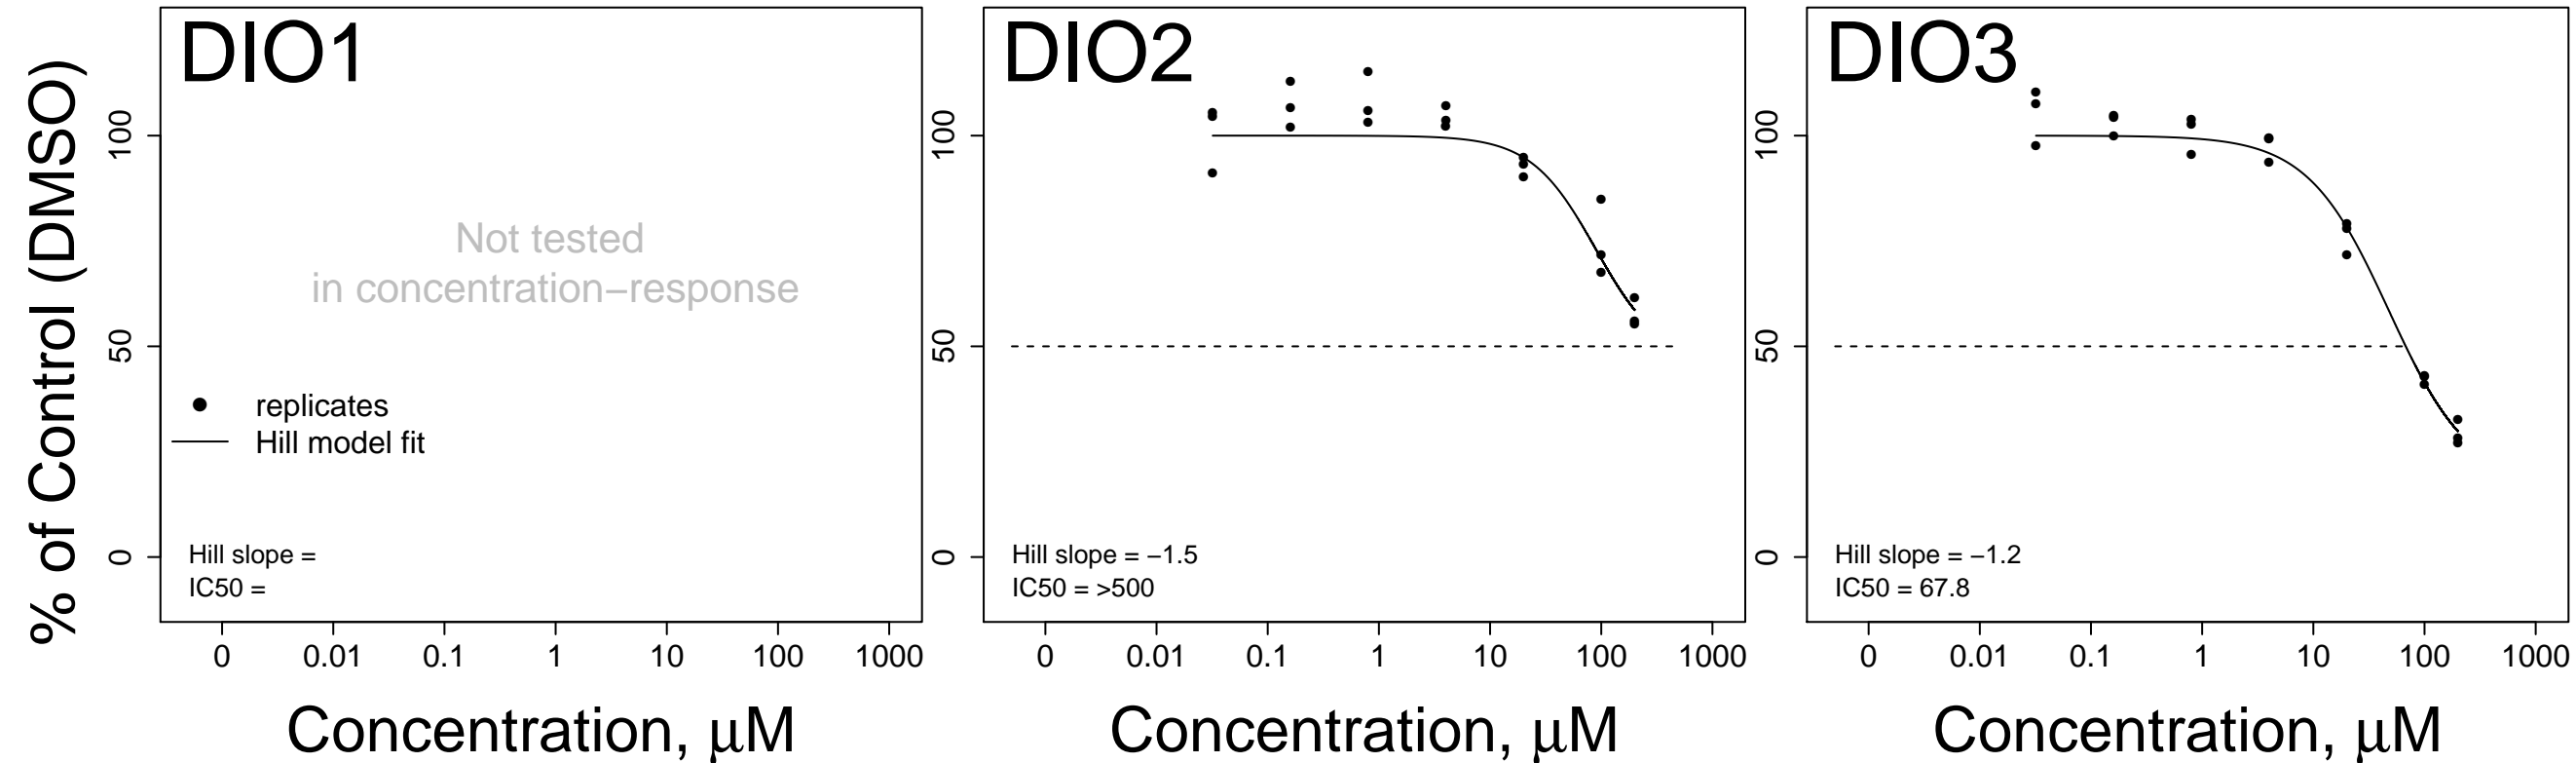

Bisphenol A diglycidyl ether CASRN: 1675-54-3

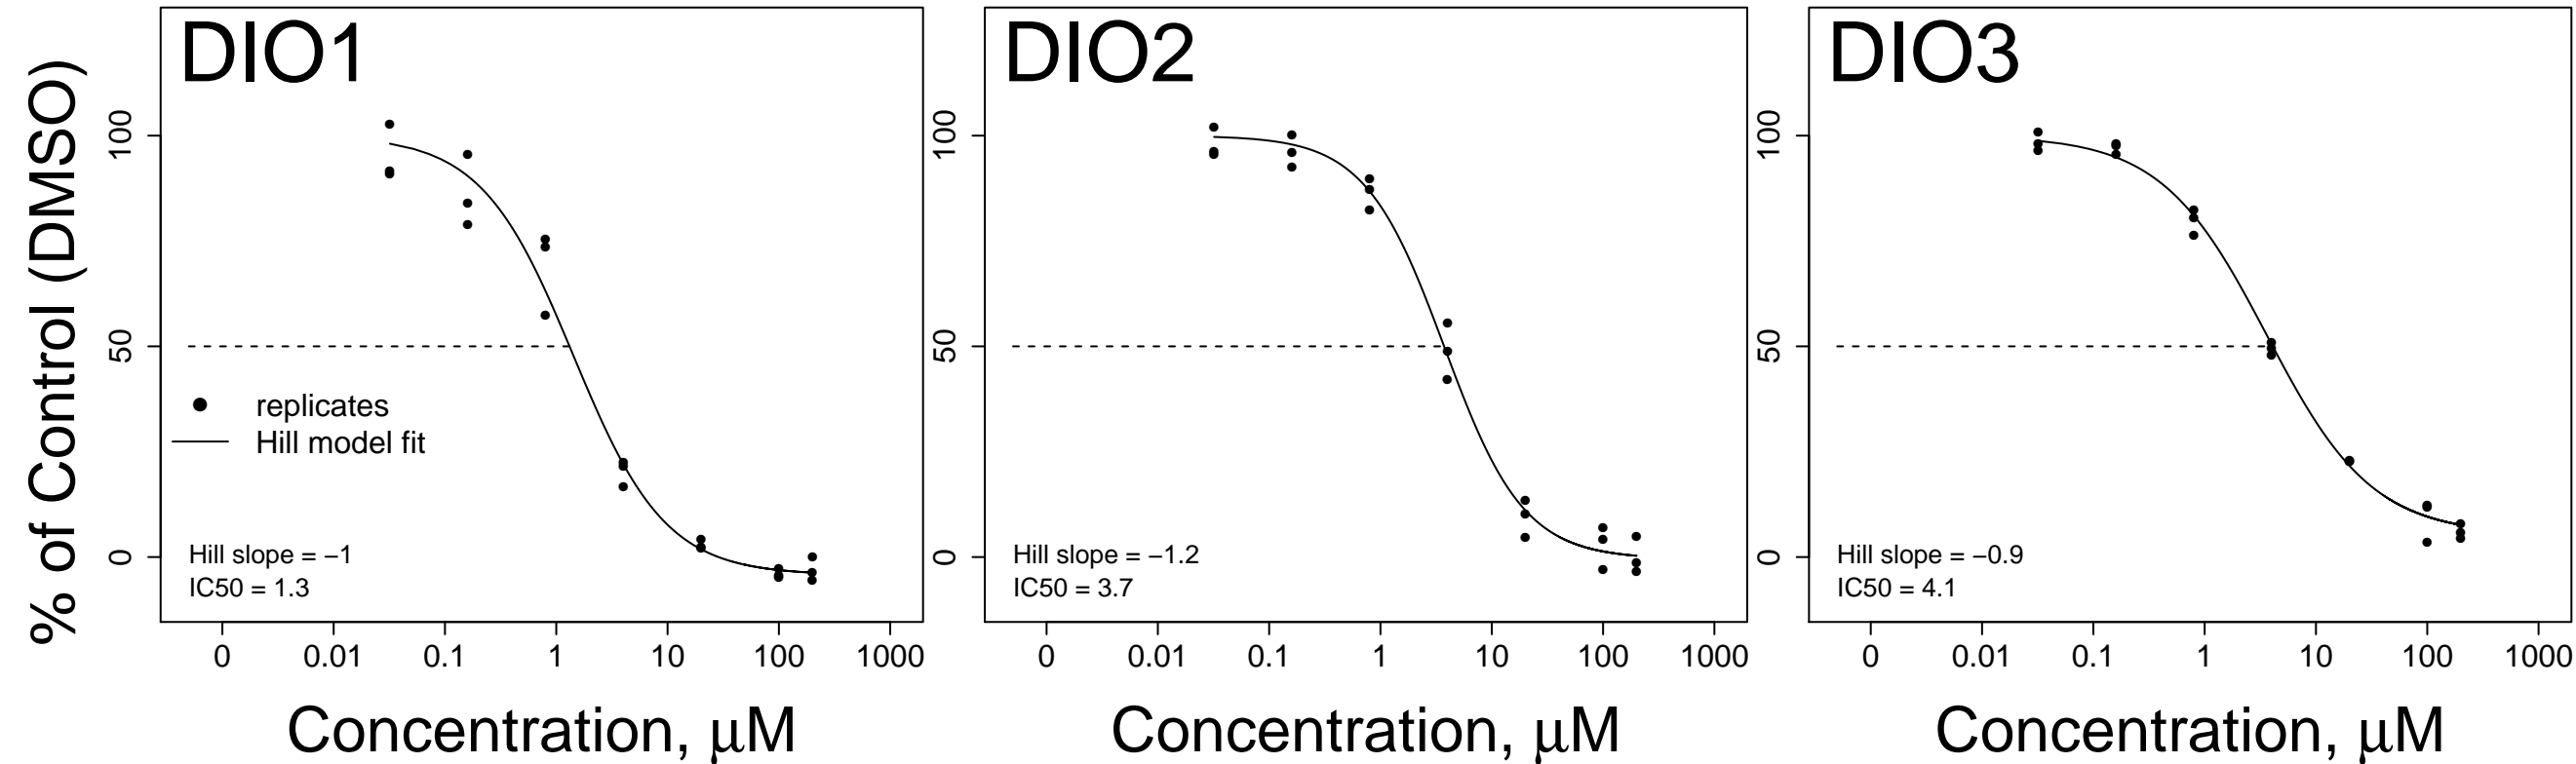

Phenylparaben CASRN: 17696-62-7

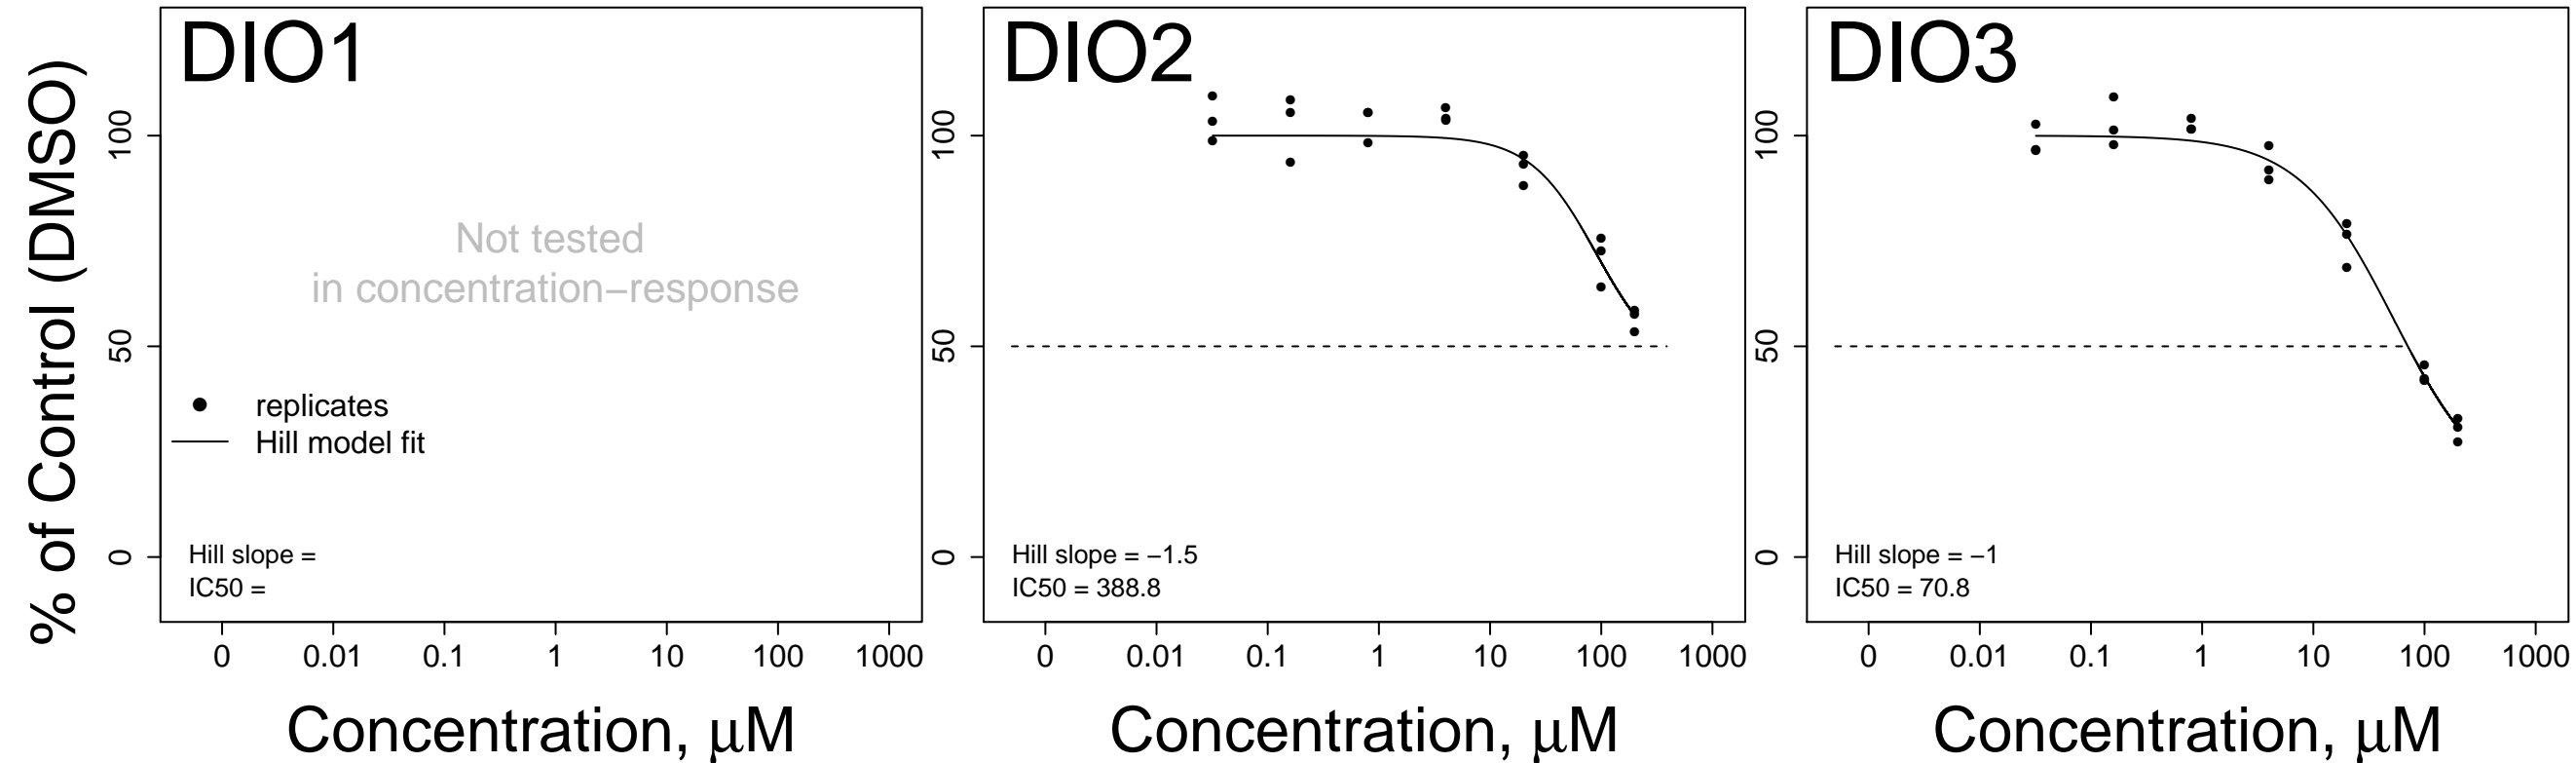



2,2'-(Tetradecylimino)diethanol CASRN: 18924-66-8

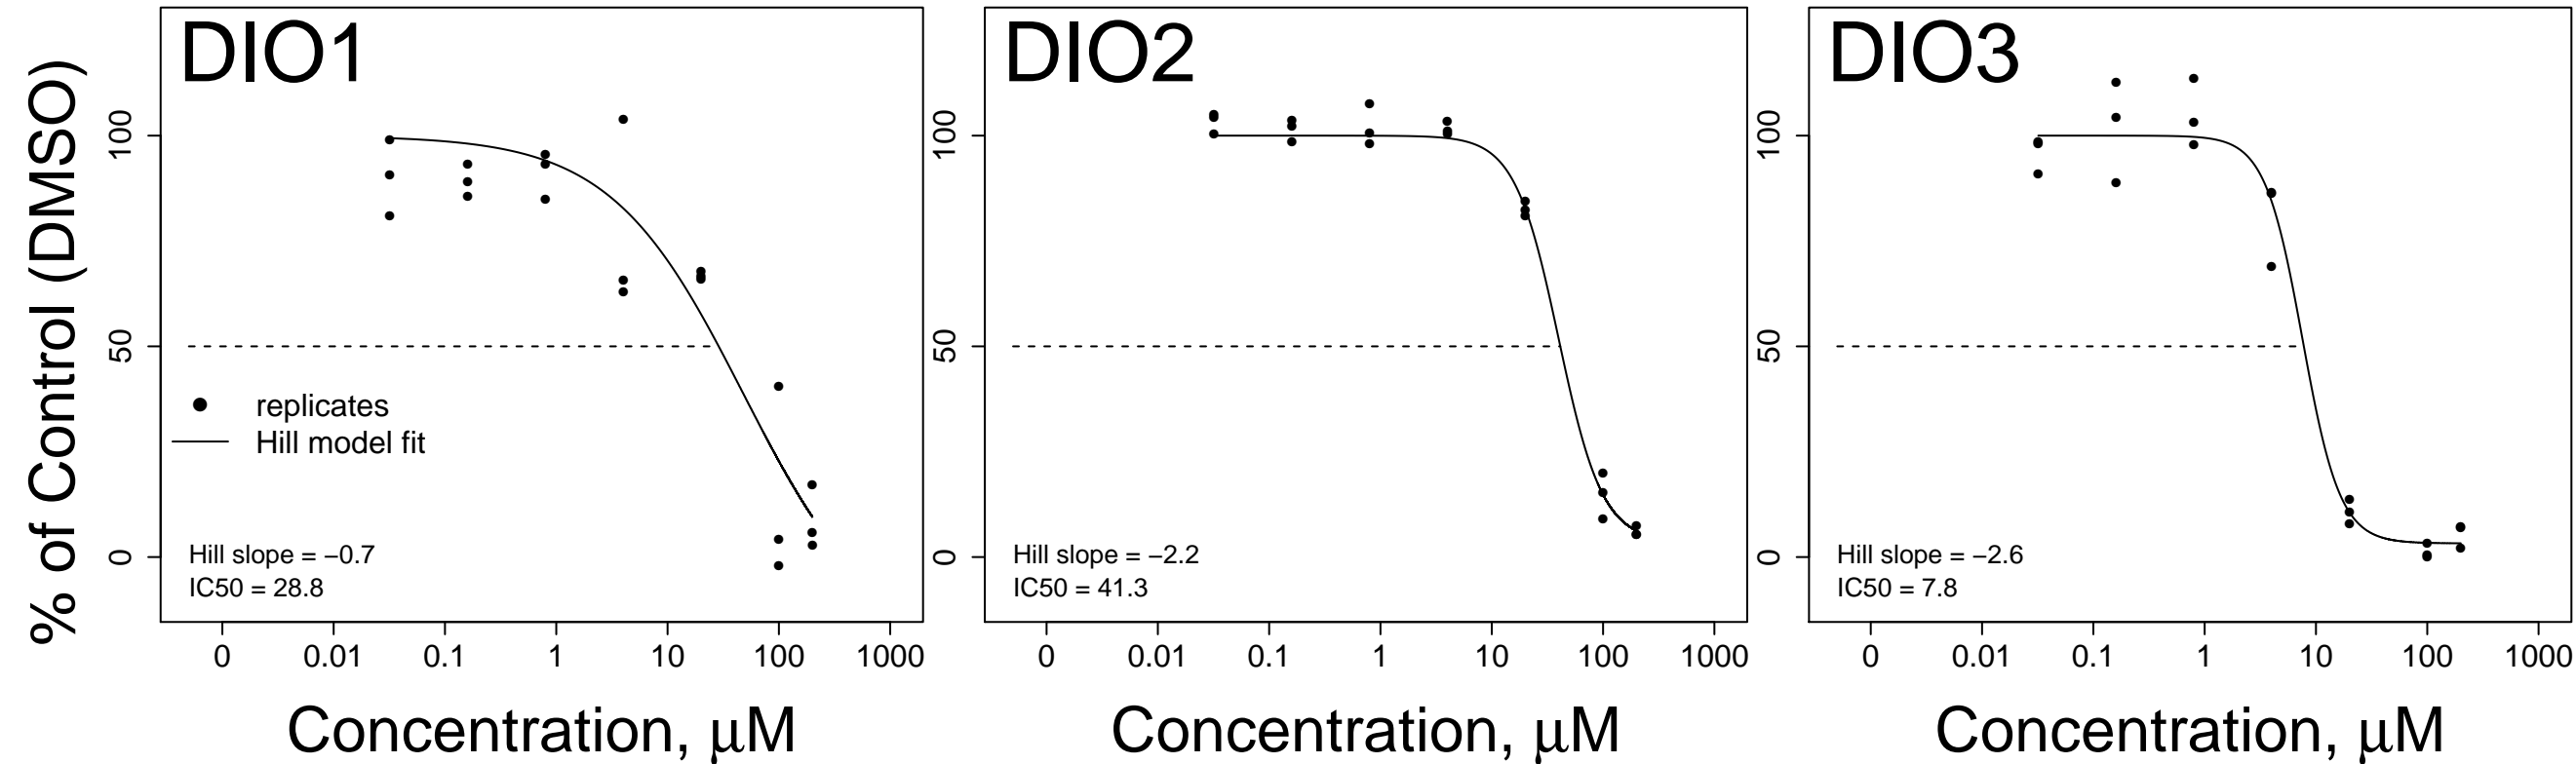

Propachlor CASRN: 1918-16-7

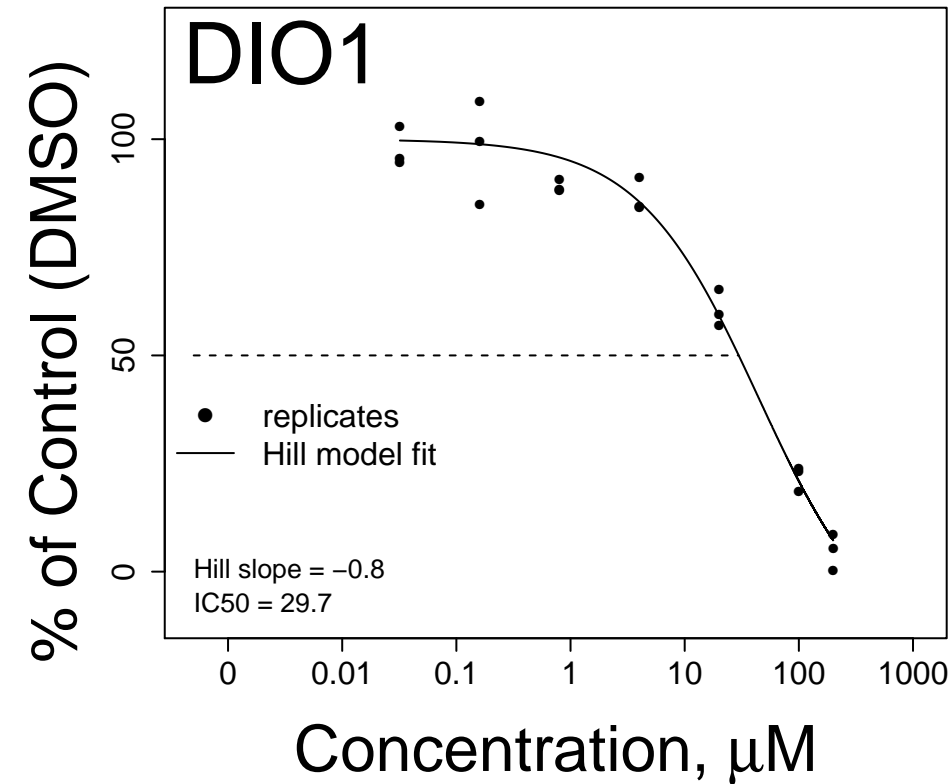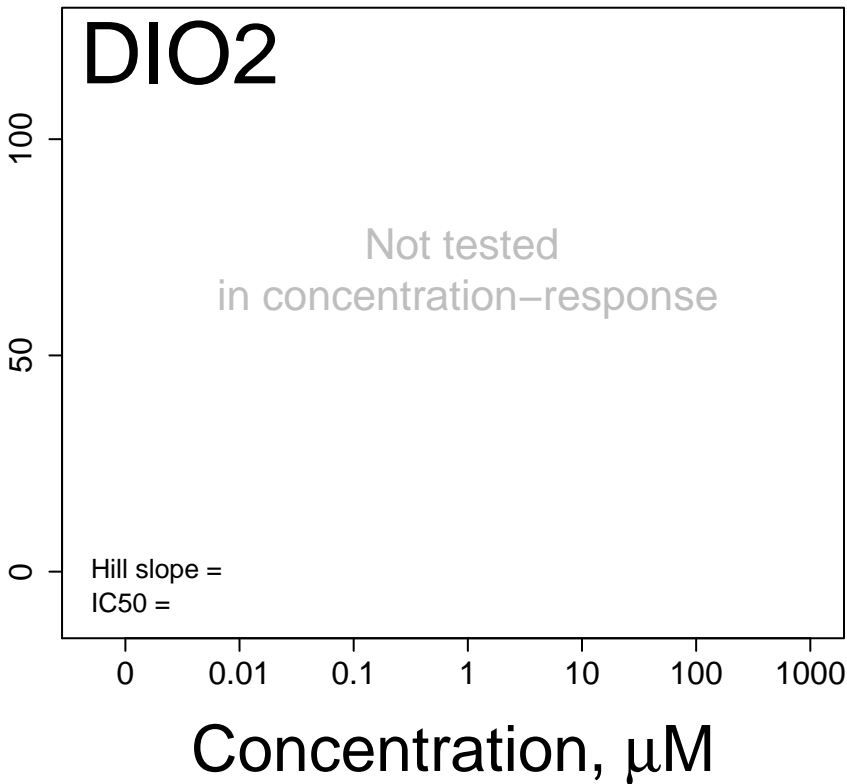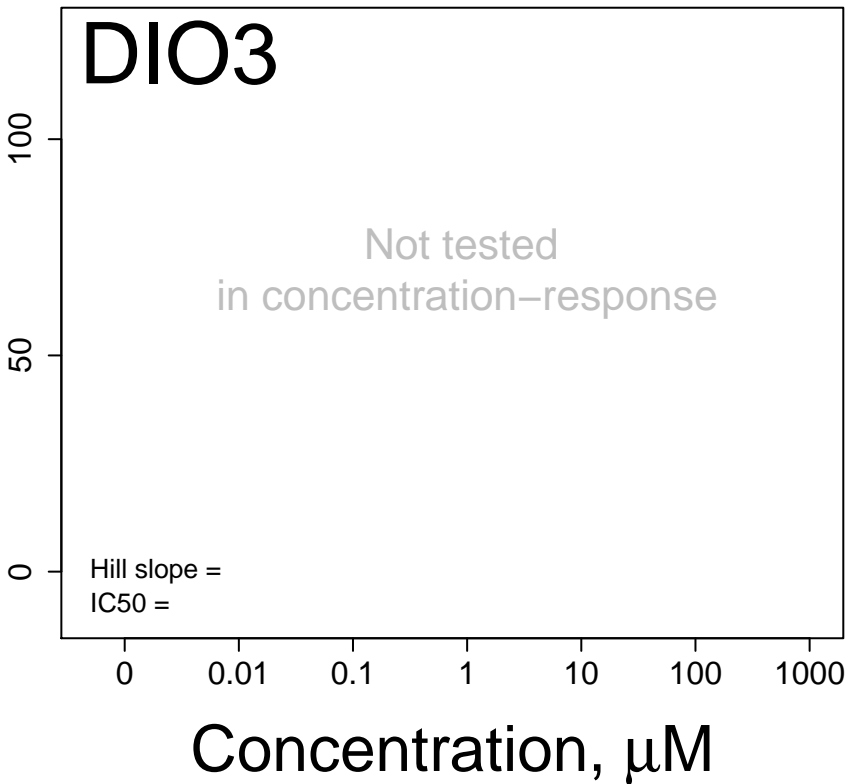

(2-Dodecenyl)succinic anhydride CASRN: 19780-11-1

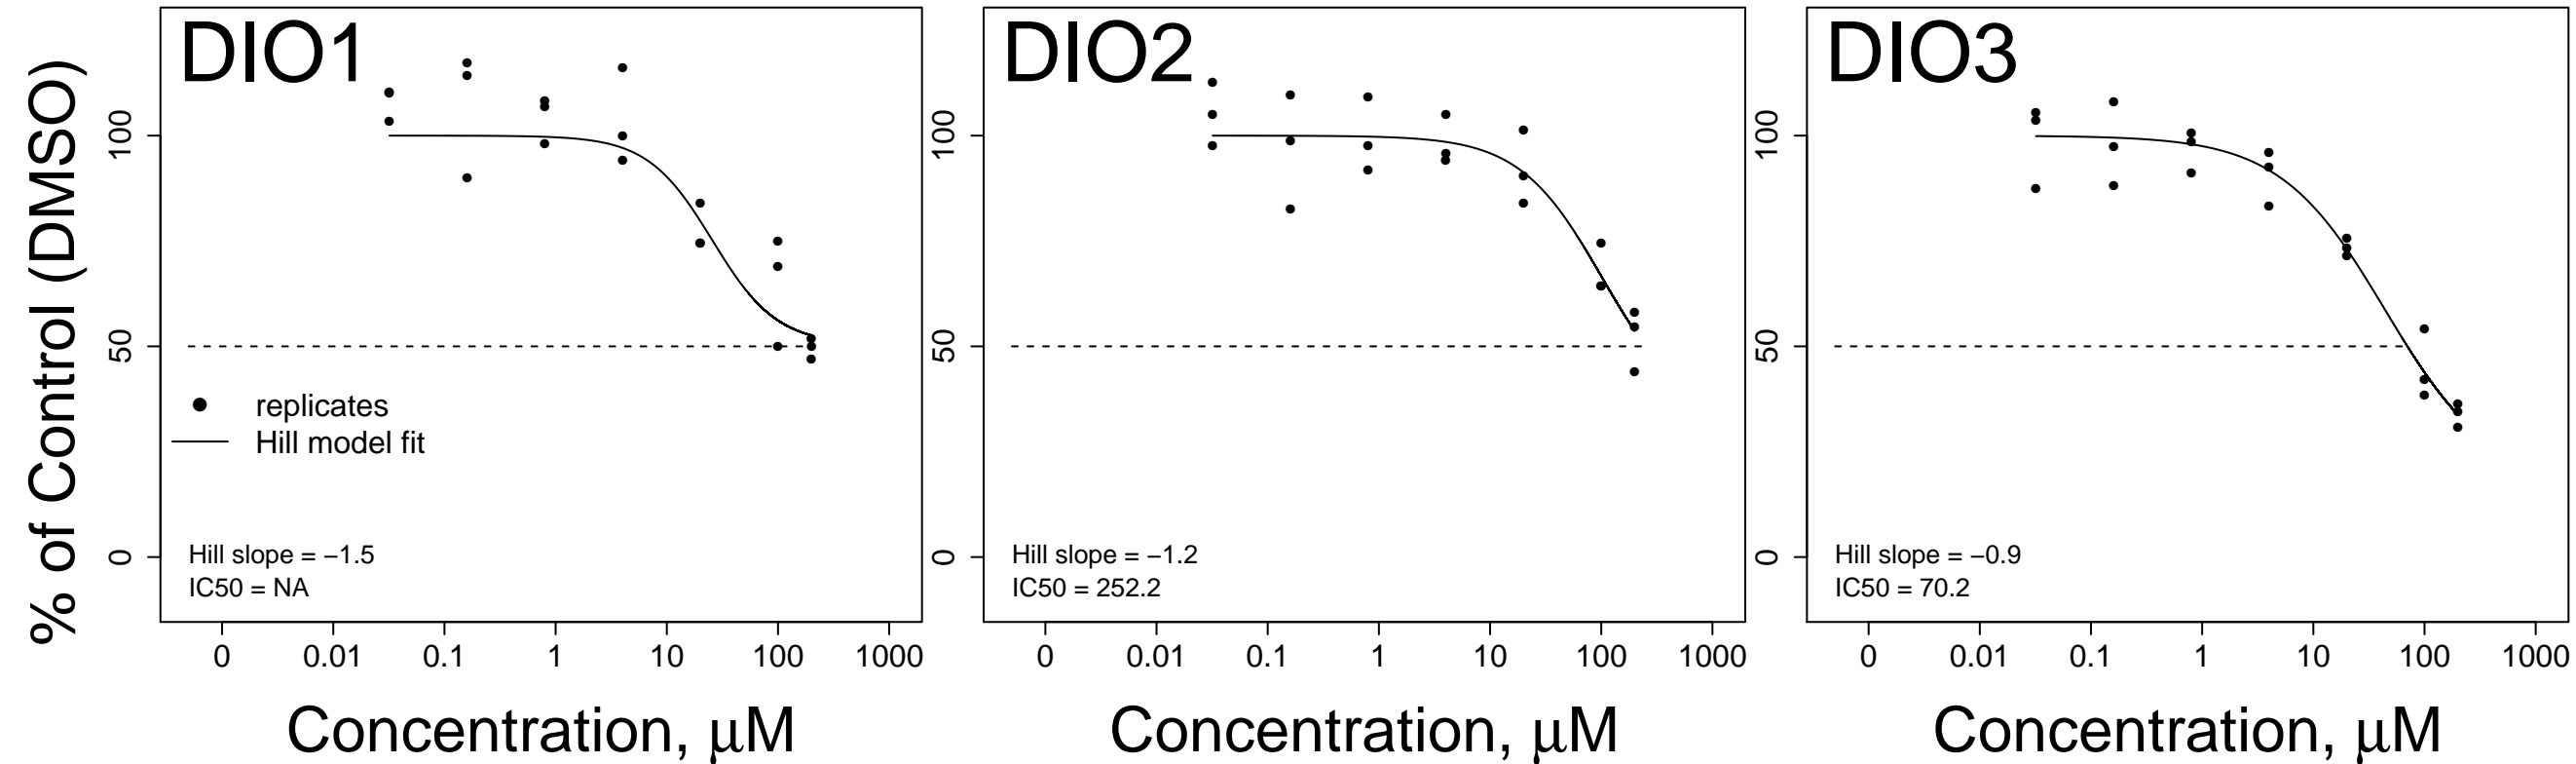

Z-Tetrachlorvinphos CASRN: 22248-79-9

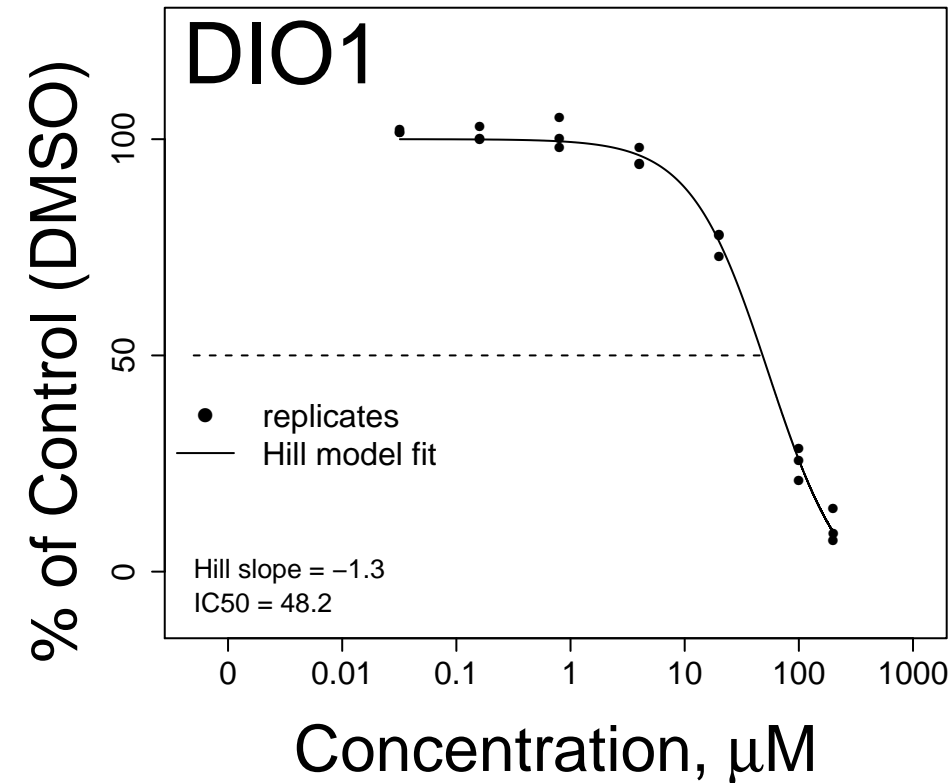

FD&C Green No. 3 CASRN: 2353-45-9

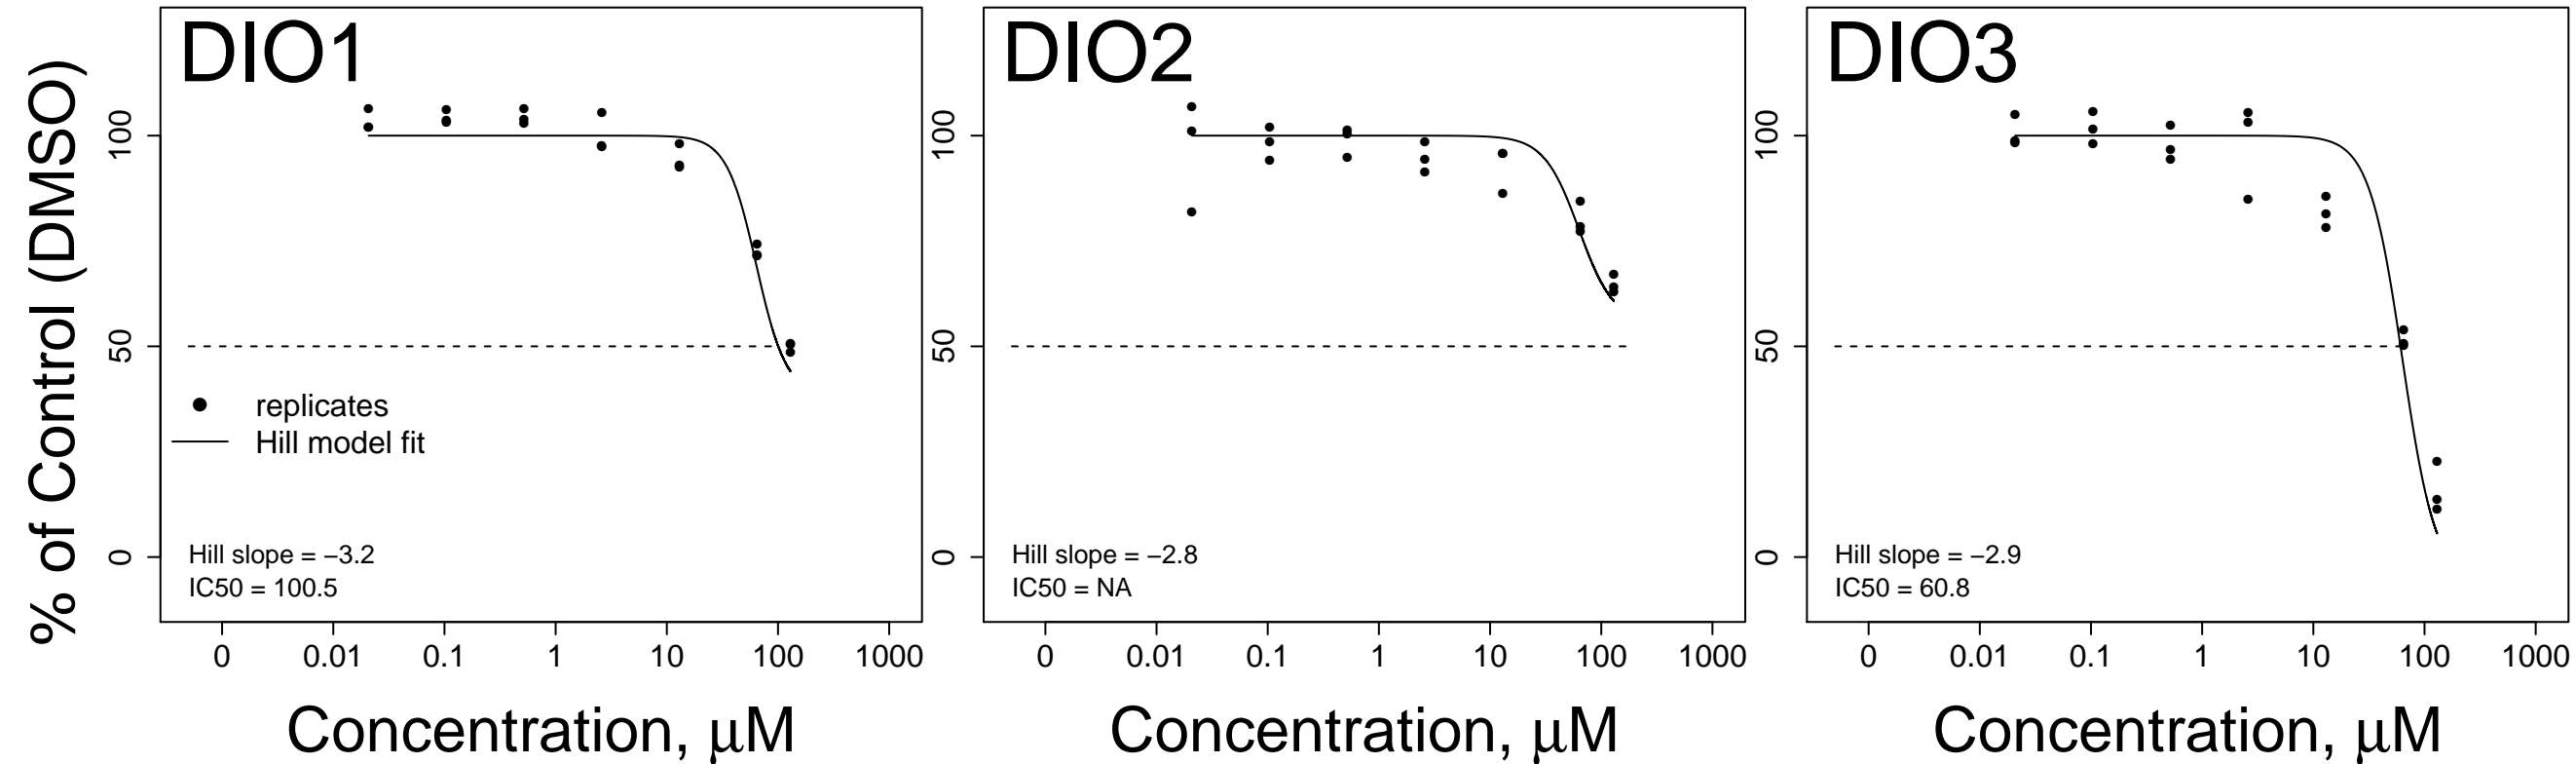

# Basic Blue 7 CASRN: 2390-60-5

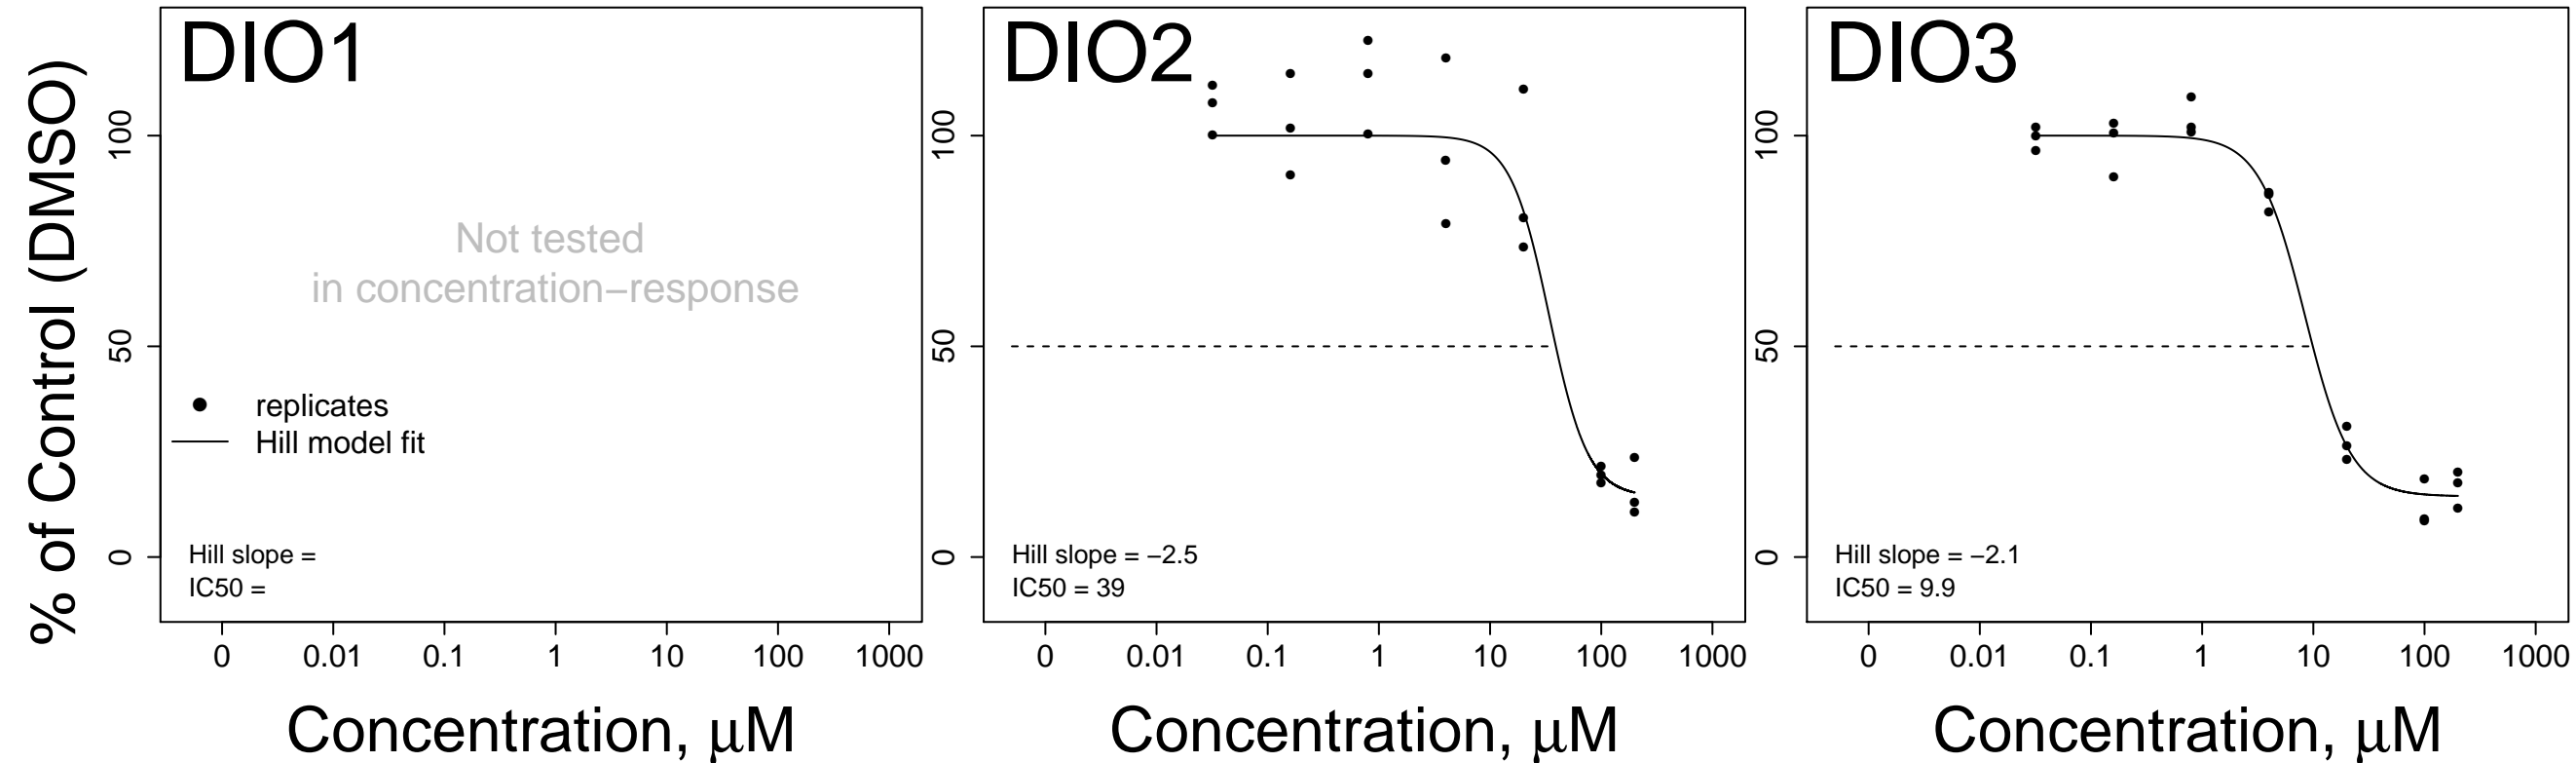

4-tert-Butylbenzenethiol CASRN: 2396-68-1

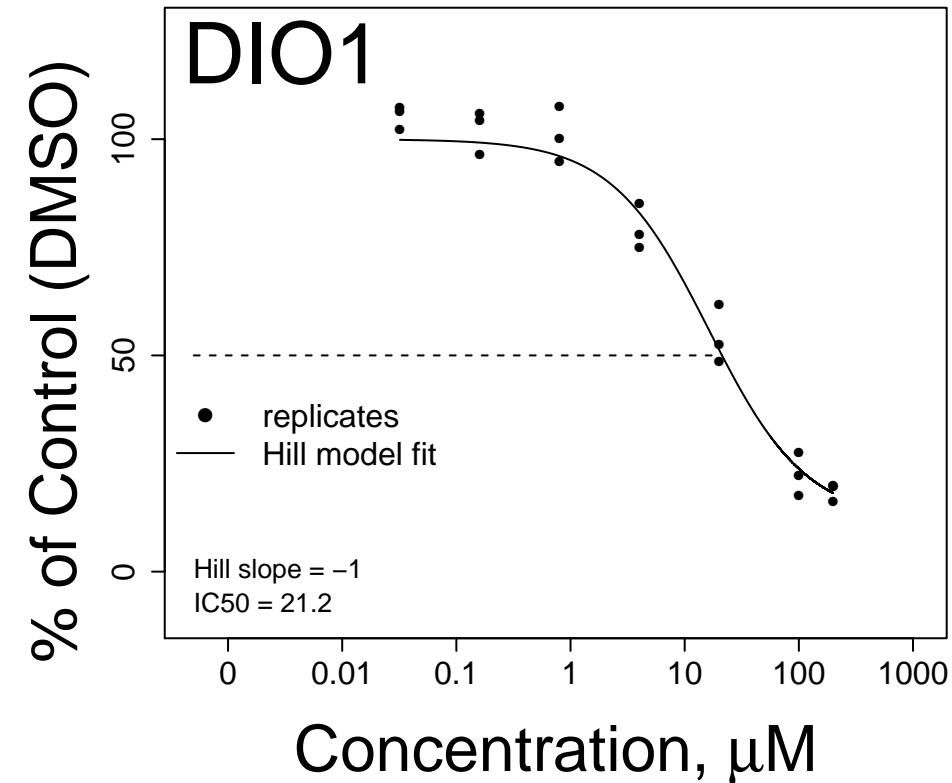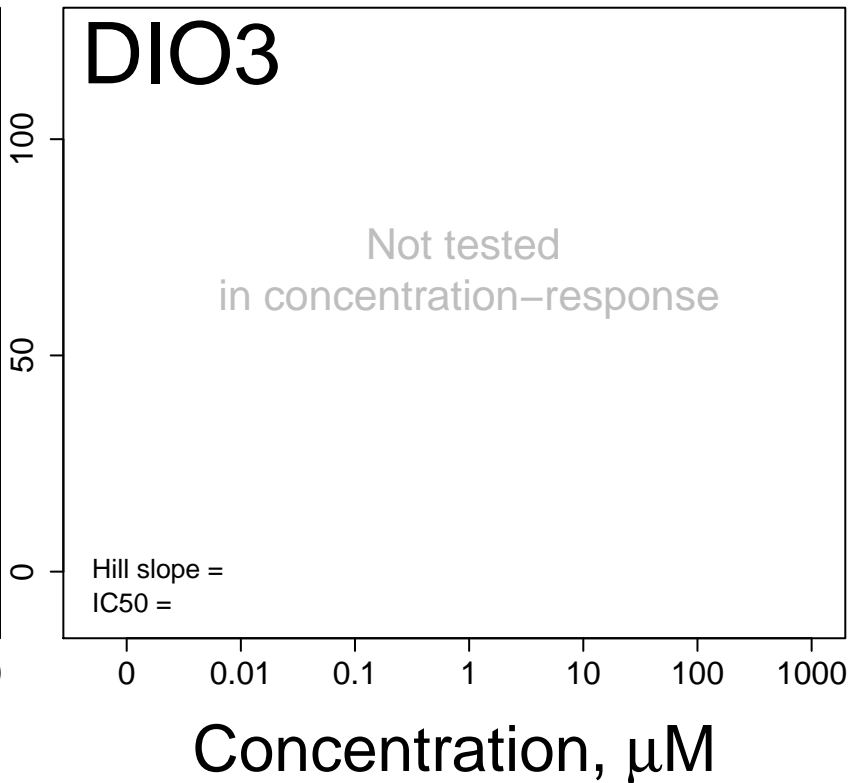

Econazole nitrate CASRN: 24169-02-6

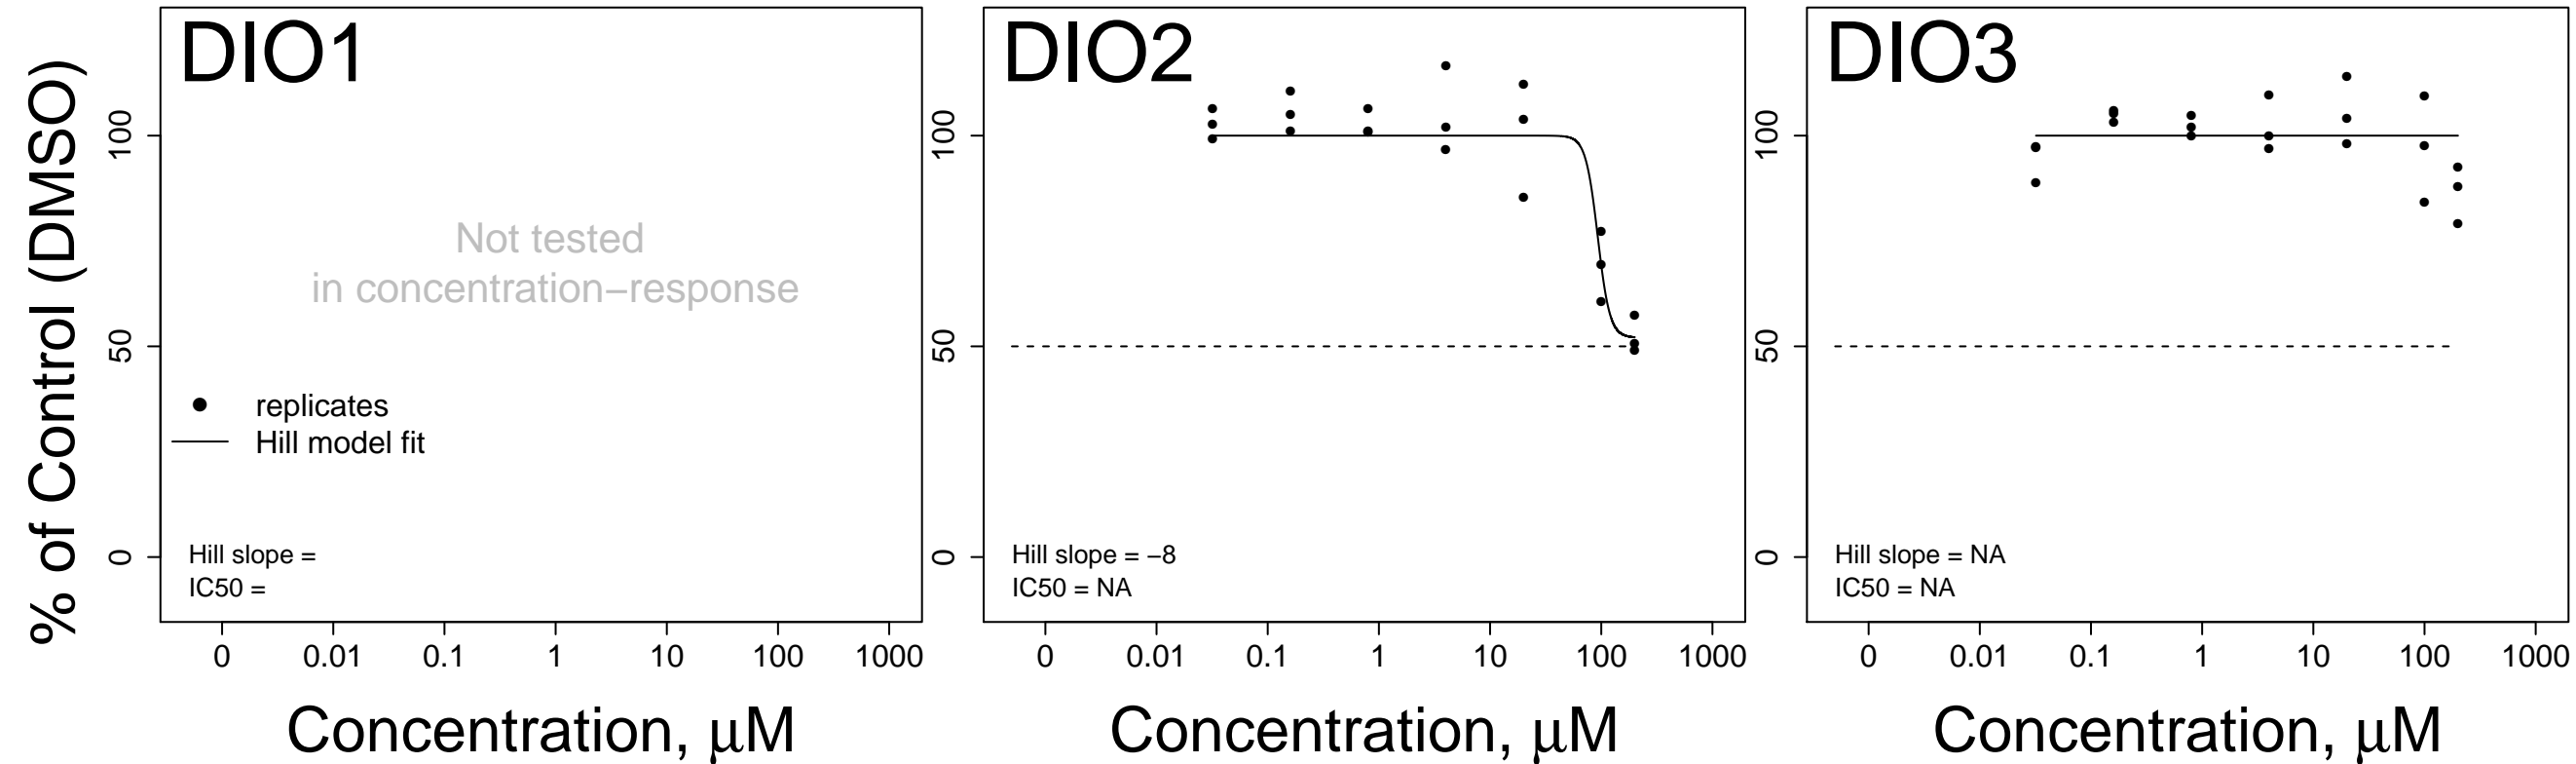



# Sodium 2-mercaptobenzothiolate CASRN: 2492-26-4

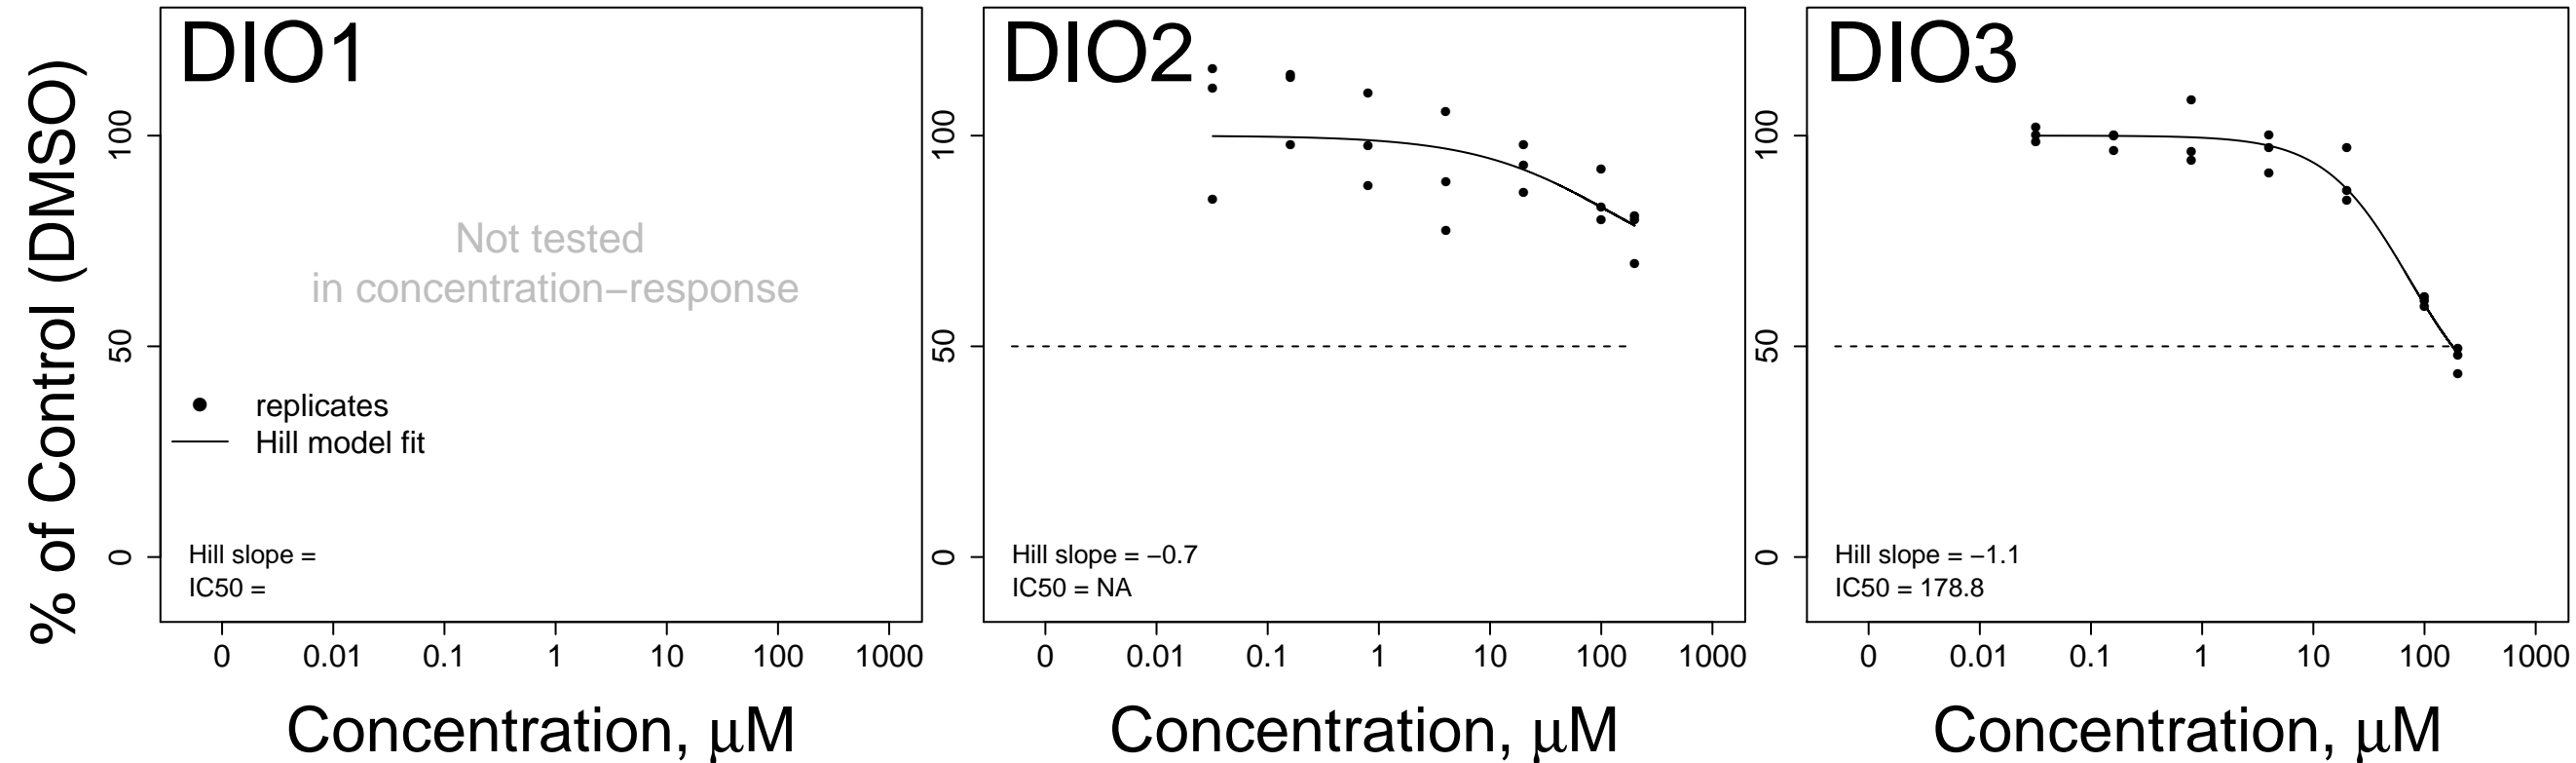

Methylbenzethonium chloride CASRN: 25155-18-4

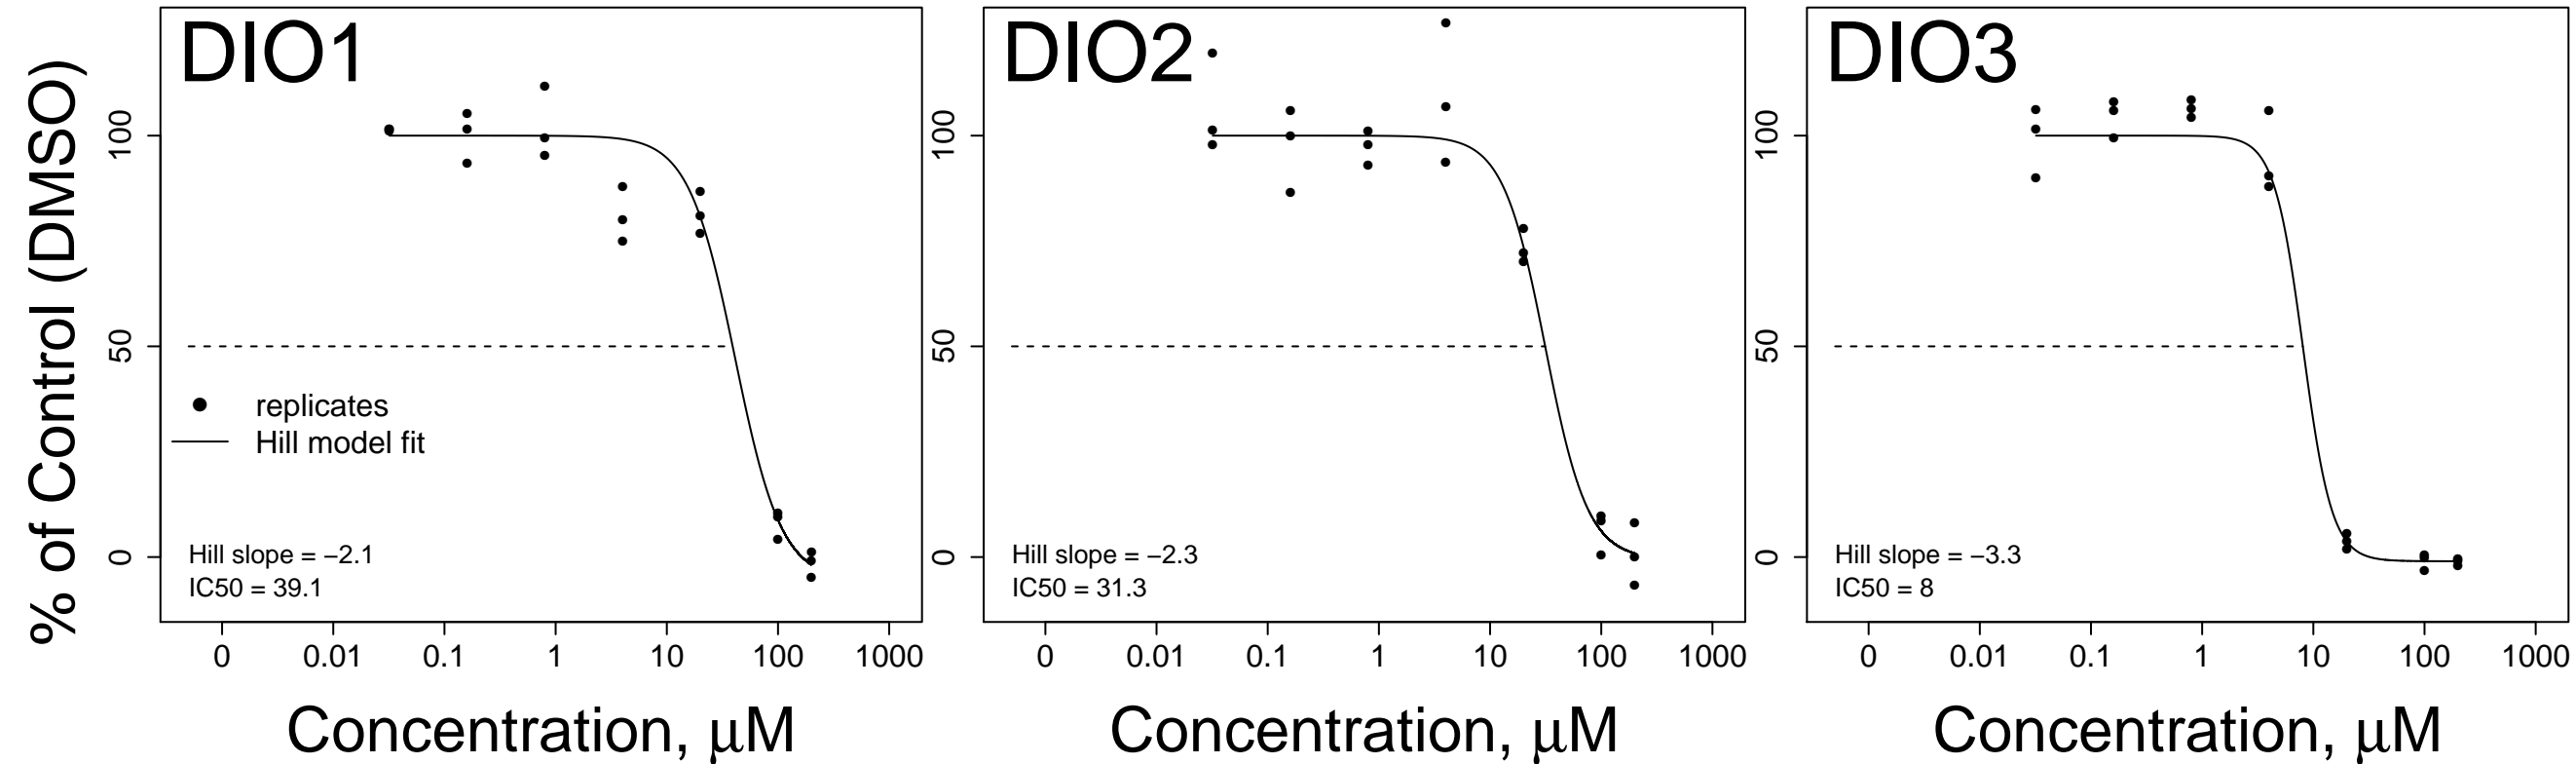

# Glycerol monooleate CASRN: 25496-72-4

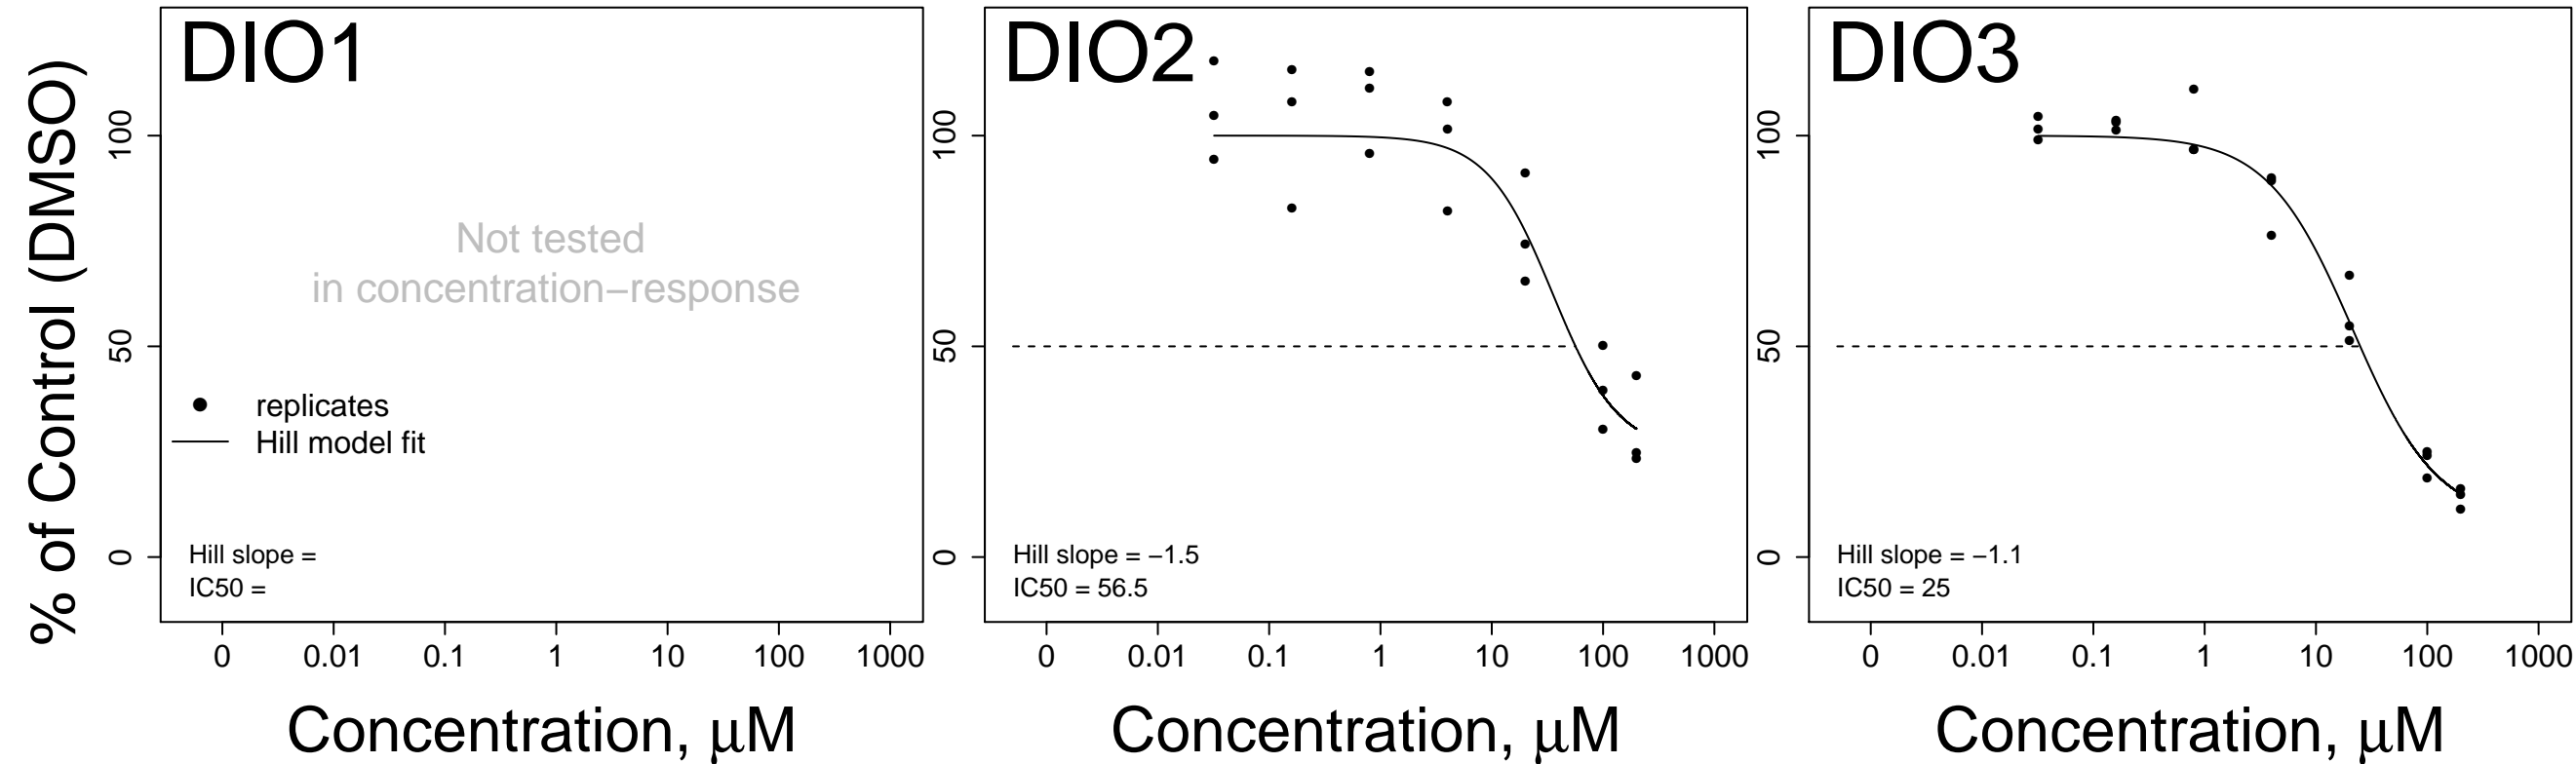

Calcium dodecylbenzene sulfonate CASRN: 26264-06-2

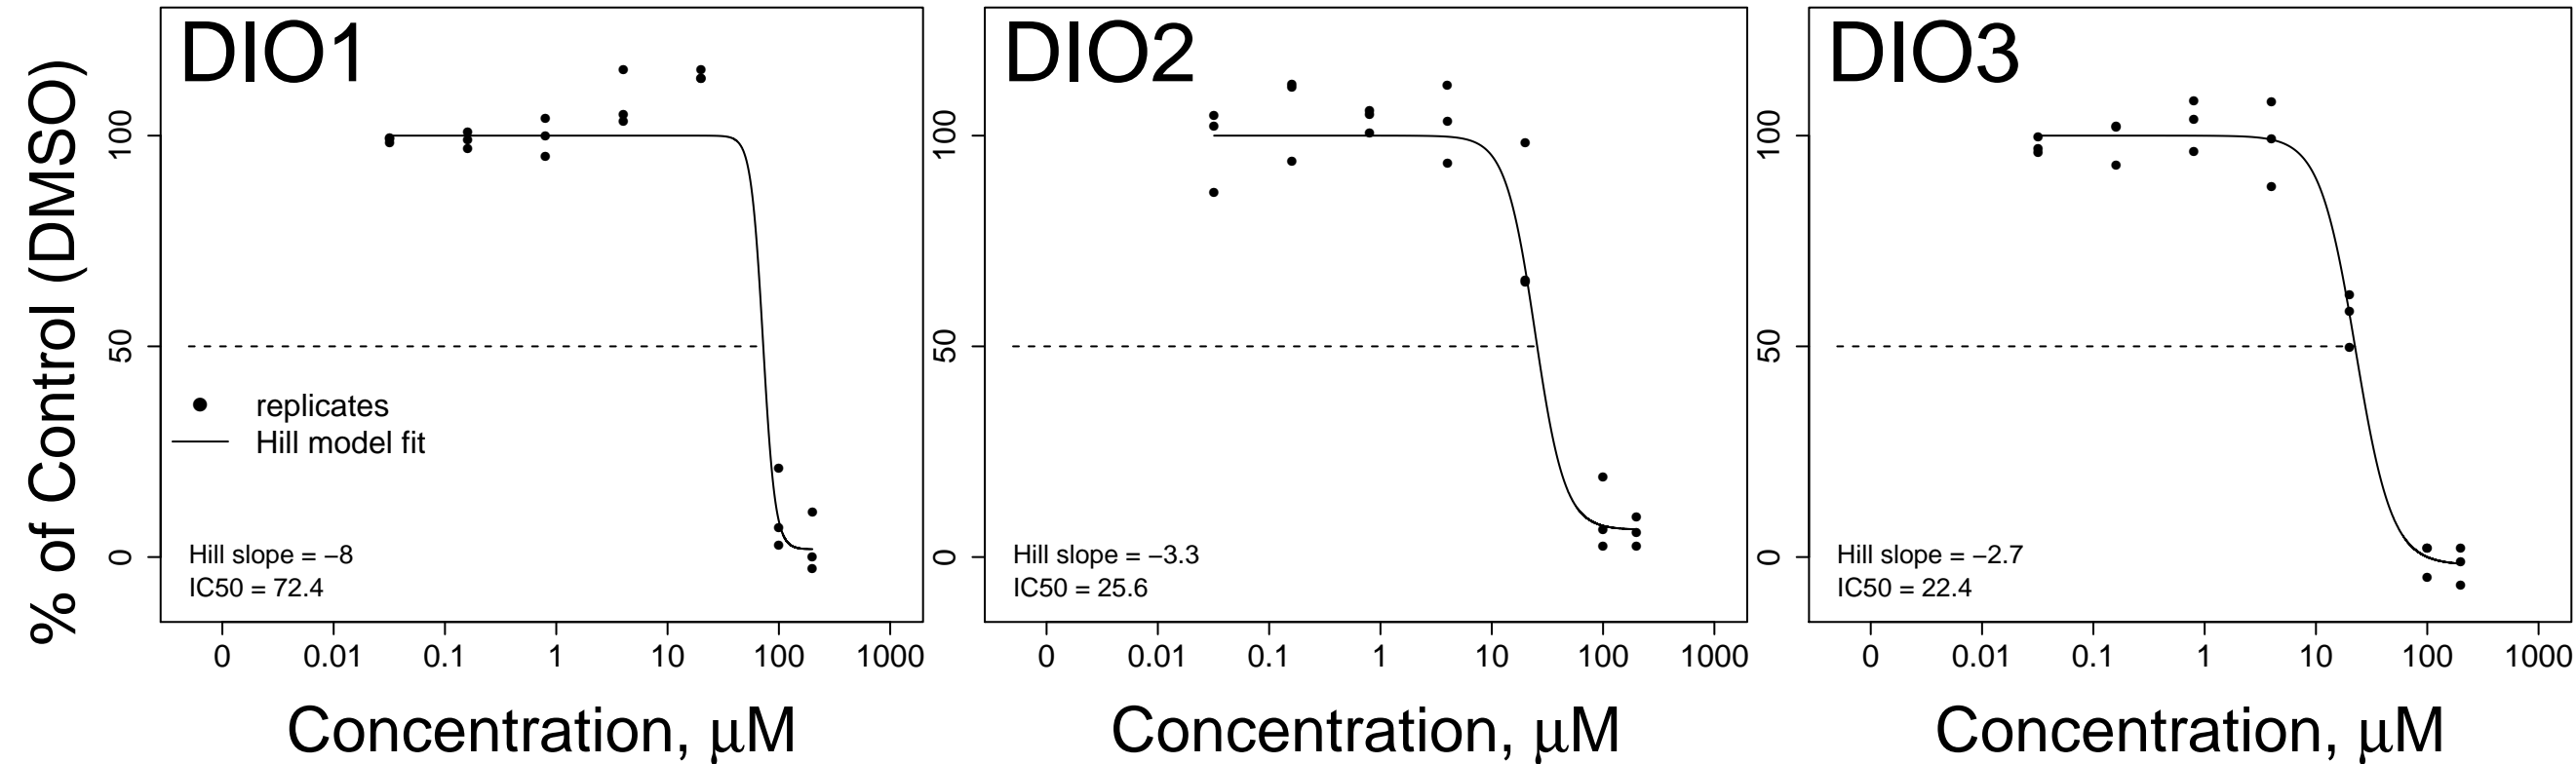

Dodecylphenol CASRN: 27193-86-8

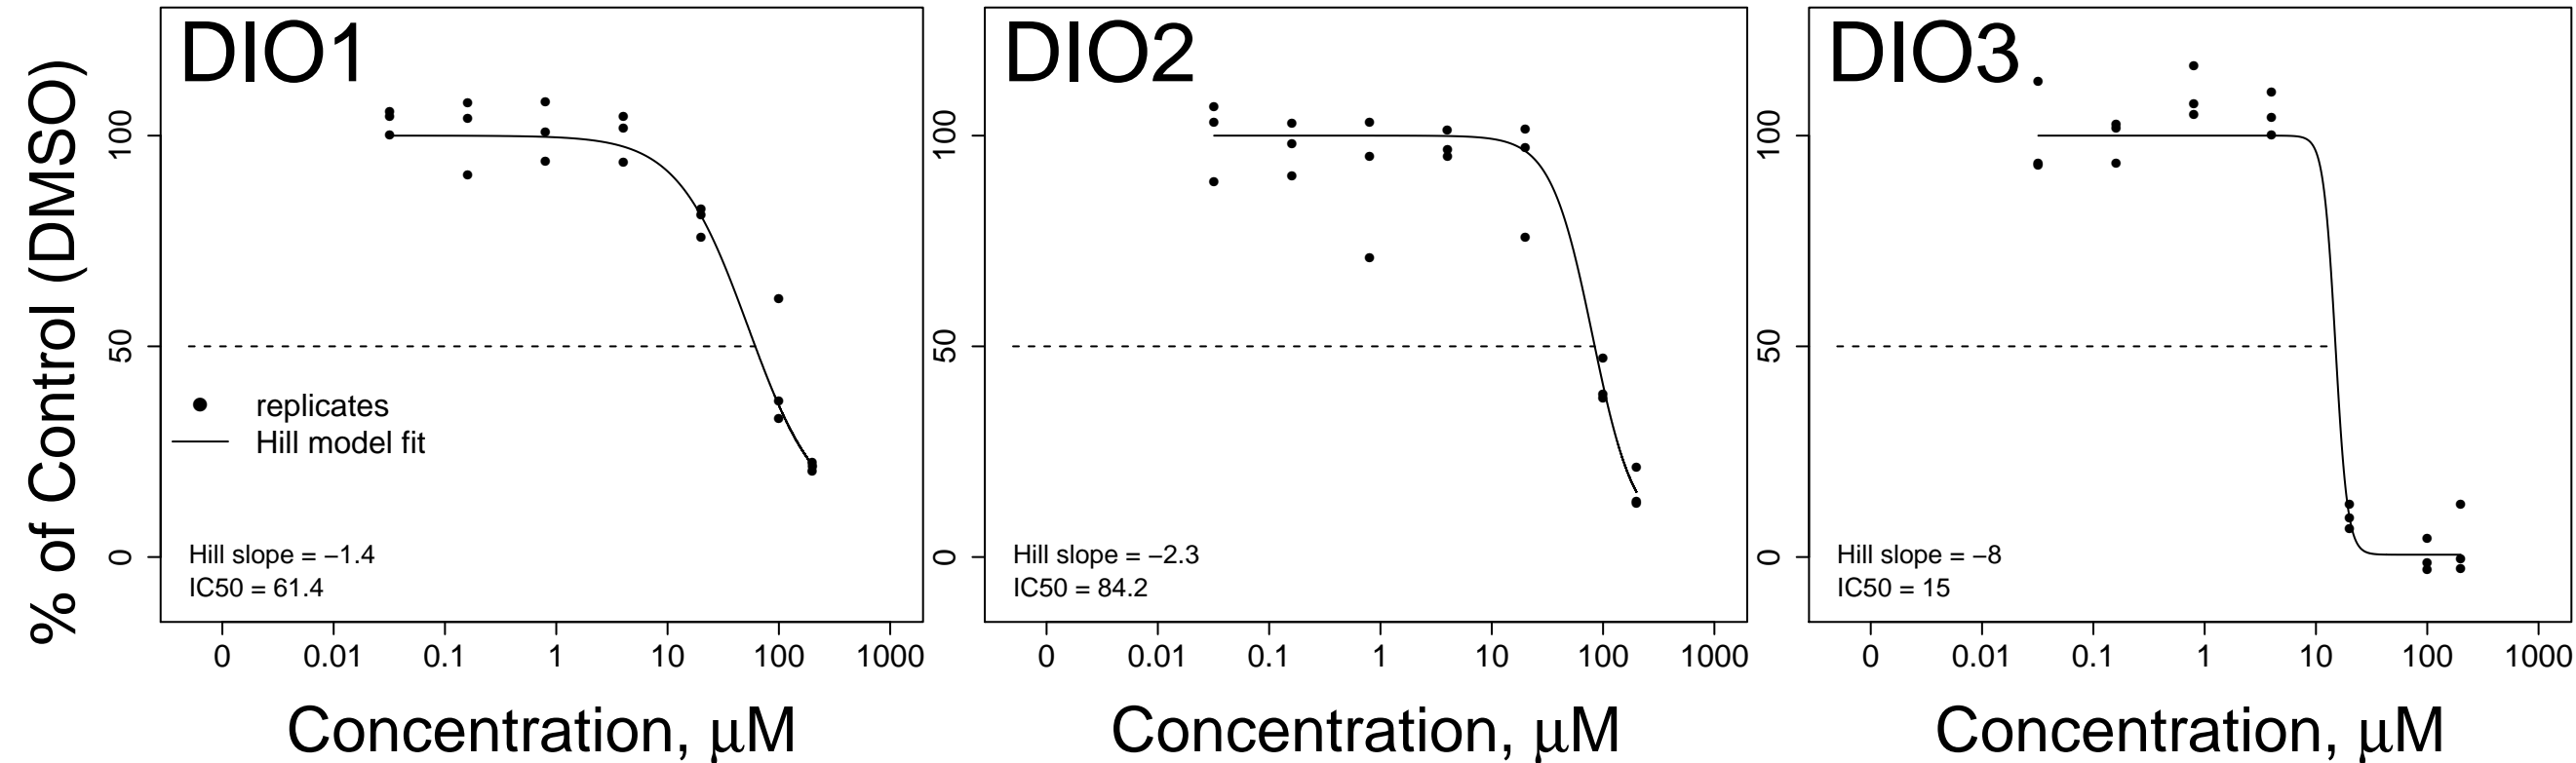

Disodium 4,4'-bis(2-sulfostyryl)biphenyl CASRN: 27344-41-8

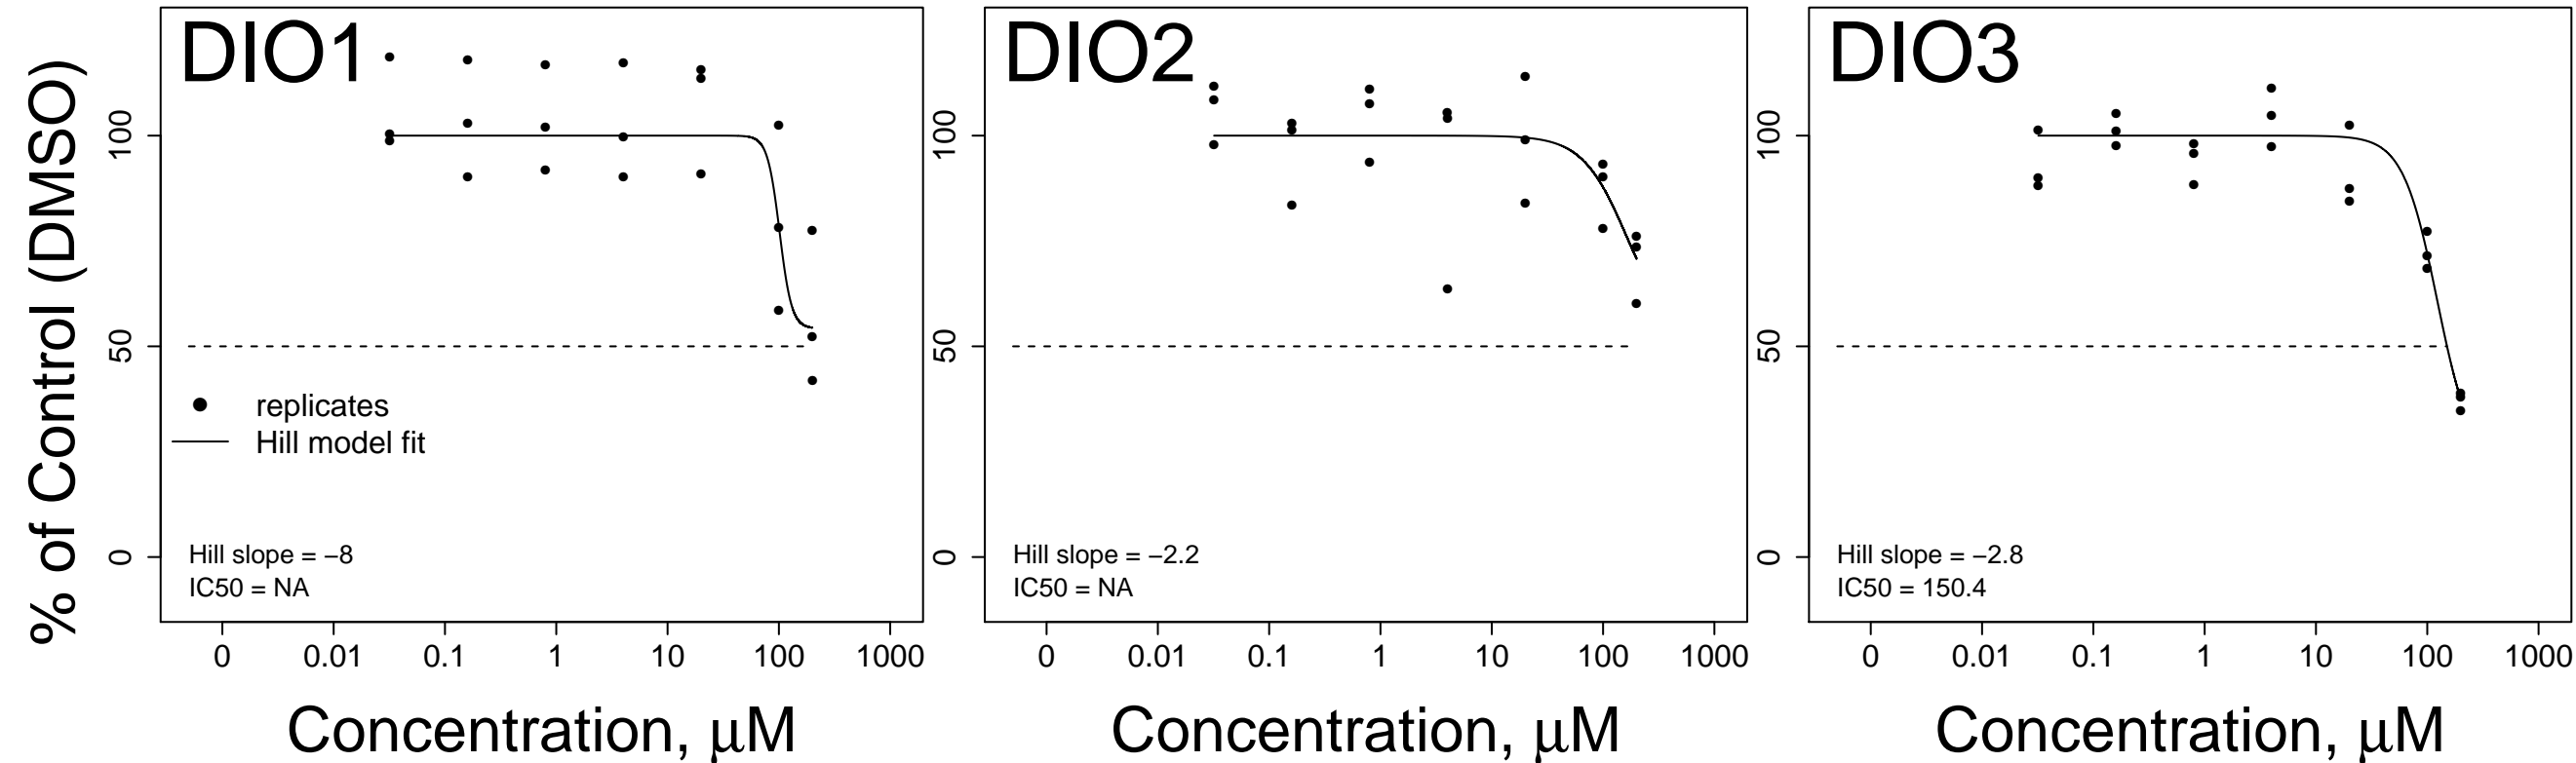

# C.I. Direct Yellow 12 CASRN: 2870-32-8

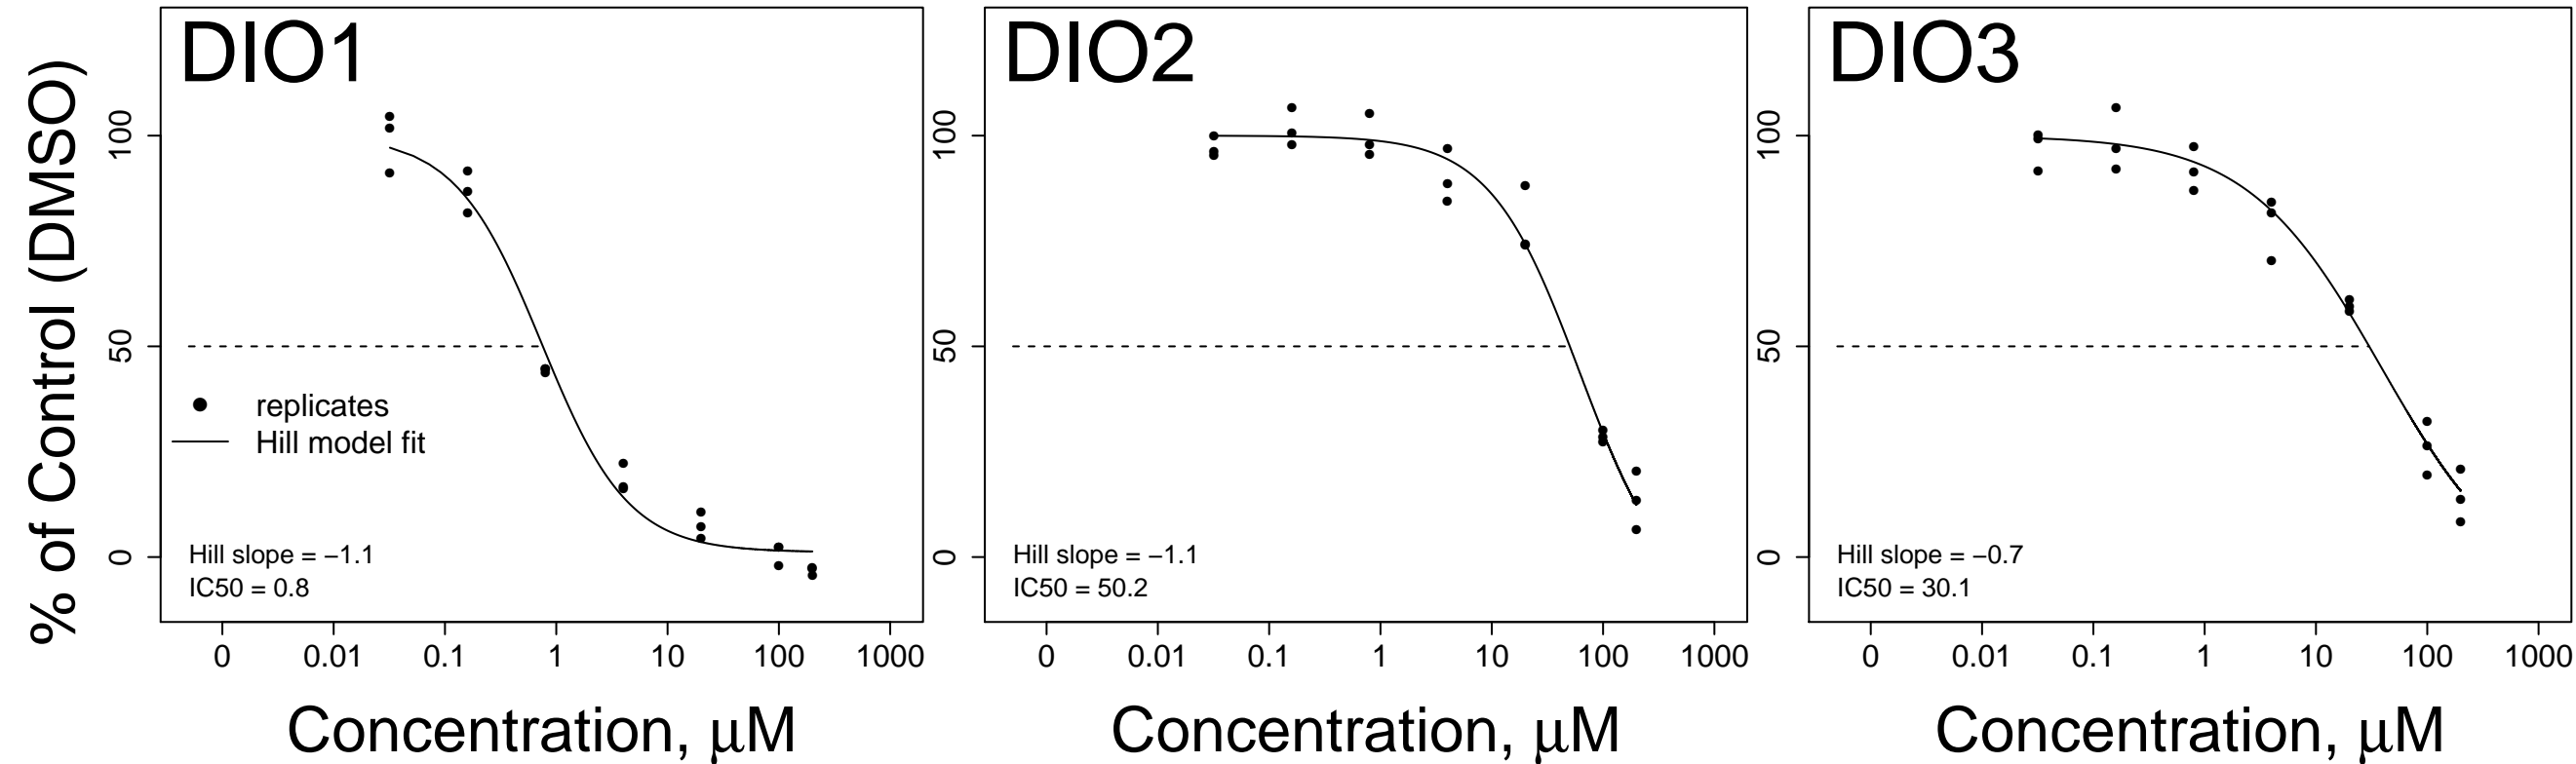

Ethyl (2E,4Z)-deca-2,4-dienoate CASRN: 3025-30-7

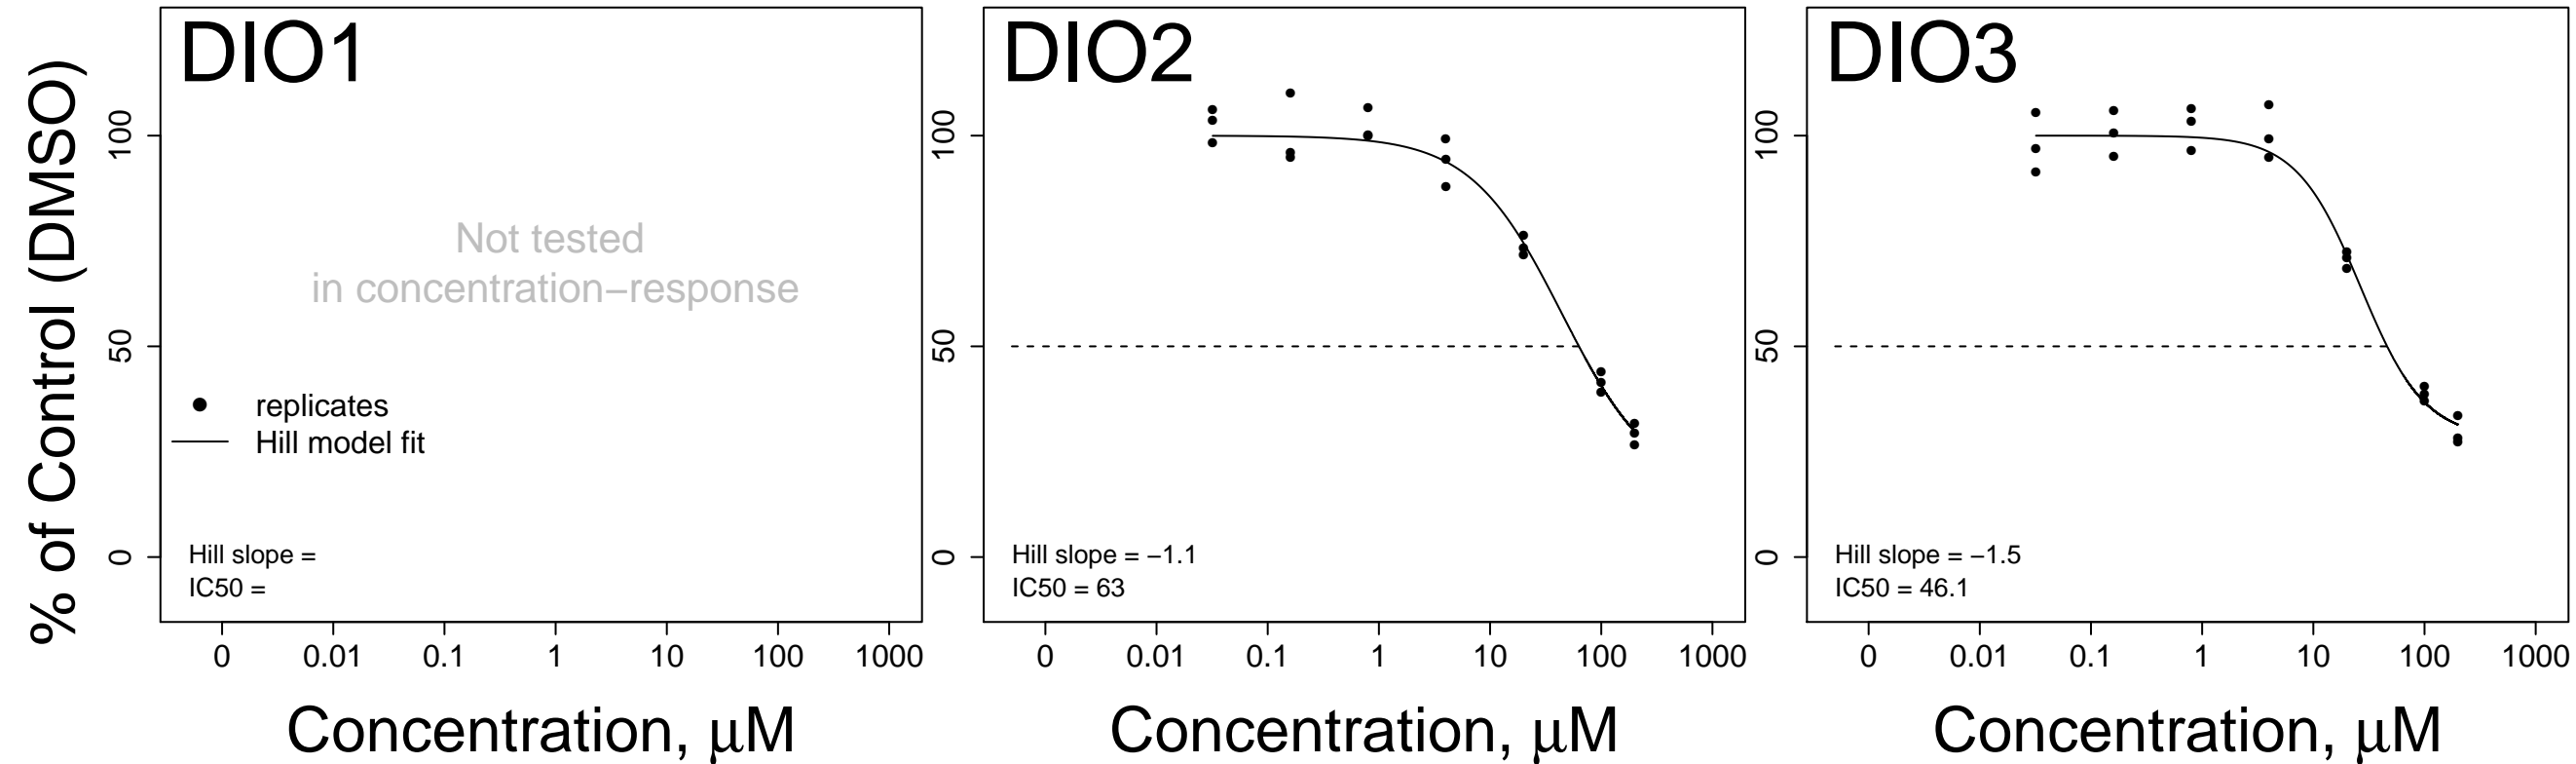



Isooctadecanoic acid CASRN: 30399-84-9

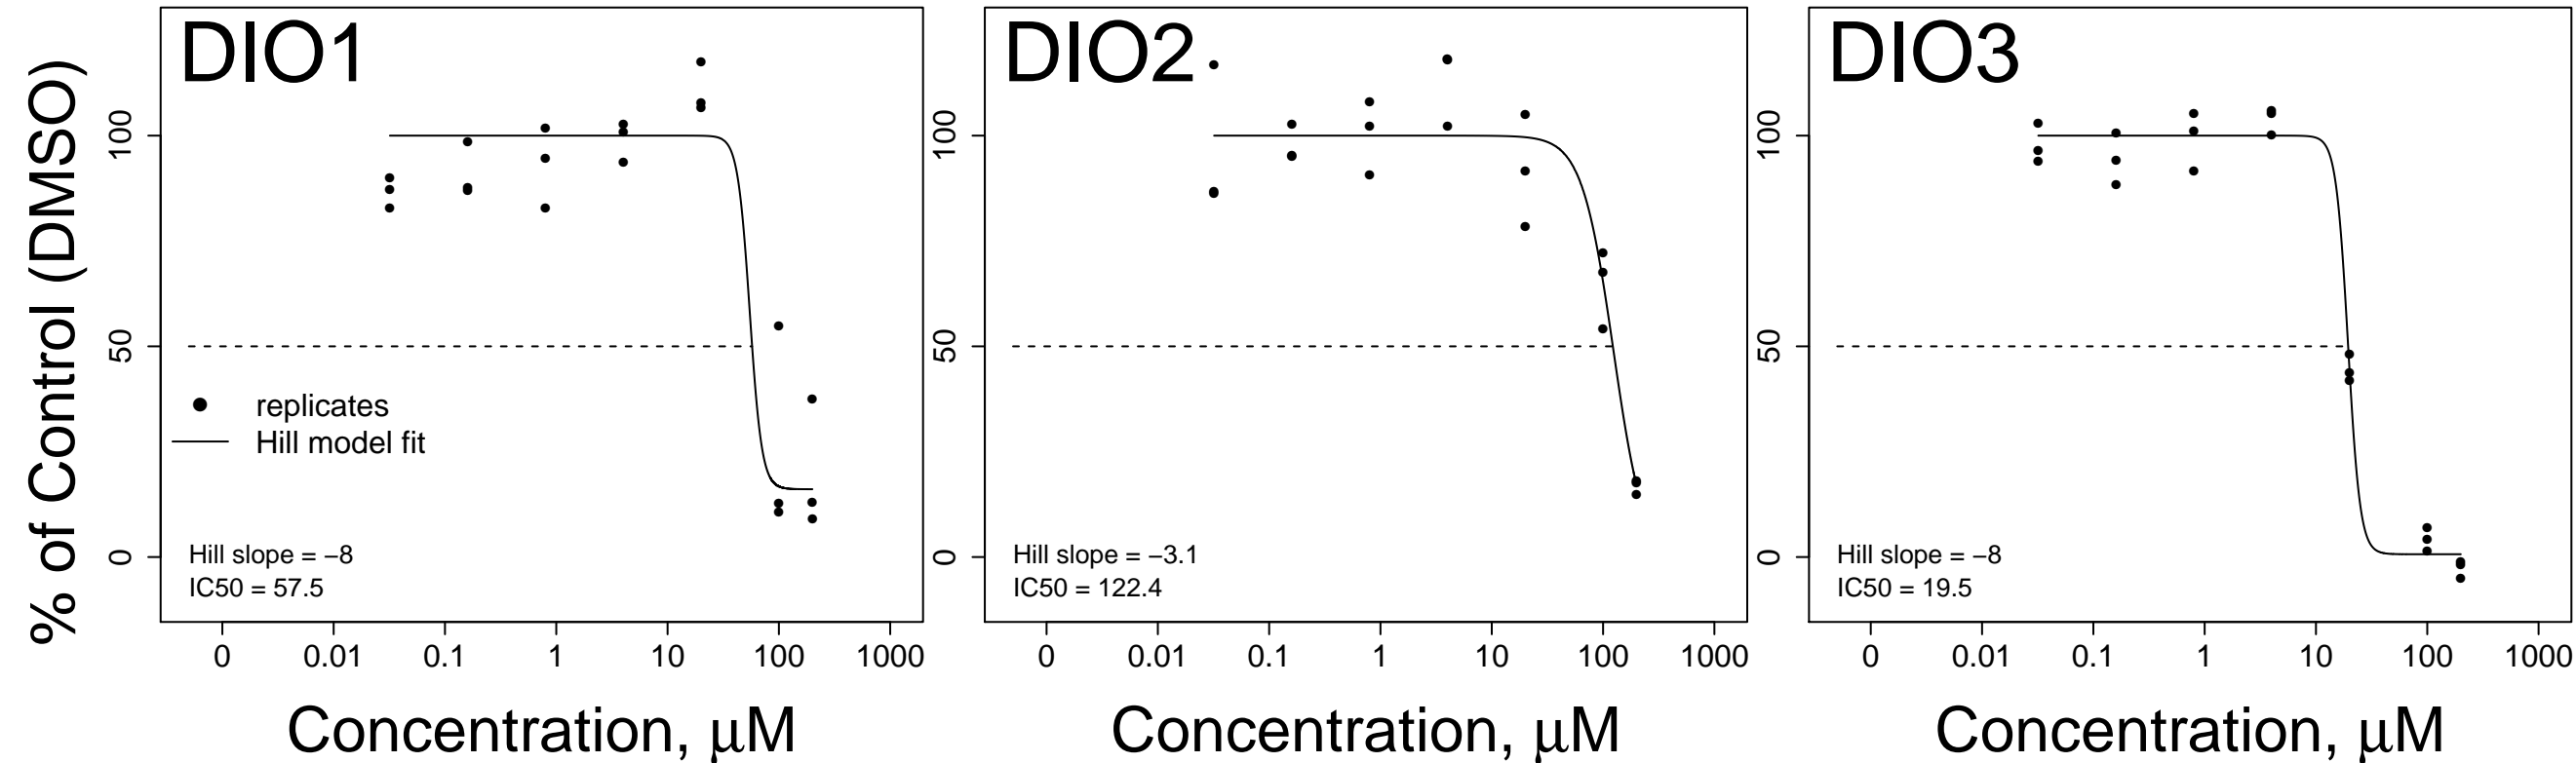

1,4-Dihydroxy-2-naphthoic acid CASRN: 31519-22-9

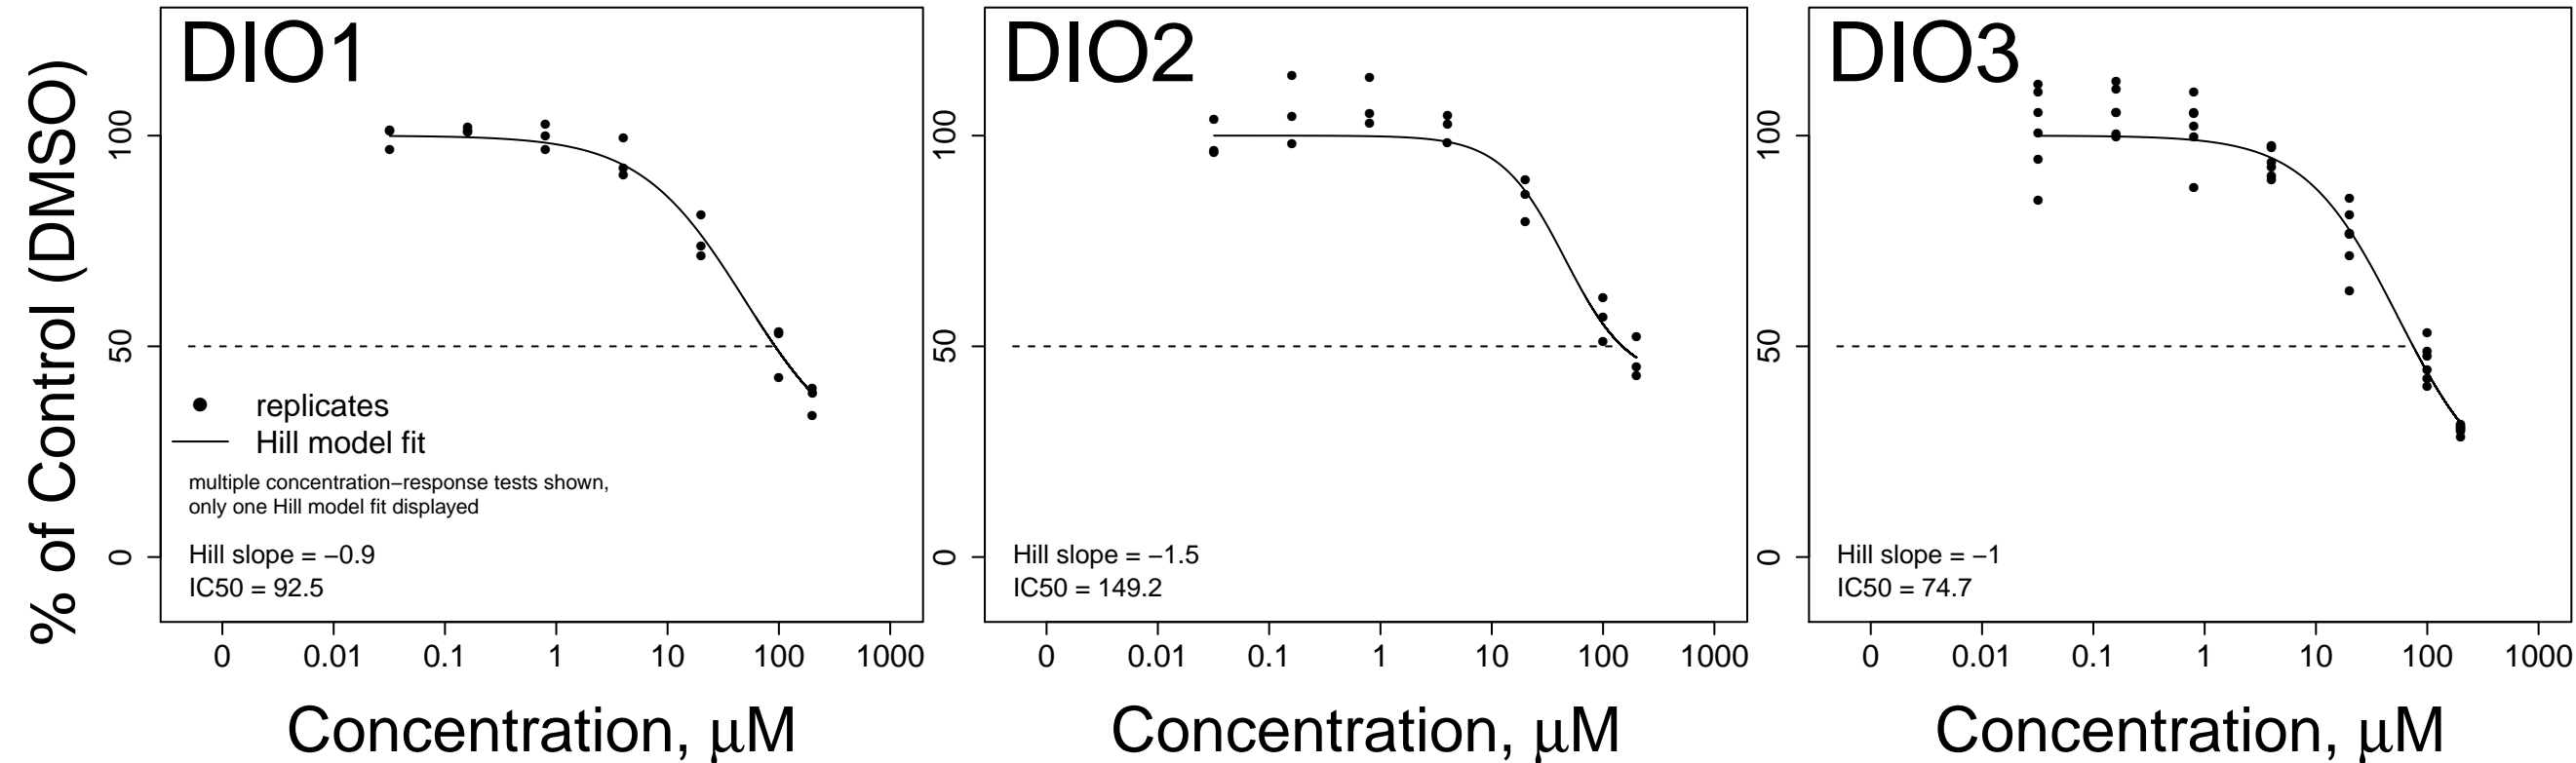

1,2,5,6,9,10–Hexabromocyclododecane CASRN: 3194–55–6

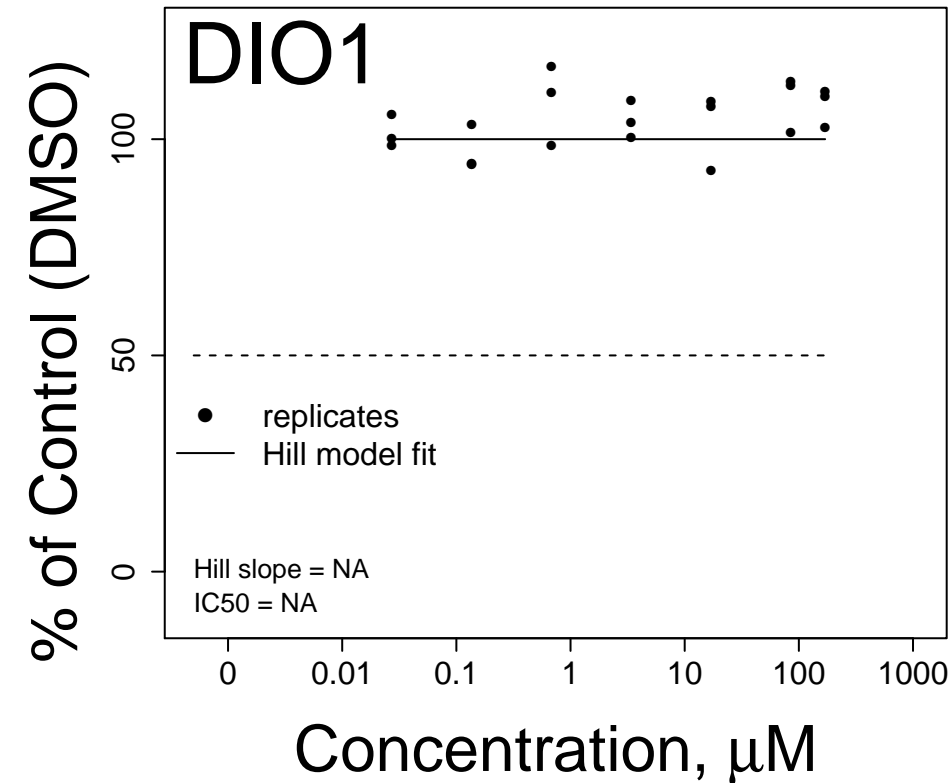

Temephos CASRN: 3383-96-8

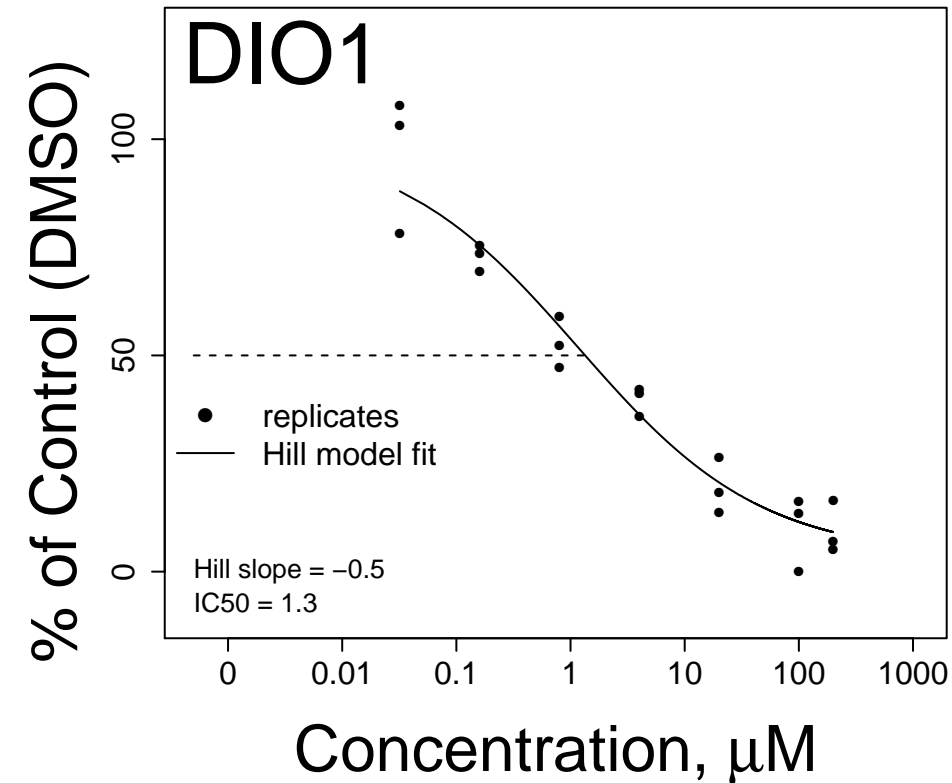

Codlure CASRN: 33956-49-9

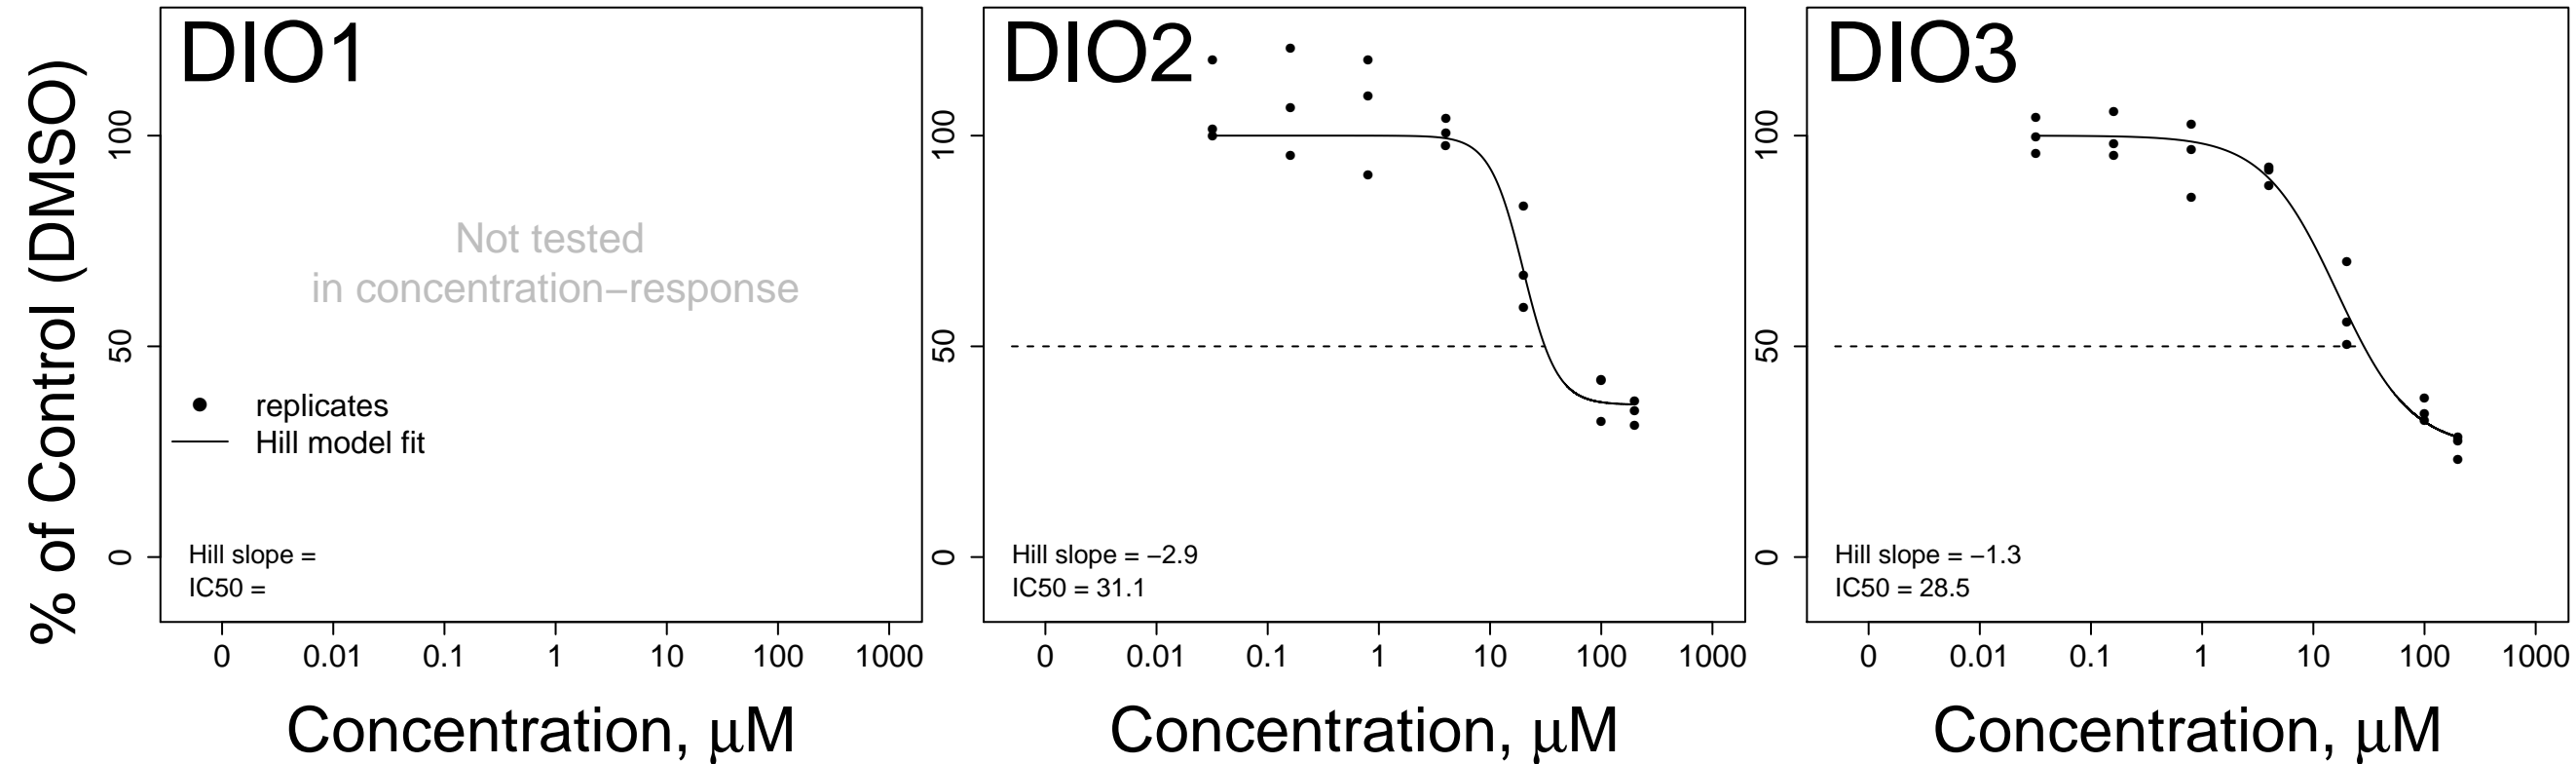

# Chlorophacinone CASRN: 3691-35-8

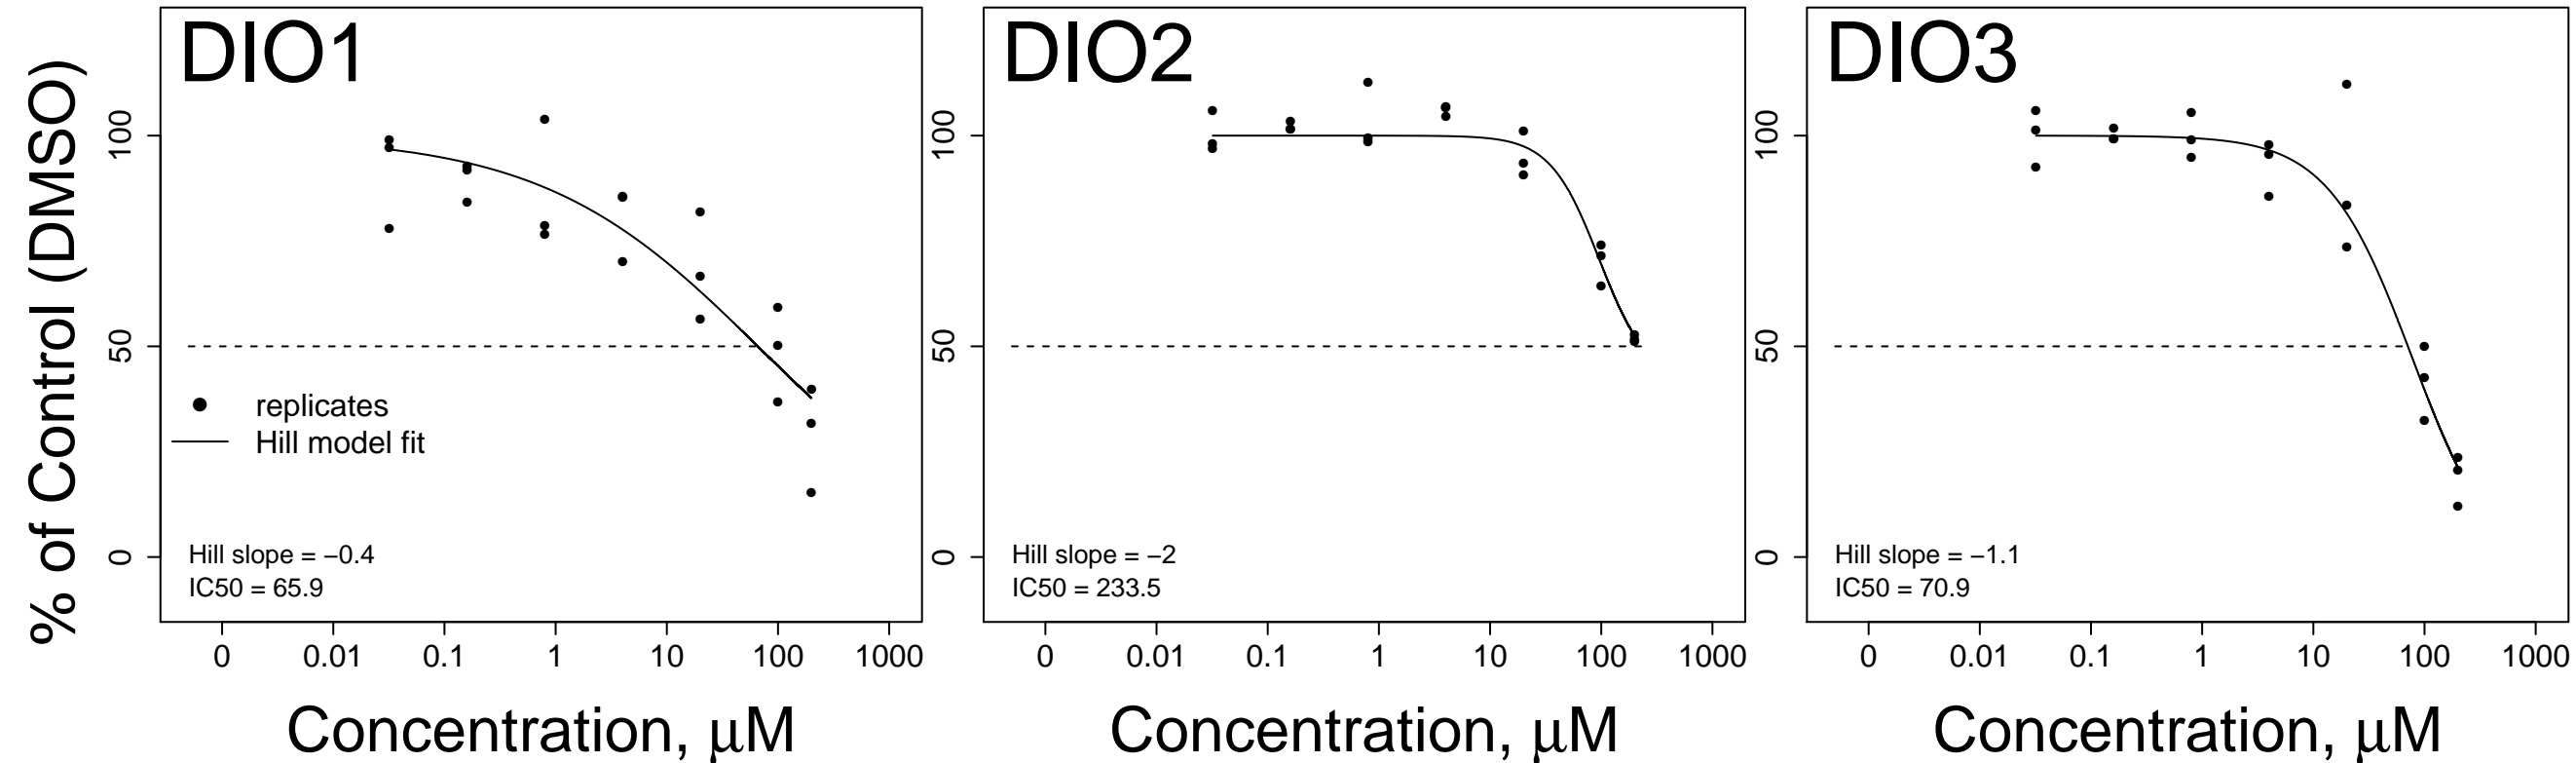

Dinocap CASRN: 39300-45-3

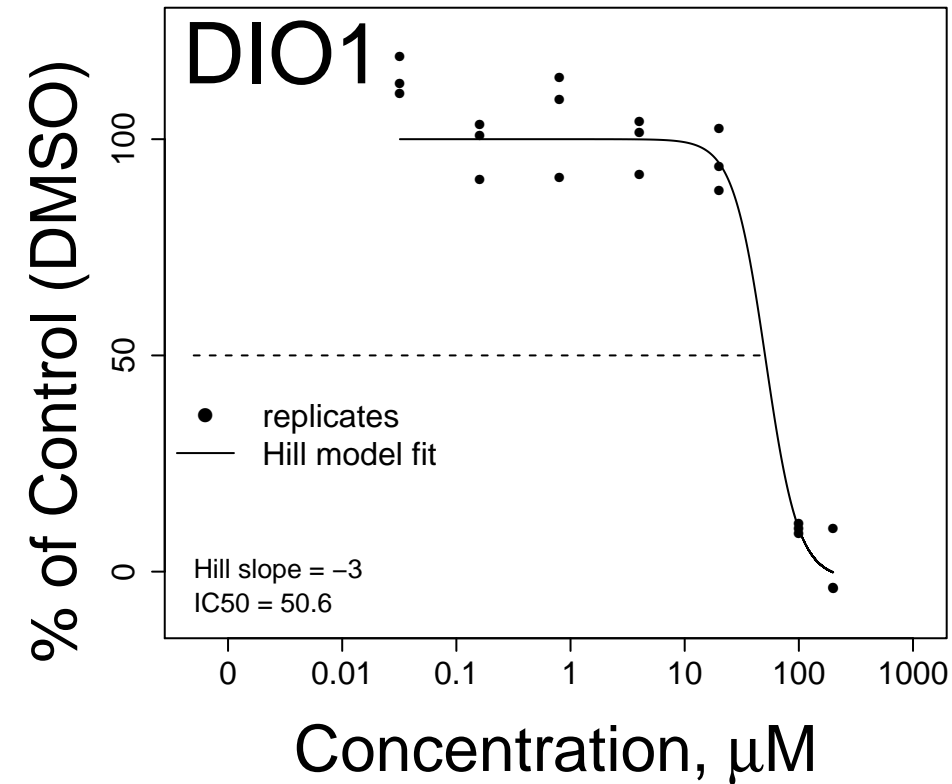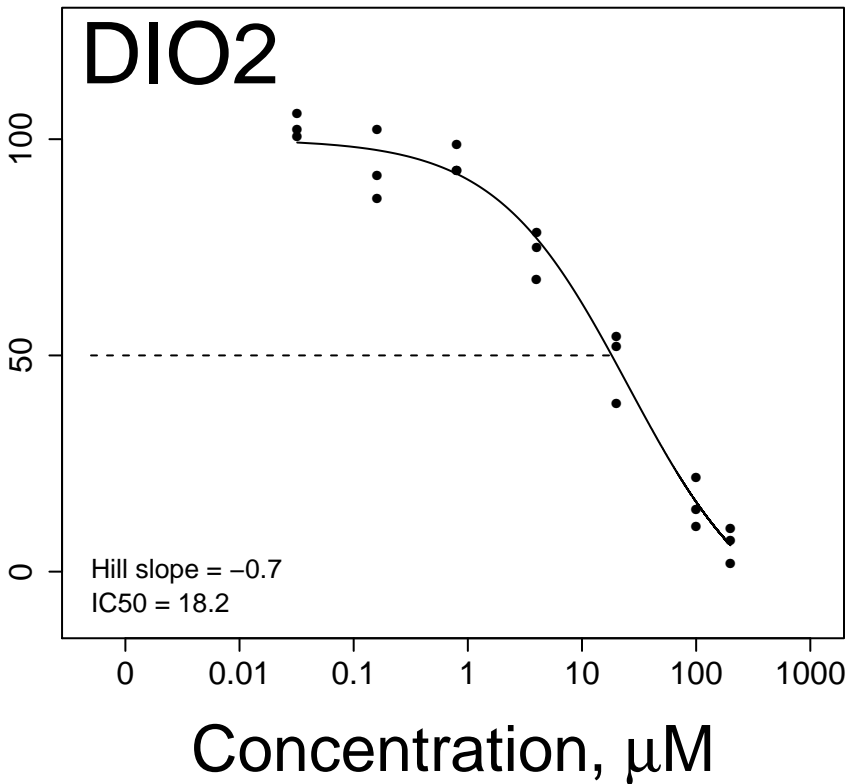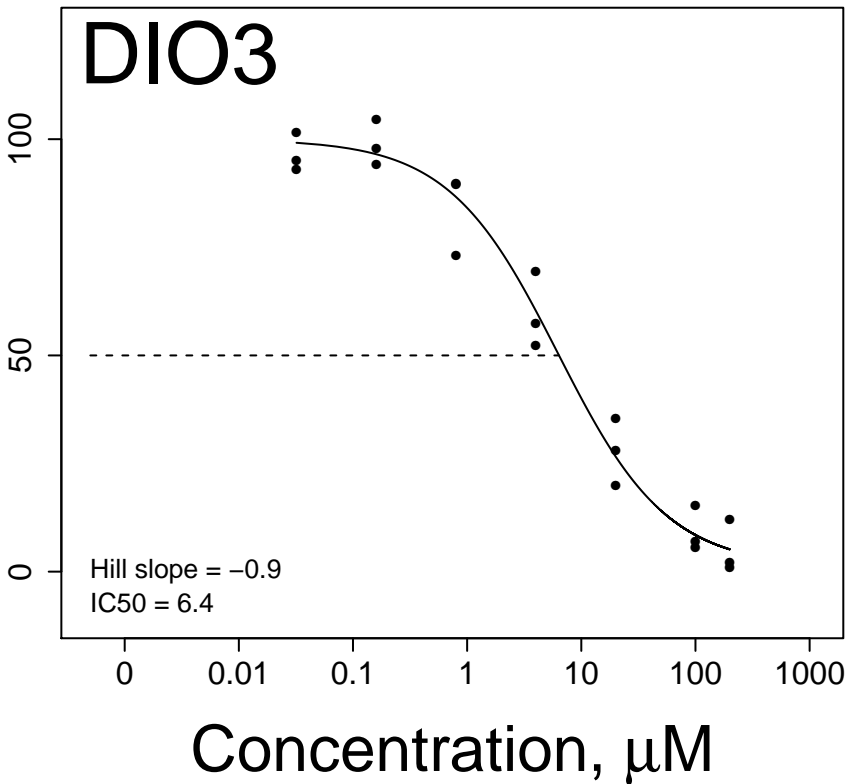

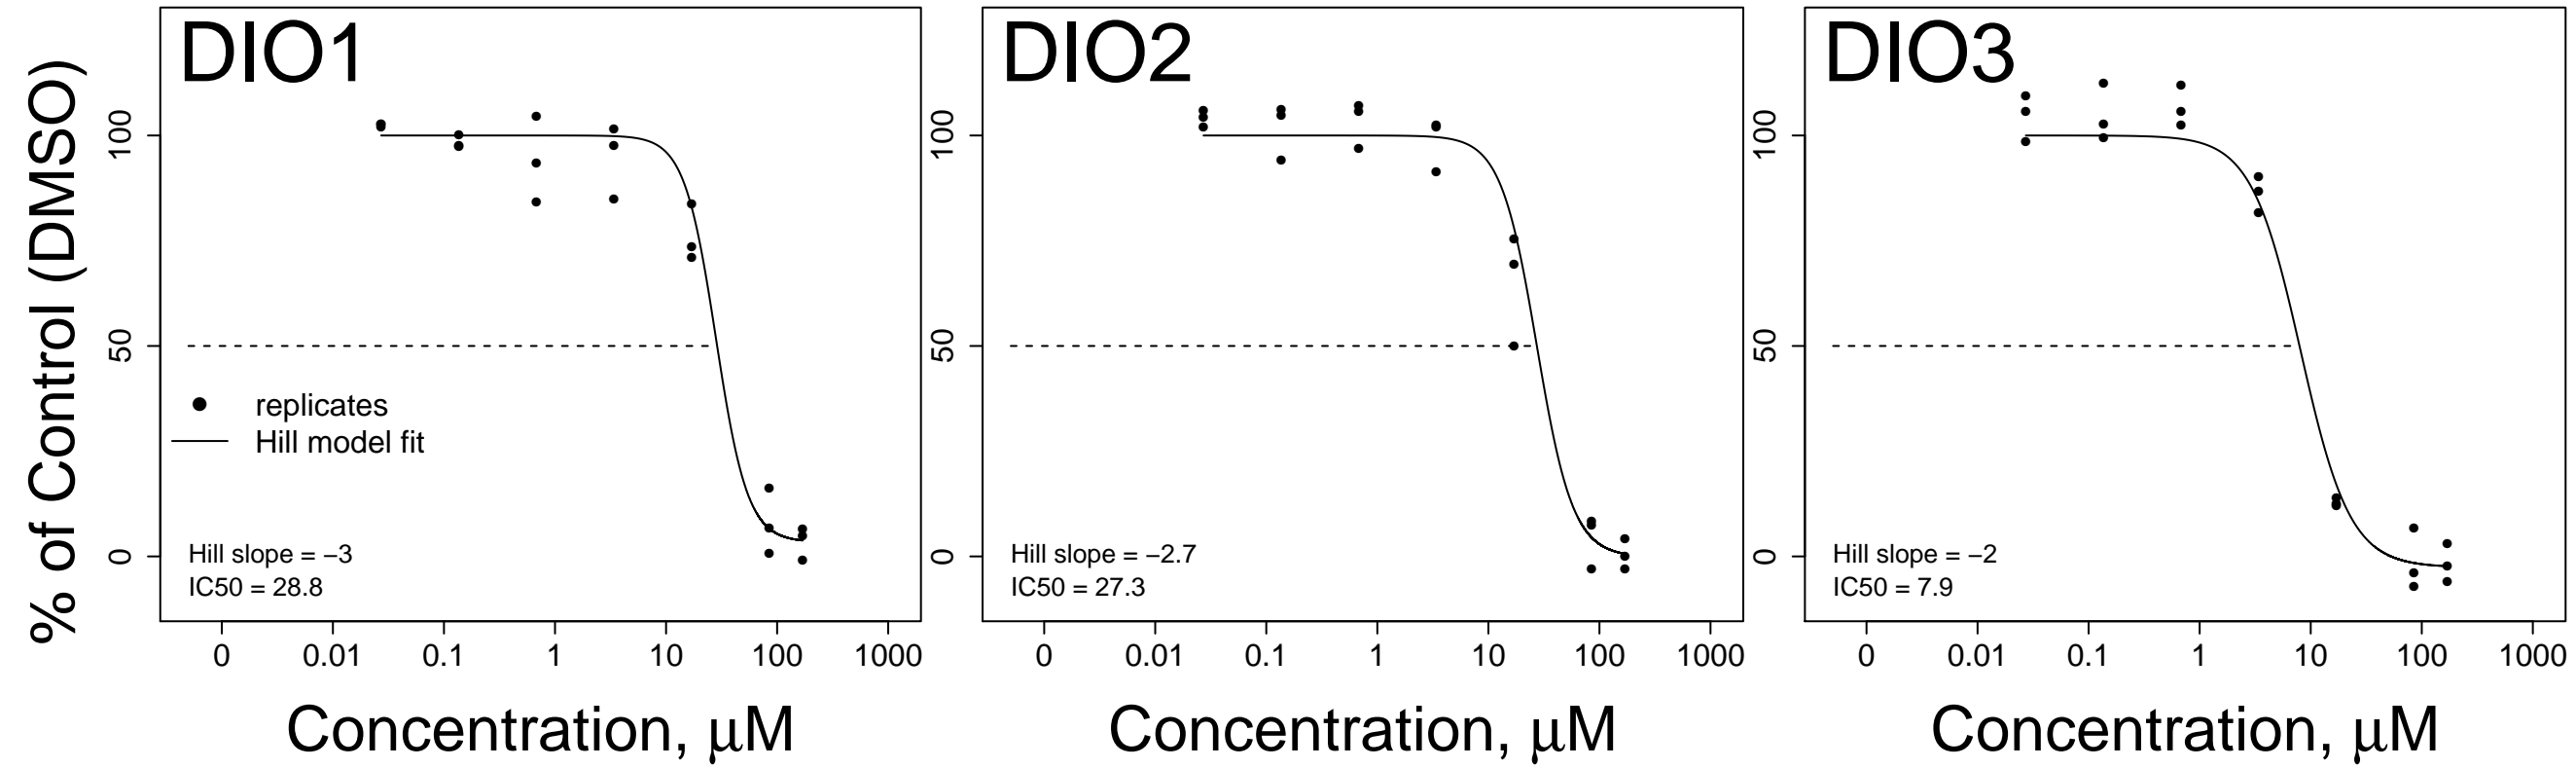



Farnesol CASRN: 4602-84-0

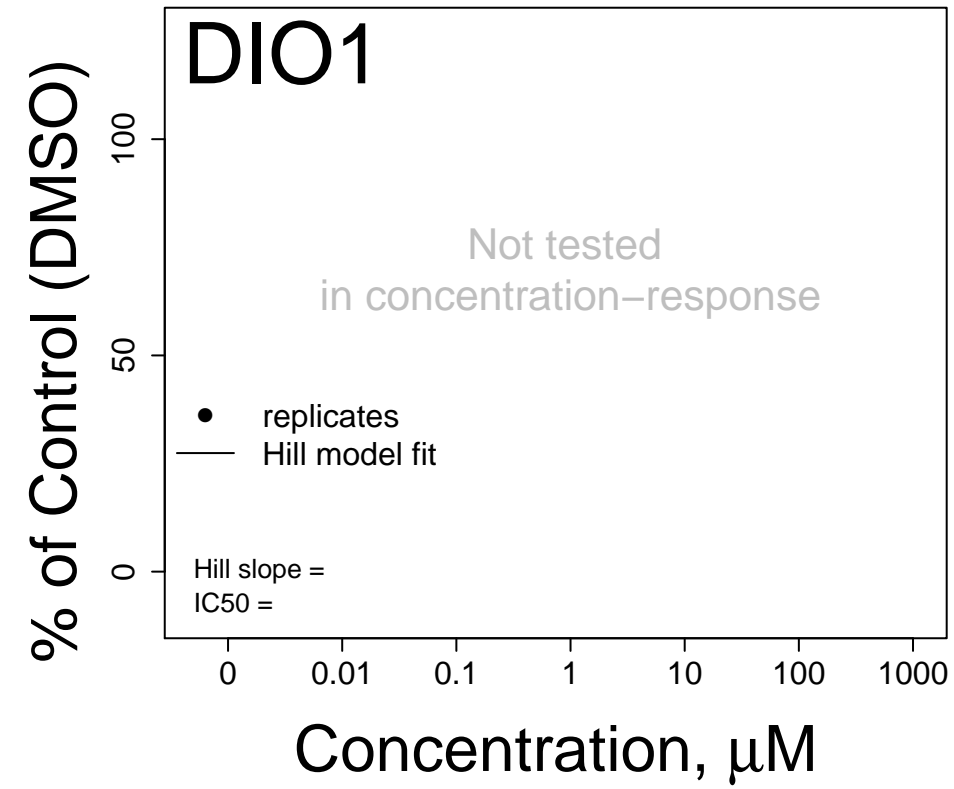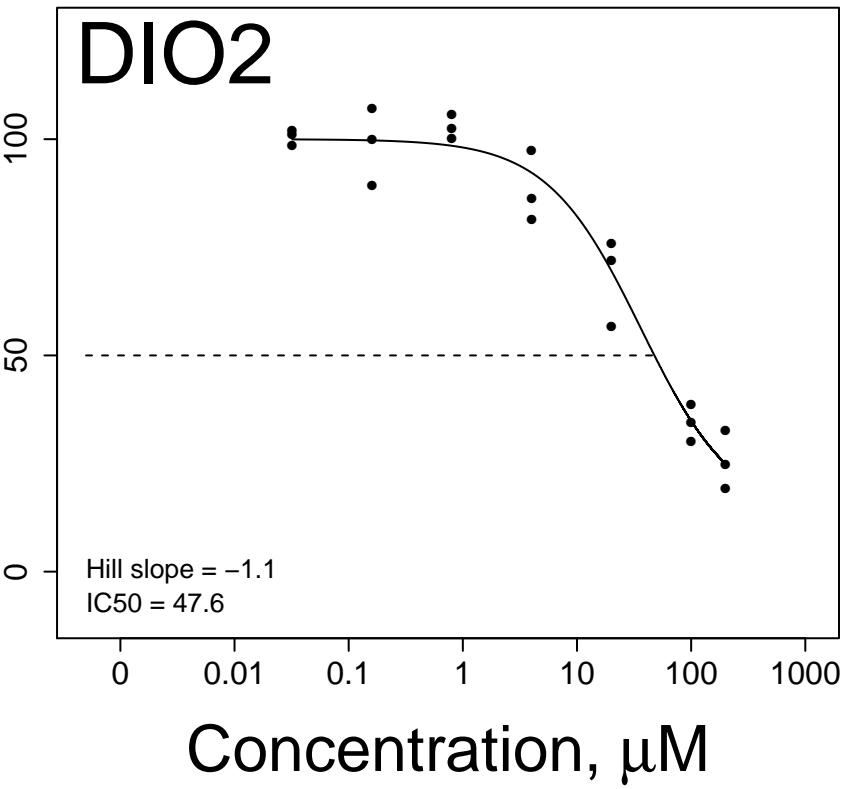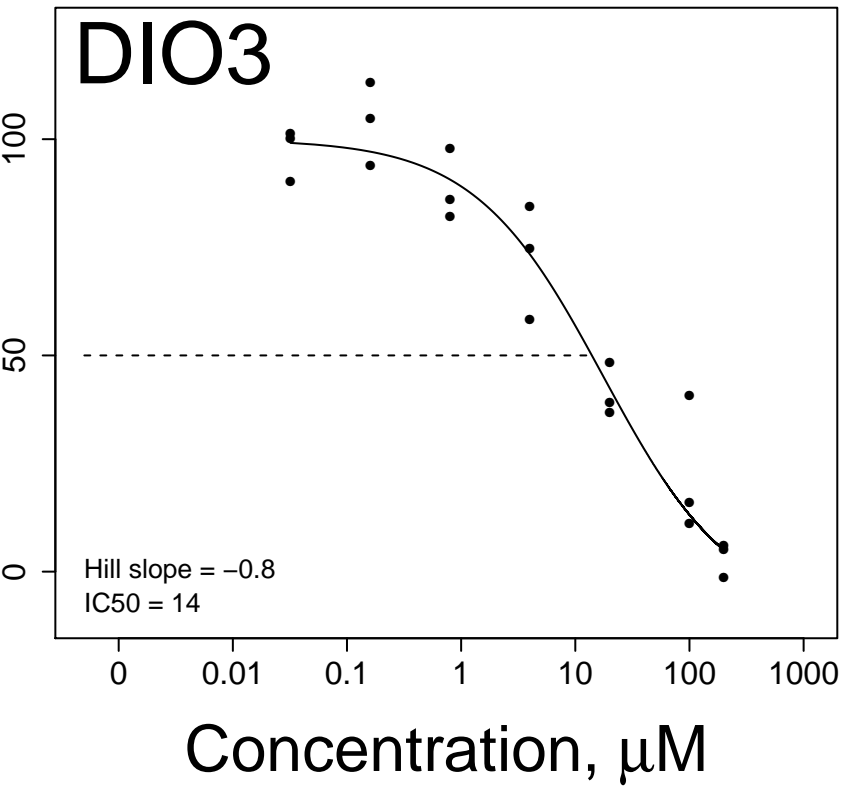

Linolenic acid CASRN: 463-40-1

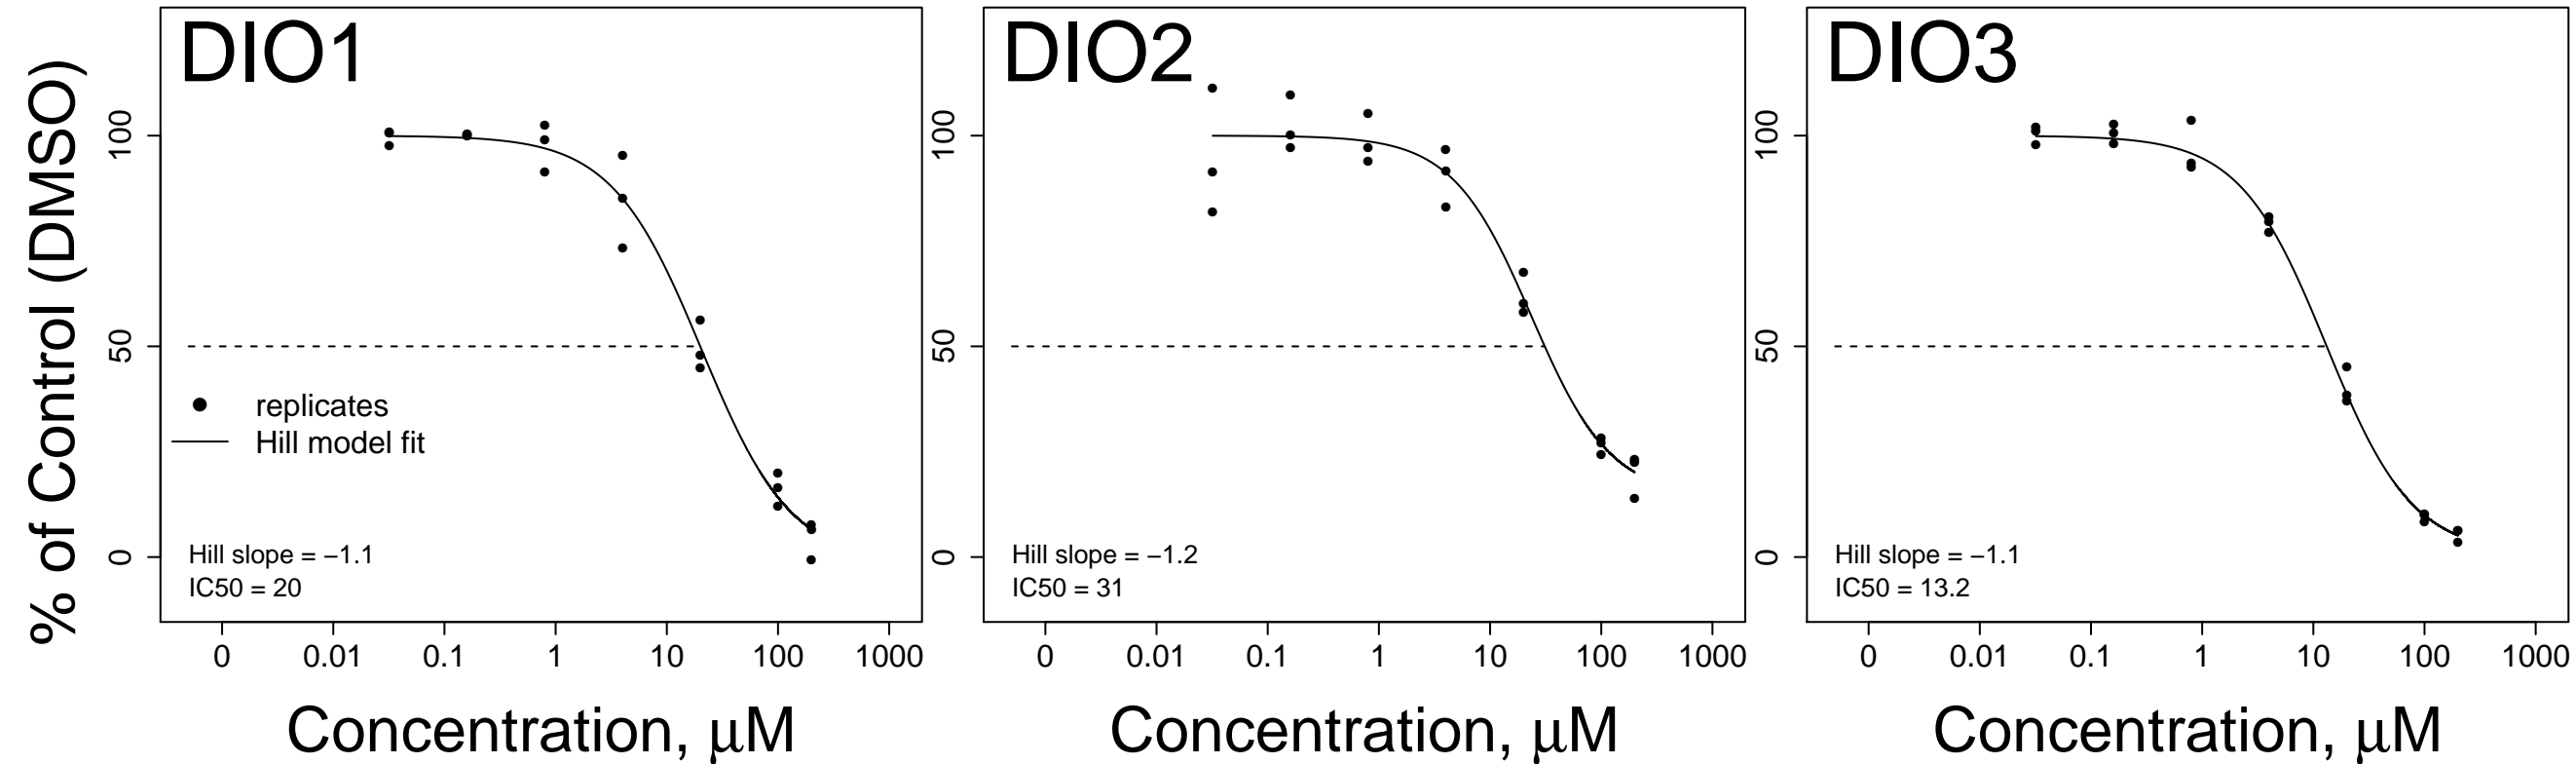

# Ergocalciferol CASRN: 50-14-6

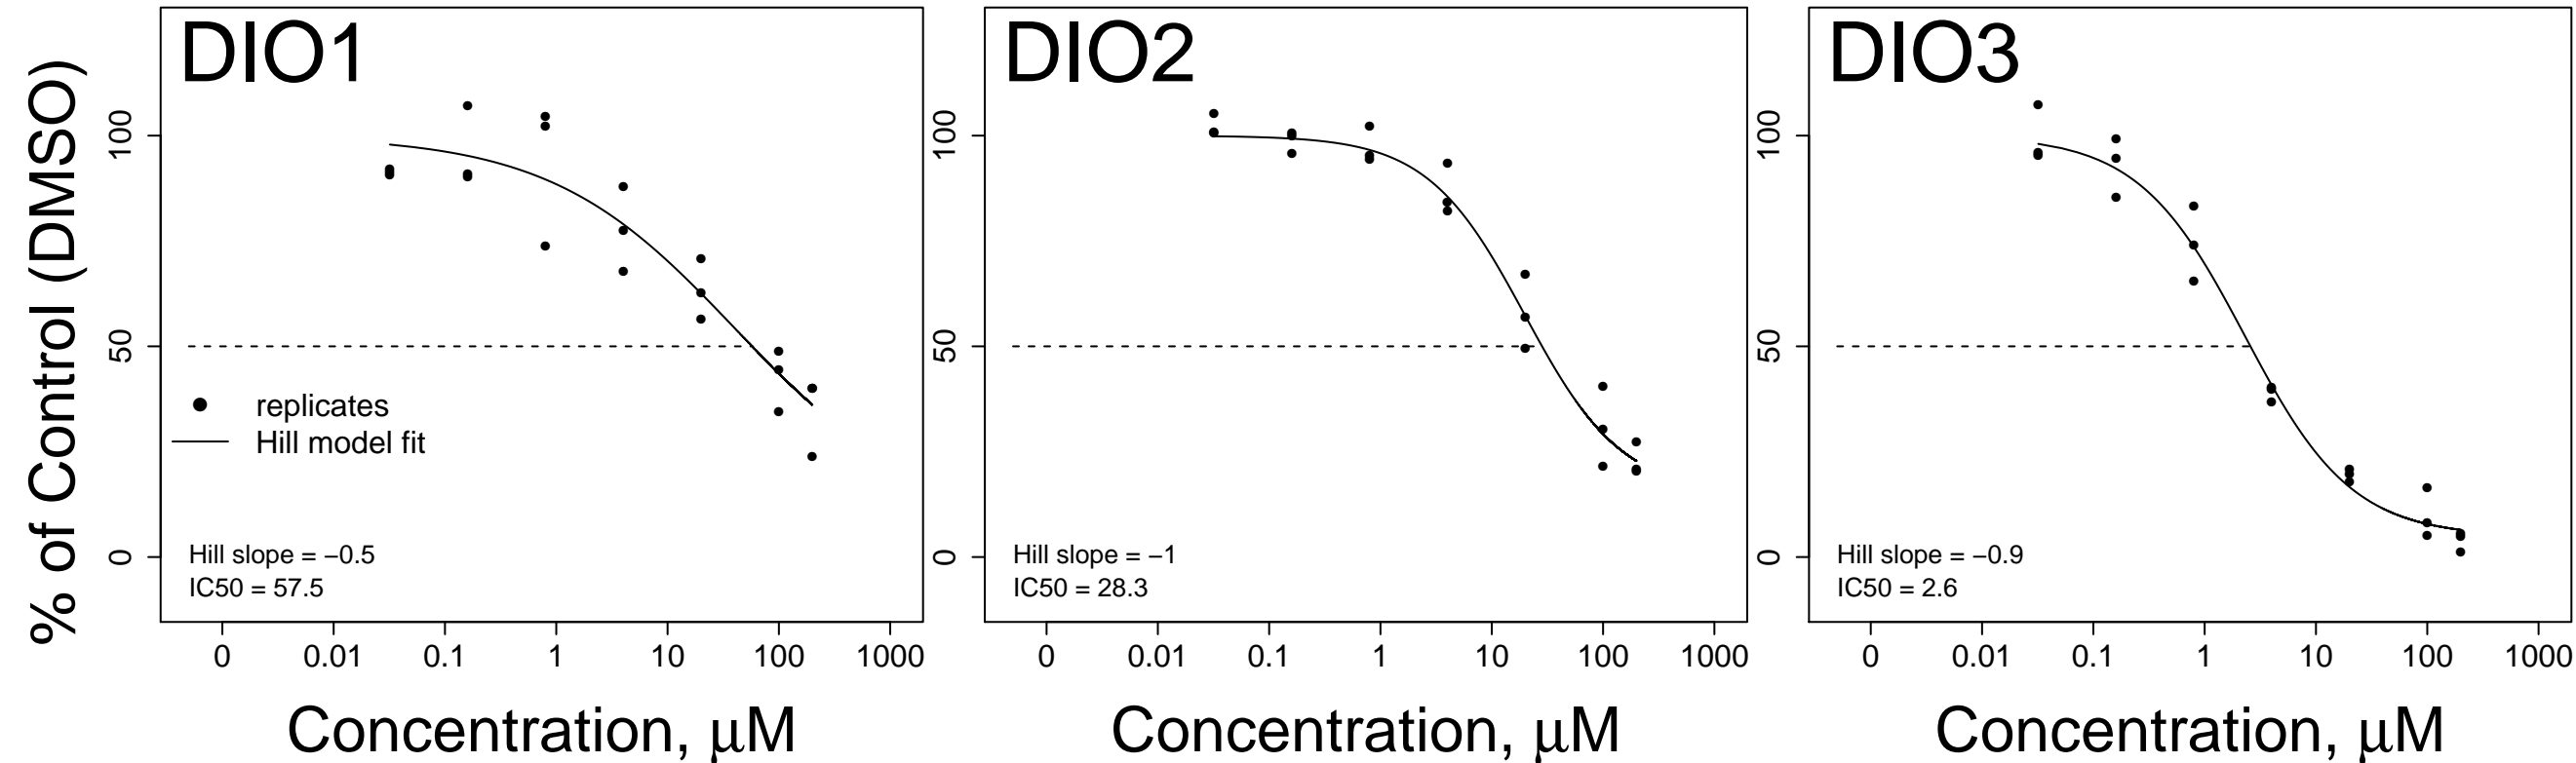

# Nordihydroguaiaretic acid CASRN: 500-38-9

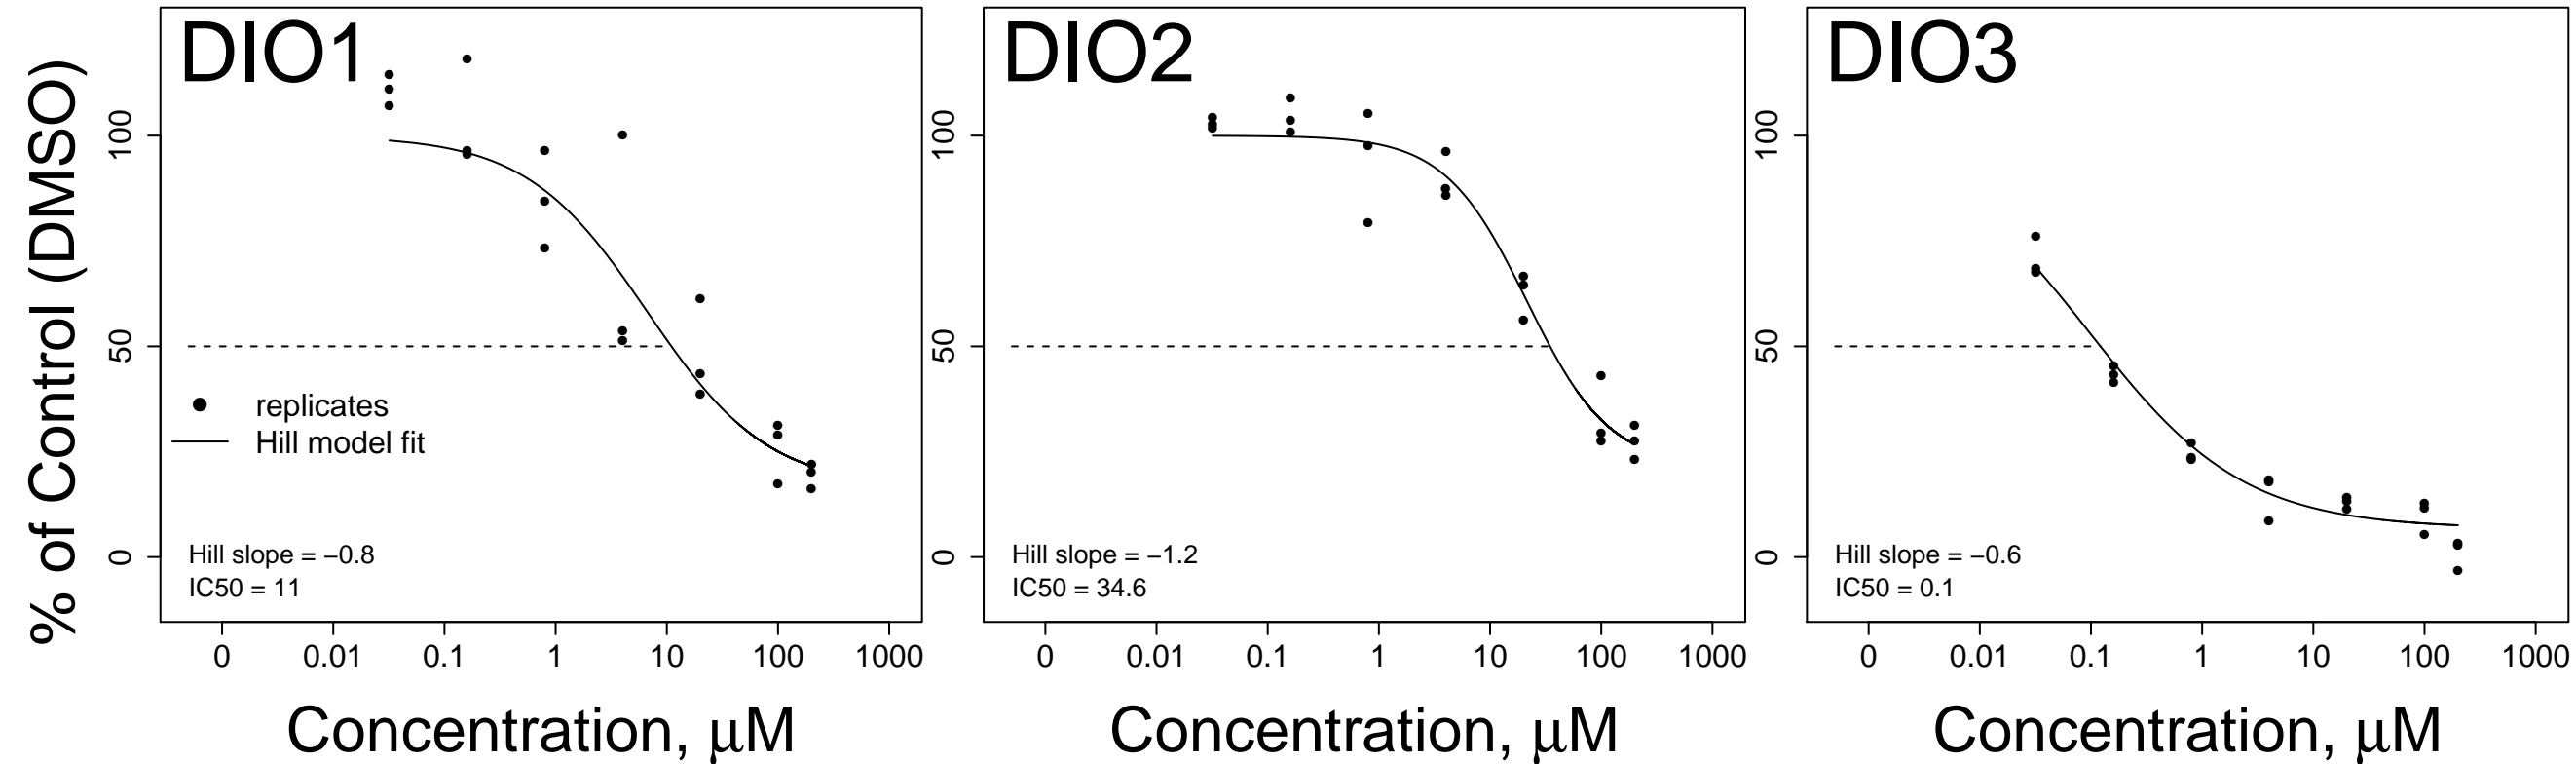

Monotridecyl phosphate CASRN: 5116-94-9

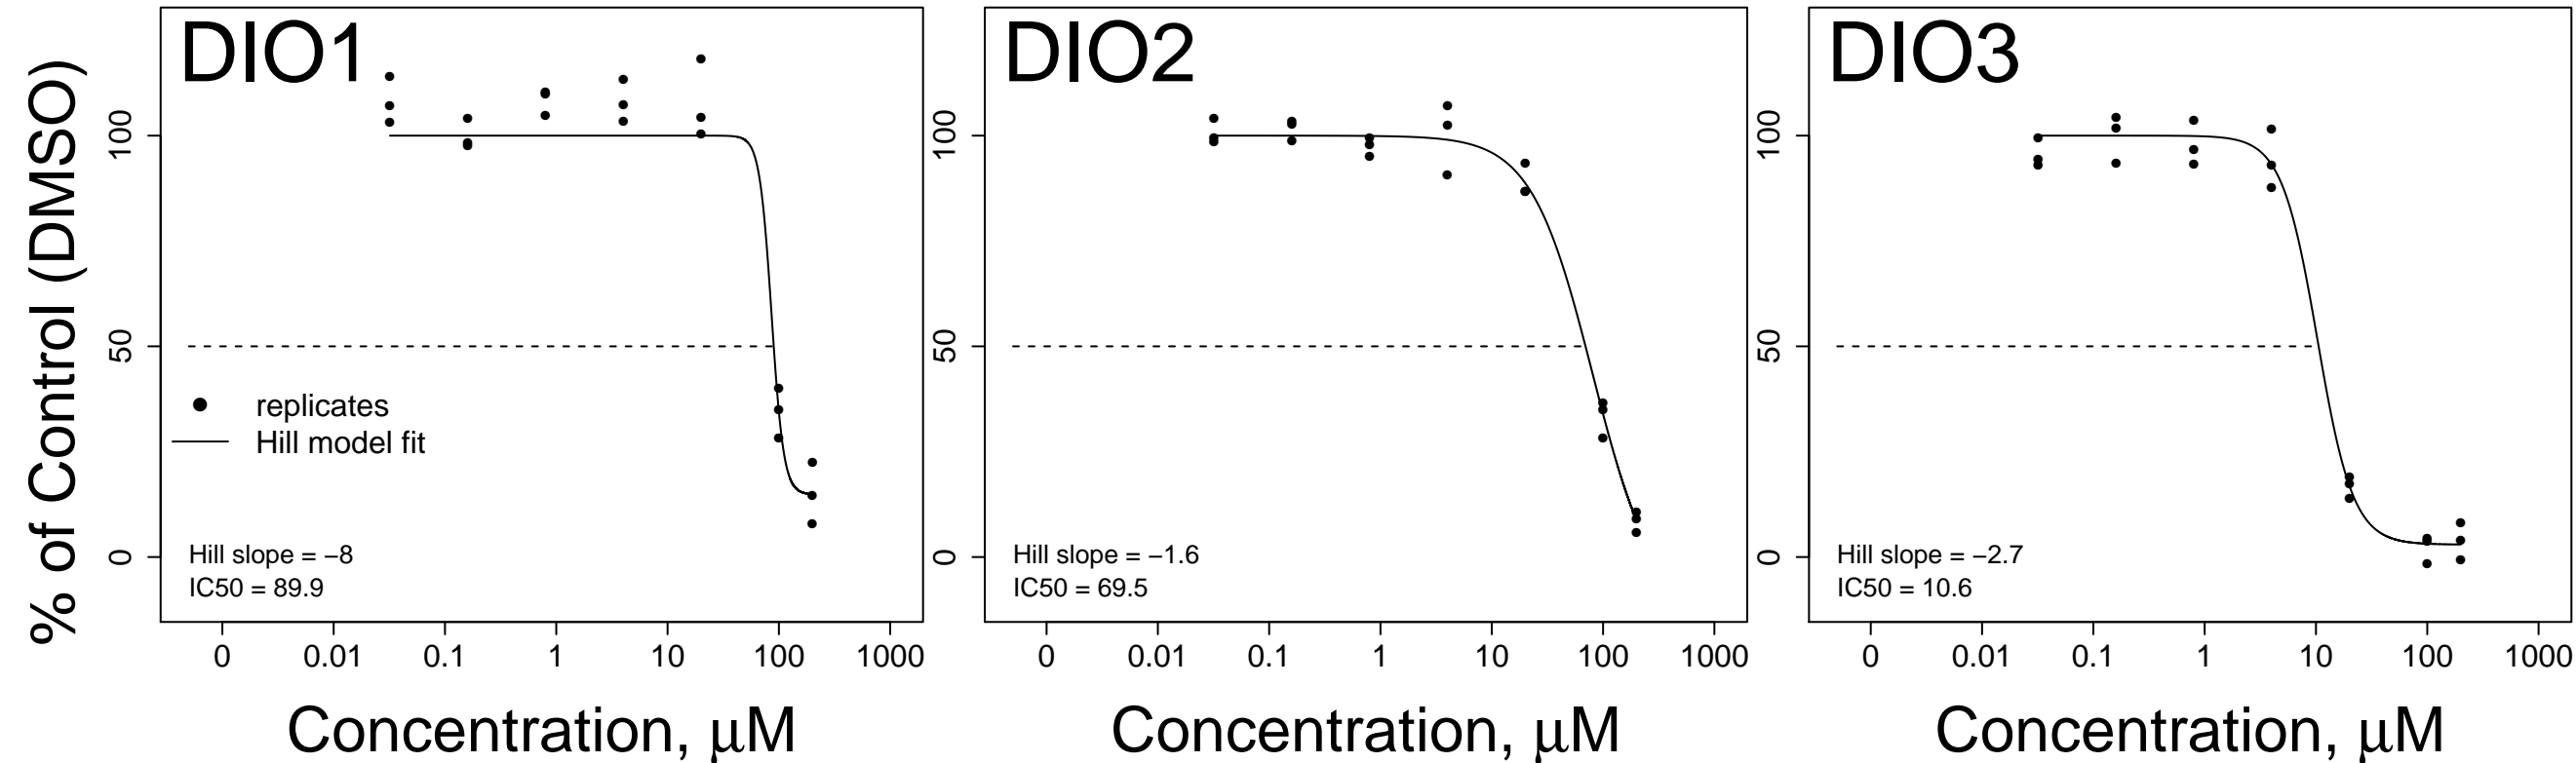

# Chloroallyl methenamine chloride CASRN: 51229-78-8

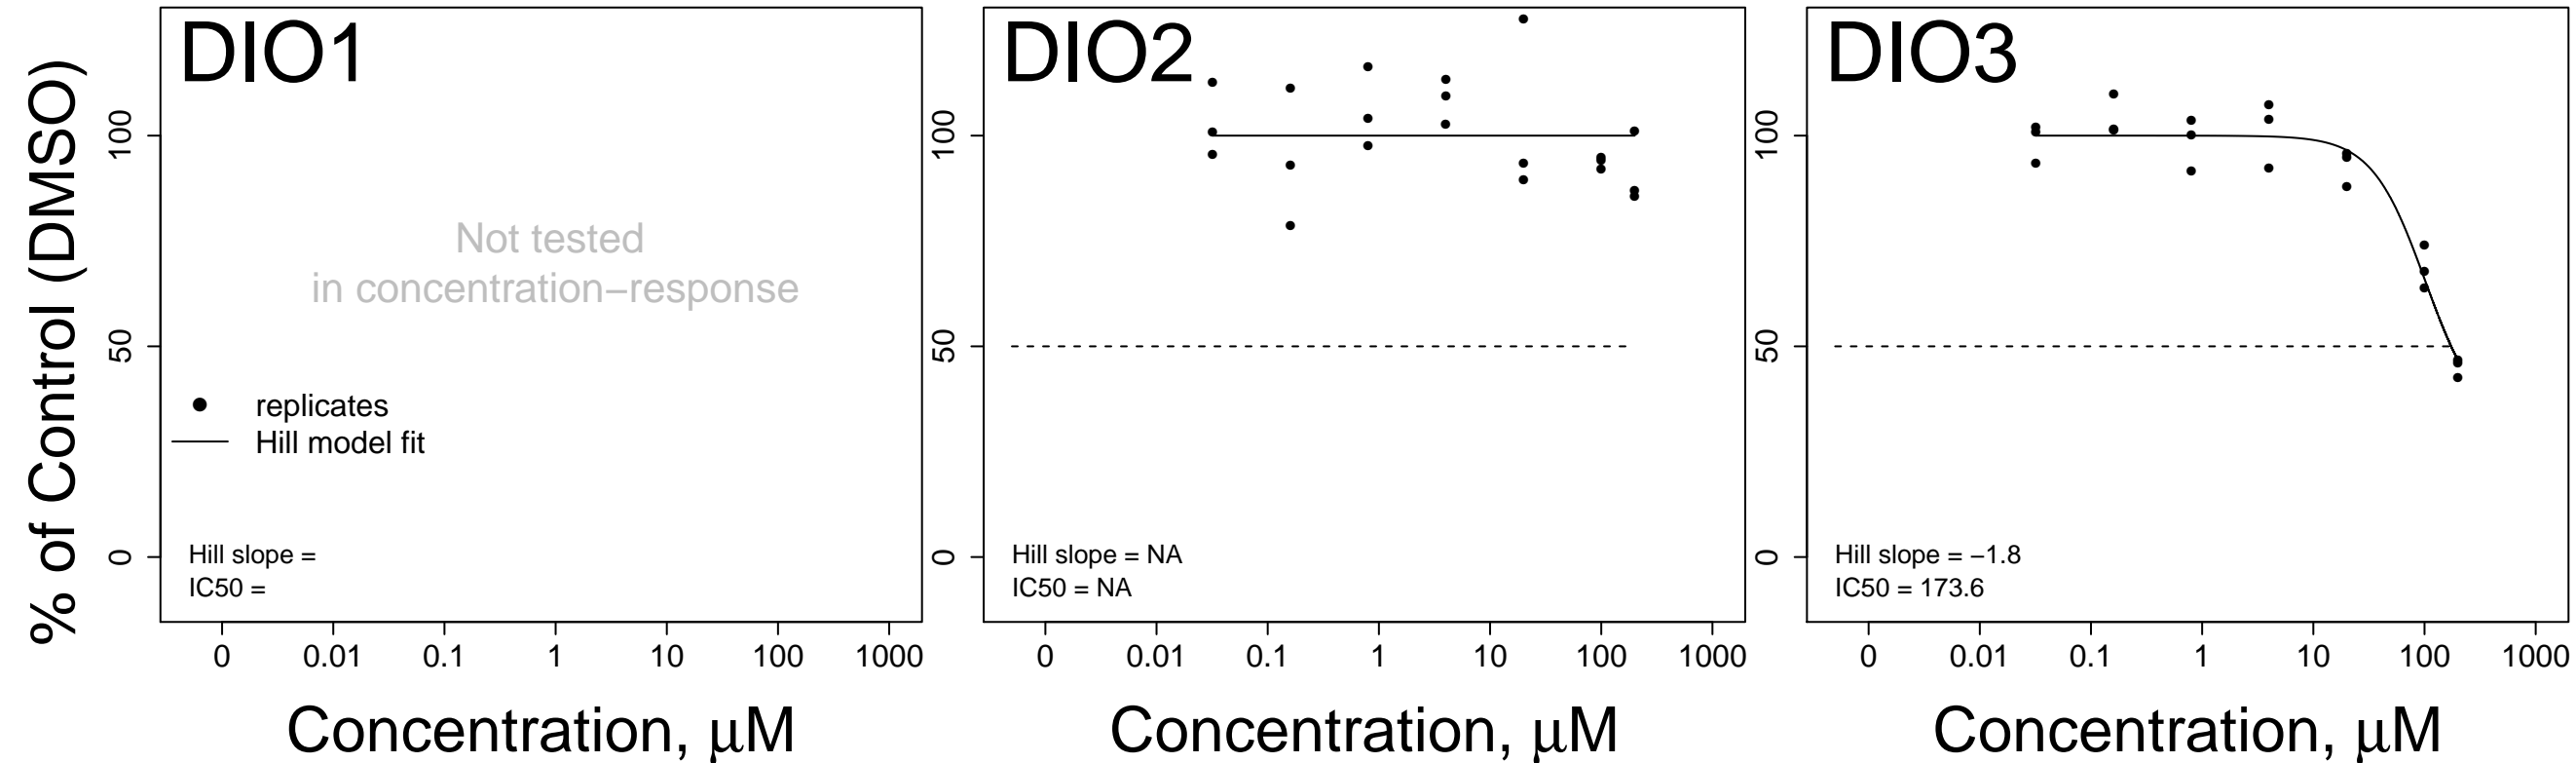

Methyltrioctylammonium chloride CASRN: 5137-55-3

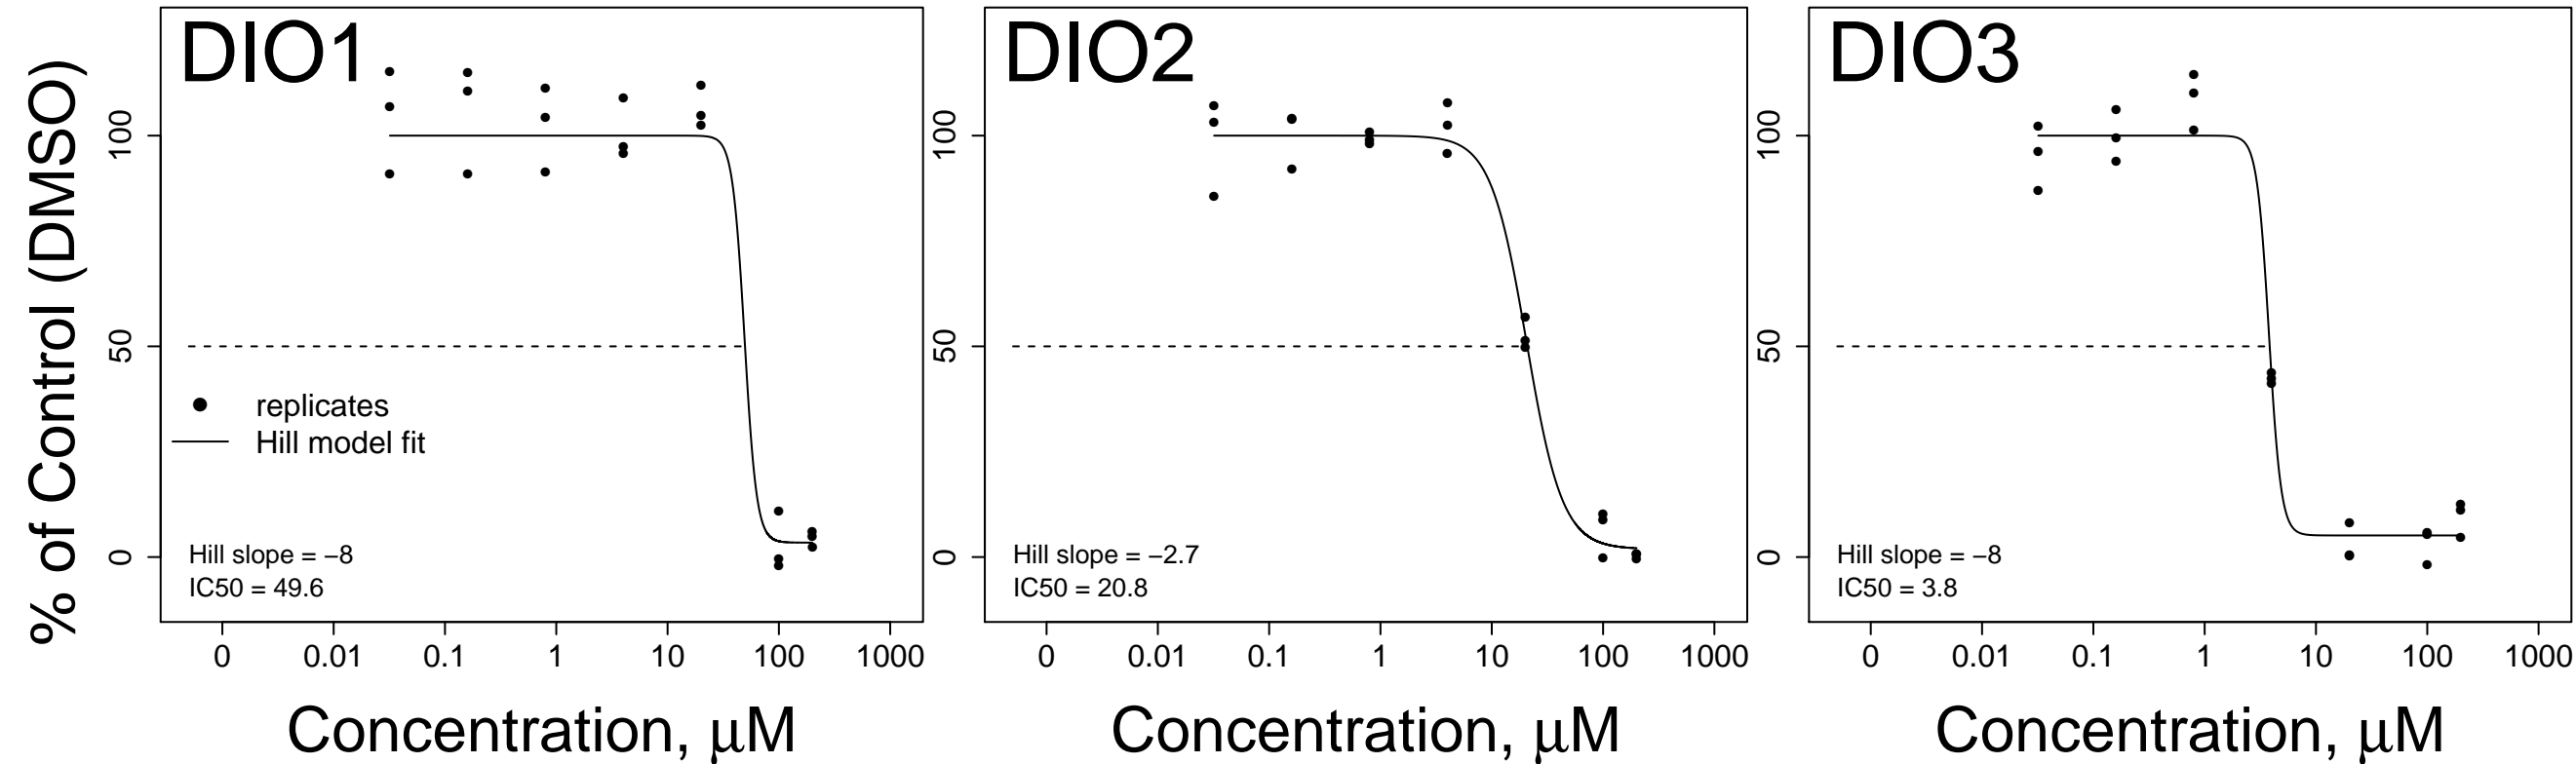

# 2-Ethylhexylparaben CASRN: 5153-25-3

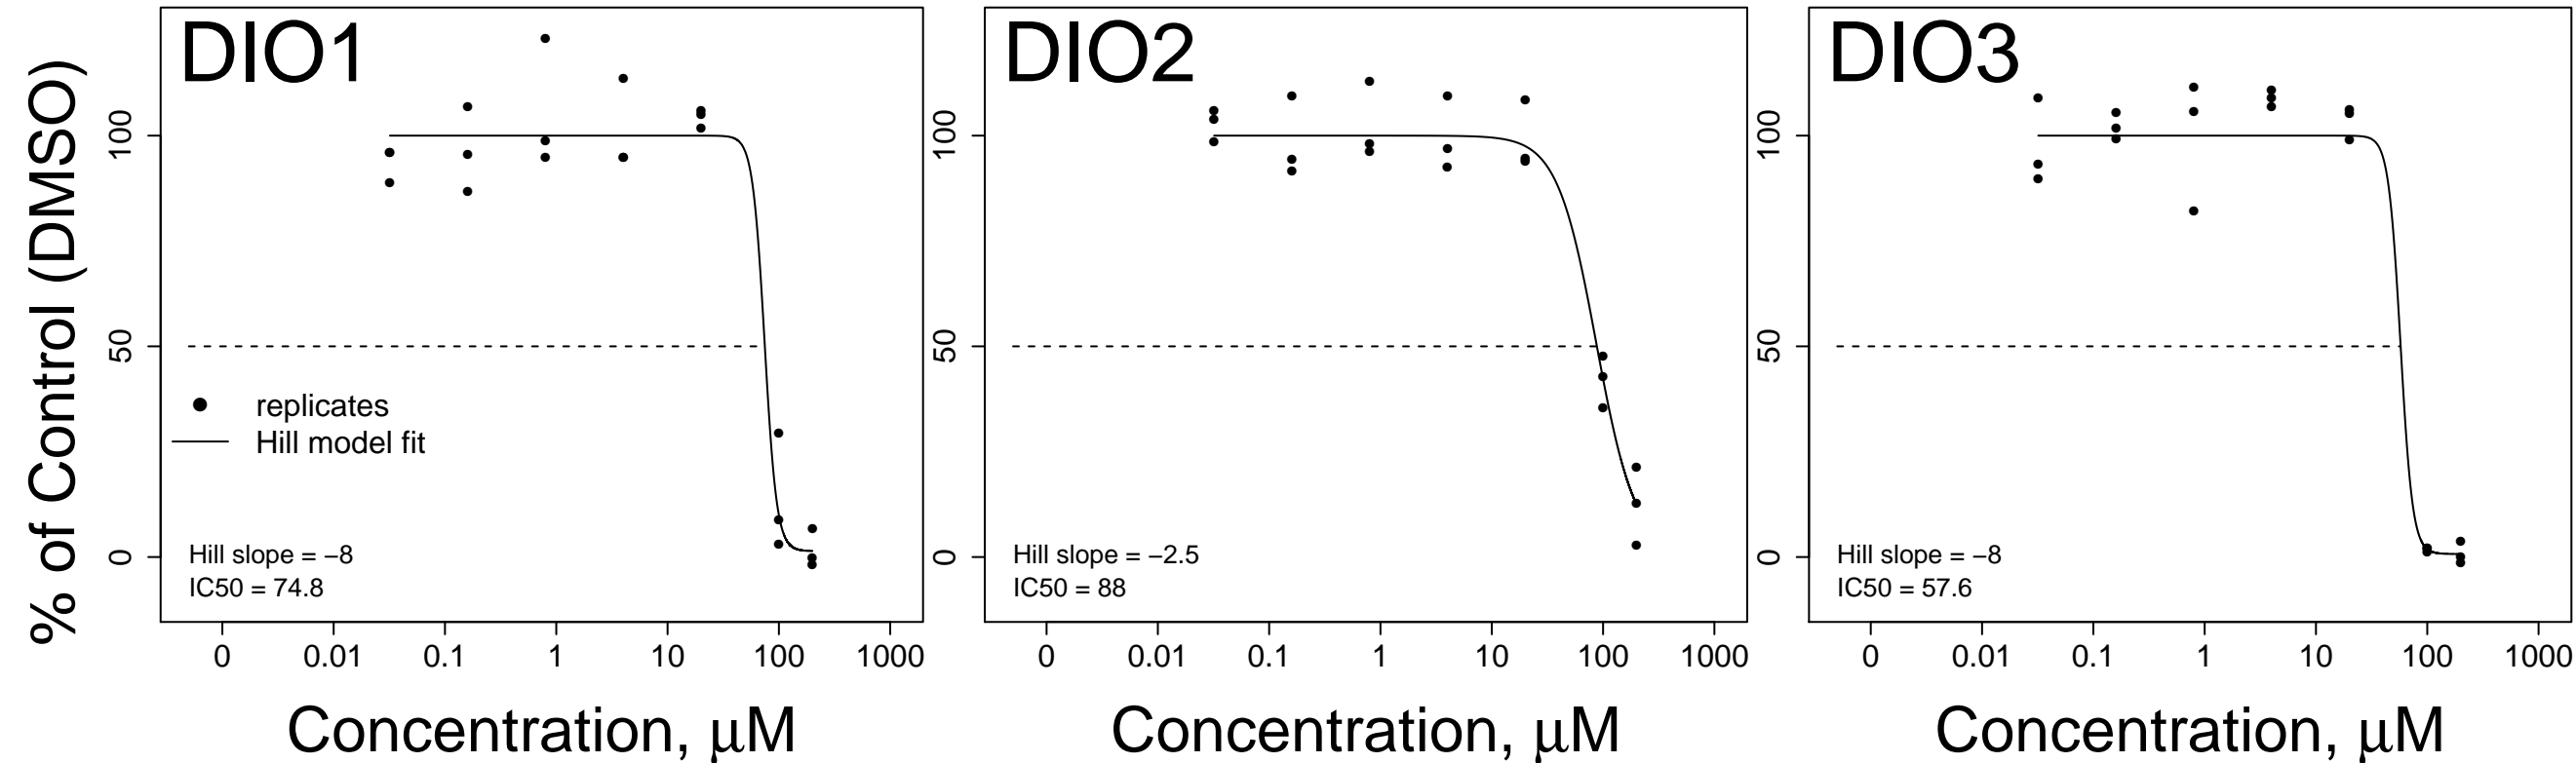



Tetradecanoic acid CASRN: 544-63-8

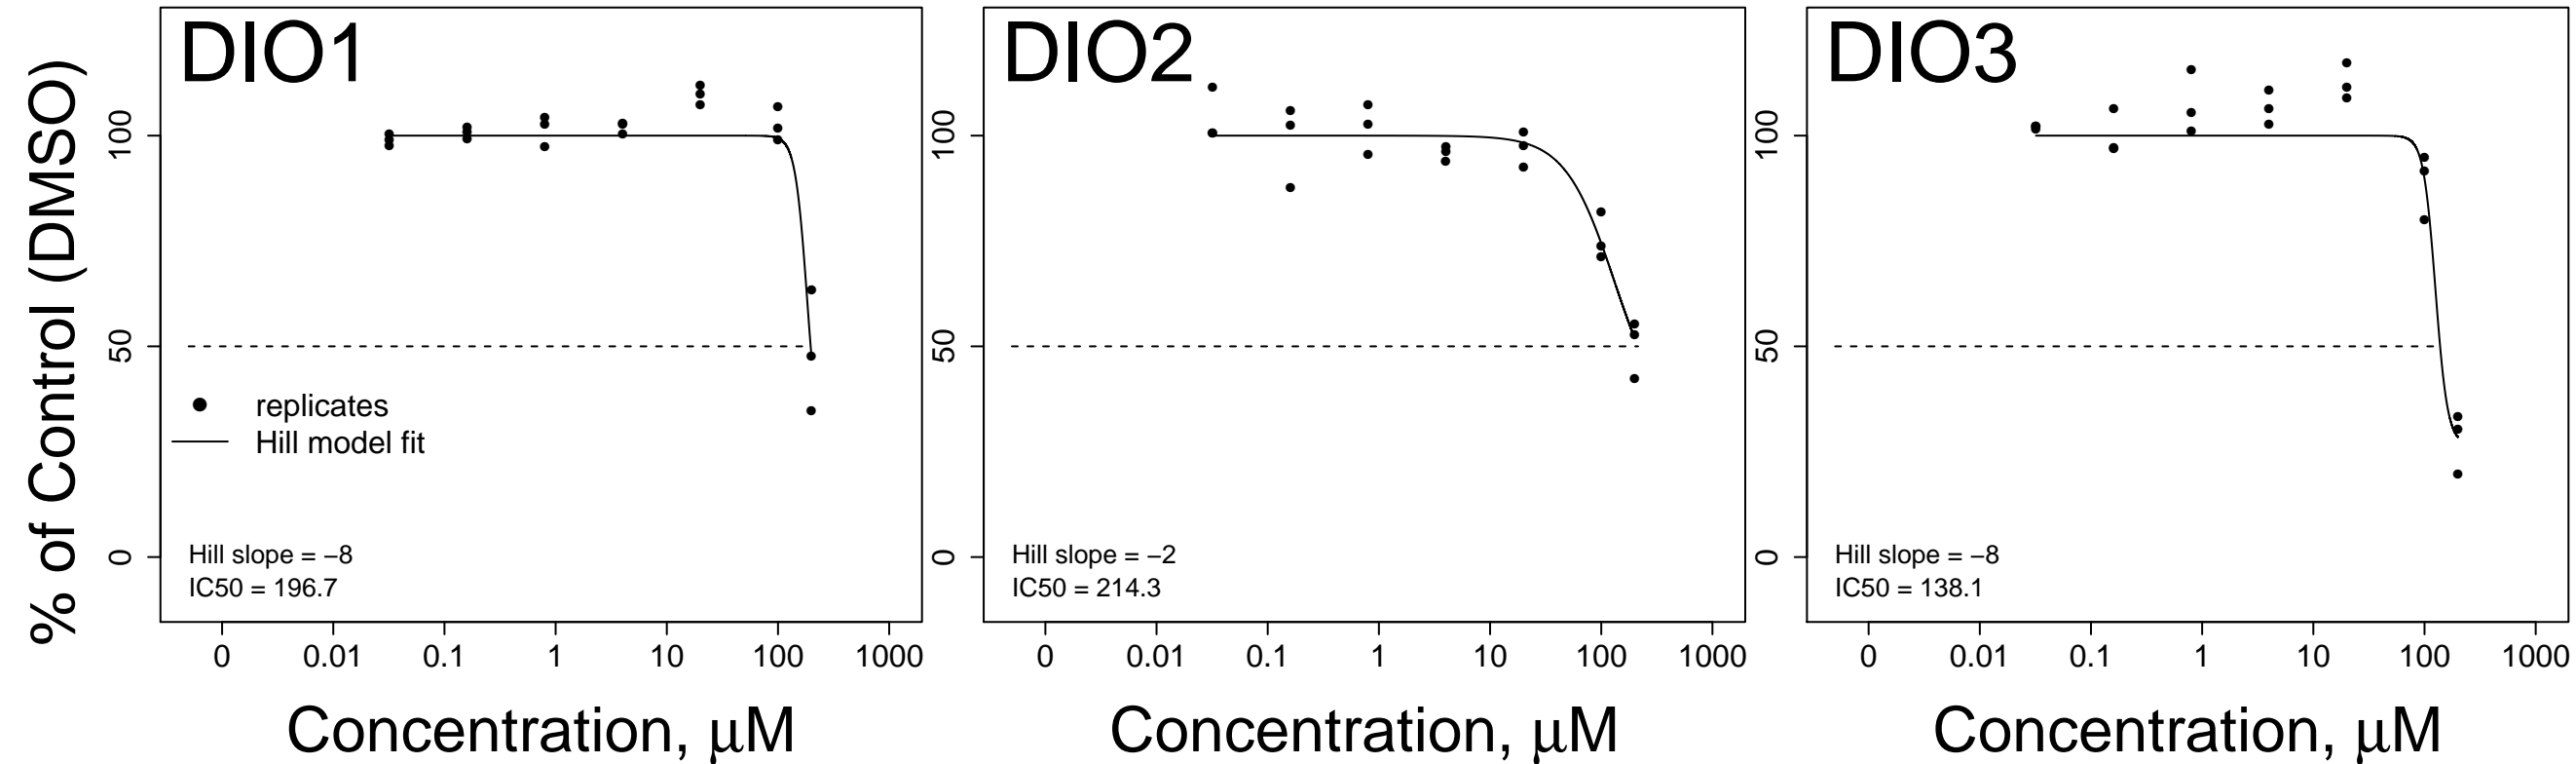

Chlorhexidine diacetate CASRN: 56-95-1

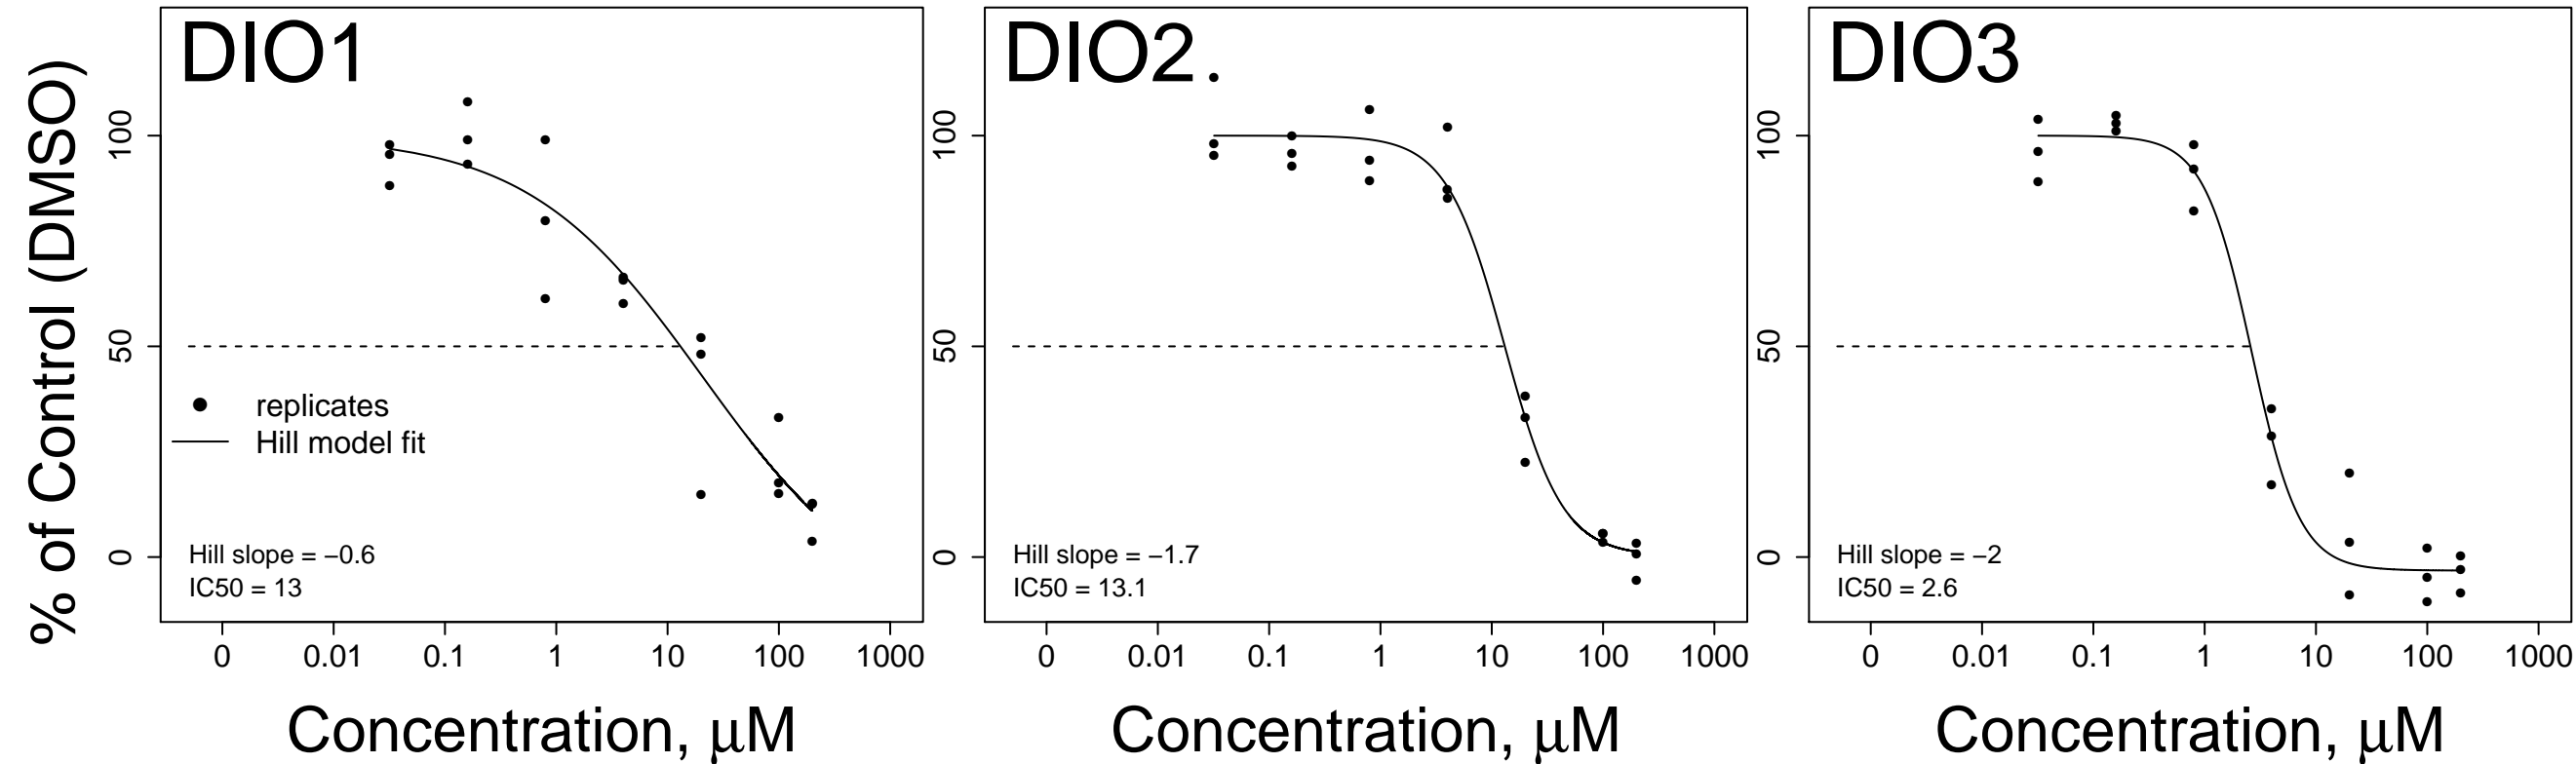

# Hexadecyltrimethylammonium bromide CASRN: 57-09-0

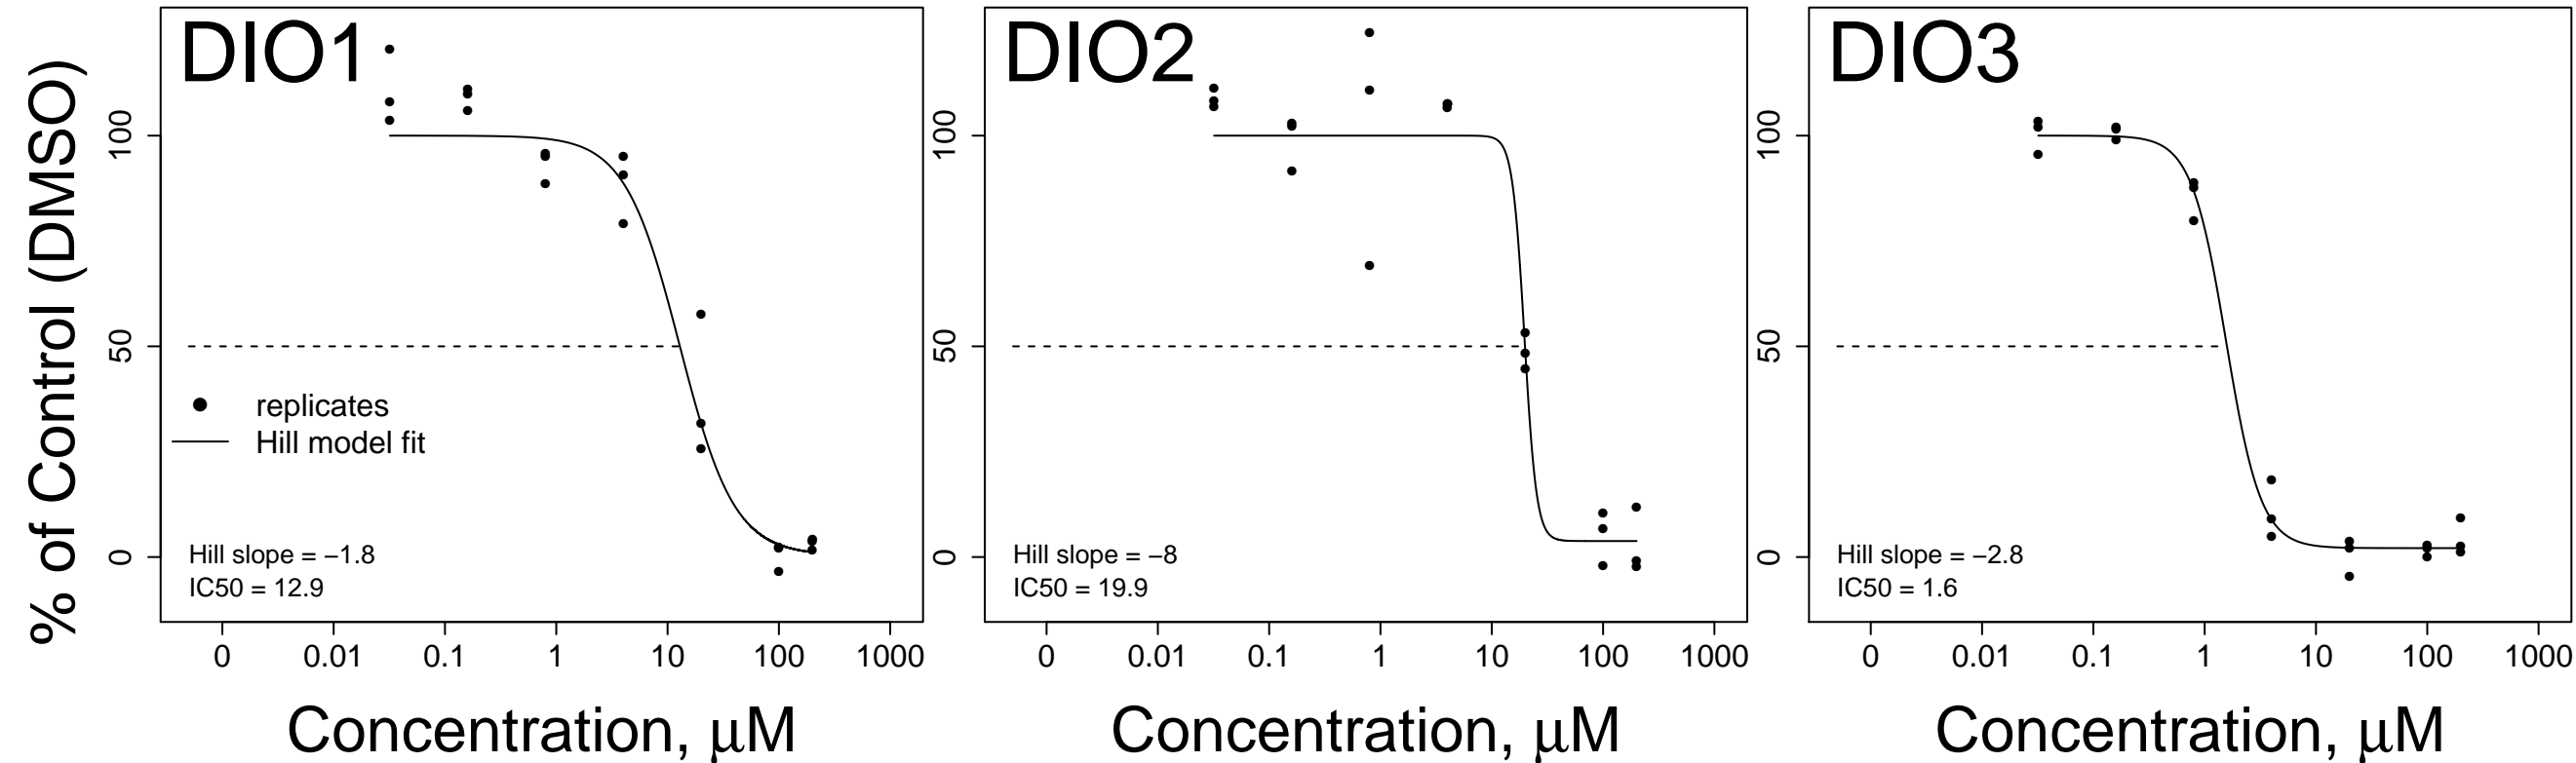

C.I. Acid Orange 8, monosodium salt CASRN: 5850-86-2

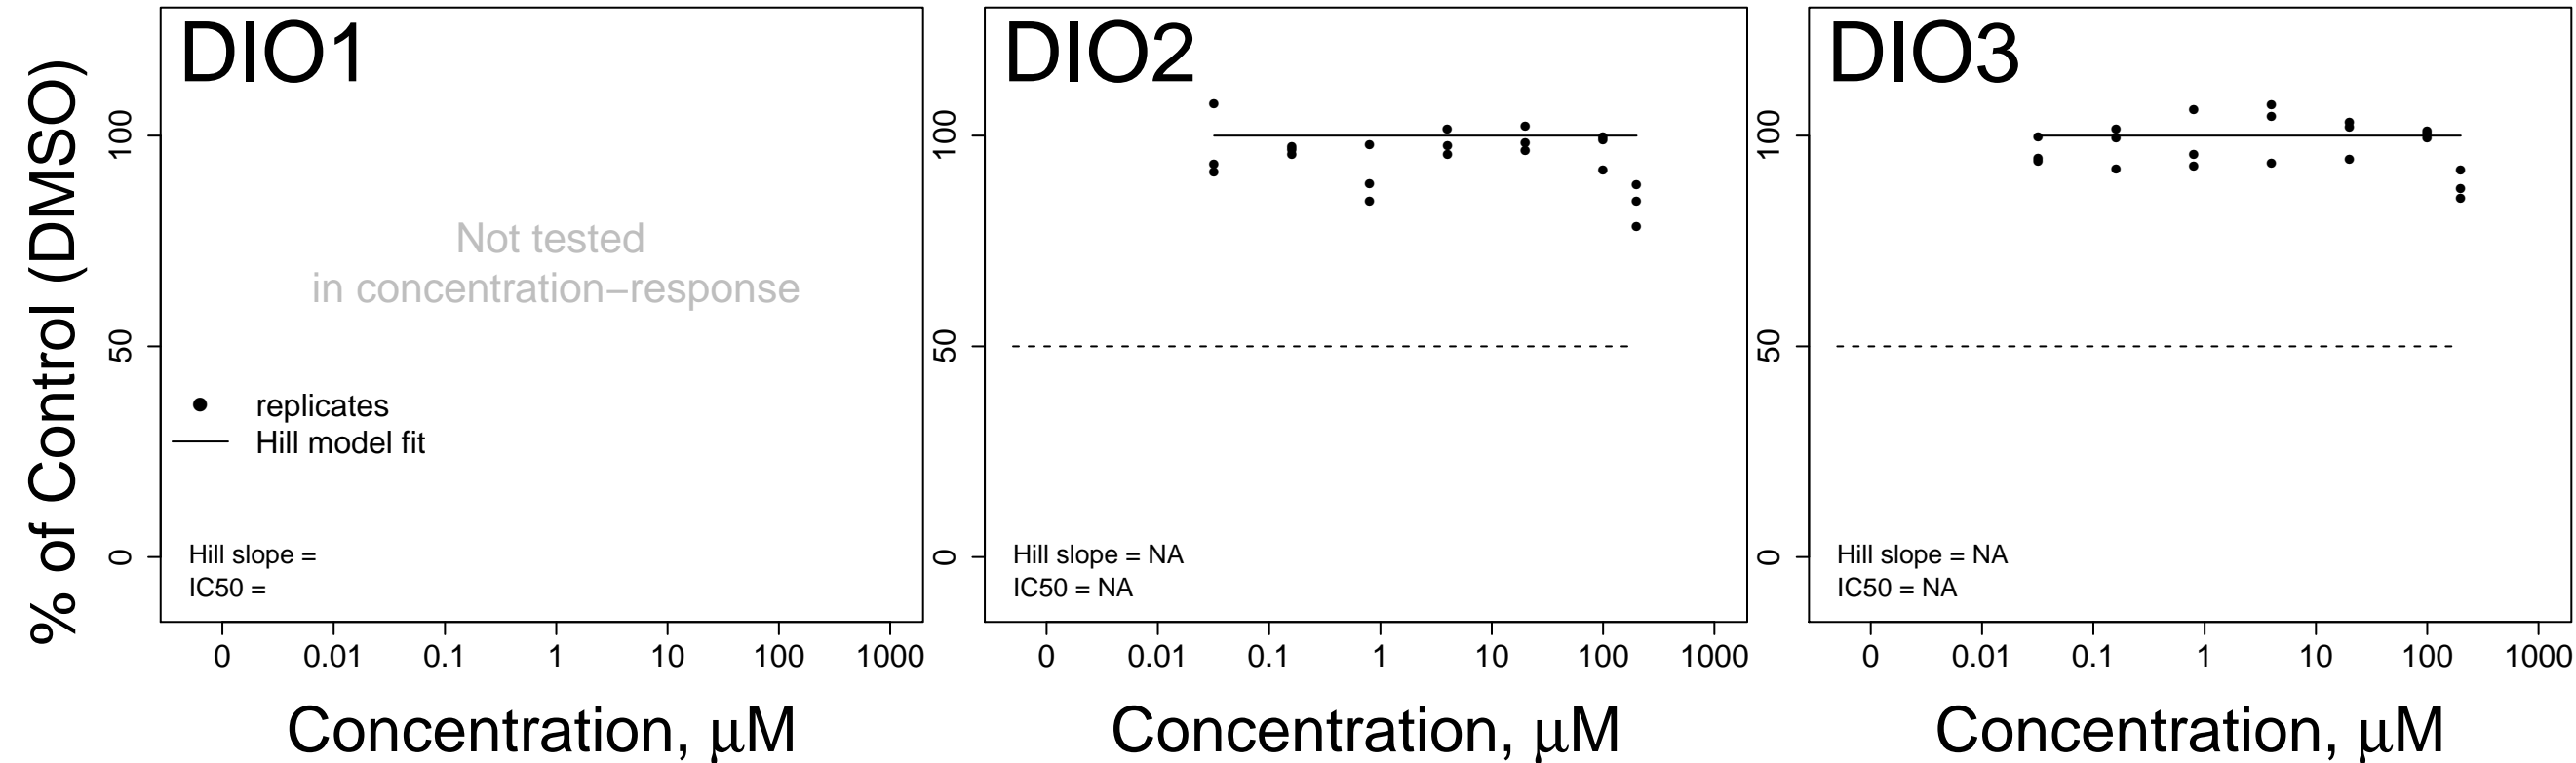

2-Chloro-N-phenylacetamide CASRN: 587-65-5

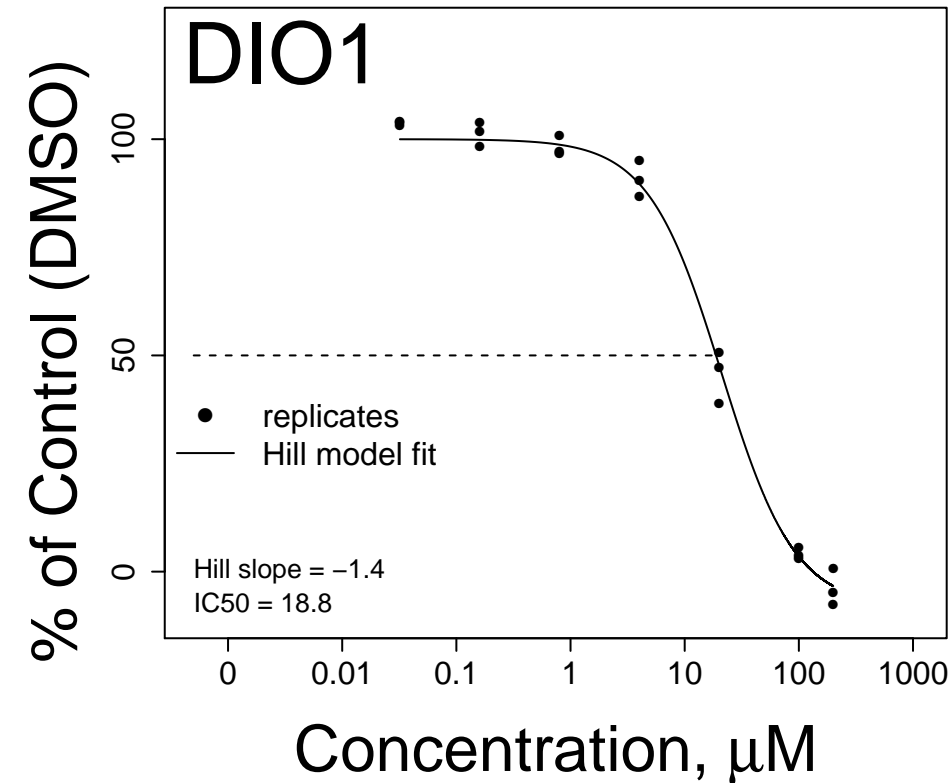

Tetradecanoic acid, 2,3-dihydroxypropyl ester CASRN: 589-68-4

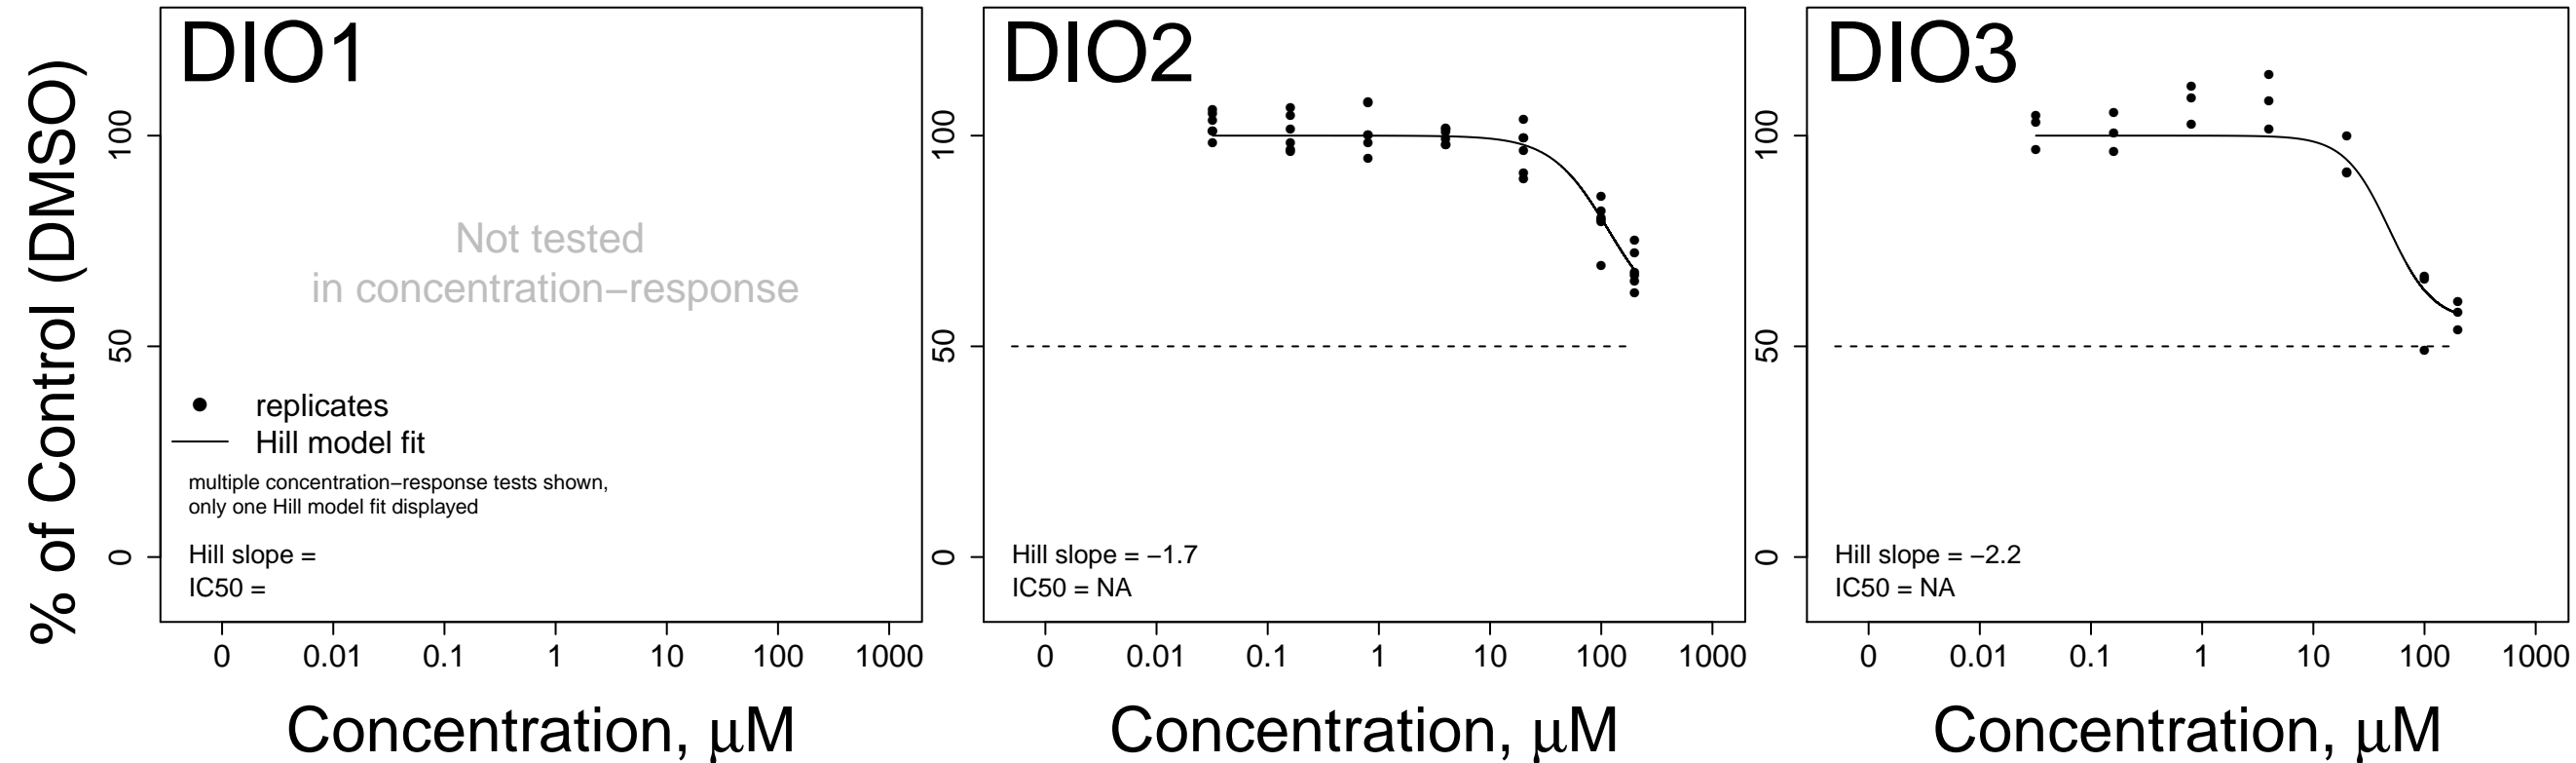

Laurocapram CASRN: 59227-89-3

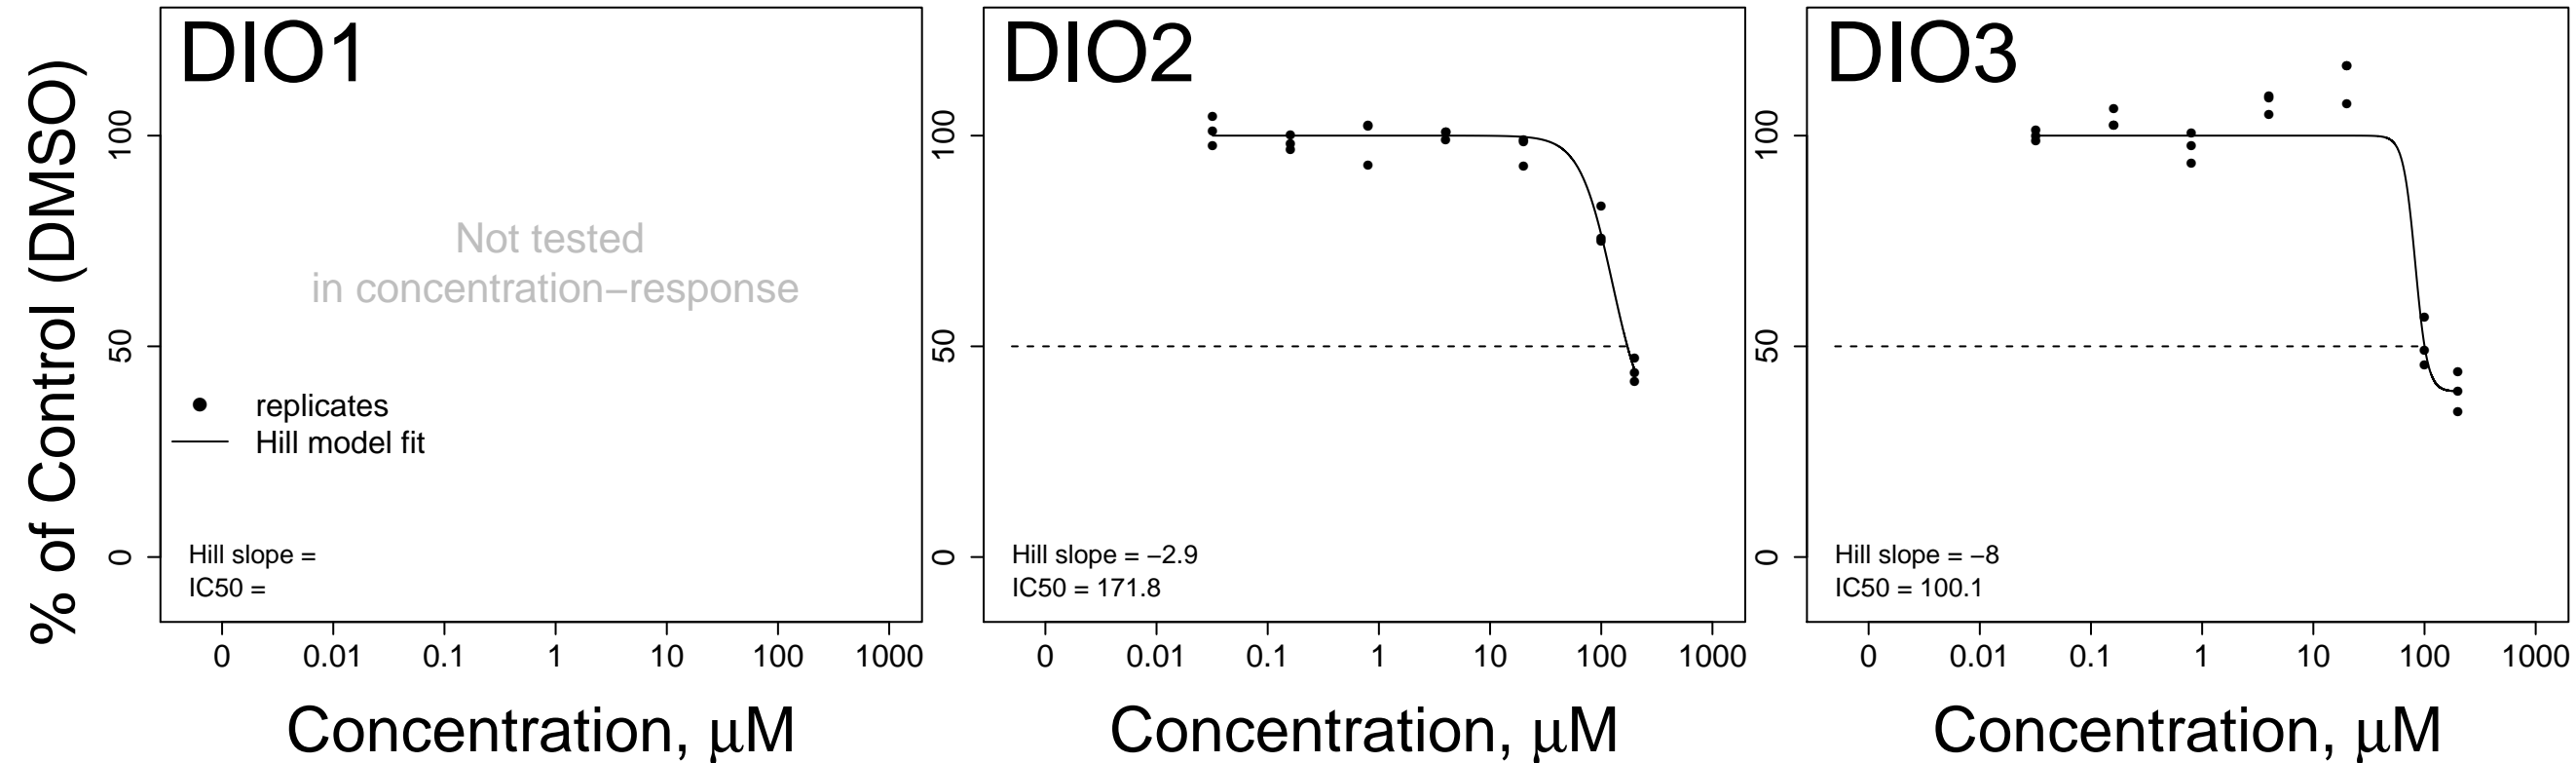

Linoleic acid CASRN: 60-33-3

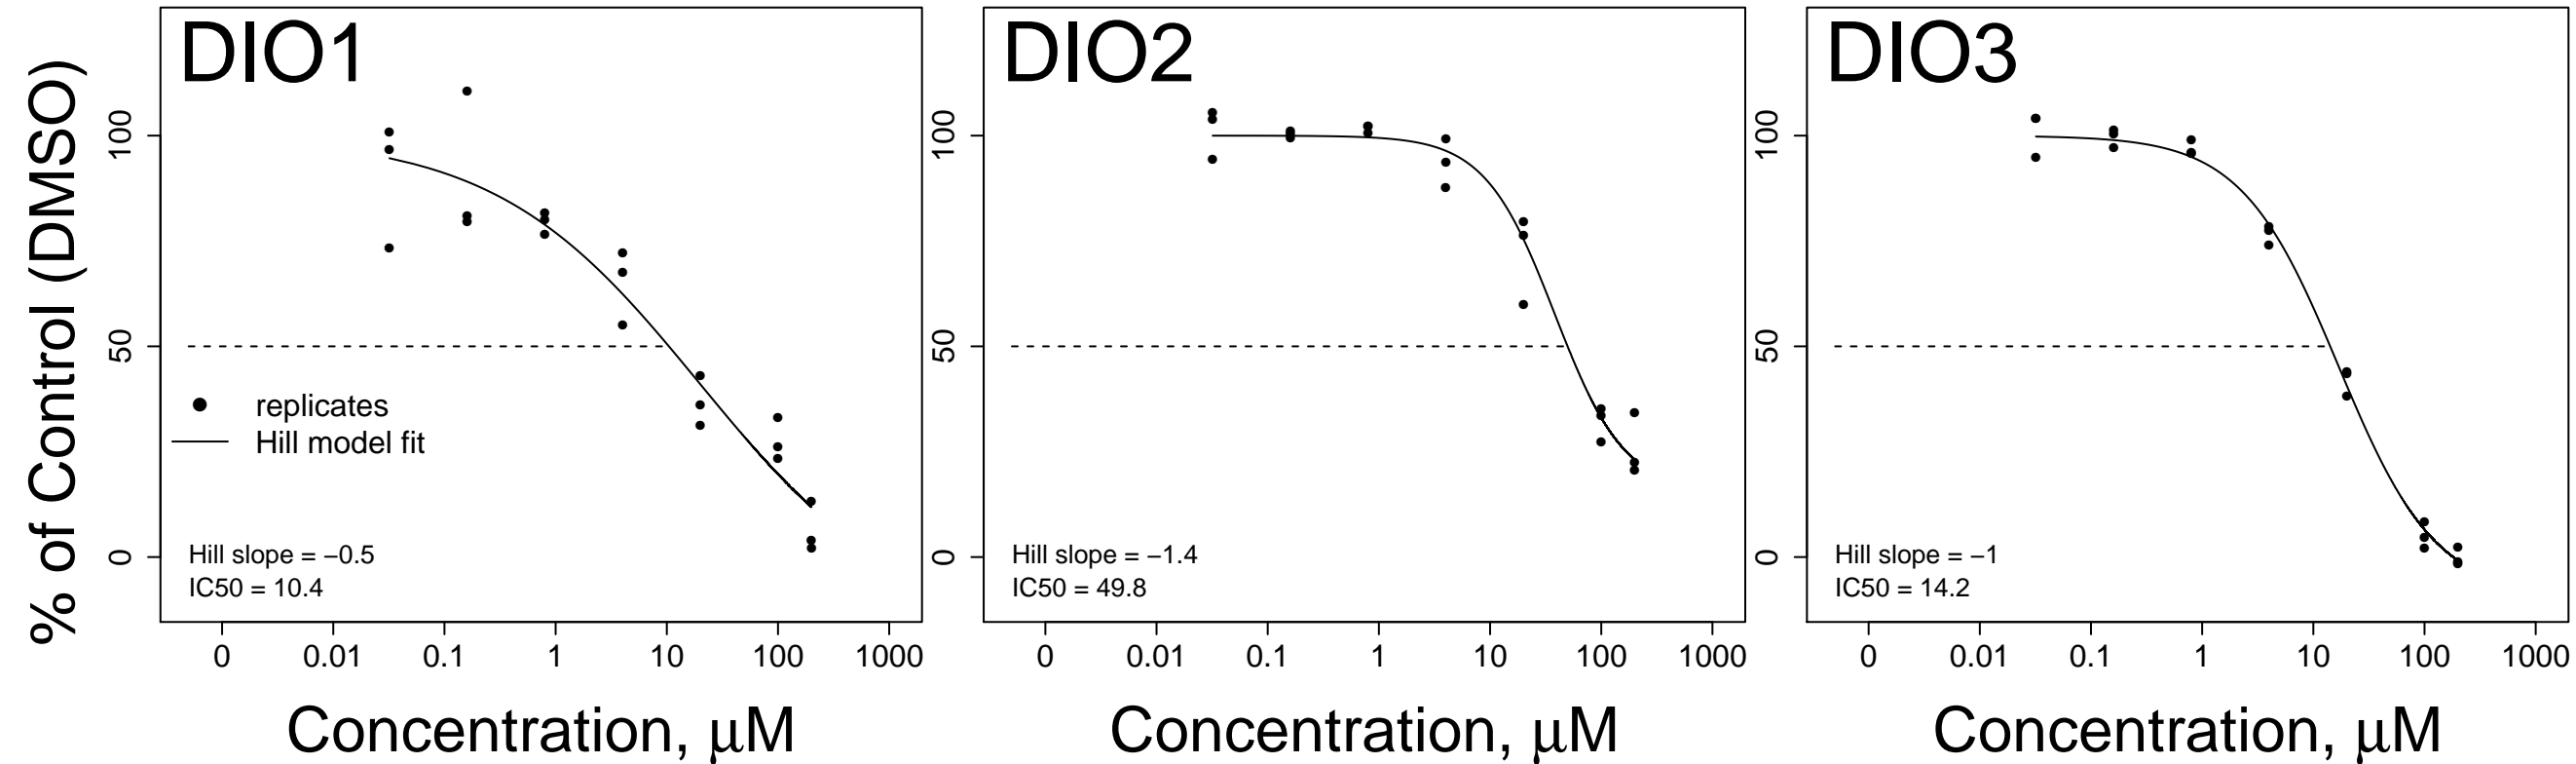



6-Hydroxy-2-naphthyl disulfide CASRN: 6088-51-3

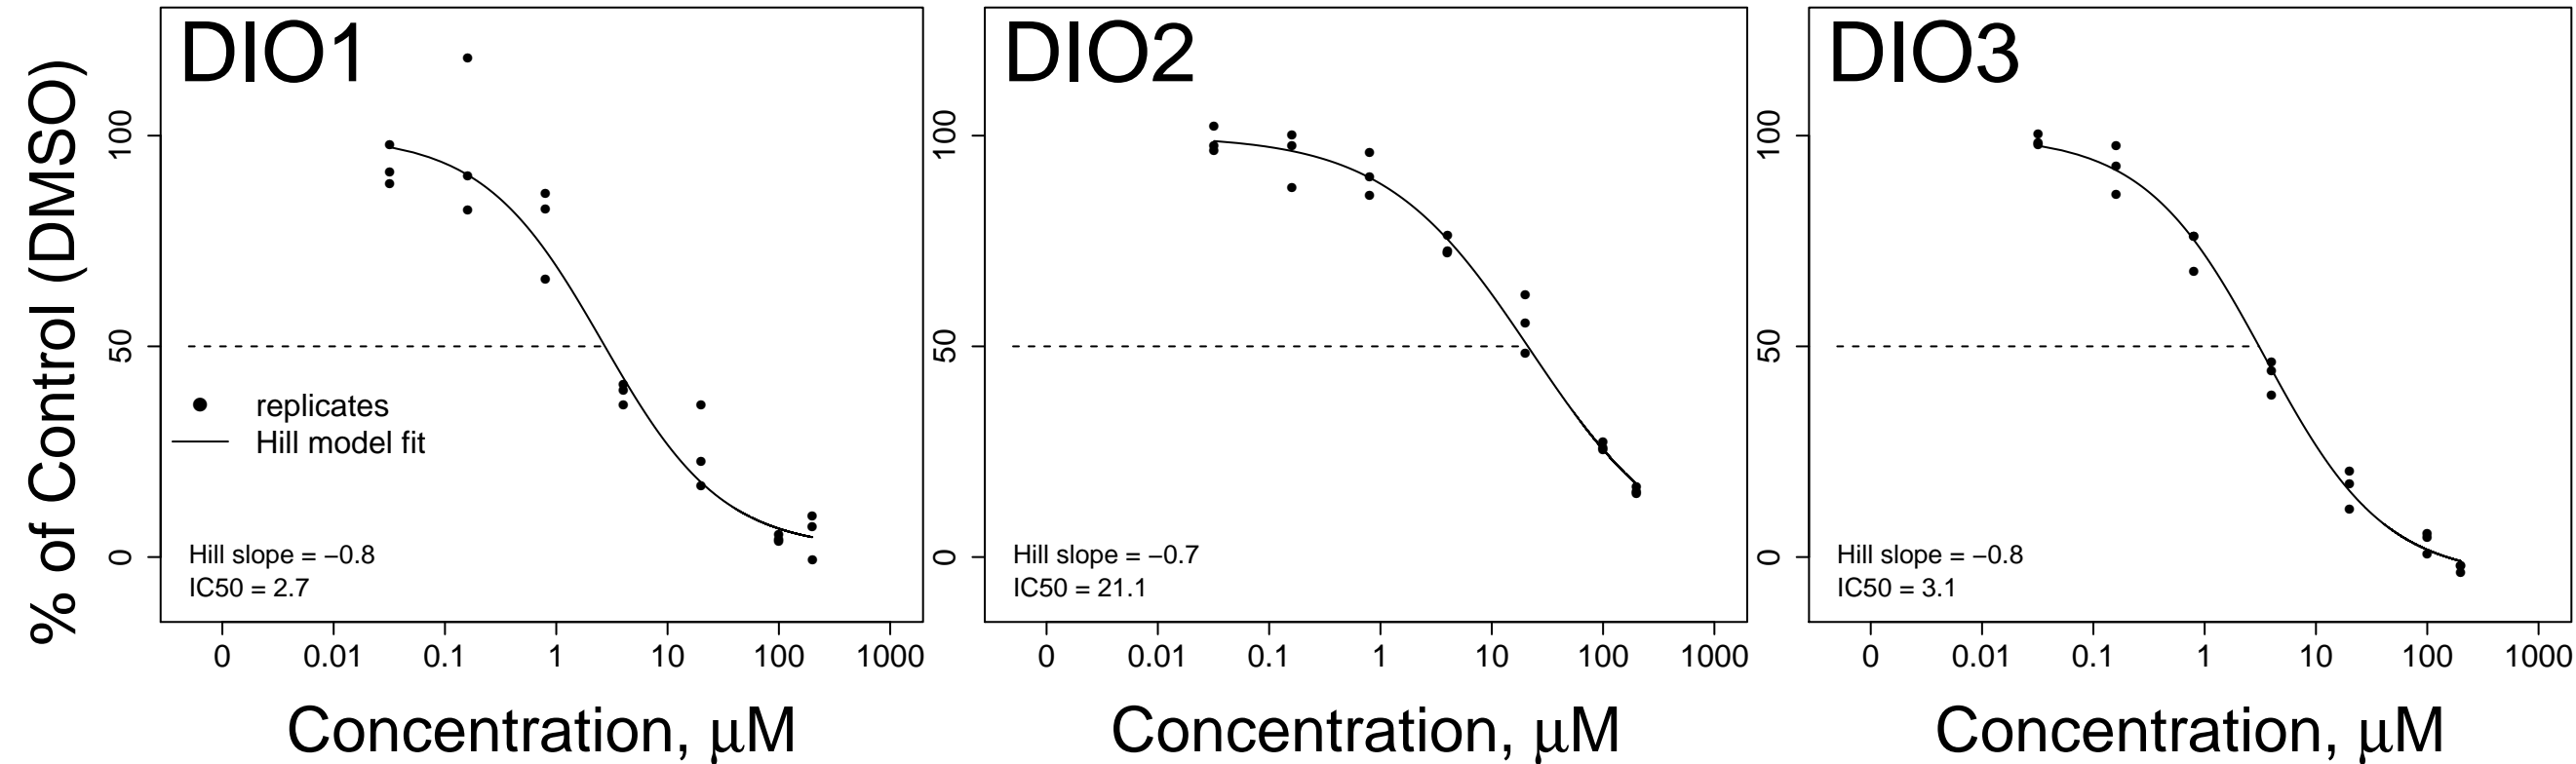

Sodium 2-phenylphenate tetrahydrate CASRN: 6152-33-6

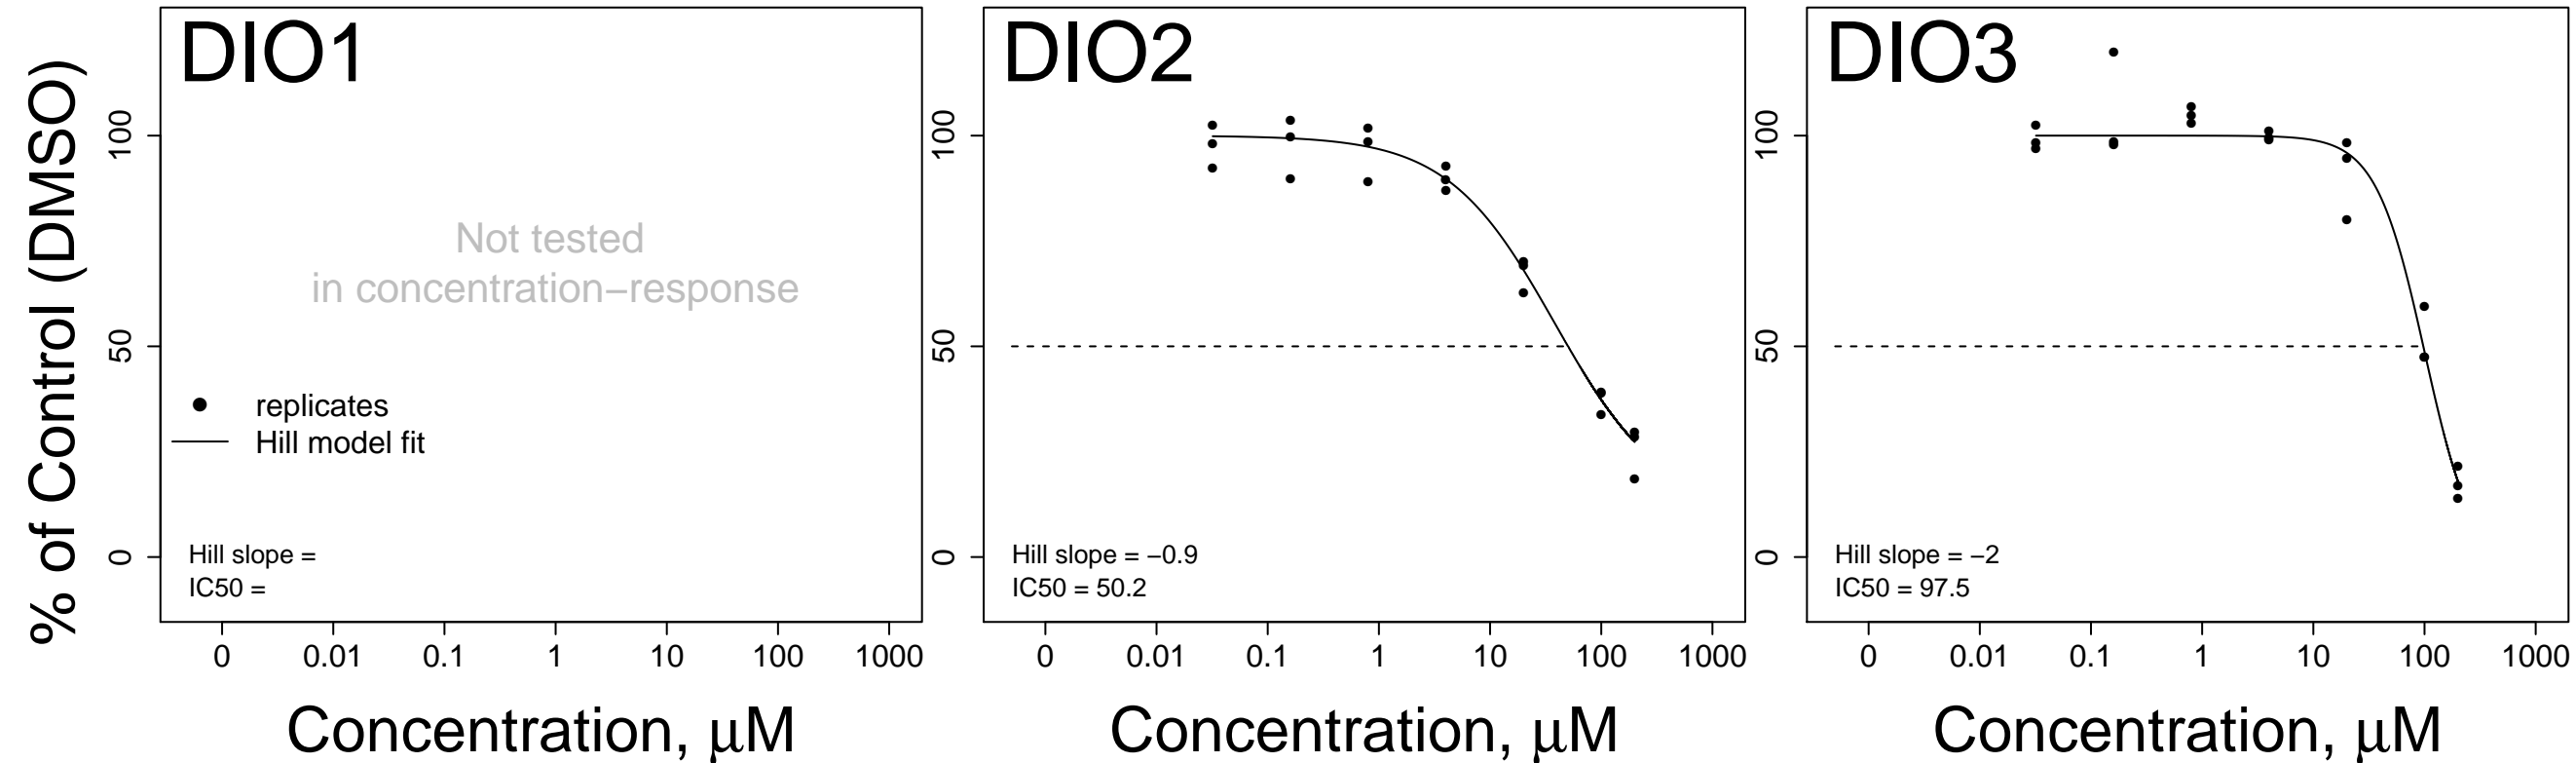

Benzyl-C8-18-alkyldimethylammonium chlorides CASRN: 63449-41-2

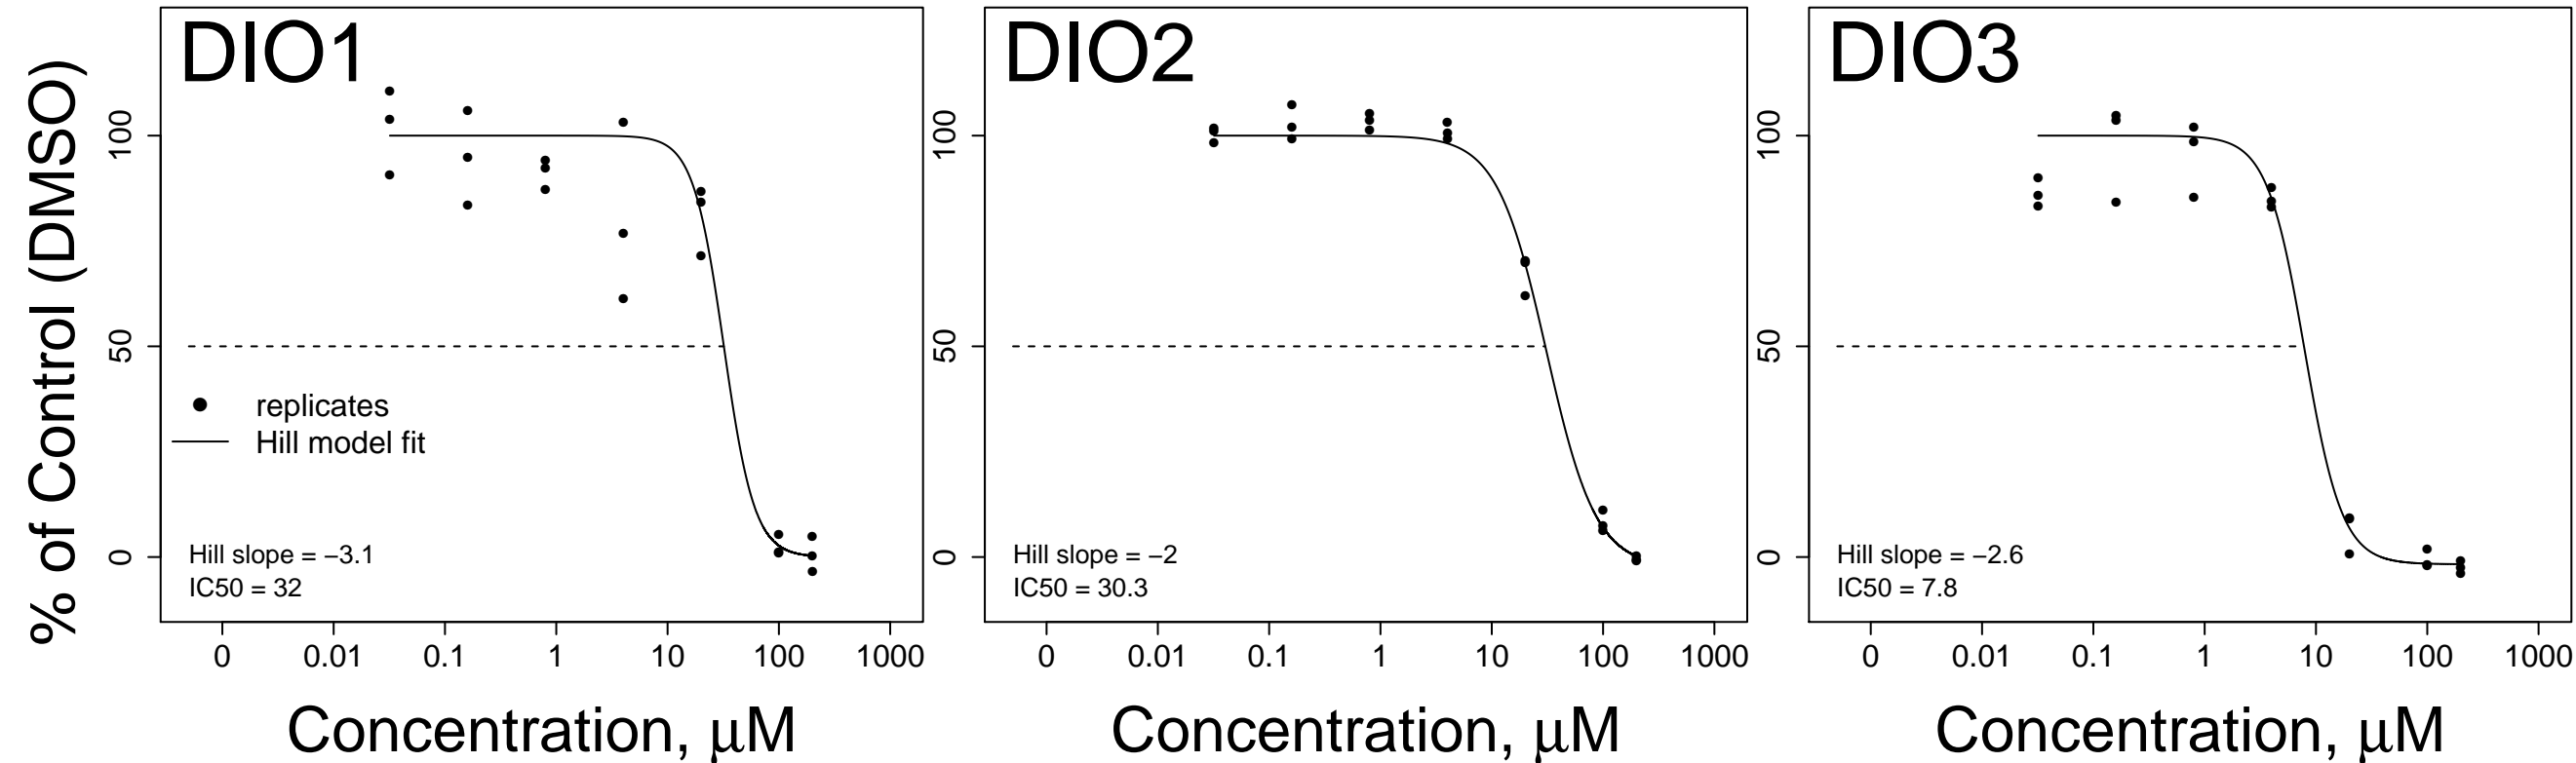

4,5-Dichloro-2-octyl-3(2H)-isothiazolone CASRN: 64359-81-5

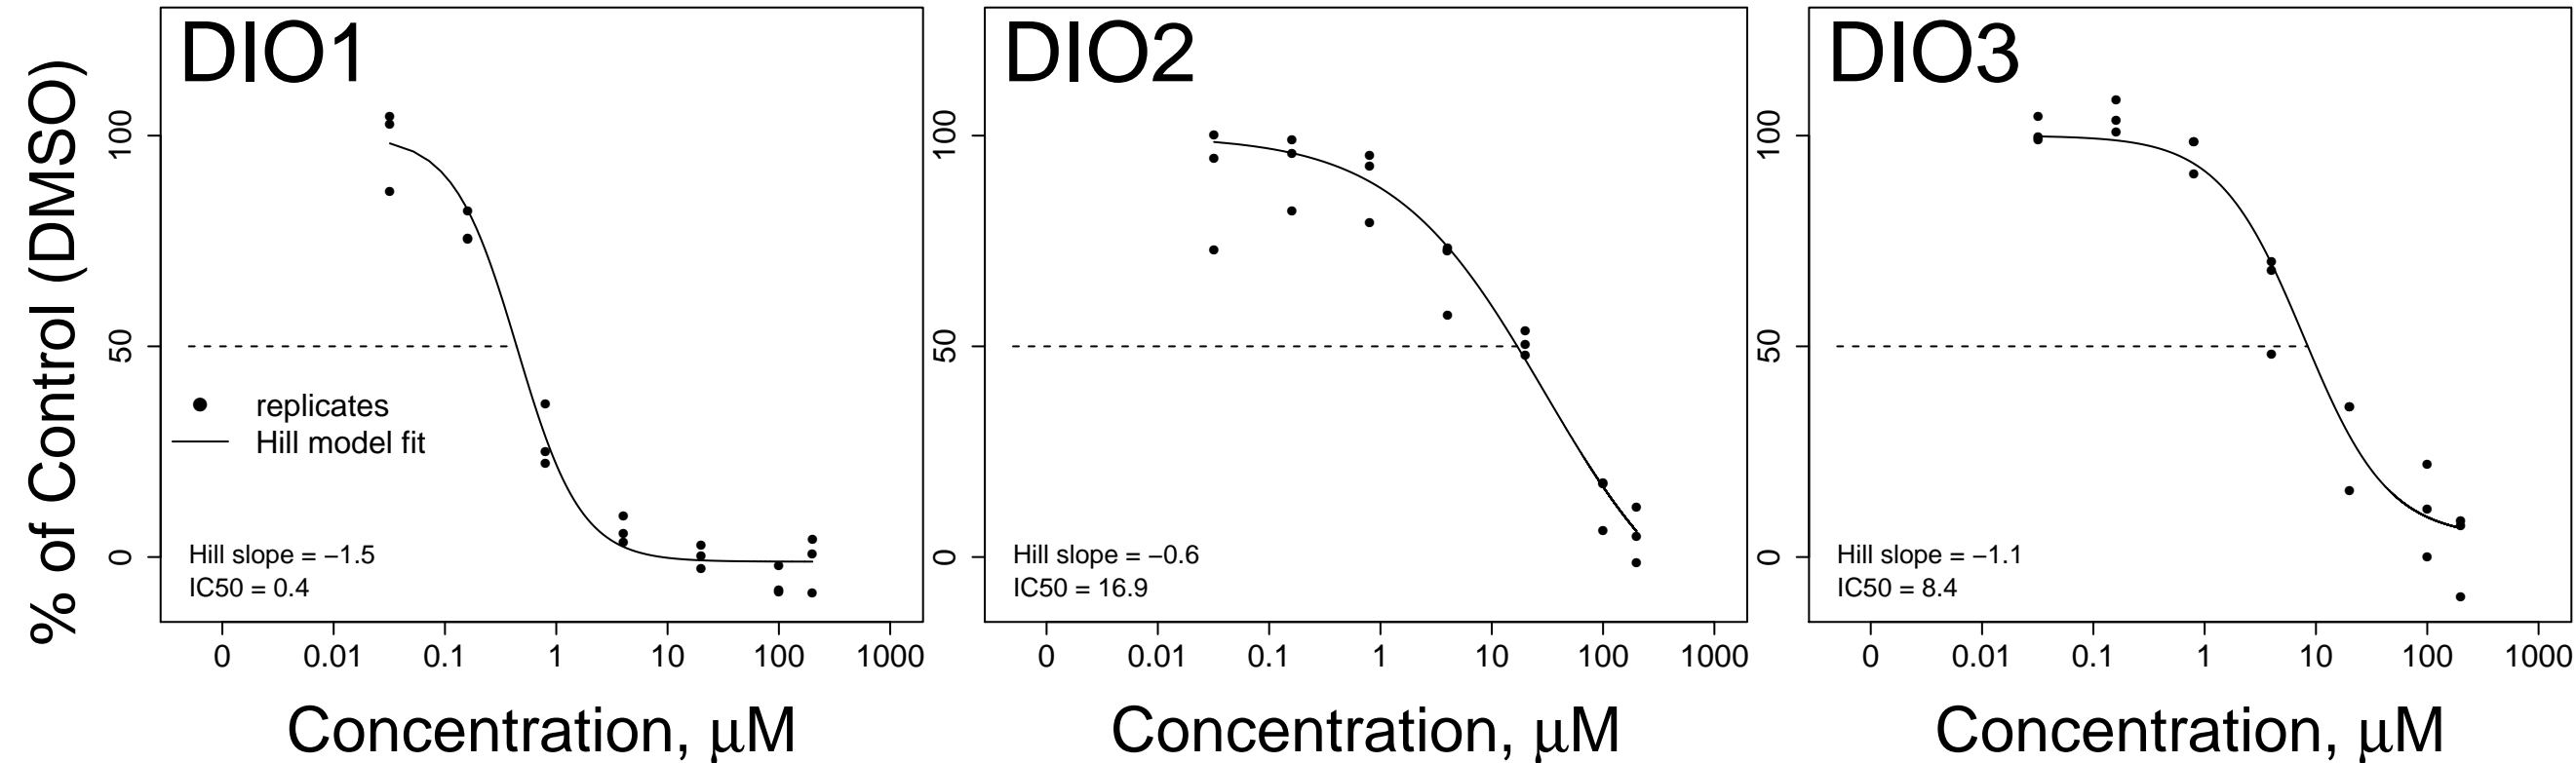

Morin hydrate CASRN: 654055-01-3

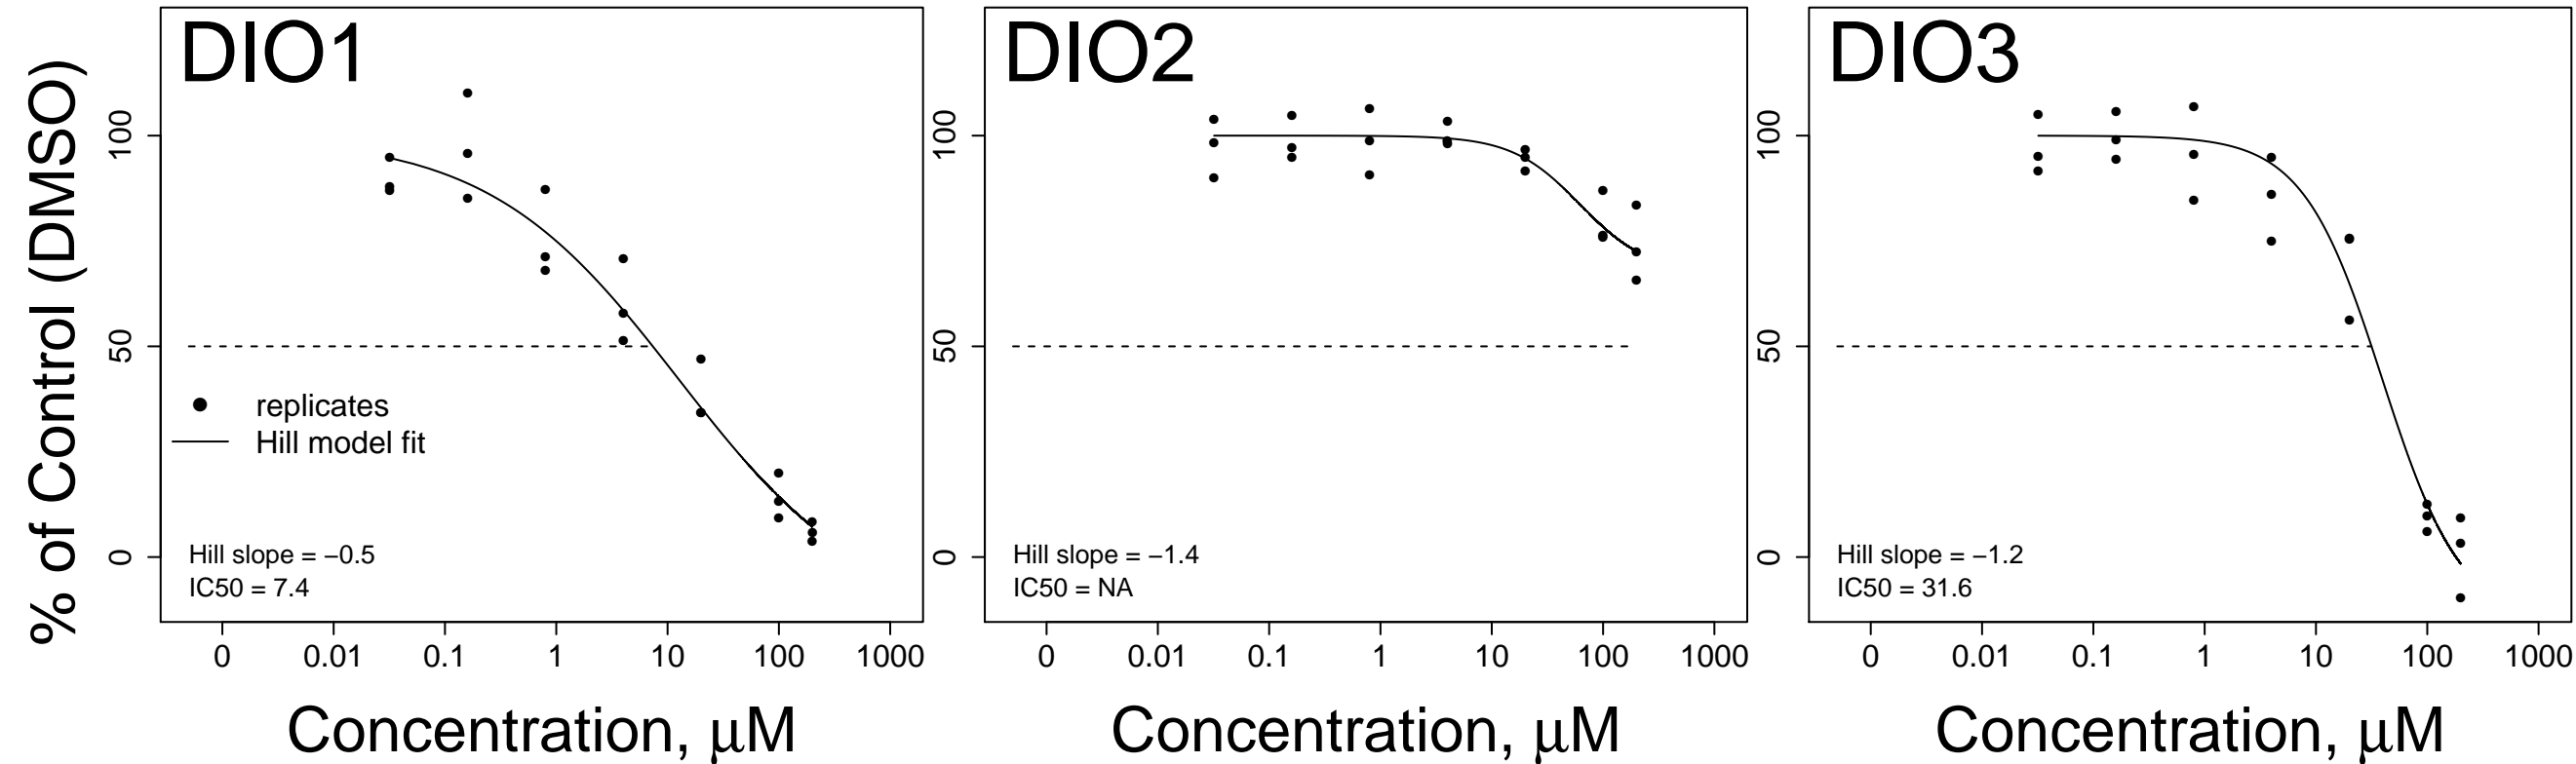

# Hydramethylnon CASRN: 67485-29-4

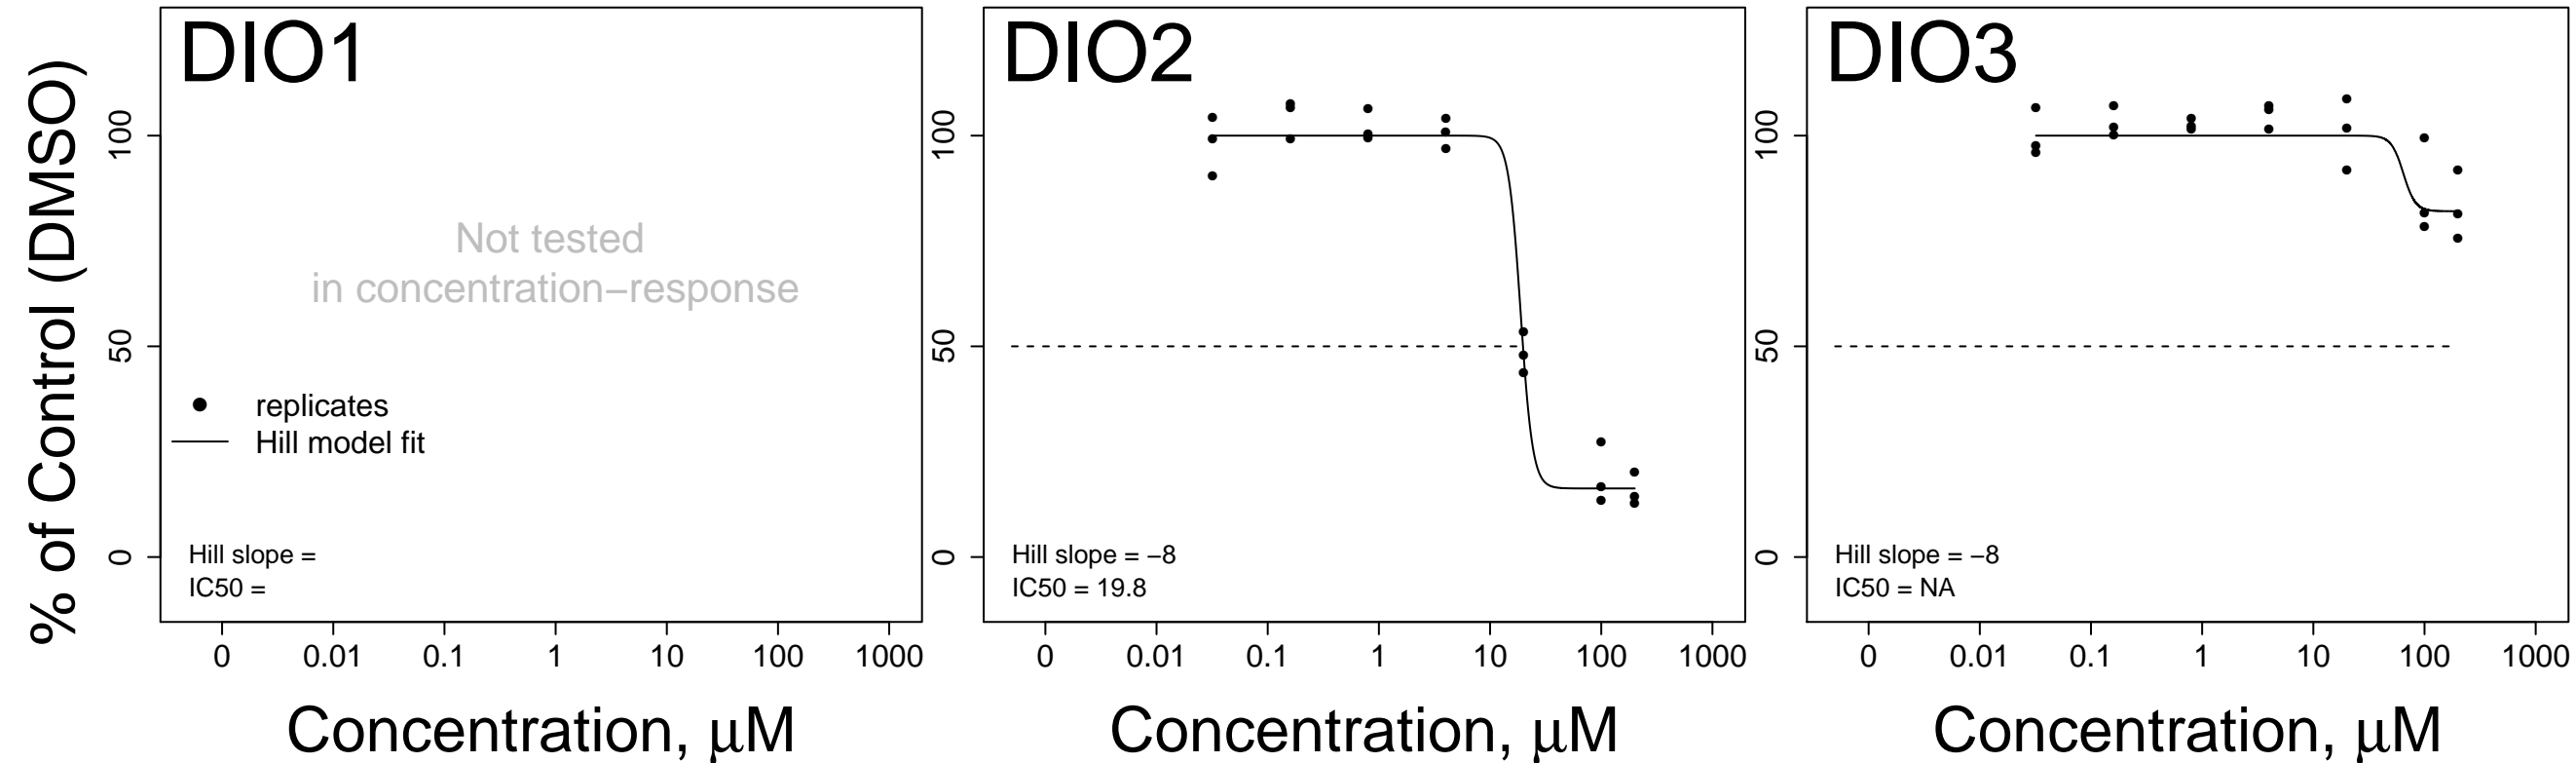

(Dicyclopentadienyloxy)ethyl methacrylate CASRN: 68169-03-9

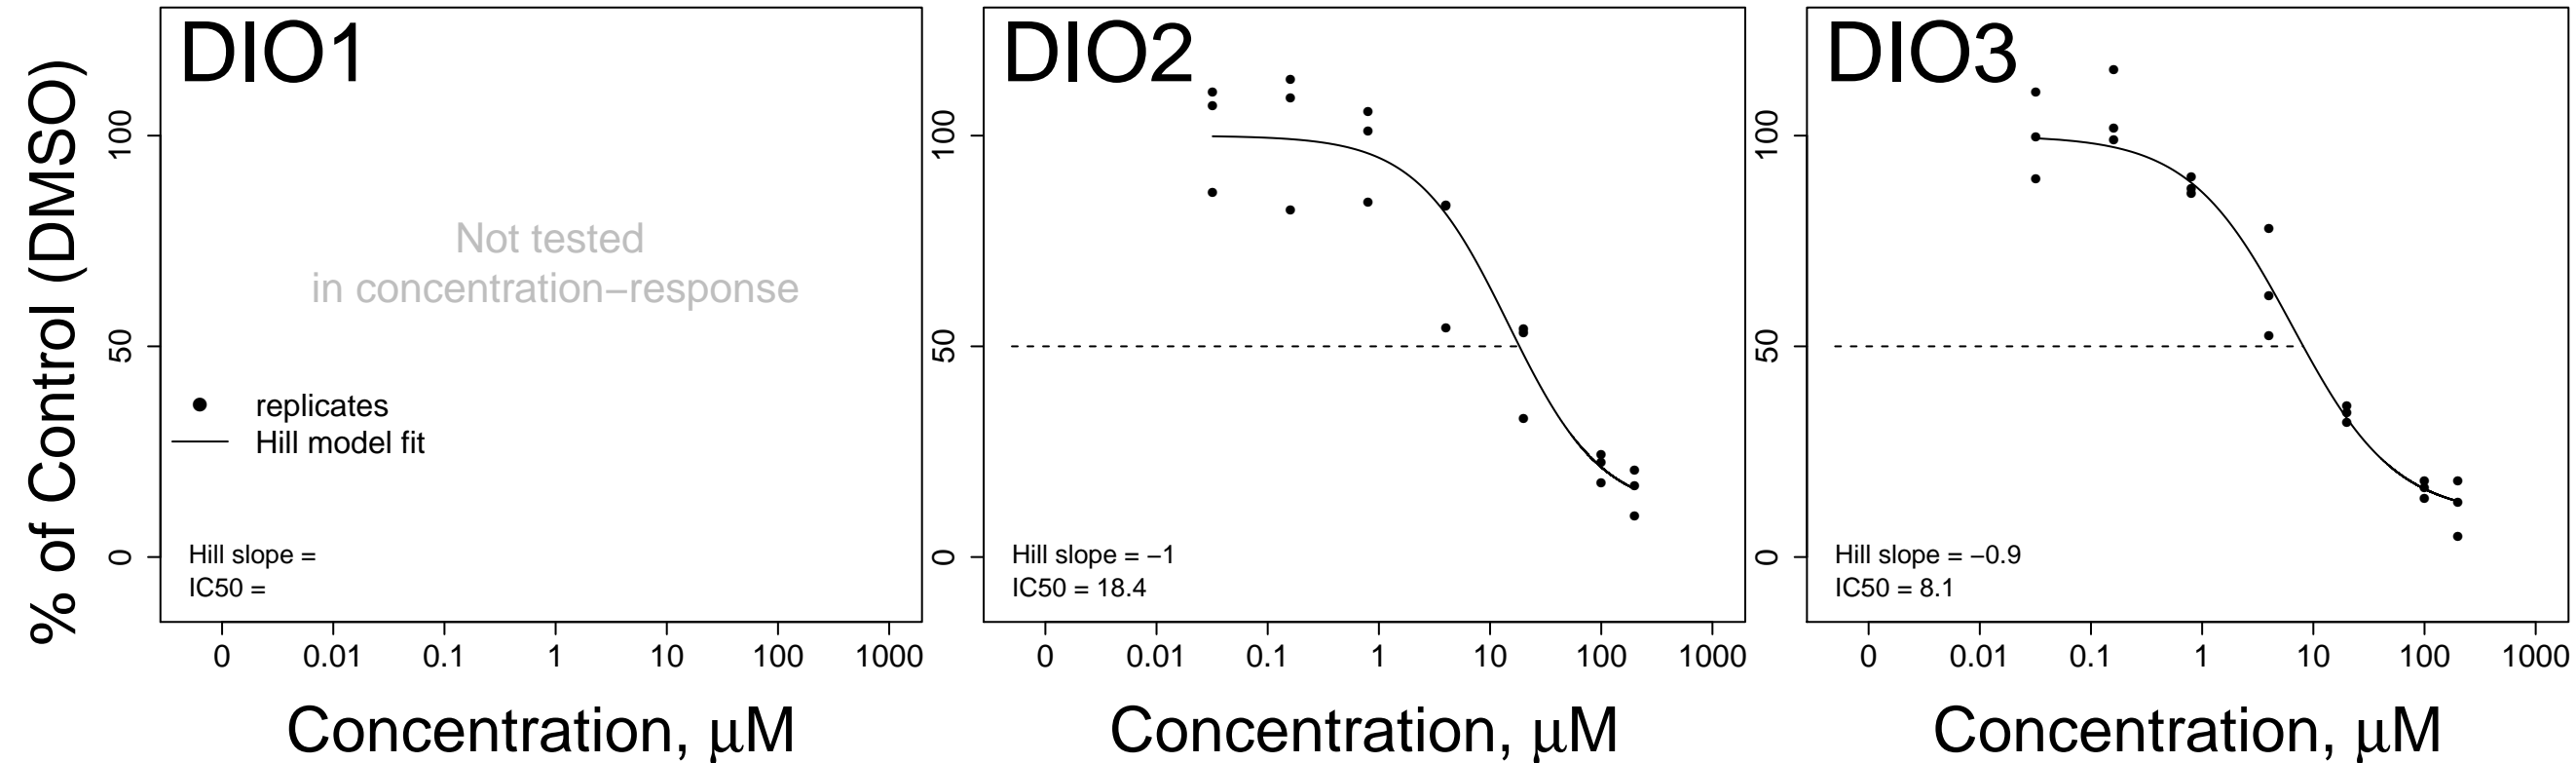

Acid Orange 156 CASRN: 68555-86-2

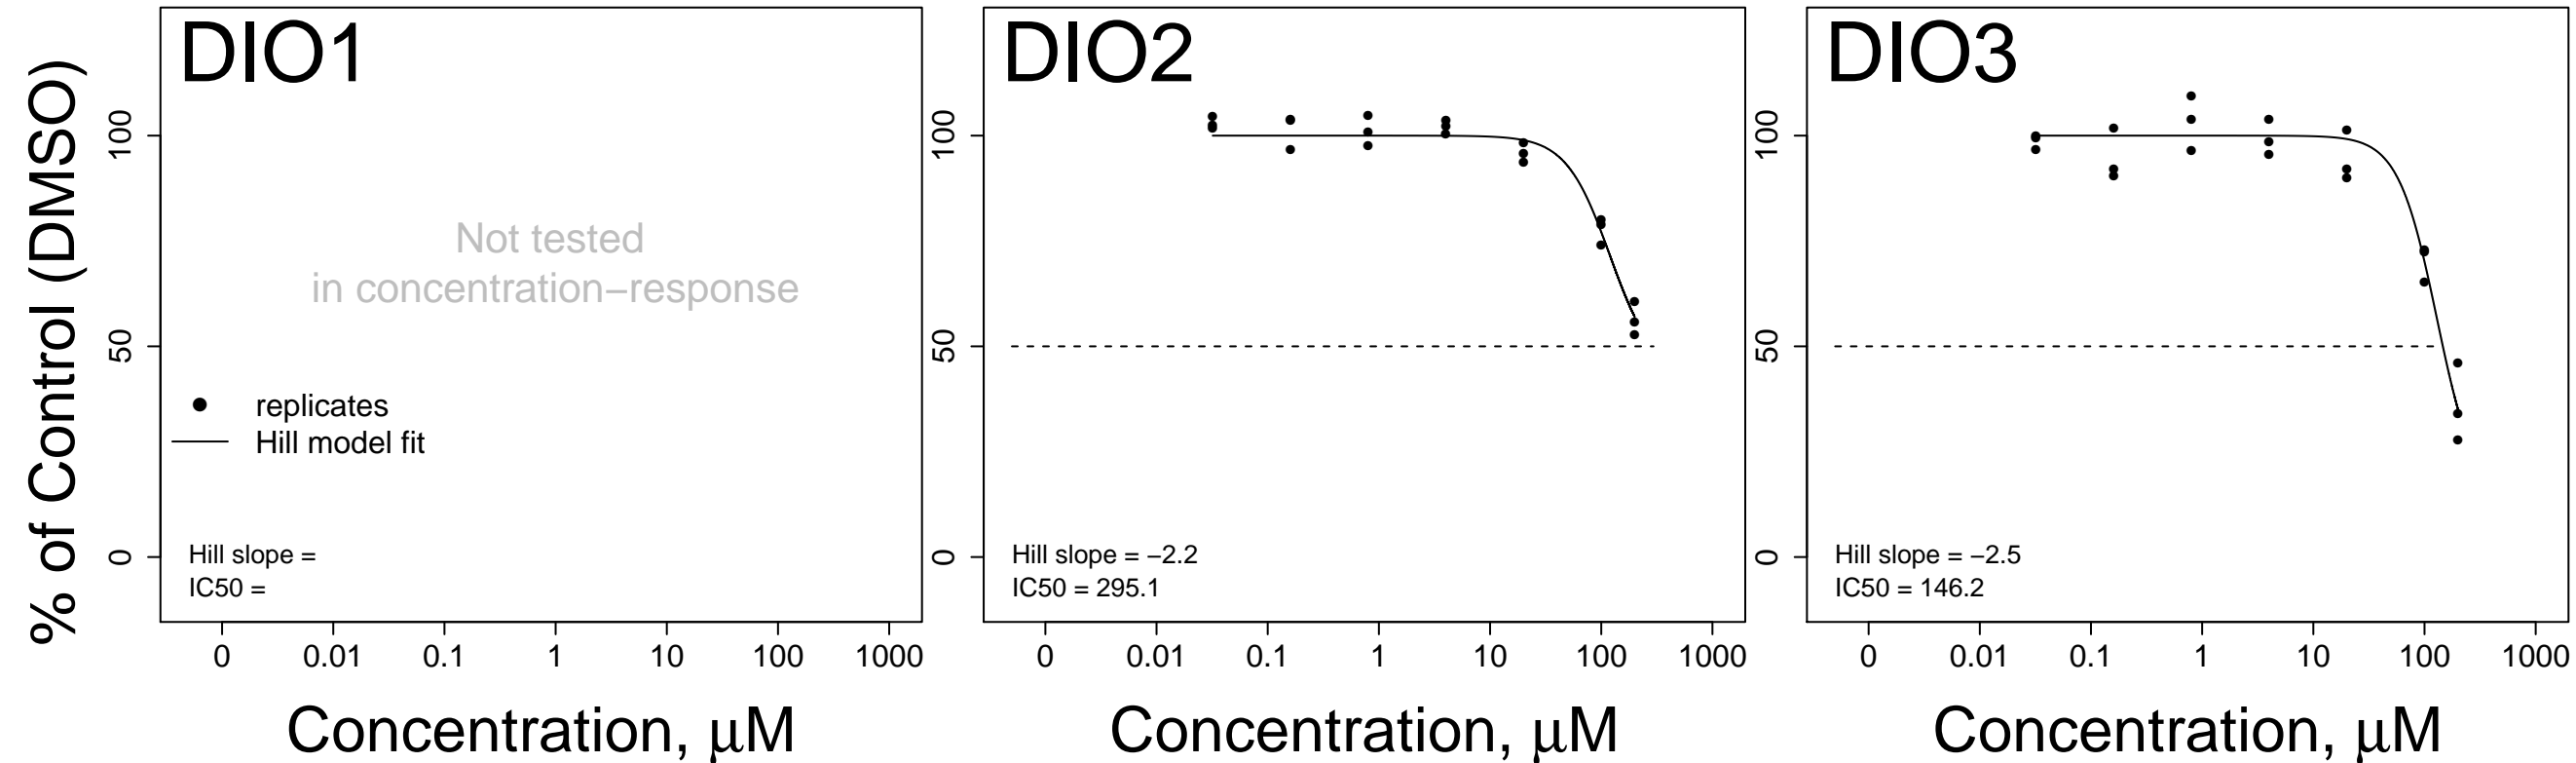



C12-14-Alkyl glycidyl ether CASRN: 68609-97-2

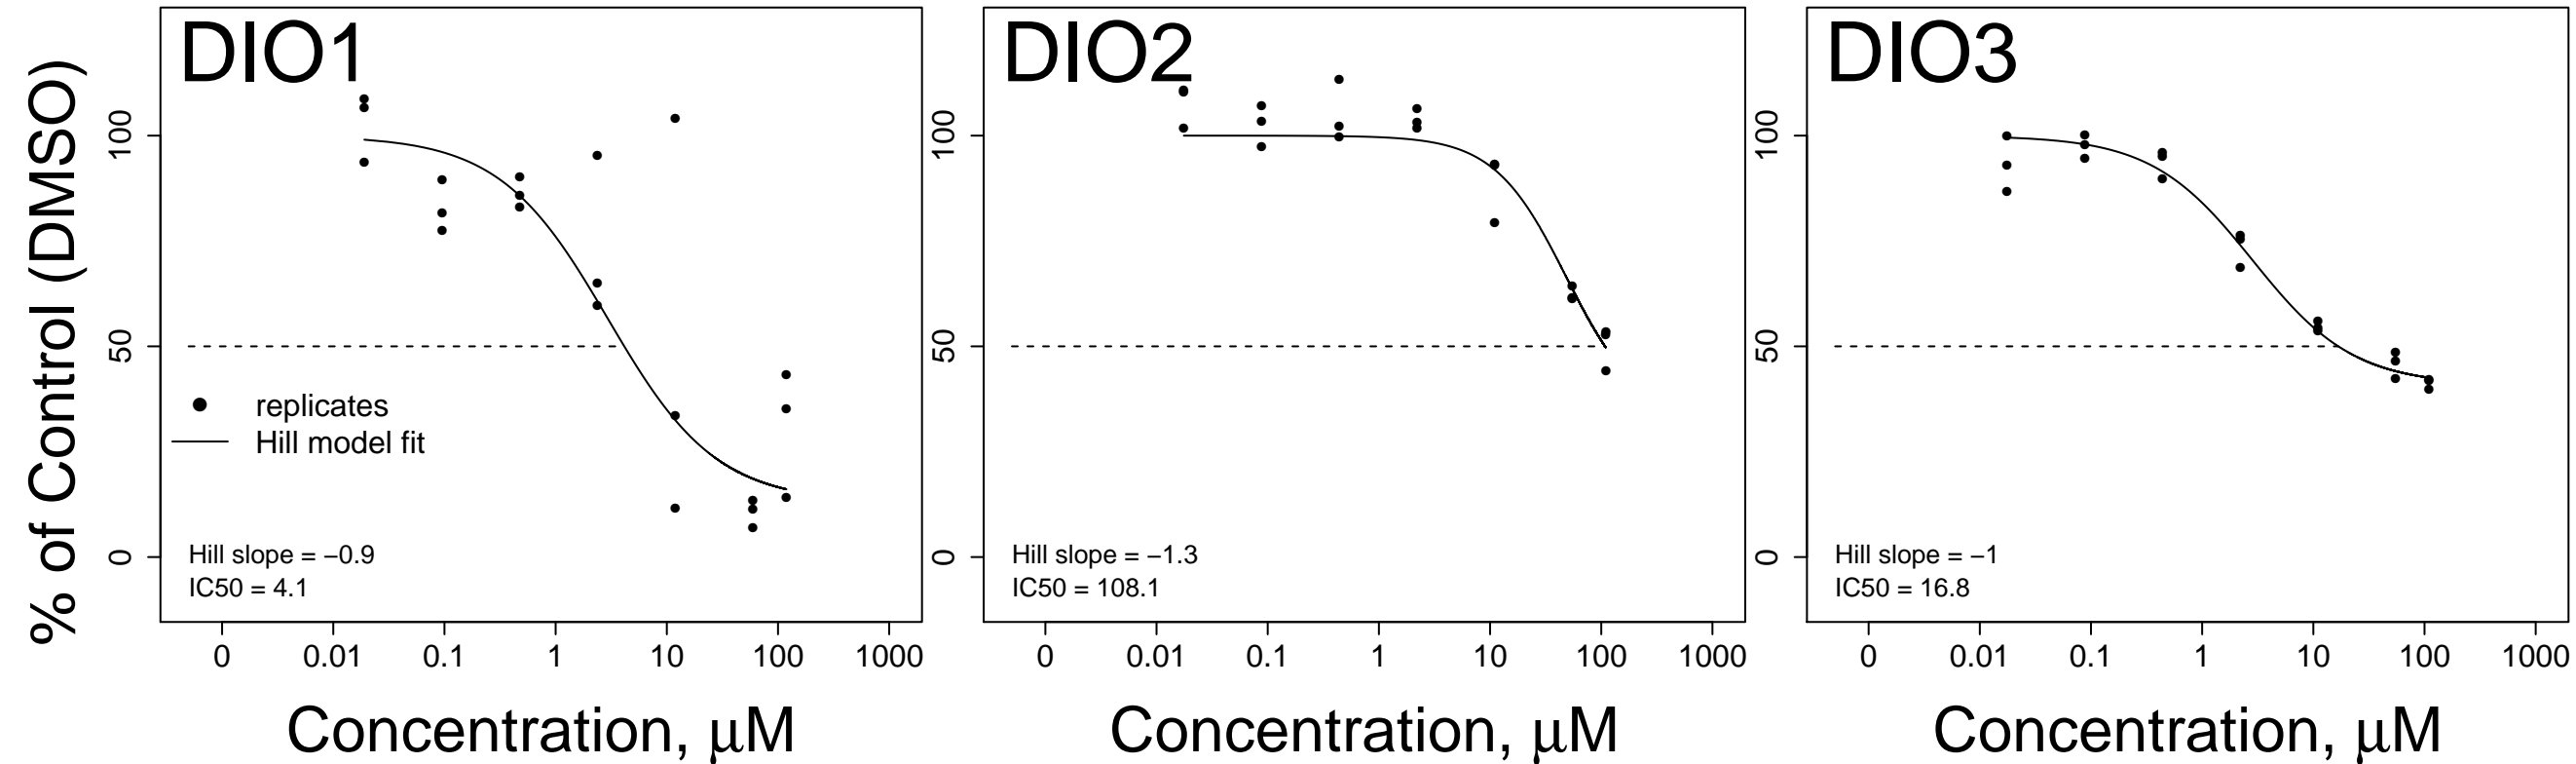

(2-Nitro-1-propenyl)benzene CASRN: 705-60-2

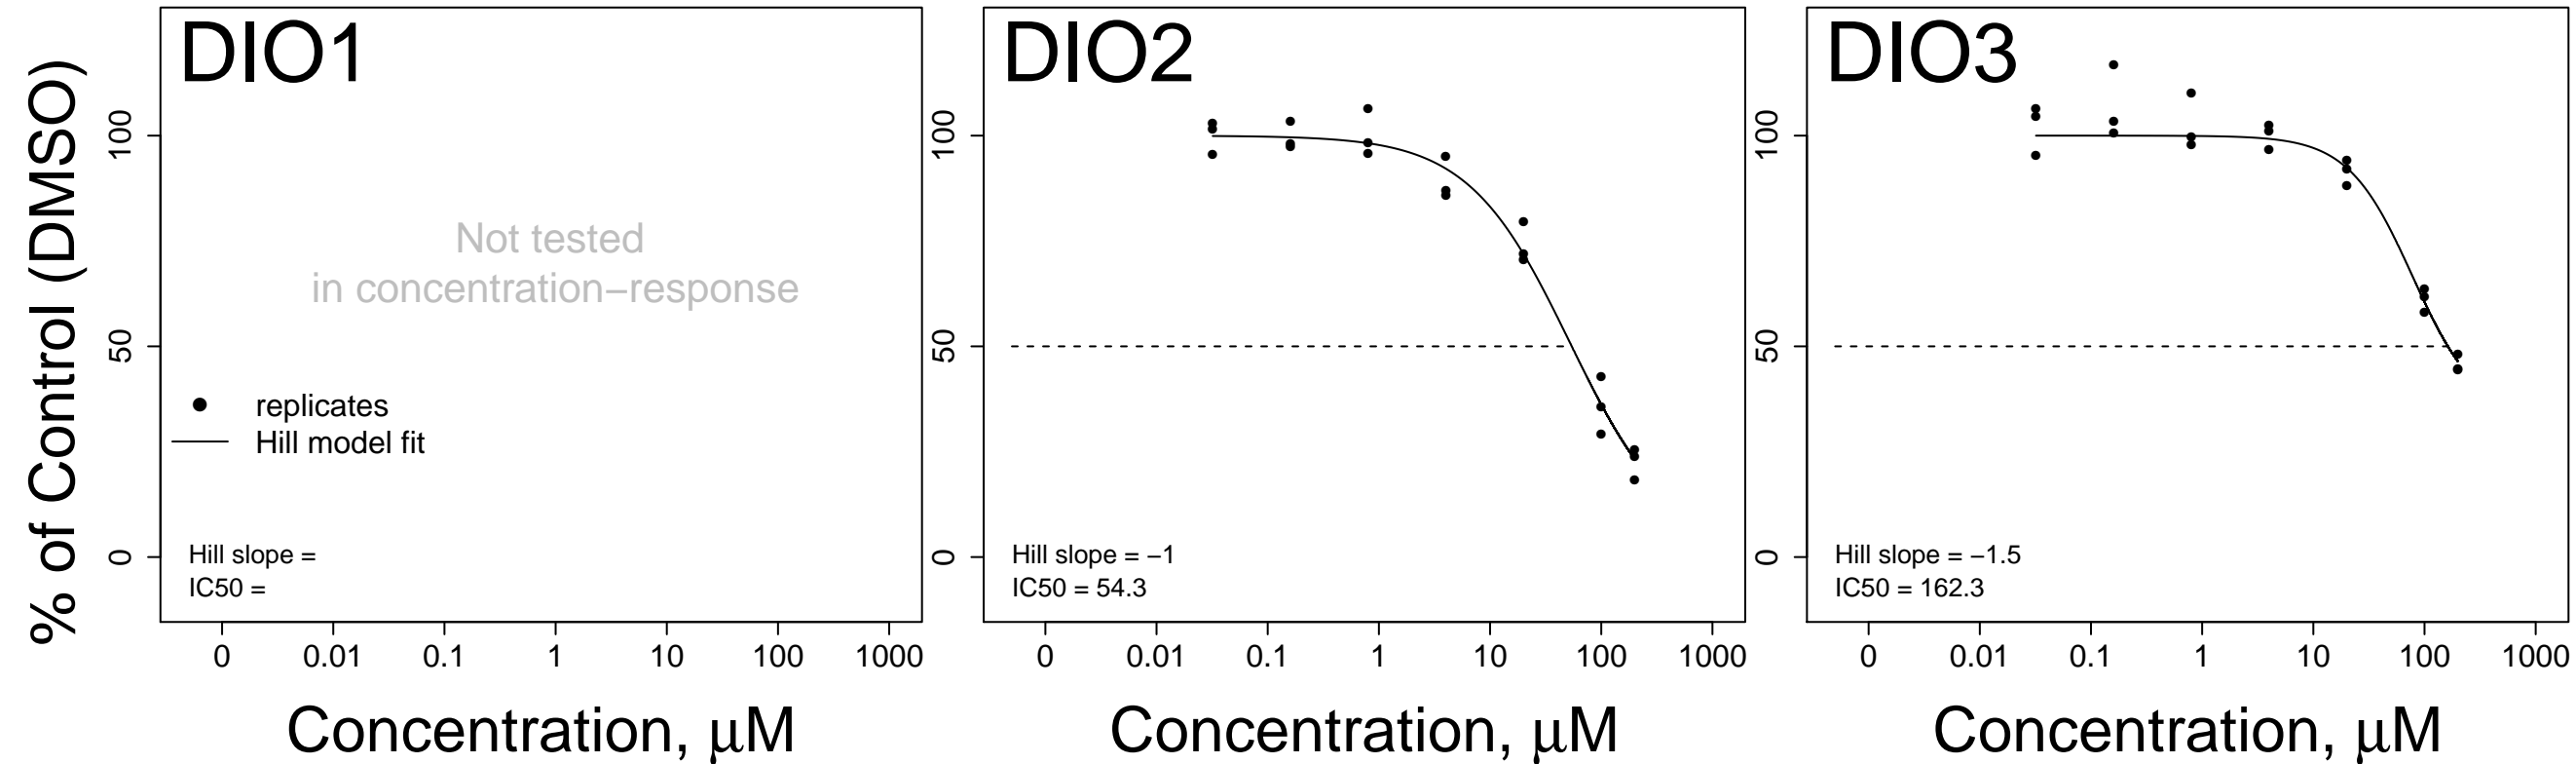

Fenoxaprop-P-ethyl CASRN: 71283-80-2

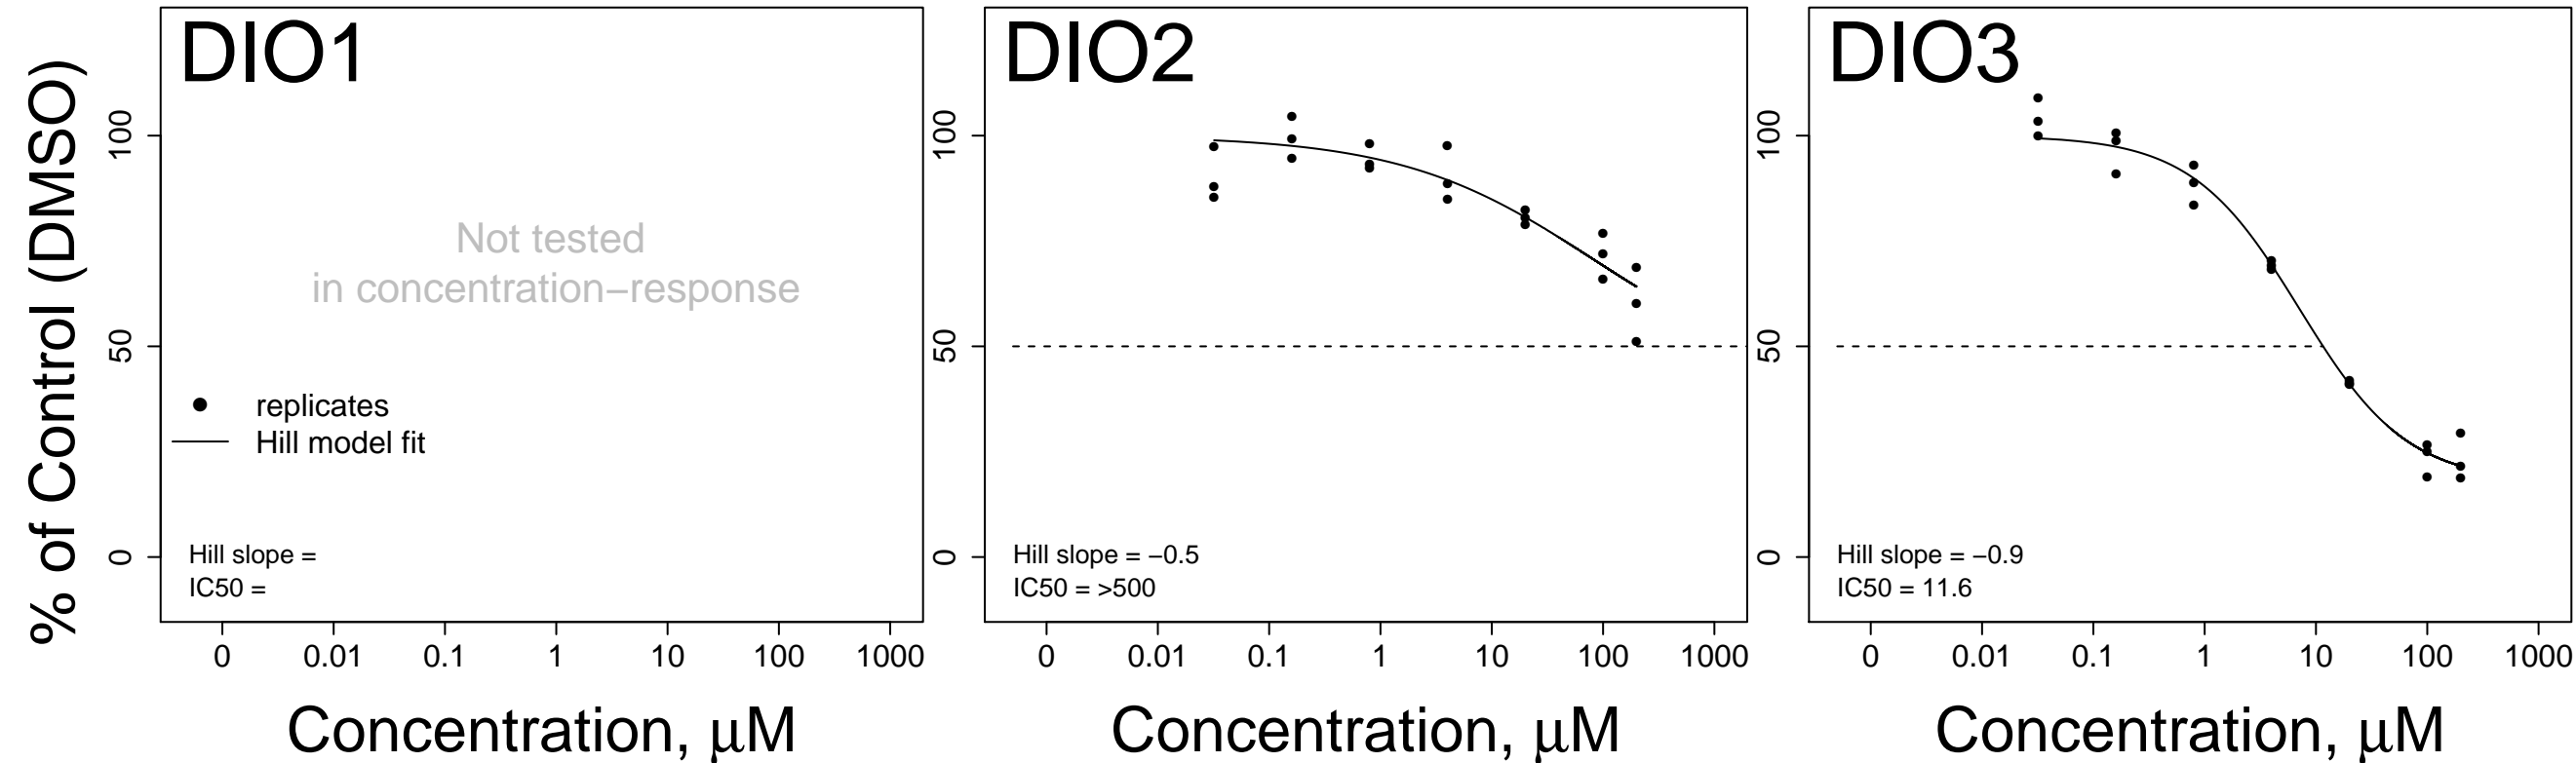

# Oxytetracycline CASRN: 79-57-2

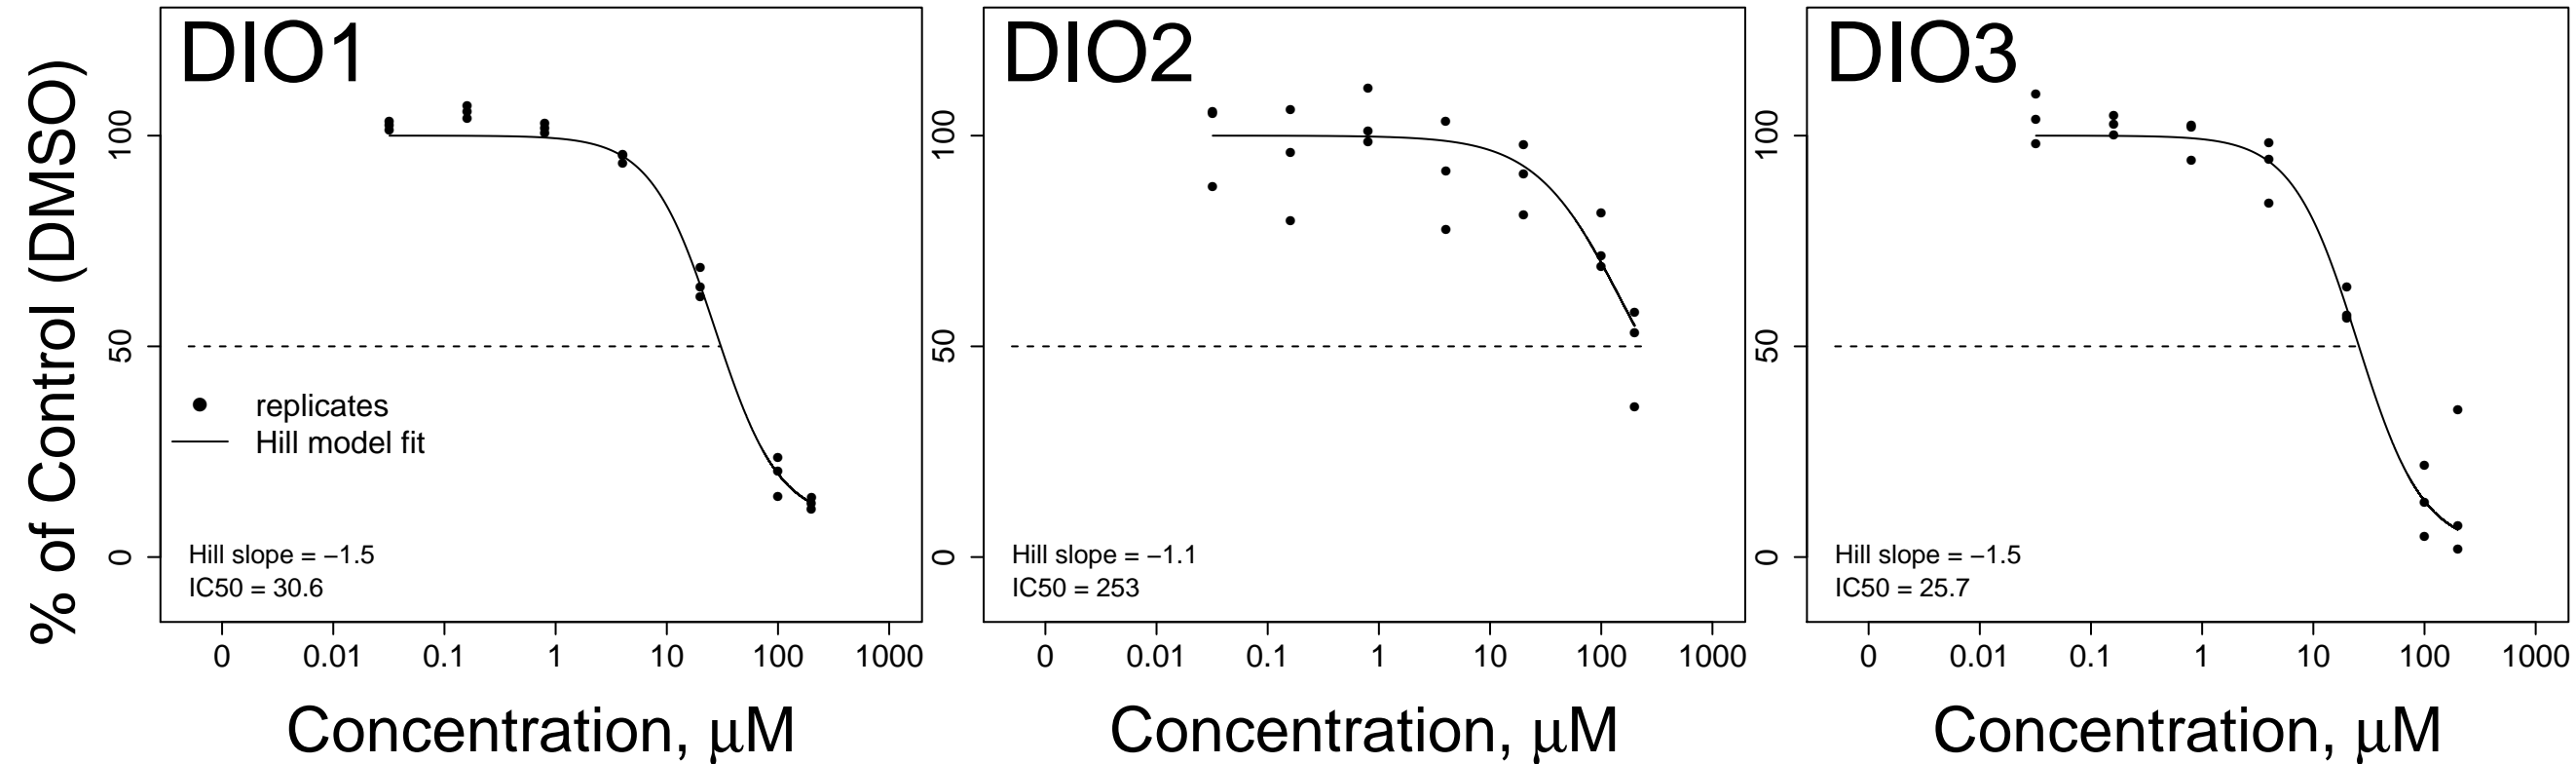

2,2',6,6'-Tetrachlorobisphenol A CASRN: 79-95-8

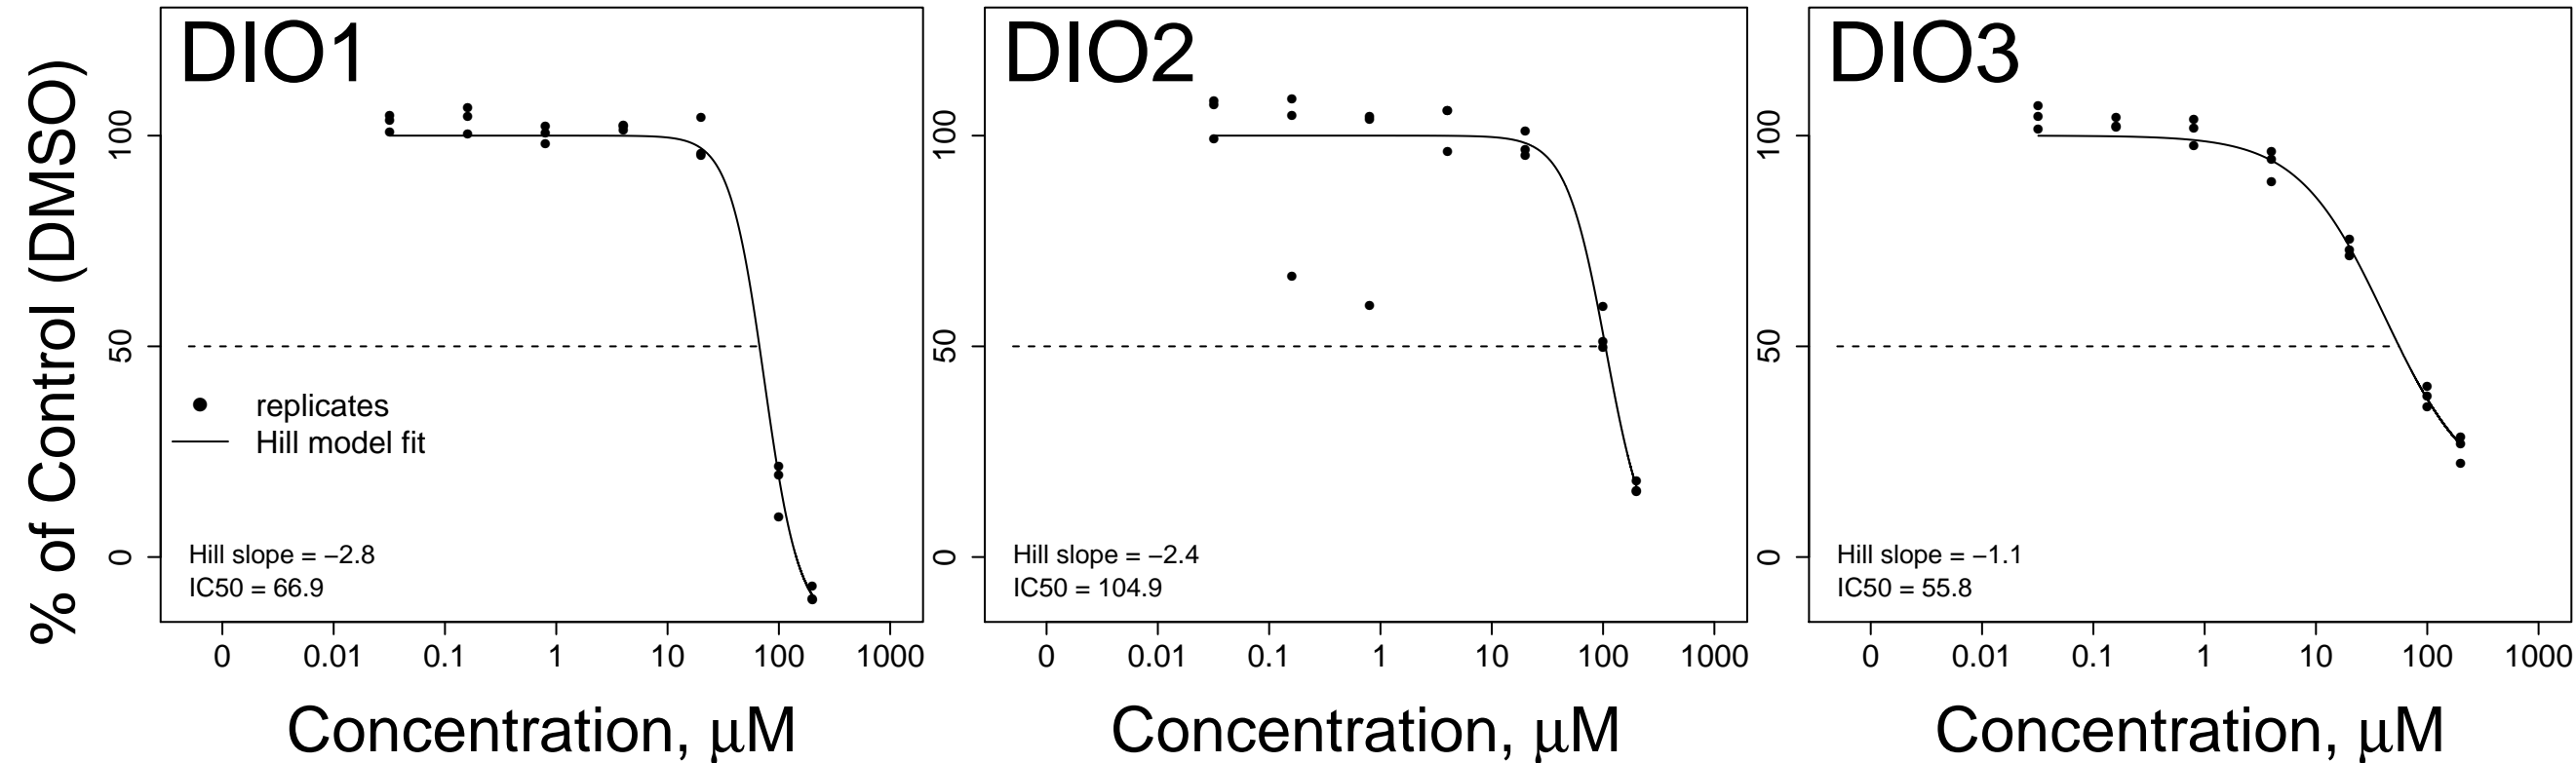

Benzalkonium chloride CASRN: 8001-54-5

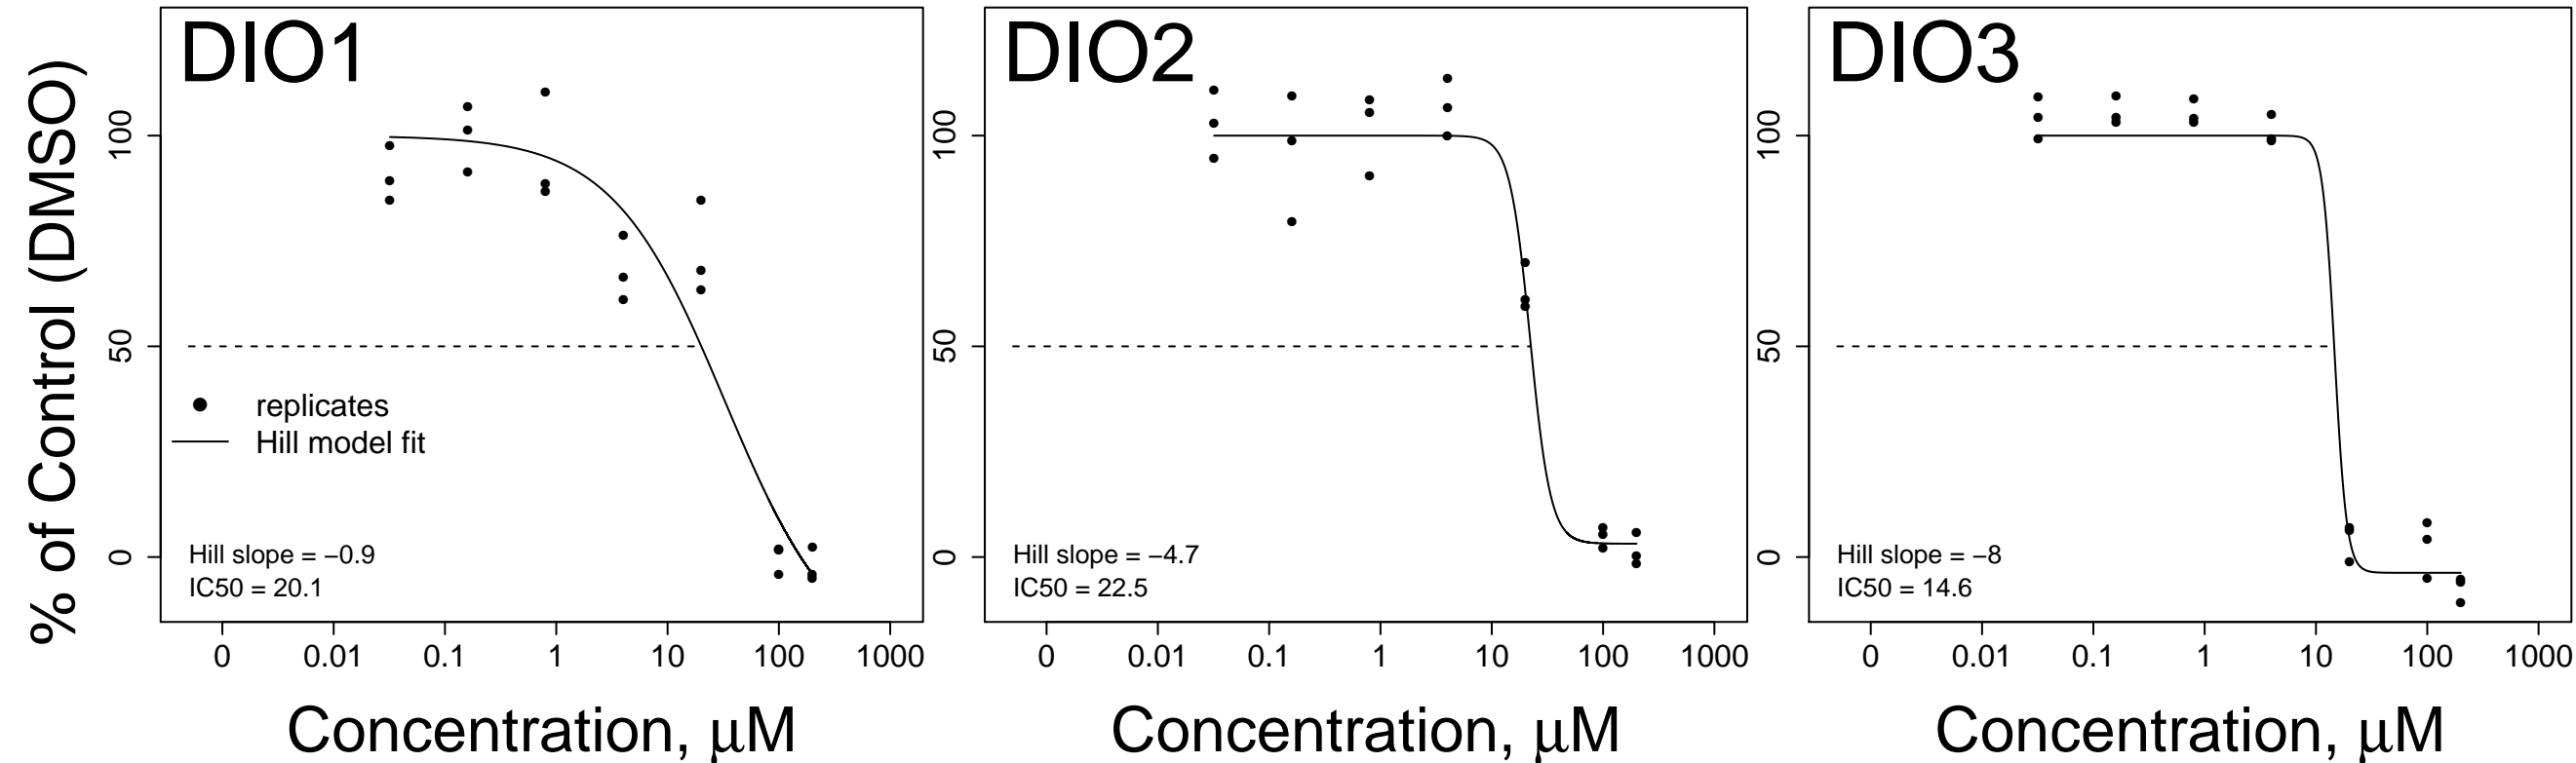

Tributyltetradecylphosphonium chloride CASRN: 81741-28-8

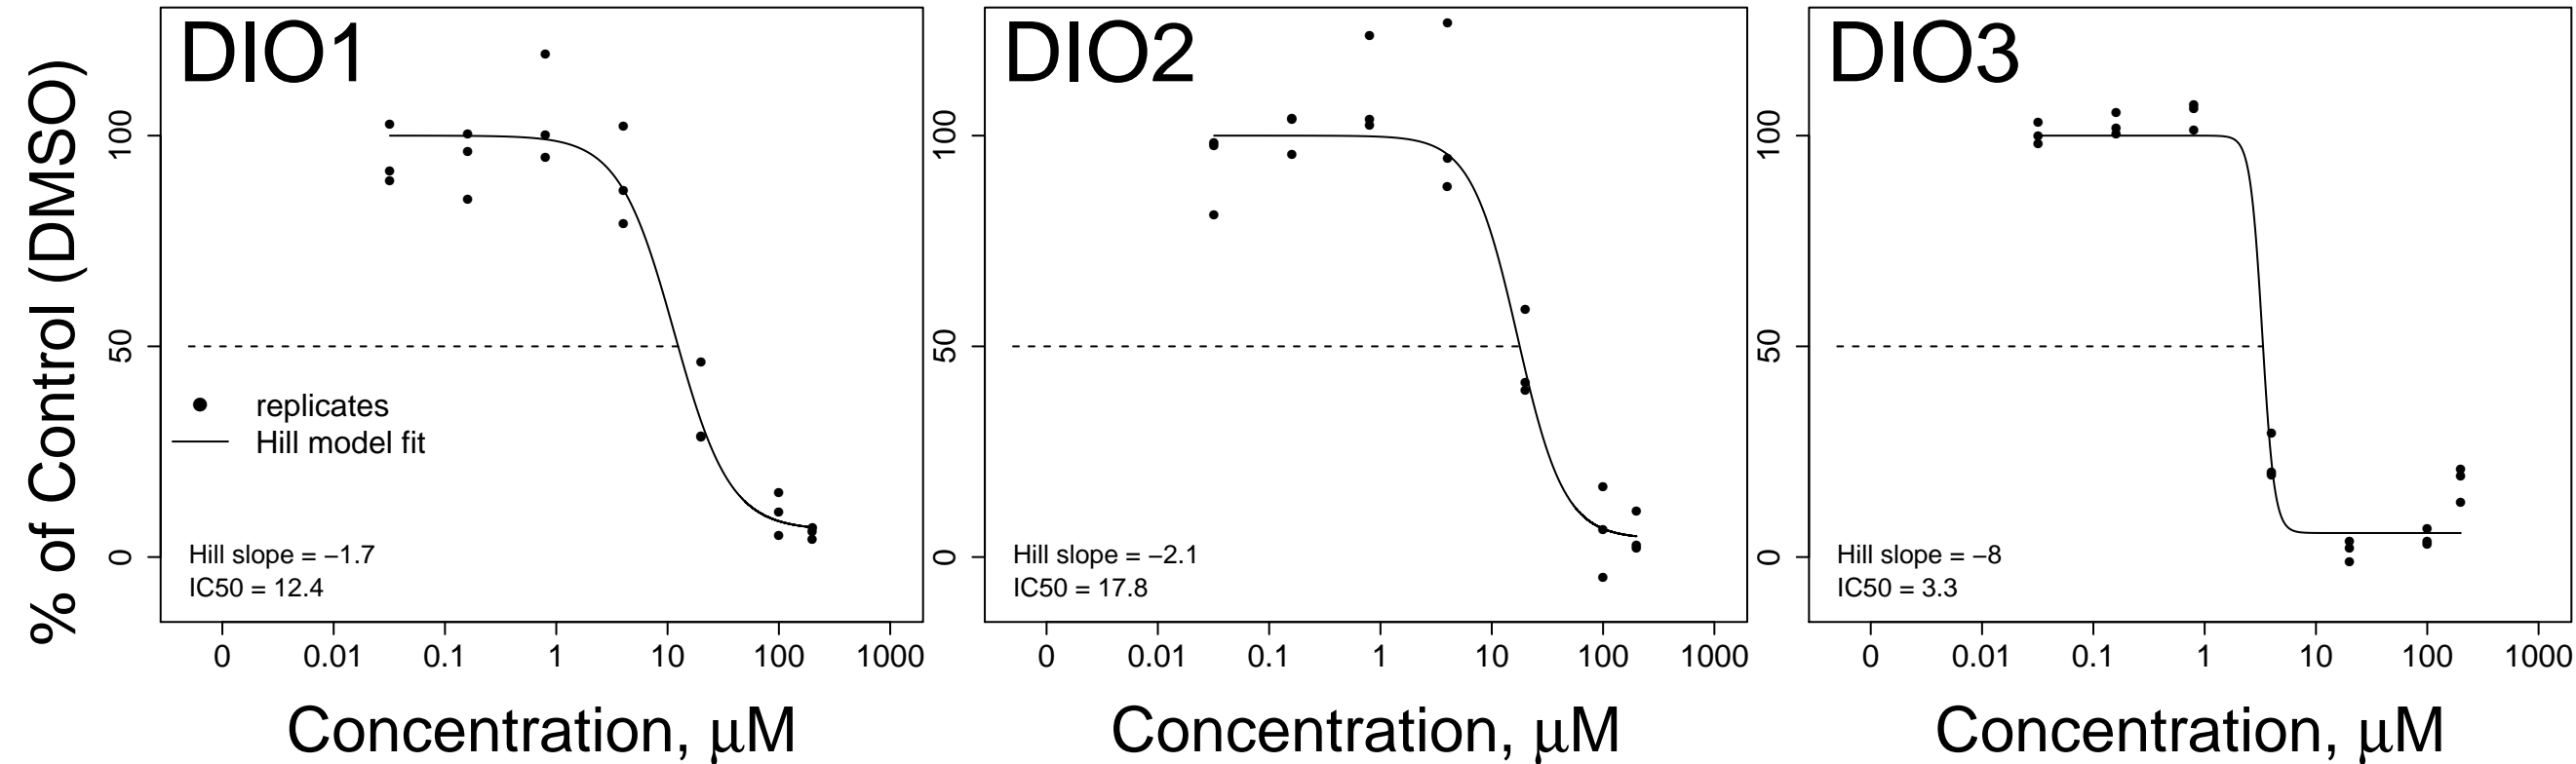

2,2'-Methylenebis(ethyl-6-tert-butylphenol) CASRN: 88-24-4

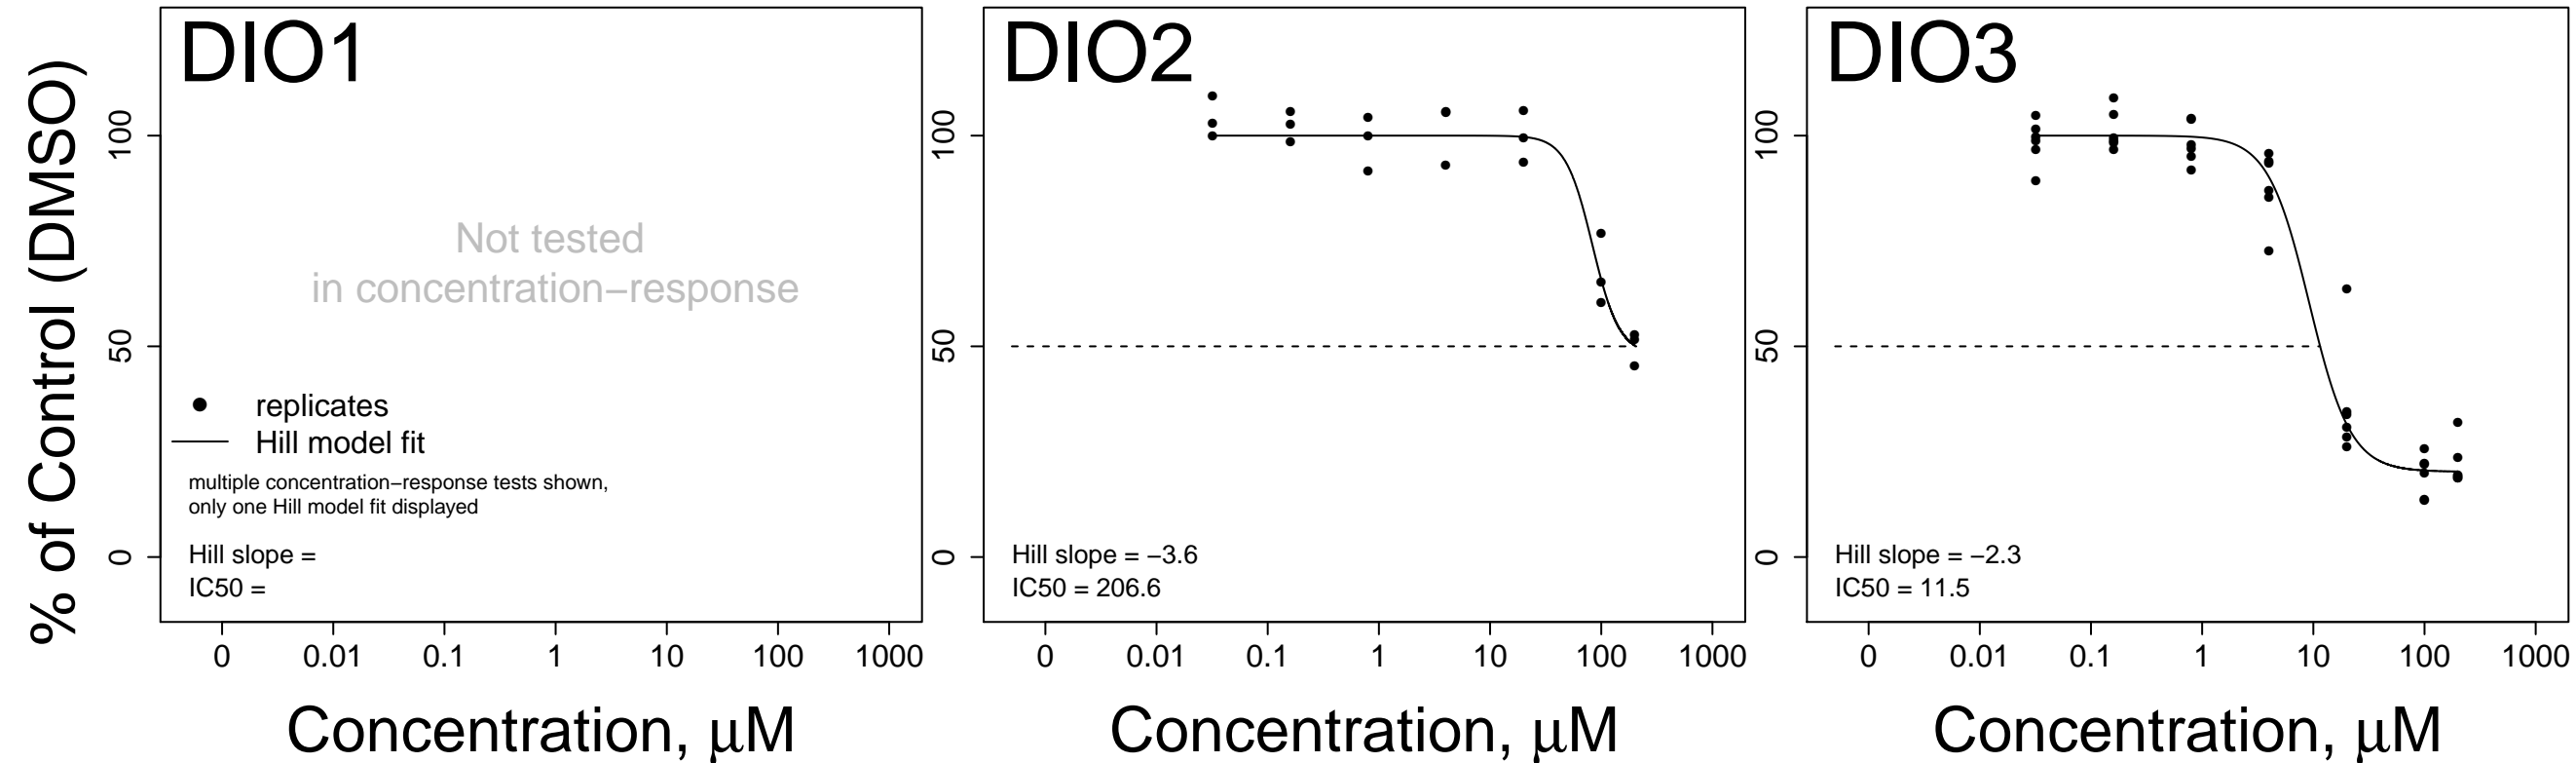



Polyoxyethylene monoleate CASRN: 9004-96-0

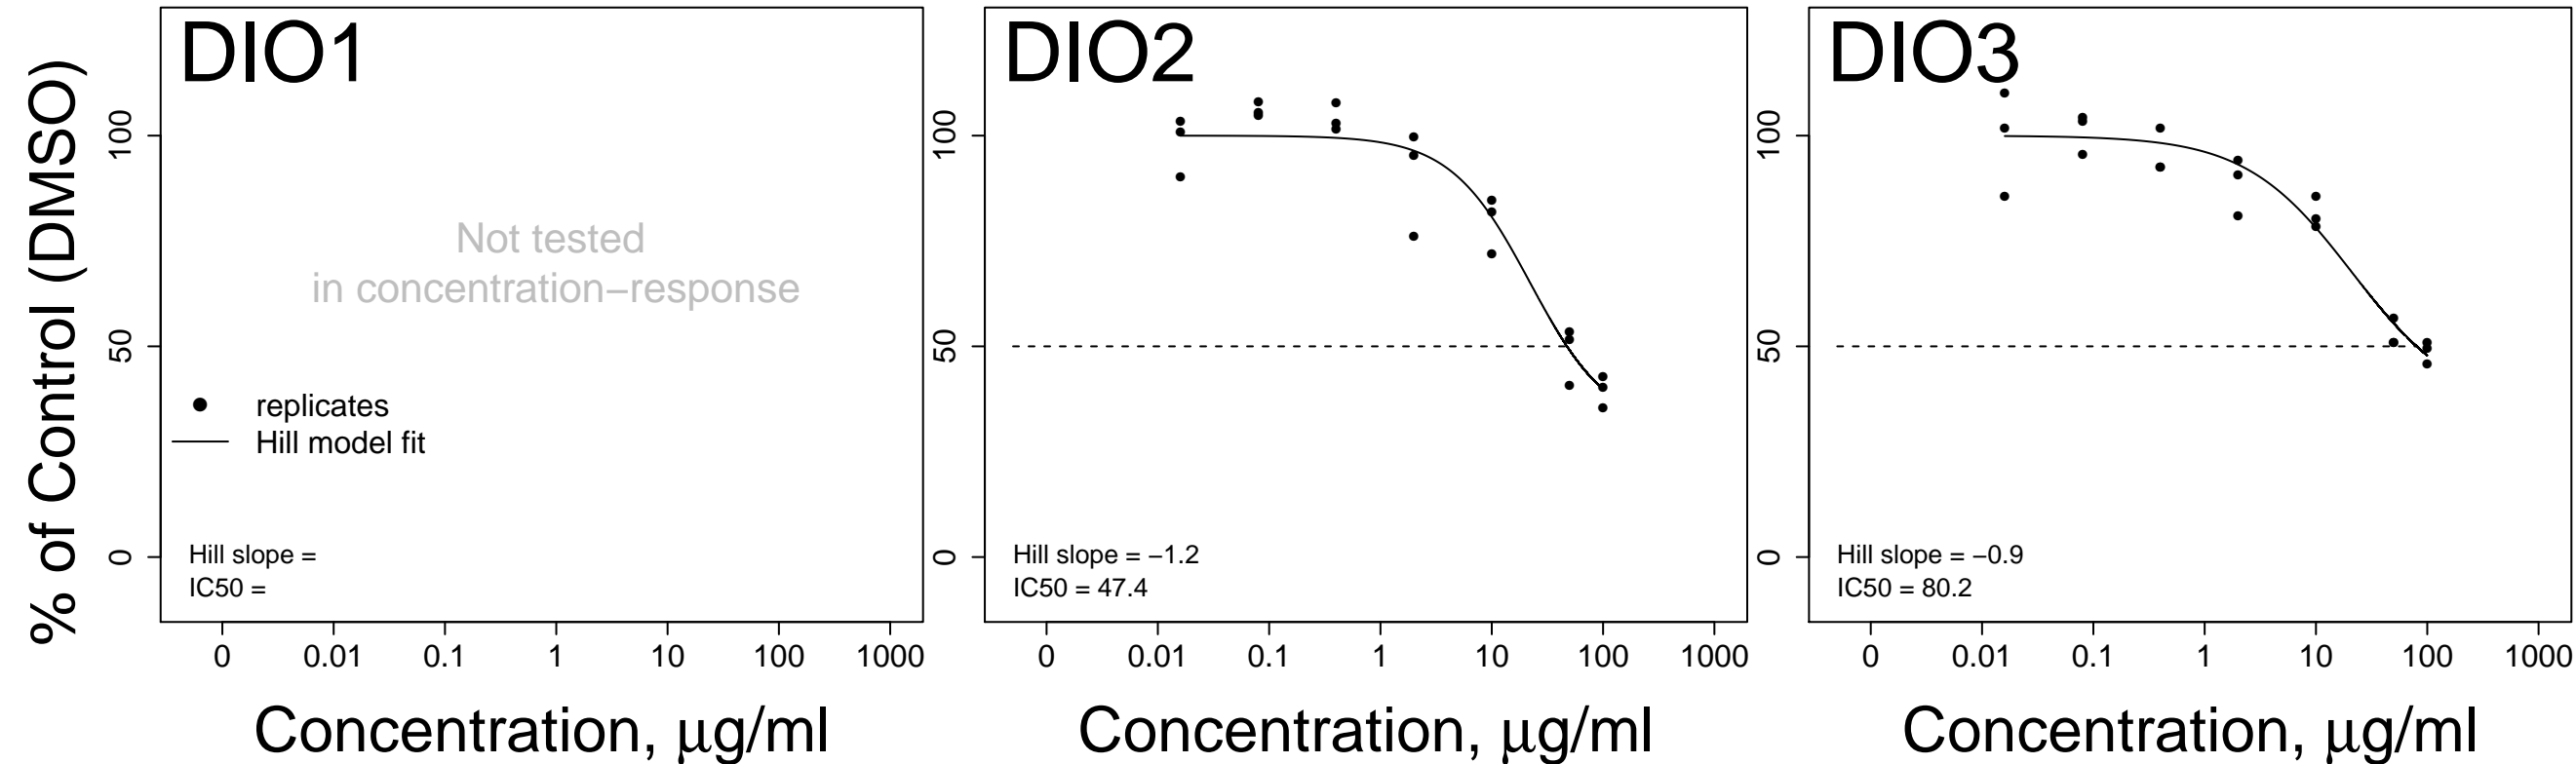

2-(8-Heptadecenyl)-2-imidazoline-1-ethanol CASRN: 95-38-5

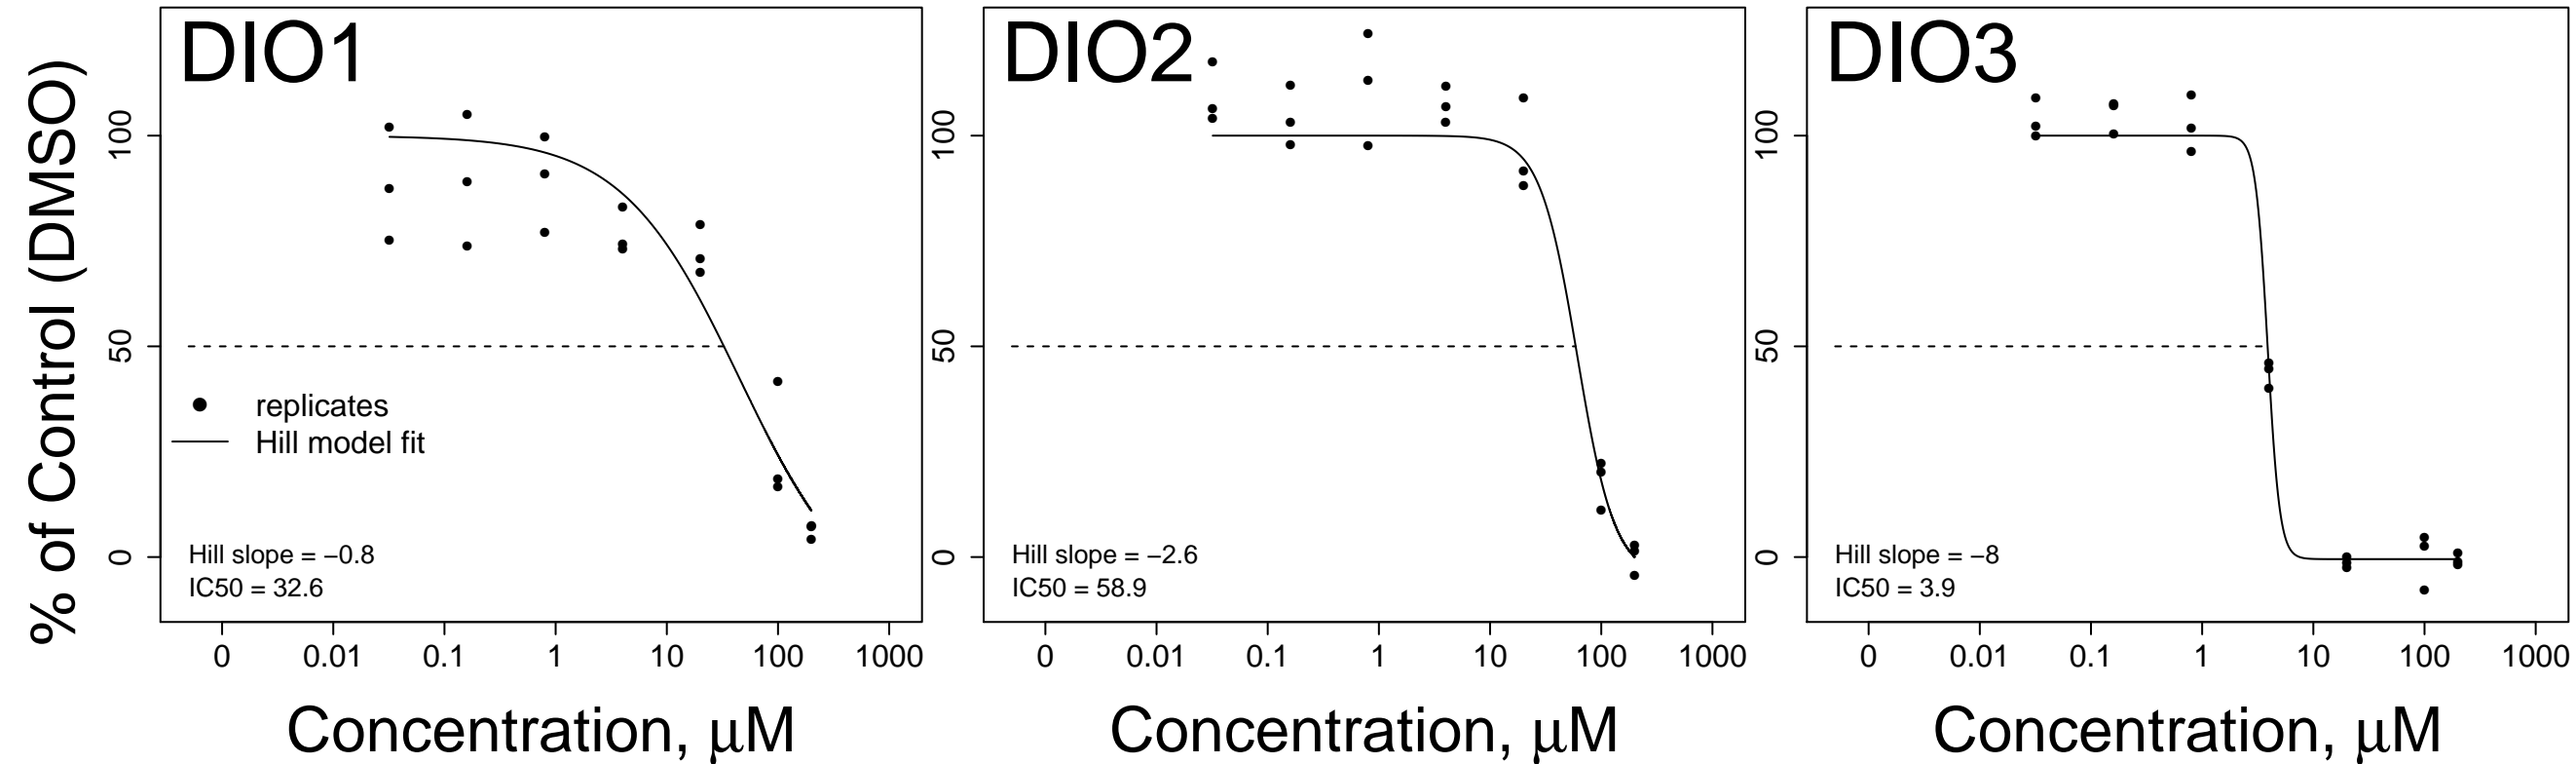

Triphenylborane CASRN: 960-71-4

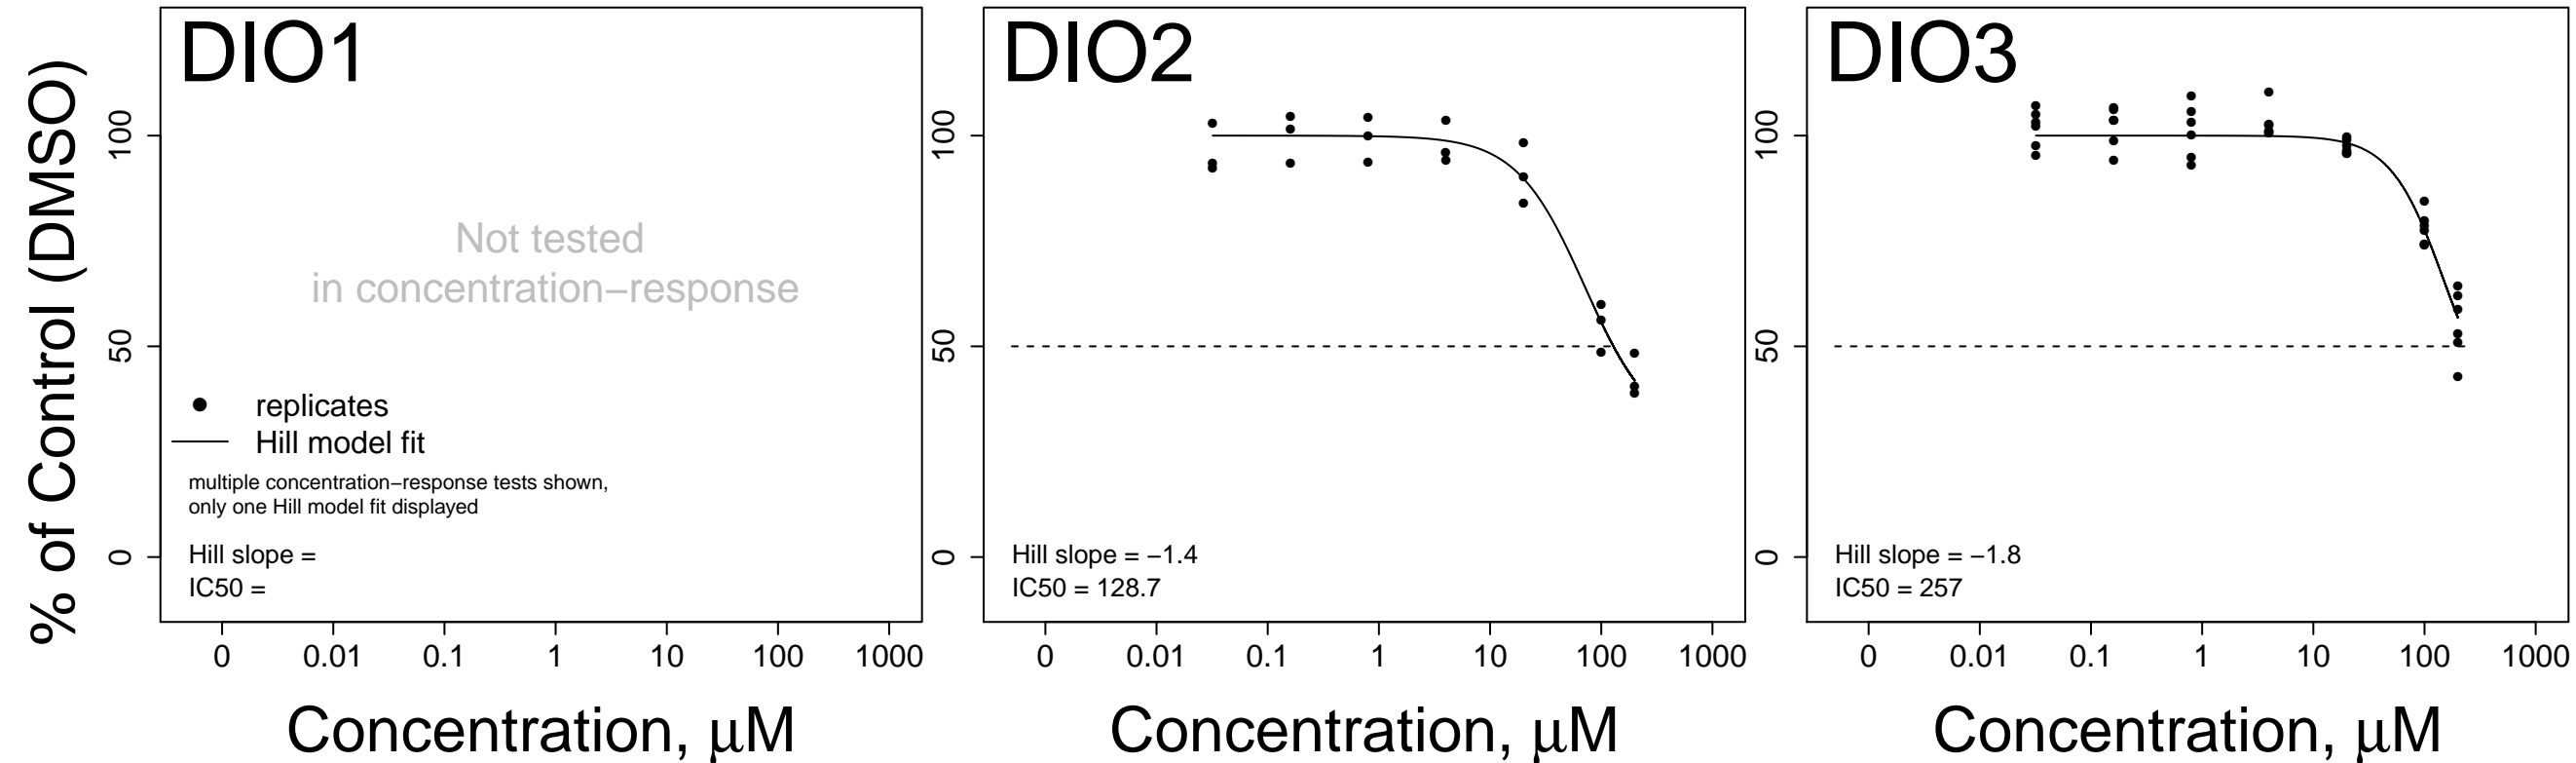

1-Chloro-2,4-dinitrobenzene CASRN: 97-00-7

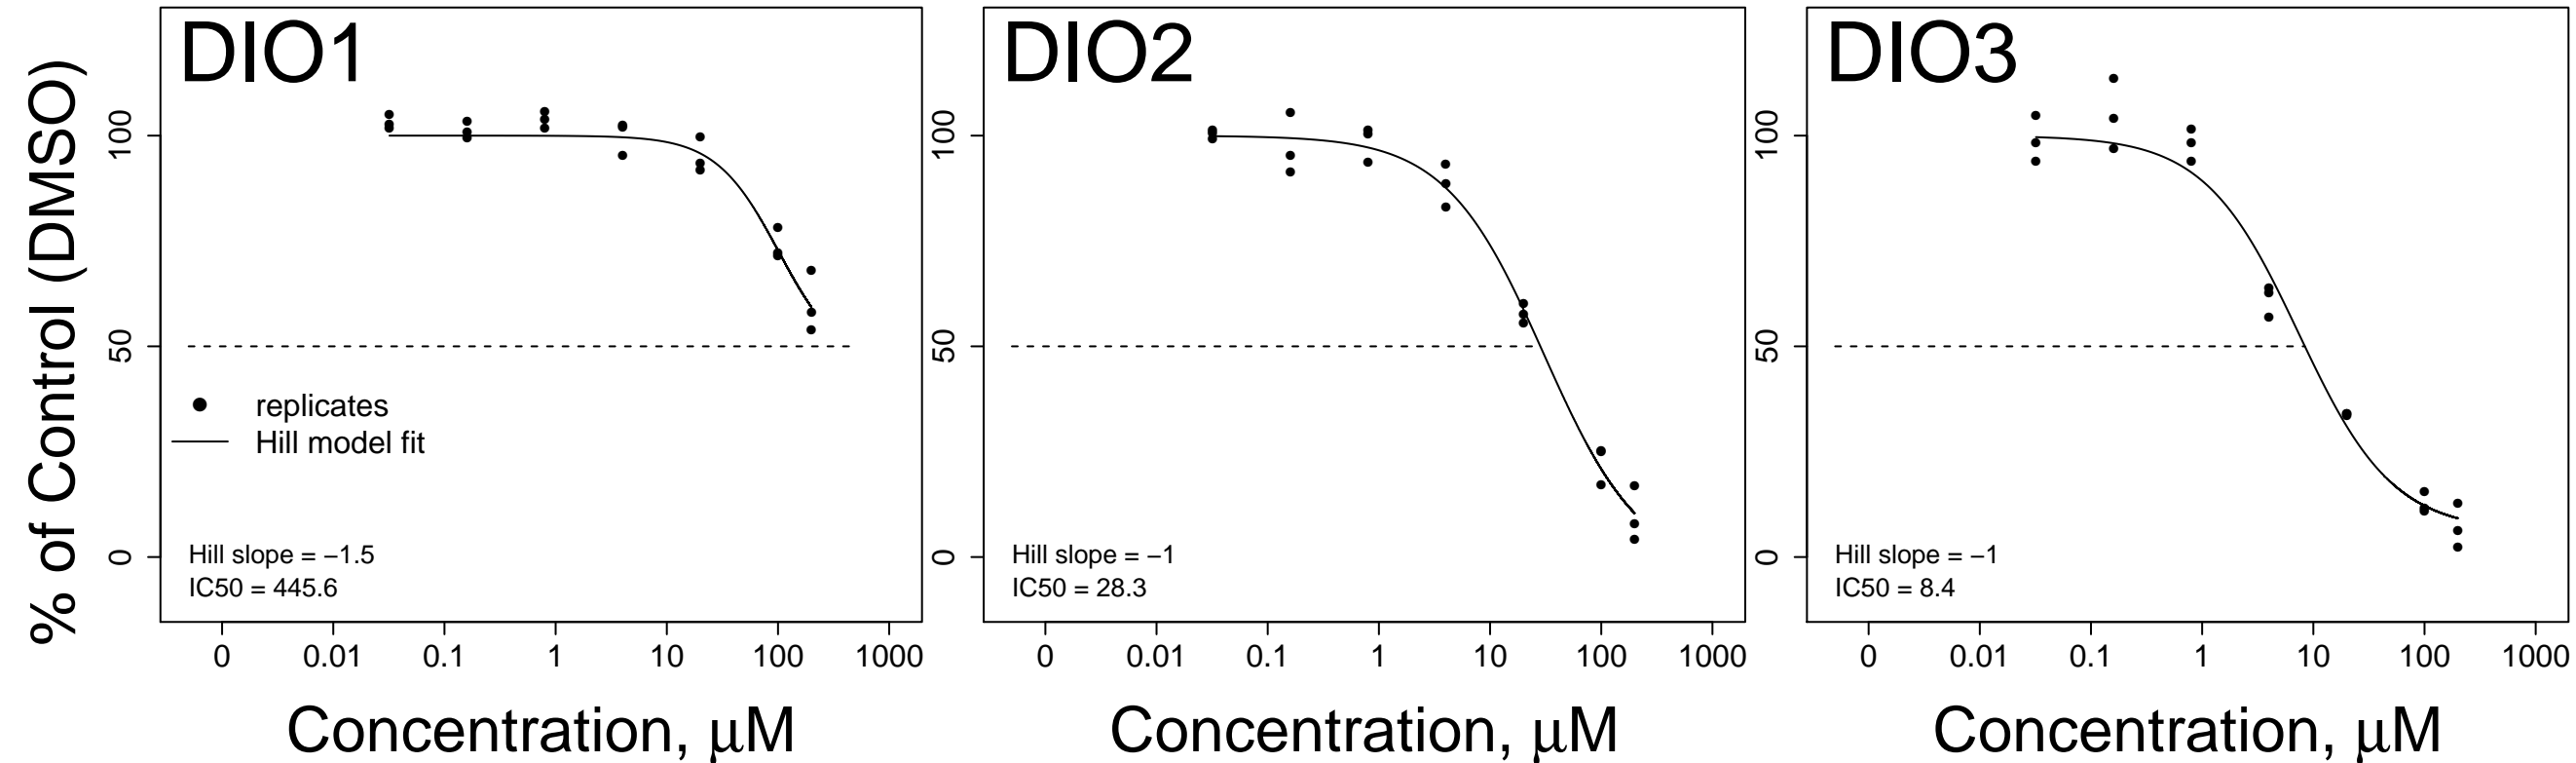

Dichlorophen CASRN: 97-23-4

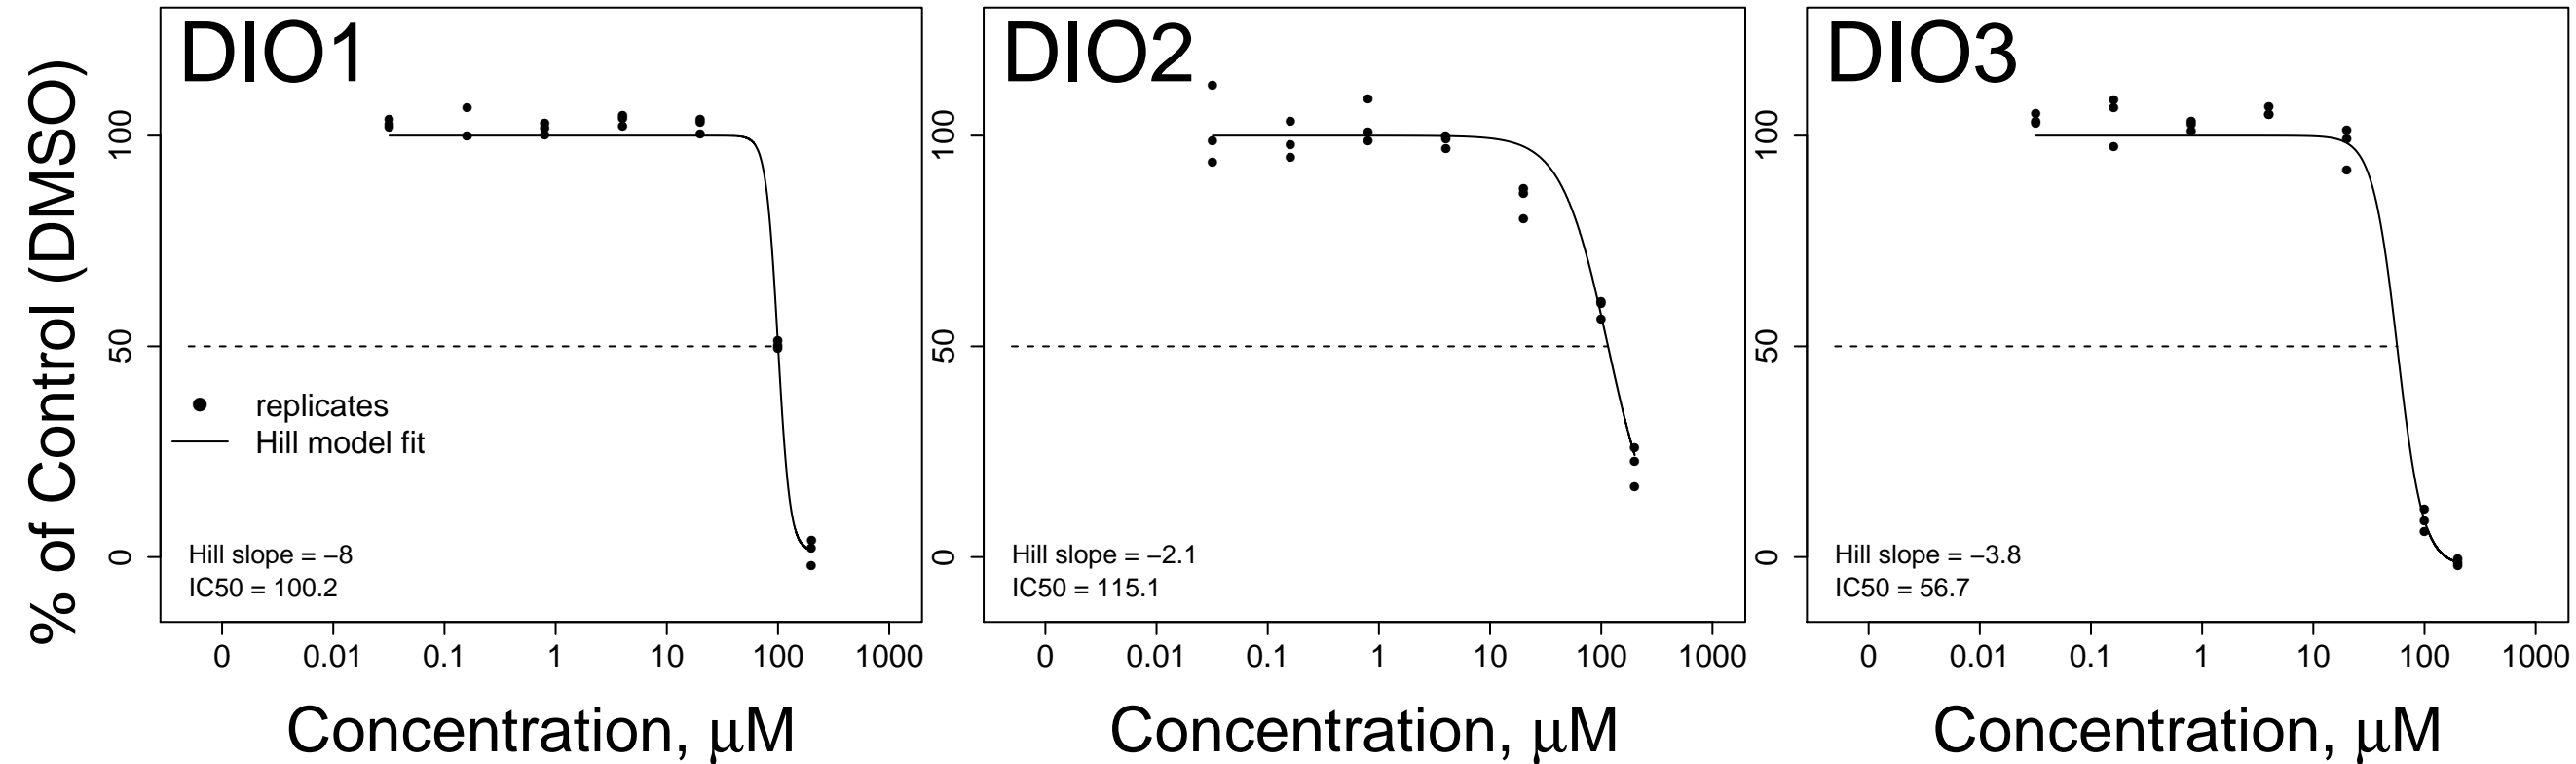

# Rhodamine 6G CASRN: 989-38-8

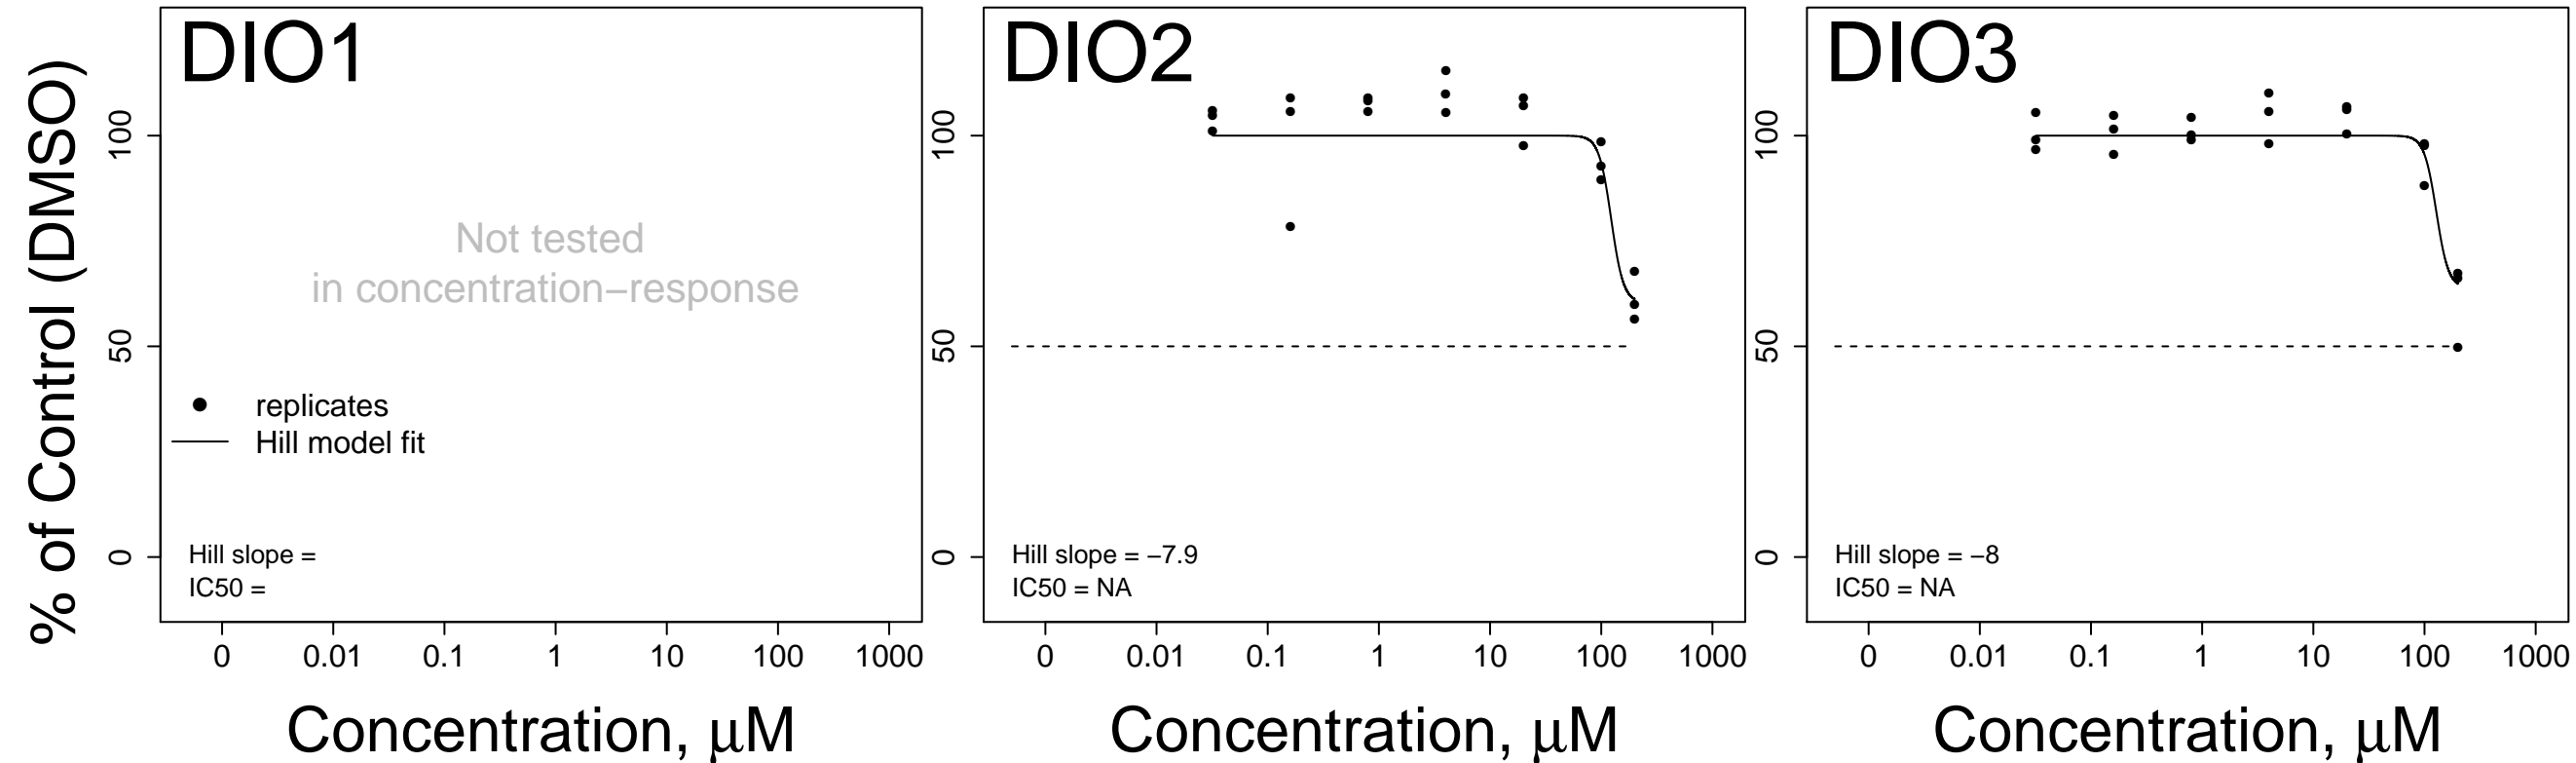

Supplement: NIHMS1527792-supplement-Supplement1.pdf [file NIHMS1527792-supplement-Supplement1.pdf]
